# Supplementary material for: Directed Differentiation of Embryonic Stem Cells Using a Bead-Based Combinatorial Screening Method
Source: PLOS journal article supplement (doi:10.1371/journal.pone.0104301), 2014-09-24

# Ariadne™

**Experiment 2 - CombiCult™ screen  
for Tyrosine Hydroxylase positive  
neurons using mES**

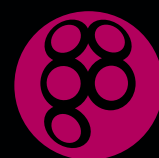

**Plasticell**

## EXECUTIVE SUMMARY

### OBJECTIVE

- The objective of this CombiCult™ study was to identify novel and/or efficient serum-free protocols for the differentiation of mouse embryonic stem cells (mESC) to dopaminergic neurons.

### COMBICULT™ EXPERIMENT

- 40 cell culture media were tested in 10,000 combinations.
- Approximately 480,000 beads were seeded with mES46C Sox1-GFP cells (Stem Cell Sciences).
- The experimental matrix comprised four split-pool cycles, performed on days 1, 7, 14 and 21.
- 10 media were assayed in each cycle, resulting in an experimental complexity of  $10 \times 10 \times 10 \times 10 = 10,000$  media combinations.
- On completion of cell culture (day 28) all beads were screened using an immunocytochemistry assay for the enzyme tyrosine hydroxylase, beads were isolated by COPAS.

### RESULTS

- 622 hits (0.36% of monomeric beads) were verified following inspection by microscopy.
- The cell culture history of 399 (64 % of hits) could be deduced unambiguously.
- The 399 hits were derived from 378 distinct putative differentiation protocols.
- Protocols were ranked and selected for validation using bespoke bioinformatics software, Ariadne™ (v1.0).
- The selected 23 validation protocols are listed in Table 1.

## EXECUTIVE SUMMARY CONTINUED

**Table 1:** The23 protocols selected for validation as by Ariadne™ (v1.0). Protocols are identified by the series of cell culture media that resulted in differentiation.

| Validation Number | Protocol | Bead Ids      |                  | Basal Medium  | Supplements                                                                                                     |
|-------------------|----------|---------------|------------------|---------------|-----------------------------------------------------------------------------------------------------------------|
| 1                 | 5-9-5-1  | 126, 135, 173 | Split 1 (Day 1)  | RHB-A         | -                                                                                                               |
|                   |          |               | Split 2 (Day 7)  | DMEM/F12      | 2mM Glutamine, 1X ITS suppl., 100ng/mL FGF8b, 500ng/mL mrShh.                                                   |
|                   |          |               | Split 3 (Day 15) | RHB-A         | -                                                                                                               |
|                   |          |               | Split 4 (Day 21) | DMEM/F12      | 2mM Glutamine, 1X N2 suppl. , 200μM ascorbic acid, 1mg/mL laminin                                               |
| 2                 | 9-9-5-1  | 1             | Split 1 (Day 1)  | DMEM/F12      | 2mM Glutamine, 1% BSA, 1X N2suppl., 20μM SB431542.                                                              |
|                   |          |               | Split 2 (Day 7)  | DMEM/F12      | 2mM Glutamine, 1X ITS suppl., 100ng/mL FGF8b, 500ng/mL mrShh.                                                   |
|                   |          |               | Split 3 (Day 15) | RHB-A         | -                                                                                                               |
|                   |          |               | Split 4 (Day 21) | DMEM/F12      | 2mM Glutamine, 1X N2 suppl. , 200μM ascorbic acid, 1mg/mL laminin                                               |
| 3                 | 5-9-10-1 | 71            | Split 1 (Day 1)  | RHB-A         | -                                                                                                               |
|                   |          |               | Split 2 (Day 7)  | DMEM/F12      | 2mM Glutamine, 1X ITS suppl., 100ng/mL FGF8b, 500ng/mL mrShh.                                                   |
|                   |          |               | Split 3 (Day 15) | DMEM/F12      | 2mM Glutamine, 1X N2 suppl., 20ng/mL bFGF, 20ng/mL EGF, 2ng/mL LIF.                                             |
|                   |          |               | Split 4 (Day 21) | DMEM/F12      | 2mM Glutamine, 1X N2 suppl. , 200μM ascorbic acid, 1mg/mL laminin                                               |
| 4                 | 5-10-5-1 | 46, 180       | Split 1 (Day 1)  | RHB-A         | -                                                                                                               |
|                   |          |               | Split 2 (Day 7)  | DMEM/F12      | 2mM Glutamine, 1X ITS suppl., 200μM ascorbic acid, 20ng/mL bFGF, 10ng/mL BDNF 100ng/mL FGF8b, 1μM purmorphamine |
|                   |          |               | Split 3 (Day 15) | RHB-A         | -                                                                                                               |
|                   |          |               | Split 4 (Day 21) | DMEM/F12      | 2mM Glutamine, 1X N2 suppl. , 200μM ascorbic acid, 1mg/mL laminin                                               |
| 5                 | 5-9-9-1  | 26            | Split 1 (Day 1)  | RHB-A         | -                                                                                                               |
|                   |          |               | Split 2 (Day 7)  | DMEM/F12      | 2mM Glutamine, 1X ITS suppl., 100ng/mL FGF8b, 500ng/mL mrShh.                                                   |
|                   |          |               | Split 3 (Day 15) | Advanced DMEM | 2mM Glutamine                                                                                                   |
|                   |          |               | Split 4 (Day 21) | DMEM/F12      | 2mM Glutamine, 1X N2 suppl. , 200μM ascorbic acid, 1mg/mL laminin                                               |
| 6                 | 5-4-5-1  | 40            | Split 1 (Day 1)  | RHB-A         | -                                                                                                               |
|                   |          |               | Split 2 (Day 7)  | DMEM/F12      | 2mM Glutamine, 1X ITS suppl., 0.5μM retinoic acid.                                                              |
|                   |          |               | Split 3 (Day 15) | RHB-A         | -                                                                                                               |
|                   |          |               | Split 4 (Day 21) | DMEM/F12      | 2mM Glutamine, 1X N2 suppl., 200μM ascorbic acid, 1mg/mL laminin.                                               |
| 7                 | 4-9-5-1  | 183           | Split 1 (Day 1)  | DMEM/F12      | 2mM Glutamine, 1% BSA, 1X N2 suppl., 1X B27 neuromix.                                                           |
|                   |          |               | Split 2 (Day 7)  | DMEM/F12      | 2mM Glutamine, 1X ITS suppl., 100ng/mL FGF8b, 500ng/mL mrShh.                                                   |
|                   |          |               | Split 3 (Day 15) | RHB-A         | -                                                                                                               |
|                   |          |               | Split 4 (Day 21) | DMEM/F12      | 2mM Glutamine, 1X N2 suppl. , 200μM ascorbic acid, 1mg/mL laminin                                               |
| 8                 | 6-8-1-1  | 8, 128, 134   | Split 1 (Day 1)  | KO DMEM       | 10% KSR, 1mM Glutamine                                                                                          |
|                   |          |               | Split 2 (Day 7)  | Advanced DMEM | 2mM Glutamine                                                                                                   |
|                   |          |               | Split 3 (Day 15) | DMEM/F12      | 2mM Glutamine, 1X ITS suppl., 20ng/mL bFGF.                                                                     |

| Validation Number | Protocol | Bead Ids |                  | Basal Medium  | Supplements                                                                                                        |
|-------------------|----------|----------|------------------|---------------|--------------------------------------------------------------------------------------------------------------------|
|                   |          |          | Split 4 (Day 21) | DMEM/F12      | 2mM Glutamine, 1X N2 suppl. , 200µM ascorbic acid, 1mg/mL laminin                                                  |
| 9                 | 6-9-1-1  | 163      | Split 1 (Day 1)  | KO DMEM       | 10% KSR, 1mM Glutamine                                                                                             |
|                   |          |          | Split 2 (Day 7)  | DMEM/F12      | 2mM Glutamine, 1X ITS suppl., 100ng/mL FGF8b, 500ng/mL mrShh.                                                      |
|                   |          |          | Split 3 (Day 15) | DMEM/F12      | 2mM Glutamine, 1X ITS suppl., 20ng/mL bFGF.                                                                        |
|                   |          |          | Split 4 (Day 21) | DMEM/F12      | 2mM Glutamine, 1X N2 suppl., 200µM ascorbic acid, 1mg/mL laminin                                                   |
| 10                | 1-5-2-1  | 166, 171 | Split 1 (Day 1)  | KO DMEM       | 15% FBS, 2mM Glutamine, 0.1mM β-mercaptoethanol, 1X NEAA, 1000 Units/mL LIF (standard growth media for mES cells). |
|                   |          |          | Split 2 (Day 7)  | RHB-A         | -                                                                                                                  |
|                   |          |          | Split 3 (Day 15) | DMEM/F12      | 2mM Glutamine, 1X ITS suppl., 20ng/mL bFGF, 1mg/mL laminin                                                         |
|                   |          |          | Split 4 (Day 21) | DMEM/F12      | 2mM Glutamine, 1X N2 suppl. , 200µM ascorbic acid, 1mg/mL laminin                                                  |
| 11                | 1-5-2-4  | 284, 299 | Split 1 (Day 1)  | KO DMEM       | 15% FBS, 2mM Glutamine, 0.1mM β-mercaptoethanol, 1X NEAA, 1000 Units/mL LIF (standard growth media for mES cells). |
|                   |          |          | Split 2 (Day 7)  | RHB-A         | -                                                                                                                  |
|                   |          |          | Split 3 (Day 15) | DMEM/F12      | 2mM Glutamine, 1X ITS suppl., 20ng/mL bFGF, 1mg/mL laminin                                                         |
|                   |          |          | Split 4 (Day 21) | DMEM/F12      | 2mM Glutamine, 1X ITS suppl., 1µM cAMP, 10ng/mL hrBDNF                                                             |
| 12                | 1-5-2-9  | 443      | Split 1 (Day 1)  | KO DMEM       | 15% FBS, 2mM Glutamine, 0.1mM β-mercaptoethanol, 1X NEAA, (standard growth media for mES cells), 1000 Units/mL LIF |
|                   |          |          | Split 2 (Day 7)  | RHB-A         | -                                                                                                                  |
|                   |          |          | Split 3 (Day 15) | DMEM/F12      | 2mM Glutamine, 1X ITS suppl., 20ng/mL bFGF, 1mg/mL laminin                                                         |
|                   |          |          | Split 4 (Day 21) | Advanced DMEM | 2mM Glutamine                                                                                                      |
| 13                | 4-6-7-1  | 77, 139  | Split 1 (Day 1)  | DMEM/F12      | 2mM Glutamine, 1% BSA, 1X N2 suppl., 1X B27 neuromix.                                                              |
|                   |          |          | Split 2 (Day 7)  | KO DMEM       | 10% KSR, 2mM Glutamine.                                                                                            |
|                   |          |          | Split 3 (Day 15) | DMEM/F12      | 2mM Glutamine, 1X ITS suppl., 1X B27 suppl., 50ng/mL mr Dkk1                                                       |
|                   |          |          | Split 4 (Day 21) | DMEM/F12      | 2mM Glutamine, 1X N2 suppl. , 200µM ascorbic acid, 1mg/mL laminin                                                  |
| 14                | 7-9-2-9  | 438, 517 | Split 1 (Day 1)  | DMEM/F12      | 2mM Glutamine, 1% BSA, 1X ITS suppl., 20ng/mL bFGF                                                                 |
|                   |          |          | Split 2 (Day 7)  | DMEM/F12      | 2mM Glutamine, 1X ITS suppl., 100ng/mL FGF8b, 500ng/mL mrShh.                                                      |
|                   |          |          | Split 3 (Day 15) | DMEM/F12      | 2mM Glutamine, 1X ITS suppl., 20ng/mL bFGF, 1mg/mL laminin                                                         |
|                   |          |          | Split 4 (Day 21) | Advanced DMEM | 2mM Glutamine                                                                                                      |
| 15                | 5-9-2-9  | 488      | Split 1 (Day 1)  | RHB-A         | -                                                                                                                  |
|                   |          |          | Split 2 (Day 7)  | DMEM/F12      | 2mM Glutamine, 1X ITS suppl., 100ng/mL FGF8b, 500ng/mL mrShh.                                                      |
|                   |          |          | Split 3 (Day 15) | DMEM/F12      | 2mM Glutamine, 1X N2 suppl., 20ng/mL bFGF, 1mg/mL laminin                                                          |
|                   |          |          | Split 4 (Day 21) | Advanced DMEM | 2mM Glutamine                                                                                                      |
| 16                | 5-9-2-1  | 121      | Split 1 (Day 1)  | RHB-A         | -                                                                                                                  |
|                   |          |          | Split 2 (Day 7)  | DMEM/F12      | 2mM Glutamine, 1X ITS suppl., 100ng/mL FGF8b, 500ng/mL mrShh.                                                      |
|                   |          |          | Split 3 (Day 15) | DMEM/F12      | 2mM Glutamine, 1X N2 suppl., 20ng/mL bFGF, 1mg/mL laminin                                                          |
|                   |          |          | Split 4 (Day 21) | DMEM/F12      | 2mM Glutamine, 1X N2 suppl. , 200µM ascorbic acid, 1mg/mL laminin                                                  |



| Validation Number | Protocol  | Bead Ids |                  | Basal Medium  | Supplements                                                                                                     |
|-------------------|-----------|----------|------------------|---------------|-----------------------------------------------------------------------------------------------------------------|
| 17                | 3-1-10-1  | 48, 159  | Split 1 (Day 1)  | Advanced DMEM | 2mM Glutamine                                                                                                   |
|                   |           |          | Split 2 (Day 7)  | DMEM/F12      | 2mM Glutamine, 1X ITS suppl., 5mg/mL fibronectin.                                                               |
|                   |           |          | Split 3 (Day 15) | DMEM/F12      | 2mM Glutamine, 1X N2 suppl., 20ng/mL bFGF, 20ng/mL EGF, 2ng/mL LIF.                                             |
|                   |           |          | Split 4 (Day 21) | DMEM/F12      | 2mM Glutamine, 1X N2 suppl. , 200µM ascorbic acid, 1mg/mL laminin                                               |
| 18                | 9-10-10-1 | 172      | Split 1 (Day 1)  | DMEM/F12      | 2mM Glutamine, 1% BSA, 1X N2suppl., 20mM SB431542.                                                              |
|                   |           |          | Split 2 (Day 7)  | DMEM/F12      | 2mM Glutamine, 1X ITS suppl., 200mM ascorbic acid, 20ng/mL bFGF, 10ng/mL BDNF 100ng/mL FGF8b, 1µM purmorphamine |
|                   |           |          | Split 3 (Day 15) | DMEM/F12      | 2mM Glutamine, 1X N2 suppl., 20ng/mL bFGF, 20ng/mL EGF, 2ng/mL LIF.                                             |
|                   |           |          | Split 4 (Day 21) | DMEM/F12      | 2mM Glutamine, 1X N2 suppl. , 200mM ascorbic acid, 1mg/mL laminin                                               |
| 19                | 9-2-10-1  | 113      | Split 1 (Day 1)  | DMEM/F12      | 2mM Glutamine, 1% BSA, 1X N2suppl., 20µM SB431542.                                                              |
|                   |           |          | Split 2 (Day 7)  | DMEM/F12      | 2mM Glutamine, 1X ITS suppl., 100ng/mL mr Noggin.                                                               |
|                   |           |          | Split 3 (Day 15) | DMEM/F12      | 2mM Glutamine, 1X N2 suppl., 20ng/mL bFGF, 20ng/mL EGF, 2ng/mL LIF.                                             |
|                   |           |          | Split 4 (Day 21) | DMEM/F12      | 2mM Glutamine, 1X N2 suppl. , 200mM ascorbic acid, 1mg/mL laminin                                               |
| 20                | 9-4-6-1   | 81, 108  | Split 1 (Day 1)  | DMEM/F12      | 2mM Glutamine, 1% BSA, 1X N2suppl., 20µM SB431542.                                                              |
|                   |           |          | Split 2 (Day 7)  | DMEM/F12      | 2mM Glutamine, 1X ITS suppl., 0.5µM retinoic acid.                                                              |
|                   |           |          | Split 3 (Day 15) | KO DMEM       | 10% KSR, 2mM Glutamine                                                                                          |
|                   |           |          | Split 4 (Day 21) | DMEM/F12      | 2mM Glutamine, 1X N2 suppl. , 200µM ascorbic acid, 1mg/mL laminin                                               |
| 21                | 5-10-2-2  | 186      | Split 1 (Day 1)  | RHB-A         | -                                                                                                               |
|                   |           |          | Split 2 (Day 7)  | DMEM/F12      | 2mM Glutamine, 1X ITS suppl., 200µM ascorbic acid, 20ng/mL bFGF, 10ng/mL BDNF 100ng/mL FGF8b, 1µM purmorphamine |
|                   |           |          | Split 3 (Day 15) | DMEM/F12      | 2mM Glutamine, 1X ITS suppl., 20ng/mL bFGF, 1mg/mL laminin                                                      |
|                   |           |          | Split 4 (Day 21) | DMEM/F12      | 2mM Glutamine, 0.5% FBS, 1X N2 suppl., 20ng/mL hr GDNF, 20ng/mL hr BDNF                                         |
| 22                | 5-10-9-9  | 476, 508 | Split 1 (Day 1)  | RHB-A         | -                                                                                                               |
|                   |           |          | Split 2 (Day 7)  | DMEM/F12      | 2mM Glutamine, 1X ITS suppl., 200µM ascorbic acid, 20ng/mL bFGF, 10ng/mL BDNF 100ng/mL FGF8b, 1µM purmorphamine |
|                   |           |          | Split 3 (Day 15) | Advanced DMEM | 2mM Glutamine                                                                                                   |
|                   |           |          | Split 4 (Day 21) | Advanced DMEM | 2mM Glutamine                                                                                                   |
| 23                | 5-10-6-1  | 141      | Split 1 (Day 1)  | RHB-A         | -                                                                                                               |
|                   |           |          | Split 2 (Day 7)  | DMEM/F12      | 2mM Glutamine, 1X ITS suppl., 200µM ascorbic acid, 20ng/mL bFGF, 10ng/mL BDNF 100ng/mL FGF8b, 1µM purmorphamine |
|                   |           |          | Split 3 (Day 15) | KO DMEM       | 10% KSR, 2mM Glutamine                                                                                          |
|                   |           |          | Split 4 (Day 21) | DMEM/F12      | 2mM Glutamine, 1X N2 suppl. , 200µM ascorbic acid, 1mg/mL laminin                                               |

## CONTENTS

Executive Summary

Report Nomenclature

1. Introduction

2. Study Setup

3. Split-Pool Experiment

3.1 Cell Culture Media

3.2 Tag Assignment

4. Bead Screening

4.1 Screening Assay

4.2 Flow Sorting of 'Hit' Beads

5. Tag Deconvolution

6. Protocol Analysis

6.1 Dataset Review

6.2 Linkage Analysis

6.3 Fingerprint Analysis

6.4 Hierarchical Clustering Dendrogram

6.5 Similarity Matrix

7. Summary and Conclusions

Annex 1: Flow sorting scatter plots

Annex 2: Tag reference set and calibrated selection gates for each tag identification session

Annex 3: Tag identification scatter plots and histograms for each hit

## GLOSSARY

**Screening matrix** refers to the arrangement and identity of media in the split-pool experiment

**Experimental complexity** is the total number of combinations of media tested, or the number of different protocols tested

**Hit** is a bead which scores positive in the screening assay and is sorted by COPAS

**COPAS** is a large particle flow sorter manufactured by Union Bioimetrica Inc.

**Deconvolution** is the inference of cell culture history by tag analysis

**Bin** refers to the sum of beads in each final cell culture medium

**Session** refers to the FACS analysis of tags from a group of hits. Prior to each session a reference tag set was run to calibrate side and forward scatter, and fluorescence intensity gates

**Fingerprint analysis** is a method of finding and comparing hits derived from identical protocols and groups of beads with similar protocols

**Probability (of occurrence of a group in the fingerprint analysis)** is the probability of that cluster of protocols occurring by chance, assuming beads sample all protocols randomly

**Hierarchical clustering** is a hierarchy of protocol clusters, represented in a dendrogram

**Similarity matrix** is a diagrammatical representation of a pair-wise comparison of all protocols

**DPBS ++** is Dulbecco's modified phosphate buffer saline with calcium chloride and magnesium chloride.

# 1. INTRODUCTION

## COMBICULT™ TECHNOLOGY

CombiCult™ is a proprietary bead-based combinatorial technology specifically developed for discovery of novel stem cell differentiation protocols. Stem cells on beads are exposed to multiple combinations of media, containing active agents such as growth factors or small molecules. The optimal combinations for effective differentiation can be deduced reliably, rapidly and cost effectively.

**Figure 1:** CombiCult™ technology

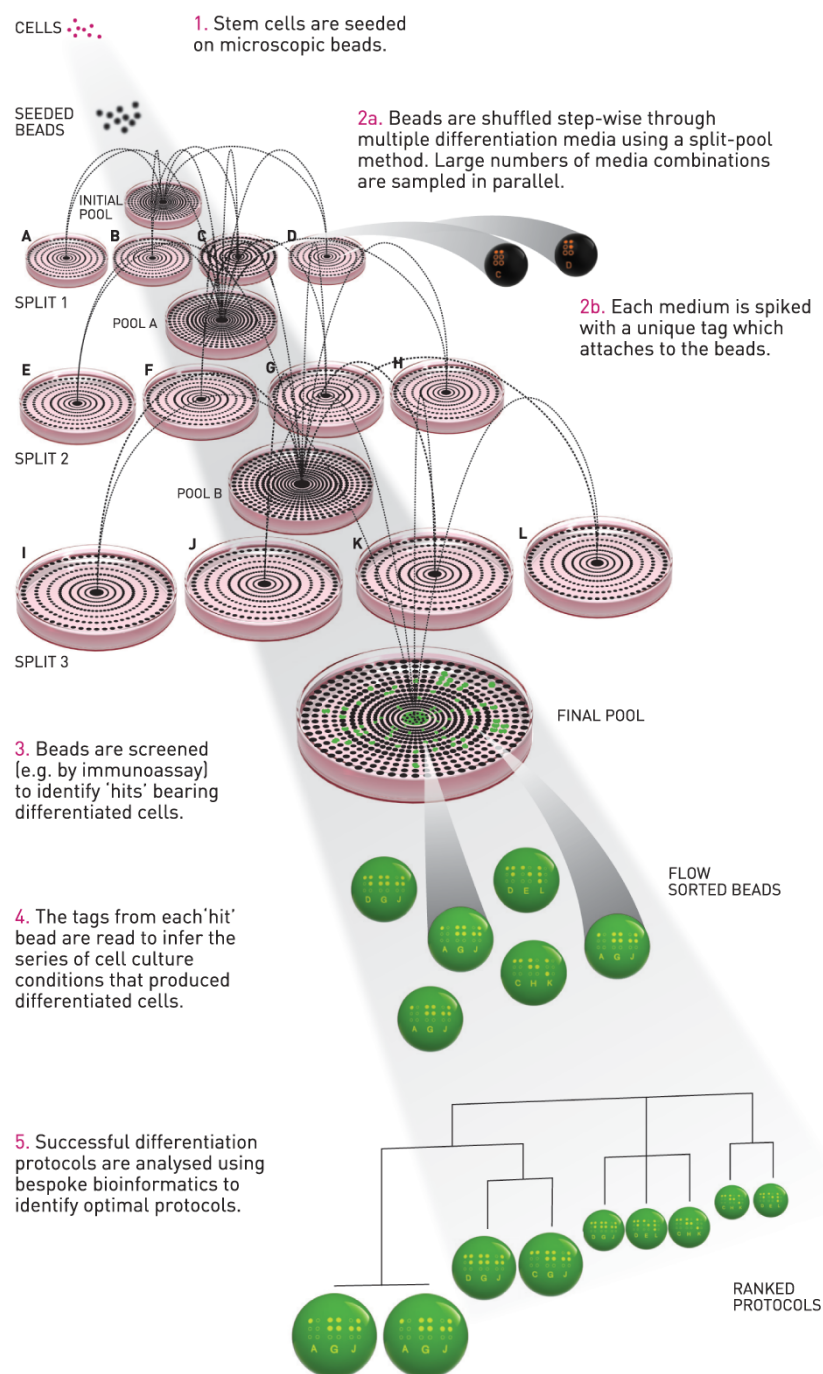

## 1. INTRODUCTION CONTINUED

### OBJECTIVE

The objective of this CombiCult™ study was to identify efficient and/or novel protocols for the differentiation of mouse embryonic stem cells (mESC) to dopaminergic neurons.

### STUDY

The experimental matrix comprised 40 cell culture media distributed over four split-pool cycles (splits) such that a total of 10,000 media combinations (protocols) were tested. Below is a depiction of the experimental design (Figure 2) showing the timing and number of media in each split. On completion of the cell culture phase, on day 28, beads were screened using immunocytochemistry assay to identify differentiated cells.

**Figure 2:** Schematic diagram of the experimental matrix.

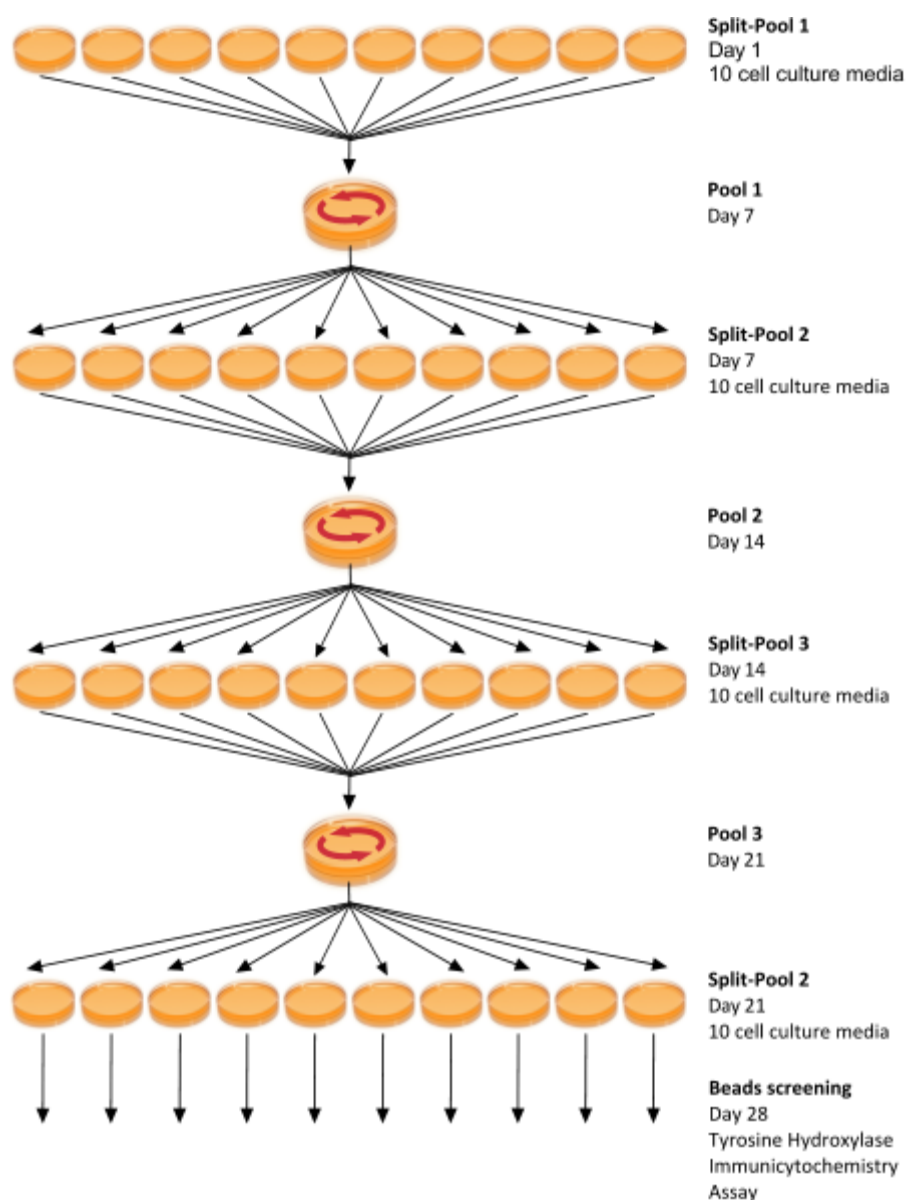

## 2. STUDY SETUP

### OVERVIEW

|                           |                            |
|---------------------------|----------------------------|
| Study title:              | mES neuronal experiment #1 |
| Study start/finish dates: | 03-March-10/20-April-10    |

### SPLIT-POOL EXPERIMENT

|                                                   |                                              |
|---------------------------------------------------|----------------------------------------------|
| Scientist Name:                                   | Dr Diana Hernandez                           |
| Start/Finish Dates:                               | 03-Mar-10/31-Mar-10                          |
| Cell Line:                                        | mESC 46C Sox1-GFP cells (Stem Cell Sciences) |
| Split 1 Date:                                     | 04-Mar-10 (Day1)                             |
| Split 2 Date:                                     | 10-Mar-10 (Day 7)                            |
| Split 3 Date:                                     | 17-Mar-10 (Day 14 )                          |
| Split 4 Date:                                     | 24-Mar -10 (Day 21)                          |
| Differentiation end Date:                         | 31-Mar-10 (Day 28)                           |
| Tagging Date - Split 1:                           | 09-Mar-10                                    |
| Tagging Date - Split 2:                           | 12-Mar-10                                    |
| Tagging Date - Split 3:                           | 17-Mar-10                                    |
| Tagging Date - Split 4:                           | N/A                                          |
| Number of cell culture media combinations tested: | 10,000                                       |
| Ratio of beads to complexity:                     | 48:1                                         |
| Total number of beads:                            | 480,000                                      |
| Ratio of cells to beads during seeding:           | 30:1                                         |
| Additional notes:                                 | None                                         |

### BEAD SCREENING & SORTING

|                              |                                                                        |
|------------------------------|------------------------------------------------------------------------|
| Scientist name:              | Dr Diana Hernandez                                                     |
| Start/finish dates:          | 31-Mar-10/20-Apr-10                                                    |
| Screening assay:             | Rb Anti-TH antibody (Millipore) + Alexa Fluor 594 anti-Rb (Invitrogen) |
| Screening date:              | 20-Apr-10                                                              |
| Flow sorting instrument:     | COPAS PLUS, Union Biometrica                                           |
| Sorting PMT channel(s):      | Red (615/45 nm) optical emission filters                               |
| Positive setup control:      | N/A                                                                    |
| Total number of sorted beads | 622                                                                    |
| Number of verified hits      | 622                                                                    |
| Additional notes:            | None                                                                   |



## TAG DECONVOLUTION

### **Bead Digestion**

Scientist name: Dr Christopher Johnson  
Start/finish dates: 21-May-10/18-Jul-11  
Additional notes: None

### **Tag Analysis**

Scientist name: Dr Christopher Johnson  
Start/finish dates: 26-May-10/22-Jul-10  
Tag analysis flow cytometry instrument: BD FACSCanto II  
Analysis PMT channel(s) optical filter: 710/50 nm band pass  
Number of analysis sessions: 21  
Additional notes: None

## PROTOCOL ANALYSIS & REPORT GENERATION

Software: Ariadne™ version 1.0  
User name: Dr Christopher Johnson  
Date, Time: 24-Jun-11, 16.00

### 3. SPLIT-POOL EXPERIMENT

#### 3.1 Cell Culture Media

**Table 2:** Compositions of the cell culture media tested in this study.

| Split | Medium ID | Basal Media      | Supplements                                                                                                                 |
|-------|-----------|------------------|-----------------------------------------------------------------------------------------------------------------------------|
| 1     | 1         | KO DMEM          | 15% FBS, 2mM Glutamine, 0.1mM $\beta$ -mercaptoethanol, 1X NEAA, 1000 Units/mL LIF(standard growth media for mES cells),    |
| 1     | 2         | DMEM             | 10% FBS, 2mM Glutamine, 1X NEAA                                                                                             |
| 1     | 3         | Advanced DMEM    | 2mM Glutamine                                                                                                               |
| 1     | 4         | DMEM/F12         | 2mM Glutamine,1% BSA, 1X N2 suppl., 1X B27 neuromix.                                                                        |
| 1     | 5         | RHB-A            |                                                                                                                             |
| 1     | 6         | KO DMEM          | 10% KSR, 2mM Glutamine                                                                                                      |
| 1     | 7         | DMEM/F12         | 2mM Glutamine, 1% BSA, 1X ITS suppl., 20ng/mL bFGF                                                                          |
| 1     | 8         | DMEM/F12         | 2mM Glutamine,1% BSA, 1X N2 suppl., 100ng/mL mr Noggin.                                                                     |
| 1     | 9         | DMEM/F12         | 2mM Glutamine, 1% BSA, 1X N2 suppl., 20 $\mu$ M SB431542.                                                                   |
| 1     | 10        | DMEM/F12         | 2mM Glutamine, 1% BSA, 1X ITS suppl., 0.5 $\mu$ M retinoic acid.                                                            |
| 2     | 1         | DMEM/F12         | 2mM Glutamine, 1X ITS suppl., 5 $\mu$ g/mL fibronectin.                                                                     |
| 2     | 2         | DMEM/F12         | 2mM Glutamine, 1X ITS suppl., 100ng/mL mr Noggin.                                                                           |
| 2     | 3         | DMEM/F12         | 2mM Glutamine, 1X ITS suppl., 20ng/mL bFGF.                                                                                 |
| 2     | 4         | DMEM/F12         | 2mM Glutamine, 1X ITS suppl., 0.5 $\mu$ M retinoic acid.                                                                    |
| 2     | 5         | RHB-A            |                                                                                                                             |
| 2     | 6         | KO DMEM          | 10% KSR, 2mM Glutamine                                                                                                      |
| 2     | 7         | DMEM/F12         | 2mM Glutamine, 1X ITS suppl., 1X B27 neuromix, 20ng/mL bFGF, 50ng/mL mr Dkk1                                                |
| 2     | 8         | Advanced DMEM    | 2mM Glutamine                                                                                                               |
| 2     | 9         | DMEM/F12         | 2mM Glutamine, 1X ITS suppl., 100ng/mL FGF8b, 500ng/mL mrShh.                                                               |
| 2     | 10        | DMEM/F12         | 2mM Glutamine, 1X ITS suppl., 200 $\mu$ M ascorbic acid, 20ng/mL bFGF, 10ng/mL BDNF 100ng/mL FGF8b, 1 $\mu$ M purmorphamine |
| 3     | 1         | DMEM/F12         | 2mM Glutamine, 1X ITS suppl., 20ng/mL bFGF.                                                                                 |
| 3     | 2         | DMEM/F12         | 2mM Glutamine, 1X ITS suppl., 20ng/mL bFGF, 1 $\mu$ g/mL laminin                                                            |
| 3     | 3         | DMEM/F12         | 2mM Glutamine, 1X N2 suppl., 1mg/mL laminin, 100ng/mL FGF8b, 500ng/mL mrShh,                                                |
| 3     | 4         | Neurobasal media | 2mM Glutamine, 1 X ITS suppl., 1mg/mL laminin, 200 $\mu$ M ascorbic acid, 10ng/mL BDNF, 10ng/mL GDNF,                       |
| 3     | 5         | RHB-A            |                                                                                                                             |
| 3     | 6         | KO DMEM          | 10% KSR, 2mM Glutamine                                                                                                      |
| 3     | 7         | DMEM/F12         | 2mM Glutamine, 1X ITS suppl., 1X B27 suppl., 50ng/mL mr Dkk1                                                                |
| 3     | 8         | Neurobasal media | 2mM Glutamine, 1X B27 neuromix., 20ng/mL bFGF                                                                               |
| 3     | 9         | Advanced DMEM    | 2mM Glutamine                                                                                                               |
| 3     | 10        | DMEM/F12         | 2mM Glutamine, 1X N2 suppl., 20ng/mL bFGF, 20ng/mL EGF, 2ng/mL LIF.                                                         |
| 4     | 1         | DMEM/F12         | 2mM Glutamine, 1X N2 suppl. , 200 $\mu$ M ascorbic acid, 1mg/mL laminin                                                     |
| 4     | 2         | DMEM/F12         | 2mM Glutamine, 0.5% FBS, 1X N2 suppl., 20ng/mL hr GDNF, 20ng/mL hr BDNF                                                     |

| Split | Medium ID | Basal Media      | Supplements                                                       |
|-------|-----------|------------------|-------------------------------------------------------------------|
| 4     | 3         | DMEM/F12         | 2mM Glutamine, 1X N2 suppl., 200µM ascorbic acid, 20ng/mL hr BDNF |
| 4     | 4         | DMEM/F12         | 2mM Glutamine, 1X ITS suppl., 0.5µM cAMP, 10ng/mL hrBDNF          |
| 4     | 5         | RHB-A            |                                                                   |
| 4     | 6         | KO DMEM          | 10% KSR, 2mM Glutamine                                            |
| 4     | 7         | Neurobasal media | 2mM Glutamine, 1XB27 neuromix.                                    |
| 4     | 8         | DMEM/F12         | 2mM Glutamine, 1X ITS suppl., 20ng/mL bFGF.                       |
| 4     | 9         | Advanced DMEM    | 2mM Glutamine                                                     |
| 4     | 10        | DMEM/F12         | 2mM Glutamine, 1X ITS suppl., 10ng/mL NT3                         |

### 3. SPLIT-POOL

#### 3.1 CELL CULTURE MEDIA CONTINUED

**Table 3:** Suppliers of basal media and supplements.

| Basal Media/Supplement | Supplier          | Product Reference |
|------------------------|-------------------|-------------------|
| Advanced DMEM          | Life Technologies | 12491-015         |
| DMEM/F12               | Life Technologies | 21041-025         |
| FBS                    | SLI               | EU-000-F          |
| Glutamine              | Life Technologies | 25030-024         |
| NEAA                   | Life Technologies | 11140035          |
| β-mercaptoethanol      | Sigma Aldrich     | M7522             |
| KO DMEM                | Life Technologies | 10829-018         |
| KSR                    | Life Technologies | 10828-028         |
| Neurobasal             | Life Technologies | 21103-049         |
| RHB-A                  | Stem Cells Inc.   | SCS-SF-NB-01      |
| Ascorbic Acid          | Sigma Aldrich     | A4403             |
| B27 Neuromix           | PAA               | F01-002           |
| BSA                    | Life Technologies | A10008-01         |
| DKK-1                  | R and D Systems   | 1765-DK-010       |
| EGF                    | R and D Systems   | 2028-EG-200       |
| FGF-8b                 | R and D Systems   | 423-F8-025        |
| bFGF                   | R and D Systems   | 233-FB-025        |
| Fibronectin            | R and D Systems   | 1918-FN-02M       |
| ITS                    | Sigma Aldrich     | I3146             |
| LIF-ESGRO              | Millipore         | ESG1106           |
| N2 Supplement          | PAA               | F005-004          |
| Noggin                 | R and D Systems   | 719-NG-050        |
| SB431542               | Sigma Aldrich     | S4317             |
| Retinoic Acid          | Sigma Aldrich     | R2625             |
| SHH                    | R and D Systems   | 461-SH-025        |
| TGF-β1                 | R and D Systems   | 4114-TC-01M       |
| Purmorphamine          | Calbiochem        | 540220            |
| BDNF                   | R and D Systems   | 248-BD-005        |
| GDNF                   | R and D Systems   | 212-GD-010        |
| Laminin                | Sigma Aldrich     | L2020             |
| cAMP                   | Sigma Aldrich     | A9501             |
| NT3                    | R and D Systems   | 267-N3-005        |

### 3. SPLIT-POOL

#### 3.2. TAG ASSIGNMENT

Each cell culture medium (except media in the last split-pool cycle) was spiked with a unique fluorescent tag that attaches to PTC5000 beads. Tag readout from individual beads enables determination of the series of cell culture media to which the bead was exposed. Thirty unique populations of tags were used, which differ in diameter and fluorescence intensity (ten gradations). Table 4 shows the tag code, size, fluorescence colour, fluorescence intensity, sample lot number, tag stock solution concentration and volume used, to spike each cell culture medium.

**Table 4:** The tags used to spike different cell culture media.

| Split | Medium ID | Tag code | Tag size | Tag fluorescence colour | Tag fluorescence intensity level | Stock solution concentration (% w/v) | V of stock solution added to media (μL) |
|-------|-----------|----------|----------|-------------------------|----------------------------------|--------------------------------------|-----------------------------------------|
| 1     | 1         | MR01     | Medium   | Red                     | 1                                | 0.5                                  | 220                                     |
| 1     | 2         | MR02     | Medium   | Red                     | 2                                | 0.5                                  | 220                                     |
| 1     | 3         | MR03     | Medium   | Red                     | 3                                | 0.5                                  | 220                                     |
| 1     | 4         | MR04     | Medium   | Red                     | 4                                | 0.5                                  | 220                                     |
| 1     | 5         | MR05     | Medium   | Red                     | 5                                | 0.5                                  | 220                                     |
| 1     | 6         | MR06     | Medium   | Red                     | 6                                | 0.5                                  | 220                                     |
| 1     | 7         | MR07     | Medium   | Red                     | 7                                | 0.5                                  | 220                                     |
| 1     | 8         | MR08     | Medium   | Red                     | 8                                | 0.5                                  | 220                                     |
| 1     | 9         | MR09     | Medium   | Red                     | 9                                | 0.5                                  | 220                                     |
| 1     | 10        | MR10     | Medium   | Red                     | 10                               | 0.5                                  | 220                                     |
| 2     | 1         | SR01     | Small    | Red                     | 1                                | 0.5                                  | 111                                     |
| 2     | 2         | SR02     | Small    | Red                     | 2                                | 0.5                                  | 111                                     |
| 2     | 3         | SR03     | Small    | Red                     | 3                                | 0.5                                  | 111                                     |
| 2     | 4         | SR04     | Small    | Red                     | 4                                | 0.5                                  | 111                                     |
| 2     | 5         | SR05     | Small    | Red                     | 5                                | 0.5                                  | 111                                     |
| 2     | 6         | SR06     | Small    | Red                     | 6                                | 0.5                                  | 111                                     |
| 2     | 7         | SR07     | Small    | Red                     | 7                                | 0.5                                  | 111                                     |
| 2     | 8         | SR08     | Small    | Red                     | 8                                | 0.5                                  | 111                                     |
| 2     | 9         | SR09     | Small    | Red                     | 9                                | 0.5                                  | 111                                     |
| 2     | 10        | SR10     | Small    | Red                     | 10                               | 0.5                                  | 111                                     |
| 3     | 1         | LR01     | Large    | Red                     | 1                                | 0.5                                  | 440                                     |
| 3     | 2         | LR02     | Large    | Red                     | 2                                | 0.5                                  | 440                                     |
| 3     | 3         | LR03     | Large    | Red                     | 3                                | 0.5                                  | 440                                     |
| 3     | 4         | LR04     | Large    | Red                     | 4                                | 0.5                                  | 440                                     |
| 3     | 5         | LR05     | Large    | Red                     | 5                                | 0.5                                  | 440                                     |
| 3     | 6         | LR06     | Large    | Red                     | 6                                | 0.5                                  | 440                                     |
| 3     | 7         | LR07     | Large    | Red                     | 7                                | 0.5                                  | 440                                     |
| 3     | 8         | LR08     | Large    | Red                     | 8                                | 0.5                                  | 440                                     |
| 3     | 9         | LR09     | Large    | Red                     | 9                                | 0.5                                  | 440                                     |
| 3     | 10        | LR10     | Large    | Red                     | 10                               | 0.5                                  | 440                                     |
| 4     | 1         | No tag   | -        | -                       | -                                | -                                    | -                                       |
| 4     | 2         | No tag   | -        | -                       | -                                | -                                    | -                                       |
| 4     | 3         | No tag   | -        | -                       | -                                | -                                    | -                                       |
| 4     | 4         | No tag   | -        | -                       | -                                | -                                    | -                                       |
| 4     | 5         | No tag   | -        | -                       | -                                | -                                    | -                                       |
| 4     | 6         | No tag   | -        | -                       | -                                | -                                    | -                                       |
| 4     | 7         | No tag   | -        | -                       | -                                | -                                    | -                                       |
| 4     | 8         | No tag   | -        | -                       | -                                | -                                    | -                                       |
| 4     | 9         | No tag   | -        | -                       | -                                | -                                    | -                                       |
| 4     | 10        | No tag   | -        | -                       | -                                | -                                    | -                                       |

## 4. BEAD SCREENING

### 4.1. SCREENING ASSAY

Following completion of the split-pool experiment at day 28, beads were screened using an immunocytochemistry assay for the enzyme tyrosine hydroxylase to identify hits populated with 46C mES cells which had differentiated into dopaminergic neurons.

In brief, beads were washed in DPBS, fixed in 4% paraformaldehyde, permeabilised with 0.25% Triton X-100 in DPBS for 20min at 25°C. Following permeabilisation, cells were incubated in blocking solution (0.25% Triton, 1% BSA in DPBS) for 30 min at 25°C and then incubated in the appropriate primary antibody diluted in blocking solution at 4°C overnight. Following primary antibody incubation, beads were washed three times in DPBS++, incubated in secondary antibody solution for two hours at 25°C, then washed three times in DPBS++ and resuspended in PBS before being sorted. Antibodies used: primary: Rb anti-tyrosine hydroxylase (Millipore), Secondary: Alexa Fluor 594 goat anti-rabbit IgG.

**Figure 3:** Shows a 'hit' in a background of negative beads (10x objective lens, scale bar = 100 µm). The image was obtained using a Nikon Eclipse TE2000-S fluorescent microscope with a TRITC filter (excitation 540/25 nm, emission 605/55 nm).

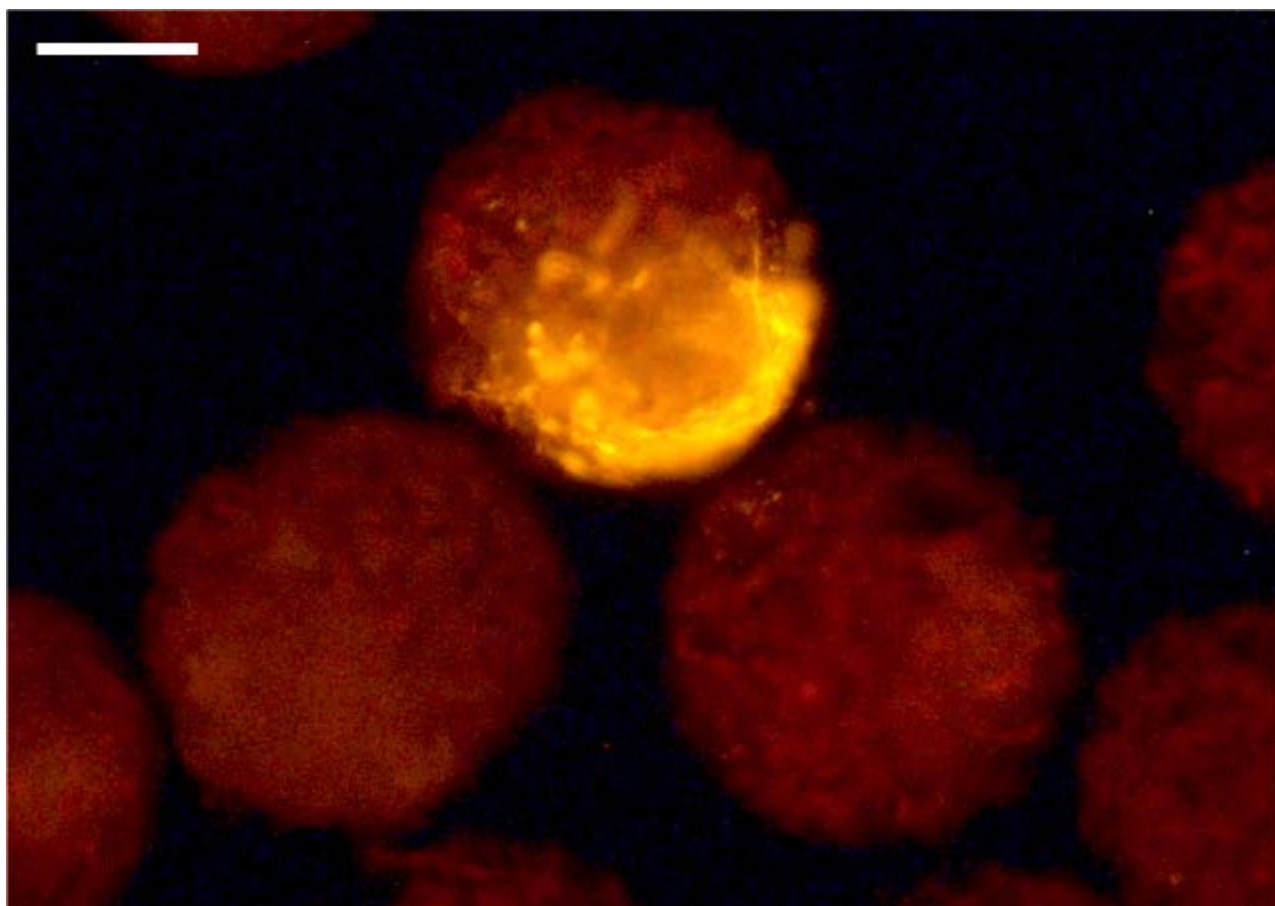



## 4. BEAD SCREENING

### 4.2. FLOW SORTING OF 'HIT' BEADS

Following the screening assay, beads were sorted using a large particle flow sorter (COPAS PLUS, Union Biometrica; Red PMT 615/45 nm optical emission filters). Beads from each final cell culture medium were labeled as bin 1-10. The data from each bin is contained in one or more flow sorting data files. Annex 1 shows dot plots from each flow sorting data file.

Beads were gated according to size (time of flight [TOF] and optical extinction [ext] values) to exclude bead aggregates that had formed during cell culture. Gated beads were sorted based on their fluorescence properties, as defined by the screening assay, and hits individually dispensed into wells of a 96-well plate.

In figure 4 COPAS data from all bins have been combined on two dot-plots to provide an overview of bead sorting. Figure 4(a) is a dot plot of time of Flight (TOF) vs. optical extinction (ext). Events falling within the gate defining monomeric beads are represented in red: in this experiment 175,062 beads (36.5 % of the starting number) were sorted. Figure 4(b) is a dot plot of TOF vs. red fluorescence intensity for all sorted beads. Beads with a red fluorescence intensity value above the threshold value (depicted as green dots in Figure 4b) were individually dispensed into 96 well plates.

Once dispensed, hits were verified by fluorescence microscopy. Table 5 lists the number of positive beads sorted and verified as 'hit' beads from each bin. A total of 622 positive beads were isolated all of which were verified as 'hit' beads (Table 5). Tags from the verified 'hits' were subsequently analysed to determine the cell culture history (i.e. differentiation protocol) of each 'hit' bead, as detailed in the next section of the report.

**Figure 4(a) and (b):** COPAS dot plots, showing (a) the gate used to select monomeric beads (red dots) and (b) the threshold fluorescence intensity used to select positive 'hit' beads (green dots). The dot plots contain combined data recorded from all bins.

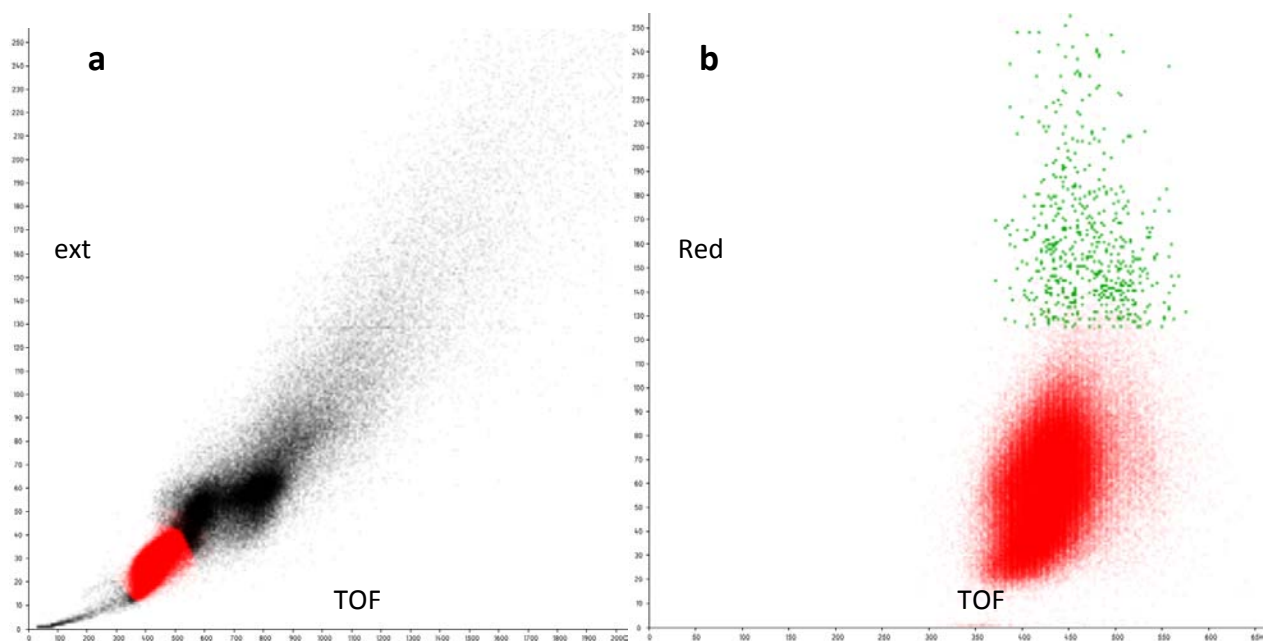

## 4. BEAD SCREENING

### 4.2. FLOW SORTING OF 'HITS' CONTINUED

**Table 5:** Number of positive beads sorted, number of verified 'hits' from each bin.

| Bin Number                      | 1   | 2  | 3  | 4  | 5  | 6  | 7  | 8  | 9   | 10 | Total |
|---------------------------------|-----|----|----|----|----|----|----|----|-----|----|-------|
| Number of positive beads sorted | 222 | 80 | 23 | 45 | 77 | 11 | 20 | 21 | 106 | 17 | 622   |
| Number of verified 'hits'       | 222 | 80 | 23 | 45 | 77 | 11 | 20 | 21 | 106 | 17 | 622   |

## 5. TAG DECONVOLUTION

Following bead sorting, tags from each hit are analysed by flow cytometry and related to the cell culture history. During this process, data is lost or excluded owing to various factors and this is summarized in Table 6.

The flow cytometry data acquisition was performed in a series of sessions and prior to each session a reference tag set was run to calibrate side/forward scatter and fluorescence intensity gates. Dot plots and histograms for each session are shown in Annex 2. The data was loaded into Ariadne™ which automatically identifies tags based on four unique parameter values (forward and side scatter and fluorescence colour and intensity).

Determination of tag identity is based on the number of events ( $\geq 3$ ) within a gate, and the cluster tightness (Table 7). If two or more clusters of events are identified which mapped to cell media from the same split and/or the signal to noise ratio was too low, an accurate identification is not recorded.

Ariadne™ relates the tag identity to a cell culture medium using the tag assignment (Table 4), allowing it to log the cell culture history of each hit (Table 8).

**Table 6:** Summary of data attrition owing to various factors.

| Bin Number                                                   | 1    | 2    | 3   | 4   | 5    | 6   | 7   | 8   | 9    | 10  | Total |
|--------------------------------------------------------------|------|------|-----|-----|------|-----|-----|-----|------|-----|-------|
| Number of verified 'hits'                                    | 222  | 80   | 23  | 45  | 77   | 11  | 20  | 21  | 106  | 17  | 622   |
| Number of beads lost during digestion and sample preparation | (38) | (5)  | (1) | (1) | (24) | (2) | (2) | 0   | (8)  | (2) | (83)  |
| Number of beads analysed by flow cytometry                   | 184  | 75   | 22  | 44  | 53   | 9   | 18  | 21  | 98   | 15  | 539   |
| Number of beads with no tagging data                         | (6)  | 0    | 0   | 0   | (1)  | (2) | (1) | (3) | (8)  | (1) | (22)  |
| Number of beads with incomplete tagging data                 | (17) | (4)  | (3) | (7) | (3)  | 0   | 0   | 0   | (1)  | (4) | (39)  |
| Number of beads containing too many tag clusters             | (30) | (11) | (1) | (8) | (8)  | 0   | (2) | (5) | (14) | 0   | (79)  |
| Number of hits with conclusive tagging data                  | 131  | 60   | 18  | 29  | 41   | 7   | 15  | 13  | 75   | 10  | 399   |

**Table 7:** Summary of the minimum, maximum and average number of tags derived from beads in each of the cell culture media. This data demonstrates that the average number of tags for all media is well above the minimum required to link a cell culture medium to a bead (3), and only seven media were identified using the minimum number of tags.

| Split | Medium ID | # of 'hit' beads per media | Minimum # of tags | Average # of tags | Maximum # of tags |
|-------|-----------|----------------------------|-------------------|-------------------|-------------------|
| 1     | 1         | 47                         | 4                 | 16                | 106               |
| 1     | 2         | 35                         | 19                | 80                | 205               |
| 1     | 3         | 41                         | 20                | 100               | 402               |
| 1     | 4         | 35                         | 24                | 117               | 242               |
| 1     | 5         | 54                         | 7                 | 34                | 86                |
| 1     | 6         | 37                         | 10                | 76                | 237               |
| 1     | 7         | 38                         | 23                | 86                | 183               |
| 1     | 8         | 30                         | 19                | 80                | 177               |
| 1     | 9         | 38                         | 7                 | 92                | 282               |
| 1     | 10        | 44                         | 16                | 106               | 246               |
|       |           |                            |                   |                   |                   |
| 2     | 1         | 22                         | 7                 | 37                | 117               |
| 2     | 2         | 27                         | 6                 | 29                | 96                |
| 2     | 3         | 25                         | 10                | 40                | 91                |
| 2     | 4         | 32                         | 6                 | 32                | 115               |
| 2     | 5         | 61                         | 4                 | 56                | 178               |
| 2     | 6         | 54                         | 4                 | 50                | 147               |
| 2     | 7         | 31                         | 8                 | 59                | 177               |
| 2     | 8         | 32                         | 9                 | 27                | 86                |
| 2     | 9         | 60                         | 15                | 81                | 234               |
| 2     | 10        | 55                         | 11                | 83                | 215               |
|       |           |                            |                   |                   |                   |
| 3     | 1         | 49                         | 5                 | 31                | 129               |
| 3     | 2         | 51                         | 4                 | 47                | 242               |
| 3     | 3         | 39                         | 7                 | 42                | 170               |
| 3     | 4         | 17                         | 6                 | 63                | 223               |
| 3     | 5         | 46                         | 4                 | 59                | 204               |
| 3     | 6         | 40                         | 4                 | 84                | 279               |
| 3     | 7         | 40                         | 5                 | 70                | 411               |
| 3     | 8         | 22                         | 19                | 56                | 118               |
| 3     | 9         | 53                         | 7                 | 49                | 230               |
| 3     | 10        | 42                         | 5                 | 43                | 157               |
|       |           |                            |                   |                   |                   |
| 4     | 1         | 132                        | No tag            | -                 | -                 |
| 4     | 2         | 60                         | No tag            | -                 | -                 |
| 4     | 3         | 18                         | No tag            | -                 | -                 |
| 4     | 4         | 29                         | No tag            | -                 | -                 |
| 4     | 5         | 41                         | No tag            | -                 | -                 |
| 4     | 6         | 7                          | No tag            | -                 | -                 |
| 4     | 7         | 15                         | No tag            | -                 | -                 |
| 4     | 8         | 13                         | No tag            | -                 | -                 |
| 4     | 9         | 75                         | No tag            | -                 | -                 |
| 4     | 10        | 10                         | No tag            | -                 | -                 |

**Table 8:** Information for each ‘hit’: i) the bead ID; ii) tag acquisition session number; iii) flow cytometry tag data file name; iv) series of cell culture media, i.e. protocol (number of tags upon which assignment of each cell culture media is based are in parentheses, “–” represents unreadable tag data) and v) whether the bead passes the tag deconvolution.

| Bead ID | Tag acquisition session # | Tag data filename   | Split 1 media (# of tags) | Split 2 media (# of tags) | Split 3 media (# of tags) | Split 4 media | Pass tag deconvolution criteria |
|---------|---------------------------|---------------------|---------------------------|---------------------------|---------------------------|---------------|---------------------------------|
| 1       | 1                         | Bin1_plateA0_H3.fcs | 9 (282)                   | 9 (175)                   | 5 (109)                   | 1             | pass                            |
| 2       | 1                         | Bin1_plateA0_A2.fcs | 8 (72)                    | -                         | 10 (26)                   | 1             | fail                            |
| 3       | 1                         | Bin1_plateA0_A3.fcs | 9 (37)                    | -                         | 6 (43)                    | 1             | fail                            |
| 4       | 1                         | Bin1_plateA0_B1.fcs | 4 (159)                   | 9 (28)                    | 9 (47)                    | 1             | pass                            |
| 5       | 1                         | Bin1_plateA0_B2.fcs | 7 (99)                    | 6 (131)                   | 7 (88)                    | 1             | pass                            |
| 6       | 1                         | Bin1_plateA0_B3.fcs | 10 (111)                  | 4 (23)                    | 4 (121)                   | 1             | pass                            |
| 7       | 1                         | Bin1_plateA0_C1.fcs | 7 (51)                    | 10 (74)                   | 2 (20)                    | 1             | pass                            |
| 8       | 1                         | Bin1_plateA0_C2.fcs | 6 (112)                   | 8 (36)                    | 1 (129)                   | 1             | pass                            |
| 9       | 1                         | Bin1_plateA0_C3.fcs | 3 (127)                   | 6 (147)                   | 3 (82)                    | 1             | pass                            |
| 10      | 1                         | Bin1_plateA0_D1.fcs | 8 (177)                   | 2 (29)                    | 2 (34)                    | 1             | pass                            |
| 11      | 1                         | Bin1_plateA0_D2.fcs | 1 (32)                    | -                         | 2 (52)                    | 1             | fail                            |
| 12      | 1                         | Bin1_plateA0_D3.fcs | 2 (72)                    | 5 (51)                    | 4 (65)                    | 1             | pass                            |
| 13      | 1                         | Bin1_plateA0_E1.fcs | 10 (89)                   | 8 (11)                    | 2 (81)                    | 1             | pass                            |
| 14      | 1                         | Bin1_plateA0_E2.fcs | 3 (184)                   | 7 (177)                   | 3 (44)                    | 1             | pass                            |
| 15      | 1                         | Bin1_plateA0_E3.fcs | 1 (20)                    | -                         | 4 (85)                    | 1             | fail                            |
| 16      | 1                         | Bin1_plateA0_F1.fcs | 5 (74)                    | -                         | 5 (248)                   | 1             | fail                            |
| 17      | 1                         | Bin1_plateA0_F2.fcs | 10 (165)                  | 10 (215)                  | 5 (49)                    | 1             | pass                            |
| 18      | 1                         | Bin1_plateA0_F3.fcs | 4 (173)                   | 6 (90)                    | 9 (155)                   | 1             | pass                            |
| 19      | 1                         | Bin1_plateA0_G1.fcs | 7 (76)                    | 2 (7)                     | 10 (42)                   | 1             | pass                            |
| 20      | 1                         | Bin1_plateA0_G2.fcs | -                         | -                         | 1 (20)                    | 1             | fail                            |
| 21      | 1                         | Bin1_plateA0_G3.fcs | 9 (108)                   | 4 (105)                   | 2 (13)                    | 1             | pass                            |
| 22      | 1                         | Bin1_plateA0_H1.fcs | 1 (8)                     | -                         | 8 (44)                    | 1             | fail                            |
| 23      | 1                         | Bin1_plateA0_H2.fcs | 1 (106)                   | 8 (86)                    | 9 (57)                    | 1             | pass                            |
| 24      | 2                         | Bin1_plateA0_H6.fcs | 6 (10)                    | 7 (12)                    | 6 (18)                    | 1             | pass                            |
| 25      | 2                         | Bin1_plateA0_A4.fcs | 9 (128)                   | 7 (58)                    | 5 (22)                    | 1             | pass                            |
| 26      | 2                         | Bin1_plateA0_A5.fcs | 5 (25)                    | 9 (42)                    | 9 (19)                    | 1             | pass                            |
| 27      | 2                         | Bin1_plateA0_A6.fcs | 10 (121)                  | 7 (97)                    | 5 (76)                    | 1             | pass                            |
| 28      | 2                         | Bin1_plateA0_A7.fcs | 6 (236)                   | 1 (54)                    | 9 (29)                    | 1             | pass                            |
| 29      | 2                         | Bin1_plateA0_B4.fcs | 10 (216)                  | 7 (33)                    | 9 (41)                    | 1             | pass                            |
| 30      | 2                         | Bin1_plateA0_B5.fcs | -                         | -                         | 1 (15)                    | 1             | fail                            |
| 31      | 2                         | Bin1_plateA0_B6.fcs | 9 (20)                    | -                         | -                         | 1             | fail                            |
| 32      | 2                         | Bin1_plateA0_B7.fcs | 10 (118)                  | 6 (55)                    | 7 (203)                   | 1             | pass                            |
| 33      | 2                         | Bin1_plateA0_C4.fcs | 1 (11)                    | 3 (11)                    | -                         | 1             | fail                            |
| 34      | 2                         | Bin1_plateA0_C5.fcs | 6 (90)                    | 10 (83)                   | 6 (83)                    | 1             | pass                            |
| 35      | 2                         | Bin1_plateA0_C6.fcs | 5 (85)                    | 2 (55)                    | 7 (169)                   | 1             | pass                            |
| 36      | 2                         | Bin1_plateA0_C7.fcs | 1 (12)                    | 10 (148)                  | 5 (29)                    | 1             | pass                            |
| 37      | 2                         | Bin1_plateA0_D4.fcs | 4 (96)                    | 6 (29)                    | 2 (47)                    | 1             | pass                            |
| 38      | 2                         | Bin1_plateA0_D5.fcs | 8 (90)                    | 10 (27)                   | 8 (118)                   | 1             | pass                            |
| 39      | 2                         | Bin1_plateA0_D6.fcs | -                         | -                         | 2 (62)                    | 1             | fail                            |
| 40      | 2                         | Bin1_plateA0_D7.fcs | 5 (44)                    | 4 (39)                    | 5 (46)                    | 1             | pass                            |

| Bead ID | Tag acquisition session # | Tag data filename    | Split 1 media (# of tags) | Split 2 media (# of tags) | Split 3 media (# of tags) | Split 4 media | Pass tag deconvolution criteria |
|---------|---------------------------|----------------------|---------------------------|---------------------------|---------------------------|---------------|---------------------------------|
| 41      | 2                         | Bin1_plateA0_E4.fcs  | -                         | -                         | -                         | 1             | fail                            |
| 42      | 2                         | Bin1_plateA0_E5.fcs  | 2 (115)                   | 1 (42)                    | 5 (132)                   | 1             | pass                            |
| 43      | 2                         | Bin1_plateA0_E6.fcs  | -                         | -                         | -                         | 1             | fail                            |
| 44      | 2                         | Bin1_plateA0_F5.fcs  | -                         | 4 (31)                    | 10 (53)                   | 1             | fail                            |
| 45      | 2                         | Bin1_plateA0_F6.fcs  | 1 (15)                    | 3 (13)                    | 6 (67)                    | 1             | pass                            |
| 46      | 2                         | Bin1_plateA0_G4.fcs  | 5 (50)                    | 10 (33)                   | 5 (74)                    | 1             | pass                            |
| 47      | 2                         | Bin1_plateA0_G5.fcs  | 1 (41)                    | 10 (188)                  | -                         | 1             | fail                            |
| 48      | 2                         | Bin1_plateA0_G6.fcs  | 3 (94)                    | 1 (22)                    | 10 (22)                   | 1             | pass                            |
| 49      | 2                         | Bin1_plateA0_H4.fcs  | -                         | -                         | 9 (338)                   | 1             | fail                            |
| 50      | 2                         | Bin1_plateA0_H5.fcs  | 9 (48)                    | 5 (9)                     | 8 (72)                    | 1             | pass                            |
| 51      | 3                         | Bin1_plateA0_H10.fcs | 9 (87)                    | 1 (23)                    | 7 (74)                    | 1             | pass                            |
| 52      | 3                         | Bin1_plateA0_A8.fcs  | 6 (28)                    | 4 (36)                    | 7 (30)                    | 1             | pass                            |
| 53      | 3                         | Bin1_plateA0_A9.fcs  | 9 (82)                    | 3 (40)                    | 7 (56)                    | 1             | pass                            |
| 54      | 3                         | Bin1_plateA0_A10.fcs | 2 (142)                   | 5 (89)                    | 3 (15)                    | 1             | pass                            |
| 55      | 3                         | Bin1_plateA0_B8.fcs  | 9 (143)                   | 6 (63)                    | 7 (63)                    | 1             | pass                            |
| 56      | 3                         | Bin1_plateA0_B9.fcs  | 7 (70)                    | 6 (24)                    | 10 (36)                   | 1             | pass                            |
| 57      | 3                         | Bin1_plateA0_B10.fcs | 6 (29)                    | 9 (19)                    | 6 (120)                   | 1             | pass                            |
| 58      | 3                         | Bin1_plateA0_C8.fcs  | 7 (183)                   | 7 (98)                    | 2 (29)                    | 1             | pass                            |
| 59      | 3                         | Bin1_plateA0_C9.fcs  | 5 (51)                    | 3 (44)                    | -                         | 1             | fail                            |
| 60      | 3                         | Bin1_plateA0_C10.fcs | 10 (39)                   | 2 (27)                    | 3 (20)                    | 1             | pass                            |
| 61      | 3                         | Bin1_plateA0_D8.fcs  | 9 (108)                   | 2 (40)                    | 6 (26)                    | 1             | pass                            |
| 62      | 3                         | Bin1_plateA0_D9.fcs  | 6 (60)                    | 3 (83)                    | -                         | 1             | fail                            |
| 63      | 3                         | Bin1_plateA0_D10.fcs | 3 (128)                   | 8 (23)                    | 2 (40)                    | 1             | pass                            |
| 64      | 3                         | Bin1_plateA0_E7.fcs  | 10 (158)                  | 4 (40)                    | -                         | 1             | fail                            |
| 65      | 3                         | Bin1_plateA0_E8.fcs  | 5 (71)                    | 7 (17)                    | 10 (42)                   | 1             | pass                            |
| 66      | 3                         | Bin1_plateA0_E10.fcs | 1 (13)                    | 5 (28)                    | 1 (5)                     | 1             | pass                            |
| 67      | 3                         | Bin1_plateA0_F7.fcs  | 2 (146)                   | 10 (65)                   | 1 (29)                    | 1             | pass                            |
| 68      | 3                         | Bin1_plateA0_F8.fcs  | 3 (92)                    | 9 (53)                    | 1 (22)                    | 1             | pass                            |
| 69      | 3                         | Bin1_plateA0_F9.fcs  | 9 (42)                    | 10 (44)                   | 3 (28)                    | 1             | pass                            |
| 70      | 3                         | Bin1_plateA0_F10.fcs | 9 (46)                    | 9 (30)                    | 4 (23)                    | 1             | pass                            |
| 71      | 3                         | Bin1_plateA0_G7.fcs  | 5 (35)                    | 9 (130)                   | 10 (54)                   | 1             | pass                            |
| 72      | 3                         | Bin1_plateA0_G8.fcs  | -                         | 9 (21)                    | 7 (82)                    | 1             | fail                            |
| 73      | 3                         | Bin1_plateA0_G9.fcs  | 10 (114)                  | 2 (25)                    | 6 (161)                   | 1             | pass                            |
| 74      | 3                         | Bin1_plateA0_G10.fcs | 1 (11)                    | 10 (157)                  | -                         | 1             | fail                            |
| 75      | 3                         | Bin1_plateA0_H7.fcs  | 9 (139)                   | 9 (77)                    | 9 (71)                    | 1             | pass                            |
| 76      | 3                         | Bin1_plateA0_H8.fcs  | 1 (16)                    | -                         | 4 (40)                    | 1             | fail                            |
| 77      | 3                         | Bin1_plateA0_H9.fcs  | 4 (93)                    | 6 (43)                    | 7 (79)                    | 1             | pass                            |
| 78      | 4                         | Bin1_plateA0_H12.fcs | 9 (211)                   | 3 (57)                    | 10 (32)                   | 1             | pass                            |
| 79      | 4                         | Bin1_plateA0_A11.fcs | 3 (402)                   | 6 (120)                   | 1 (29)                    | 1             | pass                            |
| 80      | 4                         | Bin1_plateA0_A12.fcs | 2 (205)                   | 5 (113)                   | 9 (65)                    | 1             | pass                            |
| 81      | 4                         | Bin1_plateA0_B11.fcs | 9 (116)                   | 4 (52)                    | 6 (55)                    | 1             | pass                            |
| 82      | 4                         | Bin1_plateA0_B12.fcs | 10 (235)                  | 8 (41)                    | 10 (34)                   | 1             | pass                            |
| 83      | 4                         | Bin1_plateA0_C11.fcs | 4 (129)                   | 6 (36)                    | 6 (115)                   | 1             | pass                            |



| Bead ID | Tag acquisition session # | Tag data filename    | Split 1 media (# of tags) | Split 2 media (# of tags) | Split 3 media (# of tags) | Split 4 media | Pass tag deconvolution criteria |
|---------|---------------------------|----------------------|---------------------------|---------------------------|---------------------------|---------------|---------------------------------|
| 84      | 4                         | Bin1_plateA0_C12.fcs | 2 (90)                    | 10 (56)                   | 5 (50)                    | 1             | pass                            |
| 85      | 4                         | Bin1_plateA0_D11.fcs | 8 (117)                   | 8 (47)                    | 2 (47)                    | 1             | pass                            |
| 86      | 4                         | Bin1_plateA0_D12.fcs | 1 (27)                    | 6 (7)                     | 2 (6)                     | 1             | pass                            |
| 87      | 4                         | Bin1_plateA0_E11.fcs | 6 (74)                    | 3 (66)                    | 7 (55)                    | 1             | pass                            |
| 88      | 4                         | Bin1_plateA0_E12.fcs | 8 (153)                   | 7 (156)                   | 10 (71)                   | 1             | pass                            |
| 89      | 4                         | Bin1_plateA0_F11.fcs | 3 (173)                   | 9 (86)                    | 3 (38)                    | 1             | pass                            |
| 90      | 4                         | Bin1_plateA0_F12.fcs | 6 (103)                   | 3 (54)                    | 9 (46)                    | 1             | pass                            |
| 91      | 4                         | Bin1_plateA0_G11.fcs | 4 (133)                   | 10 (59)                   | 4 (81)                    | 1             | pass                            |
| 92      | 4                         | Bin1_plateA0_G12.fcs | 1 (27)                    | -                         | 4 (227)                   | 1             | fail                            |
| 93      | 4                         | Bin1_plateA0_H11.fcs | 9 (94)                    | 8 (66)                    | 8 (106)                   | 1             | pass                            |
| 94      | 5                         | Bin1_plateB1_H7.fcs  | 9 (52)                    | -                         | 6 (13)                    | 1             | fail                            |
| 95      | 5                         | Bin1_plateB1_A1.fcs  | 9 (119)                   | 7 (55)                    | 3 (41)                    | 1             | pass                            |
| 96      | 5                         | Bin1_plateB1_A6.fcs  | 10 (47)                   | 10 (39)                   | 7 (25)                    | 1             | pass                            |
| 97      | 5                         | Bin1_plateB1_A7.fcs  | 10 (133)                  | 8 (28)                    | 1 (16)                    | 1             | pass                            |
| 98      | 5                         | Bin1_plateB1_B1.fcs  | 10 (83)                   | 5 (31)                    | 8 (49)                    | 1             | pass                            |
| 99      | 5                         | Bin1_plateB1_B2.fcs  | 7 (100)                   | -                         | 7 (92)                    | 1             | fail                            |
| 100     | 5                         | Bin1_plateB1_B3.fcs  | -                         | -                         | -                         | 1             | fail                            |
| 101     | 5                         | Bin1_plateB1_B4.fcs  | 1 (11)                    | 5 (22)                    | 9 (15)                    | 1             | pass                            |
| 102     | 5                         | Bin1_plateB1_C1.fcs  | 9 (3)                     | 5 (11)                    | -                         | 1             | fail                            |
| 103     | 5                         | Bin1_plateB1_C2.fcs  | 9 (5)                     | -                         | -                         | 1             | fail                            |
| 104     | 5                         | Bin1_plateB1_C4.fcs  | -                         | -                         | 10 (10)                   | 1             | fail                            |
| 105     | 5                         | Bin1_plateB1_C5.fcs  | -                         | -                         | 6 (57)                    | 1             | fail                            |
| 106     | 5                         | Bin1_plateB1_C6.fcs  | 9 (79)                    | 5 (20)                    | 7 (34)                    | 1             | pass                            |
| 107     | 5                         | Bin1_plateB1_C7.fcs  | -                         | -                         | 1 (4)                     | 1             | fail                            |
| 108     | 5                         | Bin1_plateB1_D1.fcs  | 9 (7)                     | 4 (11)                    | 6 (5)                     | 1             | pass                            |
| 109     | 5                         | Bin1_plateB1_D4.fcs  | 10 (31)                   | -                         | 6 (6)                     | 1             | fail                            |
| 110     | 5                         | Bin1_plateB1_D6.fcs  | 7 (76)                    | 3 (10)                    | 1 (67)                    | 1             | pass                            |
| 111     | 5                         | Bin1_plateB1_D7.fcs  | 5 (8)                     | 5 (12)                    | -                         | 1             | fail                            |
| 112     | 5                         | Bin1_plateB1_E3.fcs  | 8 (25)                    | 4 (7)                     | 7 (15)                    | 1             | pass                            |
| 113     | 5                         | Bin1_plateB1_E6.fcs  | 9 (23)                    | 2 (7)                     | 10 (13)                   | 1             | pass                            |
| 114     | 5                         | Bin1_plateB1_E7.fcs  | 4 (45)                    | 10 (70)                   | 4 (42)                    | 1             | pass                            |
| 115     | 5                         | Bin1_plateB1_F1.fcs  | -                         | -                         | -                         | 1             | fail                            |
| 116     | 5                         | Bin1_plateB1_F2.fcs  | 3 (83)                    | 10 (152)                  | 4 (32)                    | 1             | pass                            |
| 117     | 5                         | Bin1_plateB1_F4.fcs  | 10 (24)                   | 6 (15)                    | 1 (7)                     | 1             | pass                            |
| 118     | 5                         | Bin1_plateB1_F5.fcs  | 9 (28)                    | 7 (16)                    | 3 (26)                    | 1             | pass                            |
| 119     | 5                         | Bin1_plateB1_F6.fcs  | 4 (24)                    | 1 (28)                    | 2 (13)                    | 1             | pass                            |
| 120     | 5                         | Bin1_plateB1_F7.fcs  | 10 (64)                   | 2 (27)                    | 9 (46)                    | 1             | pass                            |
| 121     | 5                         | Bin1_plateB1_G2.fcs  | 5 (10)                    | 9 (34)                    | 2 (5)                     | 1             | pass                            |
| 122     | 5                         | Bin1_plateB1_G3.fcs  | 9 (90)                    | -                         | 10 (32)                   | 1             | fail                            |
| 123     | 5                         | Bin1_plateB1_G4.fcs  | -                         | -                         | -                         | 1             | fail                            |
| 124     | 5                         | Bin1_plateB1_G5.fcs  | 8 (63)                    | 10 (24)                   | 9 (7)                     | 1             | pass                            |
| 125     | 5                         | Bin1_plateB1_H1.fcs  | 1 (13)                    | 4 (10)                    | 10 (118)                  | 1             | pass                            |
| 126     | 5                         | Bin1_plateB1_H2.fcs  | 5 (16)                    | 9 (20)                    | 5 (65)                    | 1             | pass                            |

| Bead ID | Tag acquisition session # | Tag data filename    | Split 1 media (# of tags) | Split 2 media (# of tags) | Split 3 media (# of tags) | Split 4 media | Pass tag deconvolution criteria |
|---------|---------------------------|----------------------|---------------------------|---------------------------|---------------------------|---------------|---------------------------------|
| 127     | 5                         | Bin1_plateB1_H3.fcs  | 2 (49)                    | -                         | -                         | 1             | fail                            |
| 128     | 5                         | Bin1_plateB1_H4.fcs  | 6 (15)                    | 8 (15)                    | 1 (12)                    | 1             | pass                            |
| 129     | 5                         | Bin1_plateB1_H5.fcs  | 2 (38)                    | 4 (8)                     | 3 (9)                     | 1             | pass                            |
| 130     | 5                         | Bin1_plateB1_H6.fcs  | 6 (49)                    | 6 (16)                    | 10 (18)                   | 1             | pass                            |
| 131     | 6                         | Bin1_plateB1_H10.fcs | -                         | -                         | -                         | 1             | fail                            |
| 132     | 6                         | Bin1_plateB1_A10.fcs | 2 (25)                    | 7 (33)                    | 4 (6)                     | 1             | pass                            |
| 133     | 6                         | Bin1_plateB1_B8.fcs  | 10 (31)                   | -                         | -                         | 1             | fail                            |
| 134     | 6                         | Bin1_plateB1_B10.fcs | 6 (60)                    | 8 (9)                     | 1 (18)                    | 1             | pass                            |
| 135     | 6                         | Bin1_plateB1_C8.fcs  | 5 (15)                    | 9 (32)                    | 5 (36)                    | 1             | pass                            |
| 136     | 6                         | Bin1_plateB1_C9.fcs  | 1 (7)                     | 6 (40)                    | 7 (6)                     | 1             | pass                            |
| 137     | 6                         | Bin1_plateB1_D8.fcs  | 8 (3)                     | -                         | 8 (3)                     | 1             | fail                            |
| 138     | 6                         | Bin1_plateB1_D9.fcs  | -                         | 3 (42)                    | -                         | 1             | fail                            |
| 139     | 6                         | Bin1_plateB1_D10.fcs | 4 (44)                    | 6 (20)                    | 7 (5)                     | 1             | pass                            |
| 140     | 6                         | Bin1_plateB1_E8.fcs  | 5 (65)                    | 1 (14)                    | 10 (114)                  | 1             | pass                            |
| 141     | 6                         | Bin1_plateB1_E9.fcs  | 5 (14)                    | 10 (75)                   | 6 (15)                    | 1             | pass                            |
| 142     | 6                         | Bin1_plateB1_E10.fcs | 9 (56)                    | 2 (47)                    | -                         | 1             | fail                            |
| 143     | 6                         | Bin1_plateB1_F8.fcs  | -                         | 10 (53)                   | 6 (92)                    | 1             | fail                            |
| 144     | 6                         | Bin1_plateB1_F9.fcs  | -                         | -                         | -                         | 1             | fail                            |
| 145     | 6                         | Bin1_plateB1_F10.fcs | 1 (4)                     | 2 (8)                     | 10 (14)                   | 1             | pass                            |
| 146     | 6                         | Bin1_plateB1_G8.fcs  | 9 (13)                    | -                         | 6 (4)                     | 1             | fail                            |
| 147     | 6                         | Bin1_plateB1_G9.fcs  | 2 (56)                    | 3 (43)                    | 8 (21)                    | 1             | pass                            |
| 148     | 6                         | Bin1_plateB1_G10.fcs | 2 (19)                    | 4 (29)                    | 2 (11)                    | 1             | pass                            |
| 149     | 6                         | Bin1_plateB1_H8.fcs  | -                         | 4 (40)                    | 5 (421)                   | 1             | fail                            |
| 150     | 6                         | Bin1_plateB1_H9.fcs  | 4 (44)                    | 7 (25)                    | 10 (8)                    | 1             | pass                            |
| 151     | 7                         | Bin1_plateB1_H11.fcs | 4 (138)                   | 4 (25)                    | 5 (49)                    | 1             | pass                            |
| 152     | 7                         | Bin1_plateB1_A12.fcs | 7 (110)                   | 9 (212)                   | 7 (411)                   | 1             | pass                            |
| 153     | 7                         | Bin1_plateB1_B11.fcs | -                         | 6 (79)                    | 1 (48)                    | 1             | fail                            |
| 154     | 7                         | Bin1_plateB1_B12.fcs | -                         | -                         | -                         | 1             | fail                            |
| 155     | 7                         | Bin1_plateB1_C12.fcs | 8 (81)                    | 8 (17)                    | 9 (21)                    | 1             | pass                            |
| 156     | 7                         | Bin1_plateB1_F12.fcs | -                         | 3 (145)                   | 1 (35)                    | 1             | fail                            |
| 157     | 7                         | Bin1_plateB1_G11.fcs | 7 (78)                    | -                         | 4 (70)                    | 1             | fail                            |
| 158     | 8                         | Bin1_plateC2_C6.fcs  | 10 (180)                  | 5 (154)                   | 10 (36)                   | 1             | pass                            |
| 159     | 8                         | Bin1_plateC2_A1.fcs  | 3 (178)                   | 1 (28)                    | 10 (157)                  | 1             | pass                            |
| 160     | 8                         | Bin1_plateC2_A2.fcs  | 8 (131)                   | 6 (72)                    | 9 (75)                    | 1             | pass                            |
| 161     | 8                         | Bin1_plateC2_A4.fcs  | 8 (69)                    | 4 (24)                    | 8 (22)                    | 1             | pass                            |
| 162     | 8                         | Bin1_plateC2_A5.fcs  | 8 (107)                   | 10 (154)                  | 3 (30)                    | 1             | pass                            |
| 163     | 8                         | Bin1_plateC2_A6.fcs  | 6 (208)                   | 9 (162)                   | 1 (23)                    | 1             | pass                            |
| 164     | 8                         | Bin1_plateC2_A7.fcs  | 8 (106)                   | 5 (42)                    | 10 (31)                   | 1             | pass                            |
| 165     | 8                         | Bin1_plateC2_A8.fcs  | -                         | -                         | -                         | 1             | fail                            |
| 166     | 8                         | Bin1_plateC2_A9.fcs  | 1 (14)                    | 5 (70)                    | 2 (48)                    | 1             | pass                            |
| 167     | 8                         | Bin1_plateC2_A10.fcs | 5 (22)                    | 5 (15)                    | 5 (124)                   | 1             | pass                            |
| 168     | 8                         | Bin1_plateC2_A11.fcs | -                         | -                         | -                         | 1             | fail                            |
| 169     | 8                         | Bin1_plateC2_A12.fcs | 7 (60)                    | 8 (18)                    | 10 (11)                   | 1             | pass                            |

| Bead ID | Tag acquisition session # | Tag data filename    | Split 1 media (# of tags) | Split 2 media (# of tags) | Split 3 media (# of tags) | Split 4 media | Pass tag deconvolution criteria |
|---------|---------------------------|----------------------|---------------------------|---------------------------|---------------------------|---------------|---------------------------------|
| 170     | 8                         | Bin1_plateC2_B1.fcs  | 8 (19)                    | 7 (12)                    | 9 (10)                    | 1             | pass                            |
| 171     | 8                         | Bin1_plateC2_B2.fcs  | 1 (8)                     | 5 (28)                    | 2 (98)                    | 1             | pass                            |
| 172     | 8                         | Bin1_plateC2_B3.fcs  | 9 (193)                   | 10 (130)                  | 10 (49)                   | 1             | pass                            |
| 173     | 8                         | Bin1_plateC2_B4.fcs  | 5 (23)                    | 9 (19)                    | 5 (18)                    | 1             | pass                            |
| 174     | 8                         | Bin1_plateC2_B5.fcs  | 1 (4)                     | 5 (4)                     | 7 (26)                    | 1             | pass                            |
| 175     | 8                         | Bin1_plateC2_B6.fcs  | 4 (152)                   | 6 (65)                    | 5 (45)                    | 1             | pass                            |
| 176     | 8                         | Bin1_plateC2_B7.fcs  | 6 (19)                    | 7 (18)                    | 5 (17)                    | 1             | pass                            |
| 177     | 8                         | Bin1_plateC2_B8.fcs  | -                         | 5 (17)                    | 2 (71)                    | 1             | fail                            |
| 178     | 8                         | Bin1_plateC2_B9.fcs  | 4 (100)                   | 6 (37)                    | 1 (16)                    | 1             | pass                            |
| 179     | 8                         | Bin1_plateC2_B10.fcs | 6 (24)                    | 5 (29)                    | 6 (47)                    | 1             | pass                            |
| 180     | 8                         | Bin1_plateC2_B11.fcs | 5 (25)                    | 10 (115)                  | 5 (24)                    | 1             | pass                            |
| 181     | 8                         | Bin1_plateC2_B12.fcs | 1 (22)                    | 3 (62)                    | 10 (99)                   | 1             | pass                            |
| 182     | 8                         | Bin1_plateC2_C1.fcs  | 6 (29)                    | 5 (18)                    | 3 (11)                    | 1             | pass                            |
| 183     | 8                         | Bin1_plateC2_C4.fcs  | 4 (84)                    | 9 (29)                    | 5 (37)                    | 1             | pass                            |
| 184     | 8                         | Bin1_plateC2_C5.fcs  | 2 (154)                   | 9 (122)                   | 6 (66)                    | 1             | pass                            |
| 185     | 9                         | Bin2_plateA2_E8.fcs  | 3 (89)                    | 4 (39)                    | 1 (18)                    | 2             | pass                            |
| 186     | 9                         | Bin2_plateA2_A1.fcs  | 5 (40)                    | 10 (28)                   | 2 (31)                    | 2             | pass                            |
| 187     | 9                         | Bin2_plateA2_A3.fcs  | 8 (65)                    | 6 (67)                    | 5 (103)                   | 2             | pass                            |
| 188     | 9                         | Bin2_plateA2_A4.fcs  | 9 (50)                    | 4 (22)                    | 9 (17)                    | 2             | pass                            |
| 189     | 9                         | Bin2_plateA2_A5.fcs  | 4 (100)                   | 9 (72)                    | 3 (26)                    | 2             | pass                            |
| 190     | 9                         | Bin2_plateA2_A6.fcs  | 3 (101)                   | 6 (70)                    | 10 (33)                   | 2             | pass                            |
| 191     | 9                         | Bin2_plateA2_A7.fcs  | 5 (33)                    | 9 (29)                    | -                         | 2             | fail                            |
| 192     | 9                         | Bin2_plateA2_A8.fcs  | 10 (111)                  | -                         | 1 (34)                    | 2             | fail                            |
| 193     | 9                         | Bin2_plateA2_A9.fcs  | 10 (105)                  | 4 (115)                   | 4 (91)                    | 2             | pass                            |
| 194     | 9                         | Bin2_plateA2_A10.fcs | 10 (36)                   | 6 (17)                    | 9 (38)                    | 2             | pass                            |
| 195     | 9                         | Bin2_plateA2_A11.fcs | 5 (27)                    | 8 (14)                    | 9 (58)                    | 2             | pass                            |
| 196     | 9                         | Bin2_plateA2_A12.fcs | 4 (126)                   | 1 (24)                    | 2 (38)                    | 2             | pass                            |
| 197     | 9                         | Bin2_plateA2_B1.fcs  | 2 (45)                    | 3 (43)                    | 10 (17)                   | 2             | pass                            |
| 198     | 9                         | Bin2_plateA2_B3.fcs  | 5 (57)                    | 9 (39)                    | 2 (29)                    | 2             | pass                            |
| 199     | 9                         | Bin2_plateA2_B5.fcs  | 3 (74)                    | 5 (53)                    | 9 (90)                    | 2             | pass                            |
| 200     | 9                         | Bin2_plateA2_B6.fcs  | 2 (40)                    | 9 (108)                   | 3 (100)                   | 2             | pass                            |
| 201     | 9                         | Bin2_plateA2_B7.fcs  | 3 (46)                    | 6 (26)                    | 9 (36)                    | 2             | pass                            |
| 202     | 9                         | Bin2_plateA2_B8.fcs  | 5 (14)                    | 10 (318)                  | -                         | 2             | fail                            |
| 203     | 9                         | Bin2_plateA2_B9.fcs  | 10 (104)                  | 6 (30)                    | 7 (111)                   | 2             | pass                            |
| 204     | 9                         | Bin2_plateA2_B10.fcs | 1 (19)                    | 5 (97)                    | 2 (86)                    | 2             | pass                            |
| 205     | 9                         | Bin2_plateA2_B11.fcs | 5 (38)                    | 10 (93)                   | -                         | 2             | fail                            |
| 206     | 9                         | Bin2_plateA2_B12.fcs | 2 (66)                    | 6 (31)                    | 3 (26)                    | 2             | pass                            |
| 207     | 9                         | Bin2_plateA2_C1.fcs  | 9 (51)                    | 10 (140)                  | 5 (28)                    | 2             | pass                            |
| 208     | 9                         | Bin2_plateA2_C2.fcs  | 5 (58)                    | 10 (21)                   | 3 (28)                    | 2             | pass                            |
| 209     | 9                         | Bin2_plateA2_C3.fcs  | 8 (89)                    | 6 (67)                    | 10 (24)                   | 2             | pass                            |
| 210     | 9                         | Bin2_plateA2_C4.fcs  | 10 (79)                   | 10 (103)                  | 5 (41)                    | 2             | pass                            |
| 211     | 9                         | Bin2_plateA2_C5.fcs  | 10 (85)                   | 6 (72)                    | 9 (84)                    | 2             | pass                            |
| 212     | 9                         | Bin2_plateA2_C6.fcs  | 5 (18)                    | 10 (68)                   | 7 (58)                    | 2             | pass                            |

| Bead ID | Tag acquisition session # | Tag data filename    | Split 1 media (# of tags) | Split 2 media (# of tags) | Split 3 media (# of tags) | Split 4 media | Pass tag deconvolution criteria |
|---------|---------------------------|----------------------|---------------------------|---------------------------|---------------------------|---------------|---------------------------------|
| 213     | 9                         | Bin2_plateA2_C7.fcs  | 6 (63)                    | 6 (52)                    | 3 (30)                    | 2             | pass                            |
| 214     | 9                         | Bin2_plateA2_C8.fcs  | 4 (84)                    | 10 (63)                   | 3 (7)                     | 2             | pass                            |
| 215     | 9                         | Bin2_plateA2_C9.fcs  | 7 (85)                    | 4 (27)                    | 2 (24)                    | 2             | pass                            |
| 216     | 9                         | Bin2_plateA2_C10.fcs | 1 (19)                    | 5 (160)                   | 3 (131)                   | 2             | pass                            |
| 217     | 9                         | Bin2_plateA2_C11.fcs | 10 (81)                   | 8 (23)                    | 7 (97)                    | 2             | pass                            |
| 218     | 9                         | Bin2_plateA2_C12.fcs | 7 (84)                    | 4 (21)                    | 8 (30)                    | 2             | pass                            |
| 219     | 9                         | Bin2_plateA2_D1.fcs  | 9 (44)                    | 6 (31)                    | 6 (63)                    | 2             | pass                            |
| 220     | 9                         | Bin2_plateA2_D2.fcs  | 10 (50)                   | 5 (81)                    | 5 (112)                   | 2             | pass                            |
| 221     | 9                         | Bin2_plateA2_D3.fcs  | 6 (32)                    | 8 (24)                    | 2 (72)                    | 2             | pass                            |
| 222     | 9                         | Bin2_plateA2_D4.fcs  | 7 (104)                   | 3 (37)                    | 6 (111)                   | 2             | pass                            |
| 223     | 9                         | Bin2_plateA2_D5.fcs  | 5 (41)                    | 9 (62)                    | 5 (35)                    | 2             | pass                            |
| 224     | 9                         | Bin2_plateA2_D6.fcs  | 8 (99)                    | 2 (13)                    | 2 (83)                    | 2             | pass                            |
| 225     | 9                         | Bin2_plateA2_D7.fcs  | 3 (102)                   | 2 (37)                    | -                         | 2             | fail                            |
| 226     | 9                         | Bin2_plateA2_D8.fcs  | -                         | 9 (10)                    | 3 (32)                    | 2             | fail                            |
| 227     | 9                         | Bin2_plateA2_D9.fcs  | 1 (16)                    | 5 (27)                    | 6 (80)                    | 2             | pass                            |
| 228     | 9                         | Bin2_plateA2_D10.fcs | 5 (43)                    | 2 (25)                    | 2 (72)                    | 2             | pass                            |
| 229     | 9                         | Bin2_plateA2_D11.fcs | 6 (100)                   | 5 (52)                    | 8 (27)                    | 2             | pass                            |
| 230     | 9                         | Bin2_plateA2_D12.fcs | 3 (36)                    | -                         | 1 (13)                    | 2             | fail                            |
| 231     | 9                         | Bin2_plateA2_E1.fcs  | -                         | 3 (62)                    | -                         | 2             | fail                            |
| 232     | 9                         | Bin2_plateA2_E2.fcs  | -                         | -                         | -                         | 2             | fail                            |
| 233     | 9                         | Bin2_plateA2_E3.fcs  | 2 (66)                    | -                         | 3 (33)                    | 2             | fail                            |
| 234     | 9                         | Bin2_plateA2_E4.fcs  | 6 (97)                    | 2 (55)                    | 9 (147)                   | 2             | pass                            |
| 235     | 9                         | Bin2_plateA2_E5.fcs  | 1 (8)                     | 6 (39)                    | 5 (173)                   | 2             | pass                            |
| 236     | 9                         | Bin2_plateA2_E6.fcs  | 8 (119)                   | 3 (47)                    | 2 (27)                    | 2             | pass                            |
| 237     | 9                         | Bin2_plateA2_E7.fcs  | 3 (117)                   | 5 (66)                    | 8 (55)                    | 2             | pass                            |
| 238     | 10                        | Bin2_plateA2_G8.fcs  | 6 (26)                    | 5 (24)                    | 2 (4)                     | 2             | pass                            |
| 239     | 10                        | Bin2_plateA2_E9.fcs  | 5 (12)                    | 7 (38)                    | 6 (34)                    | 2             | pass                            |
| 240     | 10                        | Bin2_plateA2_E10.fcs | 10 (89)                   | 8 (28)                    | 9 (74)                    | 2             | pass                            |
| 241     | 10                        | Bin2_plateA2_E11.fcs | 10 (107)                  | -                         | -                         | 2             | fail                            |
| 242     | 10                        | Bin2_plateA2_E12.fcs | 6 (66)                    | 4 (26)                    | 6 (68)                    | 2             | pass                            |
| 243     | 10                        | Bin2_plateA2_F1.fcs  | 4 (85)                    | 4 (34)                    | 10 (80)                   | 2             | pass                            |
| 244     | 10                        | Bin2_plateA2_F2.fcs  | 8 (129)                   | 10 (34)                   | 9 (81)                    | 2             | pass                            |
| 245     | 10                        | Bin2_plateA2_F3.fcs  | 5 (42)                    | 4 (19)                    | 7 (114)                   | 2             | pass                            |
| 246     | 10                        | Bin2_plateA2_F4.fcs  | 5 (18)                    | 9 (97)                    | 1 (13)                    | 2             | pass                            |
| 247     | 10                        | Bin2_plateA2_F5.fcs  | 9 (78)                    | 10 (42)                   | 9 (69)                    | 2             | pass                            |
| 248     | 10                        | Bin2_plateA2_F6.fcs  | 5 (38)                    | 6 (27)                    | 6 (155)                   | 2             | pass                            |
| 249     | 10                        | Bin2_plateA2_F7.fcs  | 4 (193)                   | 10 (116)                  | 7 (28)                    | 2             | pass                            |
| 250     | 10                        | Bin2_plateA2_F8.fcs  | -                         | 3 (8)                     | 1 (15)                    | 2             | fail                            |
| 251     | 10                        | Bin2_plateA2_F9.fcs  | 3 (52)                    | 4 (32)                    | 6 (78)                    | 2             | pass                            |
| 252     | 10                        | Bin2_plateA2_F10.fcs | 5 (24)                    | 10 (45)                   | 10 (33)                   | 2             | pass                            |
| 253     | 10                        | Bin2_plateA2_F11.fcs | 3 (96)                    | 3 (91)                    | 5 (89)                    | 2             | pass                            |
| 254     | 10                        | Bin2_plateA2_F12.fcs | 4 (52)                    | -                         | 6 (93)                    | 2             | fail                            |
| 255     | 10                        | Bin2_plateA2_G1.fcs  | 2 (54)                    | 3 (31)                    | 1 (10)                    | 2             | pass                            |

| Bead ID | Tag acquisition session # | Tag data filename    | Split 1 media (# of tags) | Split 2 media (# of tags) | Split 3 media (# of tags) | Split 4 media | Pass tag deconvolution criteria |
|---------|---------------------------|----------------------|---------------------------|---------------------------|---------------------------|---------------|---------------------------------|
| 256     | 10                        | Bin2_plateA2_G4.fcs  | -                         | 9 (50)                    | 3 (11)                    | 2             | fail                            |
| 257     | 10                        | Bin2_plateA2_G5.fcs  | -                         | 7 (45)                    | 10 (16)                   | 2             | fail                            |
| 258     | 10                        | Bin2_plateA2_G6.fcs  | 5 (54)                    | 5 (20)                    | 3 (17)                    | 2             | pass                            |
| 259     | 10                        | Bin2_plateA2_G7.fcs  | 2 (89)                    | 10 (100)                  | 5 (9)                     | 2             | pass                            |
| 260     | 11                        | Bin3_plateA2_B9.fcs  | 3 (121)                   | 5 (129)                   | 8 (78)                    | 3             | pass                            |
| 261     | 11                        | Bin3_plateA2_A1.fcs  | 5 (8)                     | 9 (195)                   | 1 (46)                    | 3             | pass                            |
| 262     | 11                        | Bin3_plateA2_A2.fcs  | 5 (9)                     | 10 (59)                   | 9 (27)                    | 3             | pass                            |
| 263     | 11                        | Bin3_plateA2_A3.fcs  | 9 (87)                    | 4 (9)                     | 3 (14)                    | 3             | pass                            |
| 264     | 11                        | Bin3_plateA2_A4.fcs  | 9 (44)                    | 5 (143)                   | 7 (25)                    | 3             | pass                            |
| 265     | 11                        | Bin3_plateA2_A5.fcs  | 8 (111)                   | 6 (75)                    | 10 (52)                   | 3             | pass                            |
| 266     | 11                        | Bin3_plateA2_A6.fcs  | 1 (5)                     | 7 (85)                    | 10 (5)                    | 3             | pass                            |
| 267     | 11                        | Bin3_plateA2_A7.fcs  | 7 (106)                   | 1 (117)                   | 7 (64)                    | 3             | pass                            |
| 268     | 11                        | Bin3_plateA2_A8.fcs  | 7 (41)                    | 4 (12)                    | 2 (6)                     | 3             | pass                            |
| 269     | 11                        | Bin3_plateA2_A9.fcs  | 5 (15)                    | 10 (105)                  | -                         | 3             | fail                            |
| 270     | 11                        | Bin3_plateA2_A10.fcs | 2 (77)                    | 3 (33)                    | 8 (29)                    | 3             | pass                            |
| 271     | 11                        | Bin3_plateA2_A11.fcs | 5 (34)                    | 9 (66)                    | 2 (7)                     | 3             | pass                            |
| 272     | 11                        | Bin3_plateA2_A12.fcs | 1 (15)                    | 5 (17)                    | 7 (50)                    | 3             | pass                            |
| 273     | 11                        | Bin3_plateA2_B2.fcs  | 6 (72)                    | -                         | -                         | 3             | fail                            |
| 274     | 11                        | Bin3_plateA2_B3.fcs  | 7 (35)                    | 10 (124)                  | 2 (14)                    | 3             | pass                            |
| 275     | 11                        | Bin3_plateA2_B5.fcs  | -                         | -                         | 4 (32)                    | 3             | fail                            |
| 276     | 11                        | Bin3_plateA2_B6.fcs  | 2 (51)                    | 6 (101)                   | 10 (22)                   | 3             | pass                            |
| 277     | 11                        | Bin3_plateA2_B7.fcs  | 7 (48)                    | 10 (61)                   | 3 (20)                    | 3             | pass                            |
| 278     | 11                        | Bin3_plateA2_B8.fcs  | 5 (22)                    | 10 (81)                   | 9 (13)                    | 3             | pass                            |
| 279     | 12                        | Bin3_plateA2_B12.fcs | -                         | -                         | 9 (99)                    | 3             | fail                            |
| 280     | 12                        | Bin3_plateA2_B10.fcs | 1 (16)                    | 5 (74)                    | 3 (57)                    | 3             | pass                            |
| 281     | 12                        | Bin3_plateA2_B11.fcs | 3 (66)                    | 5 (40)                    | 2 (61)                    | 3             | pass                            |
| 282     | 13                        | Bin4_plateA2_E8.fcs  | 10 (246)                  | 8 (20)                    | 7 (104)                   | 4             | pass                            |
| 283     | 13                        | Bin4_plateA2_D1.fcs  | 10 (131)                  | 9 (137)                   | 5 (134)                   | 4             | pass                            |
| 284     | 13                        | Bin4_plateA2_D2.fcs  | 1 (21)                    | 5 (37)                    | 2 (242)                   | 4             | pass                            |
| 285     | 13                        | Bin4_plateA2_D3.fcs  | 10 (140)                  | 1 (40)                    | 5 (98)                    | 4             | pass                            |
| 286     | 13                        | Bin4_plateA2_D4.fcs  | 3 (59)                    | 1 (51)                    | 8 (95)                    | 4             | pass                            |
| 287     | 13                        | Bin4_plateA2_D5.fcs  | 3 (76)                    | 2 (13)                    | 2 (60)                    | 4             | pass                            |
| 288     | 13                        | Bin4_plateA2_D6.fcs  | 1 (8)                     | 2 (23)                    | 9 (37)                    | 4             | pass                            |
| 289     | 13                        | Bin4_plateA2_D7.fcs  | 1 (8)                     | -                         | 8 (23)                    | 4             | fail                            |
| 290     | 13                        | Bin4_plateA2_D8.fcs  | -                         | -                         | -                         | 4             | fail                            |
| 291     | 13                        | Bin4_plateA2_D9.fcs  | 5 (50)                    | 5 (37)                    | 1 (57)                    | 4             | pass                            |
| 292     | 13                        | Bin4_plateA2_D10.fcs | -                         | 9 (46)                    | 2 (9)                     | 4             | fail                            |
| 293     | 13                        | Bin4_plateA2_D11.fcs | 3 (21)                    | -                         | 8 (153)                   | 4             | fail                            |
| 294     | 13                        | Bin4_plateA2_D12.fcs | 5 (12)                    | 10 (75)                   | 6 (116)                   | 4             | pass                            |
| 295     | 13                        | Bin4_plateA2_E1.fcs  | 10 (113)                  | 8 (17)                    | 8 (86)                    | 4             | pass                            |
| 296     | 13                        | Bin4_plateA2_E2.fcs  | 4 (90)                    | 6 (8)                     | -                         | 4             | fail                            |
| 297     | 13                        | Bin4_plateA2_E3.fcs  | -                         | 6 (7)                     | 6 (11)                    | 4             | fail                            |
| 298     | 13                        | Bin4_plateA2_E4.fcs  | 1 (6)                     | 9 (61)                    | 5 (7)                     | 4             | pass                            |

| Bead ID | Tag acquisition session # | Tag data filename    | Split 1 media (# of tags) | Split 2 media (# of tags) | Split 3 media (# of tags) | Split 4 media | Pass tag deconvolution criteria |
|---------|---------------------------|----------------------|---------------------------|---------------------------|---------------------------|---------------|---------------------------------|
| 299     | 13                        | Bin4_plateA2_E5.fcs  | 1 (5)                     | 5 (37)                    | 2 (17)                    | 4             | pass                            |
| 300     | 13                        | Bin4_plateA2_E6.fcs  | -                         | 5 (23)                    | 9 (7)                     | 4             | fail                            |
| 301     | 13                        | Bin4_plateA2_E7.fcs  | 2 (61)                    | 6 (8)                     | 7 (15)                    | 4             | pass                            |
| 302     | 14                        | Bin4_plateA2_G12.fcs | 5 (31)                    | -                         | 2 (78)                    | 4             | fail                            |
| 303     | 14                        | Bin4_plateA2_E9.fcs  | 6 (34)                    | 10 (86)                   | 10 (41)                   | 4             | pass                            |
| 304     | 14                        | Bin4_plateA2_E10.fcs | 4 (179)                   | 5 (71)                    | 6 (131)                   | 4             | pass                            |
| 305     | 14                        | Bin4_plateA2_E11.fcs | 1 (16)                    | 8 (40)                    | 6 (64)                    | 4             | pass                            |
| 306     | 14                        | Bin4_plateA2_E12.fcs | 7 (23)                    | 6 (31)                    | 6 (115)                   | 4             | pass                            |
| 307     | 14                        | Bin4_plateA2_F1.fcs  | 9 (69)                    | 9 (29)                    | 10 (102)                  | 4             | pass                            |
| 308     | 14                        | Bin4_plateA2_F2.fcs  | 10 (175)                  | 5 (24)                    | 9 (120)                   | 4             | pass                            |
| 309     | 14                        | Bin4_plateA2_F3.fcs  | 3 (57)                    | 10 (151)                  | 10 (18)                   | 4             | pass                            |
| 310     | 14                        | Bin4_plateA2_F4.fcs  | 1 (6)                     | 5 (10)                    | 9 (9)                     | 4             | pass                            |
| 311     | 14                        | Bin4_plateA2_F5.fcs  | -                         | 5 (55)                    | 3 (14)                    | 4             | fail                            |
| 312     | 14                        | Bin4_plateA2_F6.fcs  | 1 (23)                    | 10 (44)                   | 7 (66)                    | 4             | pass                            |
| 313     | 14                        | Bin4_plateA2_F7.fcs  | -                         | -                         | 1 (36)                    | 4             | fail                            |
| 314     | 14                        | Bin4_plateA2_F8.fcs  | 7 (96)                    | 3 (34)                    | -                         | 4             | fail                            |
| 315     | 14                        | Bin4_plateA2_F9.fcs  | 2 (32)                    | 5 (47)                    | 9 (27)                    | 4             | pass                            |
| 316     | 14                        | Bin4_plateA2_F10.fcs | 5 (27)                    | 3 (38)                    | 9 (84)                    | 4             | pass                            |
| 317     | 14                        | Bin4_plateA2_F11.fcs | 6 (105)                   | 8 (35)                    | 4 (28)                    | 4             | pass                            |
| 318     | 14                        | Bin4_plateA2_F12.fcs | 5 (29)                    | 9 (96)                    | 3 (134)                   | 4             | pass                            |
| 319     | 14                        | Bin4_plateA2_G4.fcs  | 7 (42)                    | 2 (6)                     | 3 (14)                    | 4             | pass                            |
| 320     | 14                        | Bin4_plateA2_G6.fcs  | 5 (4)                     | 10 (199)                  | -                         | 4             | fail                            |
| 321     | 14                        | Bin4_plateA2_G7.fcs  | 4 (90)                    | 8 (29)                    | 3 (28)                    | 4             | pass                            |
| 322     | 14                        | Bin4_plateA2_G8.fcs  | -                         | 9 (19)                    | 10 (21)                   | 4             | fail                            |
| 323     | 14                        | Bin4_plateA2_G9.fcs  | 1 (7)                     | 1 (7)                     | 6 (28)                    | 4             | pass                            |
| 324     | 14                        | Bin4_plateA2_G10.fcs | 1 (15)                    | -                         | -                         | 4             | fail                            |
| 325     | 14                        | Bin4_plateA2_G11.fcs | 1 (6)                     | -                         | 2 (30)                    | 4             | fail                            |
| 326     | 15                        | Bin5_plateA0_C8.fcs  | 3 (134)                   | 1 (37)                    | 5 (46)                    | 5             | pass                            |
| 327     | 15                        | Bin5_plateA0_B7.fcs  | 6 (12)                    | 2 (9)                     | 5 (18)                    | 5             | pass                            |
| 328     | 15                        | Bin5_plateA0_B8.fcs  | 5 (43)                    | 9 (134)                   | 6 (110)                   | 5             | pass                            |
| 329     | 15                        | Bin5_plateA0_B9.fcs  | 6 (54)                    | 6 (20)                    | 10 (19)                   | 5             | pass                            |
| 330     | 15                        | Bin5_plateA0_B10.fcs | 4 (157)                   | 6 (100)                   | 5 (29)                    | 5             | pass                            |
| 331     | 15                        | Bin5_plateA0_C1.fcs  | 4 (242)                   | 2 (75)                    | 3 (33)                    | 5             | pass                            |
| 332     | 15                        | Bin5_plateA0_C2.fcs  | 2 (162)                   | 10 (170)                  | -                         | 5             | fail                            |
| 333     | 15                        | Bin5_plateA0_C3.fcs  | 1 (19)                    | -                         | 6 (102)                   | 5             | fail                            |
| 334     | 15                        | Bin5_plateA0_C4.fcs  | 4 (198)                   | 5 (58)                    | 1 (32)                    | 5             | pass                            |
| 335     | 15                        | Bin5_plateA0_C5.fcs  | -                         | 5 (23)                    | 3 (36)                    | 5             | fail                            |
| 336     | 15                        | Bin5_plateA0_C6.fcs  | 4 (222)                   | -                         | 4 (102)                   | 5             | fail                            |
| 337     | 15                        | Bin5_plateA0_C7.fcs  | 10 (150)                  | 10 (86)                   | 1 (22)                    | 5             | pass                            |
| 338     | 16                        | Bin5_plateA0_G5.fcs  | 7 (163)                   | 2 (96)                    | 7 (41)                    | 5             | pass                            |
| 339     | 16                        | Bin5_plateA0_C9.fcs  | 7 (78)                    | 9 (117)                   | 6 (64)                    | 5             | pass                            |
| 340     | 16                        | Bin5_plateA0_C10.fcs | 5 (12)                    | 9 (25)                    | 5 (18)                    | 5             | pass                            |
| 341     | 16                        | Bin5_plateA0_C11.fcs | 2 (73)                    | 7 (116)                   | 7 (70)                    | 5             | pass                            |



| Bead ID | Tag acquisition session # | Tag data filename    | Split 1 media (# of tags) | Split 2 media (# of tags) | Split 3 media (# of tags) | Split 4 media | Pass tag deconvolution criteria |
|---------|---------------------------|----------------------|---------------------------|---------------------------|---------------------------|---------------|---------------------------------|
| 342     | 16                        | Bin5_plateA0_D1.fcs  | 1 (11)                    | 6 (47)                    | 6 (117)                   | 5             | pass                            |
| 343     | 16                        | Bin5_plateA0_D2.fcs  | 6 (53)                    | 10 (31)                   | 10 (5)                    | 5             | pass                            |
| 344     | 16                        | Bin5_plateA0_D3.fcs  | 10 (101)                  | 6 (76)                    | 2 (49)                    | 5             | pass                            |
| 345     | 16                        | Bin5_plateA0_D4.fcs  | 4 (178)                   | 9 (44)                    | 8 (48)                    | 5             | pass                            |
| 346     | 16                        | Bin5_plateA0_D5.fcs  | -                         | -                         | -                         | 5             | fail                            |
| 347     | 16                        | Bin5_plateA0_D6.fcs  | 5 (30)                    | 2 (32)                    | 6 (130)                   | 5             | pass                            |
| 348     | 16                        | Bin5_plateA0_D7.fcs  | 7 (153)                   | 9 (159)                   | 9 (22)                    | 5             | pass                            |
| 349     | 16                        | Bin5_plateA0_D8.fcs  | 10 (123)                  | 1 (42)                    | 6 (101)                   | 5             | pass                            |
| 350     | 16                        | Bin5_plateA0_D9.fcs  | 5 (42)                    | 9 (25)                    | 9 (19)                    | 5             | pass                            |
| 351     | 16                        | Bin5_plateA0_D10.fcs | 9 (110)                   | 1 (16)                    | 6 (279)                   | 5             | pass                            |
| 352     | 16                        | Bin5_plateA0_D11.fcs | 4 (169)                   | -                         | 10 (238)                  | 5             | fail                            |
| 353     | 16                        | Bin5_plateA0_D12.fcs | 3 (120)                   | 2 (50)                    | 5 (116)                   | 5             | pass                            |
| 354     | 16                        | Bin5_plateA0_E1.fcs  | -                         | 8 (45)                    | 8 (179)                   | 5             | fail                            |
| 355     | 16                        | Bin5_plateA0_E2.fcs  | 1 (26)                    | 5 (42)                    | 1 (22)                    | 5             | pass                            |
| 356     | 16                        | Bin5_plateA0_E3.fcs  | 7 (127)                   | 7 (31)                    | 5 (204)                   | 5             | pass                            |
| 357     | 16                        | Bin5_plateA0_E4.fcs  | 8 (85)                    | 7 (70)                    | 3 (43)                    | 5             | pass                            |
| 358     | 16                        | Bin5_plateA0_E5.fcs  | 10 (58)                   | 5 (89)                    | 5 (28)                    | 5             | pass                            |
| 359     | 16                        | Bin5_plateA0_E6.fcs  | -                         | 10 (22)                   | 4 (22)                    | 5             | fail                            |
| 360     | 16                        | Bin5_plateA0_E7.fcs  | 9 (110)                   | -                         | 1 (142)                   | 5             | fail                            |
| 361     | 16                        | Bin5_plateA0_E9.fcs  | 10 (47)                   | 2 (12)                    | 5 (31)                    | 5             | pass                            |
| 362     | 16                        | Bin5_plateA0_E10.fcs | -                         | -                         | 2 (4)                     | 5             | fail                            |
| 363     | 16                        | Bin5_plateA0_E11.fcs | 9 (76)                    | 5 (57)                    | 1 (72)                    | 5             | pass                            |
| 364     | 16                        | Bin5_plateA0_E12.fcs | 2 (21)                    | 4 (6)                     | 2 (52)                    | 5             | pass                            |
| 365     | 16                        | Bin5_plateA0_F1.fcs  | 1 (23)                    | 9 (99)                    | 1 (78)                    | 5             | pass                            |
| 366     | 16                        | Bin5_plateA0_F2.fcs  | 5 (11)                    | 9 (153)                   | 9 (11)                    | 5             | pass                            |
| 367     | 16                        | Bin5_plateA0_F3.fcs  | 1 (35)                    | 5 (39)                    | 10 (41)                   | 5             | pass                            |
| 368     | 16                        | Bin5_plateA0_F4.fcs  | 1 (17)                    | 9 (234)                   | 7 (33)                    | 5             | pass                            |
| 369     | 16                        | Bin5_plateA0_F5.fcs  | 6 (21)                    | 9 (9)                     | -                         | 5             | fail                            |
| 370     | 16                        | Bin5_plateA0_F6.fcs  | 10 (44)                   | 10 (34)                   | 8 (90)                    | 5             | pass                            |
| 371     | 16                        | Bin5_plateA0_F7.fcs  | -                         | -                         | -                         | 5             | fail                            |
| 372     | 16                        | Bin5_plateA0_F8.fcs  | 1 (25)                    | 5 (28)                    | 2 (45)                    | 5             | pass                            |
| 373     | 16                        | Bin5_plateA0_F9.fcs  | 5 (8)                     | 10 (11)                   | 6 (4)                     | 5             | pass                            |
| 374     | 16                        | Bin5_plateA0_F10.fcs | 9 (89)                    | 9 (83)                    | 10 (30)                   | 5             | pass                            |
| 375     | 16                        | Bin5_plateA0_F12.fcs | 7 (26)                    | 8 (10)                    | 5 (8)                     | 5             | pass                            |
| 376     | 16                        | Bin5_plateA0_G2.fcs  | 4 (44)                    | 2 (22)                    | 3 (15)                    | 5             | pass                            |
| 377     | 16                        | Bin5_plateA0_G3.fcs  | 3 (20)                    | 6 (14)                    | 3 (15)                    | 5             | pass                            |
| 378     | 16                        | Bin5_plateA0_G4.fcs  | 1 (6)                     | 6 (87)                    | 8 (60)                    | 5             | pass                            |
| 379     | 17                        | Bin7_plateA0_C3.fcs  | 1 (13)                    | 5 (88)                    | 1 (25)                    | 7             | pass                            |
| 380     | 17                        | Bin6_plateA2_A1.fcs  | 1 (14)                    | 5 (52)                    | 3 (56)                    | 6             | pass                            |
| 381     | 17                        | Bin6_plateA2_A2.fcs  | -                         | -                         | -                         | 6             | fail                            |
| 382     | 17                        | Bin6_plateA2_A4.fcs  | 3 (131)                   | 1 (70)                    | 2 (135)                   | 6             | pass                            |
| 383     | 17                        | Bin6_plateA2_A5.fcs  | 9 (221)                   | 6 (144)                   | 10 (50)                   | 6             | pass                            |
| 384     | 17                        | Bin6_plateA2_A6.fcs  | 5 (86)                    | 7 (77)                    | 1 (35)                    | 6             | pass                            |

| Bead ID | Tag acquisition session # | Tag data filename    | Split 1 media (# of tags) | Split 2 media (# of tags) | Split 3 media (# of tags) | Split 4 media | Pass tag deconvolution criteria |
|---------|---------------------------|----------------------|---------------------------|---------------------------|---------------------------|---------------|---------------------------------|
| 385     | 17                        | Bin6_plateA2_A7.fcs  | -                         | -                         | -                         | 6             | fail                            |
| 386     | 17                        | Bin6_plateA2_A9.fcs  | 7 (31)                    | 9 (35)                    | 6 (84)                    | 6             | pass                            |
| 387     | 17                        | Bin6_plateA2_A10.fcs | 10 (42)                   | 3 (36)                    | 9 (9)                     | 6             | pass                            |
| 388     | 17                        | Bin6_plateA2_A11.fcs | 5 (62)                    | 10 (134)                  | 1 (6)                     | 6             | pass                            |
| 389     | 17                        | Bin7_plateA0_C1.fcs  | 1 (7)                     | 10 (26)                   | 5 (4)                     | 7             | pass                            |
| 390     | 17                        | Bin7_plateA0_C2.fcs  | 2 (89)                    | 3 (27)                    | 2 (42)                    | 7             | pass                            |
| 391     | 18                        | Bin8_plateA0_G12.fcs | 10 (102)                  | 9 (43)                    | 4 (83)                    | 8             | pass                            |
| 392     | 18                        | Bin7_plateA0_C4.fcs  | 8 (105)                   | -                         | 7 (201)                   | 7             | fail                            |
| 393     | 18                        | Bin7_plateA0_C5.fcs  | 7 (102)                   | 6 (17)                    | 1 (26)                    | 7             | pass                            |
| 394     | 18                        | Bin7_plateA0_C7.fcs  | 8 (35)                    | 10 (134)                  | 6 (115)                   | 7             | pass                            |
| 395     | 18                        | Bin7_plateA0_C8.fcs  | -                         | -                         | 9 (330)                   | 7             | fail                            |
| 396     | 18                        | Bin7_plateA0_C9.fcs  | 4 (159)                   | 1 (41)                    | 3 (32)                    | 7             | pass                            |
| 397     | 18                        | Bin7_plateA0_C11.fcs | 3 (59)                    | 2 (27)                    | 3 (74)                    | 7             | pass                            |
| 398     | 18                        | Bin7_plateA0_C12.fcs | 6 (39)                    | 6 (32)                    | 6 (54)                    | 7             | pass                            |
| 399     | 18                        | Bin7_plateA0_D5.fcs  | 5 (56)                    | 10 (171)                  | 1 (6)                     | 7             | pass                            |
| 400     | 18                        | Bin7_plateA0_D6.fcs  | 8 (32)                    | 8 (12)                    | 4 (10)                    | 7             | pass                            |
| 401     | 18                        | Bin7_plateA0_D7.fcs  | -                         | -                         | -                         | 7             | fail                            |
| 402     | 18                        | Bin7_plateA0_D8.fcs  | 5 (25)                    | 3 (12)                    | 2 (24)                    | 7             | pass                            |
| 403     | 18                        | Bin7_plateA0_D9.fcs  | 7 (116)                   | 3 (33)                    | 6 (49)                    | 7             | pass                            |
| 404     | 18                        | Bin7_plateA0_D10.fcs | 8 (46)                    | 2 (54)                    | 10 (51)                   | 7             | pass                            |
| 405     | 18                        | Bin7_plateA0_D11.fcs | 3 (82)                    | 3 (77)                    | 4 (223)                   | 7             | pass                            |
| 406     | 18                        | Bin7_plateA0_D12.fcs | 10 (16)                   | 4 (9)                     | 9 (25)                    | 7             | pass                            |
| 407     | 18                        | Bin8_plateA0_F1.fcs  | -                         | -                         | -                         | 8             | fail                            |
| 408     | 18                        | Bin8_plateA0_F2.fcs  | 1 (6)                     | 5 (30)                    | 1 (7)                     | 8             | pass                            |
| 409     | 18                        | Bin8_plateA0_F3.fcs  | 8 (83)                    | 5 (46)                    | 9 (33)                    | 8             | pass                            |
| 410     | 18                        | Bin8_plateA0_F4.fcs  | 7 (152)                   | 9 (65)                    | 10 (77)                   | 8             | pass                            |
| 411     | 18                        | Bin8_plateA0_F5.fcs  | 7 (97)                    | 6 (54)                    | 1 (92)                    | 8             | pass                            |
| 412     | 18                        | Bin8_plateA0_F6.fcs  | 6 (74)                    | 6 (35)                    | 6 (82)                    | 8             | pass                            |
| 413     | 18                        | Bin8_plateA0_F7.fcs  | 2 (47)                    | 3 (24)                    | 5 (136)                   | 8             | pass                            |
| 414     | 18                        | Bin8_plateA0_F8.fcs  | -                         | -                         | 1 (25)                    | 8             | fail                            |
| 415     | 18                        | Bin8_plateA0_F9.fcs  | -                         | -                         | -                         | 8             | fail                            |
| 416     | 18                        | Bin8_plateA0_F10.fcs | 8 (102)                   | -                         | 1 (106)                   | 8             | fail                            |
| 417     | 18                        | Bin8_plateA0_F11.fcs | 10 (84)                   | 9 (37)                    | -                         | 8             | fail                            |
| 418     | 18                        | Bin8_plateA0_F12.fcs | 2 (97)                    | 5 (87)                    | 7 (34)                    | 8             | pass                            |
| 419     | 18                        | Bin8_plateA0_G4.fcs  | -                         | 5 (47)                    | 2 (5)                     | 8             | fail                            |
| 420     | 18                        | Bin8_plateA0_G5.fcs  | 1 (13)                    | 8 (32)                    | 1 (17)                    | 8             | pass                            |
| 421     | 18                        | Bin8_plateA0_G6.fcs  | -                         | -                         | -                         | 8             | fail                            |
| 422     | 18                        | Bin8_plateA0_G7.fcs  | 9 (50)                    | 9 (24)                    | 9 (29)                    | 8             | pass                            |
| 423     | 18                        | Bin8_plateA0_G8.fcs  | 5 (29)                    | 9 (146)                   | 9 (11)                    | 8             | pass                            |
| 424     | 18                        | Bin8_plateA0_G9.fcs  | 3 (55)                    | 3 (32)                    | 10 (12)                   | 8             | pass                            |
| 425     | 18                        | Bin8_plateA0_G10.fcs | 7 (87)                    | 6 (45)                    | 8 (32)                    | 8             | pass                            |
| 426     | 18                        | Bin8_plateA0_G11.fcs | -                         | 6 (7)                     | 2 (29)                    | 8             | fail                            |
| 427     | 19                        | Bin9_plateA0_D7.fcs  | 4 (119)                   | 7 (48)                    | 7 (139)                   | 9             | pass                            |

| Bead ID | Tag acquisition session # | Tag data filename    | Split 1 media (# of tags) | Split 2 media (# of tags) | Split 3 media (# of tags) | Split 4 media | Pass tag deconvolution criteria |
|---------|---------------------------|----------------------|---------------------------|---------------------------|---------------------------|---------------|---------------------------------|
| 428     | 19                        | Bin9_plateA0_A1.fcs  | 3 (90)                    | 9 (191)                   | 1 (27)                    | 9             | pass                            |
| 429     | 19                        | Bin9_plateA0_A2.fcs  | 10 (173)                  | 10 (106)                  | 3 (170)                   | 9             | pass                            |
| 430     | 19                        | Bin9_plateA0_A3.fcs  | 8 (52)                    | 9 (103)                   | 2 (63)                    | 9             | pass                            |
| 431     | 19                        | Bin9_plateA0_A4.fcs  | 6 (33)                    | 7 (30)                    | 2 (66)                    | 9             | pass                            |
| 432     | 19                        | Bin9_plateA0_A5.fcs  | 6 (85)                    | 5 (36)                    | 1 (18)                    | 9             | pass                            |
| 433     | 19                        | Bin9_plateA0_A6.fcs  | 1 (9)                     | 1 (53)                    | 9 (230)                   | 9             | pass                            |
| 434     | 19                        | Bin9_plateA0_A7.fcs  | 4 (188)                   | 8 (22)                    | 3 (74)                    | 9             | pass                            |
| 435     | 19                        | Bin9_plateA0_A8.fcs  | 6 (149)                   | 6 (34)                    | 6 (203)                   | 9             | pass                            |
| 436     | 19                        | Bin9_plateA0_A9.fcs  | 5 (58)                    | 6 (4)                     | 9 (89)                    | 9             | pass                            |
| 437     | 19                        | Bin9_plateA0_A10.fcs | 4 (38)                    | 9 (31)                    | 10 (12)                   | 9             | pass                            |
| 438     | 19                        | Bin9_plateA0_A11.fcs | 7 (58)                    | 9 (48)                    | 2 (38)                    | 9             | pass                            |
| 439     | 19                        | Bin9_plateA0_B1.fcs  | -                         | -                         | -                         | 9             | fail                            |
| 440     | 19                        | Bin9_plateA0_B2.fcs  | -                         | -                         | -                         | 9             | fail                            |
| 441     | 19                        | Bin9_plateA0_B3.fcs  | 3 (120)                   | 10 (94)                   | 9 (39)                    | 9             | pass                            |
| 442     | 19                        | Bin9_plateA0_B4.fcs  | 2 (198)                   | 4 (49)                    | 2 (83)                    | 9             | pass                            |
| 443     | 19                        | Bin9_plateA0_B5.fcs  | 1 (28)                    | 5 (78)                    | 2 (27)                    | 9             | pass                            |
| 444     | 19                        | Bin9_plateA0_B6.fcs  | 7 (121)                   | 3 (20)                    | 1 (53)                    | 9             | pass                            |
| 445     | 19                        | Bin9_plateA0_B7.fcs  | 7 (125)                   | 8 (29)                    | 9 (57)                    | 9             | pass                            |
| 446     | 19                        | Bin9_plateA0_B8.fcs  | -                         | -                         | -                         | 9             | fail                            |
| 447     | 19                        | Bin9_plateA0_B9.fcs  | 4 (62)                    | 6 (53)                    | 7 (7)                     | 9             | pass                            |
| 448     | 19                        | Bin9_plateA0_B10.fcs | 7 (146)                   | 2 (51)                    | -                         | 9             | fail                            |
| 449     | 19                        | Bin9_plateA0_B11.fcs | 9 (76)                    | 8 (19)                    | 9 (37)                    | 9             | pass                            |
| 450     | 19                        | Bin9_plateA0_B12.fcs | 8 (87)                    | 9 (97)                    | 8 (29)                    | 9             | pass                            |
| 451     | 19                        | Bin9_plateA0_C1.fcs  | 2 (69)                    | 10 (66)                   | 6 (40)                    | 9             | pass                            |
| 452     | 19                        | Bin9_plateA0_C2.fcs  | 1 (8)                     | 5 (84)                    | -                         | 9             | fail                            |
| 453     | 19                        | Bin9_plateA0_C3.fcs  | 2 (160)                   | 5 (178)                   | 5 (15)                    | 9             | pass                            |
| 454     | 19                        | Bin9_plateA0_C4.fcs  | 3 (114)                   | 6 (52)                    | 6 (30)                    | 9             | pass                            |
| 455     | 19                        | Bin9_plateA0_C5.fcs  | 10 (116)                  | 5 (19)                    | 1 (17)                    | 9             | pass                            |
| 456     | 19                        | Bin9_plateA0_C6.fcs  | 3 (57)                    | 4 (89)                    | 7 (132)                   | 9             | pass                            |
| 457     | 19                        | Bin9_plateA0_C7.fcs  | -                         | -                         | -                         | 9             | fail                            |
| 458     | 19                        | Bin9_plateA0_C8.fcs  | 7 (126)                   | 4 (18)                    | 4 (53)                    | 9             | pass                            |
| 459     | 19                        | Bin9_plateA0_C9.fcs  | -                         | -                         | -                         | 9             | fail                            |
| 460     | 19                        | Bin9_plateA0_C10.fcs | -                         | -                         | -                         | 9             | fail                            |
| 461     | 19                        | Bin9_plateA0_C11.fcs | 10 (162)                  | 4 (33)                    | 2 (24)                    | 9             | pass                            |
| 462     | 19                        | Bin9_plateA0_C12.fcs | 7 (66)                    | 5 (77)                    | 9 (32)                    | 9             | pass                            |
| 463     | 19                        | Bin9_plateA0_D1.fcs  | 9 (83)                    | 4 (12)                    | 1 (35)                    | 9             | pass                            |
| 464     | 19                        | Bin9_plateA0_D2.fcs  | 5 (12)                    | -                         | 6 (177)                   | 9             | fail                            |
| 465     | 19                        | Bin9_plateA0_D3.fcs  | 6 (123)                   | 10 (129)                  | 1 (44)                    | 9             | pass                            |
| 466     | 19                        | Bin9_plateA0_D4.fcs  | 10 (159)                  | -                         | -                         | 9             | fail                            |
| 467     | 19                        | Bin9_plateA0_D5.fcs  | 1 (17)                    | 5 (131)                   | 1 (7)                     | 9             | pass                            |
| 468     | 19                        | Bin9_plateA0_D6.fcs  | 6 (43)                    | 8 (21)                    | 5 (33)                    | 9             | pass                            |
| 469     | 20                        | Bin9_plateA0_H12.fcs | 2 (103)                   | 4 (41)                    | 1 (16)                    | 9             | pass                            |
| 470     | 20                        | Bin9_plateA0_D8.fcs  | -                         | -                         | -                         | 9             | fail                            |

| Bead ID | Tag acquisition session # | Tag data filename    | Split 1 media (# of tags) | Split 2 media (# of tags) | Split 3 media (# of tags) | Split 4 media | Pass tag deconvolution criteria |
|---------|---------------------------|----------------------|---------------------------|---------------------------|---------------------------|---------------|---------------------------------|
| 471     | 20                        | Bin9_plateA0_D9.fcs  | -                         | -                         | -                         | 9             | fail                            |
| 472     | 20                        | Bin9_plateA0_D10.fcs | 5 (50)                    | 2 (22)                    | 8 (53)                    | 9             | pass                            |
| 473     | 20                        | Bin9_plateA0_D11.fcs | 7 (64)                    | 7 (44)                    | 3 (38)                    | 9             | pass                            |
| 474     | 20                        | Bin9_plateA0_D12.fcs | 10 (71)                   | 5 (38)                    | 5 (76)                    | 9             | pass                            |
| 475     | 20                        | Bin9_plateA0_E1.fcs  | 2 (115)                   | 5 (44)                    | 1 (24)                    | 9             | pass                            |
| 476     | 20                        | Bin9_plateA0_E2.fcs  | 5 (48)                    | 10 (116)                  | 9 (32)                    | 9             | pass                            |
| 477     | 20                        | Bin9_plateA0_E3.fcs  | 5 (30)                    | 10 (122)                  | 7 (24)                    | 9             | pass                            |
| 478     | 20                        | Bin9_plateA0_E4.fcs  | 7 (81)                    | 6 (55)                    | 1 (40)                    | 9             | pass                            |
| 479     | 20                        | Bin9_plateA0_E5.fcs  | -                         | -                         | -                         | 9             | fail                            |
| 480     | 20                        | Bin9_plateA0_E6.fcs  | 6 (93)                    | 8 (17)                    | 2 (60)                    | 9             | pass                            |
| 481     | 20                        | Bin9_plateA0_E7.fcs  | 6 (237)                   | 9 (169)                   | 2 (23)                    | 9             | pass                            |
| 482     | 20                        | Bin9_plateA0_E8.fcs  | 10 (83)                   | 4 (33)                    | 2 (47)                    | 9             | pass                            |
| 483     | 20                        | Bin9_plateA0_E9.fcs  | 7 (67)                    | -                         | -                         | 9             | fail                            |
| 484     | 20                        | Bin9_plateA0_E10.fcs | 10 (135)                  | 7 (71)                    | 1 (16)                    | 9             | pass                            |
| 485     | 20                        | Bin9_plateA0_E11.fcs | 3 (140)                   | 8 (30)                    | 1 (37)                    | 9             | pass                            |
| 486     | 20                        | Bin9_plateA0_E12.fcs | -                         | -                         | -                         | 9             | fail                            |
| 487     | 20                        | Bin9_plateA0_F1.fcs  | 2 (83)                    | 9 (157)                   | 7 (9)                     | 9             | pass                            |
| 488     | 20                        | Bin9_plateA0_F2.fcs  | 5 (41)                    | 9 (41)                    | 2 (42)                    | 9             | pass                            |
| 489     | 20                        | Bin9_plateA0_F3.fcs  | 5 (31)                    | 9 (49)                    | 7 (28)                    | 9             | pass                            |
| 490     | 20                        | Bin9_plateA0_F4.fcs  | 7 (92)                    | 6 (6)                     | 1 (19)                    | 9             | pass                            |
| 491     | 20                        | Bin9_plateA0_F6.fcs  | 9 (97)                    | 5 (89)                    | 6 (93)                    | 9             | pass                            |
| 492     | 20                        | Bin9_plateA0_F7.fcs  | 5 (17)                    | 2 (19)                    | 7 (31)                    | 9             | pass                            |
| 493     | 20                        | Bin9_plateA0_F8.fcs  | 4 (141)                   | 7 (103)                   | 5 (11)                    | 9             | pass                            |
| 494     | 20                        | Bin9_plateA0_F9.fcs  | 3 (125)                   | 3 (21)                    | 10 (24)                   | 9             | pass                            |
| 495     | 20                        | Bin9_plateA0_F10.fcs | 8 (38)                    | 7 (51)                    | 4 (44)                    | 9             | pass                            |
| 496     | 20                        | Bin9_plateA0_F11.fcs | 8 (81)                    | 7 (94)                    | 7 (73)                    | 9             | pass                            |
| 497     | 20                        | Bin9_plateA0_F12.fcs | 3 (40)                    | 9 (100)                   | 2 (62)                    | 9             | pass                            |
| 498     | 20                        | Bin9_plateA0_G1.fcs  | 3 (100)                   | 7 (71)                    | 5 (59)                    | 9             | pass                            |
| 499     | 20                        | Bin9_plateA0_G2.fcs  | 3 (91)                    | 5 (9)                     | 9 (57)                    | 9             | pass                            |
| 500     | 20                        | Bin9_plateA0_G3.fcs  | 9 (82)                    | 1 (25)                    | 1 (32)                    | 9             | pass                            |
| 501     | 20                        | Bin9_plateA0_G4.fcs  | 7 (44)                    | 9 (46)                    | 1 (18)                    | 9             | pass                            |
| 502     | 20                        | Bin9_plateA0_G6.fcs  | 2 (40)                    | 6 (42)                    | 9 (51)                    | 9             | pass                            |
| 503     | 20                        | Bin9_plateA0_G7.fcs  | 3 (49)                    | 5 (35)                    | 5 (39)                    | 9             | pass                            |
| 504     | 20                        | Bin9_plateA0_G8.fcs  | -                         | -                         | -                         | 9             | fail                            |
| 505     | 20                        | Bin9_plateA0_G9.fcs  | 2 (39)                    | 9 (59)                    | 3 (10)                    | 9             | pass                            |
| 506     | 20                        | Bin9_plateA0_G10.fcs | -                         | 9 (90)                    | 8 (191)                   | 9             | fail                            |
| 507     | 20                        | Bin9_plateA0_G11.fcs | -                         | -                         | -                         | 9             | fail                            |
| 508     | 20                        | Bin9_plateA0_G12.fcs | 5 (7)                     | 10 (174)                  | 9 (34)                    | 9             | pass                            |
| 509     | 20                        | Bin9_plateA0_H1.fcs  | 2 (62)                    | 3 (60)                    | 8 (28)                    | 9             | pass                            |
| 510     | 20                        | Bin9_plateA0_H2.fcs  | 6 (86)                    | 10 (21)                   | 1 (69)                    | 9             | pass                            |
| 511     | 20                        | Bin9_plateA0_H3.fcs  | 1 (10)                    | 9 (48)                    | 9 (43)                    | 9             | pass                            |
| 512     | 20                        | Bin9_plateA0_H4.fcs  | 9 (70)                    | 5 (41)                    | 4 (27)                    | 9             | pass                            |
| 513     | 20                        | Bin9_plateA0_H5.fcs  | 1 (15)                    | 10 (89)                   | 1 (21)                    | 9             | pass                            |

| Bead ID | Tag acquisition session # | Tag data filename     | Split 1 media (# of tags) | Split 2 media (# of tags) | Split 3 media (# of tags) | Split 4 media | Pass tag deconvolution criteria |
|---------|---------------------------|-----------------------|---------------------------|---------------------------|---------------------------|---------------|---------------------------------|
| 514     | 20                        | Bin9_plateA0_H6.fcs   | 8 (48)                    | 8 (25)                    | 3 (23)                    | 9             | pass                            |
| 515     | 20                        | Bin9_plateA0_H7.fcs   | 3 (137)                   | -                         | 3 (136)                   | 9             | fail                            |
| 516     | 20                        | Bin9_plateA0_H8.fcs   | -                         | -                         | -                         | 9             | fail                            |
| 517     | 20                        | Bin9_plateA0_H9.fcs   | 7 (53)                    | 9 (62)                    | 2 (39)                    | 9             | pass                            |
| 518     | 20                        | Bin9_plateA0_H10.fcs  | 3 (90)                    | 7 (35)                    | 2 (89)                    | 9             | pass                            |
| 519     | 20                        | Bin9_plateA0_H11.fcs  | -                         | 5 (111)                   | 5 (40)                    | 9             | fail                            |
| 520     | 21                        | Bin10_plateA1_D12.fcs | 3 (36)                    | 9 (15)                    | 2 (32)                    | 10            | pass                            |
| 521     | 21                        | Bin9_plateB1_A1.fcs   | 1 (18)                    | 1 (22)                    | 10 (37)                   | 9             | pass                            |
| 522     | 21                        | Bin9_plateB1_A2.fcs   | 6 (121)                   | -                         | 2 (206)                   | 9             | fail                            |
| 523     | 21                        | Bin9_plateB1_A6.fcs   | 4 (87)                    | 6 (39)                    | 4 (108)                   | 9             | pass                            |
| 524     | 21                        | Bin9_plateB1_A7.fcs   | 8 (31)                    | 10 (28)                   | 3 (71)                    | 9             | pass                            |
| 525     | 21                        | Bin9_plateB1_A8.fcs   | -                         | 3 (9)                     | 2 (51)                    | 9             | fail                            |
| 526     | 21                        | Bin10_plateA1_C1.fcs  | 7 (10)                    | -                         | 5 (20)                    | 10            | fail                            |
| 527     | 21                        | Bin10_plateA1_C2.fcs  | 3 (46)                    | 1 (26)                    | 8 (87)                    | 10            | pass                            |
| 528     | 21                        | Bin10_plateA1_C3.fcs  | 10 (50)                   | 9 (16)                    | 1 (19)                    | 10            | pass                            |
| 529     | 21                        | Bin10_plateA1_C4.fcs  | 1 (15)                    | 7 (50)                    | 7 (111)                   | 10            | pass                            |
| 530     | 21                        | Bin10_plateA1_C5.fcs  | 2 (32)                    | 8 (14)                    | 4 (33)                    | 10            | pass                            |
| 531     | 21                        | Bin10_plateA1_C6.fcs  | -                         | -                         | -                         | 10            | fail                            |
| 532     | 21                        | Bin10_plateA1_C7.fcs  | 9 (21)                    | 2 (7)                     | 8 (19)                    | 10            | pass                            |
| 533     | 21                        | Bin10_plateA1_C8.fcs  | 5 (15)                    | -                         | 6 (32)                    | 10            | fail                            |
| 534     | 21                        | Bin10_plateA1_C9.fcs  | -                         | 8 (26)                    | 6 (11)                    | 10            | fail                            |
| 535     | 21                        | Bin10_plateA1_C10.fcs | -                         | 5 (65)                    | 10 (10)                   | 10            | fail                            |
| 536     | 21                        | Bin10_plateA1_D8.fcs  | 4 (114)                   | 7 (8)                     | 9 (33)                    | 10            | pass                            |
| 537     | 21                        | Bin10_plateA1_D9.fcs  | 4 (93)                    | 1 (39)                    | 3 (18)                    | 10            | pass                            |
| 538     | 21                        | Bin10_plateA1_D10.fcs | 6 (108)                   | 5 (72)                    | 9 (12)                    | 10            | pass                            |
| 539     | 21                        | Bin10_plateA1_D11.fcs | 8 (46)                    | 9 (25)                    | 1 (39)                    | 10            | pass                            |

## 6. PROTOCOL ANALYSIS

### 6.1 DATASET REVIEW

Once a dataset of protocols has been established, Ariadne™ allows post-acquisition resetting of gates on the COPAS sorting plot to specify a subset of hits for further analysis. For example, if ‘hits were sorted using two antibodies, the user can select those which are positive for both antibodies. No post acquisition flow sort criterion was applied in this study.

Table 9 lists the bead IDs included in the dataset analyzed by Ariadne™ and presented in the following sections of the report. The dataset only includes beads which fall within the (reset) COPAS gates and can be assigned a full cell culture history. Ariadne™ allows a range of analyses to be performed, to select protocols for validation. Analysis methodologies include linkage analysis which identifies frequently occurring media combinations; fingerprint analysis which clusters groups of beads with identical or similar protocols (i.e. protocols with common cell culture media on the same split) and calculates the probability of these clusters occurring randomly; and methods of comparing entire protocols such as hierarchical clustering and a similarity matrix. These results are presented and discussed in the following sections.

**Table 9:** Dataset Review. The following parameters are shown for each hit: Bead ID, protocol (“–” represents unreadable tag data), whether the bead passed the tag deconvolution, whether it falls within the (reset) COPAS gate and whether it is included in the protocol analysis dataset.

| Bead ID | Protocol      |               |               |               | Inclusion Criteria |                    |                      |
|---------|---------------|---------------|---------------|---------------|--------------------|--------------------|----------------------|
|         | Split 1 media | Split 2 media | Split 3 media | Split 4 media | Tag deconvolution  | Flow sort criteria | Included in analysis |
| 1       | 9             | 9             | 5             | 1             | pass               | pass               | Yes                  |
| 2       | 8             | -             | 10            | 1             | fail               | pass               | No                   |
| 3       | 9             | -             | 6             | 1             | fail               | pass               | No                   |
| 4       | 4             | 9             | 9             | 1             | pass               | pass               | Yes                  |
| 5       | 7             | 6             | 7             | 1             | pass               | pass               | Yes                  |
| 6       | 10            | 4             | 4             | 1             | pass               | pass               | Yes                  |
| 7       | 7             | 10            | 2             | 1             | pass               | pass               | Yes                  |
| 8       | 6             | 8             | 1             | 1             | pass               | pass               | Yes                  |
| 9       | 3             | 6             | 3             | 1             | pass               | pass               | Yes                  |
| 10      | 8             | 2             | 2             | 1             | pass               | pass               | Yes                  |
| 11      | 1             | -             | 2             | 1             | fail               | pass               | No                   |
| 12      | 2             | 5             | 4             | 1             | pass               | pass               | Yes                  |
| 13      | 10            | 8             | 2             | 1             | pass               | pass               | Yes                  |
| 14      | 3             | 7             | 3             | 1             | pass               | pass               | Yes                  |
| 15      | 1             | -             | 4             | 1             | fail               | pass               | No                   |
| 16      | 5             | -             | 5             | 1             | fail               | pass               | No                   |
| 17      | 10            | 10            | 5             | 1             | pass               | pass               | Yes                  |
| 18      | 4             | 6             | 9             | 1             | pass               | pass               | Yes                  |
| 19      | 7             | 2             | 10            | 1             | pass               | pass               | Yes                  |
| 20      | -             | -             | 1             | 1             | fail               | pass               | No                   |
| 21      | 9             | 4             | 2             | 1             | pass               | pass               | Yes                  |
| 22      | 1             | -             | 8             | 1             | fail               | pass               | No                   |
| 23      | 1             | 8             | 9             | 1             | pass               | pass               | Yes                  |
| 24      | 6             | 7             | 6             | 1             | pass               | pass               | Yes                  |
| 25      | 9             | 7             | 5             | 1             | pass               | pass               | Yes                  |

| Bead ID | Protocol      |               |               |               | Inclusion Criteria |                    |                      |
|---------|---------------|---------------|---------------|---------------|--------------------|--------------------|----------------------|
|         | Split 1 media | Split 2 media | Split 3 media | Split 4 media | Tag deconvolution  | Flow sort criteria | Included in analysis |
| 26      | 5             | 9             | 9             | 1             | pass               | pass               | Yes                  |
| 27      | 10            | 7             | 5             | 1             | pass               | pass               | Yes                  |
| 28      | 6             | 1             | 9             | 1             | pass               | pass               | Yes                  |
| 29      | 10            | 7             | 9             | 1             | pass               | pass               | Yes                  |
| 30      | -             | -             | 1             | 1             | fail               | pass               | No                   |
| 31      | 9             | -             | -             | 1             | fail               | pass               | No                   |
| 32      | 10            | 6             | 7             | 1             | pass               | pass               | Yes                  |
| 33      | 1             | 3             | -             | 1             | fail               | pass               | No                   |
| 34      | 6             | 10            | 6             | 1             | pass               | pass               | Yes                  |
| 35      | 5             | 2             | 7             | 1             | pass               | pass               | Yes                  |
| 36      | 1             | 10            | 5             | 1             | pass               | pass               | Yes                  |
| 37      | 4             | 6             | 2             | 1             | pass               | pass               | Yes                  |
| 38      | 8             | 10            | 8             | 1             | pass               | pass               | Yes                  |
| 39      | -             | -             | 2             | 1             | fail               | pass               | No                   |
| 40      | 5             | 4             | 5             | 1             | pass               | pass               | Yes                  |
| 41      | -             | -             | -             | 1             | fail               | pass               | No                   |
| 42      | 2             | 1             | 5             | 1             | pass               | pass               | Yes                  |
| 43      | -             | -             | -             | 1             | fail               | pass               | No                   |
| 44      | -             | 4             | 10            | 1             | fail               | pass               | No                   |
| 45      | 1             | 3             | 6             | 1             | pass               | pass               | Yes                  |
| 46      | 5             | 10            | 5             | 1             | pass               | pass               | Yes                  |
| 47      | 1             | 10            | -             | 1             | fail               | pass               | No                   |
| 48      | 3             | 1             | 10            | 1             | pass               | pass               | Yes                  |
| 49      | -             | -             | 9             | 1             | fail               | pass               | No                   |
| 50      | 9             | 5             | 8             | 1             | pass               | pass               | Yes                  |
| 51      | 9             | 1             | 7             | 1             | pass               | pass               | Yes                  |
| 52      | 6             | 4             | 7             | 1             | pass               | pass               | Yes                  |
| 53      | 9             | 3             | 7             | 1             | pass               | pass               | Yes                  |
| 54      | 2             | 5             | 3             | 1             | pass               | pass               | Yes                  |
| 55      | 9             | 6             | 7             | 1             | pass               | pass               | Yes                  |
| 56      | 7             | 6             | 10            | 1             | pass               | pass               | Yes                  |
| 57      | 6             | 9             | 6             | 1             | pass               | pass               | Yes                  |
| 58      | 7             | 7             | 2             | 1             | pass               | pass               | Yes                  |
| 59      | 5             | 3             | -             | 1             | fail               | pass               | No                   |
| 60      | 10            | 2             | 3             | 1             | pass               | pass               | Yes                  |
| 61      | 9             | 2             | 6             | 1             | pass               | pass               | Yes                  |
| 62      | 6             | 3             | -             | 1             | fail               | pass               | No                   |
| 63      | 3             | 8             | 2             | 1             | pass               | pass               | Yes                  |
| 64      | 10            | 4             | -             | 1             | fail               | pass               | No                   |
| 65      | 5             | 7             | 10            | 1             | pass               | pass               | Yes                  |
| 66      | 1             | 5             | 1             | 1             | pass               | pass               | Yes                  |
| 67      | 2             | 10            | 1             | 1             | pass               | pass               | Yes                  |
| 68      | 3             | 9             | 1             | 1             | pass               | pass               | Yes                  |

| Bead ID | Protocol      |               |               |               | Inclusion Criteria |                    |                      |
|---------|---------------|---------------|---------------|---------------|--------------------|--------------------|----------------------|
|         | Split 1 media | Split 2 media | Split 3 media | Split 4 media | Tag deconvolution  | Flow sort criteria | Included in analysis |
| 69      | 9             | 10            | 3             | 1             | pass               | pass               | Yes                  |
| 70      | 9             | 9             | 4             | 1             | pass               | pass               | Yes                  |
| 71      | 5             | 9             | 10            | 1             | pass               | pass               | Yes                  |
| 72      | -             | 9             | 7             | 1             | fail               | pass               | No                   |
| 73      | 10            | 2             | 6             | 1             | pass               | pass               | Yes                  |
| 74      | 1             | 10            | -             | 1             | fail               | pass               | No                   |
| 75      | 9             | 9             | 9             | 1             | pass               | pass               | Yes                  |
| 76      | 1             | -             | 4             | 1             | fail               | pass               | No                   |
| 77      | 4             | 6             | 7             | 1             | pass               | pass               | Yes                  |
| 78      | 9             | 3             | 10            | 1             | pass               | pass               | Yes                  |
| 79      | 3             | 6             | 1             | 1             | pass               | pass               | Yes                  |
| 80      | 2             | 5             | 9             | 1             | pass               | pass               | Yes                  |
| 81      | 9             | 4             | 6             | 1             | pass               | pass               | Yes                  |
| 82      | 10            | 8             | 10            | 1             | pass               | pass               | Yes                  |
| 83      | 4             | 6             | 6             | 1             | pass               | pass               | Yes                  |
| 84      | 2             | 10            | 5             | 1             | pass               | pass               | Yes                  |
| 85      | 8             | 8             | 2             | 1             | pass               | pass               | Yes                  |
| 86      | 1             | 6             | 2             | 1             | pass               | pass               | Yes                  |
| 87      | 6             | 3             | 7             | 1             | pass               | pass               | Yes                  |
| 88      | 8             | 7             | 10            | 1             | pass               | pass               | Yes                  |
| 89      | 3             | 9             | 3             | 1             | pass               | pass               | Yes                  |
| 90      | 6             | 3             | 9             | 1             | pass               | pass               | Yes                  |
| 91      | 4             | 10            | 4             | 1             | pass               | pass               | Yes                  |
| 92      | 1             | -             | 4             | 1             | fail               | pass               | No                   |
| 93      | 9             | 8             | 8             | 1             | pass               | pass               | Yes                  |
| 94      | 9             | -             | 6             | 1             | fail               | pass               | No                   |
| 95      | 9             | 7             | 3             | 1             | pass               | pass               | Yes                  |
| 96      | 10            | 10            | 7             | 1             | pass               | pass               | Yes                  |
| 97      | 10            | 8             | 1             | 1             | pass               | pass               | Yes                  |
| 98      | 10            | 5             | 8             | 1             | pass               | pass               | Yes                  |
| 99      | 7             | -             | 7             | 1             | fail               | pass               | No                   |
| 100     | -             | -             | -             | 1             | fail               | pass               | No                   |
| 101     | 1             | 5             | 9             | 1             | pass               | pass               | Yes                  |
| 102     | 9             | 5             | -             | 1             | fail               | pass               | No                   |
| 103     | 9             | -             | -             | 1             | fail               | pass               | No                   |
| 104     | -             | -             | 10            | 1             | fail               | pass               | No                   |
| 105     | -             | -             | 6             | 1             | fail               | pass               | No                   |
| 106     | 9             | 5             | 7             | 1             | pass               | pass               | Yes                  |
| 107     | -             | -             | 1             | 1             | fail               | pass               | No                   |
| 108     | 9             | 4             | 6             | 1             | pass               | pass               | Yes                  |
| 109     | 10            | -             | 6             | 1             | fail               | pass               | No                   |
| 110     | 7             | 3             | 1             | 1             | pass               | pass               | Yes                  |
| 111     | 5             | 5             | -             | 1             | fail               | pass               | No                   |



| Bead ID | Protocol      |               |               |               | Inclusion Criteria |                    |                      |
|---------|---------------|---------------|---------------|---------------|--------------------|--------------------|----------------------|
|         | Split 1 media | Split 2 media | Split 3 media | Split 4 media | Tag deconvolution  | Flow sort criteria | Included in analysis |
| 112     | 8             | 4             | 7             | 1             | pass               | pass               | Yes                  |
| 113     | 9             | 2             | 10            | 1             | pass               | pass               | Yes                  |
| 114     | 4             | 10            | 4             | 1             | pass               | pass               | Yes                  |
| 115     | -             | -             | -             | 1             | fail               | pass               | No                   |
| 116     | 3             | 10            | 4             | 1             | pass               | pass               | Yes                  |
| 117     | 10            | 6             | 1             | 1             | pass               | pass               | Yes                  |
| 118     | 9             | 7             | 3             | 1             | pass               | pass               | Yes                  |
| 119     | 4             | 1             | 2             | 1             | pass               | pass               | Yes                  |
| 120     | 10            | 2             | 9             | 1             | pass               | pass               | Yes                  |
| 121     | 5             | 9             | 2             | 1             | pass               | pass               | Yes                  |
| 122     | 9             | -             | 10            | 1             | fail               | pass               | No                   |
| 123     | -             | -             | -             | 1             | fail               | pass               | No                   |
| 124     | 8             | 10            | 9             | 1             | pass               | pass               | Yes                  |
| 125     | 1             | 4             | 10            | 1             | pass               | pass               | Yes                  |
| 126     | 5             | 9             | 5             | 1             | pass               | pass               | Yes                  |
| 127     | 2             | -             | -             | 1             | fail               | pass               | No                   |
| 128     | 6             | 8             | 1             | 1             | pass               | pass               | Yes                  |
| 129     | 2             | 4             | 3             | 1             | pass               | pass               | Yes                  |
| 130     | 6             | 6             | 10            | 1             | pass               | pass               | Yes                  |
| 131     | -             | -             | -             | 1             | fail               | pass               | No                   |
| 132     | 2             | 7             | 4             | 1             | pass               | pass               | Yes                  |
| 133     | 10            | -             | -             | 1             | fail               | pass               | No                   |
| 134     | 6             | 8             | 1             | 1             | pass               | pass               | Yes                  |
| 135     | 5             | 9             | 5             | 1             | pass               | pass               | Yes                  |
| 136     | 1             | 6             | 7             | 1             | pass               | pass               | Yes                  |
| 137     | 8             | -             | 8             | 1             | fail               | pass               | No                   |
| 138     | -             | 3             | -             | 1             | fail               | pass               | No                   |
| 139     | 4             | 6             | 7             | 1             | pass               | pass               | Yes                  |
| 140     | 5             | 1             | 10            | 1             | pass               | pass               | Yes                  |
| 141     | 5             | 10            | 6             | 1             | pass               | pass               | Yes                  |
| 142     | 9             | 2             | -             | 1             | fail               | pass               | No                   |
| 143     | -             | 10            | 6             | 1             | fail               | pass               | No                   |
| 144     | -             | -             | -             | 1             | fail               | pass               | No                   |
| 145     | 1             | 2             | 10            | 1             | pass               | pass               | Yes                  |
| 146     | 9             | -             | 6             | 1             | fail               | pass               | No                   |
| 147     | 2             | 3             | 8             | 1             | pass               | pass               | Yes                  |
| 148     | 2             | 4             | 2             | 1             | pass               | pass               | Yes                  |
| 149     | -             | 4             | 5             | 1             | fail               | pass               | No                   |
| 150     | 4             | 7             | 10            | 1             | pass               | pass               | Yes                  |
| 151     | 4             | 4             | 5             | 1             | pass               | pass               | Yes                  |
| 152     | 7             | 9             | 7             | 1             | pass               | pass               | Yes                  |
| 153     | -             | 6             | 1             | 1             | fail               | pass               | No                   |
| 154     | -             | -             | -             | 1             | fail               | pass               | No                   |

| Bead ID | Protocol      |               |               |               | Inclusion Criteria |                    |                      |
|---------|---------------|---------------|---------------|---------------|--------------------|--------------------|----------------------|
|         | Split 1 media | Split 2 media | Split 3 media | Split 4 media | Tag deconvolution  | Flow sort criteria | Included in analysis |
| 155     | 8             | 8             | 9             | 1             | pass               | pass               | Yes                  |
| 156     | -             | 3             | 1             | 1             | fail               | pass               | No                   |
| 157     | 7             | -             | 4             | 1             | fail               | pass               | No                   |
| 158     | 10            | 5             | 10            | 1             | pass               | pass               | Yes                  |
| 159     | 3             | 1             | 10            | 1             | pass               | pass               | Yes                  |
| 160     | 8             | 6             | 9             | 1             | pass               | pass               | Yes                  |
| 161     | 8             | 4             | 8             | 1             | pass               | pass               | Yes                  |
| 162     | 8             | 10            | 3             | 1             | pass               | pass               | Yes                  |
| 163     | 6             | 9             | 1             | 1             | pass               | pass               | Yes                  |
| 164     | 8             | 5             | 10            | 1             | pass               | pass               | Yes                  |
| 165     | -             | -             | -             | 1             | fail               | pass               | No                   |
| 166     | 1             | 5             | 2             | 1             | pass               | pass               | Yes                  |
| 167     | 5             | 5             | 5             | 1             | pass               | pass               | Yes                  |
| 168     | -             | -             | -             | 1             | fail               | pass               | No                   |
| 169     | 7             | 8             | 10            | 1             | pass               | pass               | Yes                  |
| 170     | 8             | 7             | 9             | 1             | pass               | pass               | Yes                  |
| 171     | 1             | 5             | 2             | 1             | pass               | pass               | Yes                  |
| 172     | 9             | 10            | 10            | 1             | pass               | pass               | Yes                  |
| 173     | 5             | 9             | 5             | 1             | pass               | pass               | Yes                  |
| 174     | 1             | 5             | 7             | 1             | pass               | pass               | Yes                  |
| 175     | 4             | 6             | 5             | 1             | pass               | pass               | Yes                  |
| 176     | 6             | 7             | 5             | 1             | pass               | pass               | Yes                  |
| 177     | -             | 5             | 2             | 1             | fail               | pass               | No                   |
| 178     | 4             | 6             | 1             | 1             | pass               | pass               | Yes                  |
| 179     | 6             | 5             | 6             | 1             | pass               | pass               | Yes                  |
| 180     | 5             | 10            | 5             | 1             | pass               | pass               | Yes                  |
| 181     | 1             | 3             | 10            | 1             | pass               | pass               | Yes                  |
| 182     | 6             | 5             | 3             | 1             | pass               | pass               | Yes                  |
| 183     | 4             | 9             | 5             | 1             | pass               | pass               | Yes                  |
| 184     | 2             | 9             | 6             | 1             | pass               | pass               | Yes                  |
| 185     | 3             | 4             | 1             | 2             | pass               | pass               | Yes                  |
| 186     | 5             | 10            | 2             | 2             | pass               | pass               | Yes                  |
| 187     | 8             | 6             | 5             | 2             | pass               | pass               | Yes                  |
| 188     | 9             | 4             | 9             | 2             | pass               | pass               | Yes                  |
| 189     | 4             | 9             | 3             | 2             | pass               | pass               | Yes                  |
| 190     | 3             | 6             | 10            | 2             | pass               | pass               | Yes                  |
| 191     | 5             | 9             | -             | 2             | fail               | pass               | No                   |
| 192     | 10            | -             | 1             | 2             | fail               | pass               | No                   |
| 193     | 10            | 4             | 4             | 2             | pass               | pass               | Yes                  |
| 194     | 10            | 6             | 9             | 2             | pass               | pass               | Yes                  |
| 195     | 5             | 8             | 9             | 2             | pass               | pass               | Yes                  |
| 196     | 4             | 1             | 2             | 2             | pass               | pass               | Yes                  |
| 197     | 2             | 3             | 10            | 2             | pass               | pass               | Yes                  |

| Bead ID | Protocol      |               |               |               | Inclusion Criteria |                    |                      |
|---------|---------------|---------------|---------------|---------------|--------------------|--------------------|----------------------|
|         | Split 1 media | Split 2 media | Split 3 media | Split 4 media | Tag deconvolution  | Flow sort criteria | Included in analysis |
| 198     | 5             | 9             | 2             | 2             | pass               | pass               | Yes                  |
| 199     | 3             | 5             | 9             | 2             | pass               | pass               | Yes                  |
| 200     | 2             | 9             | 3             | 2             | pass               | pass               | Yes                  |
| 201     | 3             | 6             | 9             | 2             | pass               | pass               | Yes                  |
| 202     | 5             | 10            | -             | 2             | fail               | pass               | No                   |
| 203     | 10            | 6             | 7             | 2             | pass               | pass               | Yes                  |
| 204     | 1             | 5             | 2             | 2             | pass               | pass               | Yes                  |
| 205     | 5             | 10            | -             | 2             | fail               | pass               | No                   |
| 206     | 2             | 6             | 3             | 2             | pass               | pass               | Yes                  |
| 207     | 9             | 10            | 5             | 2             | pass               | pass               | Yes                  |
| 208     | 5             | 10            | 3             | 2             | pass               | pass               | Yes                  |
| 209     | 8             | 6             | 10            | 2             | pass               | pass               | Yes                  |
| 210     | 10            | 10            | 5             | 2             | pass               | pass               | Yes                  |
| 211     | 10            | 6             | 9             | 2             | pass               | pass               | Yes                  |
| 212     | 5             | 10            | 7             | 2             | pass               | pass               | Yes                  |
| 213     | 6             | 6             | 3             | 2             | pass               | pass               | Yes                  |
| 214     | 4             | 10            | 3             | 2             | pass               | pass               | Yes                  |
| 215     | 7             | 4             | 2             | 2             | pass               | pass               | Yes                  |
| 216     | 1             | 5             | 3             | 2             | pass               | pass               | Yes                  |
| 217     | 10            | 8             | 7             | 2             | pass               | pass               | Yes                  |
| 218     | 7             | 4             | 8             | 2             | pass               | pass               | Yes                  |
| 219     | 9             | 6             | 6             | 2             | pass               | pass               | Yes                  |
| 220     | 10            | 5             | 5             | 2             | pass               | pass               | Yes                  |
| 221     | 6             | 8             | 2             | 2             | pass               | pass               | Yes                  |
| 222     | 7             | 3             | 6             | 2             | pass               | pass               | Yes                  |
| 223     | 5             | 9             | 5             | 2             | pass               | pass               | Yes                  |
| 224     | 8             | 2             | 2             | 2             | pass               | pass               | Yes                  |
| 225     | 3             | 2             | -             | 2             | fail               | pass               | No                   |
| 226     | -             | 9             | 3             | 2             | fail               | pass               | No                   |
| 227     | 1             | 5             | 6             | 2             | pass               | pass               | Yes                  |
| 228     | 5             | 2             | 2             | 2             | pass               | pass               | Yes                  |
| 229     | 6             | 5             | 8             | 2             | pass               | pass               | Yes                  |
| 230     | 3             | -             | 1             | 2             | fail               | pass               | No                   |
| 231     | -             | 3             | -             | 2             | fail               | pass               | No                   |
| 232     | -             | -             | -             | 2             | fail               | pass               | No                   |
| 233     | 2             | -             | 3             | 2             | fail               | pass               | No                   |
| 234     | 6             | 2             | 9             | 2             | pass               | pass               | Yes                  |
| 235     | 1             | 6             | 5             | 2             | pass               | pass               | Yes                  |
| 236     | 8             | 3             | 2             | 2             | pass               | pass               | Yes                  |
| 237     | 3             | 5             | 8             | 2             | pass               | pass               | Yes                  |
| 238     | 6             | 5             | 2             | 2             | pass               | pass               | Yes                  |
| 239     | 5             | 7             | 6             | 2             | pass               | pass               | Yes                  |
| 240     | 10            | 8             | 9             | 2             | pass               | pass               | Yes                  |

| Bead ID | Protocol      |               |               |               | Inclusion Criteria |                    |                      |
|---------|---------------|---------------|---------------|---------------|--------------------|--------------------|----------------------|
|         | Split 1 media | Split 2 media | Split 3 media | Split 4 media | Tag deconvolution  | Flow sort criteria | Included in analysis |
| 241     | 10            | -             | -             | 2             | fail               | pass               | No                   |
| 242     | 6             | 4             | 6             | 2             | pass               | pass               | Yes                  |
| 243     | 4             | 4             | 10            | 2             | pass               | pass               | Yes                  |
| 244     | 8             | 10            | 9             | 2             | pass               | pass               | Yes                  |
| 245     | 5             | 4             | 7             | 2             | pass               | pass               | Yes                  |
| 246     | 5             | 9             | 1             | 2             | pass               | pass               | Yes                  |
| 247     | 9             | 10            | 9             | 2             | pass               | pass               | Yes                  |
| 248     | 5             | 6             | 6             | 2             | pass               | pass               | Yes                  |
| 249     | 4             | 10            | 7             | 2             | pass               | pass               | Yes                  |
| 250     | -             | 3             | 1             | 2             | fail               | pass               | No                   |
| 251     | 3             | 4             | 6             | 2             | pass               | pass               | Yes                  |
| 252     | 5             | 10            | 10            | 2             | pass               | pass               | Yes                  |
| 253     | 3             | 3             | 5             | 2             | pass               | pass               | Yes                  |
| 254     | 4             | -             | 6             | 2             | fail               | pass               | No                   |
| 255     | 2             | 3             | 1             | 2             | pass               | pass               | Yes                  |
| 256     | -             | 9             | 3             | 2             | fail               | pass               | No                   |
| 257     | -             | 7             | 10            | 2             | fail               | pass               | No                   |
| 258     | 5             | 5             | 3             | 2             | pass               | pass               | Yes                  |
| 259     | 2             | 10            | 5             | 2             | pass               | pass               | Yes                  |
| 260     | 3             | 5             | 8             | 3             | pass               | pass               | Yes                  |
| 261     | 5             | 9             | 1             | 3             | pass               | pass               | Yes                  |
| 262     | 5             | 10            | 9             | 3             | pass               | pass               | Yes                  |
| 263     | 9             | 4             | 3             | 3             | pass               | pass               | Yes                  |
| 264     | 9             | 5             | 7             | 3             | pass               | pass               | Yes                  |
| 265     | 8             | 6             | 10            | 3             | pass               | pass               | Yes                  |
| 266     | 1             | 7             | 10            | 3             | pass               | pass               | Yes                  |
| 267     | 7             | 1             | 7             | 3             | pass               | pass               | Yes                  |
| 268     | 7             | 4             | 2             | 3             | pass               | pass               | Yes                  |
| 269     | 5             | 10            | -             | 3             | fail               | pass               | No                   |
| 270     | 2             | 3             | 8             | 3             | pass               | pass               | Yes                  |
| 271     | 5             | 9             | 2             | 3             | pass               | pass               | Yes                  |
| 272     | 1             | 5             | 7             | 3             | pass               | pass               | Yes                  |
| 273     | 6             | -             | -             | 3             | fail               | pass               | No                   |
| 274     | 7             | 10            | 2             | 3             | pass               | pass               | Yes                  |
| 275     | -             | -             | 4             | 3             | fail               | pass               | No                   |
| 276     | 2             | 6             | 10            | 3             | pass               | pass               | Yes                  |
| 277     | 7             | 10            | 3             | 3             | pass               | pass               | Yes                  |
| 278     | 5             | 10            | 9             | 3             | pass               | pass               | Yes                  |
| 279     | -             | -             | 9             | 3             | fail               | pass               | No                   |
| 280     | 1             | 5             | 3             | 3             | pass               | pass               | Yes                  |
| 281     | 3             | 5             | 2             | 3             | pass               | pass               | Yes                  |
| 282     | 10            | 8             | 7             | 4             | pass               | pass               | Yes                  |
| 283     | 10            | 9             | 5             | 4             | pass               | pass               | Yes                  |

| Bead ID | Protocol      |               |               |               | Inclusion Criteria |                    |                      |
|---------|---------------|---------------|---------------|---------------|--------------------|--------------------|----------------------|
|         | Split 1 media | Split 2 media | Split 3 media | Split 4 media | Tag deconvolution  | Flow sort criteria | Included in analysis |
| 284     | 1             | 5             | 2             | 4             | pass               | pass               | Yes                  |
| 285     | 10            | 1             | 5             | 4             | pass               | pass               | Yes                  |
| 286     | 3             | 1             | 8             | 4             | pass               | pass               | Yes                  |
| 287     | 3             | 2             | 2             | 4             | pass               | pass               | Yes                  |
| 288     | 1             | 2             | 9             | 4             | pass               | pass               | Yes                  |
| 289     | 1             | -             | 8             | 4             | fail               | pass               | No                   |
| 290     | -             | -             | -             | 4             | fail               | pass               | No                   |
| 291     | 5             | 5             | 1             | 4             | pass               | pass               | Yes                  |
| 292     | -             | 9             | 2             | 4             | fail               | pass               | No                   |
| 293     | 3             | -             | 8             | 4             | fail               | pass               | No                   |
| 294     | 5             | 10            | 6             | 4             | pass               | pass               | Yes                  |
| 295     | 10            | 8             | 8             | 4             | pass               | pass               | Yes                  |
| 296     | 4             | 6             | -             | 4             | fail               | pass               | No                   |
| 297     | -             | 6             | 6             | 4             | fail               | pass               | No                   |
| 298     | 1             | 9             | 5             | 4             | pass               | pass               | Yes                  |
| 299     | 1             | 5             | 2             | 4             | pass               | pass               | Yes                  |
| 300     | -             | 5             | 9             | 4             | fail               | pass               | No                   |
| 301     | 2             | 6             | 7             | 4             | pass               | pass               | Yes                  |
| 302     | 5             | -             | 2             | 4             | fail               | pass               | No                   |
| 303     | 6             | 10            | 10            | 4             | pass               | pass               | Yes                  |
| 304     | 4             | 5             | 6             | 4             | pass               | pass               | Yes                  |
| 305     | 1             | 8             | 6             | 4             | pass               | pass               | Yes                  |
| 306     | 7             | 6             | 6             | 4             | pass               | pass               | Yes                  |
| 307     | 9             | 9             | 10            | 4             | pass               | pass               | Yes                  |
| 308     | 10            | 5             | 9             | 4             | pass               | pass               | Yes                  |
| 309     | 3             | 10            | 10            | 4             | pass               | pass               | Yes                  |
| 310     | 1             | 5             | 9             | 4             | pass               | pass               | Yes                  |
| 311     | -             | 5             | 3             | 4             | fail               | pass               | No                   |
| 312     | 1             | 10            | 7             | 4             | pass               | pass               | Yes                  |
| 313     | -             | -             | 1             | 4             | fail               | pass               | No                   |
| 314     | 7             | 3             | -             | 4             | fail               | pass               | No                   |
| 315     | 2             | 5             | 9             | 4             | pass               | pass               | Yes                  |
| 316     | 5             | 3             | 9             | 4             | pass               | pass               | Yes                  |
| 317     | 6             | 8             | 4             | 4             | pass               | pass               | Yes                  |
| 318     | 5             | 9             | 3             | 4             | pass               | pass               | Yes                  |
| 319     | 7             | 2             | 3             | 4             | pass               | pass               | Yes                  |
| 320     | 5             | 10            | -             | 4             | fail               | pass               | No                   |
| 321     | 4             | 8             | 3             | 4             | pass               | pass               | Yes                  |
| 322     | -             | 9             | 10            | 4             | fail               | pass               | No                   |
| 323     | 1             | 1             | 6             | 4             | pass               | pass               | Yes                  |
| 324     | 1             | -             | -             | 4             | fail               | pass               | No                   |
| 325     | 1             | -             | 2             | 4             | fail               | pass               | No                   |
| 326     | 3             | 1             | 5             | 5             | pass               | pass               | Yes                  |

| Bead ID | Protocol      |               |               |               | Inclusion Criteria |                    |                      |
|---------|---------------|---------------|---------------|---------------|--------------------|--------------------|----------------------|
|         | Split 1 media | Split 2 media | Split 3 media | Split 4 media | Tag deconvolution  | Flow sort criteria | Included in analysis |
| 327     | 6             | 2             | 5             | 5             | pass               | pass               | Yes                  |
| 328     | 5             | 9             | 6             | 5             | pass               | pass               | Yes                  |
| 329     | 6             | 6             | 10            | 5             | pass               | pass               | Yes                  |
| 330     | 4             | 6             | 5             | 5             | pass               | pass               | Yes                  |
| 331     | 4             | 2             | 3             | 5             | pass               | pass               | Yes                  |
| 332     | 2             | 10            | -             | 5             | fail               | pass               | No                   |
| 333     | 1             | -             | 6             | 5             | fail               | pass               | No                   |
| 334     | 4             | 5             | 1             | 5             | pass               | pass               | Yes                  |
| 335     | -             | 5             | 3             | 5             | fail               | pass               | No                   |
| 336     | 4             | -             | 4             | 5             | fail               | pass               | No                   |
| 337     | 10            | 10            | 1             | 5             | pass               | pass               | Yes                  |
| 338     | 7             | 2             | 7             | 5             | pass               | pass               | Yes                  |
| 339     | 7             | 9             | 6             | 5             | pass               | pass               | Yes                  |
| 340     | 5             | 9             | 5             | 5             | pass               | pass               | Yes                  |
| 341     | 2             | 7             | 7             | 5             | pass               | pass               | Yes                  |
| 342     | 1             | 6             | 6             | 5             | pass               | pass               | Yes                  |
| 343     | 6             | 10            | 10            | 5             | pass               | pass               | Yes                  |
| 344     | 10            | 6             | 2             | 5             | pass               | pass               | Yes                  |
| 345     | 4             | 9             | 8             | 5             | pass               | pass               | Yes                  |
| 346     | -             | -             | -             | 5             | fail               | pass               | No                   |
| 347     | 5             | 2             | 6             | 5             | pass               | pass               | Yes                  |
| 348     | 7             | 9             | 9             | 5             | pass               | pass               | Yes                  |
| 349     | 10            | 1             | 6             | 5             | pass               | pass               | Yes                  |
| 350     | 5             | 9             | 9             | 5             | pass               | pass               | Yes                  |
| 351     | 9             | 1             | 6             | 5             | pass               | pass               | Yes                  |
| 352     | 4             | -             | 10            | 5             | fail               | pass               | No                   |
| 353     | 3             | 2             | 5             | 5             | pass               | pass               | Yes                  |
| 354     | -             | 8             | 8             | 5             | fail               | pass               | No                   |
| 355     | 1             | 5             | 1             | 5             | pass               | pass               | Yes                  |
| 356     | 7             | 7             | 5             | 5             | pass               | pass               | Yes                  |
| 357     | 8             | 7             | 3             | 5             | pass               | pass               | Yes                  |
| 358     | 10            | 5             | 5             | 5             | pass               | pass               | Yes                  |
| 359     | -             | 10            | 4             | 5             | fail               | pass               | No                   |
| 360     | 9             | -             | 1             | 5             | fail               | pass               | No                   |
| 361     | 10            | 2             | 5             | 5             | pass               | pass               | Yes                  |
| 362     | -             | -             | 2             | 5             | fail               | pass               | No                   |
| 363     | 9             | 5             | 1             | 5             | pass               | pass               | Yes                  |
| 364     | 2             | 4             | 2             | 5             | pass               | pass               | Yes                  |
| 365     | 1             | 9             | 1             | 5             | pass               | pass               | Yes                  |
| 366     | 5             | 9             | 9             | 5             | pass               | pass               | Yes                  |
| 367     | 1             | 5             | 10            | 5             | pass               | pass               | Yes                  |
| 368     | 1             | 9             | 7             | 5             | pass               | pass               | Yes                  |
| 369     | 6             | 9             | -             | 5             | fail               | pass               | No                   |

| Bead ID | Protocol      |               |               |               | Inclusion Criteria |                    |                      |
|---------|---------------|---------------|---------------|---------------|--------------------|--------------------|----------------------|
|         | Split 1 media | Split 2 media | Split 3 media | Split 4 media | Tag deconvolution  | Flow sort criteria | Included in analysis |
| 370     | 10            | 10            | 8             | 5             | pass               | pass               | Yes                  |
| 371     | -             | -             | -             | 5             | fail               | pass               | No                   |
| 372     | 1             | 5             | 2             | 5             | pass               | pass               | Yes                  |
| 373     | 5             | 10            | 6             | 5             | pass               | pass               | Yes                  |
| 374     | 9             | 9             | 10            | 5             | pass               | pass               | Yes                  |
| 375     | 7             | 8             | 5             | 5             | pass               | pass               | Yes                  |
| 376     | 4             | 2             | 3             | 5             | pass               | pass               | Yes                  |
| 377     | 3             | 6             | 3             | 5             | pass               | pass               | Yes                  |
| 378     | 1             | 6             | 8             | 5             | pass               | pass               | Yes                  |
| 379     | 1             | 5             | 1             | 7             | pass               | pass               | Yes                  |
| 380     | 1             | 5             | 3             | 6             | pass               | pass               | Yes                  |
| 381     | -             | -             | -             | 6             | fail               | pass               | No                   |
| 382     | 3             | 1             | 2             | 6             | pass               | pass               | Yes                  |
| 383     | 9             | 6             | 10            | 6             | pass               | pass               | Yes                  |
| 384     | 5             | 7             | 1             | 6             | pass               | pass               | Yes                  |
| 385     | -             | -             | -             | 6             | fail               | pass               | No                   |
| 386     | 7             | 9             | 6             | 6             | pass               | pass               | Yes                  |
| 387     | 10            | 3             | 9             | 6             | pass               | pass               | Yes                  |
| 388     | 5             | 10            | 1             | 6             | pass               | pass               | Yes                  |
| 389     | 1             | 10            | 5             | 7             | pass               | pass               | Yes                  |
| 390     | 2             | 3             | 2             | 7             | pass               | pass               | Yes                  |
| 391     | 10            | 9             | 4             | 8             | pass               | pass               | Yes                  |
| 392     | 8             | -             | 7             | 7             | fail               | pass               | No                   |
| 393     | 7             | 6             | 1             | 7             | pass               | pass               | Yes                  |
| 394     | 8             | 10            | 6             | 7             | pass               | pass               | Yes                  |
| 395     | -             | -             | 9             | 7             | fail               | pass               | No                   |
| 396     | 4             | 1             | 3             | 7             | pass               | pass               | Yes                  |
| 397     | 3             | 2             | 3             | 7             | pass               | pass               | Yes                  |
| 398     | 6             | 6             | 6             | 7             | pass               | pass               | Yes                  |
| 399     | 5             | 10            | 1             | 7             | pass               | pass               | Yes                  |
| 400     | 8             | 8             | 4             | 7             | pass               | pass               | Yes                  |
| 401     | -             | -             | -             | 7             | fail               | pass               | No                   |
| 402     | 5             | 3             | 2             | 7             | pass               | pass               | Yes                  |
| 403     | 7             | 3             | 6             | 7             | pass               | pass               | Yes                  |
| 404     | 8             | 2             | 10            | 7             | pass               | pass               | Yes                  |
| 405     | 3             | 3             | 4             | 7             | pass               | pass               | Yes                  |
| 406     | 10            | 4             | 9             | 7             | pass               | pass               | Yes                  |
| 407     | -             | -             | -             | 8             | fail               | pass               | No                   |
| 408     | 1             | 5             | 1             | 8             | pass               | pass               | Yes                  |
| 409     | 8             | 5             | 9             | 8             | pass               | pass               | Yes                  |
| 410     | 7             | 9             | 10            | 8             | pass               | pass               | Yes                  |
| 411     | 7             | 6             | 1             | 8             | pass               | pass               | Yes                  |
| 412     | 6             | 6             | 6             | 8             | pass               | pass               | Yes                  |

| Bead ID | Protocol      |               |               |               | Inclusion Criteria |                    |                      |
|---------|---------------|---------------|---------------|---------------|--------------------|--------------------|----------------------|
|         | Split 1 media | Split 2 media | Split 3 media | Split 4 media | Tag deconvolution  | Flow sort criteria | Included in analysis |
| 413     | 2             | 3             | 5             | 8             | pass               | pass               | Yes                  |
| 414     | -             | -             | 1             | 8             | fail               | pass               | No                   |
| 415     | -             | -             | -             | 8             | fail               | pass               | No                   |
| 416     | 8             | -             | 1             | 8             | fail               | pass               | No                   |
| 417     | 10            | 9             | -             | 8             | fail               | pass               | No                   |
| 418     | 2             | 5             | 7             | 8             | pass               | pass               | Yes                  |
| 419     | -             | 5             | 2             | 8             | fail               | pass               | No                   |
| 420     | 1             | 8             | 1             | 8             | pass               | pass               | Yes                  |
| 421     | -             | -             | -             | 8             | fail               | pass               | No                   |
| 422     | 9             | 9             | 9             | 8             | pass               | pass               | Yes                  |
| 423     | 5             | 9             | 9             | 8             | pass               | pass               | Yes                  |
| 424     | 3             | 3             | 10            | 8             | pass               | pass               | Yes                  |
| 425     | 7             | 6             | 8             | 8             | pass               | pass               | Yes                  |
| 426     | -             | 6             | 2             | 8             | fail               | pass               | No                   |
| 427     | 4             | 7             | 7             | 9             | pass               | pass               | Yes                  |
| 428     | 3             | 9             | 1             | 9             | pass               | pass               | Yes                  |
| 429     | 10            | 10            | 3             | 9             | pass               | pass               | Yes                  |
| 430     | 8             | 9             | 2             | 9             | pass               | pass               | Yes                  |
| 431     | 6             | 7             | 2             | 9             | pass               | pass               | Yes                  |
| 432     | 6             | 5             | 1             | 9             | pass               | pass               | Yes                  |
| 433     | 1             | 1             | 9             | 9             | pass               | pass               | Yes                  |
| 434     | 4             | 8             | 3             | 9             | pass               | pass               | Yes                  |
| 435     | 6             | 6             | 6             | 9             | pass               | pass               | Yes                  |
| 436     | 5             | 6             | 9             | 9             | pass               | pass               | Yes                  |
| 437     | 4             | 9             | 10            | 9             | pass               | pass               | Yes                  |
| 438     | 7             | 9             | 2             | 9             | pass               | pass               | Yes                  |
| 439     | -             | -             | -             | 9             | fail               | pass               | No                   |
| 440     | -             | -             | -             | 9             | fail               | pass               | No                   |
| 441     | 3             | 10            | 9             | 9             | pass               | pass               | Yes                  |
| 442     | 2             | 4             | 2             | 9             | pass               | pass               | Yes                  |
| 443     | 1             | 5             | 2             | 9             | pass               | pass               | Yes                  |
| 444     | 7             | 3             | 1             | 9             | pass               | pass               | Yes                  |
| 445     | 7             | 8             | 9             | 9             | pass               | pass               | Yes                  |
| 446     | -             | -             | -             | 9             | fail               | pass               | No                   |
| 447     | 4             | 6             | 7             | 9             | pass               | pass               | Yes                  |
| 448     | 7             | 2             | -             | 9             | fail               | pass               | No                   |
| 449     | 9             | 8             | 9             | 9             | pass               | pass               | Yes                  |
| 450     | 8             | 9             | 8             | 9             | pass               | pass               | Yes                  |
| 451     | 2             | 10            | 6             | 9             | pass               | pass               | Yes                  |
| 452     | 1             | 5             | -             | 9             | fail               | pass               | No                   |
| 453     | 2             | 5             | 5             | 9             | pass               | pass               | Yes                  |
| 454     | 3             | 6             | 6             | 9             | pass               | pass               | Yes                  |
| 455     | 10            | 5             | 1             | 9             | pass               | pass               | Yes                  |



| Bead ID | Protocol      |               |               |               | Inclusion Criteria |                    |                      |
|---------|---------------|---------------|---------------|---------------|--------------------|--------------------|----------------------|
|         | Split 1 media | Split 2 media | Split 3 media | Split 4 media | Tag deconvolution  | Flow sort criteria | Included in analysis |
| 456     | 3             | 4             | 7             | 9             | pass               | pass               | Yes                  |
| 457     | -             | -             | -             | 9             | fail               | pass               | No                   |
| 458     | 7             | 4             | 4             | 9             | pass               | pass               | Yes                  |
| 459     | -             | -             | -             | 9             | fail               | pass               | No                   |
| 460     | -             | -             | -             | 9             | fail               | pass               | No                   |
| 461     | 10            | 4             | 2             | 9             | pass               | pass               | Yes                  |
| 462     | 7             | 5             | 9             | 9             | pass               | pass               | Yes                  |
| 463     | 9             | 4             | 1             | 9             | pass               | pass               | Yes                  |
| 464     | 5             | -             | 6             | 9             | fail               | pass               | No                   |
| 465     | 6             | 10            | 1             | 9             | pass               | pass               | Yes                  |
| 466     | 10            | -             | -             | 9             | fail               | pass               | No                   |
| 467     | 1             | 5             | 1             | 9             | pass               | pass               | Yes                  |
| 468     | 6             | 8             | 5             | 9             | pass               | pass               | Yes                  |
| 469     | 2             | 4             | 1             | 9             | pass               | pass               | Yes                  |
| 470     | -             | -             | -             | 9             | fail               | pass               | No                   |
| 471     | -             | -             | -             | 9             | fail               | pass               | No                   |
| 472     | 5             | 2             | 8             | 9             | pass               | pass               | Yes                  |
| 473     | 7             | 7             | 3             | 9             | pass               | pass               | Yes                  |
| 474     | 10            | 5             | 5             | 9             | pass               | pass               | Yes                  |
| 475     | 2             | 5             | 1             | 9             | pass               | pass               | Yes                  |
| 476     | 5             | 10            | 9             | 9             | pass               | pass               | Yes                  |
| 477     | 5             | 10            | 7             | 9             | pass               | pass               | Yes                  |
| 478     | 7             | 6             | 1             | 9             | pass               | pass               | Yes                  |
| 479     | -             | -             | -             | 9             | fail               | pass               | No                   |
| 480     | 6             | 8             | 2             | 9             | pass               | pass               | Yes                  |
| 481     | 6             | 9             | 2             | 9             | pass               | pass               | Yes                  |
| 482     | 10            | 4             | 2             | 9             | pass               | pass               | Yes                  |
| 483     | 7             | -             | -             | 9             | fail               | pass               | No                   |
| 484     | 10            | 7             | 1             | 9             | pass               | pass               | Yes                  |
| 485     | 3             | 8             | 1             | 9             | pass               | pass               | Yes                  |
| 486     | -             | -             | -             | 9             | fail               | pass               | No                   |
| 487     | 2             | 9             | 7             | 9             | pass               | pass               | Yes                  |
| 488     | 5             | 9             | 2             | 9             | pass               | pass               | Yes                  |
| 489     | 5             | 9             | 7             | 9             | pass               | pass               | Yes                  |
| 490     | 7             | 6             | 1             | 9             | pass               | pass               | Yes                  |
| 491     | 9             | 5             | 6             | 9             | pass               | pass               | Yes                  |
| 492     | 5             | 2             | 7             | 9             | pass               | pass               | Yes                  |
| 493     | 4             | 7             | 5             | 9             | pass               | pass               | Yes                  |
| 494     | 3             | 3             | 10            | 9             | pass               | pass               | Yes                  |
| 495     | 8             | 7             | 4             | 9             | pass               | pass               | Yes                  |
| 496     | 8             | 7             | 7             | 9             | pass               | pass               | Yes                  |
| 497     | 3             | 9             | 2             | 9             | pass               | pass               | Yes                  |
| 498     | 3             | 7             | 5             | 9             | pass               | pass               | Yes                  |

| Bead ID | Protocol      |               |               |               | Inclusion Criteria |                    |                      |
|---------|---------------|---------------|---------------|---------------|--------------------|--------------------|----------------------|
|         | Split 1 media | Split 2 media | Split 3 media | Split 4 media | Tag deconvolution  | Flow sort criteria | Included in analysis |
| 499     | 3             | 5             | 9             | 9             | pass               | pass               | Yes                  |
| 500     | 9             | 1             | 1             | 9             | pass               | pass               | Yes                  |
| 501     | 7             | 9             | 1             | 9             | pass               | pass               | Yes                  |
| 502     | 2             | 6             | 9             | 9             | pass               | pass               | Yes                  |
| 503     | 3             | 5             | 5             | 9             | pass               | pass               | Yes                  |
| 504     | -             | -             | -             | 9             | fail               | pass               | No                   |
| 505     | 2             | 9             | 3             | 9             | pass               | pass               | Yes                  |
| 506     | -             | 9             | 8             | 9             | fail               | pass               | No                   |
| 507     | -             | -             | -             | 9             | fail               | pass               | No                   |
| 508     | 5             | 10            | 9             | 9             | pass               | pass               | Yes                  |
| 509     | 2             | 3             | 8             | 9             | pass               | pass               | Yes                  |
| 510     | 6             | 10            | 1             | 9             | pass               | pass               | Yes                  |
| 511     | 1             | 9             | 9             | 9             | pass               | pass               | Yes                  |
| 512     | 9             | 5             | 4             | 9             | pass               | pass               | Yes                  |
| 513     | 1             | 10            | 1             | 9             | pass               | pass               | Yes                  |
| 514     | 8             | 8             | 3             | 9             | pass               | pass               | Yes                  |
| 515     | 3             | -             | 3             | 9             | fail               | pass               | No                   |
| 516     | -             | -             | -             | 9             | fail               | pass               | No                   |
| 517     | 7             | 9             | 2             | 9             | pass               | pass               | Yes                  |
| 518     | 3             | 7             | 2             | 9             | pass               | pass               | Yes                  |
| 519     | -             | 5             | 5             | 9             | fail               | pass               | No                   |
| 520     | 3             | 9             | 2             | 10            | pass               | pass               | Yes                  |
| 521     | 1             | 1             | 10            | 9             | pass               | pass               | Yes                  |
| 522     | 6             | -             | 2             | 9             | fail               | pass               | No                   |
| 523     | 4             | 6             | 4             | 9             | pass               | pass               | Yes                  |
| 524     | 8             | 10            | 3             | 9             | pass               | pass               | Yes                  |
| 525     | -             | 3             | 2             | 9             | fail               | pass               | No                   |
| 526     | 7             | -             | 5             | 10            | fail               | pass               | No                   |
| 527     | 3             | 1             | 8             | 10            | pass               | pass               | Yes                  |
| 528     | 10            | 9             | 1             | 10            | pass               | pass               | Yes                  |
| 529     | 1             | 7             | 7             | 10            | pass               | pass               | Yes                  |
| 530     | 2             | 8             | 4             | 10            | pass               | pass               | Yes                  |
| 531     | -             | -             | -             | 10            | fail               | pass               | No                   |
| 532     | 9             | 2             | 8             | 10            | pass               | pass               | Yes                  |
| 533     | 5             | -             | 6             | 10            | fail               | pass               | No                   |
| 534     | -             | 8             | 6             | 10            | fail               | pass               | No                   |
| 535     | -             | 5             | 10            | 10            | fail               | pass               | No                   |
| 536     | 4             | 7             | 9             | 10            | pass               | pass               | Yes                  |
| 537     | 4             | 1             | 3             | 10            | pass               | pass               | Yes                  |
| 538     | 6             | 5             | 9             | 10            | pass               | pass               | Yes                  |
| 539     | 8             | 9             | 1             | 10            | pass               | pass               | Yes                  |

## 6. PROTOCOL ANALYSIS

### 6.2. LINKAGE ANALYSIS

A schematic diagram of the split-pool experiment is shown in Figure 5. Each rectangle corresponds to a cell culture medium and each row of rectangles corresponds to a split. The black upper number within each rectangle is the medium number and the grey number below is the number of beads within the analysis dataset that passed through that medium (the height of each rectangle is proportional to this number). The linkage lines between rectangles depict frequently occurring combinations of media resulting in an overlay of all protocols in the dataset. The opacity of the linkage lines is proportional to the number of protocols that feature a certain media combination (in this dataset, the darkest line corresponds to 21 beads).

**Figure 5:** Schematic diagram showing an overlay of all protocols in the analysis dataset. The darkest line corresponds to 21 beads passing between the 2 connected conditions.

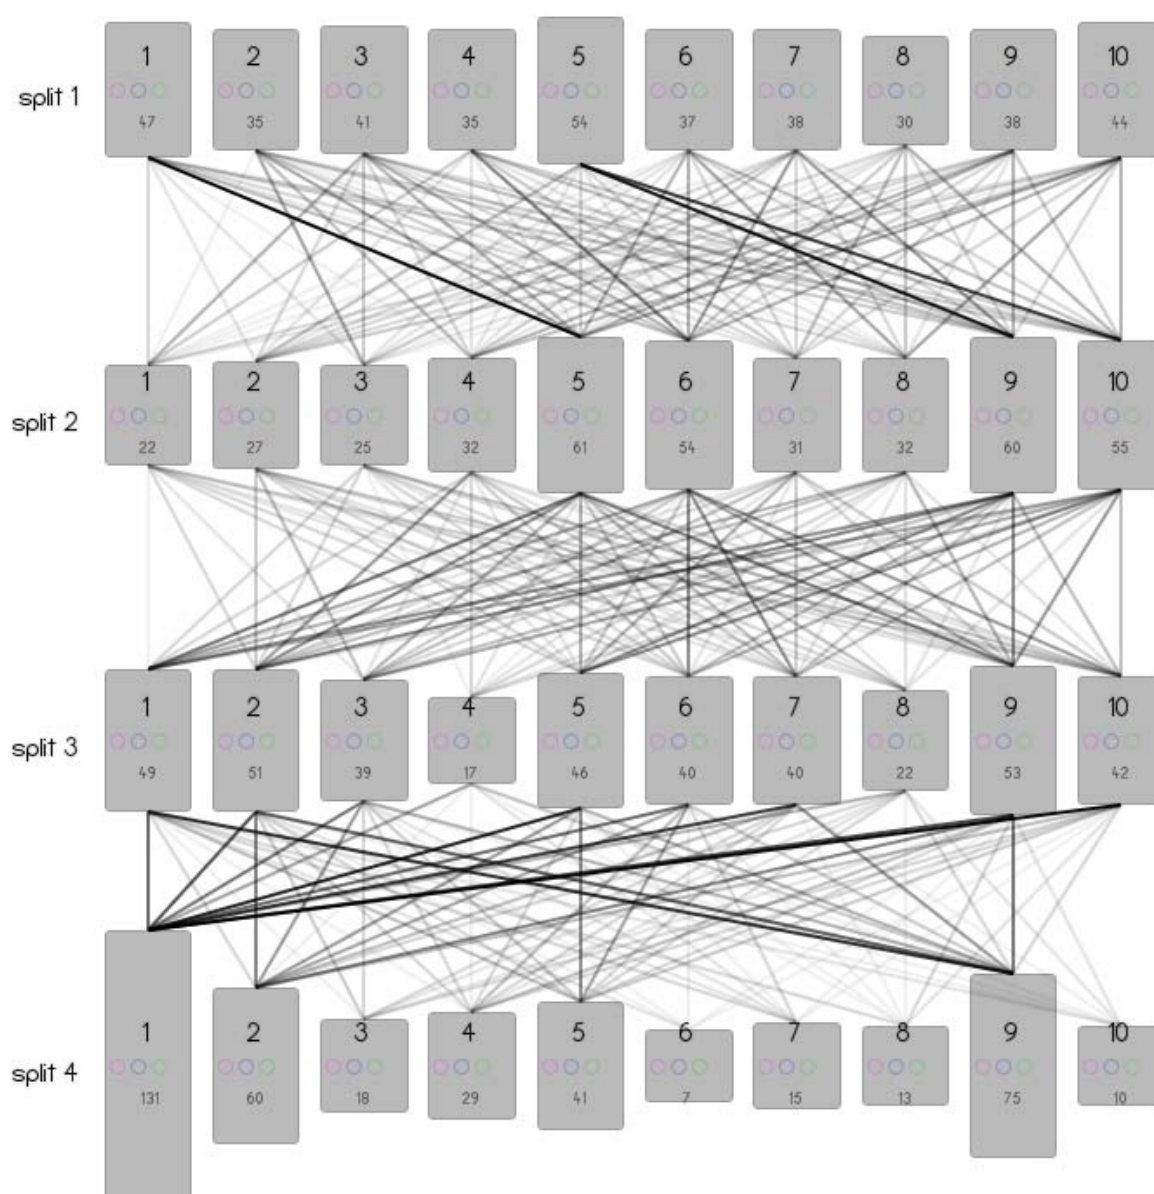

## 6. PROTOCOL ANALYSIS

### 6.3. FINGERPRINT ANALYSIS

Fingerprint analysis is a method of finding and comparing hits derived from identical protocols (i.e. four out of four matching cell culture media) and/or groups of beads with similar protocols (i.e. two or three matching media). This analysis method is complementary to linkage analysis which only considers linkages between adjacent splits.

Table 10 details a fingerprint analysis of the dataset. Each row of the table represents a group of hits clustered according to protocol similarity. Column 2 identifies how many cell culture media the group has in common; column 3 how many hits are included in the group; and column 4 the probability of the group occurring by chance. Columns 5 - 8 identify the common media in the groups ("-" represents divergence of media), and column 9 lists the bead IDs included in the group. The table is ordered first by probability value and then by number of media matches.

The group with the lowest probability of occurring by chance ( $p = 0.0000018$ ) is a group of 21 beads which share cell culture medium 1 (split 1) and medium 5 (split 2). A subset of 7 beads from this group with  $p = 0.00021298$  also shares medium 2 on the third split (group 10) and comprises two doublets of beads which have identical protocols (four out of four matching cell culture media). A second group of 7 beads which share media on three splits (split 1 = 4, split 2 = 6, split 4 = 1) is group 11. Group 11 is a subset of group 5 which share cell culture medium 6 (split 2) and medium 1 (split 4). These two groups contain a doublet of beads which have identical protocol 4-6-7-1.

**Table 10:** Fingerprint analysis of protocols. Each row of the table represents a cluster of similar protocols. The second column identifies the number of common cell culture media in a group, the third column the number of hits included in the group, the fourth column the probability of the group occurring by chance, columns 5-8 the identity of the common media ("-" represents divergence of media), and the final column lists the beads which yielded the protocols included in the group. The data is sorted first by probability value then by number of media matches.

| Group | Matches | Beads | Probability | Split 1 | Split 2 | Split 3 | Split 4 | Bead Ids                                                                           |
|-------|---------|-------|-------------|---------|---------|---------|---------|------------------------------------------------------------------------------------|
| 1     | 2       | 21    | 0.00000018  | 1       | 5       | -       | -       | 66,101,166,171,174,204,216,227,272,280,284,299,310,355,367,372,379,380,408,443,467 |
| 2     | 2       | 20    | 0.00000079  | 9       | -       | -       | 1       | 1,21,25,50,51,53,55,61,69,70,75,78,81,93,95,106,108,113,118,172                    |
| 3     | 2       | 20    | 0.00000079  | -       | -       | 10      | 1       | 19,48,56,65,71,78,82,88,113,125,130,140,145,150,158,159,164,169,172,181            |
| 4     | 2       | 19    | 0.00000373  | 5       | 9       | -       | -       | 26,71,121,126,135,173,198,223,246,261,271,318,328,340,350,366,423,488,489          |
| 5     | 2       | 18    | 0.00001877  | -       | 6       | -       | 1       | 5,9,18,32,37,55,56,77,79,83,86,117,130,136,139,160,175,178                         |
| 6     | 2       | 18    | 0.00001877  | -       | 10      | -       | 1       | 7,17,34,36,38,46,67,69,84,91,96,114,116,124,141,162,172,180                        |
| 7     | 2       | 18    | 0.00001877  | -       | -       | 5       | 1       | 1,17,25,27,36,40,42,46,84,126,135,151,167,173,175,176,180,183                      |
| 8     | 2       | 17    | 0.00008932  | -       | 9       | -       | 1       | 1,4,26,57,68,70,71,75,89,121,126,135,152,163,173,183,184                           |
| 9     | 2       | 17    | 0.00008932  | -       | -       | 1       | 9       | 428,432,444,455,463,465,467,469,475,478,484,485,490,500,501,510,513                |
| 10    | 3       | 7     | 0.00021298  | 1       | 5       | 2       | -       | 166,171,204,284,299,372,443                                                        |
| 11    | 3       | 7     | 0.00021298  | 4       | 6       | -       | 1       | 18,37,77,83,139,175,178                                                            |
| 12    | 3       | 7     | 0.00021298  | 5       | -       | 5       | 1       | 40,46,126,135,167,173,180                                                          |
| 13    | 2       | 16    | 0.00039853  | 5       | 10      | -       | -       | 46,141,180,186,208,212,252,262,278,294,373,388,399,476,477,508                     |
| 14    | 2       | 16    | 0.00039853  | -       | 5       | -       | 1       | 12,50,54,66,80,98,101,106,158,164,166,167,171,174,179,182                          |
| 15    | 2       | 16    | 0.00039853  | -       | -       | 7       | 1       | 5,32,35,51,52,53,55,77,87,96,106,112,136,139,152,174                               |
| 16    | 2       | 15    | 0.00167372  | 6       | -       | -       | 1       | 8,24,28,34,52,57,87,90,128,130,134,163,176,179,182                                 |
| 17    | 2       | 15    | 0.00167372  | 10      | -       | -       | 1       | 6,13,17,27,29,32,60,73,82,96,97,98,117,120,158                                     |

| Group | Matches | Beads | Probability | Split 1 | Split 2 | Split 3 | Split 4 | Bead Ids                                                |
|-------|---------|-------|-------------|---------|---------|---------|---------|---------------------------------------------------------|
| 18    | 2       | 15    | 0.00167372  | -       | -       | 9       | 1       | 4,18,23,26,28,29,75,80,90,101,120,124,155,160,170       |
| 19    | 3       | 6     | 0.0038501   | 5       | 9       | -       | 1       | 26,71,121,126,135,173                                   |
| 20    | 3       | 6     | 0.0038501   | -       | 6       | 7       | 1       | 5,32,55,77,136,139                                      |
| 21    | 3       | 6     | 0.0038501   | -       | 9       | 2       | 9       | 430,438,481,488,497,517                                 |
| 22    | 2       | 14    | 0.00658674  | 4       | -       | -       | 1       | 4,18,37,77,83,91,114,119,139,150,151,175,178,183        |
| 23    | 2       | 14    | 0.00658674  | 5       | -       | -       | 1       | 26,35,40,46,65,71,121,126,135,140,141,167,173,180       |
| 24    | 2       | 14    | 0.00658674  | -       | 7       | -       | 1       | 14,24,25,27,29,58,65,88,95,118,132,150,170,176          |
| 25    | 2       | 14    | 0.00658674  | -       | 9       | -       | 9       | 428,430,437,438,450,481,487,488,489,497,501,505,511,517 |
| 26    | 2       | 14    | 0.00658674  | -       | -       | 2       | 1       | 7,10,13,21,37,58,63,85,86,119,121,148,166,171           |
| 27    | 2       | 13    | 0.02407892  | 1       | -       | -       | 1       | 23,36,45,66,86,101,125,136,145,166,171,174,181          |
| 28    | 2       | 13    | 0.02407892  | 5       | -       | -       | 2       | 186,195,198,208,212,223,228,239,245,246,248,252,258     |
| 29    | 2       | 13    | 0.02407892  | -       | -       | 2       | 9       | 430,431,438,442,443,461,480,481,482,488,497,517,518     |
| 30    | 3       | 5     | 0.05762738  | 1       | 5       | 1       | -       | 66,355,379,408,467                                      |
| 31    | 3       | 5     | 0.05762738  | 1       | 5       | -       | 1       | 66,101,166,171,174                                      |
| 32    | 3       | 5     | 0.05762738  | 5       | 9       | 5       | -       | 126,135,173,223,340                                     |
| 33    | 3       | 5     | 0.05762738  | -       | 9       | 5       | 1       | 1,126,135,173,183                                       |
| 34    | 3       | 5     | 0.05762738  | -       | 10      | 5       | 1       | 17,36,46,84,180                                         |
| 35    | 2       | 12    | 0.08034176  | 8       | -       | -       | 1       | 10,38,85,88,112,124,155,160,161,162,164,170             |
| 36    | 2       | 12    | 0.08034176  | -       | 4       | -       | 1       | 6,21,40,52,81,108,112,125,129,148,151,161               |
| 37    | 2       | 12    | 0.08034176  | -       | 5       | -       | 9       | 432,443,453,455,462,467,474,475,491,499,503,512         |
| 38    | 2       | 12    | 0.08034176  | -       | 6       | -       | 2       | 187,190,194,201,203,206,209,211,213,219,235,248         |
| 39    | 2       | 12    | 0.08034176  | -       | 8       | -       | 1       | 8,13,23,63,82,85,93,97,128,134,155,169                  |
| 40    | 2       | 12    | 0.08034176  | -       | -       | 1       | 1       | 8,66,67,68,79,97,110,117,128,134,163,178                |
| 41    | 2       | 12    | 0.08034176  | -       | -       | 6       | 1       | 24,34,45,57,61,73,81,83,108,141,179,184                 |
| 42    | 4       | 3     | 0.09710944  | 5       | 9       | 5       | 1       | 126,135,173                                             |
| 43    | 4       | 3     | 0.09710944  | 6       | 8       | 1       | 1       | 8,128,134                                               |
| 44    | 2       | 11    | 0.23544554  | 2       | -       | -       | 1       | 12,42,54,67,80,84,129,132,147,148,184                   |
| 45    | 2       | 11    | 0.23544554  | 3       | -       | -       | 9       | 428,441,454,456,485,494,497,498,499,503,518             |
| 46    | 2       | 11    | 0.23544554  | 5       | -       | 9       | -       | 26,195,262,278,316,350,366,423,436,476,508              |
| 47    | 2       | 11    | 0.23544554  | -       | 5       | 1       | -       | 66,291,334,355,363,379,408,432,455,467,475              |
| 48    | 2       | 11    | 0.23544554  | -       | 10      | -       | 2       | 186,207,208,210,212,214,244,247,249,252,259             |
| 49    | 2       | 11    | 0.23544554  | -       | -       | 3       | 1       | 9,14,54,60,69,89,95,118,129,162,182                     |
| 50    | 2       | 11    | 0.23544554  | -       | -       | 9       | 9       | 433,436,441,445,449,462,476,499,502,508,511             |
| 51    | 3       | 4     | 0.53708327  | 5       | 9       | 2       | -       | 121,198,271,488                                         |
| 52    | 3       | 4     | 0.53708327  | 5       | 9       | 9       | -       | 26,350,366,423                                          |
| 53    | 3       | 4     | 0.53708327  | 5       | 9       | -       | 5       | 328,340,350,366                                         |
| 54    | 3       | 4     | 0.53708327  | 5       | 10      | 9       | -       | 262,278,476,508                                         |
| 55    | 3       | 4     | 0.53708327  | 5       | 10      | -       | 2       | 186,208,212,252                                         |
| 56    | 3       | 4     | 0.53708327  | 6       | -       | 1       | 1       | 8,128,134,163                                           |
| 57    | 3       | 4     | 0.53708327  | 6       | -       | 6       | 1       | 24,34,57,179                                            |
| 58    | 3       | 4     | 0.53708327  | 7       | 6       | 1       | -       | 393,411,478,490                                         |
| 59    | 3       | 4     | 0.53708327  | 7       | -       | 1       | 9       | 444,478,490,501                                         |
| 60    | 3       | 4     | 0.53708327  | 8       | -       | 9       | 1       | 124,155,160,170                                         |
| 61    | 3       | 4     | 0.53708327  | 9       | -       | 7       | 1       | 51,53,55,106                                            |
| 62    | 3       | 4     | 0.53708327  | -       | 5       | 1       | 9       | 432,455,467,475                                         |
| 63    | 3       | 4     | 0.53708327  | -       | 8       | 1       | 1       | 8,97,128,134                                            |
| 64    | 2       | 10    | 0.55245245  | 4       | 6       | -       | -       | 18,37,77,83,139,175,178,330,447,523                     |
| 65    | 2       | 10    | 0.55245245  | 7       | -       | -       | 9       | 438,444,445,458,462,473,478,490,501,517                 |
| 66    | 2       | 10    | 0.55245245  | -       | 5       | 9       | -       | 80,101,199,308,310,315,409,462,499,538                  |
| 67    | 2       | 10    | 0.55245245  | -       | 9       | 2       | -       | 121,198,271,430,438,481,488,497,517,520                 |
| 68    | 2       | 10    | 0.55245245  | -       | 9       | -       | 5       | 328,339,340,345,348,350,365,366,368,374                 |
| 69    | 2       | 10    | 0.55245245  | -       | 10      | -       | 9       | 429,441,451,465,476,477,508,510,513,524                 |
| 70    | 2       | 10    | 0.55245245  | -       | -       | 2       | 2       | 186,196,198,204,215,221,224,228,236,238                 |
| 71    | 2       | 10    | 0.55245245  | -       | -       | 9       | 2       | 188,194,195,199,201,211,234,240,244,247                 |

| Group | Matches | Beads | Probability | Split 1 | Split 2 | Split 3 | Split 4 | Bead Ids                            |
|-------|---------|-------|-------------|---------|---------|---------|---------|-------------------------------------|
| 72    | 2       | 9     | 0.89621097  | 2       | -       | -       | 9       | 442,451,453,469,475,487,502,505,509 |
| 73    | 2       | 9     | 0.89621097  | 3       | -       | -       | 1       | 9,14,48,63,68,79,89,116,159         |
| 74    | 2       | 9     | 0.89621097  | 5       | -       | 5       | -       | 40,46,126,135,167,173,180,223,340   |
| 75    | 2       | 9     | 0.89621097  | 10      | -       | 5       | -       | 17,27,210,220,283,285,358,361,474   |
| 76    | 2       | 9     | 0.89621097  | -       | 2       | -       | 1       | 10,19,35,60,61,73,113,120,145       |
| 77    | 2       | 9     | 0.89621097  | -       | 4       | -       | 2       | 185,188,193,215,218,242,243,245,251 |
| 78    | 2       | 9     | 0.89621097  | -       | 5       | 2       | -       | 166,171,204,238,281,284,299,372,443 |
| 79    | 2       | 9     | 0.89621097  | -       | 5       | -       | 2       | 199,204,216,220,227,229,237,238,258 |
| 80    | 2       | 9     | 0.89621097  | -       | 6       | 6       | -       | 83,219,248,306,342,398,412,435,454  |
| 81    | 2       | 9     | 0.89621097  | -       | 6       | 7       | -       | 5,32,55,77,136,139,203,301,447      |
| 82    | 2       | 9     | 0.89621097  | -       | 7       | -       | 9       | 427,431,473,484,493,495,496,498,518 |
| 83    | 2       | 9     | 0.89621097  | -       | 9       | 1       | -       | 68,163,246,261,365,428,501,528,539  |
| 84    | 2       | 9     | 0.89621097  | -       | 9       | 5       | -       | 1,126,135,173,183,223,283,298,340   |
| 85    | 2       | 9     | 0.89621097  | -       | 9       | 9       | -       | 4,26,75,348,350,366,422,423,511     |
| 86    | 2       | 9     | 0.89621097  | -       | 10      | 5       | -       | 17,36,46,84,180,207,210,259,389     |
| 87    | 2       | 9     | 0.89621097  | -       | -       | 5       | 5       | 326,327,330,340,353,356,358,361,375 |
| 88    | 2       | 8     | 0.99771118  | 1       | -       | 1       | -       | 66,355,365,379,408,420,467,513      |
| 89    | 2       | 8     | 0.99771118  | 1       | -       | 2       | -       | 86,166,171,204,284,299,372,443      |
| 90    | 2       | 8     | 0.99771118  | 1       | -       | -       | 4       | 284,288,298,299,305,310,312,323     |
| 91    | 2       | 8     | 0.99771118  | 4       | -       | 3       | -       | 189,214,321,331,376,396,434,537     |
| 92    | 2       | 8     | 0.99771118  | 5       | -       | -       | 9       | 436,472,476,477,488,489,492,508     |
| 93    | 2       | 8     | 0.99771118  | 6       | -       | 6       | -       | 24,34,57,179,242,398,412,435        |
| 94    | 2       | 8     | 0.99771118  | 6       | -       | -       | 9       | 431,432,435,465,468,480,481,510     |
| 95    | 2       | 8     | 0.99771118  | 7       | 6       | -       | -       | 5,56,306,393,411,425,478,490        |
| 96    | 2       | 8     | 0.99771118  | 7       | 9       | -       | -       | 152,339,348,386,410,438,501,517     |
| 97    | 2       | 8     | 0.99771118  | 7       | -       | -       | 1       | 5,7,19,56,58,110,152,169            |
| 98    | 2       | 8     | 0.99771118  | 10      | -       | 9       | -       | 29,120,194,211,240,308,387,406      |
| 99    | 2       | 8     | 0.99771118  | 10      | -       | -       | 2       | 193,194,203,210,211,217,220,240     |
| 100   | 2       | 8     | 0.99771118  | -       | 3       | -       | 1       | 45,53,78,87,90,110,147,181          |
| 101   | 2       | 8     | 0.99771118  | -       | 4       | 2       | -       | 21,148,215,268,364,442,461,482      |
| 102   | 2       | 8     | 0.99771118  | -       | 6       | 10      | -       | 56,130,190,209,265,276,329,383      |
| 103   | 2       | 8     | 0.99771118  | -       | 6       | -       | 9       | 435,436,447,454,478,490,502,523     |
| 104   | 2       | 8     | 0.99771118  | -       | 10      | 9       | -       | 124,244,247,262,278,441,476,508     |
| 105   | 2       | 8     | 0.99771118  | -       | -       | 3       | 2       | 189,200,206,208,213,214,216,258     |
| 106   | 2       | 8     | 0.99771118  | -       | -       | 5       | 2       | 187,207,210,220,223,235,253,259     |
| 107   | 2       | 8     | 0.99771118  | -       | -       | 7       | 9       | 427,447,456,477,487,489,492,496     |
| 108   | 4       | 2     | 0.99968117  | 1       | 5       | 2       | 1       | 166,171                             |
| 109   | 4       | 2     | 0.99968117  | 1       | 5       | 2       | 4       | 284,299                             |
| 110   | 4       | 2     | 0.99968117  | 3       | 1       | 10      | 1       | 48,159                              |
| 111   | 4       | 2     | 0.99968117  | 4       | 2       | 3       | 5       | 331,376                             |
| 112   | 4       | 2     | 0.99968117  | 4       | 6       | 7       | 1       | 77,139                              |
| 113   | 4       | 2     | 0.99968117  | 4       | 10      | 4       | 1       | 91,114                              |
| 114   | 4       | 2     | 0.99968117  | 5       | 9       | 9       | 5       | 350,366                             |
| 115   | 4       | 2     | 0.99968117  | 5       | 10      | 5       | 1       | 46,180                              |
| 116   | 4       | 2     | 0.99968117  | 5       | 10      | 9       | 3       | 262,278                             |
| 117   | 4       | 2     | 0.99968117  | 5       | 10      | 9       | 9       | 476,508                             |
| 118   | 4       | 2     | 0.99968117  | 6       | 10      | 1       | 9       | 465,510                             |
| 119   | 4       | 2     | 0.99968117  | 7       | 6       | 1       | 9       | 478,490                             |
| 120   | 4       | 2     | 0.99968117  | 7       | 9       | 2       | 9       | 438,517                             |
| 121   | 4       | 2     | 0.99968117  | 9       | 4       | 6       | 1       | 81,108                              |
| 122   | 4       | 2     | 0.99968117  | 9       | 7       | 3       | 1       | 95,118                              |
| 123   | 4       | 2     | 0.99968117  | 10      | 4       | 2       | 9       | 461,482                             |
| 124   | 4       | 2     | 0.99968117  | 10      | 6       | 9       | 2       | 194,211                             |
| 125   | 3       | 3     | 0.99979776  | 1       | 5       | 3       | -       | 216,280,380                         |
| 126   | 3       | 3     | 0.99979776  | 1       | 5       | -       | 2       | 204,216,227                         |
| 127   | 3       | 3     | 0.99979776  | 1       | 5       | -       | 4       | 284,299,310                         |
| 128   | 3       | 3     | 0.99979776  | 1       | 5       | -       | 5       | 355,367,372                         |
| 129   | 3       | 3     | 0.99979776  | 1       | -       | 2       | 1       | 86,166,171                          |
| 130   | 3       | 3     | 0.99979776  | 1       | -       | 10      | 1       | 125,145,181                         |
| 131   | 3       | 3     | 0.99979776  | 2       | 3       | 8       | -       | 147,270,509                         |
| 132   | 3       | 3     | 0.99979776  | 2       | 4       | 2       | -       | 148,364,442                         |

| Group | Matches | Beads | Probability | Split 1 | Split 2 | Split 3 | Split 4 | Bead Ids                    |
|-------|---------|-------|-------------|---------|---------|---------|---------|-----------------------------|
| 133   | 3       | 3     | 0.99979776  | 2       | 5       | -       | 1       | 12,54,80                    |
| 134   | 3       | 3     | 0.99979776  | 3       | -       | 3       | 1       | 9,14,89                     |
| 135   | 3       | 3     | 0.99979776  | 4       | 6       | 7       | -       | 77,139,447                  |
| 136   | 3       | 3     | 0.99979776  | 4       | -       | 5       | 1       | 151,175,183                 |
| 137   | 3       | 3     | 0.99979776  | 5       | 9       | -       | 2       | 198,223,246                 |
| 138   | 3       | 3     | 0.99979776  | 5       | 10      | 6       | -       | 141,294,373                 |
| 139   | 3       | 3     | 0.99979776  | 5       | 10      | -       | 1       | 46,141,180                  |
| 140   | 3       | 3     | 0.99979776  | 5       | 10      | -       | 9       | 476,477,508                 |
| 141   | 3       | 3     | 0.99979776  | 5       | -       | 2       | 2       | 186,198,228                 |
| 142   | 3       | 3     | 0.99979776  | 5       | -       | 6       | 5       | 328,347,373                 |
| 143   | 3       | 3     | 0.99979776  | 5       | -       | 7       | 9       | 477,489,492                 |
| 144   | 3       | 3     | 0.99979776  | 5       | -       | 9       | 9       | 436,476,508                 |
| 145   | 3       | 3     | 0.99979776  | 5       | -       | 10      | 1       | 65,71,140                   |
| 146   | 3       | 3     | 0.99979776  | 6       | 6       | 6       | -       | 398,412,435                 |
| 147   | 3       | 3     | 0.99979776  | 6       | 8       | 1       | -       | 8,128,134                   |
| 148   | 3       | 3     | 0.99979776  | 6       | 8       | -       | 1       | 8,128,134                   |
| 149   | 3       | 3     | 0.99979776  | 6       | -       | 1       | 9       | 432,465,510                 |
| 150   | 3       | 3     | 0.99979776  | 6       | -       | 2       | 9       | 431,480,481                 |
| 151   | 3       | 3     | 0.99979776  | 7       | 9       | -       | 9       | 438,501,517                 |
| 152   | 3       | 3     | 0.99979776  | 7       | -       | 10      | 1       | 19,56,169                   |
| 153   | 3       | 3     | 0.99979776  | 8       | 10      | -       | 1       | 38,124,162                  |
| 154   | 3       | 3     | 0.99979776  | 9       | 4       | -       | 1       | 21,81,108                   |
| 155   | 3       | 3     | 0.99979776  | 9       | 7       | -       | 1       | 25,95,118                   |
| 156   | 3       | 3     | 0.99979776  | 9       | 9       | -       | 1       | 1,70,75                     |
| 157   | 3       | 3     | 0.99979776  | 9       | -       | 3       | 1       | 69,95,118                   |
| 158   | 3       | 3     | 0.99979776  | 9       | -       | 6       | 1       | 61,81,108                   |
| 159   | 3       | 3     | 0.99979776  | 9       | -       | 10      | 1       | 78,113,172                  |
| 160   | 3       | 3     | 0.99979776  | 10      | 2       | -       | 1       | 60,73,120                   |
| 161   | 3       | 3     | 0.99979776  | 10      | 5       | 5       | -       | 220,358,474                 |
| 162   | 3       | 3     | 0.99979776  | 10      | 6       | -       | 2       | 194,203,211                 |
| 163   | 3       | 3     | 0.99979776  | 10      | 8       | -       | 1       | 13,82,97                    |
| 164   | 3       | 3     | 0.99979776  | 10      | -       | 9       | 2       | 194,211,240                 |
| 165   | 3       | 3     | 0.99979776  | -       | 1       | 10      | 1       | 48,140,159                  |
| 166   | 3       | 3     | 0.99979776  | -       | 2       | 5       | 5       | 327,353,361                 |
| 167   | 3       | 3     | 0.99979776  | -       | 2       | 10      | 1       | 19,113,145                  |
| 168   | 3       | 3     | 0.99979776  | -       | 4       | 2       | 9       | 442,461,482                 |
| 169   | 3       | 3     | 0.99979776  | -       | 5       | 1       | 5       | 334,355,363                 |
| 170   | 3       | 3     | 0.99979776  | -       | 5       | 5       | 9       | 453,474,503                 |
| 171   | 3       | 3     | 0.99979776  | -       | 5       | 9       | 4       | 308,310,315                 |
| 172   | 3       | 3     | 0.99979776  | -       | 6       | 1       | 1       | 79,117,178                  |
| 173   | 3       | 3     | 0.99979776  | -       | 6       | 9       | 2       | 194,201,211                 |
| 174   | 3       | 3     | 0.99979776  | -       | 7       | 3       | 1       | 14,95,118                   |
| 175   | 3       | 3     | 0.99979776  | -       | 7       | 5       | 1       | 25,27,176                   |
| 176   | 3       | 3     | 0.99979776  | -       | 7       | 10      | 1       | 65,88,150                   |
| 177   | 3       | 3     | 0.99979776  | -       | 8       | 2       | 1       | 13,63,85                    |
| 178   | 3       | 3     | 0.99979776  | -       | 9       | 9       | 1       | 4,26,75                     |
| 179   | 3       | 3     | 0.99979776  | -       | 9       | 9       | 5       | 348,350,366                 |
| 180   | 3       | 3     | 0.99979776  | -       | 10      | 1       | 9       | 465,510,513                 |
| 181   | 3       | 3     | 0.99979776  | -       | 10      | 4       | 1       | 91,114,116                  |
| 182   | 3       | 3     | 0.99979776  | -       | 10      | 5       | 2       | 207,210,259                 |
| 183   | 3       | 3     | 0.99979776  | -       | 10      | 9       | 9       | 441,476,508                 |
| 184   | 2       | 7     | 0.99999988  | 1       | -       | -       | 5       | 342,355,365,367,368,372,378 |
| 185   | 2       | 7     | 0.99999988  | 2       | 3       | -       | -       | 147,197,255,270,390,413,509 |
| 186   | 2       | 7     | 0.99999988  | 2       | 5       | -       | -       | 12,54,80,315,418,453,475    |
| 187   | 2       | 7     | 0.99999988  | 3       | -       | 2       | -       | 63,281,287,382,497,518,520  |
| 188   | 2       | 7     | 0.99999988  | 3       | -       | -       | 2       | 185,190,199,201,237,251,253 |
| 189   | 2       | 7     | 0.99999988  | 5       | -       | 2       | -       | 121,186,198,228,271,402,488 |
| 190   | 2       | 7     | 0.99999988  | 5       | -       | 6       | -       | 141,239,248,294,328,347,373 |
| 191   | 2       | 7     | 0.99999988  | 6       | 8       | -       | -       | 8,128,134,221,317,468,480   |
| 192   | 2       | 7     | 0.99999988  | 6       | -       | 1       | -       | 8,128,134,163,432,465,510   |
| 193   | 2       | 7     | 0.99999988  | 7       | -       | 1       | -       | 110,393,411,444,478,490,501 |

| Group | Matches | Beads | Probability | Split 1 | Split 2 | Split 3 | Split 4 | Bead Ids                    |
|-------|---------|-------|-------------|---------|---------|---------|---------|-----------------------------|
| 194   | 2       | 7     | 0.99999988  | 7       | -       | 2       | -       | 7,58,215,268,274,438,517    |
| 195   | 2       | 7     | 0.99999988  | 10      | 5       | -       | -       | 98,158,220,308,358,455,474  |
| 196   | 2       | 7     | 0.99999988  | 10      | 8       | -       | -       | 13,82,97,217,240,282,295    |
| 197   | 2       | 7     | 0.99999988  | -       | 1       | -       | 1       | 28,42,48,51,119,140,159     |
| 198   | 2       | 7     | 0.99999988  | -       | 2       | -       | 5       | 327,331,338,347,353,361,376 |
| 199   | 2       | 7     | 0.99999988  | -       | 4       | -       | 9       | 442,456,458,461,463,469,482 |
| 200   | 2       | 7     | 0.99999988  | -       | 5       | -       | 4       | 284,291,299,304,308,310,315 |
| 201   | 2       | 7     | 0.99999988  | -       | 6       | 1       | -       | 79,117,178,393,411,478,490  |
| 202   | 2       | 7     | 0.99999988  | -       | 6       | 9       | -       | 18,160,194,201,211,436,502  |
| 203   | 2       | 7     | 0.99999988  | -       | 8       | -       | 9       | 434,445,449,468,480,485,514 |
| 204   | 2       | 7     | 0.99999988  | -       | 10      | 1       | -       | 67,337,388,399,465,510,513  |
| 205   | 2       | 7     | 0.99999988  | -       | 10      | 3       | -       | 69,162,208,214,277,429,524  |
| 206   | 2       | 7     | 0.99999988  | -       | -       | 4       | 1       | 6,12,70,91,114,116,132      |
| 207   | 2       | 7     | 0.99999988  | -       | -       | 6       | 2       | 219,222,227,239,242,248,251 |
| 208   | 2       | 7     | 0.99999988  | -       | -       | 6       | 5       | 328,339,342,347,349,351,373 |
| 209   | 2       | 6     | 0.99999999  | 1       | -       | 7       | -       | 136,174,272,312,368,529     |
| 210   | 2       | 6     | 0.99999999  | 1       | -       | 9       | -       | 23,101,288,310,433,511      |
| 211   | 2       | 6     | 0.99999999  | 1       | -       | 10      | -       | 125,145,181,266,367,521     |
| 212   | 2       | 6     | 0.99999999  | 1       | -       | -       | 9       | 433,443,467,511,513,521     |
| 213   | 2       | 6     | 0.99999999  | 3       | 1       | -       | -       | 48,159,286,326,382,527      |
| 214   | 2       | 6     | 0.99999999  | 3       | 5       | -       | -       | 199,237,260,281,499,503     |
| 215   | 2       | 6     | 0.99999999  | 3       | 6       | -       | -       | 9,79,190,201,377,454        |
| 216   | 2       | 6     | 0.99999999  | 3       | -       | 10      | -       | 48,159,190,309,424,494      |
| 217   | 2       | 6     | 0.99999999  | 4       | -       | -       | 9       | 427,434,437,447,493,523     |
| 218   | 2       | 6     | 0.99999999  | 5       | -       | 1       | -       | 246,261,291,384,388,399     |
| 219   | 2       | 6     | 0.99999999  | 5       | -       | 7       | -       | 35,212,245,477,489,492      |
| 220   | 2       | 6     | 0.99999999  | 5       | -       | -       | 5       | 328,340,347,350,366,373     |
| 221   | 2       | 6     | 0.99999999  | 6       | 5       | -       | -       | 179,182,229,238,432,538     |
| 222   | 2       | 6     | 0.99999999  | 6       | 6       | -       | -       | 130,213,329,398,412,435     |
| 223   | 2       | 6     | 0.99999999  | 6       | -       | -       | 2       | 213,221,229,234,238,242     |
| 224   | 2       | 6     | 0.99999999  | 8       | 10      | -       | -       | 38,124,162,244,394,524      |
| 225   | 2       | 6     | 0.99999999  | 8       | -       | 9       | -       | 124,155,160,170,244,409     |
| 226   | 2       | 6     | 0.99999999  | 8       | -       | -       | 9       | 430,450,495,496,514,524     |
| 227   | 2       | 6     | 0.99999999  | 9       | 4       | -       | -       | 21,81,108,188,263,463       |
| 228   | 2       | 6     | 0.99999999  | 9       | 5       | -       | -       | 50,106,264,363,491,512      |
| 229   | 2       | 6     | 0.99999999  | 9       | 9       | -       | -       | 1,70,75,307,374,422         |
| 230   | 2       | 6     | 0.99999999  | 9       | -       | 6       | -       | 61,81,108,219,351,491       |
| 231   | 2       | 6     | 0.99999999  | 9       | -       | 10      | -       | 78,113,172,307,374,383      |
| 232   | 2       | 6     | 0.99999999  | 10      | 6       | -       | -       | 32,117,194,203,211,344      |
| 233   | 2       | 6     | 0.99999999  | 10      | 10      | -       | -       | 17,96,210,337,370,429       |
| 234   | 2       | 6     | 0.99999999  | 10      | -       | 1       | -       | 97,117,337,455,484,528      |
| 235   | 2       | 6     | 0.99999999  | 10      | -       | -       | 5       | 337,344,349,358,361,370     |
| 236   | 2       | 6     | 0.99999999  | 10      | -       | -       | 9       | 429,455,461,474,482,484     |
| 237   | 2       | 6     | 0.99999999  | -       | 5       | 3       | -       | 54,182,216,258,280,380      |
| 238   | 2       | 6     | 0.99999999  | -       | 5       | 5       | -       | 167,220,358,453,474,503     |
| 239   | 2       | 6     | 0.99999999  | -       | 5       | -       | 5       | 334,355,358,363,367,372     |
| 240   | 2       | 6     | 0.99999999  | -       | 6       | -       | 5       | 329,330,342,344,377,378     |
| 241   | 2       | 6     | 0.99999999  | -       | 7       | 5       | -       | 25,27,176,356,493,498       |
| 242   | 2       | 6     | 0.99999999  | -       | 8       | 1       | -       | 8,97,128,134,420,485        |
| 243   | 2       | 6     | 0.99999999  | -       | 8       | 9       | -       | 23,155,195,240,445,449      |
| 244   | 2       | 6     | 0.99999999  | -       | 10      | 6       | -       | 34,141,294,373,394,451      |
| 245   | 2       | 6     | 0.99999999  | -       | -       | 3       | 9       | 429,434,473,505,514,524     |
| 246   | 2       | 6     | 0.99999999  | -       | -       | 5       | 9       | 453,468,474,493,498,503     |
| 247   | 2       | 6     | 0.99999999  | -       | -       | 8       | 1       | 38,50,93,98,147,161         |
| 248   | 2       | 5     | 0.99999999  | 1       | 6       | -       | -       | 86,136,235,342,378          |
| 249   | 2       | 5     | 0.99999999  | 1       | -       | 6       | -       | 45,227,305,323,342          |
| 250   | 2       | 5     | 0.99999999  | 2       | 4       | -       | -       | 129,148,364,442,469         |
| 251   | 2       | 5     | 0.99999999  | 2       | -       | 3       | -       | 54,129,200,206,505          |
| 252   | 2       | 5     | 0.99999999  | 2       | -       | 5       | -       | 42,84,259,413,453           |
| 253   | 2       | 5     | 0.99999999  | 2       | -       | -       | 2       | 197,200,206,255,259         |
| 254   | 2       | 5     | 0.99999999  | 3       | 9       | -       | -       | 68,89,428,497,520           |



| Group | Matches | Beads | Probability | Split 1 | Split 2 | Split 3 | Split 4 | Bead Ids            |
|-------|---------|-------|-------------|---------|---------|---------|---------|---------------------|
| 255   | 2       | 5     | 0.99999999  | 3       | -       | 1       | -       | 68,79,185,428,485   |
| 256   | 2       | 5     | 0.99999999  | 3       | -       | 3       | -       | 9,14,89,377,397     |
| 257   | 2       | 5     | 0.99999999  | 3       | -       | 5       | -       | 253,326,353,498,503 |
| 258   | 2       | 5     | 0.99999999  | 4       | 9       | -       | -       | 4,183,189,345,437   |
| 259   | 2       | 5     | 0.99999999  | 4       | -       | 5       | -       | 151,175,183,330,493 |
| 260   | 2       | 5     | 0.99999999  | 4       | -       | 7       | -       | 77,139,249,427,447  |
| 261   | 2       | 5     | 0.99999999  | 4       | -       | -       | 2       | 189,196,214,243,249 |
| 262   | 2       | 5     | 0.99999999  | 4       | -       | -       | 5       | 330,331,334,345,376 |
| 263   | 2       | 5     | 0.99999999  | 5       | 2       | -       | -       | 35,228,347,472,492  |
| 264   | 2       | 5     | 0.99999999  | 6       | 10      | -       | -       | 34,303,343,465,510  |
| 265   | 2       | 5     | 0.99999999  | 6       | -       | 2       | -       | 221,238,431,480,481 |
| 266   | 2       | 5     | 0.99999999  | 7       | -       | 6       | -       | 222,306,339,386,403 |
| 267   | 2       | 5     | 0.99999999  | 7       | -       | -       | 5       | 338,339,348,356,375 |
| 268   | 2       | 5     | 0.99999999  | 8       | 7       | -       | -       | 88,170,357,495,496  |
| 269   | 2       | 5     | 0.99999999  | 8       | -       | 2       | -       | 10,85,224,236,430   |
| 270   | 2       | 5     | 0.99999999  | 8       | -       | 10      | -       | 88,164,209,265,404  |
| 271   | 2       | 5     | 0.99999999  | 8       | -       | -       | 2       | 187,209,224,236,244 |
| 272   | 2       | 5     | 0.99999999  | 9       | -       | 7       | -       | 51,53,55,106,264    |
| 273   | 2       | 5     | 0.99999999  | 9       | -       | 9       | -       | 75,188,247,422,449  |
| 274   | 2       | 5     | 0.99999999  | 9       | -       | -       | 9       | 449,463,491,500,512 |
| 275   | 2       | 5     | 0.99999999  | 10      | 4       | -       | -       | 6,193,406,461,482   |
| 276   | 2       | 5     | 0.99999999  | 10      | -       | 7       | -       | 32,96,203,217,282   |
| 277   | 2       | 5     | 0.99999999  | 10      | -       | -       | 4       | 282,283,285,295,308 |
| 278   | 2       | 5     | 0.99999999  | -       | 2       | 3       | -       | 60,319,331,376,397  |
| 279   | 2       | 5     | 0.99999999  | -       | 3       | 10      | -       | 78,181,197,424,494  |
| 280   | 2       | 5     | 0.99999999  | -       | 3       | -       | 2       | 197,222,236,253,255 |
| 281   | 2       | 5     | 0.99999999  | -       | 5       | 7       | -       | 106,174,264,272,418 |
| 282   | 2       | 5     | 0.99999999  | -       | 5       | 8       | -       | 50,98,229,237,260   |
| 283   | 2       | 5     | 0.99999999  | -       | 5       | -       | 3       | 260,264,272,280,281 |
| 284   | 2       | 5     | 0.99999999  | -       | 7       | 3       | -       | 14,95,118,357,473   |
| 285   | 2       | 5     | 0.99999999  | -       | 8       | 2       | -       | 13,63,85,221,480    |
| 286   | 2       | 5     | 0.99999999  | -       | 8       | -       | 4       | 282,295,305,317,321 |
| 287   | 2       | 5     | 0.99999999  | -       | 9       | 3       | -       | 89,189,200,318,505  |
| 288   | 2       | 5     | 0.99999999  | -       | 9       | 6       | -       | 57,184,328,339,386  |
| 289   | 2       | 5     | 0.99999999  | -       | 9       | 10      | -       | 71,307,374,410,437  |
| 290   | 2       | 5     | 0.99999999  | -       | 9       | -       | 2       | 189,198,200,223,246 |
| 291   | 2       | 5     | 0.99999999  | -       | 10      | 7       | -       | 96,212,249,312,477  |
| 292   | 2       | 5     | 0.99999999  | -       | 10      | 10      | -       | 172,252,303,309,343 |
| 293   | 2       | 5     | 0.99999999  | -       | -       | 1       | 5       | 334,337,355,363,365 |
| 294   | 2       | 5     | 0.99999999  | -       | -       | 6       | 4       | 294,304,305,306,323 |
| 295   | 2       | 5     | 0.99999999  | -       | -       | 7       | 2       | 203,212,217,245,249 |
| 296   | 2       | 5     | 0.99999999  | -       | -       | 9       | 4       | 288,308,310,315,316 |
| 297   | 2       | 5     | 0.99999999  | -       | -       | 10      | 2       | 190,197,209,243,252 |
| 298   | 2       | 4     | 0.99999999  | 1       | 9       | -       | -       | 298,365,368,511     |
| 299   | 2       | 4     | 0.99999999  | 1       | 10      | -       | -       | 36,312,389,513      |
| 300   | 2       | 4     | 0.99999999  | 1       | -       | 5       | -       | 36,235,298,389      |
| 301   | 2       | 4     | 0.99999999  | 1       | -       | -       | 2       | 204,216,227,235     |
| 302   | 2       | 4     | 0.99999999  | 2       | 6       | -       | -       | 206,276,301,502     |
| 303   | 2       | 4     | 0.99999999  | 2       | 9       | -       | -       | 184,200,487,505     |
| 304   | 2       | 4     | 0.99999999  | 2       | 10      | -       | -       | 67,84,259,451       |
| 305   | 2       | 4     | 0.99999999  | 2       | -       | 1       | -       | 67,255,469,475      |
| 306   | 2       | 4     | 0.99999999  | 2       | -       | 2       | -       | 148,364,390,442     |
| 307   | 2       | 4     | 0.99999999  | 2       | -       | 7       | -       | 301,341,418,487     |
| 308   | 2       | 4     | 0.99999999  | 3       | 3       | -       | -       | 253,405,424,494     |
| 309   | 2       | 4     | 0.99999999  | 3       | -       | 8       | -       | 237,260,286,527     |
| 310   | 2       | 4     | 0.99999999  | 3       | -       | 9       | -       | 199,201,441,499     |
| 311   | 2       | 4     | 0.99999999  | 4       | 1       | -       | -       | 119,196,396,537     |
| 312   | 2       | 4     | 0.99999999  | 4       | 7       | -       | -       | 150,427,493,536     |
| 313   | 2       | 4     | 0.99999999  | 4       | 10      | -       | -       | 91,114,214,249      |
| 314   | 2       | 4     | 0.99999999  | 5       | -       | 10      | -       | 65,71,140,252       |
| 315   | 2       | 4     | 0.99999999  | 5       | -       | -       | 3       | 261,262,271,278     |

| Group | Matches | Beads | Probability | Split 1 | Split 2 | Split 3 | Split 4 | Bead Ids        |
|-------|---------|-------|-------------|---------|---------|---------|---------|-----------------|
| 316   | 2       | 4     | 0.99999999  | 5       | -       | -       | 4       | 291,294,316,318 |
| 317   | 2       | 4     | 0.99999999  | 6       | -       | 9       | -       | 28,90,234,538   |
| 318   | 2       | 4     | 0.99999999  | 6       | -       | 10      | -       | 130,303,329,343 |
| 319   | 2       | 4     | 0.99999999  | 7       | 3       | -       | -       | 110,222,403,444 |
| 320   | 2       | 4     | 0.99999999  | 7       | 4       | -       | -       | 215,218,268,458 |
| 321   | 2       | 4     | 0.99999999  | 7       | -       | 7       | -       | 5,152,267,338   |
| 322   | 2       | 4     | 0.99999999  | 7       | -       | 10      | -       | 19,56,169,410   |
| 323   | 2       | 4     | 0.99999999  | 7       | -       | -       | 3       | 267,268,274,277 |
| 324   | 2       | 4     | 0.99999999  | 8       | 6       | -       | -       | 160,187,209,265 |
| 325   | 2       | 4     | 0.99999999  | 8       | 8       | -       | -       | 85,155,400,514  |
| 326   | 2       | 4     | 0.99999999  | 8       | -       | 3       | -       | 162,357,514,524 |
| 327   | 2       | 4     | 0.99999999  | 9       | 10      | -       | -       | 69,172,207,247  |
| 328   | 2       | 4     | 0.99999999  | 9       | -       | 3       | -       | 69,95,118,263   |
| 329   | 2       | 4     | 0.99999999  | 9       | -       | -       | 2       | 188,207,219,247 |
| 330   | 2       | 4     | 0.99999999  | 10      | 2       | -       | -       | 60,73,120,361   |
| 331   | 2       | 4     | 0.99999999  | 10      | -       | 2       | -       | 13,344,461,482  |
| 332   | 2       | 4     | 0.99999999  | -       | 1       | 10      | -       | 48,140,159,521  |
| 333   | 2       | 4     | 0.99999999  | -       | 2       | 2       | -       | 10,224,228,287  |
| 334   | 2       | 4     | 0.99999999  | -       | 2       | 10      | -       | 19,113,145,404  |
| 335   | 2       | 4     | 0.99999999  | -       | 3       | -       | 7       | 390,402,403,405 |
| 336   | 2       | 4     | 0.99999999  | -       | 4       | 6       | -       | 81,108,242,251  |
| 337   | 2       | 4     | 0.99999999  | -       | 4       | 7       | -       | 52,112,245,456  |
| 338   | 2       | 4     | 0.99999999  | -       | 5       | 6       | -       | 179,227,304,491 |
| 339   | 2       | 4     | 0.99999999  | -       | 6       | 3       | -       | 9,206,213,377   |
| 340   | 2       | 4     | 0.99999999  | -       | 6       | 5       | -       | 175,187,235,330 |
| 341   | 2       | 4     | 0.99999999  | -       | 7       | 7       | -       | 341,427,496,529 |
| 342   | 2       | 4     | 0.99999999  | -       | 7       | 10      | -       | 65,88,150,266   |
| 343   | 2       | 4     | 0.99999999  | -       | 8       | -       | 2       | 195,217,221,240 |
| 344   | 2       | 4     | 0.99999999  | -       | 9       | 7       | -       | 152,368,487,489 |
| 345   | 2       | 4     | 0.99999999  | -       | 9       | -       | 4       | 283,298,307,318 |
| 346   | 2       | 4     | 0.99999999  | -       | 9       | -       | 8       | 391,410,422,423 |
| 347   | 2       | 4     | 0.99999999  | -       | 10      | -       | 3       | 262,274,277,278 |
| 348   | 2       | 4     | 0.99999999  | -       | 10      | -       | 4       | 294,303,309,312 |
| 349   | 2       | 4     | 0.99999999  | -       | 10      | -       | 5       | 337,343,370,373 |
| 350   | 2       | 4     | 0.99999999  | -       | -       | 2       | 3       | 268,271,274,281 |
| 351   | 2       | 4     | 0.99999999  | -       | -       | 3       | 5       | 331,357,376,377 |
| 352   | 2       | 4     | 0.99999999  | -       | -       | 4       | 9       | 458,495,512,523 |
| 353   | 2       | 4     | 0.99999999  | -       | -       | 6       | 9       | 435,451,454,491 |
| 354   | 2       | 4     | 0.99999999  | -       | -       | 10      | 5       | 329,343,367,374 |

## 6. PROTOCOL ANALYSIS

### 6.4. HIERACHICAL CLUSTERING DENDROGRAM

Hierarchical clustering is a method of grouping protocols according to similarity.

The hierarchical clustering illustrated in figure 6 has two sections. The upper dendrogram depicts the clustering structure and order. The lower coloured array is a graphical representation of the media combinations that comprise each protocol. The y-axis of the dendrogram measures intra-cluster similarity, i.e. horizontal bars closest to the bottom of the dendrogram link identical protocols whilst a horizontal bar half way up the y-axis represents a larger cluster containing beads whose protocols are not identical but do share some similarity. The hierarchical nature of the clustering means that beads are first clustered into small highly similar clusters, which are in turn included in larger clusters. This is repeated until the final cluster is reached (uppermost horizontal bar) which includes all beads in the dataset. Each node at the bottom of the dendrogram (leaf node) corresponds to a protocol. Each row of the coloured array corresponds to a split and each column of the array a protocol, with the columns aligned to the leaf nodes of the dendrogram. The horizontal coloured legend below the array specifies the colour associated with each media number.

Three large clusters within the dataset are labeled A, B and C. Cluster A is the largest and includes 109 beads which predominantly share cell culture medium 1 on the final split and comprises one triplet and 6 doublet of beads which have identical protocols (four out of four matching cell culture media). Cluster B contains 69 beads, which predominately end in media 9 (split 4), and also contains two subset of beads, one with 14 beads also sharing media 9 (split 2), and second containing 11 beads sharing media 9 (split 3). Each subset also comprises a doublet of beads which have identical protocols (protocols 7-9-2-9 and 5-10-9-9). Cluster C contains 34 beads, 20 of which share cell culture medium 1 (split 1) and medium 5 (split 2). This cluster is the same as group 1 of the fingerprint analysis (table 9) and the strongest linkage line in figure 5. Cluster C also includes two doublets of beads which have identical protocols. The probabilities of these groups occurring by chance are discussed in section 6.3.

**Figure 6:** Dendrogram showing the hierarchical clustering of similar protocols.

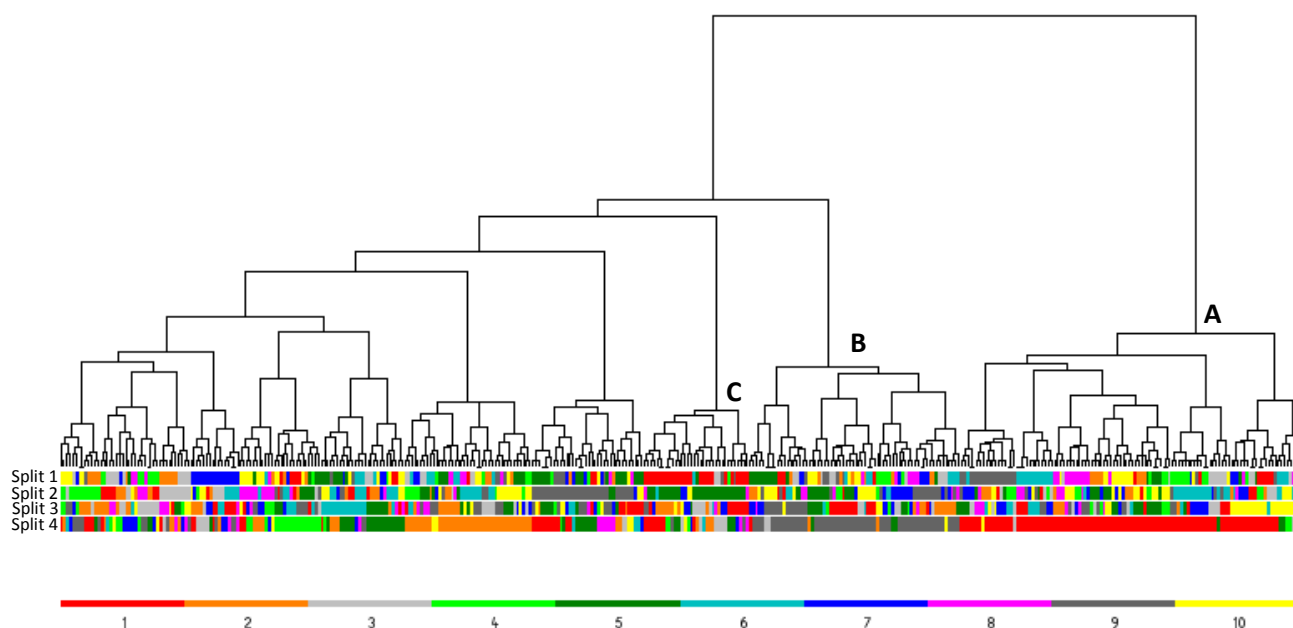

## 6. PROTOCOL ANALYSIS

### 6.5. SIMILARITY MATRIX

The similarity matrix is a diagrammatic representation of a pair-wise comparison of all protocols. Each column and each row corresponds to a protocol. The brightness of each cell in the matrix is proportional to the number of cell culture media shared by the two protocols. The brightest cell corresponds to protocols which have common media (i.e. identical protocols) in common, while a black cell corresponds to two protocols with no common media. The diagonal row of cells (from the top left to bottom right) corresponds to beads being compared to themselves. Beads are ordered along both the x- and y-axis according to the hierarchical clustering dendrogram illustrated in figure 6. The coloured arrays on the bottom and right of the matrix illustrate the protocol of each bead. The horizontal coloured legend below the matrix specifies the colour associated with each medium number.

The similarity matrix clearly displays clusters of similar protocols as square regions comprising brightly coloured cells. The size and overall brightness of the square regions are measures of the cluster size and intra-cluster protocol similarity, respectively. Additionally, the similarity matrix provides a global overview of the protocol similarity of beads or clusters to the remaining dataset. For example the brightness of the cells in the columns above cluster A indicate that the beads contained within cluster A have little similarity with the beads contained in cluster B and some similarity with the beads contained within cluster C.

**Figure 7:** Similarity matrix comprising a pair-wise comparison of all protocols

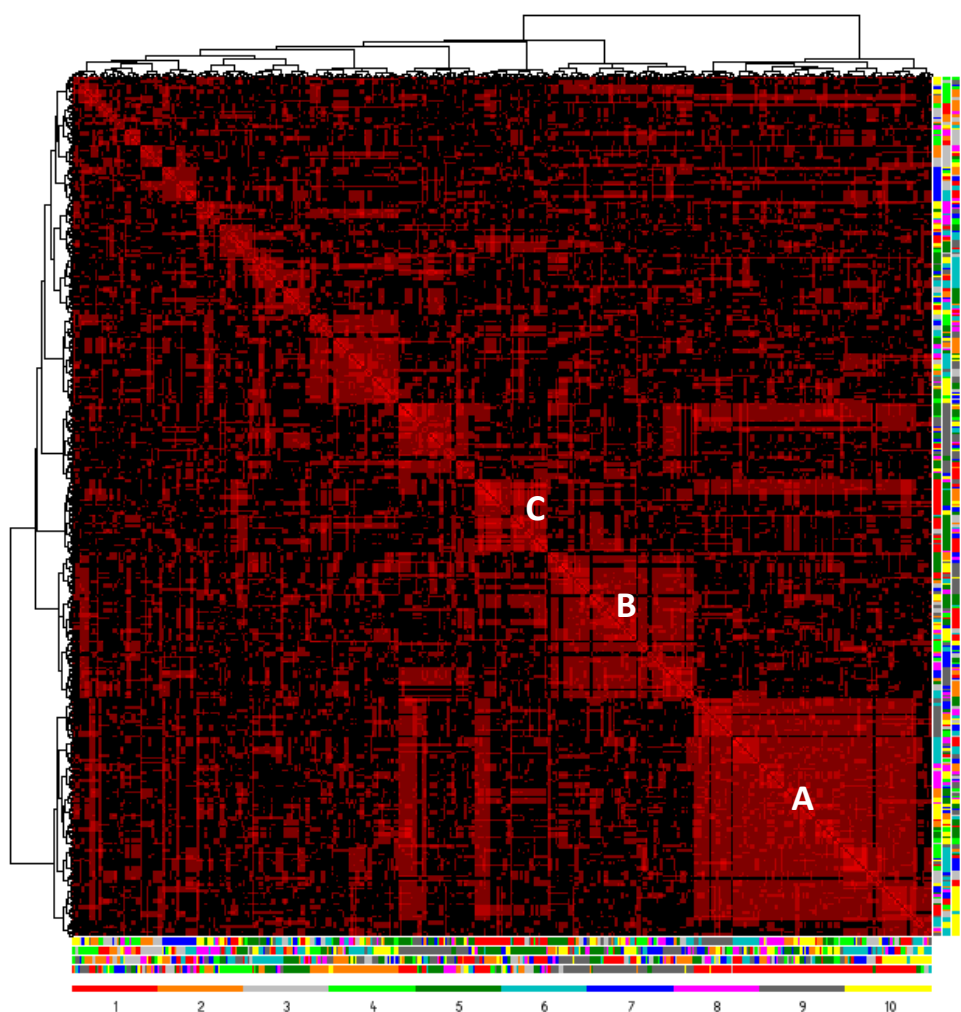

## 7. SUMMARY AND CONCLUSIONS

A CombiCult™ experiment was performed in which 40 serum-free cell culture media were screened in 10,000 combinations. The 40 media were tested over four split-pool cycles (performed on day 1, day 7, day 14 and day 21 respectively) with 10 media included in each cycle, such that 10,000 media combinations (protocols) are tested. A total of 480,000 beads were used so that on average each protocol was sampled by 48 beads. Following completion of the split-pool experiment (day 28) beads were screened using an immunocytochemistry assay and individual positive beads isolated.

Of the total number of monomeric beads screened, 622 (0.36 %) were sorted and verified as ‘hits’. The tags from each hit were read to infer the series of cell culture media (protocol) that produced differentiated cells. Of the 622 ‘hit’ beads, tags could be conclusively deconvoluted from 399 (64 %). Putative differentiation protocols were analysed using bespoke bioinformatics software Ariadne™ (v1.0) allowing protocols to be ranked and a subset to be selected for further validation and study. The 23 selected protocols are listed below in Table 11 as well as in the executive summary (Table 1). Validation numbers 1, 2, 4, 6 and 7 form part of group 7 in the fingerprint analysis and share cell culture medium 5 on split 3 and medium 1 on the final split. The first validated protocol is represented by a triplet of beads and has a one in ten probability of occurring randomly ( $p = 0.0971$ ) and is also a subset of group 4 in the fingerprint analysis (19 beads sharing medium 5 on split 1 and medium 9 on split 2). Validation numbers 10-12 form part of cluster C shown in the hierarchical clustering dendrogram and similarity matrix and share cell culture medium 1 (split 1) and 5 (split 2). Both protocols 10 and 11 are represented by doublet of beads. Finally, protocols 21-23 share medium 5 on split 1 and medium 10 on split 2 and form part of group 13 in the fingerprint analysis.

**Table 11:** Selected 23 validation protocols determined by Ariadne™ (v1.0). The protocols are identified by the series of cell culture media on each split-pool cycle (split 1 – split 4), e.g. 5-9-5-1.

| Validation Number | Protocol | Bead Ids      |                  | Basal Medium | Supplements                                                                                                     |
|-------------------|----------|---------------|------------------|--------------|-----------------------------------------------------------------------------------------------------------------|
| 1                 | 5-9-5-1  | 126, 135, 173 | Split 1 (Day 1)  | RHB-A        | -                                                                                                               |
|                   |          |               | Split 2 (Day 7)  | DMEM/F12     | 2mM Glutamine, 1X ITS suppl., 100ng/mL FGF8b, 500ng/mL mrShh.                                                   |
|                   |          |               | Split 3 (Day 15) | RHB-A        | -                                                                                                               |
|                   |          |               | Split 4 (Day 21) | DMEM/F12     | 2mM Glutamine, 1X N2 suppl., 200μM ascorbic acid, 1mg/mL laminin                                                |
| 2                 | 9-9-5-1  | 1             | Split 1 (Day 1)  | DMEM/F12     | 2mM Glutamine, 1% BSA, 1X N2suppl., 20μM SB431542.                                                              |
|                   |          |               | Split 2 (Day 7)  | DMEM/F12     | 2mM Glutamine, 1X ITS suppl., 100ng/mL FGF8b, 500ng/mL mrShh.                                                   |
|                   |          |               | Split 3 (Day 15) | RHB-A        | -                                                                                                               |
|                   |          |               | Split 4 (Day 21) | DMEM/F12     | 2mM Glutamine, 1X N2 suppl., 200μM ascorbic acid, 1mg/mL laminin                                                |
| 3                 | 5-9-10-1 | 71            | Split 1 (Day 1)  | RHB-A        | -                                                                                                               |
|                   |          |               | Split 2 (Day 7)  | DMEM/F12     | 2mM Glutamine, 1X ITS suppl., 100ng/mL FGF8b, 500ng/mL mrShh.                                                   |
|                   |          |               | Split 3 (Day 15) | DMEM/F12     | 2mM Glutamine, 1X N2 suppl., 20ng/mL bFGF, 20ng/mL EGF, 2ng/mL LIF.                                             |
|                   |          |               | Split 4 (Day 21) | DMEM/F12     | 2mM Glutamine, 1X N2 suppl., 200μM ascorbic acid, 1mg/mL laminin                                                |
| 4                 | 5-10-5-1 | 46, 180       | Split 1 (Day 1)  | RHB-A        | -                                                                                                               |
|                   |          |               | Split 2 (Day 7)  | DMEM/F12     | 2mM Glutamine, 1X ITS suppl., 200μM ascorbic acid, 20ng/mL bFGF, 10ng/mL BDNF 100ng/mL FGF8b, 1μM purmorphamine |
|                   |          |               | Split 3 (Day 15) | RHB-A        | -                                                                                                               |

| Validation Number | Protocol | Bead Ids    |                  | Basal Medium  | Supplements                                                                                                        |
|-------------------|----------|-------------|------------------|---------------|--------------------------------------------------------------------------------------------------------------------|
|                   |          |             | Split 4 (Day 21) | DMEM/F12      | 2mM Glutamine, 1X N2 suppl. , 200µM ascorbic acid, 1mg/mL laminin                                                  |
| 5                 | 5-9-9-1  | 26          | Split 1 (Day 1)  | RHB-A         | -                                                                                                                  |
|                   |          |             | Split 2 (Day 7)  | DMEM/F12      | 2mM Glutamine, 1X ITS suppl., 100ng/mL FGF8b, 500ng/mL mrShh.                                                      |
|                   |          |             | Split 3 (Day 15) | Advanced DMEM | 2mM Glutamine                                                                                                      |
|                   |          |             | Split 4 (Day 21) | DMEM/F12      | 2mM Glutamine, 1X N2 suppl. , 200µM ascorbic acid, 1mg/mL laminin                                                  |
| 6                 | 5-4-5-1  | 40          | Split 1 (Day 1)  | RHB-A         | -                                                                                                                  |
|                   |          |             | Split 2 (Day 7)  | DMEM/F12      | 2mM Glutamine, 1X ITS suppl., 0.5µM retinoic acid.                                                                 |
|                   |          |             | Split 3 (Day 15) | RHB-A         | -                                                                                                                  |
|                   |          |             | Split 4 (Day 21) | DMEM/F12      | 2mM Glutamine, 1X N2 suppl. , 200µM ascorbic acid, 1mg/mL laminin.                                                 |
| 7                 | 4-9-5-1  | 183         | Split 1 (Day 1)  | DMEM/F12      | 2mM Glutamine 1% BSA, 1X N2 suppl., 1X B27 neuromix.                                                               |
|                   |          |             | Split 2 (Day 7)  | DMEM/F12      | 2mM Glutamine, 1X ITS suppl., 100ng/mL FGF8b, 500ng/mL mrShh.                                                      |
|                   |          |             | Split 3 (Day 15) | RHB-A         | -                                                                                                                  |
|                   |          |             | Split 4 (Day 21) | DMEM/F12      | 2mM Glutamine, 1X N2 suppl. , 200µM ascorbic acid, 1mg/mL laminin                                                  |
| 8                 | 6-8-1-1  | 8, 128, 134 | Split 1 (Day 1)  | KO DMEM       | 10% KSR, 2mM Glutamine                                                                                             |
|                   |          |             | Split 2 (Day 7)  | Advanced DMEM | 2mM Glutamine                                                                                                      |
|                   |          |             | Split 3 (Day 15) | DMEM/F12      | 2mM Glutamine, 1X ITS suppl., 20ng/mL bFGF.                                                                        |
|                   |          |             | Split 4 (Day 21) | DMEM/F12      | 2mM Glutamine, 1X N2 suppl. , 200µM ascorbic acid, 1mg/mL laminin                                                  |
| 9                 | 6-9-1-1  | 163         | Split 1 (Day 1)  | KO DMEM       | 10% KSR, 2mM Glutamine                                                                                             |
|                   |          |             | Split 2 (Day 7)  | DMEM/F12      | 2mM Glutamine, 1X ITS suppl., 100ng/mL FGF8b, 500ng/mL mrShh.                                                      |
|                   |          |             | Split 3 (Day 15) | DMEM/F12      | 2mM Glutamine, 1X ITS suppl., 20ng/mL bFGF.                                                                        |
|                   |          |             | Split 4 (Day 21) | DMEM/F12      | 2mM Glutamine, 1X N2 suppl. , 200µM ascorbic acid, 1mg/mL laminin                                                  |
| 10                | 1-5-2-1  | 166, 171    | Split 1 (Day 1)  | KO DMEM       | 15% FBS, 2mM Glutamine, 0.1mM β-mercaptoethanol, 1X NEAA, 1000 Units/mL LIF (standard growth media for mES cells). |
|                   |          |             | Split 2 (Day 7)  | RHB-A         | -                                                                                                                  |
|                   |          |             | Split 3 (Day 15) | DMEM/F12      | 2mM Glutamine, 1X ITS suppl., 20ng/mL bFGF, 1mg/mL laminin                                                         |
|                   |          |             | Split 4 (Day 21) | DMEM/F12      | 2mM Glutamine, 1X N2 suppl. , 200µM ascorbic acid, 1mg/mL laminin                                                  |
| 11                | 1-5-2-4  | 284, 299    | Split 1 (Day 1)  | KO DMEM       | 15% FBS, 1mM Glutamine, 0.1mM β-mercaptoethanol, 1X NEAA, 1000 Units/mL LIF (standard growth media for mES cells)  |
|                   |          |             | Split 2 (Day 7)  | RHB-A         | -                                                                                                                  |
|                   |          |             | Split 3 (Day 15) | DMEM/F12      | 2mM Glutamine, 1X ITS suppl., 20ng/mL bFGF, 1mg/mL laminin                                                         |
|                   |          |             | Split 4 (Day 21) | DMEM/F12      | 2mM Glutamine, 1X ITS suppl., 1µM cAMP, 10ng/mL hrBDNF                                                             |

| Validation Number | Protocol  | Bead Ids |                  | Basal Medium  | Supplements                                                                                                                 |
|-------------------|-----------|----------|------------------|---------------|-----------------------------------------------------------------------------------------------------------------------------|
| 12                | 1-5-2-9   | 443      | Split 1 (Day 1)  | KO DMEM       | 15% FBS, 1mM Glutamine, 0.1mM $\beta$ -mercaptoethanol, 1X NEAA, (standard growth media for mES cells), 1000 Units/mL LIF   |
|                   |           |          | Split 2 (Day 7)  | RHB-A         | -                                                                                                                           |
|                   |           |          | Split 3 (Day 15) | DMEM/F12      | 2mM Glutamine, 1X ITS suppl., 20ng/mL bFGF, 1mg/mL laminin                                                                  |
|                   |           |          | Split 4 (Day 21) | Advanced DMEM | 2mM Glutamine                                                                                                               |
| 13                | 4-6-7-1   | 77, 139  | Split 1 (Day 1)  | DMEM/F12      | 1% BSA, 1X N2 suppl., 1X B27 neuromix,. 1mM Glutamine                                                                       |
|                   |           |          | Split 2 (Day 7)  | KO DMEM       | 10% KSR, 2mM Glutamine                                                                                                      |
|                   |           |          | Split 3 (Day 15) | DMEM/F12      | 2mM Glutamine, 1X ITS suppl., 1X B27 suppl., 50ng/mL mr Dkk1                                                                |
|                   |           |          | Split 4 (Day 21) | DMEM/F12      | 2mM Glutamine, 1X N2 suppl. , 200 $\mu$ M ascorbic acid., 1mg/mL laminin                                                    |
| 14                | 7-9-2-9   | 438, 517 | Split 1 (Day 1)  | DMEM/F12      | 2mM Glutamine, 1% BSA, 1X ITS suppl., 20ng/mL bFGF                                                                          |
|                   |           |          | Split 2 (Day 7)  | DMEM/F12      | 2mM Glutamine, 1X ITS suppl., 100ng/mL FGF8b, 500ng/mL mrShh.                                                               |
|                   |           |          | Split 3 (Day 15) | DMEM/F12      | 2mM Glutamine, 1X ITS suppl., 20ng/mL bFGF, 1mg/mL laminin                                                                  |
|                   |           |          | Split 4 (Day 21) | Advanced DMEM | 2mM Glutamine                                                                                                               |
| 15                | 5-9-2-9   | 488      | Split 1 (Day 1)  | RHB-A         | -                                                                                                                           |
|                   |           |          | Split 2 (Day 7)  | DMEM/F12      | 2mM Glutamine, 1X ITS suppl., 100ng/mL FGF8b, 500ng/mL mrShh.                                                               |
|                   |           |          | Split 3 (Day 15) | DMEM/F12      | 2mM Glutamine, 1X N2 suppl., 20ng/mL bFGF, 1mg/mL laminin                                                                   |
| 16                | 5-9-2-1   | 121      | Split 4 (Day 21) | Advanced DMEM | 2mM Glutamine                                                                                                               |
|                   |           |          | Split 1 (Day 1)  | RHB-A         | -                                                                                                                           |
|                   |           |          | Split 2 (Day 7)  | DMEM/F12      | 2mM Glutamine, 1X ITS suppl., 100ng/mL FGF8b, 500ng/mL mrShh.                                                               |
|                   |           |          | Split 3 (Day 15) | DMEM/F12      | 2mM Glutamine, 1X N2 suppl., 20ng/mL bFGF, 1mg/mL laminin                                                                   |
|                   |           |          | Split 4 (Day 21) | DMEM/F12      | 2mM Glutamine, 1X N2 suppl. , 200 $\mu$ M ascorbic acid, 1mg/mL laminin                                                     |
| 17                | 3-1-10-1  | 48, 159  | Split 1 (Day 1)  | Advanced DMEM | 1mM Glutamine                                                                                                               |
|                   |           |          | Split 2 (Day 7)  | DMEM/F12      | 2mM Glutamine, 1X ITS suppl., 5mg/mL fibronectin.                                                                           |
|                   |           |          | Split 3 (Day 15) | DMEM/F12      | 2mM Glutamine, 1X N2 suppl., 20ng/mL bFGF, 20ng/mL EGF, 2ng/mL LIF.                                                         |
|                   |           |          | Split 4 (Day 21) | DMEM/F12      | 2mM Glutamine, 1X N2 suppl. , 200 $\mu$ M ascorbic acid, 1mg/mL laminin                                                     |
| 18                | 9-10-10-1 | 172      | Split 1 (Day 1)  | DMEM/F12      | 2mM Glutamine,1% BSA, 1X N2suppl., 20 $\mu$ M SB431542.                                                                     |
|                   |           |          | Split 2 (Day 7)  | DMEM/F12      | 2mM Glutamine, 1X ITS suppl., 200 $\mu$ M ascorbic acid, 20ng/mL bFGF, 10ng/mL BDNF 100ng/mL FGF8b, 1 $\mu$ M purmorphamine |
|                   |           |          | Split 3 (Day 15) | DMEM/F12      | 2mM Glutamine, 1X N2 suppl., 20ng/mL bFGF, 20ng/mL EGF, 2ng/mL LIF.                                                         |
|                   |           |          | Split 4 (Day 21) | DMEM/F12      | 2mM Glutamine, 1X N2 suppl. , 200 $\mu$ M ascorbic acid, 1mg/mL laminin                                                     |
| 19                | 9-2-10-1  | 113      | Split 1 (Day 1)  | DMEM/F12      | 2mM Glutamine,1% BSA, 1X N2suppl., 20 $\mu$ M SB431542.                                                                     |
|                   |           |          | Split 2 (Day 7)  | DMEM/F12      | 2mM Glutamine, 1X ITS suppl., 100ng/mL mr Noggin.                                                                           |
|                   |           |          | Split 3 (Day 15) | DMEM/F12      | 2mM Glutamine, 1X N2 suppl., 20ng/mL bFGF, 20ng/mL EGF, 2ng/mL LIF.                                                         |
|                   |           |          | Split 4 (Day 21) | DMEM/F12      | 2mM Glutamine, 1X N2 suppl. , 200 $\mu$ M ascorbic acid, 1mg/mL laminin                                                     |

| Validation Number | Protocol | Bead Ids |                  | Basal Medium  | Supplements                                                                                                     |
|-------------------|----------|----------|------------------|---------------|-----------------------------------------------------------------------------------------------------------------|
| 20                | 9-4-6-1  | 81, 108  | Split 1 (Day 1)  | DMEM/F12      | 2mM Glutamine, 1% BSA, 1X N2 suppl., 20µM SB431542.                                                             |
|                   |          |          | Split 2 (Day 7)  | DMEM/F12      | 2mM Glutamine, 1X ITS suppl., 0.5µM retinoic acid.                                                              |
|                   |          |          | Split 3 (Day 15) | KO DMEM       | 10% KSR, 2mM Glutamine                                                                                          |
|                   |          |          | Split 4 (Day 21) | DMEM/F12      | 2mM Glutamine, 1X N2 suppl., 200µM ascorbic acid, 1mg/mL laminin                                                |
| 21                | 5-10-2-2 | 186      | Split 1 (Day 1)  | RHB-A         | -                                                                                                               |
|                   |          |          | Split 2 (Day 7)  | DMEM/F12      | 2mM Glutamine, 1X ITS suppl., 200µM ascorbic acid, 20ng/mL bFGF, 10ng/mL BDNF 100ng/mL FGF8b, 1µM purmorphamine |
|                   |          |          | Split 3 (Day 15) | DMEM/F12      | 2mM Glutamine, 1X ITS suppl., 20ng/mL bFGF, 1mg/mL laminin                                                      |
|                   |          |          | Split 4 (Day 21) | DMEM/F12      | 2mM Glutamine, 0.5% FBS, 1X N2 suppl., 20ng/mL hr GDNF, 20ng/mL hr BDNF                                         |
| 22                | 5-10-9-9 | 476, 508 | Split 1 (Day 1)  | RHB-A         | -                                                                                                               |
|                   |          |          | Split 2 (Day 7)  | DMEM/F12      | 2mM Glutamine, 1X ITS suppl., 200µM ascorbic acid, 20ng/mL bFGF, 10ng/mL BDNF 100ng/mL FGF8b, 1µM purmorphamine |
|                   |          |          | Split 3 (Day 15) | Advanced DMEM | 2mM Glutamine                                                                                                   |
|                   |          |          | Split 4 (Day 21) | Advanced DMEM | 2mM Glutamine                                                                                                   |
| 23                | 5-10-6-1 | 141      | Split 1 (Day 1)  | RHB-A         | -                                                                                                               |
|                   |          |          | Split 2 (Day 7)  | DMEM/F12      | 2mM Glutamine, 1X ITS suppl., 200µM ascorbic acid, 20ng/mL bFGF, 10ng/mL BDNF 100ng/mL FGF8b, 1µM purmorphamine |
|                   |          |          | Split 3 (Day 15) | KO DMEM       | 10% KSR, 2mM Glutamine                                                                                          |
|                   |          |          | Split 4 (Day 21) | DMEM/F12      | 2mM Glutamine, 1X N2 suppl., 200µM ascorbic acid, 1mg/mL laminin                                                |



## ANNEX 1: FLOW SORTINGBIN 1 – File 1 of 3

Bin 1: COPAS scatter plots showing events for medium 1 of the final split-pool cycle (bin 1). In the first scatter plot (time of flight [TOF] vs. optical extinction [ext]), events depicted by a red dot fall within the gate defining monomeric beads and were sorted. The second scatter plot displays the fluorescent values of the sorted beads (TOF vs. red fluorescence intensity). Beads with a red fluorescent intensity above the threshold value are depicted as green dots and were individually dispensed into 96 well plates.

Number of beads individually dispensed: 30

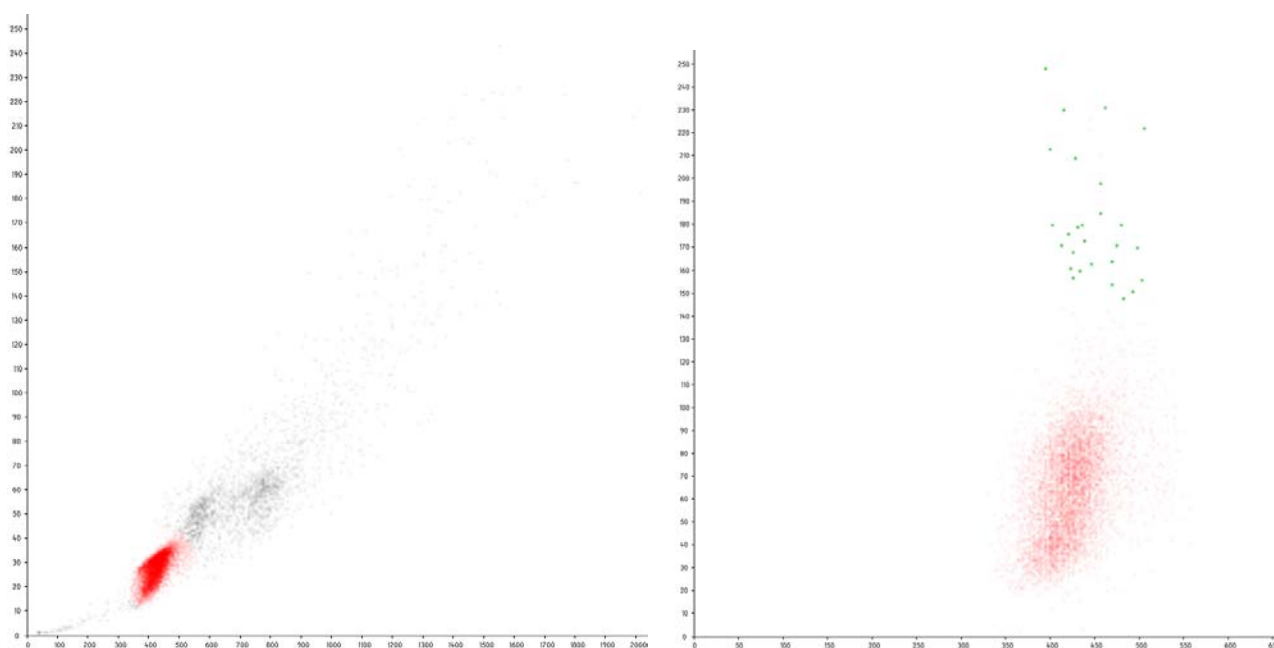

## ANNEX 1: FLOW SORTINGBIN 1 – File 2 of 3

Bin 1: COPAS scatter plots showing events for medium 1 of the final split-pool cycle (bin 1). In the first scatter plot (time of flight [TOF] vs. optical extinction [ext]), events depicted by a red dot fall within the gate defining monomeric beads and were sorted. The second scatter plot displays the fluorescent values of the sorted beads (TOF vs. red fluorescence intensity). Beads with a red fluorescent intensity above the threshold value are depicted as green dots and were individually dispensed into 96 well plates.

Number of beads individually dispensed: 96

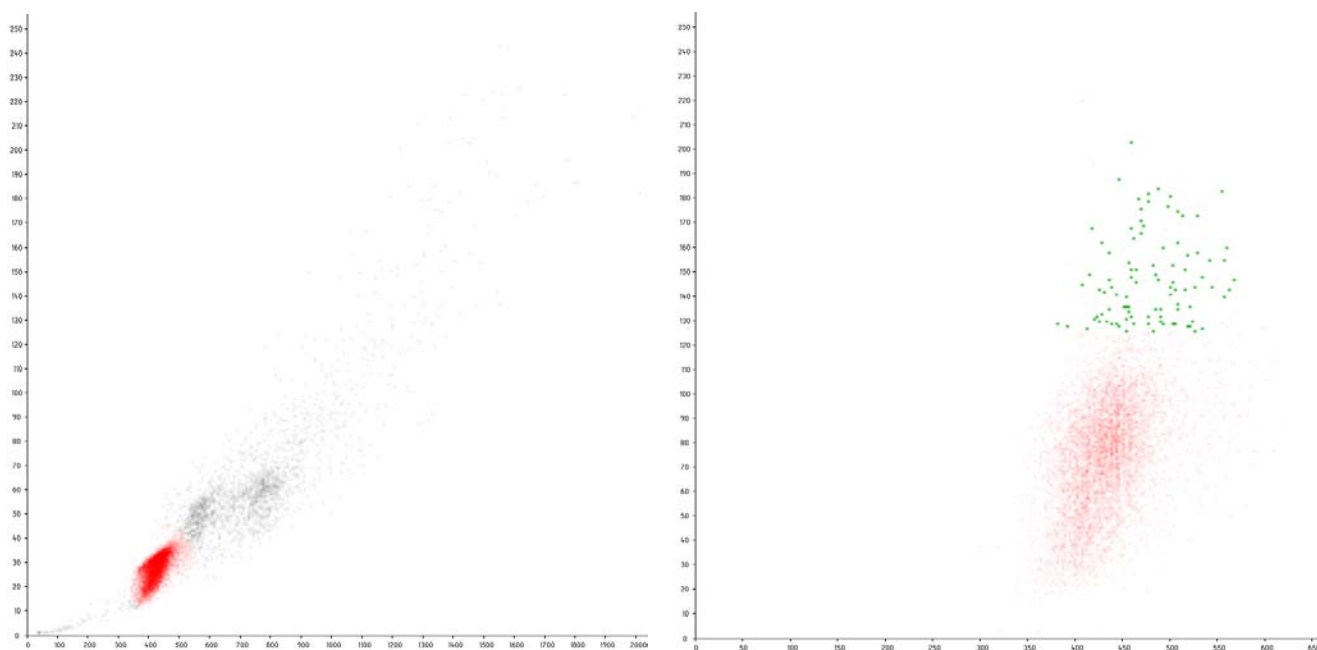

## ANNEX 1: FLOW SORTINGBIN 1 – File 3 of 3

Bin 1: COPAS scatter plots showing events for medium 1 of the final split-pool cycle (bin 1). In the first scatter plot (time of flight [TOF] vs. optical extinction [ext]), events depicted by a red dot fall within the gate defining monomeric beads and were sorted. The second scatter plot displays the fluorescent values of the sorted beads (TOF vs. red fluorescence intensity). Beads with a red fluorescent intensity above the threshold value are depicted as green dots and were individually dispensed into 96 well plates.

Number of beads individually dispensed: 96

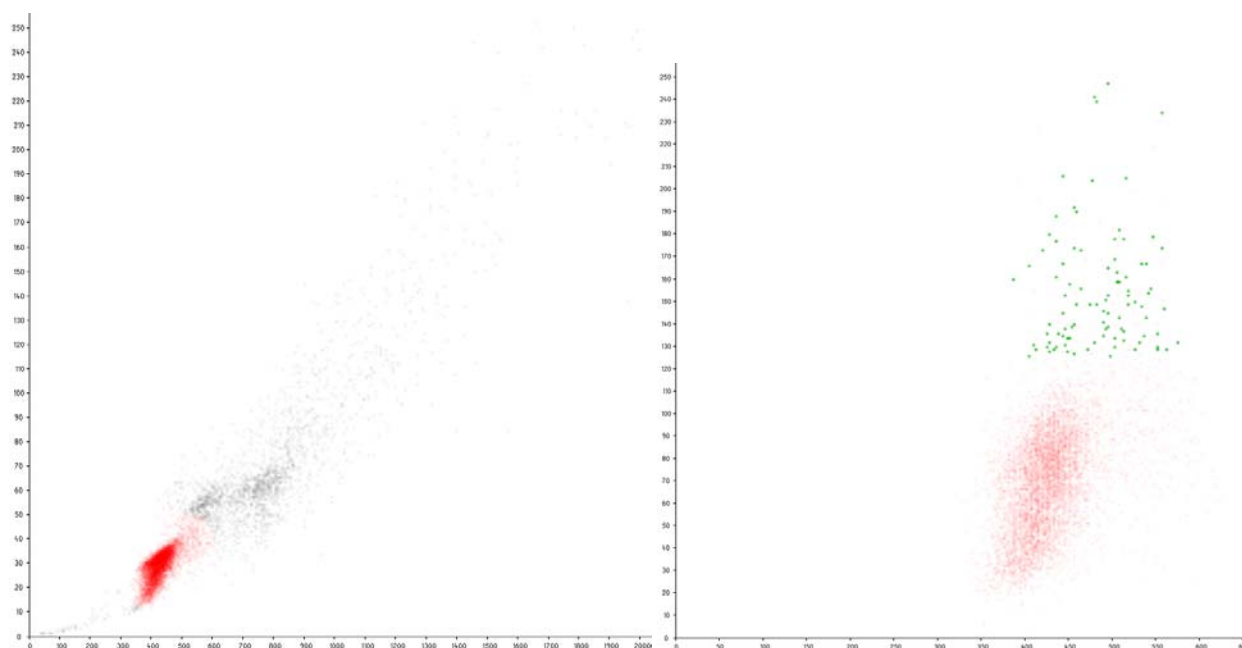

## ANNEX 1: FLOW SORTINGBIN 2 – File 1 of 1

Bin 2: COPAS scatter plots showing events for medium 2 of the final split-pool cycle (bin 2). In the first scatter plot (time of flight [TOF] vs. optical extinction [ext]), events depicted by a red dot fall within the gate defining monomeric beads and were sorted. The second scatter plot displays the fluorescent values of the sorted beads (TOF vs. red fluorescence intensity). Beads with a red fluorescent intensity above the threshold value are depicted as green dots and were individually dispensed into 96 well plates.

Number of beads individually dispensed: 80

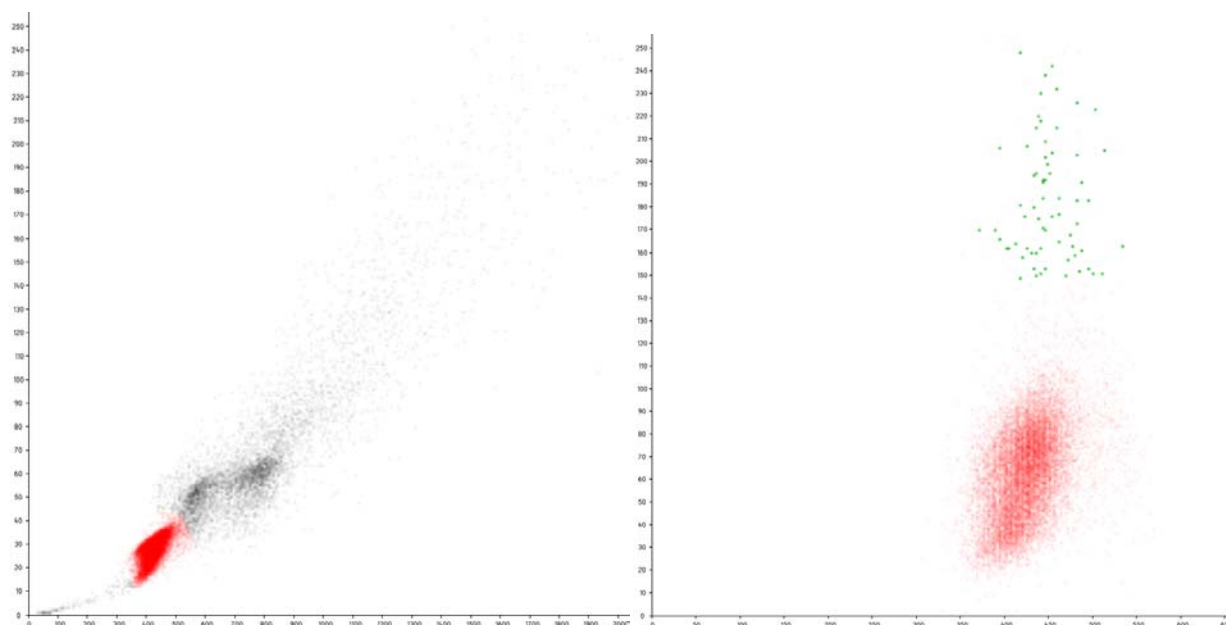

## ANNEX 1: FLOW SORTINGBIN 3 – File 1 of 1

Bin 3: COPAS scatter plots showing events for medium 3 of the final split-pool cycle (bin 3). In the first scatter plot (time of flight [TOF] vs. optical extinction [ext]), events depicted by a red dot fall within the gate defining monomeric beads and were sorted. The second scatter plot displays the fluorescent values of the sorted beads (TOF vs. red fluorescence intensity). Beads with a red fluorescent intensity above the threshold value are depicted as green dots and were individually dispensed into 96 well plates.

Number of beads individually dispensed: 23

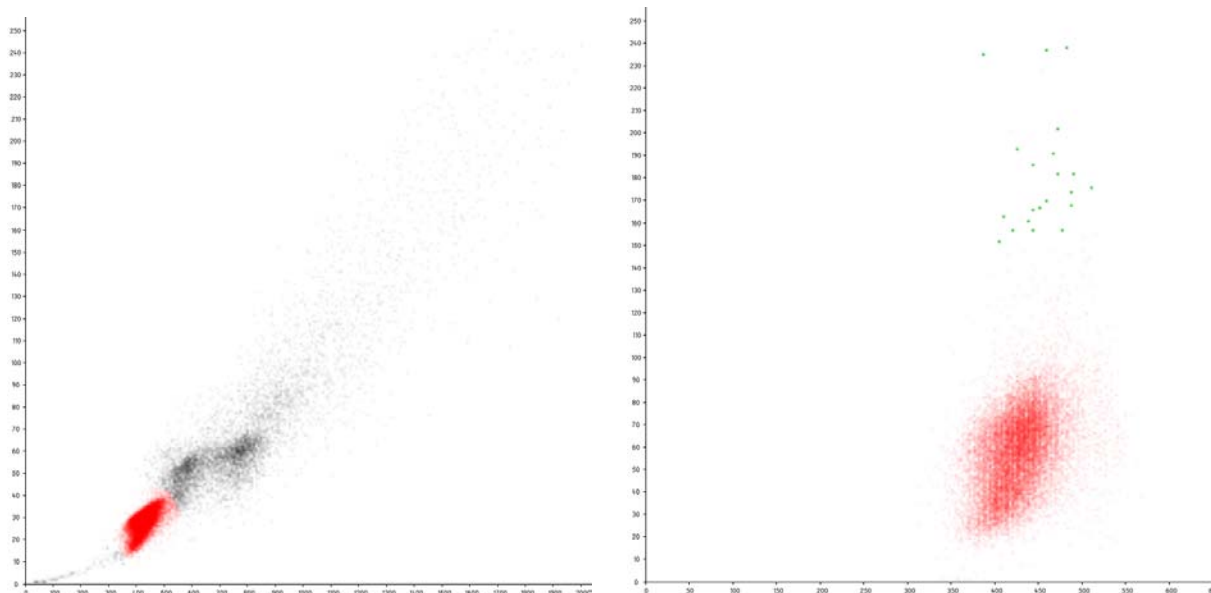

## ANNEX 1: FLOW SORTINGBIN 4 – File 1 of 1

Bin 4: COPAS scatter plots showing events for medium 4 of the final split-pool cycle (bin 4). In the first scatter plot (time of flight [TOF] vs. optical extinction [ext]), events depicted by a red dot fall within the gate defining monomeric beads and were sorted. The second scatter plot displays the fluorescent values of the sorted beads (TOF vs. red fluorescence intensity). Beads with a red fluorescent intensity above the threshold value are depicted as green dots and were individually dispensed into 96 well plates.

Number of beads individually dispensed: 45

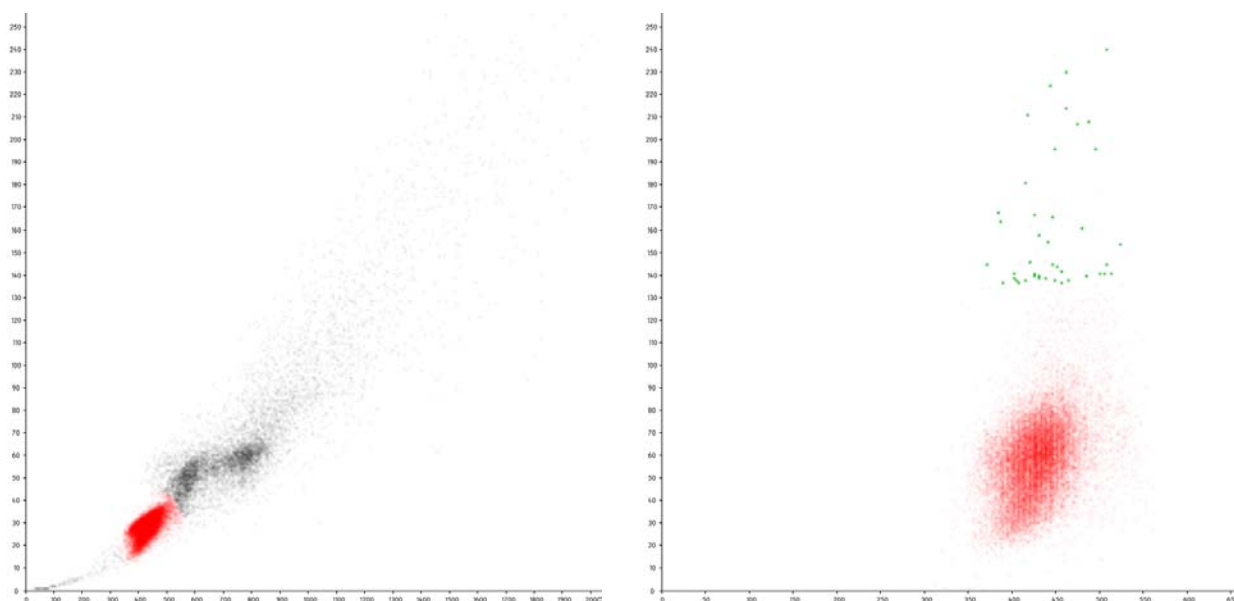

## ANNEX 1: FLOW SORTINGBIN 5 – File 1 of 1

Bin 5: COPAS scatter plots showing events for medium 5 of the final split-pool cycle (bin 5). In the first scatter plot (time of flight [TOF] vs. optical extinction [ext]), events depicted by a red dot fall within the gate defining monomeric beads and were sorted. The second scatter plot displays the fluorescent values of the sorted beads (TOF vs. red fluorescence intensity). Beads with a red fluorescent intensity above the threshold value are depicted as green dots and were individually dispensed into 96 well plates.

Number of beads individually dispensed: 77

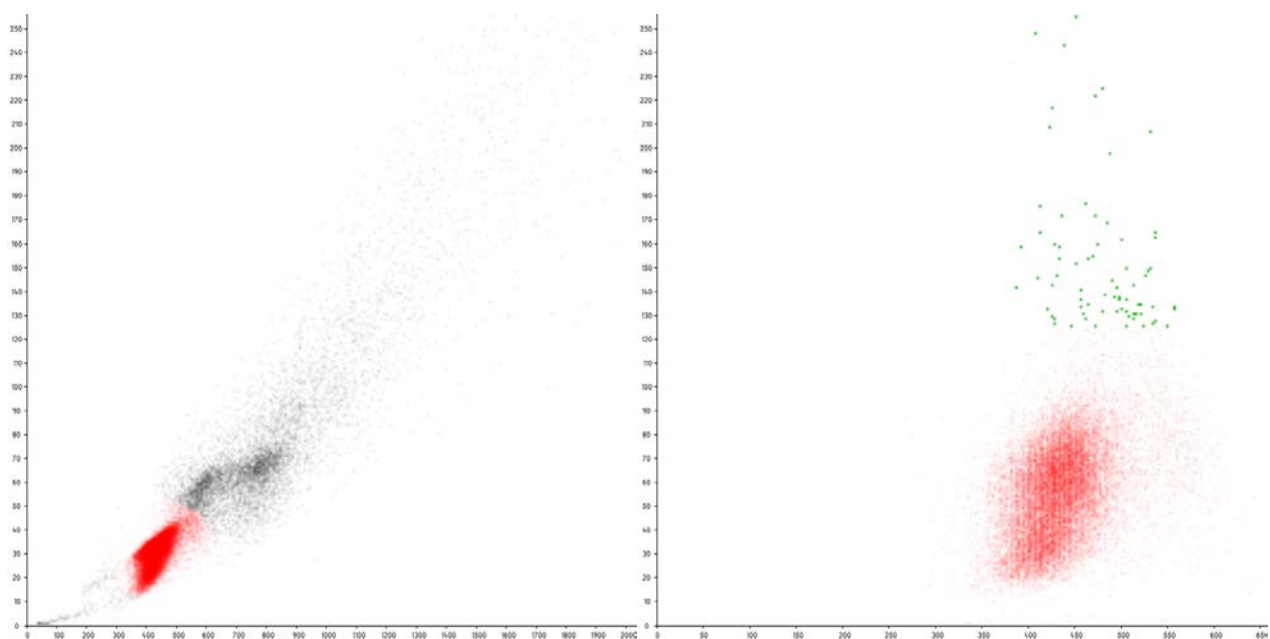

## ANNEX 1: FLOW SORTINGBIN 6 – File 1 of 1

Bin 6: COPAS scatter plots showing events for medium 6 of the final split-pool cycle (bin 6). In the first scatter plot (time of flight [TOF] vs. optical extinction [ext]), events depicted by a red dot fall within the gate defining monomeric beads and were sorted. The second scatter plot displays the fluorescent values of the sorted beads (TOF vs. red fluorescence intensity). Beads with a red fluorescent intensity above the threshold value are depicted as green dots and were individually dispensed into 96 well plates.

Number of beads individually dispensed: 8

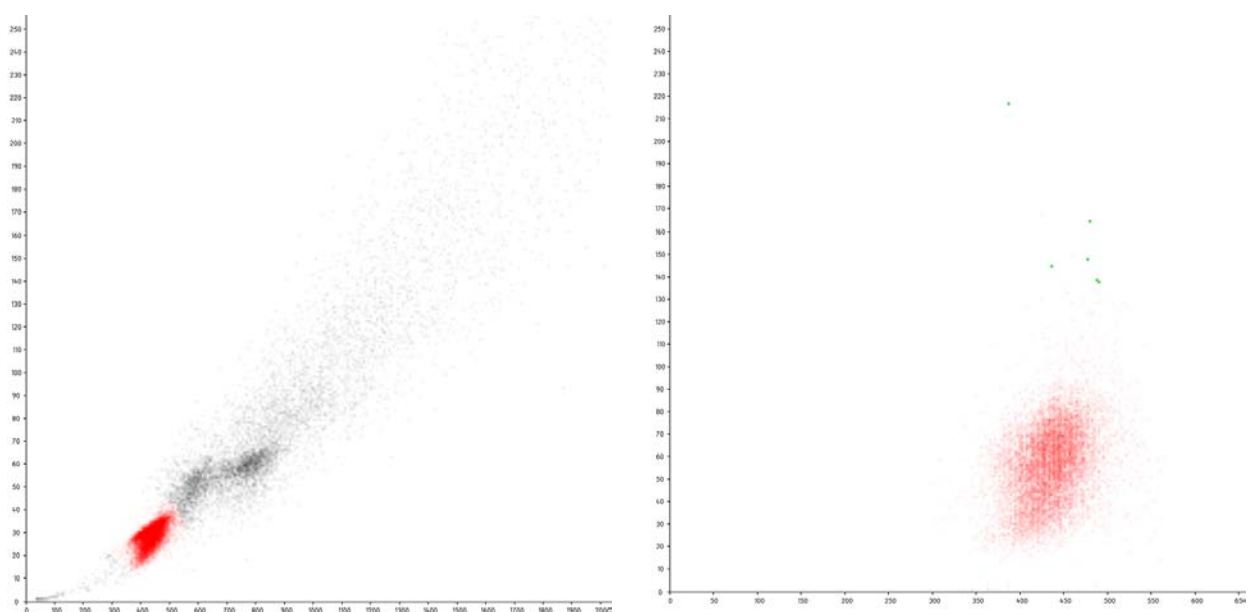



## ANNEX 1: FLOW SORTINGBIN 7 – File 1 of 1

Bin 7: COPAS scatter plots showing events for medium 7 of the final split-pool cycle (bin 7). In the first scatter plot (time of flight [TOF] vs. optical extinction [ext]), events depicted by a red dot fall within the gate defining monomeric beads and were sorted. The second scatter plot displays the fluorescent values of the sorted beads (TOF vs. red fluorescence intensity). Beads with a red fluorescent intensity above the threshold value are depicted as green dots and were individually dispensed into 96 well plates.

Number of beads individually dispensed: 20

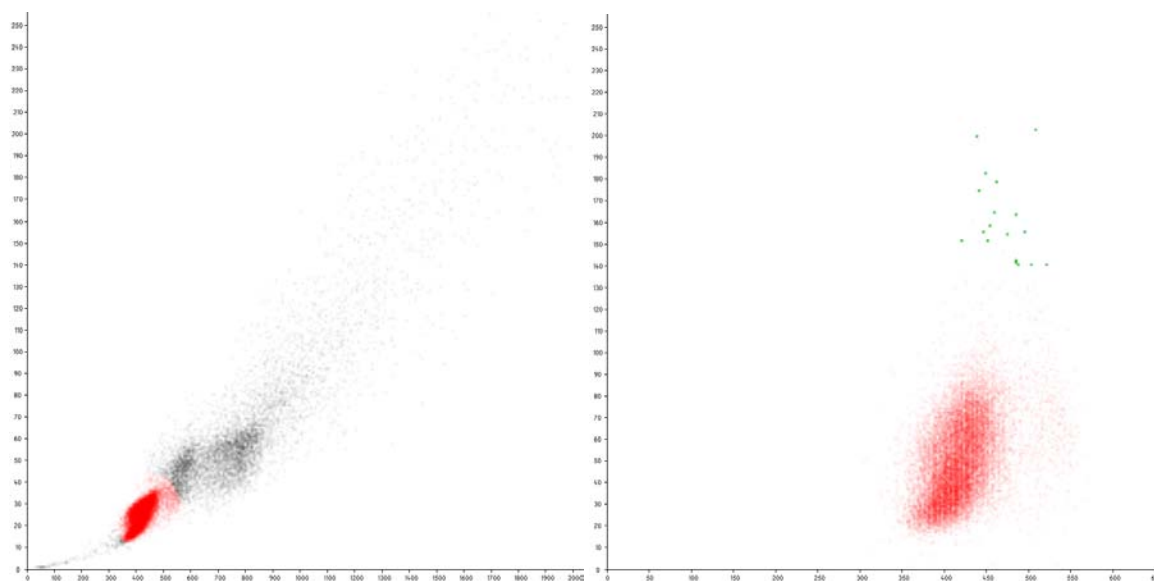

## ANNEX 1: FLOW SORTINGBIN 8 – File 1 of 1

Bin 8: COPAS scatter plots showing events for medium 8 of the final split-pool cycle (bin 8). In the first scatter plot (time of flight [TOF] vs. optical extinction [ext]), events depicted by a red dot fall within the gate defining monomeric beads and were sorted. The second scatter plot displays the fluorescent values of the sorted beads (TOF vs. red fluorescence intensity). Beads with a red fluorescent intensity above the threshold value are depicted as green dots and were individually dispensed into 96 well plates.

Number of beads individually dispensed: 21

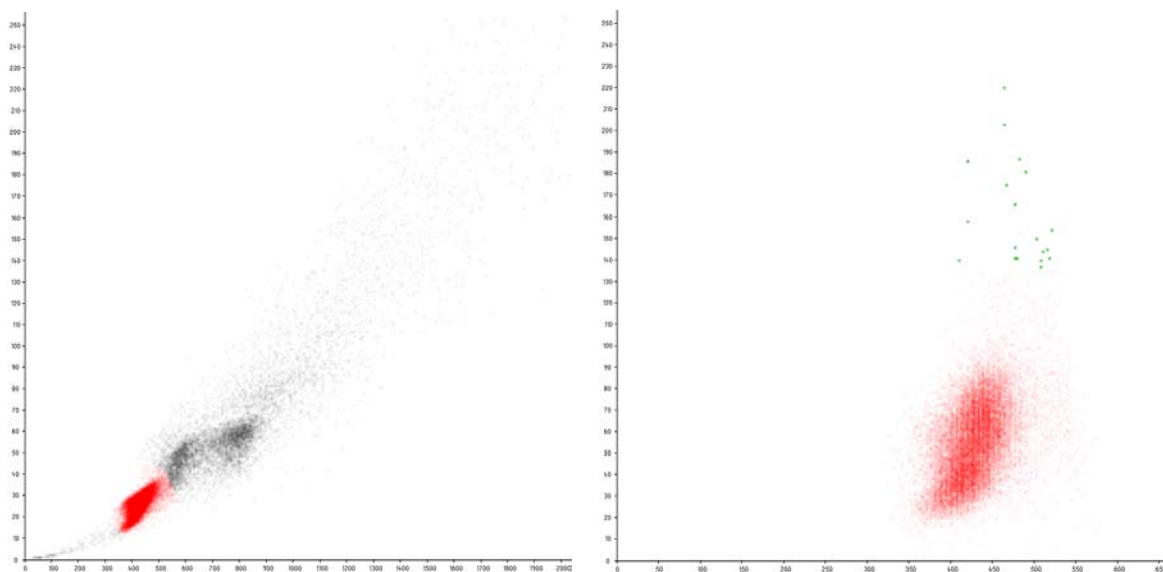

## ANNEX 1: FLOW SORTINGBIN 9 – File 1 of 2

Bin 9: COPAS scatter plots showing events for medium 9 of the final split-pool cycle (bin 9). In the first scatter plot (time of flight [TOF] vs. optical extinction [ext]), events depicted by a red dot fall within the gate defining monomeric beads and were sorted. The second scatter plot displays the fluorescent values of the sorted beads (TOF vs. red fluorescence intensity). Beads with a red fluorescent intensity above the threshold value are depicted as green dots and were individually dispensed into 96 well plates.

Number of beads individually dispensed: 10

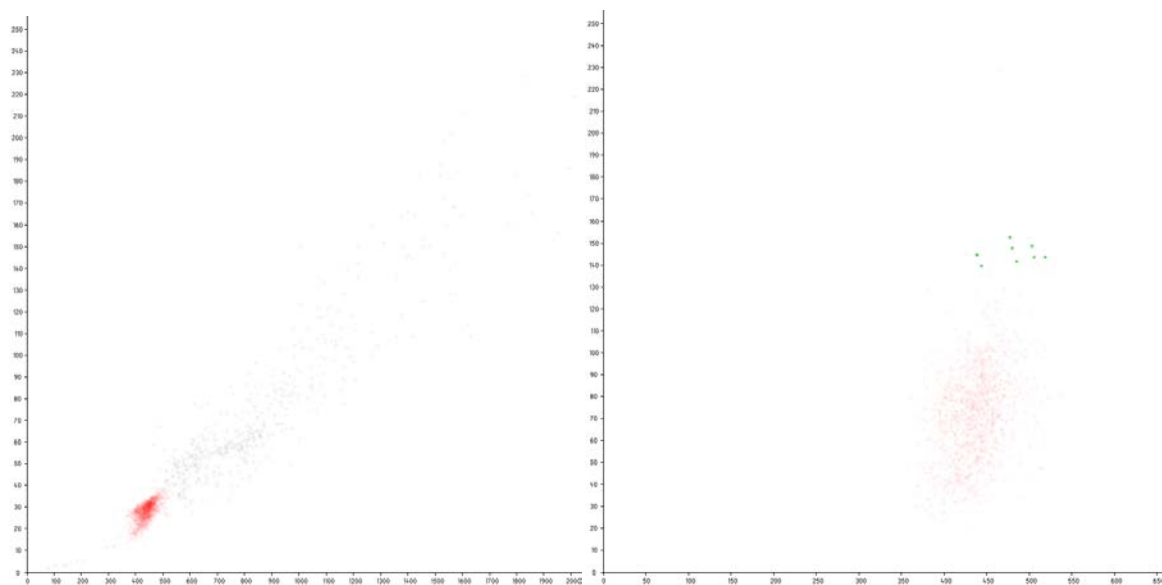

## ANNEX 1: FLOW SORTINGBIN 9 – File 2 of 2

Bin 9: COPAS scatter plots showing events for medium 9 of the final split-pool cycle (bin 9). In the first scatter plot (time of flight [TOF] vs. optical extinction [ext]), events depicted by a red dot fall within the gate defining monomeric beads and were sorted. The second scatter plot displays the fluorescent values of the sorted beads (TOF vs. red fluorescence intensity). Beads with a red fluorescent intensity above the threshold value are depicted as green dots and were individually dispensed into 96 well plates.

Number of beads individually dispensed: 96

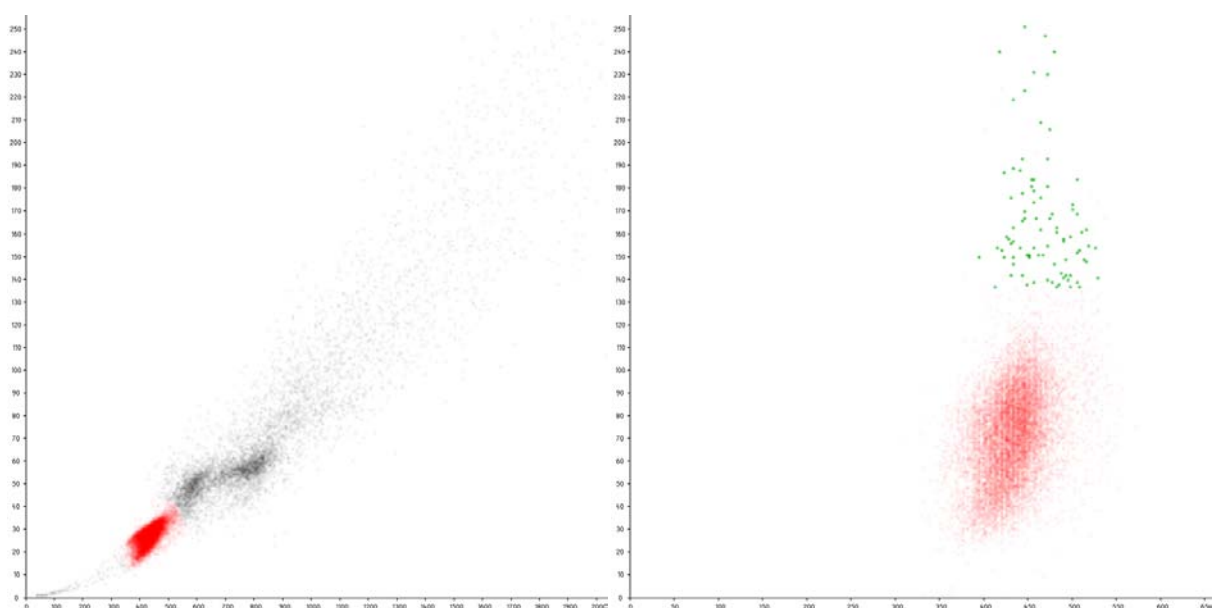

## ANNEX 1: FLOW SORTINGBIN 10 – File 1 of 1

Bin 10: COPAS scatter plots showing events for medium 10 of the final split-pool cycle (bin 10). In the first scatter plot (time of flight [TOF] vs. optical extinction [ext]), events depicted by a red dot fall within the gate defining monomeric beads and were sorted. The second scatter plot displays the fluorescent values of the sorted beads (TOF vs. red fluorescence intensity). Beads with a red fluorescent intensity above the threshold value are depicted as green dots and were individually dispensed into 96 well plates.

Number of beads individually dispensed: 17

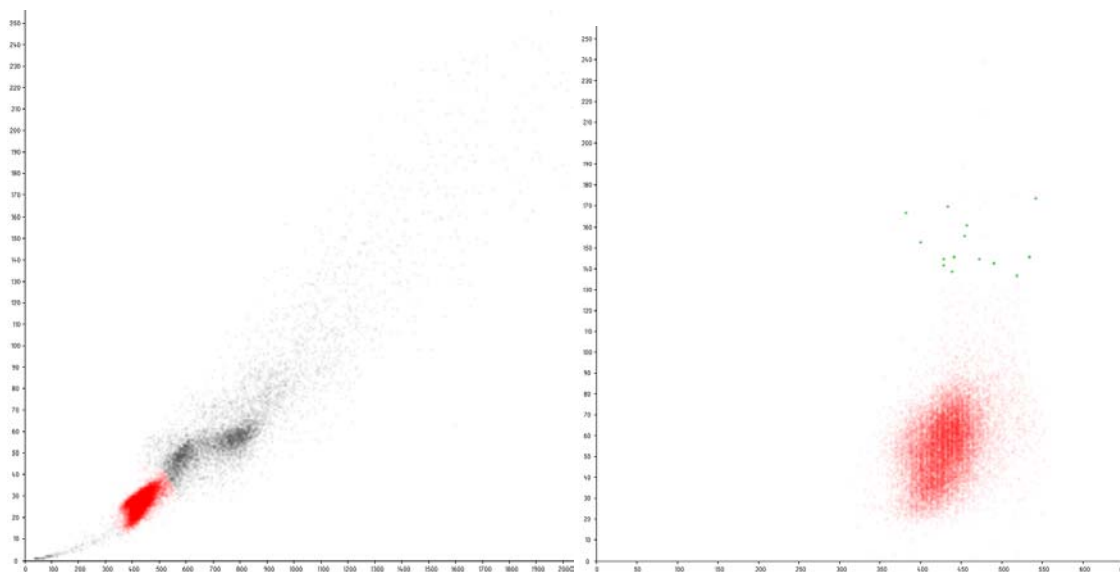

ANNEX 2: TAG REFERENCE SET - TAG DECONVOLUTION SESSION 1

Tag analysis flow cytometry instrument: BD FACSCalibur

Number of gates: 30

Number of beads whose tags were deconvoluted: 23

Number of beads with conclusive tagging data: 16

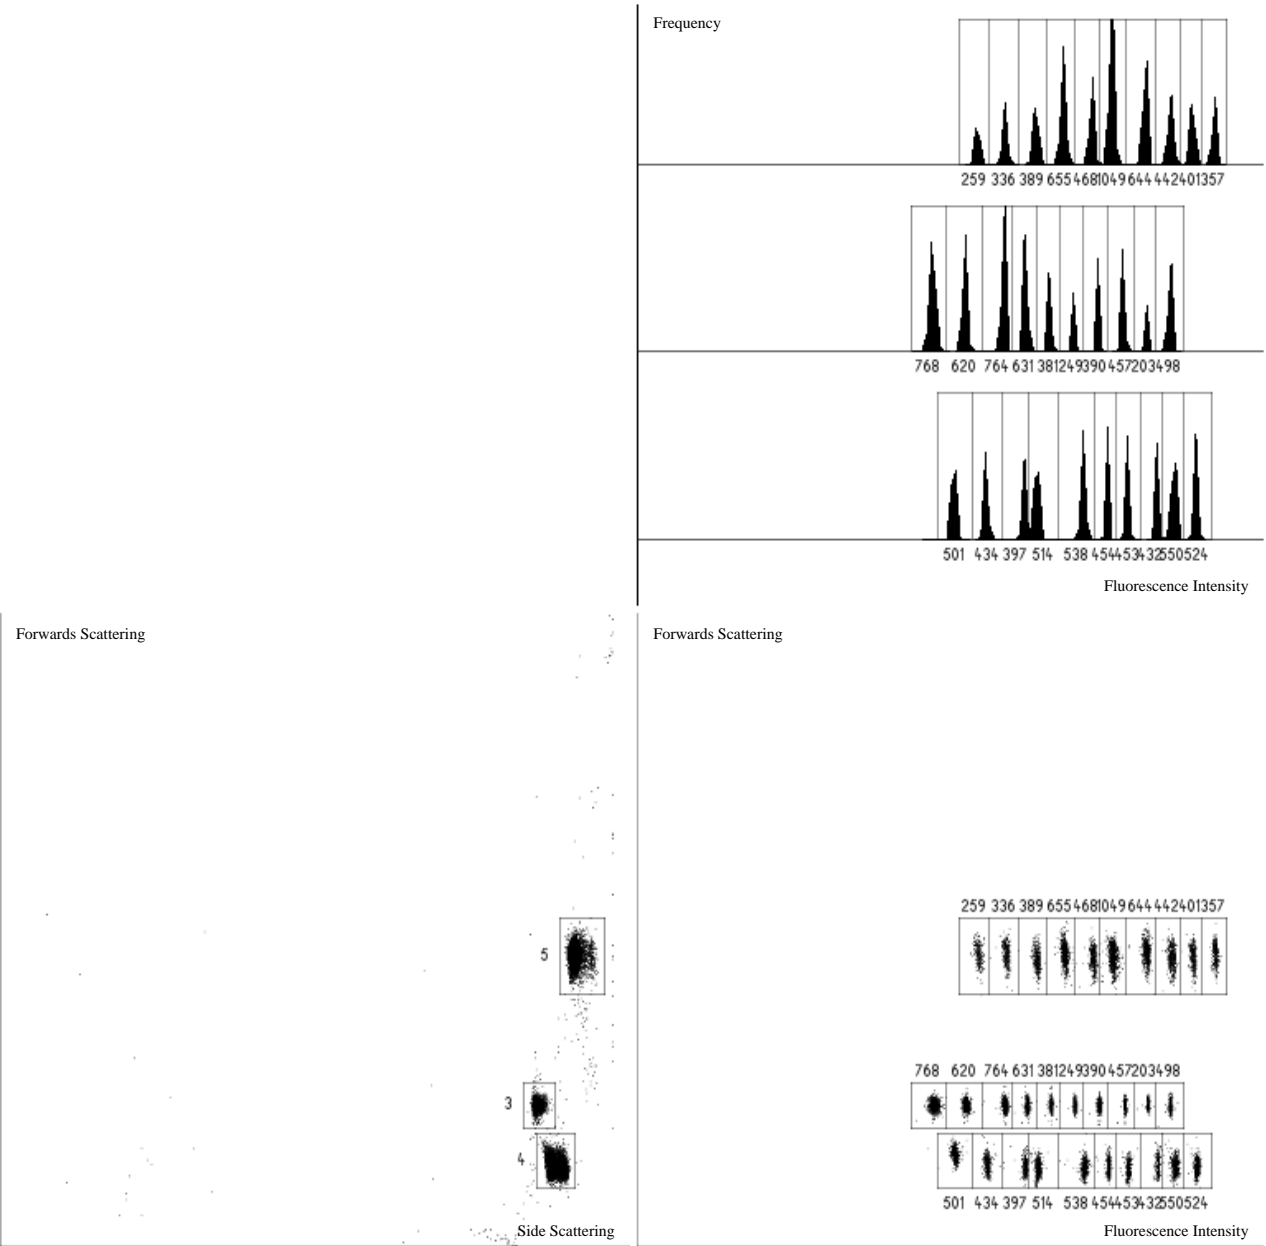

ANNEX 2: TAG REFERENCE SET - TAG DECONVOLUTION SESSION 2

Tag analysis flow cytometry instrument: BD FACSCalibur

Number of gates: 30

Number of beads whose tags were deconvoluted: 27

Number of beads with conclusive tagging data: 18

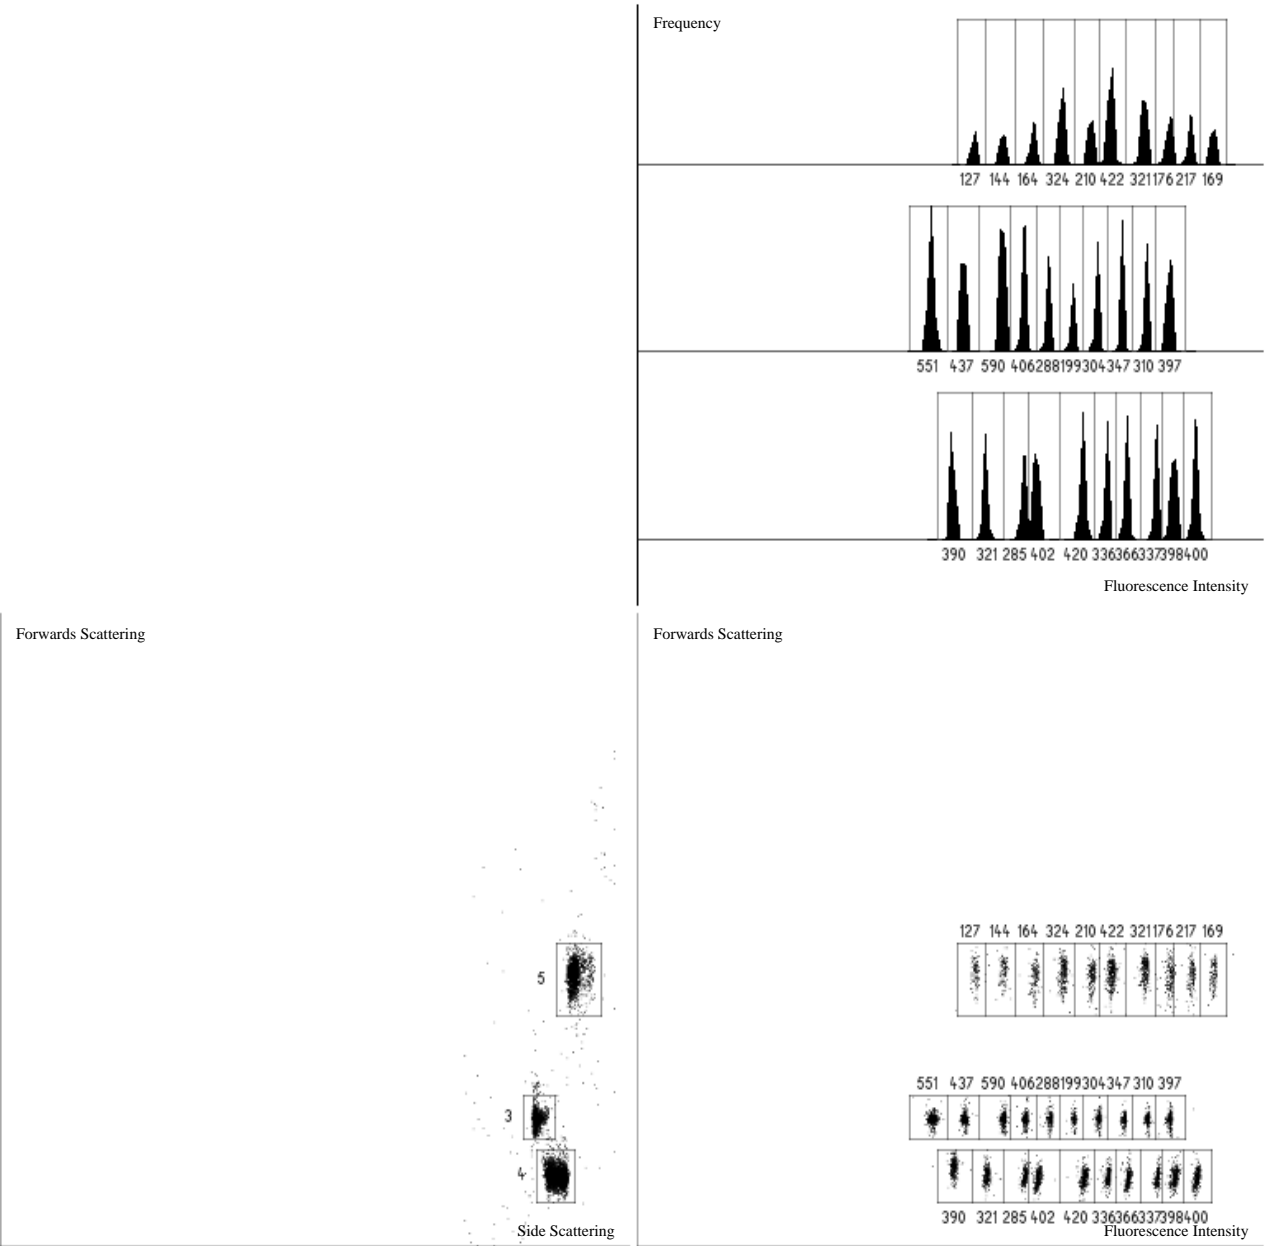

ANNEX 2: TAG REFERENCE SET - TAG DECONVOLUTION SESSION 3

Tag analysis flow cytometry instrument: BD FACSCalibur

Number of gates: 30

Number of beads whose tags were deconvoluted: 27

Number of beads with conclusive tagging data: 21

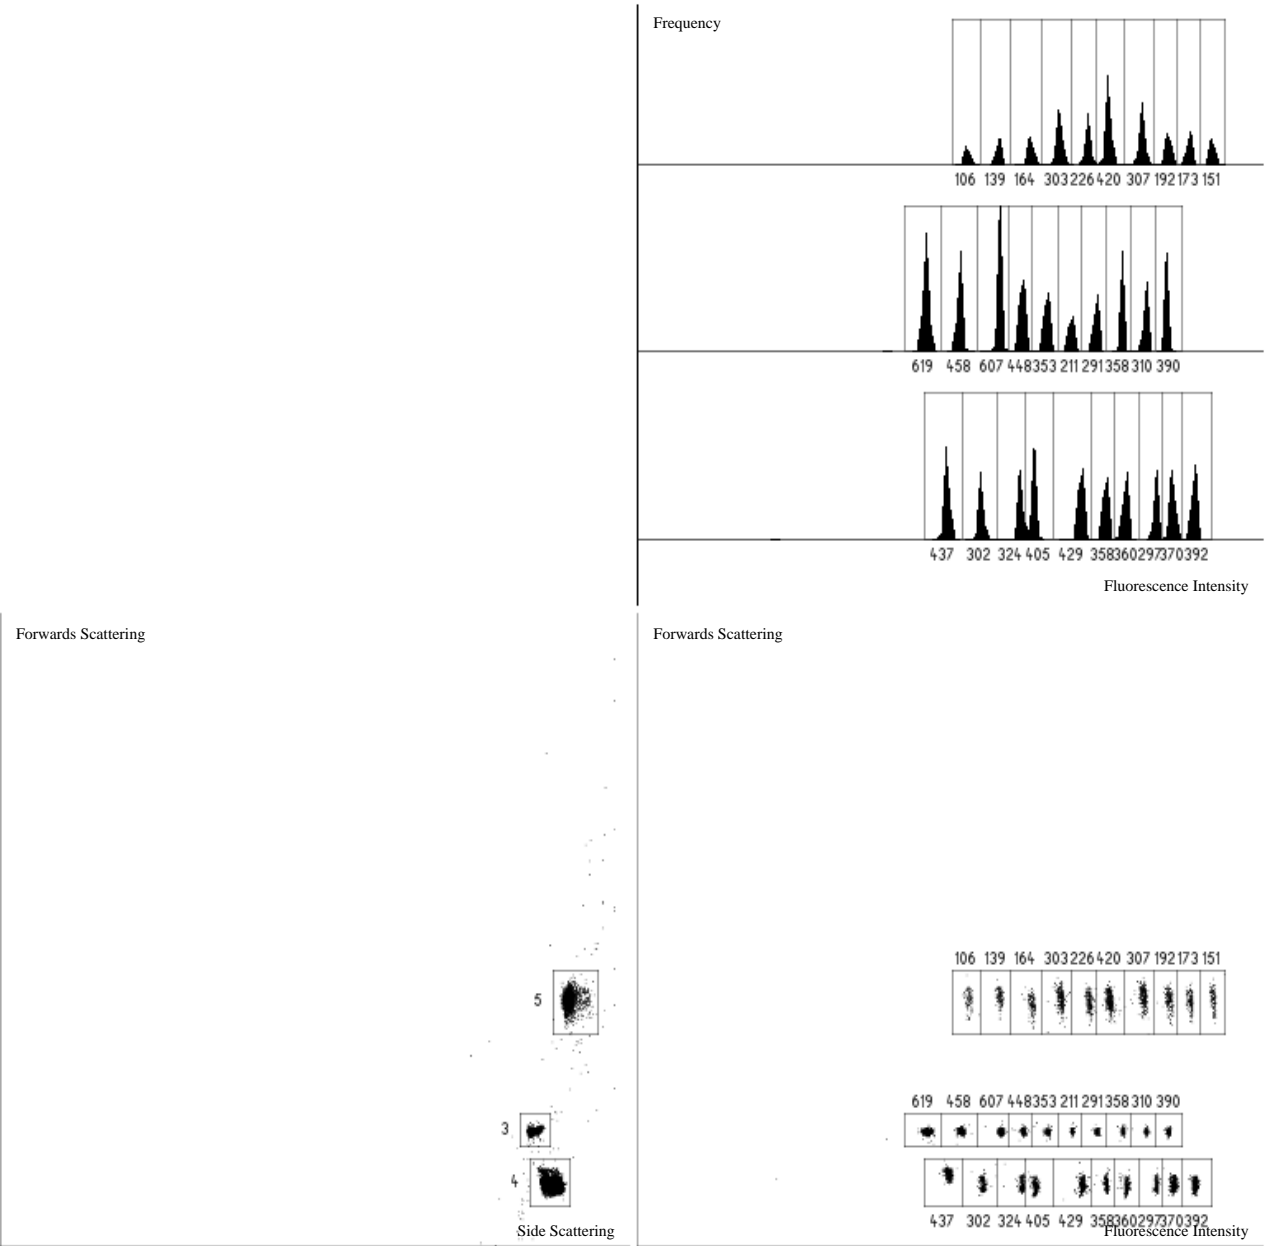



ANNEX 2: TAG REFERENCE SET - TAG DECONVOLUTION SESSION 4

Tag analysis flow cytometry instrument: BD FACSCalibur

Number of gates: 30

Number of beads whose tags were deconvoluted: 16

Number of beads with conclusive tagging data: 15

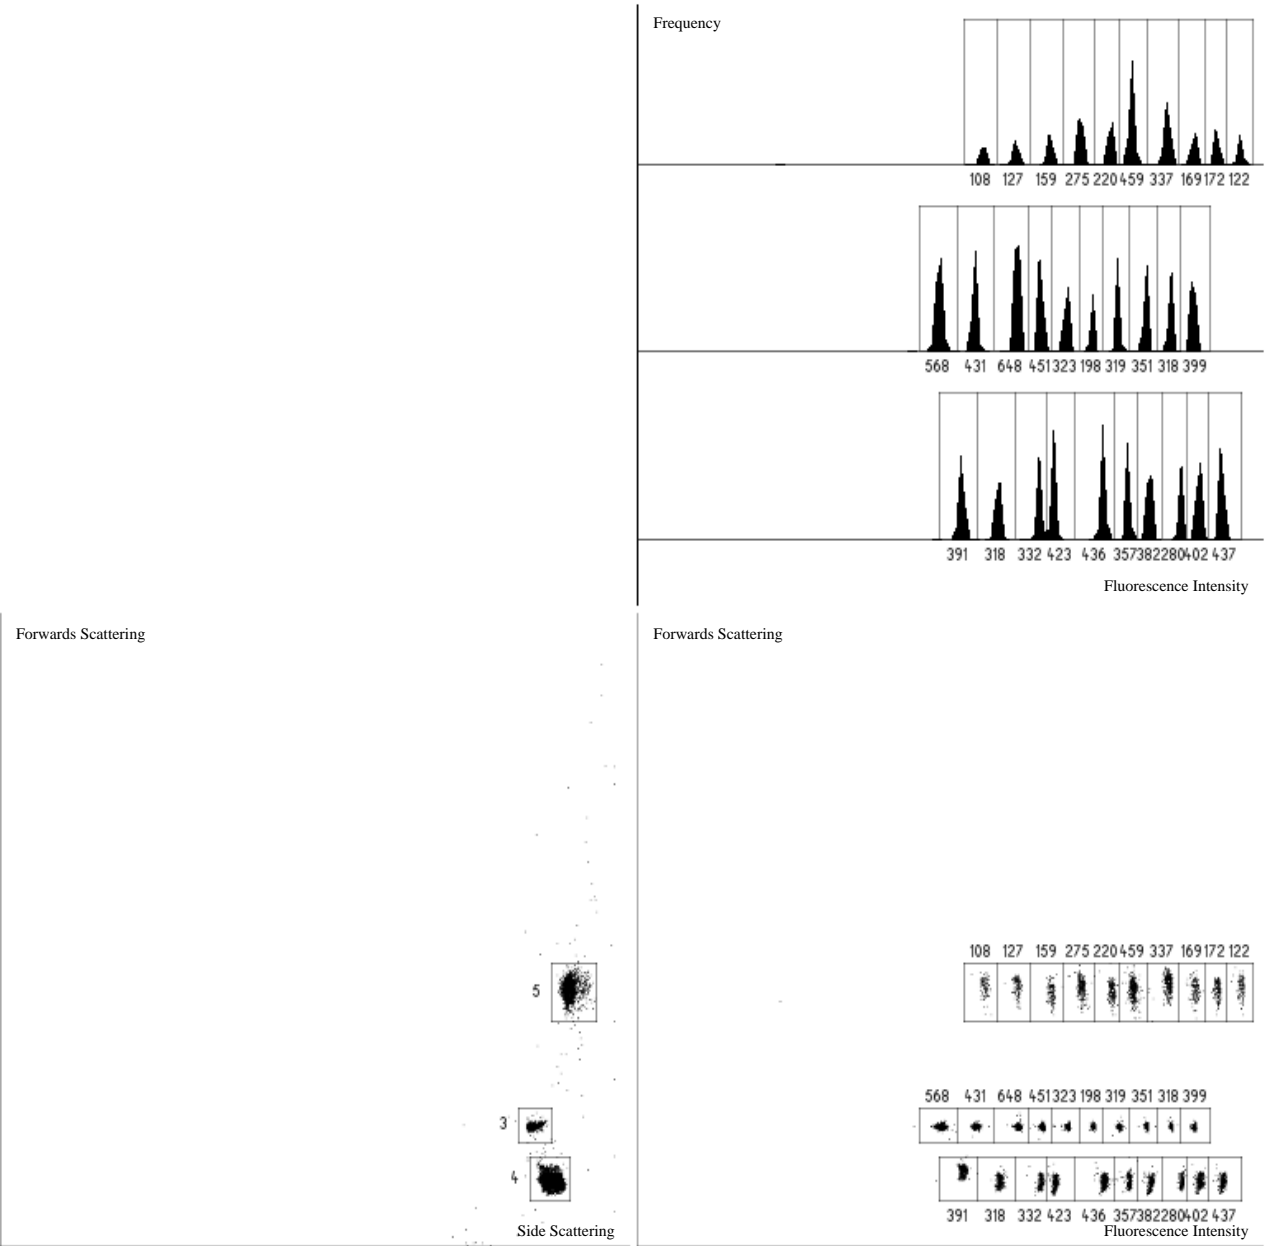

ANNEX 2: TAG REFERENCE SET - TAG DECONVOLUTION SESSION 5

Tag analysis flow cytometry instrument: BD FACSCalibur

Number of gates: 30

Number of beads whose tags were deconvoluted: 37

Number of beads with conclusive tagging data: 23

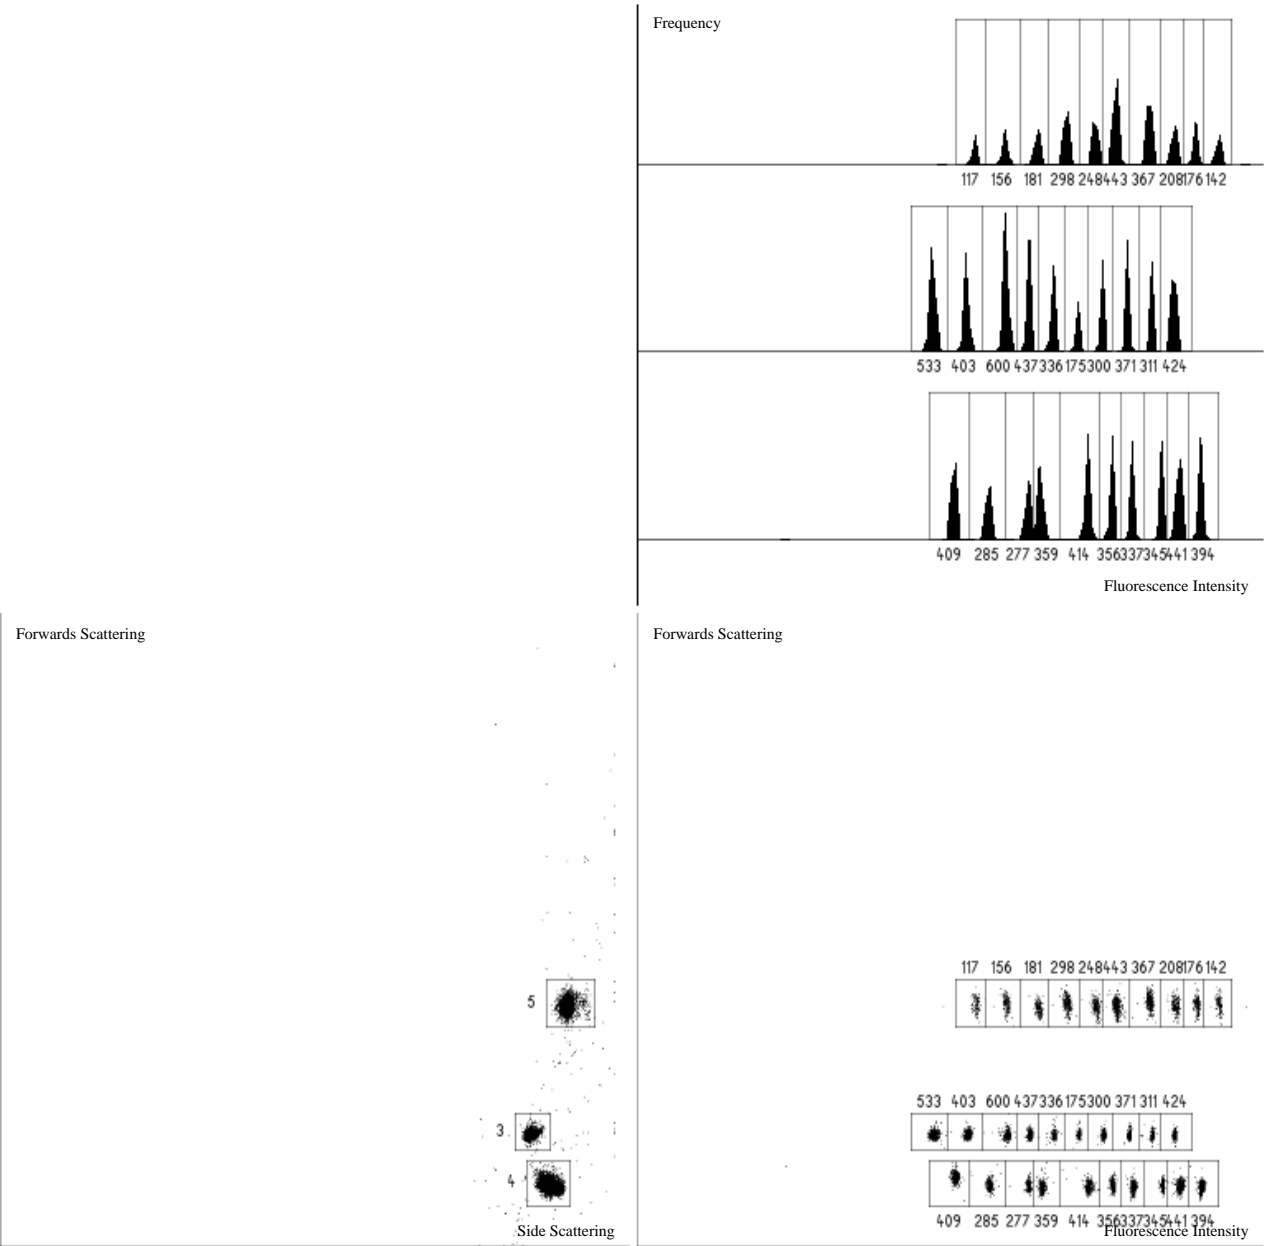

ANNEX 2: TAG REFERENCE SET - TAG DECONVOLUTION SESSION 6

Tag analysis flow cytometry instrument: BD FACSCalibur

Number of gates: 30

Number of beads whose tags were deconvoluted: 20

Number of beads with conclusive tagging data: 11

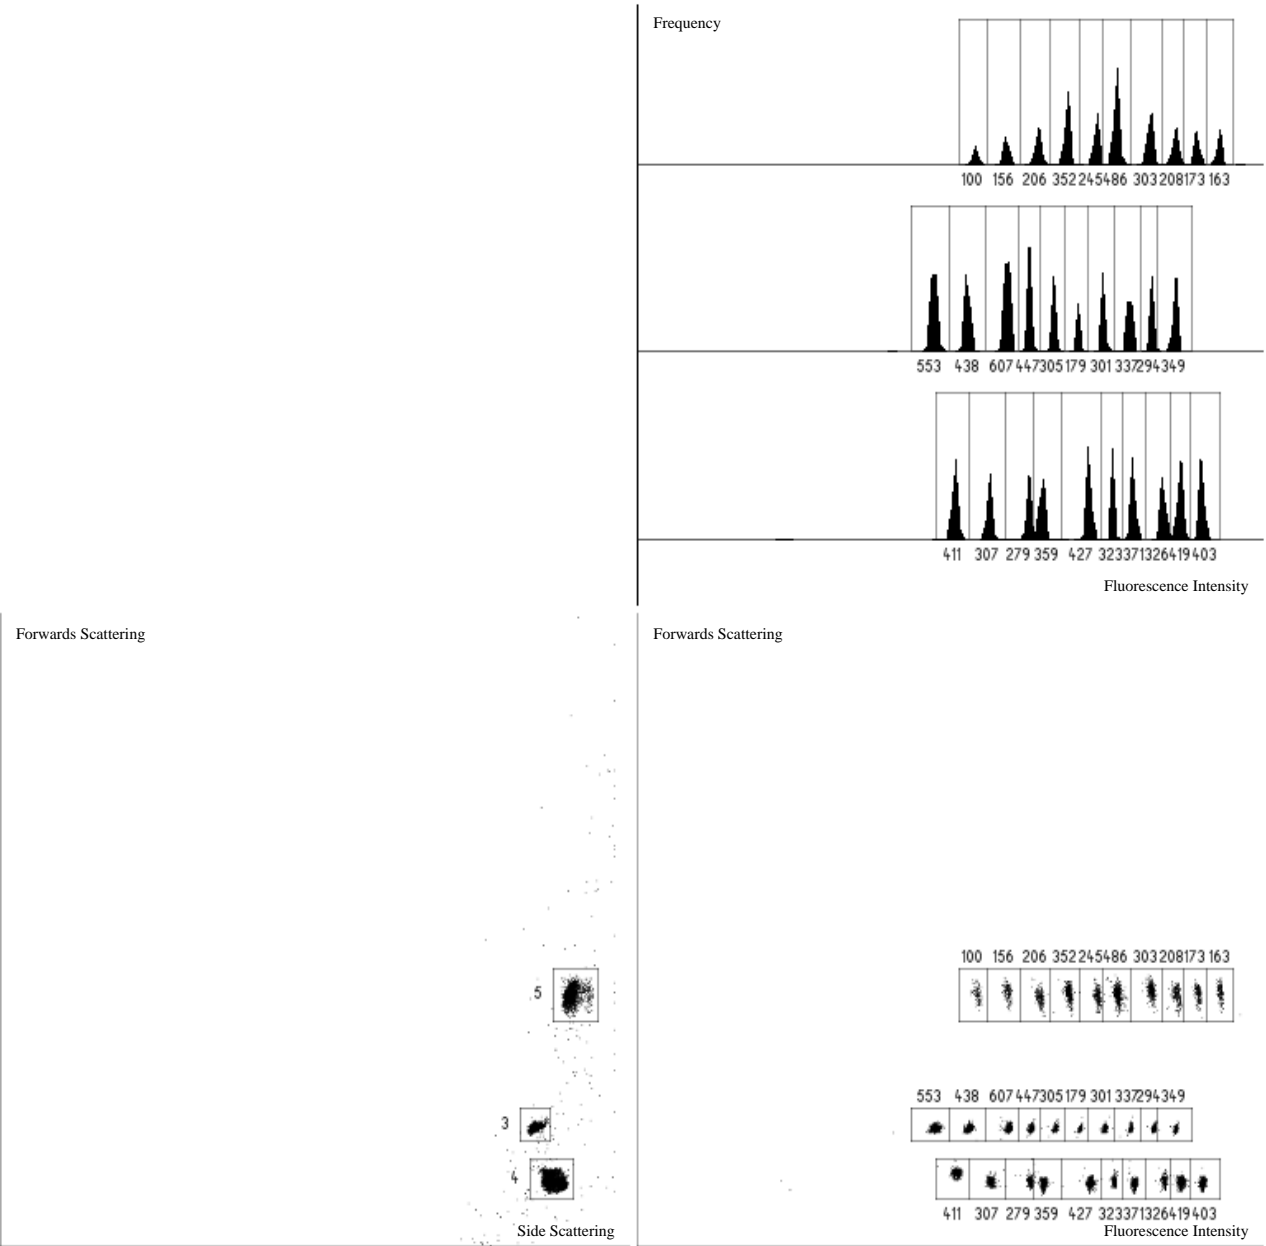

ANNEX 2: TAG REFERENCE SET - TAG DECONVOLUTION SESSION 7

Tag analysis flow cytometry instrument: BD FACSCalibur

Number of gates: 30

Number of beads whose tags were deconvoluted: 7

Number of beads with conclusive tagging data: 3

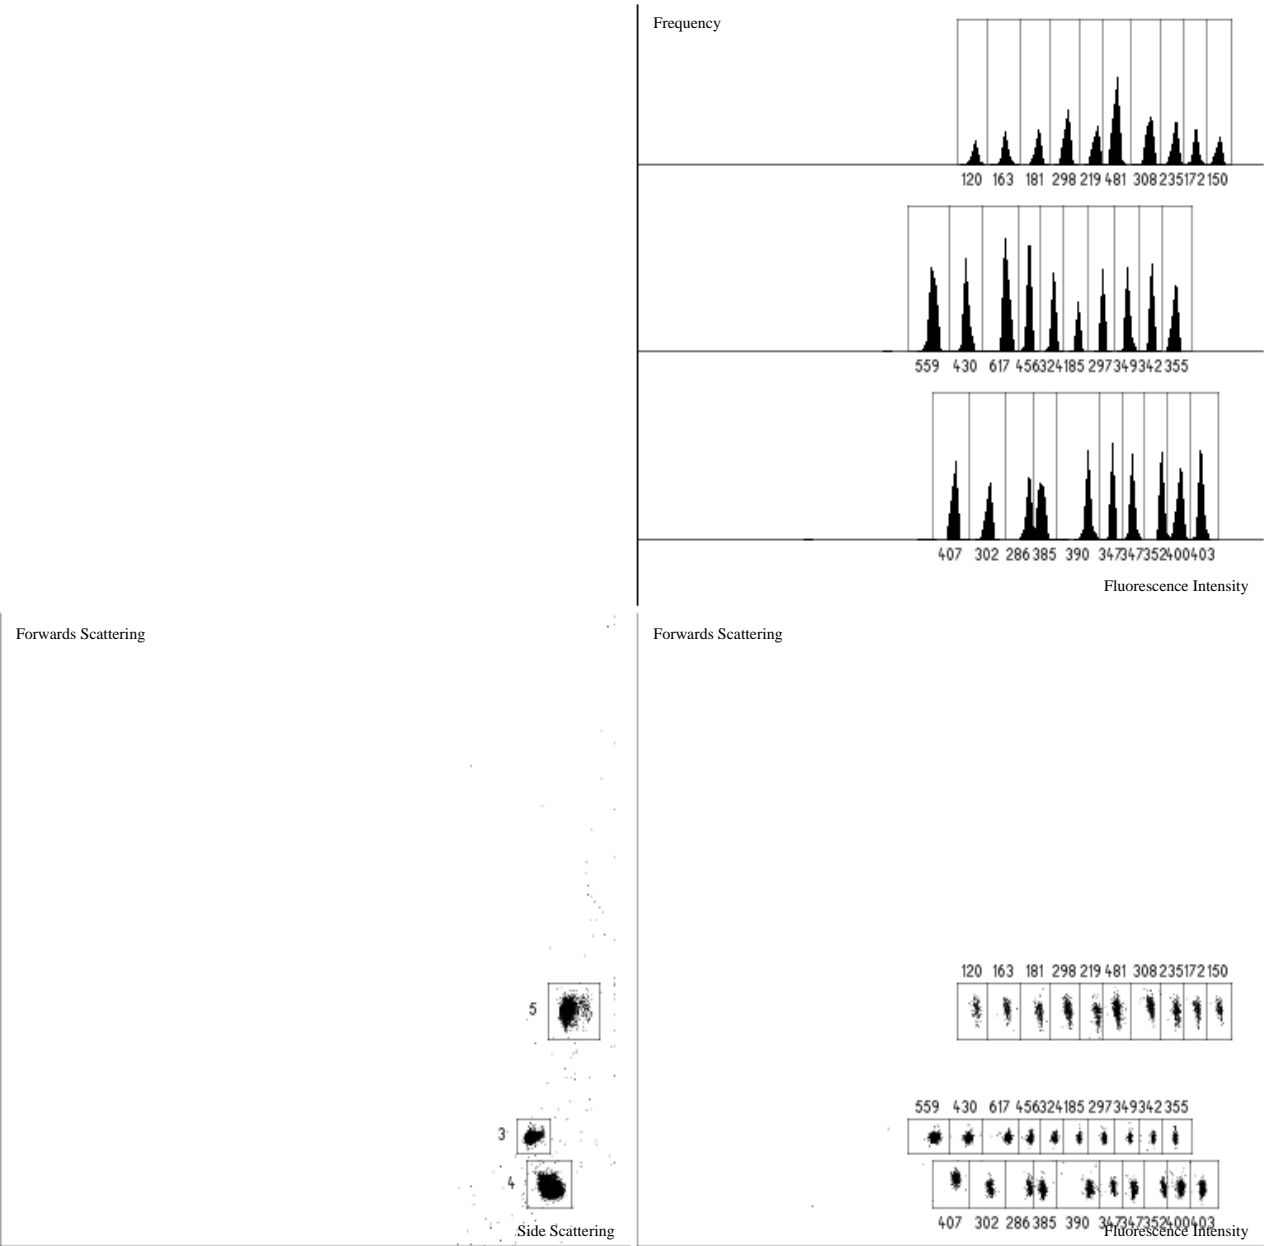

ANNEX 2: TAG REFERENCE SET - TAG DECONVOLUTION SESSION 8

Tag analysis flow cytometry instrument: BD FACSCalibur

Number of gates: 30

Number of beads whose tags were deconvoluted: 27

Number of beads with conclusive tagging data: 24

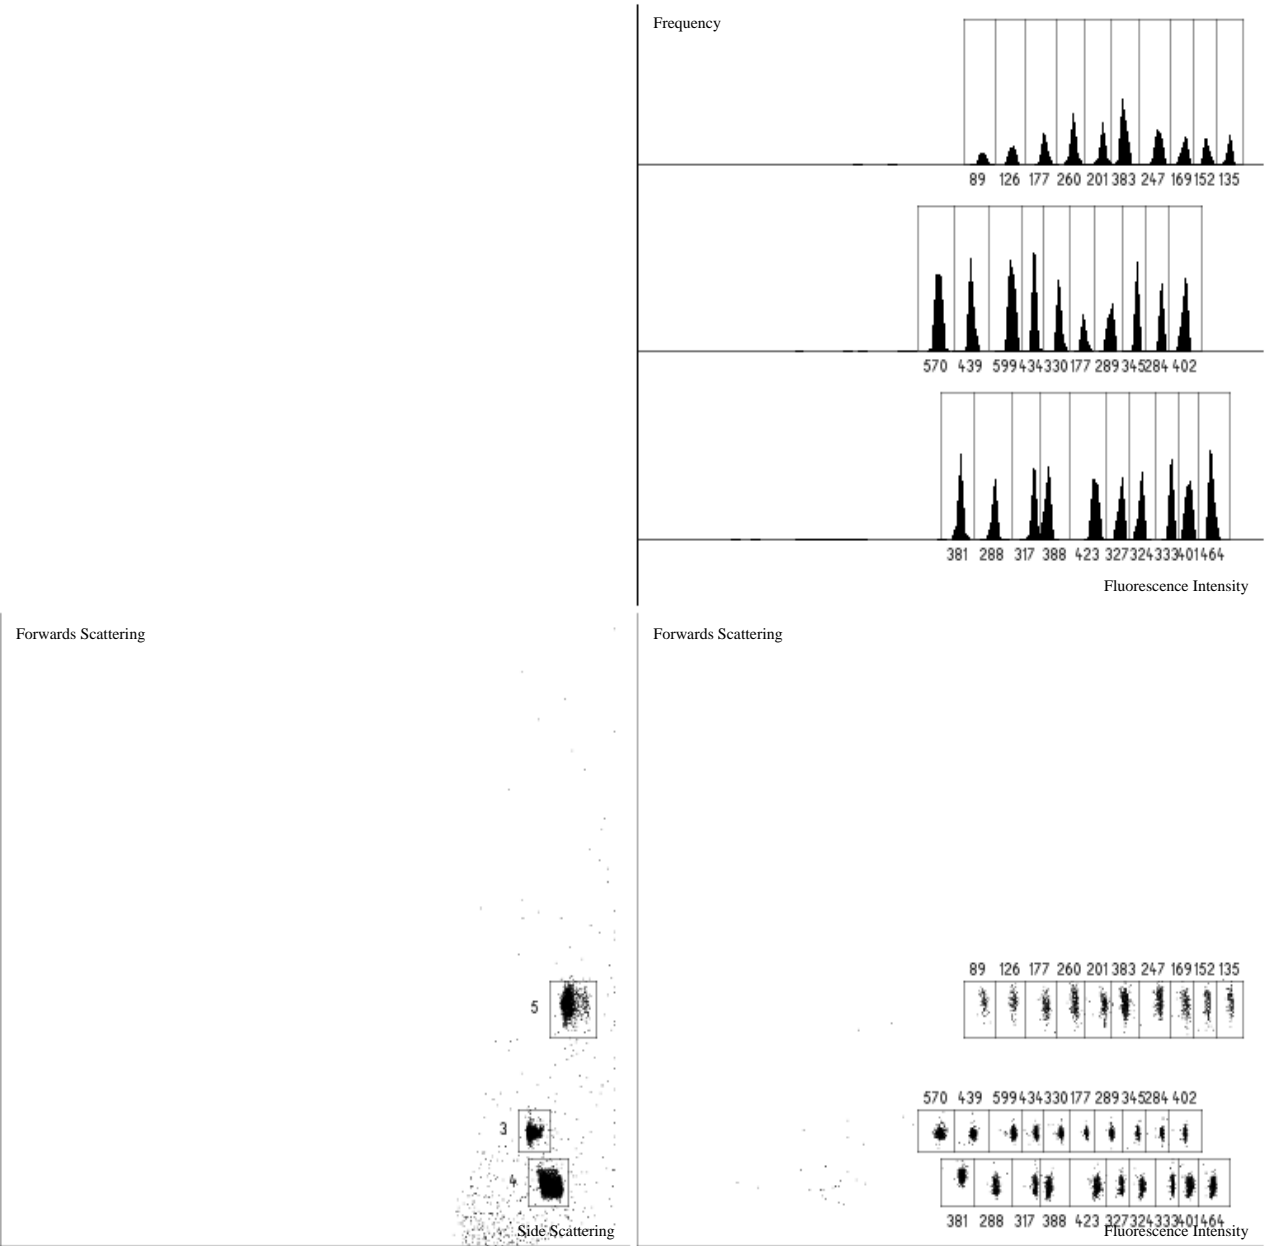

ANNEX 2: TAG REFERENCE SET - TAG DECONVOLUTION SESSION 9

Tag analysis flow cytometry instrument: BD FACSCalibur

Number of gates: 30

Number of beads whose tags were deconvoluted: 53

Number of beads with conclusive tagging data: 43

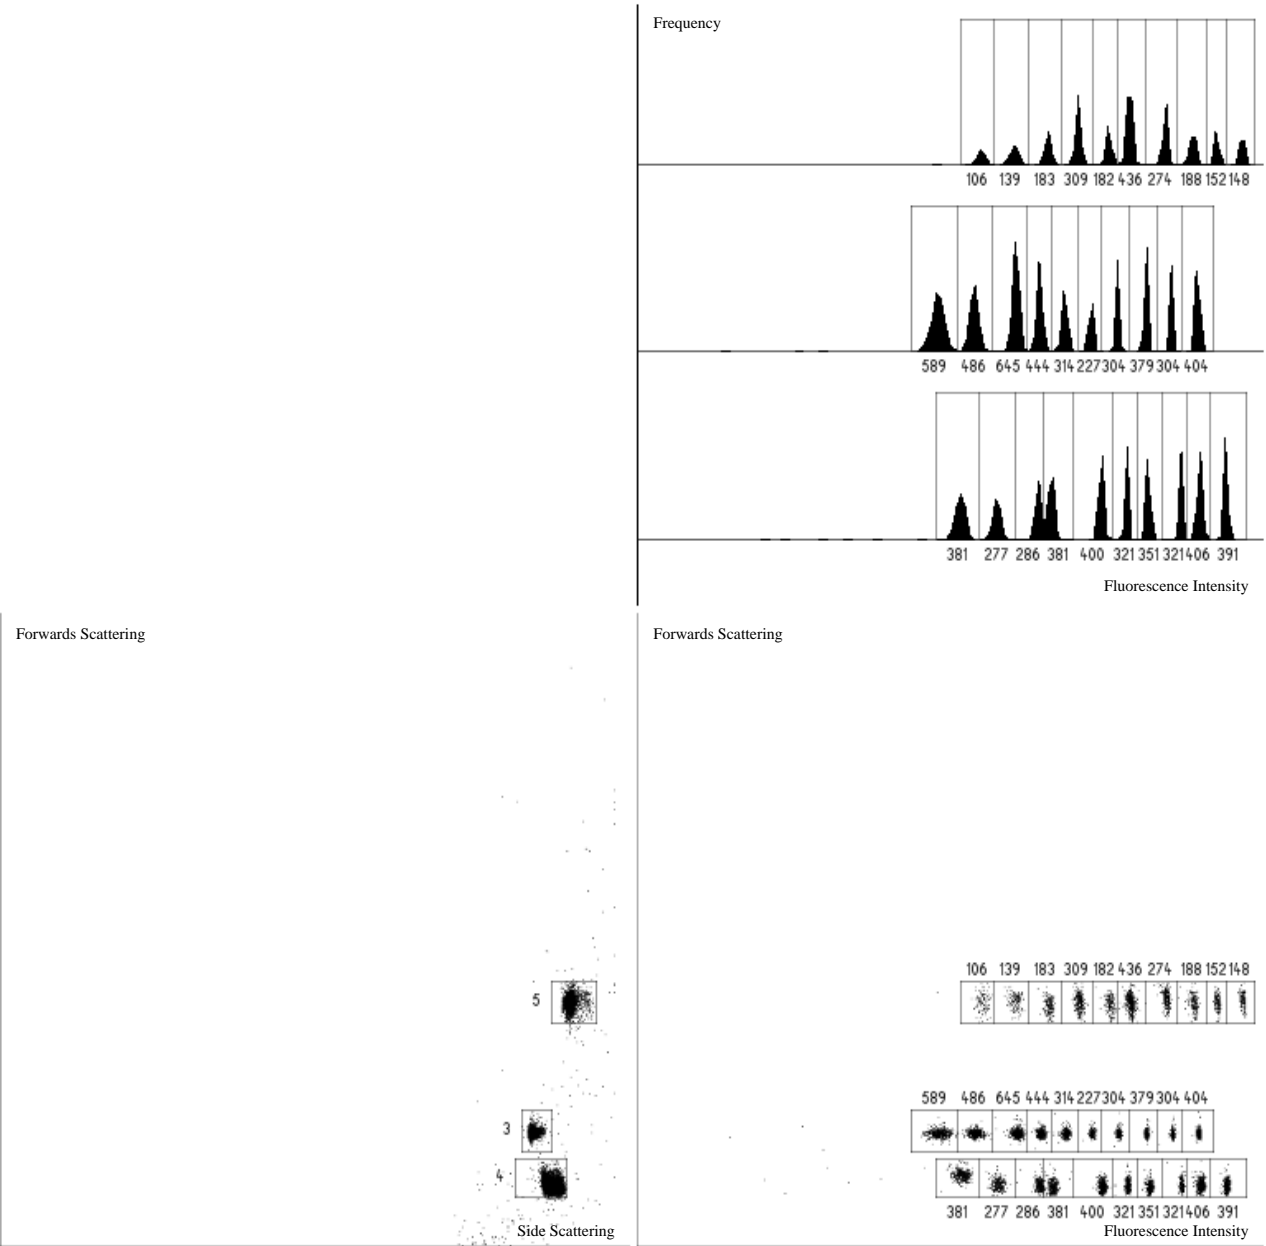

ANNEX 2: TAG REFERENCE SET - TAG DECONVOLUTION SESSION 10

Tag analysis flow cytometry instrument: BD FACSCalibur

Number of gates: 30

Number of beads whose tags were deconvoluted: 22

Number of beads with conclusive tagging data: 17

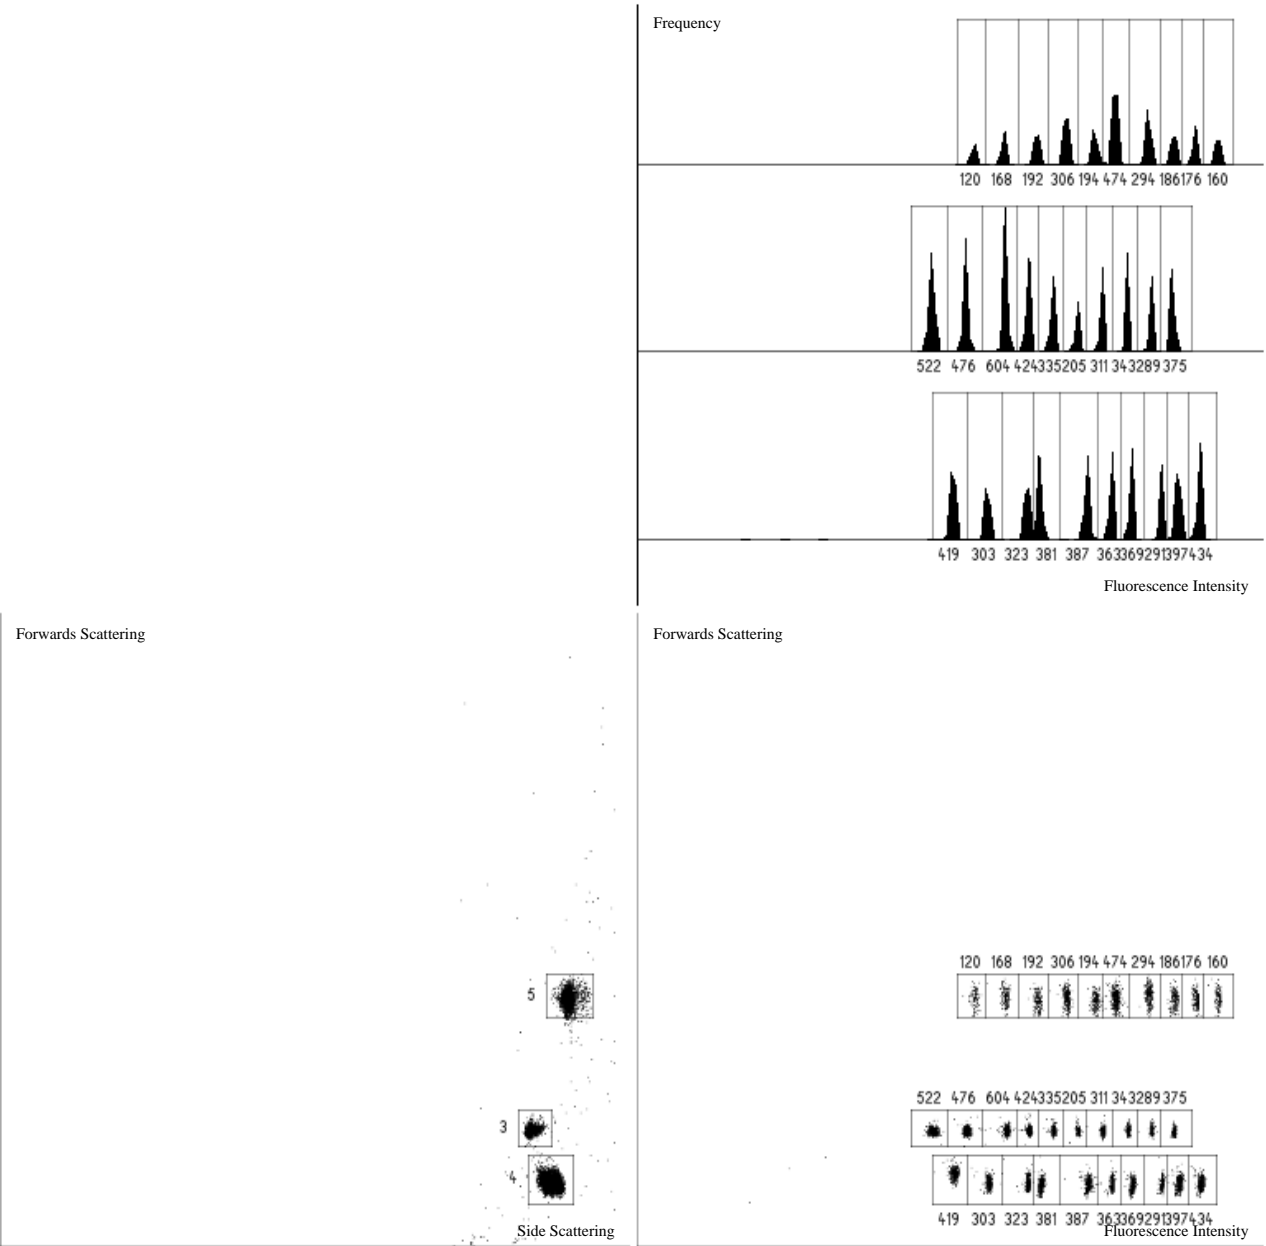

ANNEX 2: TAG REFERENCE SET - TAG DECONVOLUTION SESSION 11

Tag analysis flow cytometry instrument: BD FACSCalibur

Number of gates: 30

Number of beads whose tags were deconvoluted: 19

Number of beads with conclusive tagging data: 16

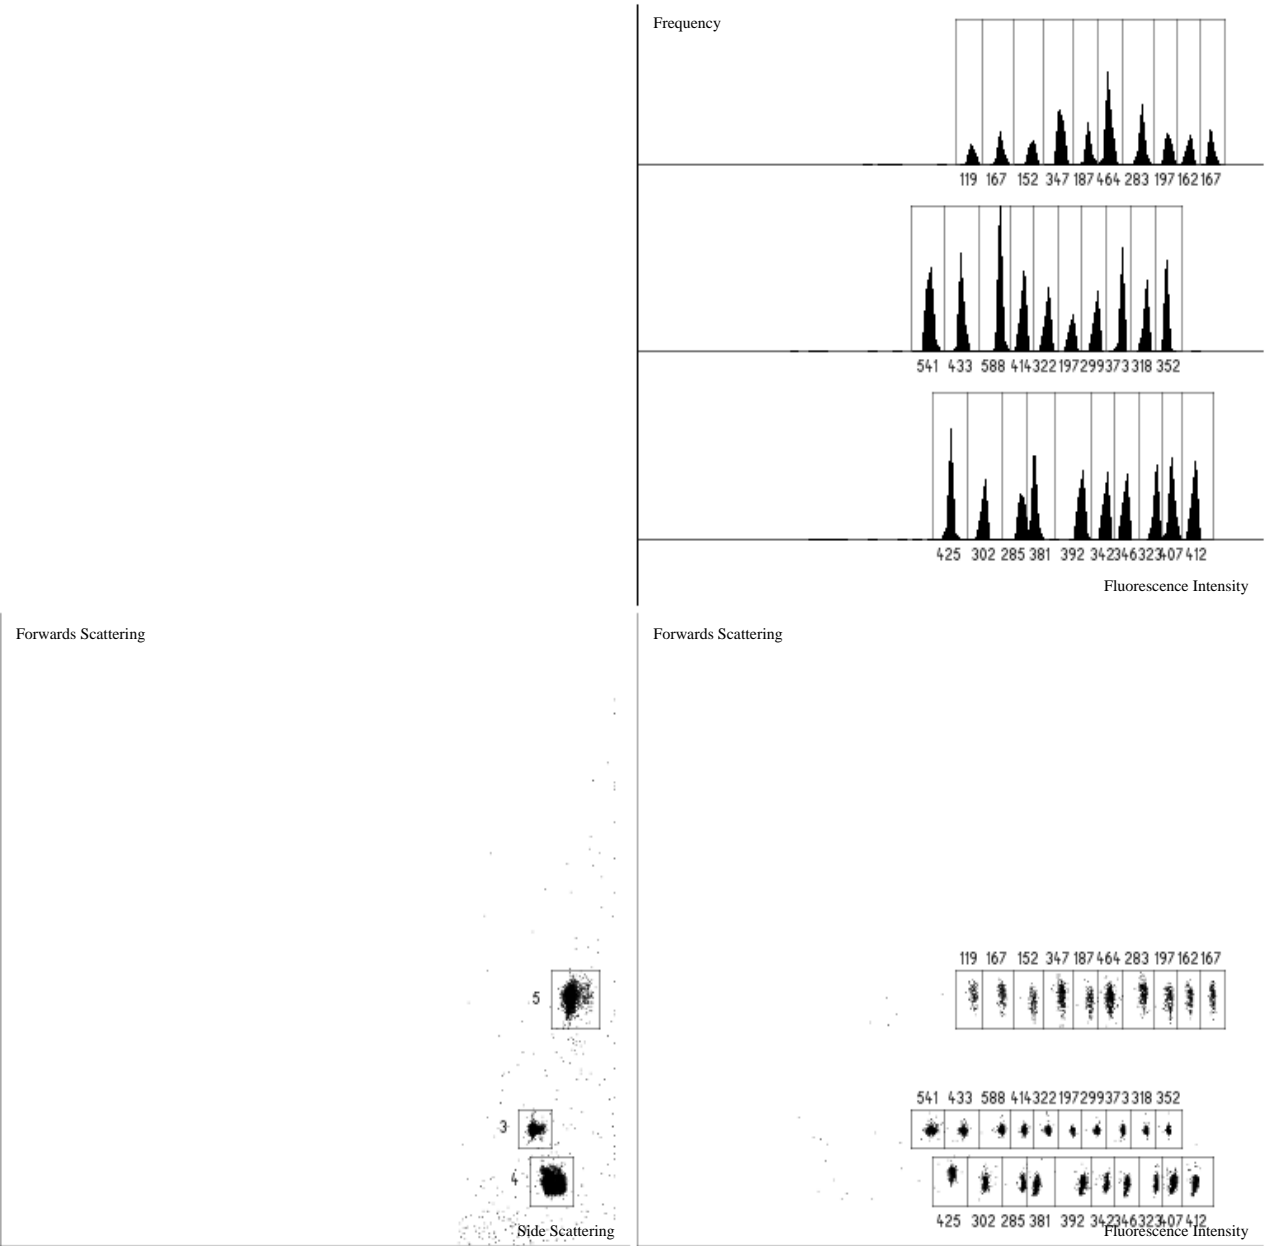



ANNEX 2: TAG REFERENCE SET - TAG DECONVOLUTION SESSION 12

Tag analysis flow cytometry instrument: BD FACSCalibur

Number of gates: 30

Number of beads whose tags were deconvoluted: 3

Number of beads with conclusive tagging data: 2

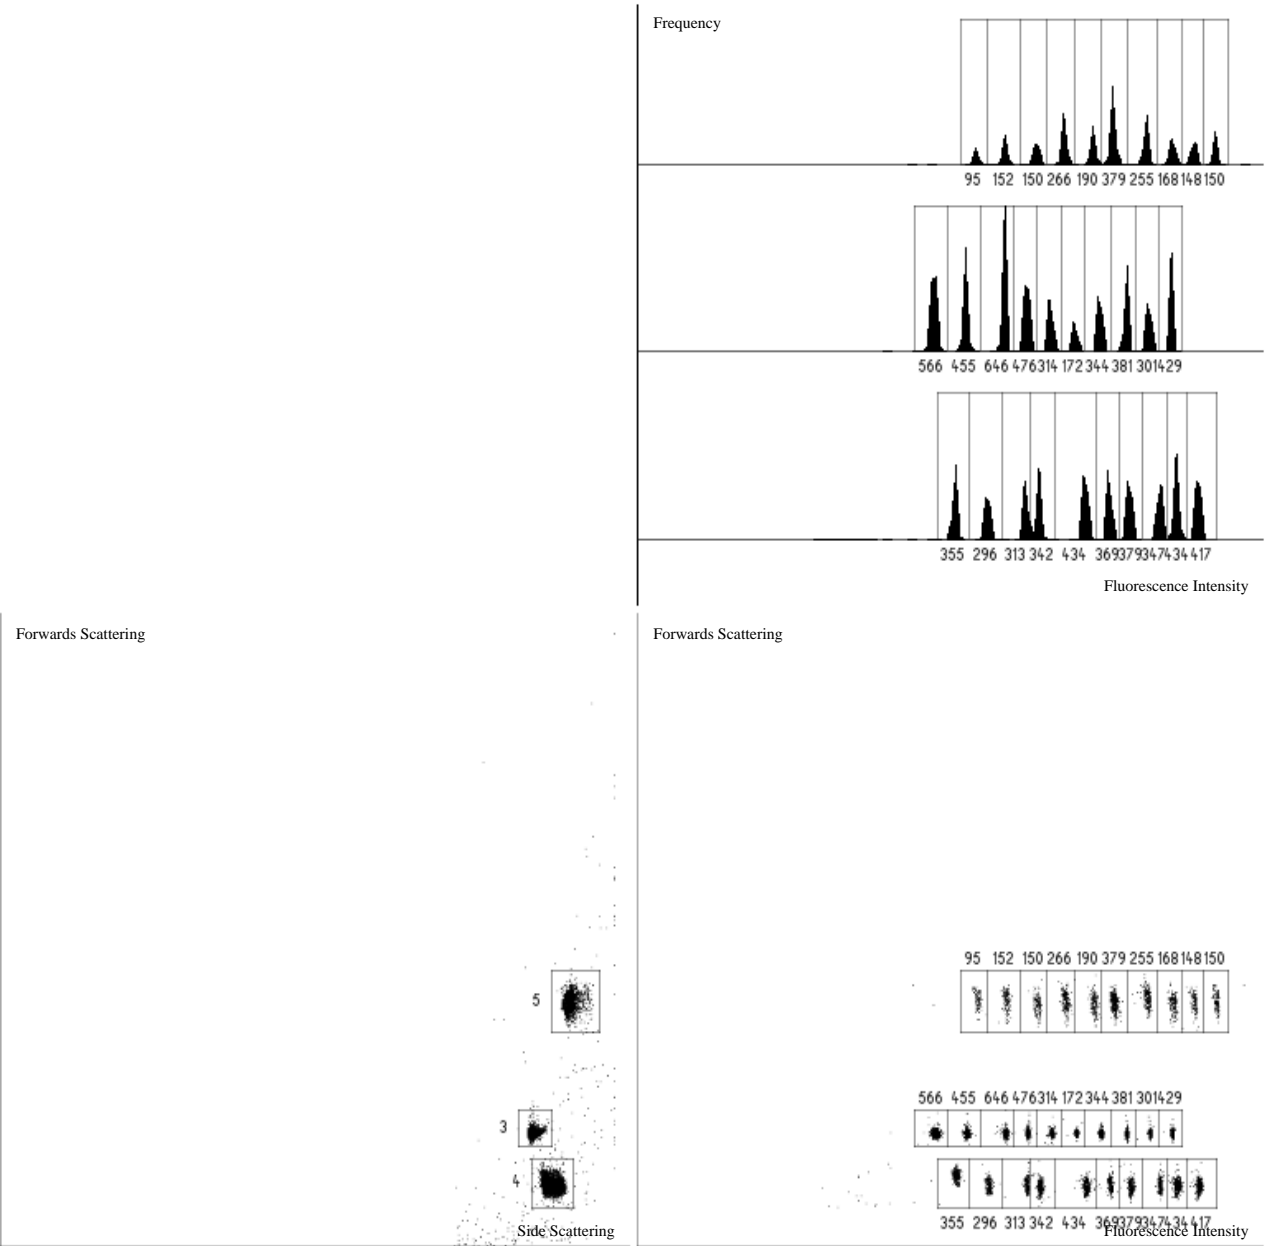

ANNEX 2: TAG REFERENCE SET - TAG DECONVOLUTION SESSION 13

Tag analysis flow cytometry instrument: BD FACSCalibur

Number of gates: 30

Number of beads whose tags were deconvoluted: 20

Number of beads with conclusive tagging data: 13

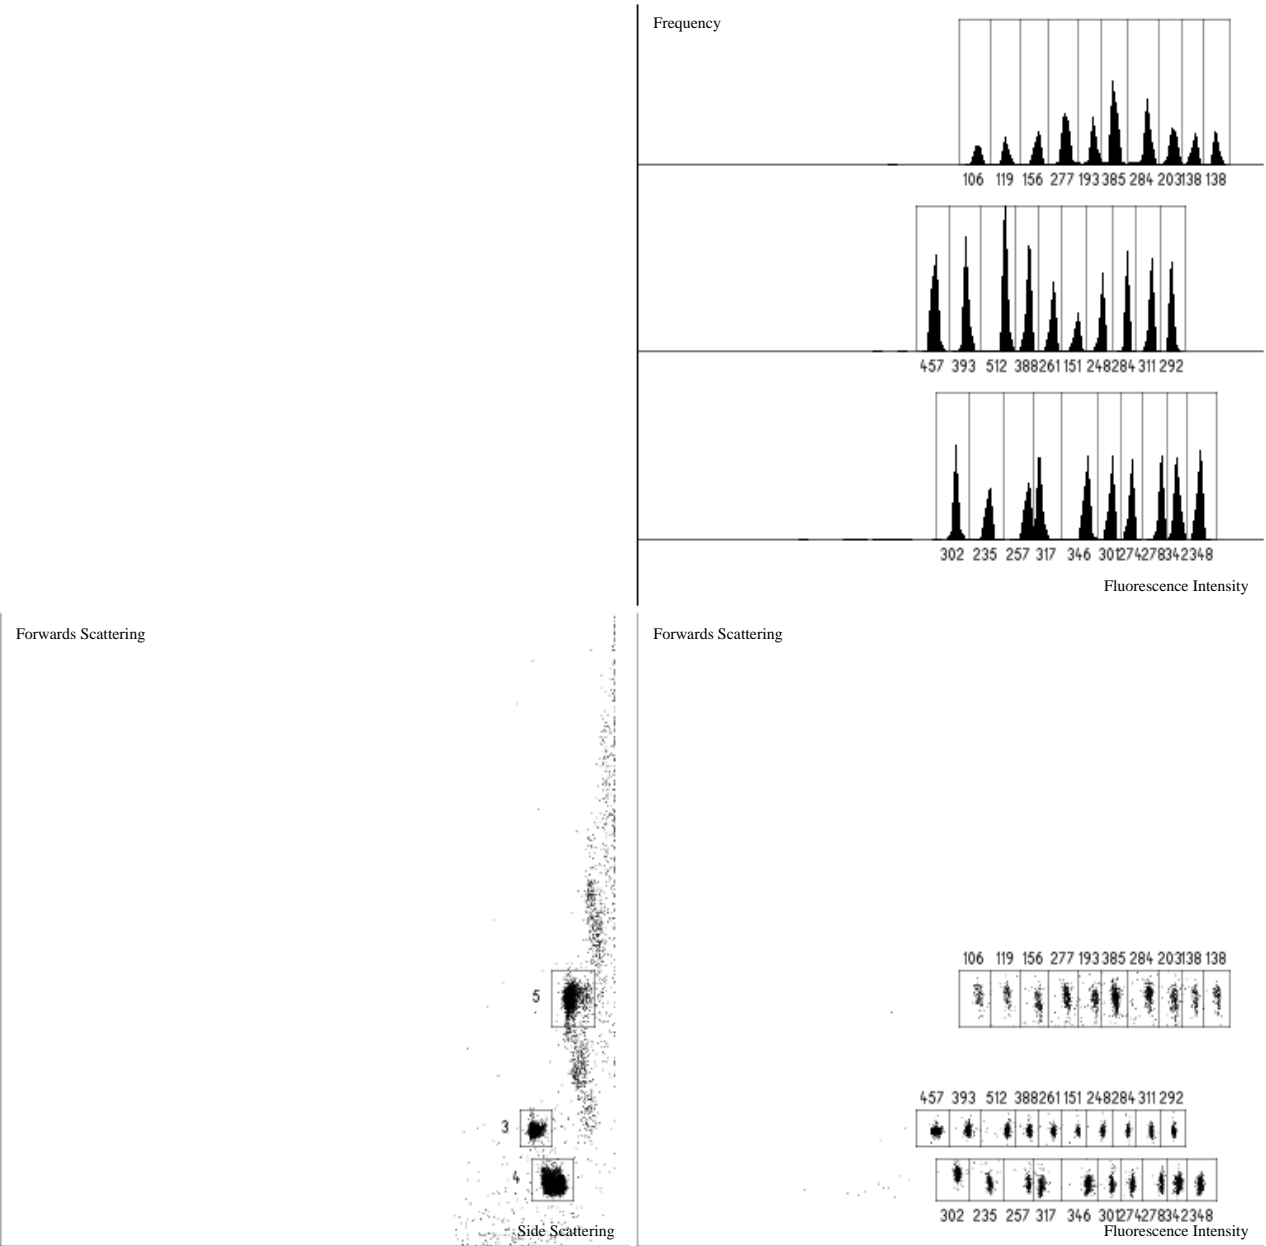

ANNEX 2: TAG REFERENCE SET - TAG DECONVOLUTION SESSION 14

Tag analysis flow cytometry instrument: BD FACSCalibur

Number of gates: 30

Number of beads whose tags were deconvoluted: 24

Number of beads with conclusive tagging data: 16

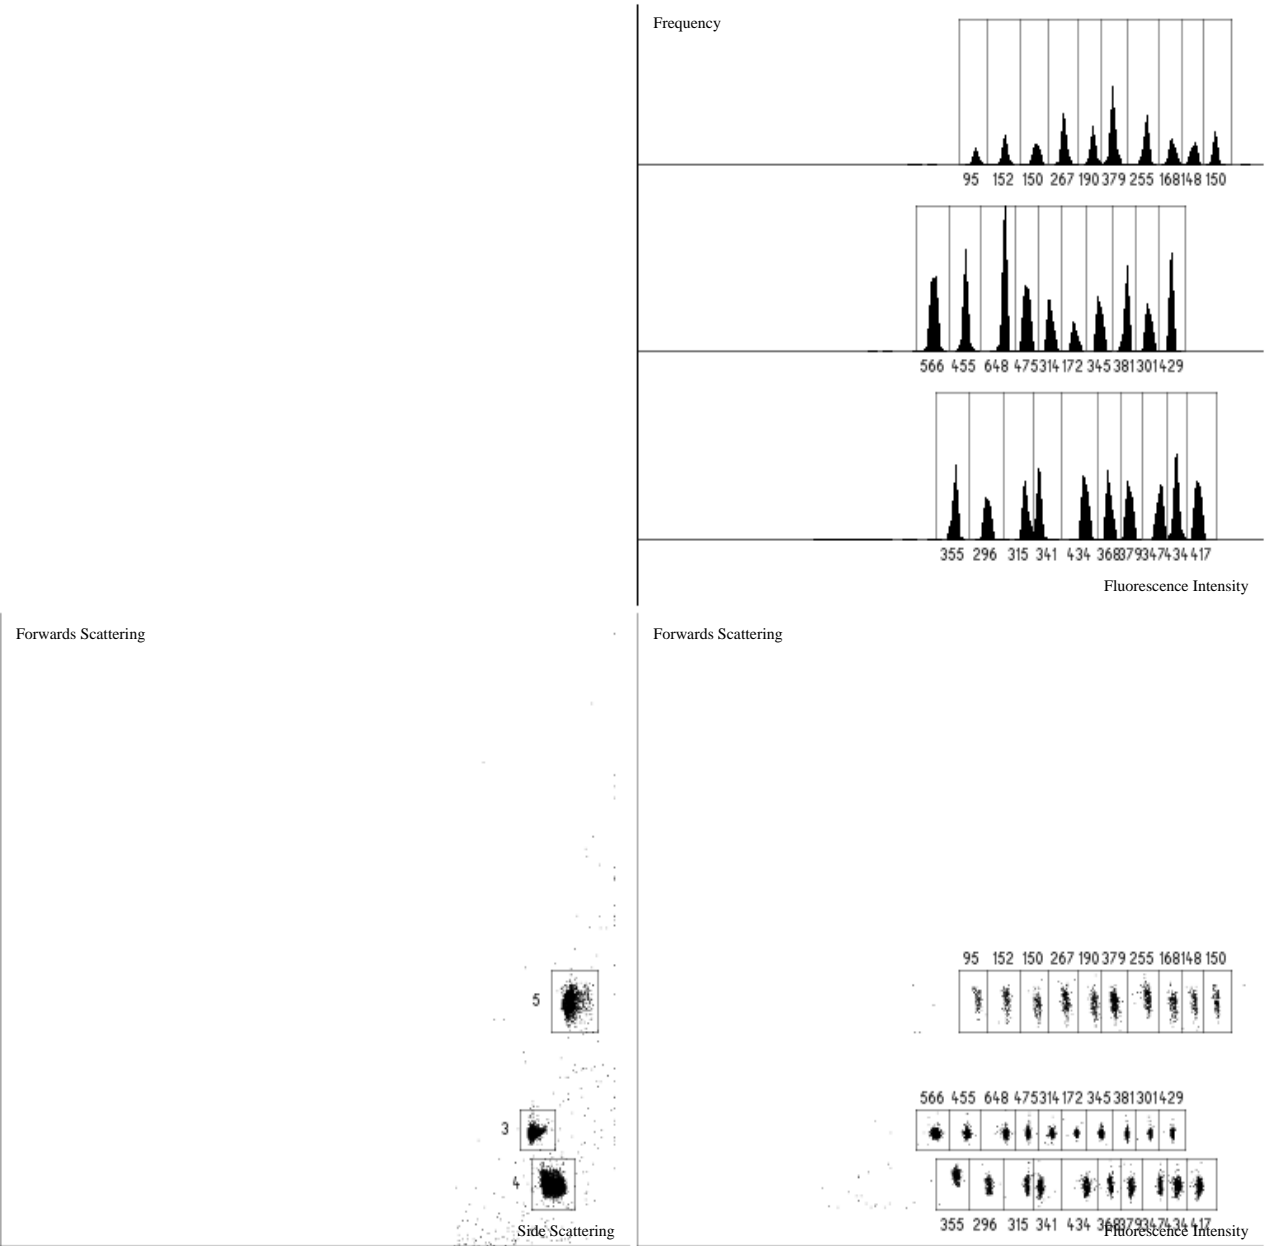

ANNEX 2: TAG REFERENCE SET - TAG DECONVOLUTION SESSION 15

Tag analysis flow cytometry instrument: BD FACSCalibur

Number of gates: 30

Number of beads whose tags were deconvoluted: 12

Number of beads with conclusive tagging data: 8

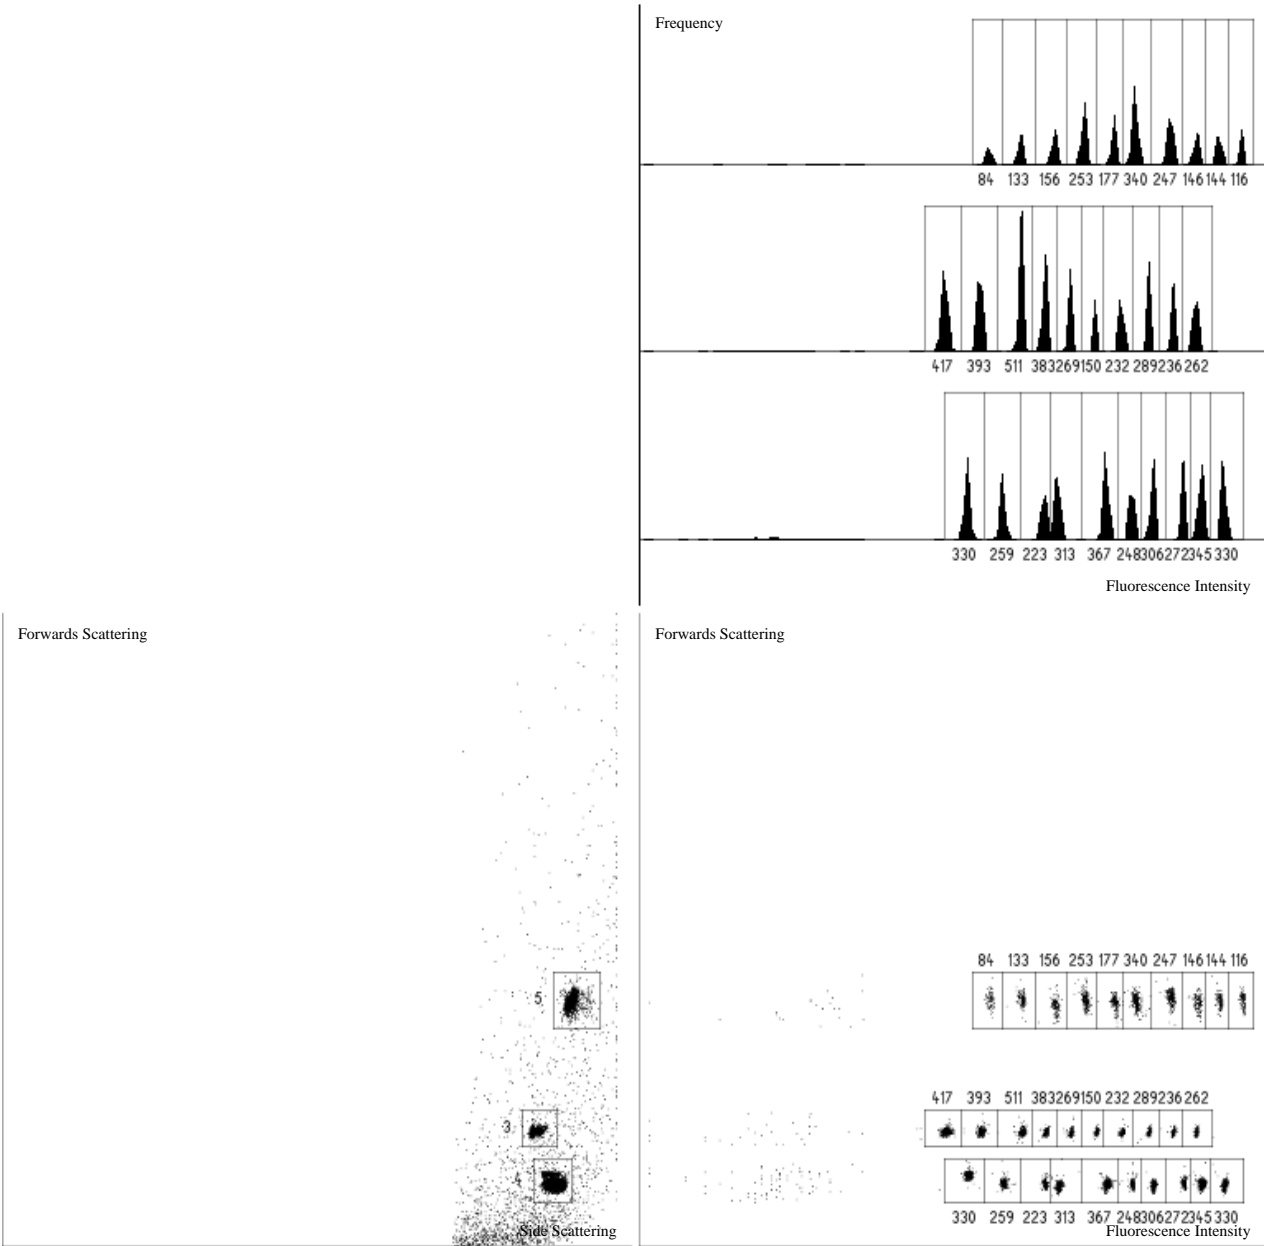

ANNEX 2: TAG REFERENCE SET - TAG DECONVOLUTION SESSION 16

Tag analysis flow cytometry instrument: BD FACSCalibur

Number of gates: 30

Number of beads whose tags were deconvoluted: 41

Number of beads with conclusive tagging data: 33

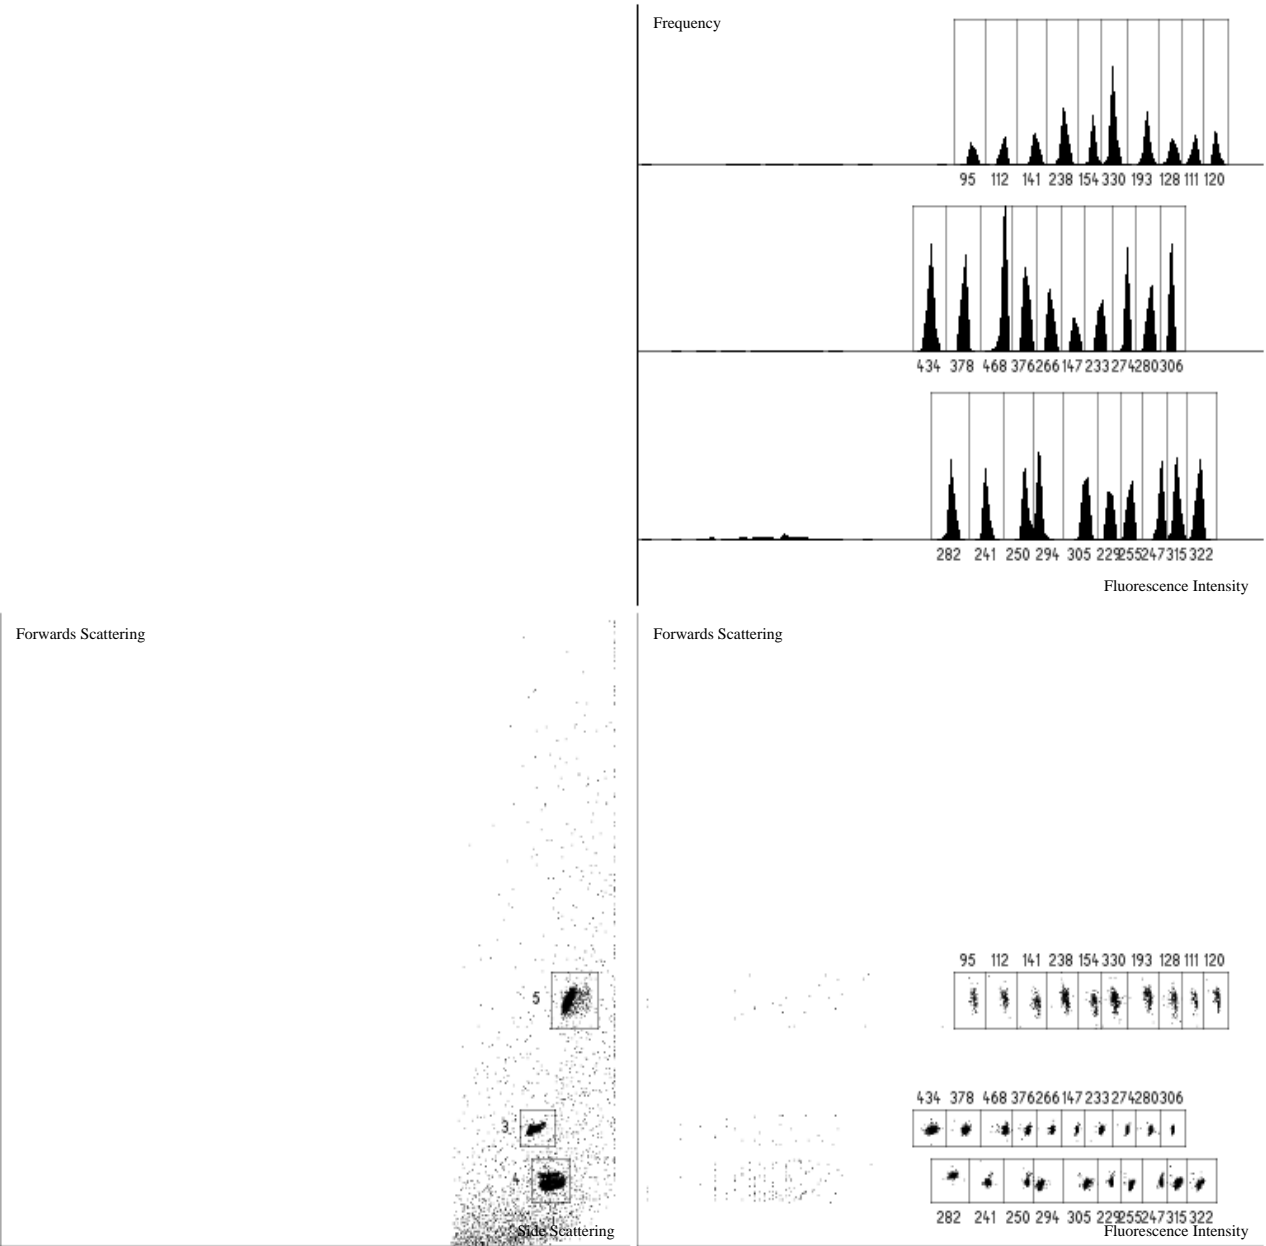

ANNEX 2: TAG REFERENCE SET - TAG DECONVOLUTION SESSION 17

Tag analysis flow cytometry instrument: BD FACSCalibur

Number of gates: 30

Number of beads whose tags were deconvoluted: 12

Number of beads with conclusive tagging data: 10

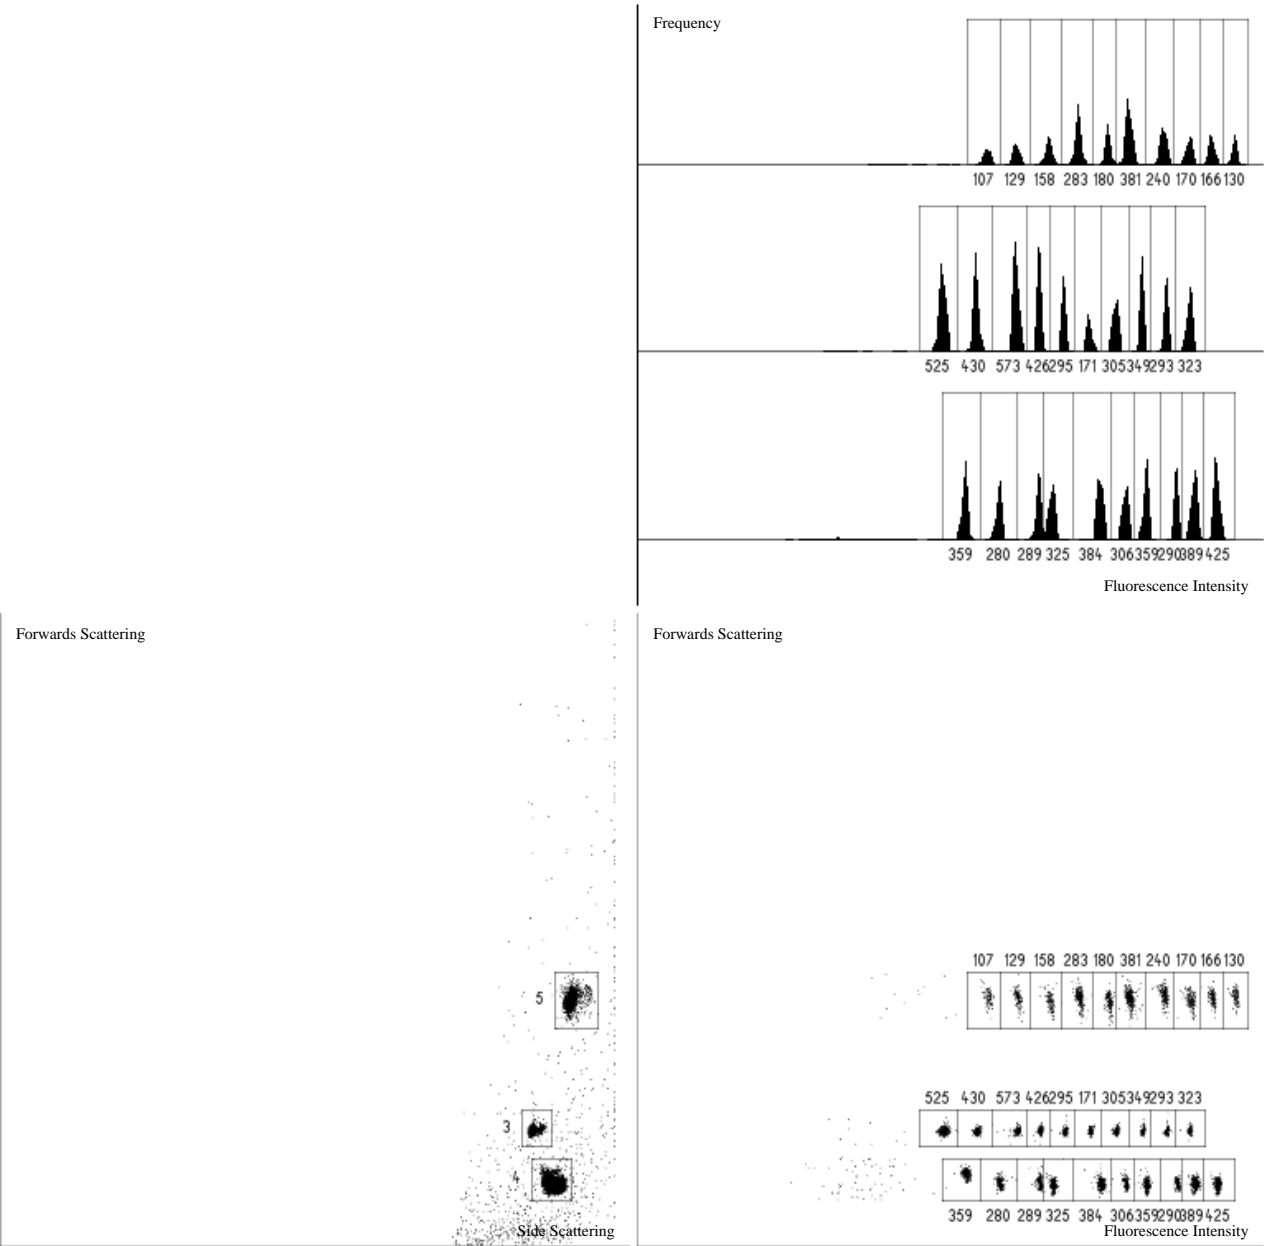

ANNEX 2: TAG REFERENCE SET - TAG DECONVOLUTION SESSION 18

Tag analysis flow cytometry instrument: BD FACSCalibur

Number of gates: 30

Number of beads whose tags were deconvoluted: 36

Number of beads with conclusive tagging data: 25

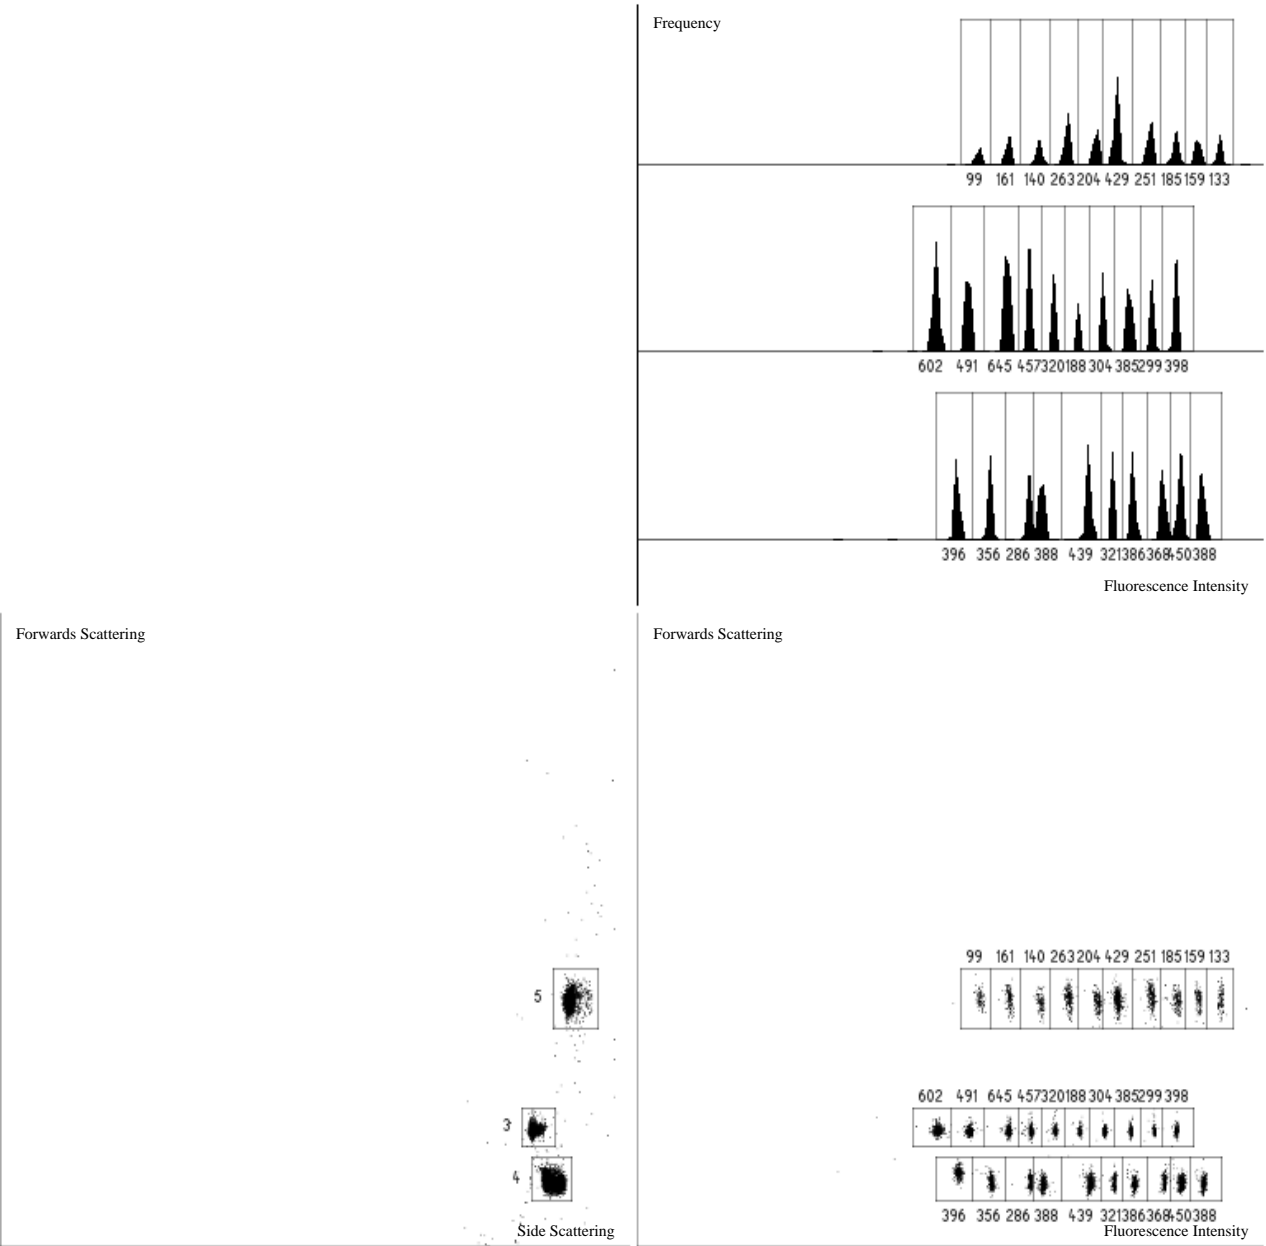

ANNEX 2: TAG REFERENCE SET - TAG DECONVOLUTION SESSION 19

Tag analysis flow cytometry instrument: BD FACSCalibur

Number of gates: 30

Number of beads whose tags were deconvoluted: 42

Number of beads with conclusive tagging data: 32

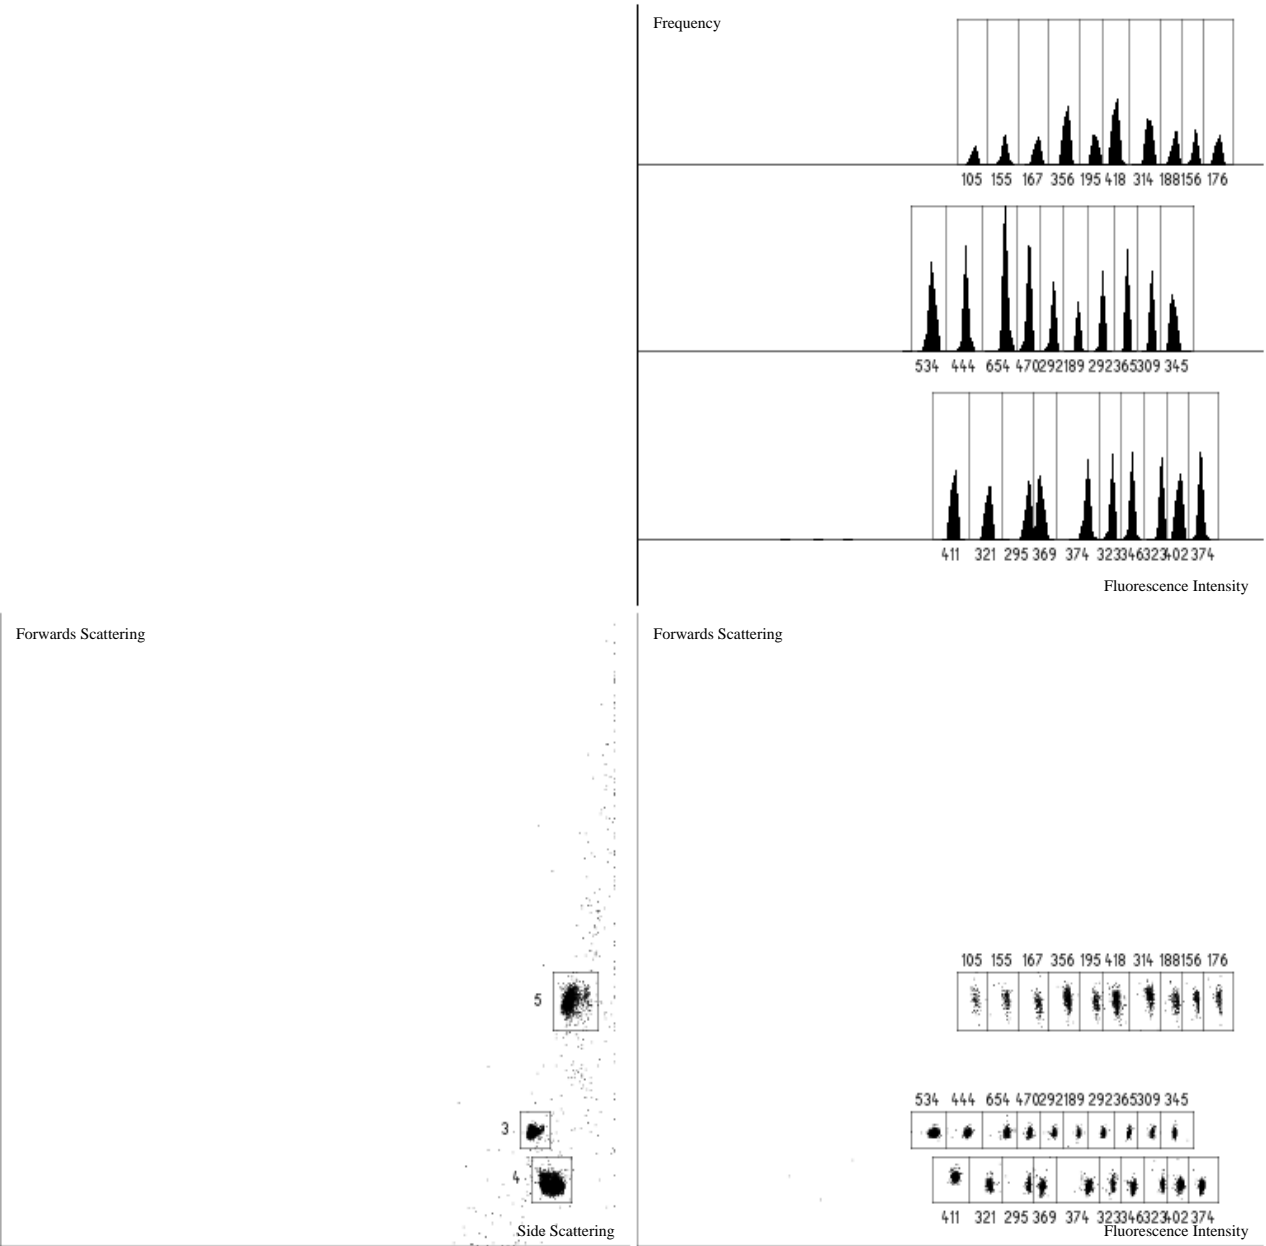



ANNEX 2: TAG REFERENCE SET - TAG DECONVOLUTION SESSION 20

Tag analysis flow cytometry instrument: BD FACSCalibur

Number of gates: 30

Number of beads whose tags were deconvoluted: 51

Number of beads with conclusive tagging data: 40

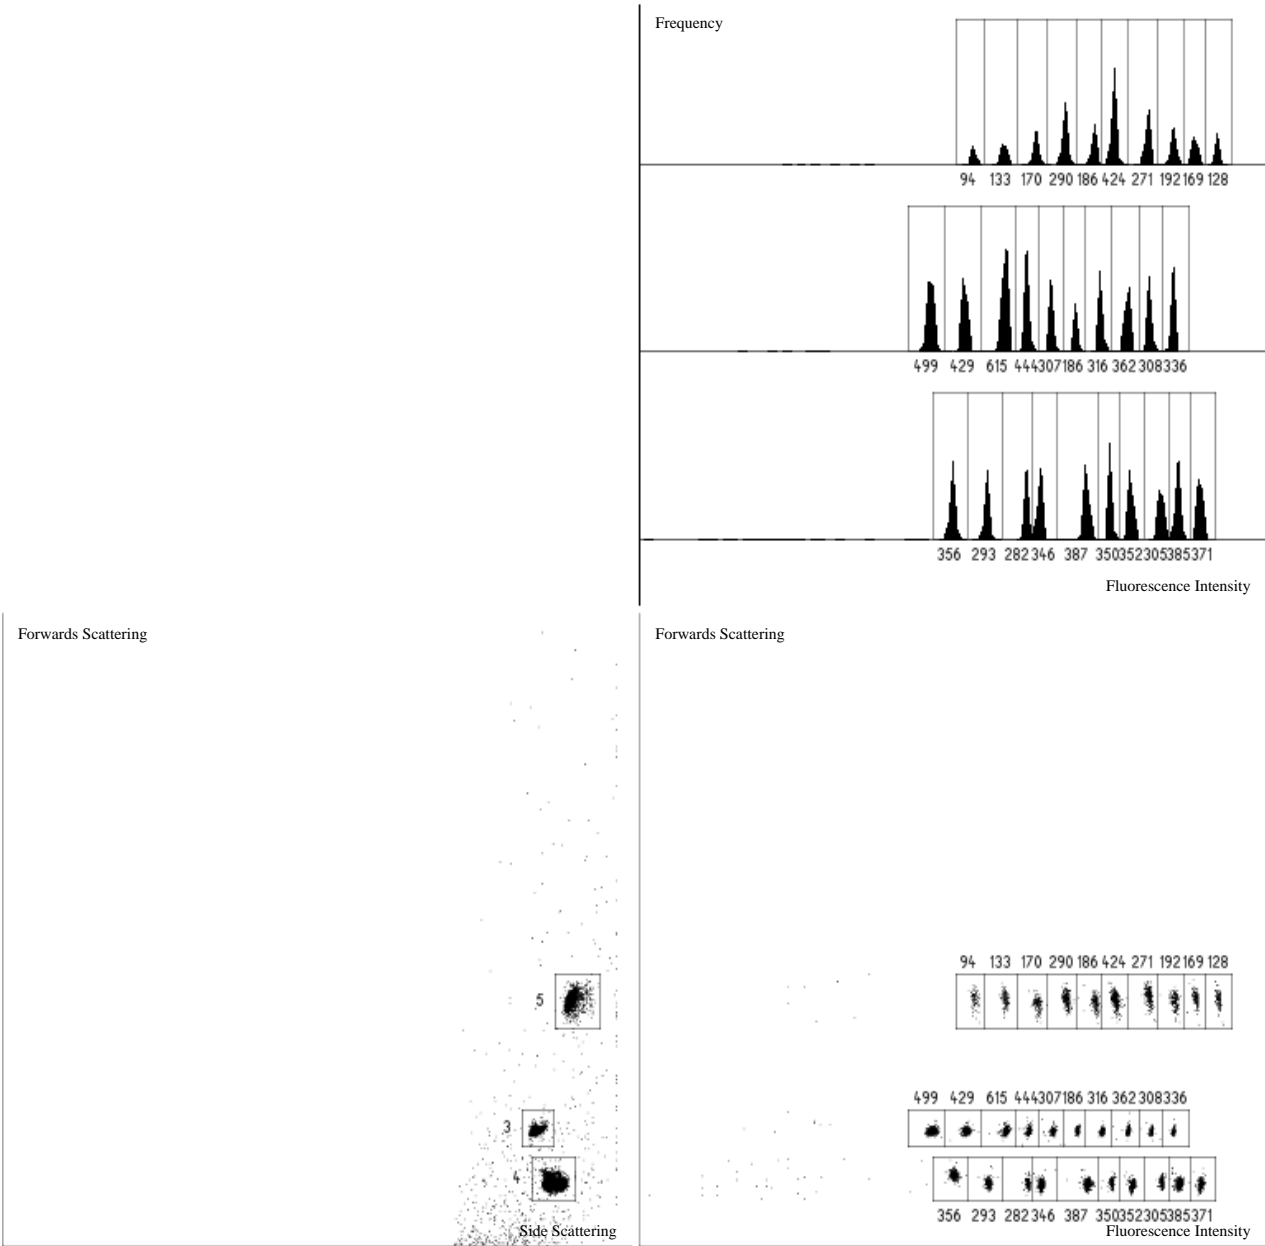

ANNEX 2: TAG REFERENCE SET - TAG DECONVOLUTION SESSION 21

Tag analysis flow cytometry instrument: BD FACSCalibur

Number of gates: 30

Number of beads whose tags were deconvoluted: 20

Number of beads with conclusive tagging data: 13

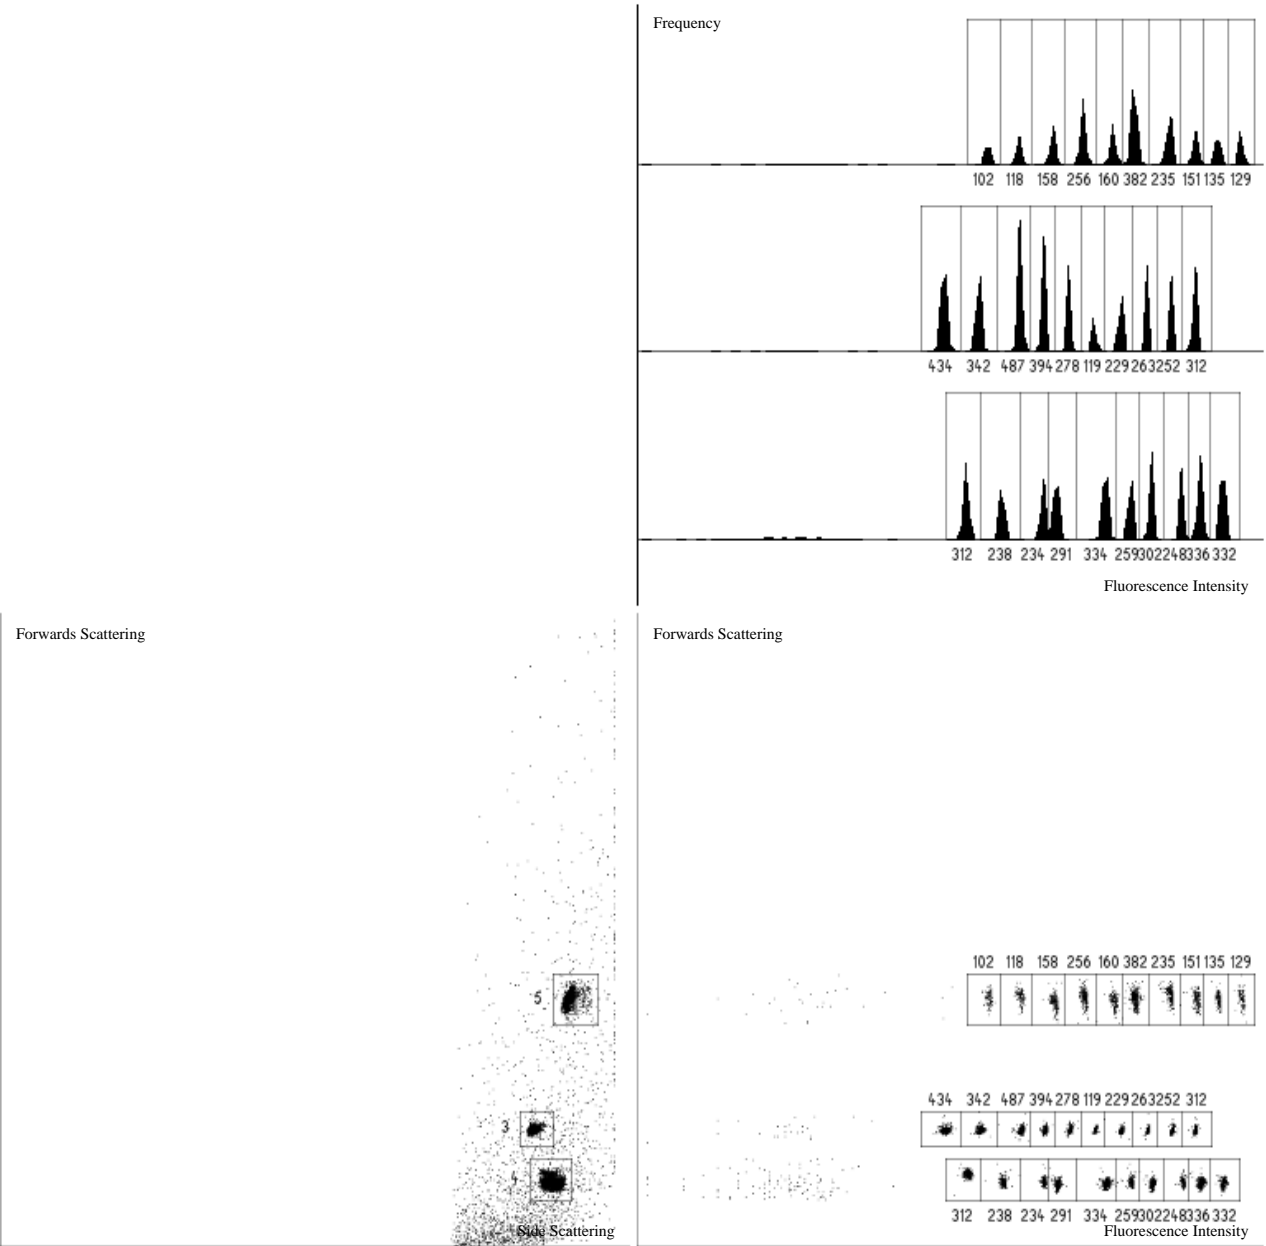

ANNEX 3: TAG DECONVOLUTION - BEAD 1

Passes flow sorting criteria: Yes  
Passes tag deconvolution criteria: Yes  
Included in protocol analysis: Yes  
Protocol: 9, 9, 5, 1  
Filename: Bin1\_plateA0\_H3.fcs  
Split 1: Petrol shading  
Split 2: Green shading  
Split 3: Violet shading

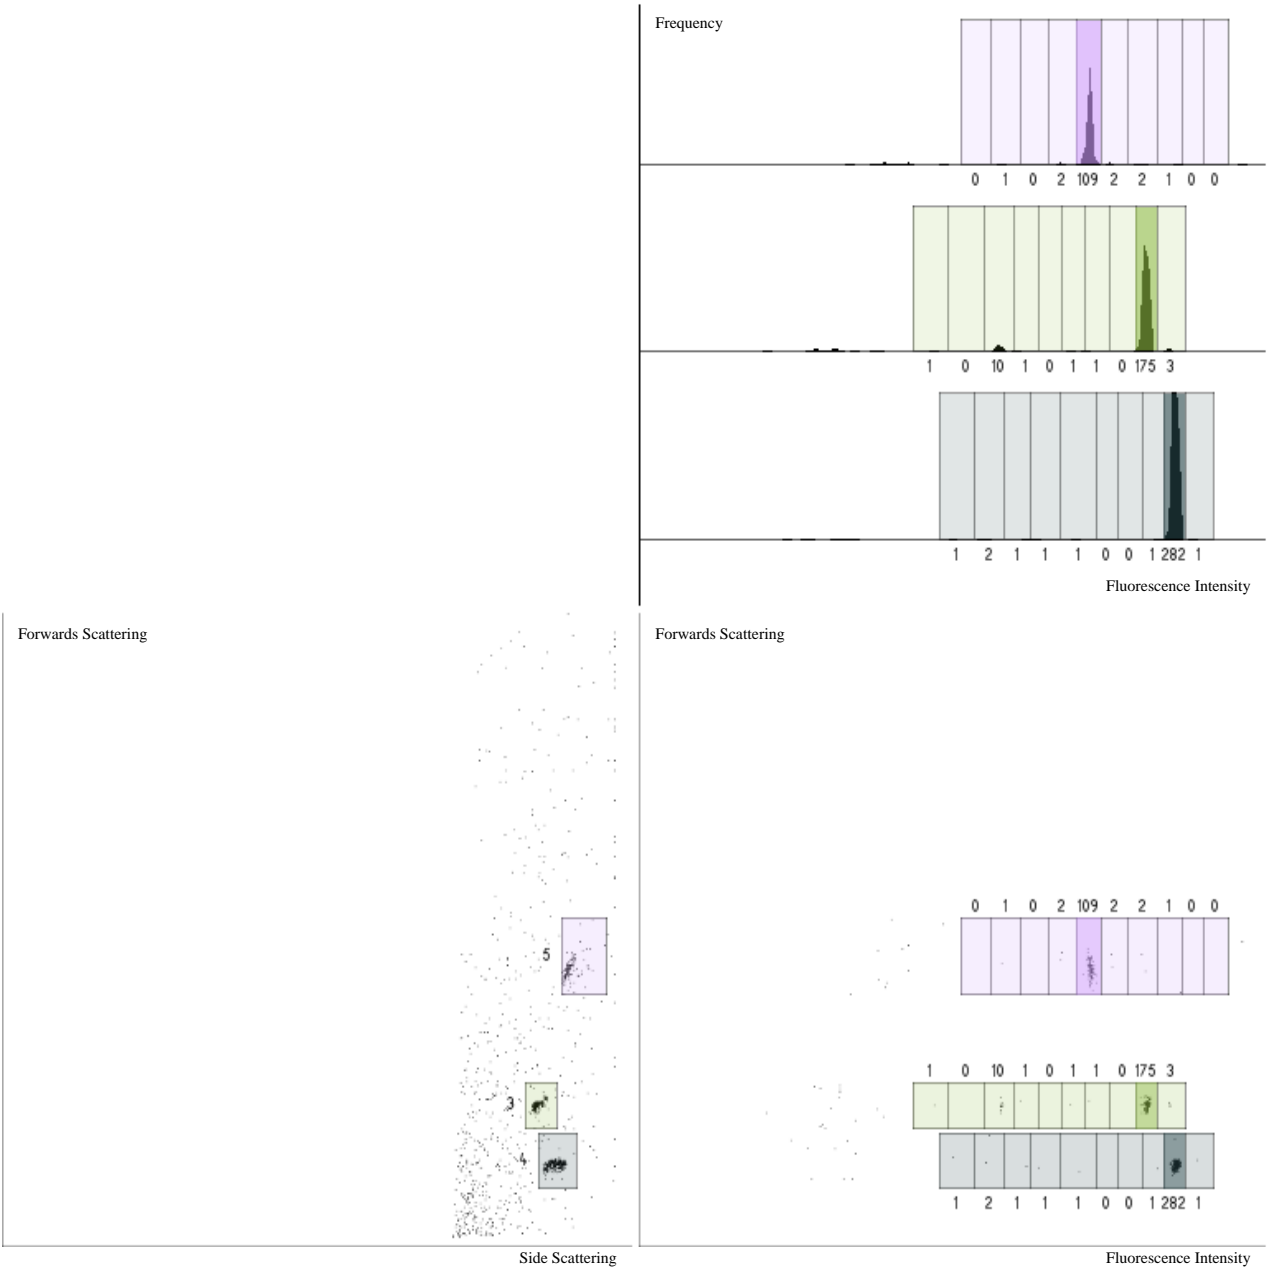

ANNEX 3: TAG DECONVOLUTION - BEAD 2

Passes flow sorting criteria: Yes  
Passes tag deconvolution criteria: No  
Included in protocol analysis: No  
Protocol: N/A  
Filename: Bin1\_plateA0\_A2.fcs  
Split 1: Petrol shading  
Split 2: Green shading  
Split 3: Violet shading

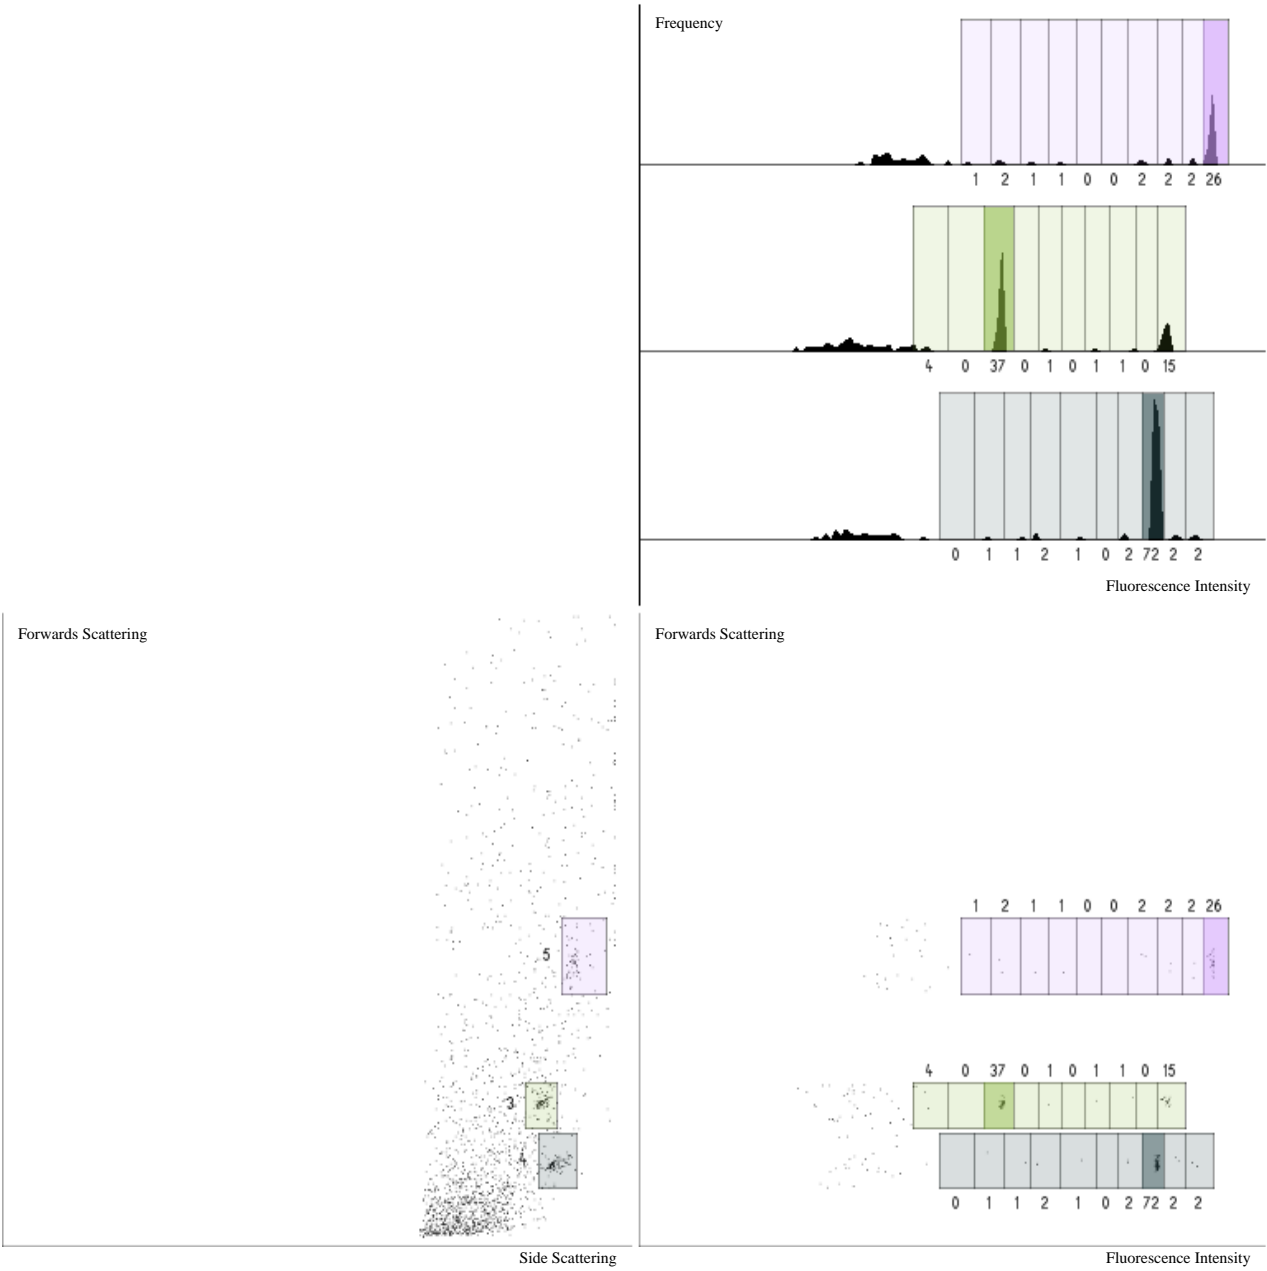

ANNEX 3: TAG DECONVOLUTION - BEAD 3

Passes flow sorting criteria: Yes  
Passes tag deconvolution criteria: No  
Included in protocol analysis: No  
Protocol: N/A  
Filename: Bin1\_plateA0\_A3.fcs  
Split 1: Petrol shading  
Split 2: Green shading  
Split 3: Violet shading

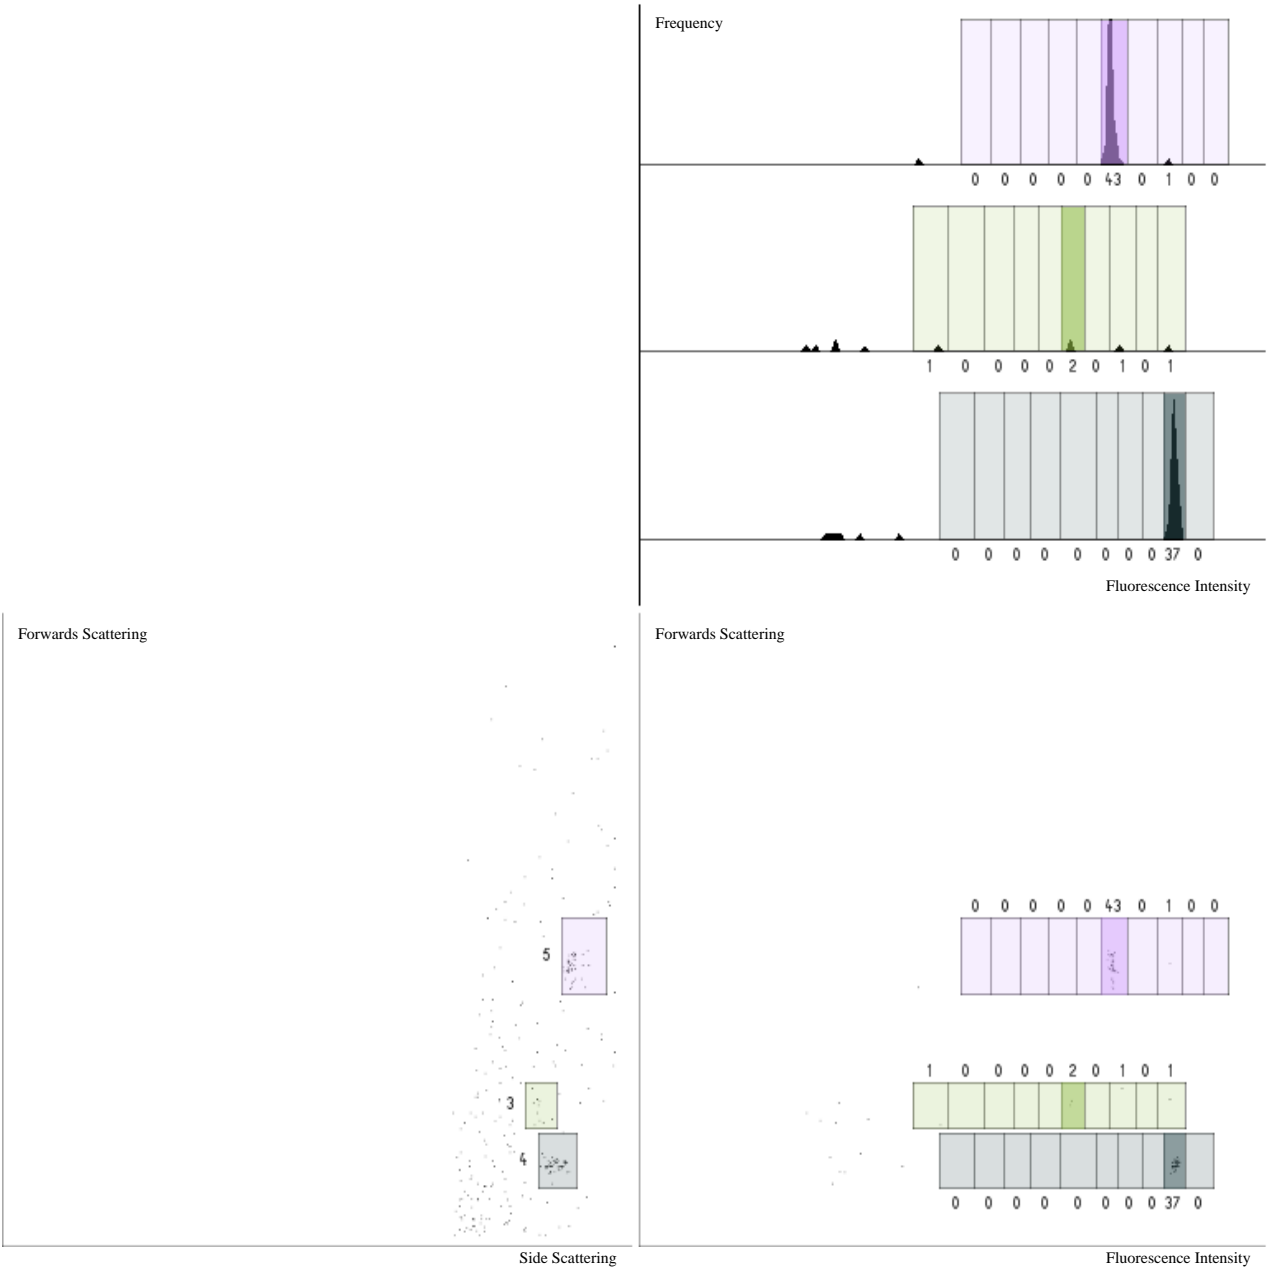

Passes flow sorting criteria: Yes  
 Passes tag deconvolution criteria: Yes  
 Included in protocol analysis: Yes  
 Protocol: 4, 9, 9, 1  
 Filename: Bin1\_plateA0\_B1.fcs  
 Split 1: Petrol shading  
 Split 2: Green shading  
 Split 3: Violet shading

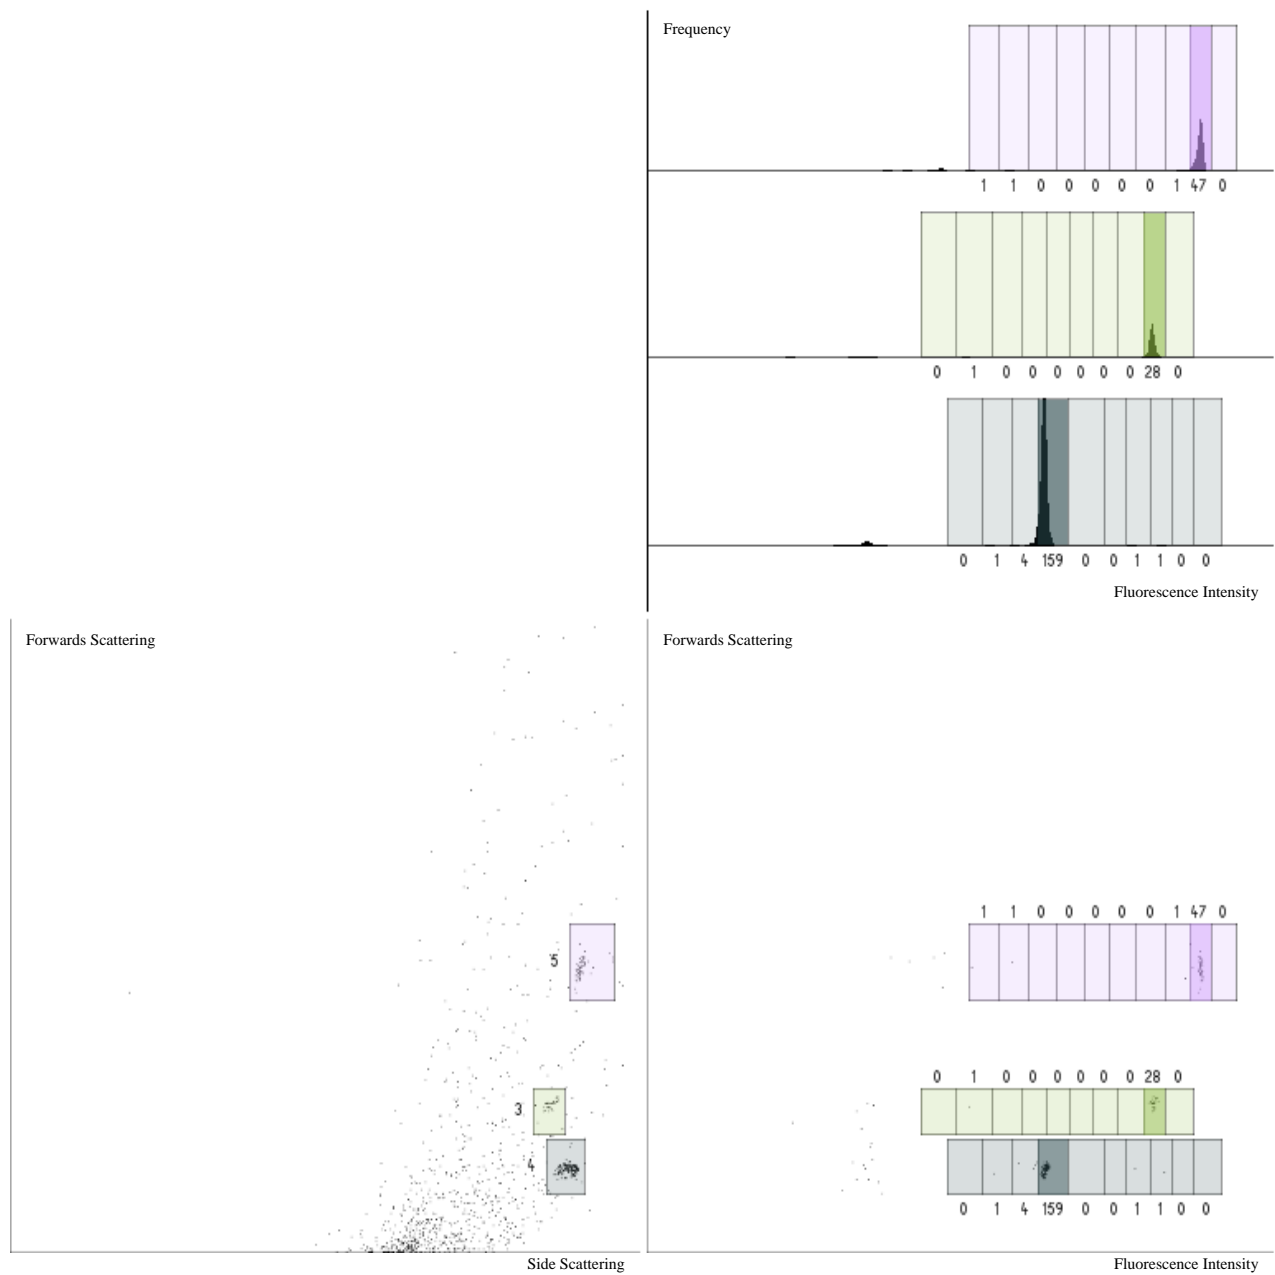

ANNEX 3: TAG DECONVOLUTION - BEAD 5

Passes flow sorting criteria: Yes  
Passes tag deconvolution criteria: Yes  
Included in protocol analysis: Yes  
Protocol: 7, 6, 7, 1  
Filename: Bin1\_plateA0\_B2.fcs  
Split 1: Petrol shading  
Split 2: Green shading  
Split 3: Violet shading

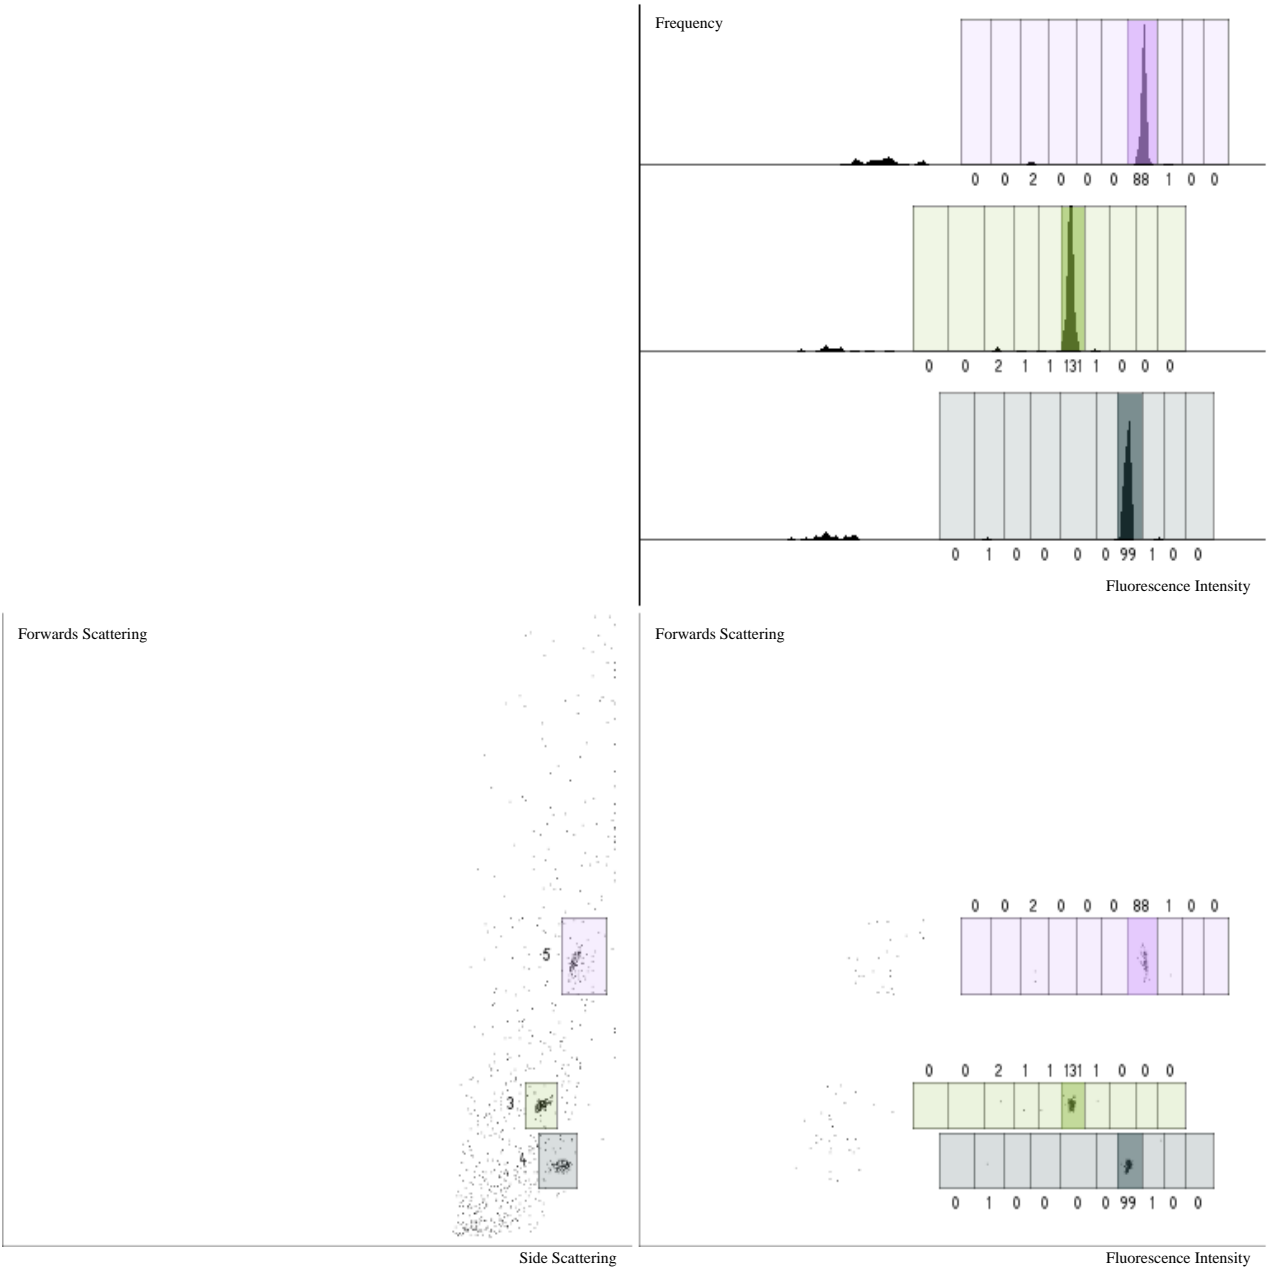

ANNEX 3: TAG DECONVOLUTION - BEAD 6

Passes flow sorting criteria: Yes  
Passes tag deconvolution criteria: Yes  
Included in protocol analysis: Yes  
Protocol: 10, 4, 4, 1  
Filename: Bin1\_plateA0\_B3.fcs  
Split 1: Petrol shading  
Split 2: Green shading  
Split 3: Violet shading

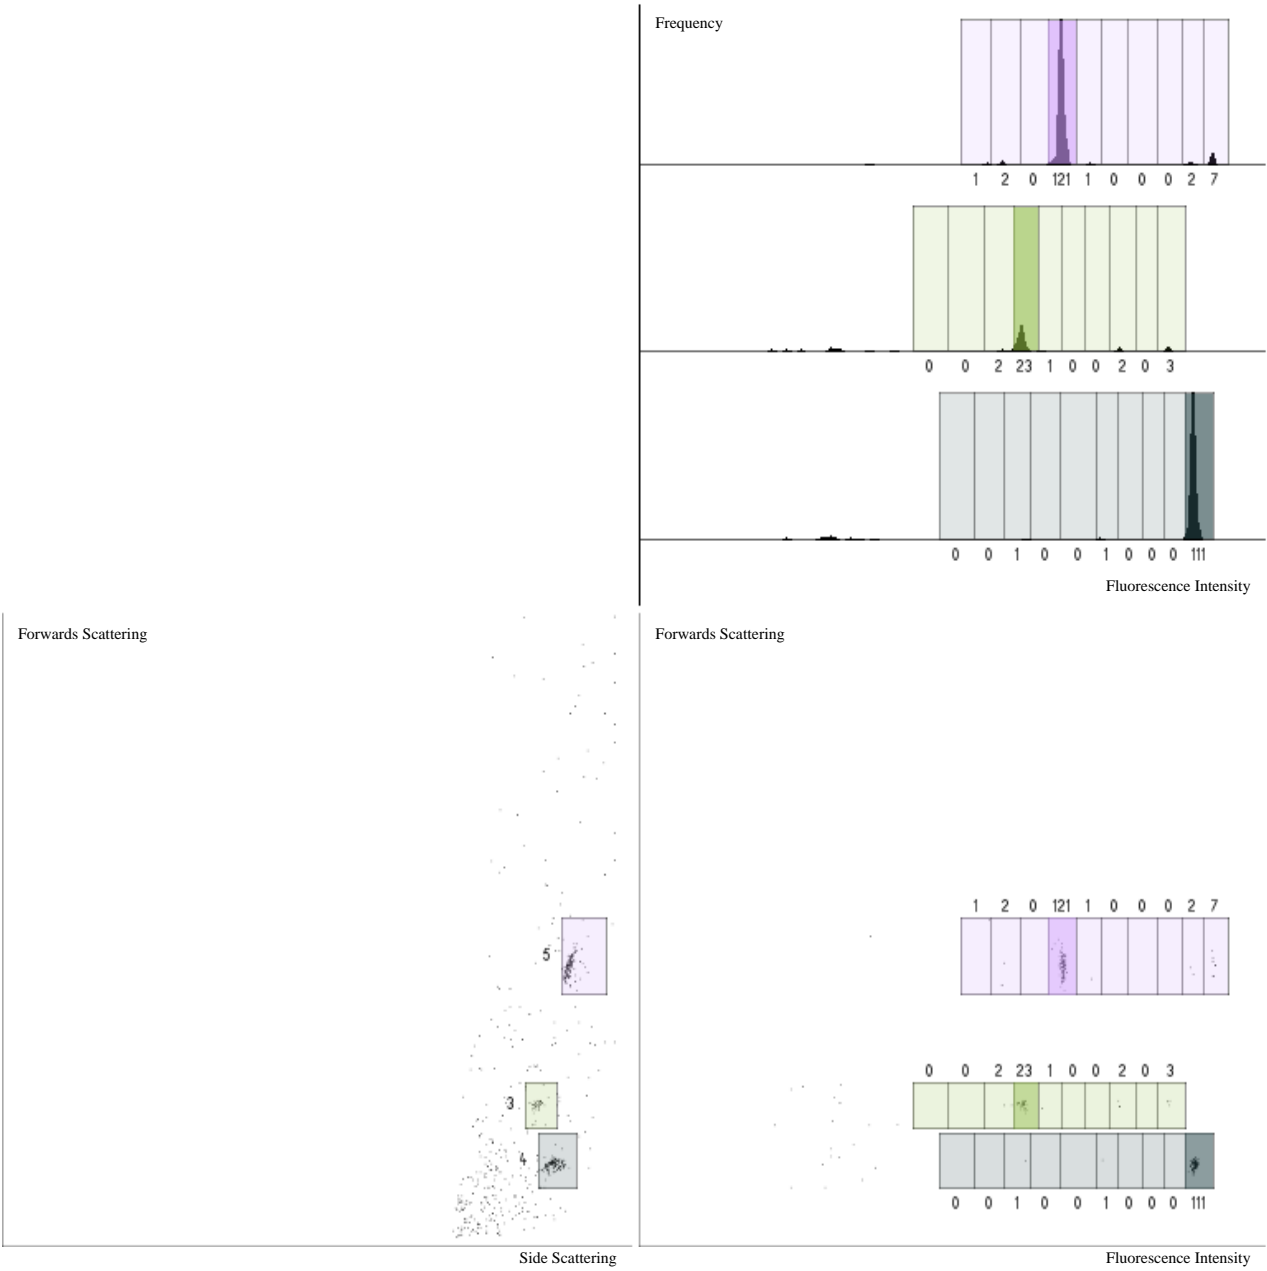



ANNEX 3: TAG DECONVOLUTION - BEAD 7

Passes flow sorting criteria: Yes  
Passes tag deconvolution criteria: Yes  
Included in protocol analysis: Yes  
Protocol: 7, 10, 2, 1  
Filename: Bin1\_plateA0\_C1.fcs  
Split 1: Petrol shading  
Split 2: Green shading  
Split 3: Violet shading

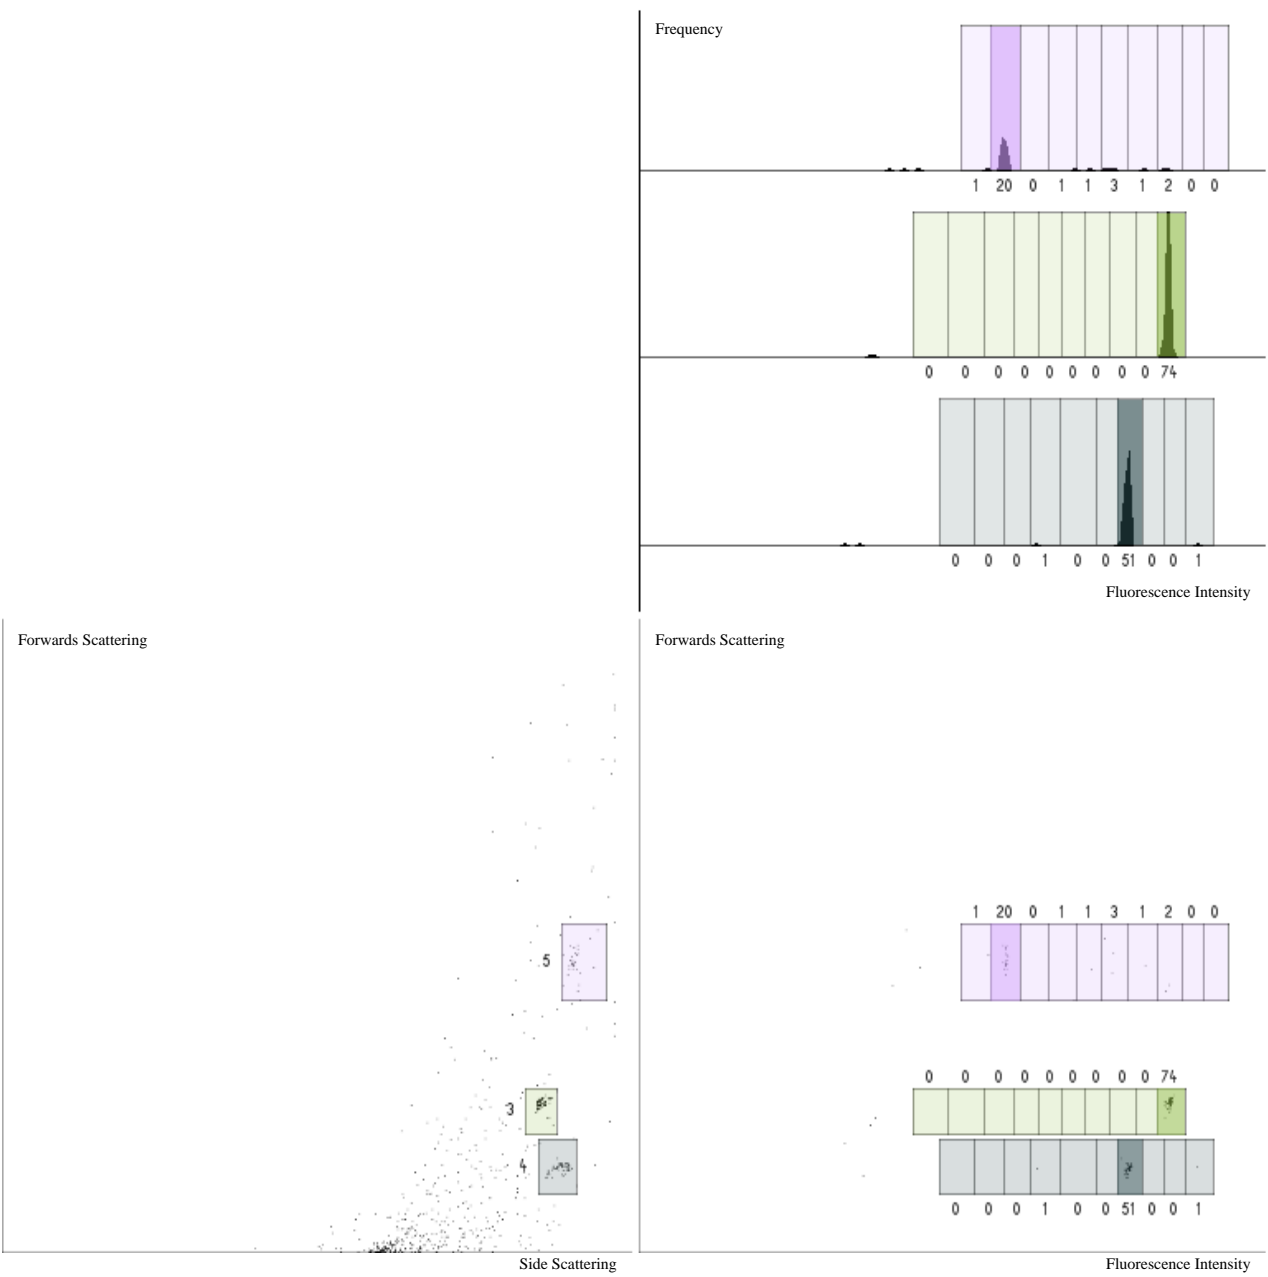

ANNEX 3: TAG DECONVOLUTION - BEAD 8

Passes flow sorting criteria: Yes  
Passes tag deconvolution criteria: Yes  
Included in protocol analysis: Yes  
Protocol: 6, 8, 1, 1  
Filename: Bin1\_plateA0\_C2.fcs  
Split 1: Petrol shading  
Split 2: Green shading  
Split 3: Violet shading

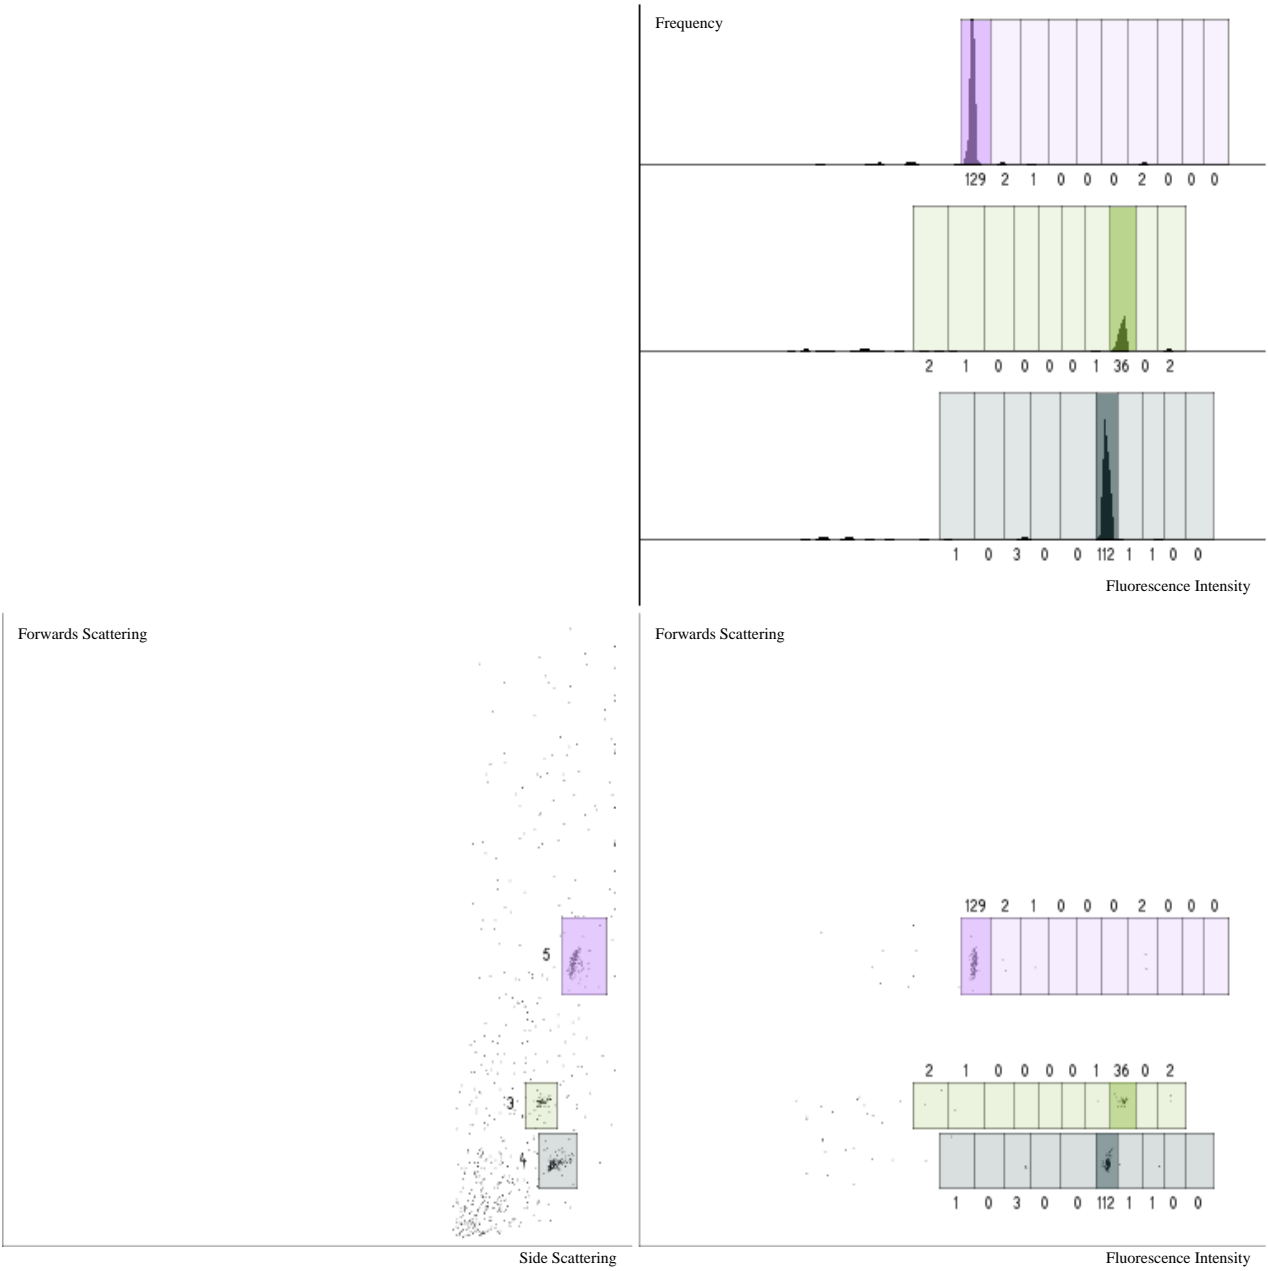

ANNEX 3: TAG DECONVOLUTION - BEAD 9

Passes flow sorting criteria: Yes  
Passes tag deconvolution criteria: Yes  
Included in protocol analysis: Yes  
Protocol: 3, 6, 3, 1  
Filename: Bin1\_plateA0\_C3.fcs  
Split 1: Petrol shading  
Split 2: Green shading  
Split 3: Violet shading

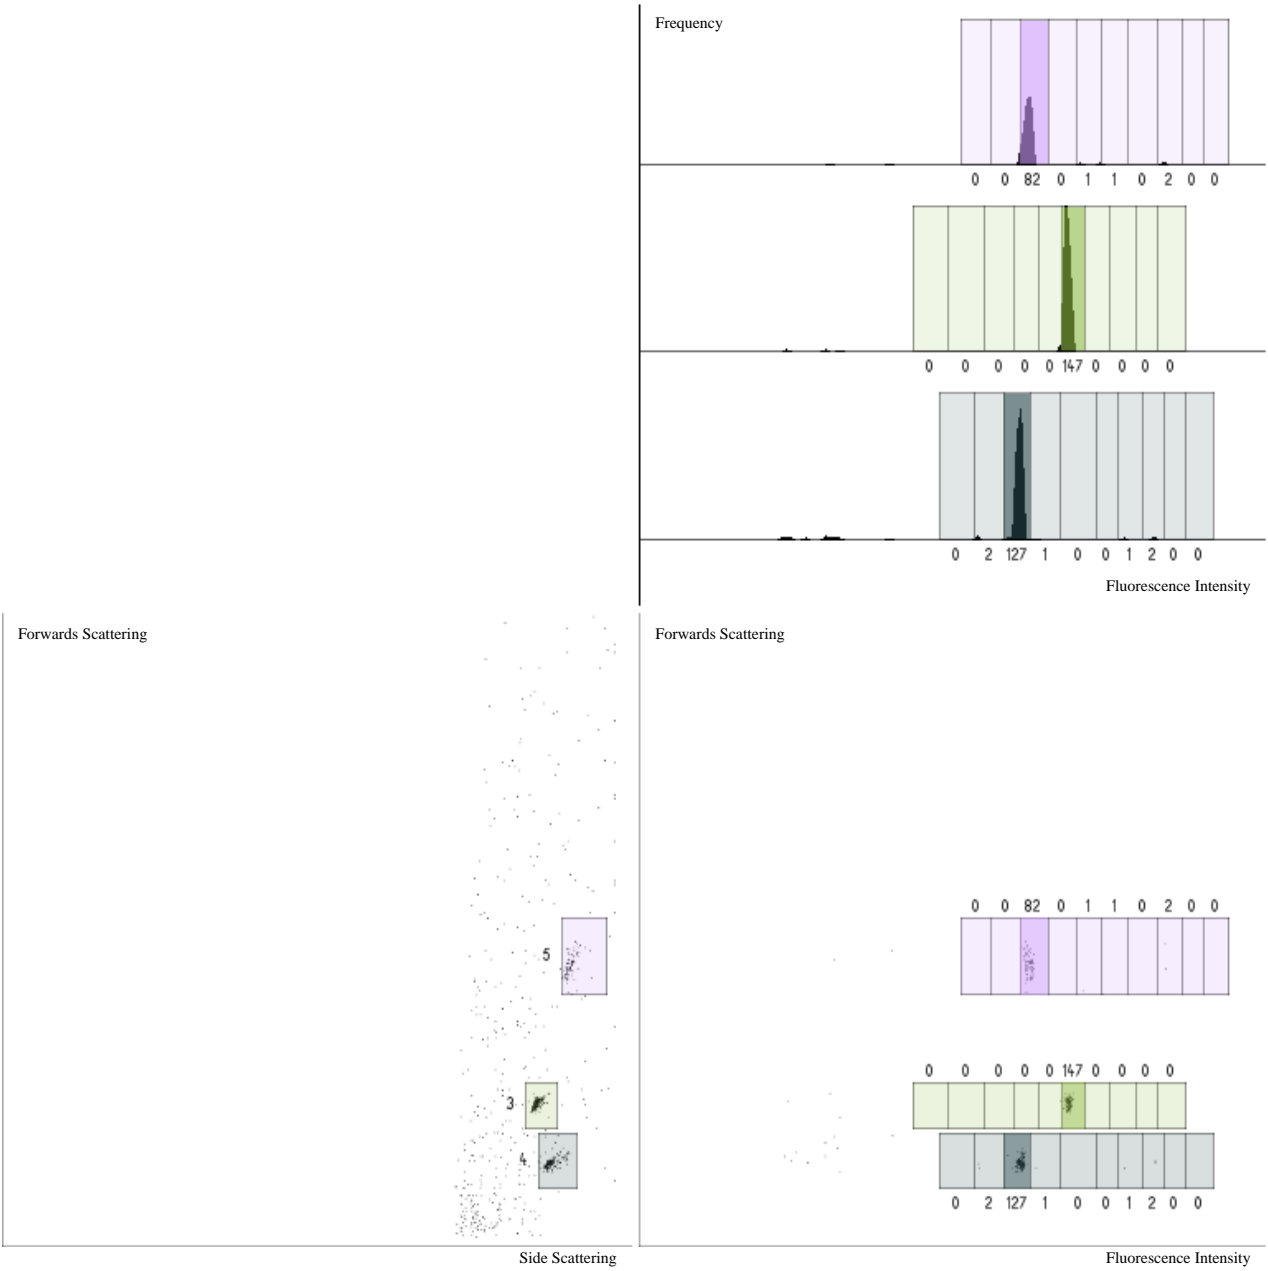

ANNEX 3: TAG DECONVOLUTION - BEAD 10

Passes flow sorting criteria: Yes  
Passes tag deconvolution criteria: Yes  
Included in protocol analysis: Yes  
Protocol: 8, 2, 2, 1  
Filename: Bin1\_plateA0\_D1.fcs  
Split 1: Petrol shading  
Split 2: Green shading  
Split 3: Violet shading

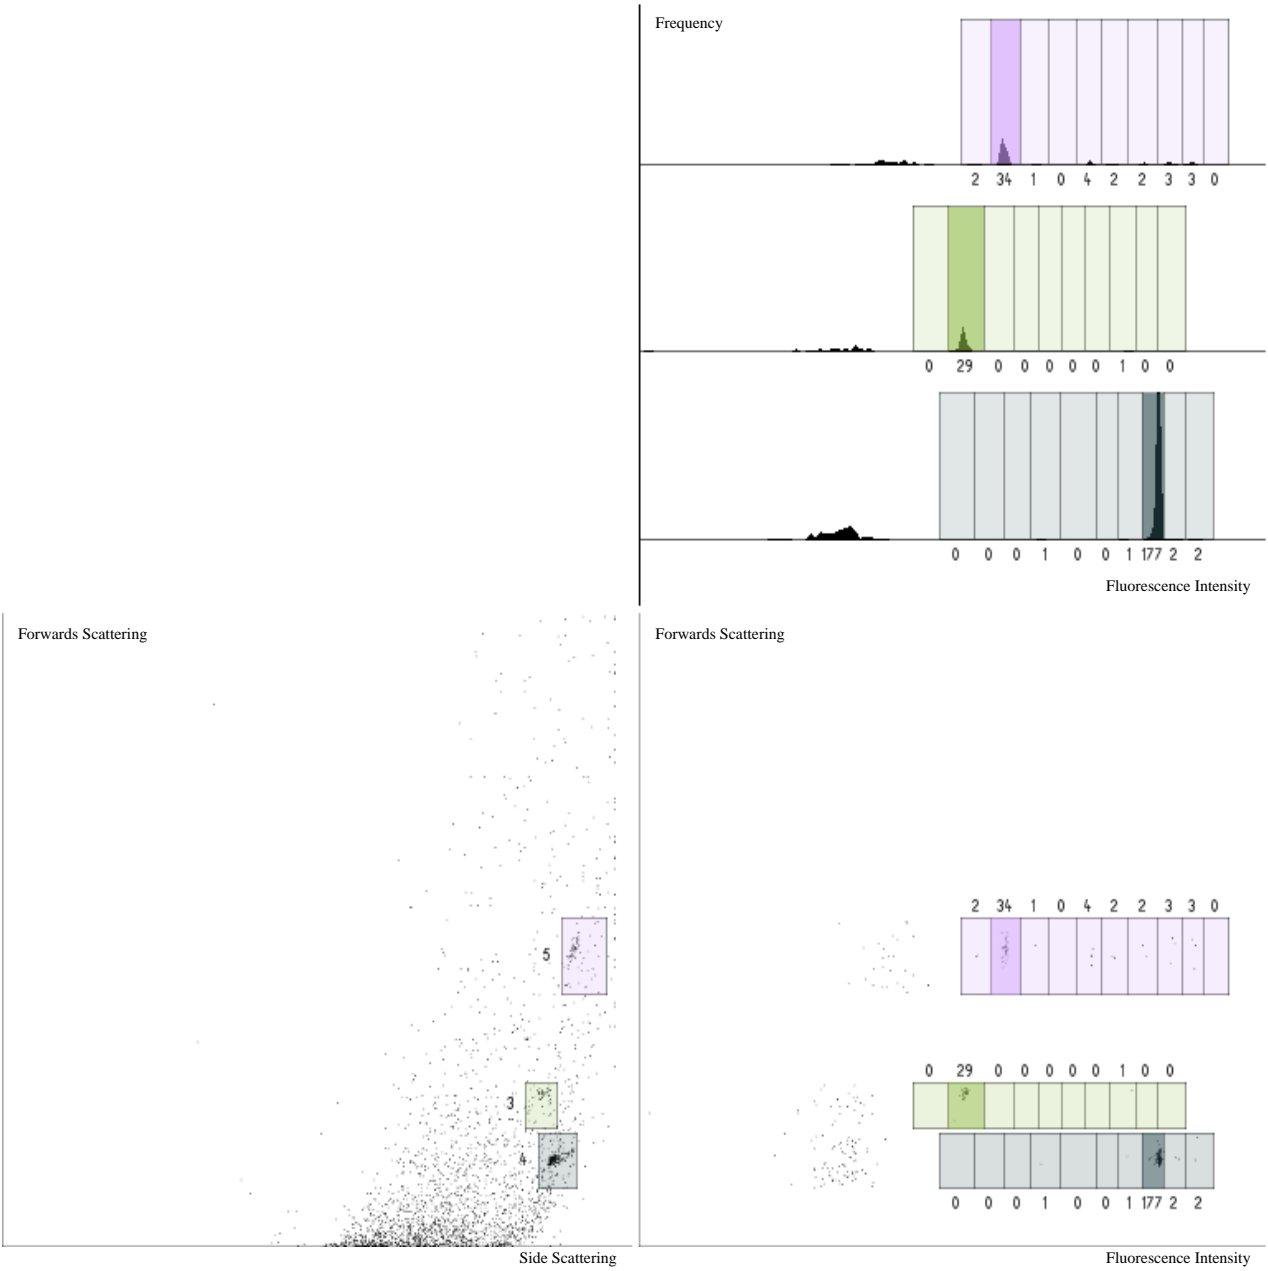

ANNEX 3: TAG DECONVOLUTION - BEAD 11

Passes flow sorting criteria: Yes  
Passes tag deconvolution criteria: No  
Included in protocol analysis: No  
Protocol: N/A  
Filename: Bin1\_plateA0\_D2.fcs  
Split 1: Petrol shading  
Split 2: Green shading  
Split 3: Violet shading

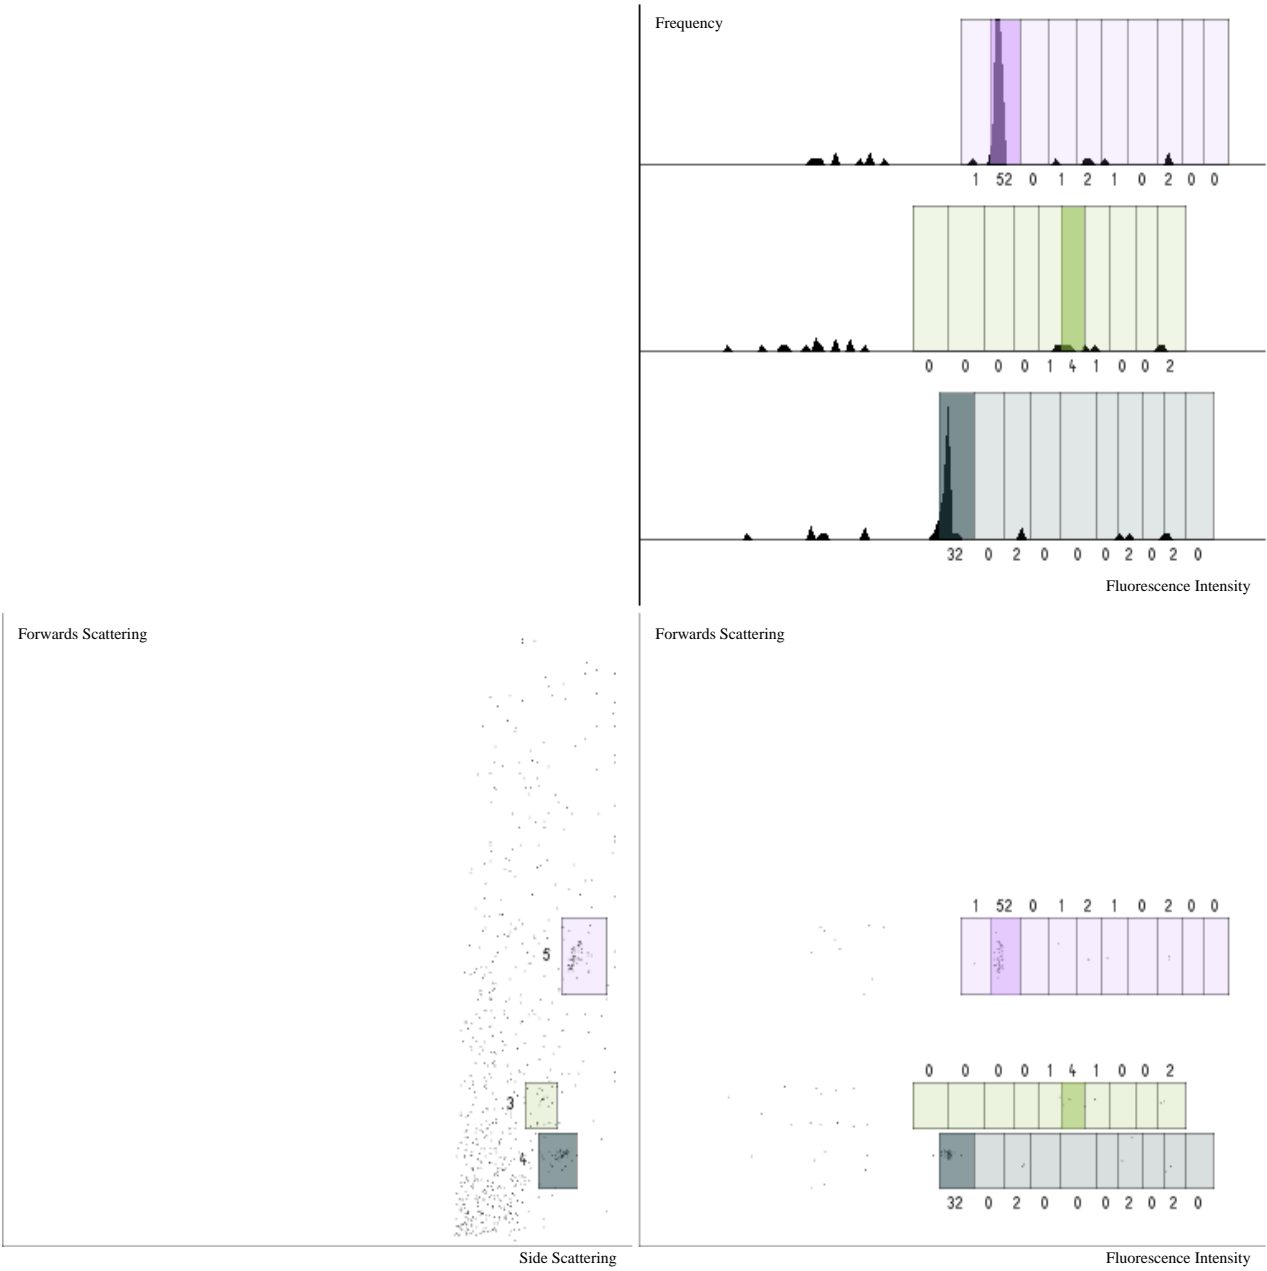

ANNEX 3: TAG DECONVOLUTION - BEAD 12

Passes flow sorting criteria: Yes  
Passes tag deconvolution criteria: Yes  
Included in protocol analysis: Yes  
Protocol: 2, 5, 4, 1  
Filename: Bin1\_plateA0\_D3.fcs  
Split 1: Petrol shading  
Split 2: Green shading  
Split 3: Violet shading

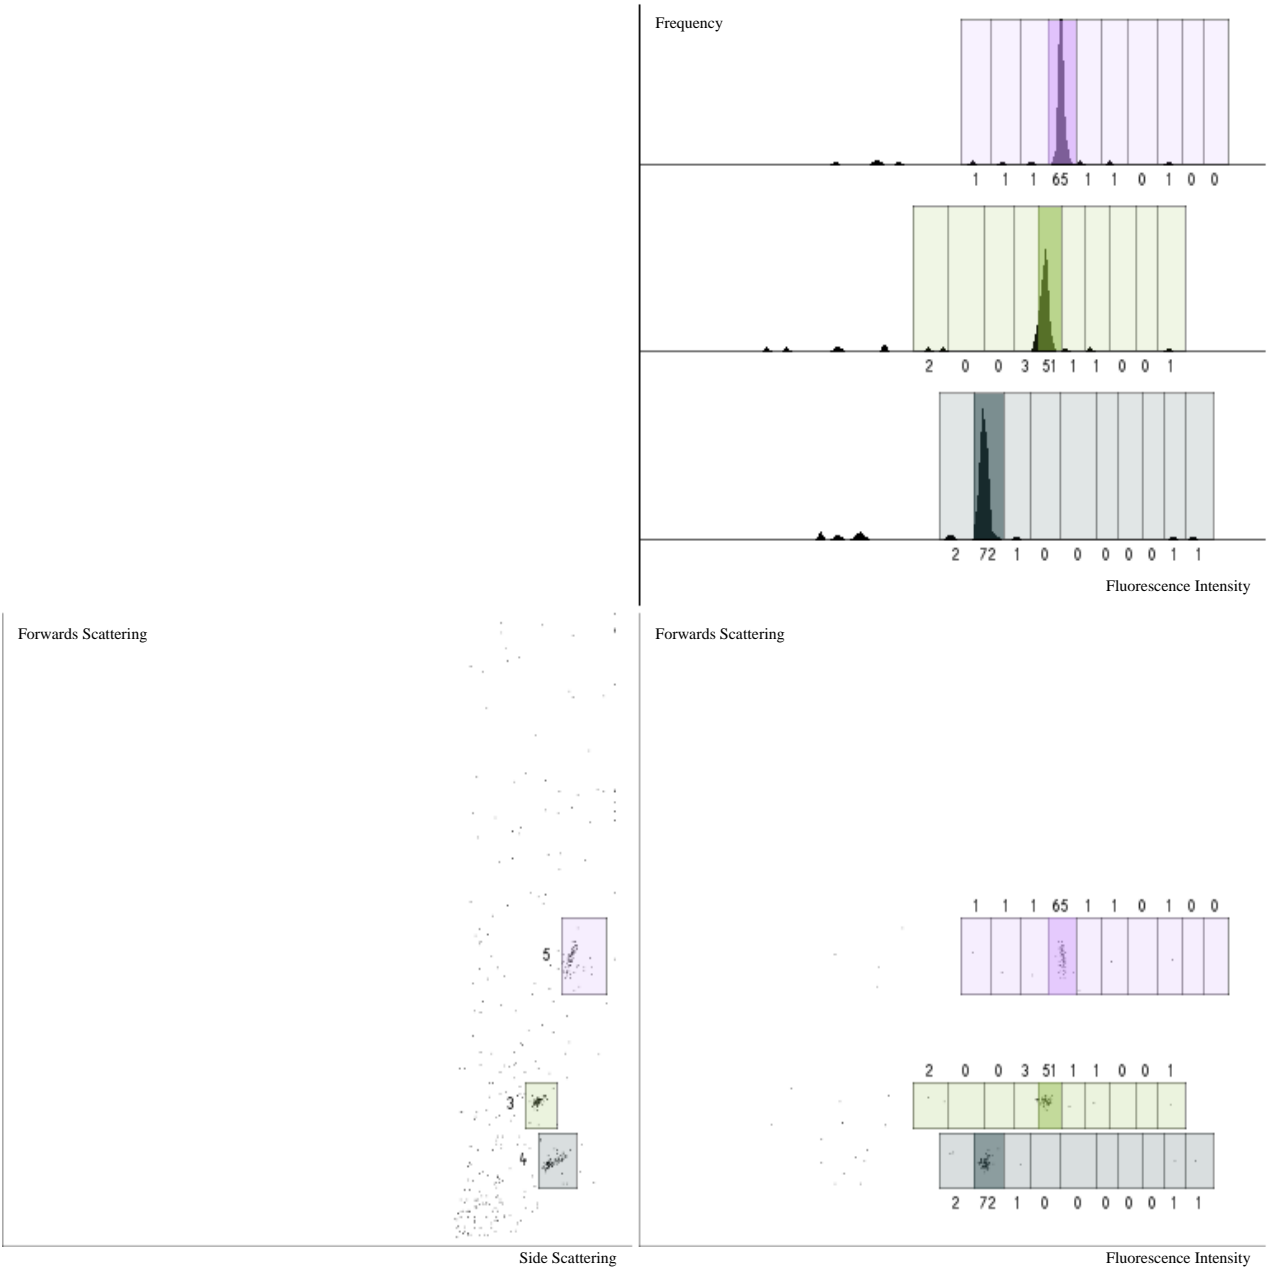

ANNEX 3: TAG DECONVOLUTION - BEAD 13

Passes flow sorting criteria: Yes  
Passes tag deconvolution criteria: Yes  
Included in protocol analysis: Yes  
Protocol: 10, 8, 2, 1  
Filename: Bin1\_plateA0\_E1.fcs  
Split 1: Petrol shading  
Split 2: Green shading  
Split 3: Violet shading

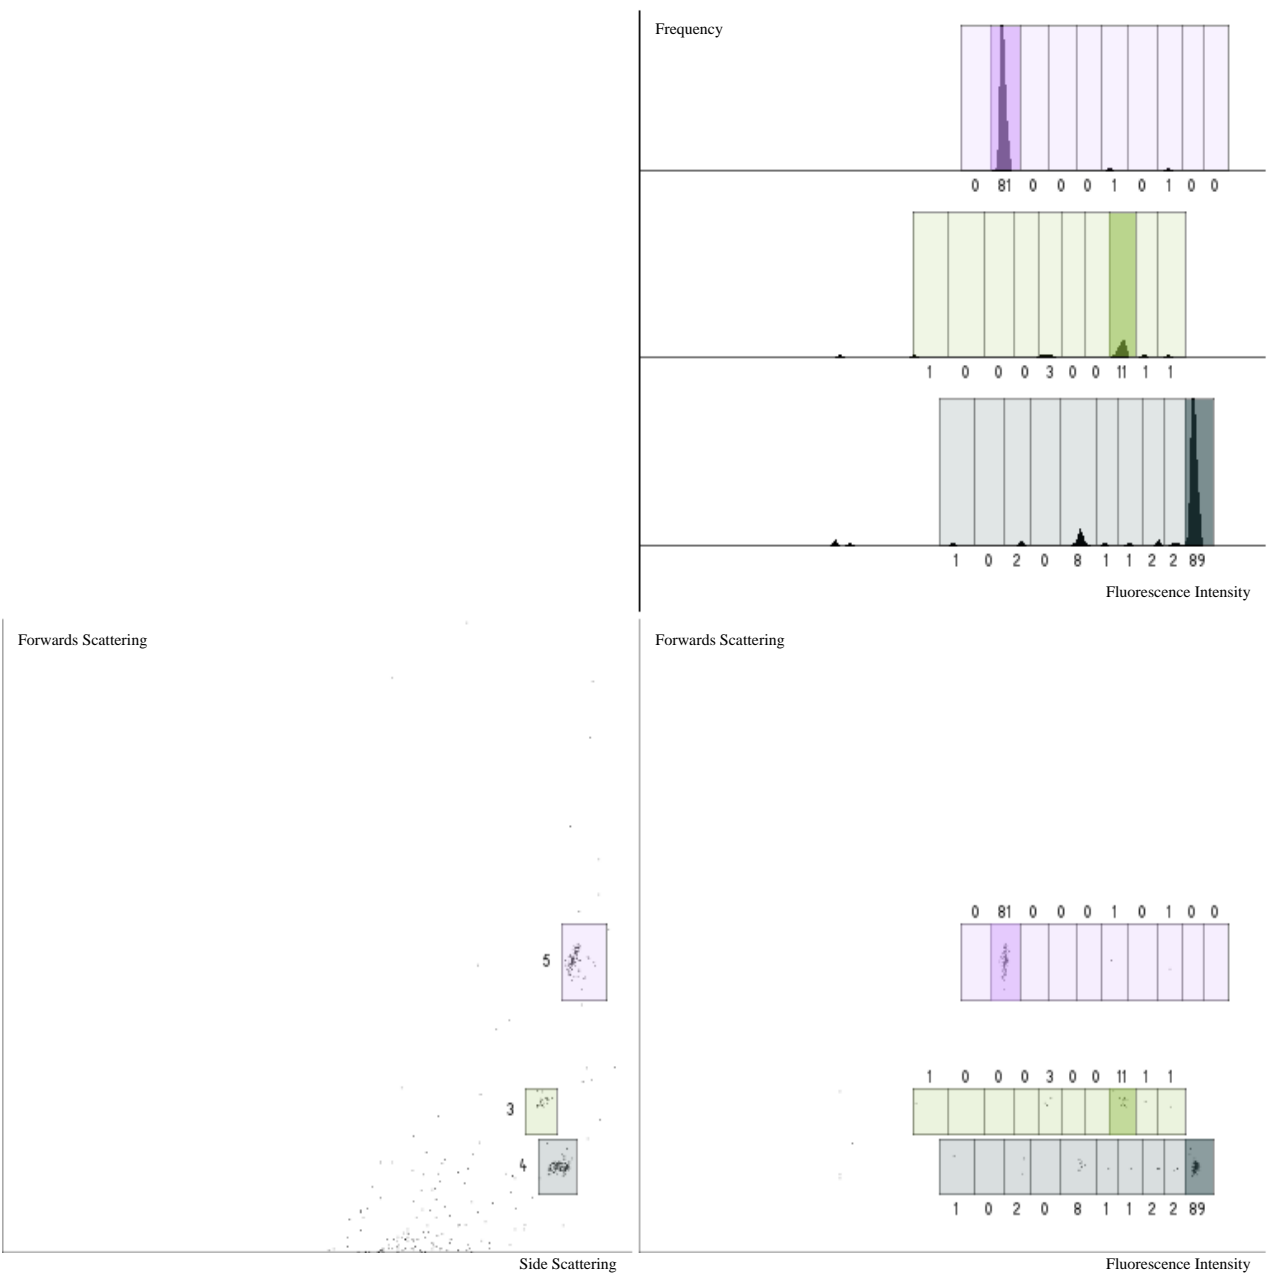

ANNEX 3: TAG DECONVOLUTION - BEAD 14

Passes flow sorting criteria: Yes  
Passes tag deconvolution criteria: Yes  
Included in protocol analysis: Yes  
Protocol: 3, 7, 3, 1  
Filename: Bin1\_plateA0\_E2.fcs  
Split 1: Petrol shading  
Split 2: Green shading  
Split 3: Violet shading

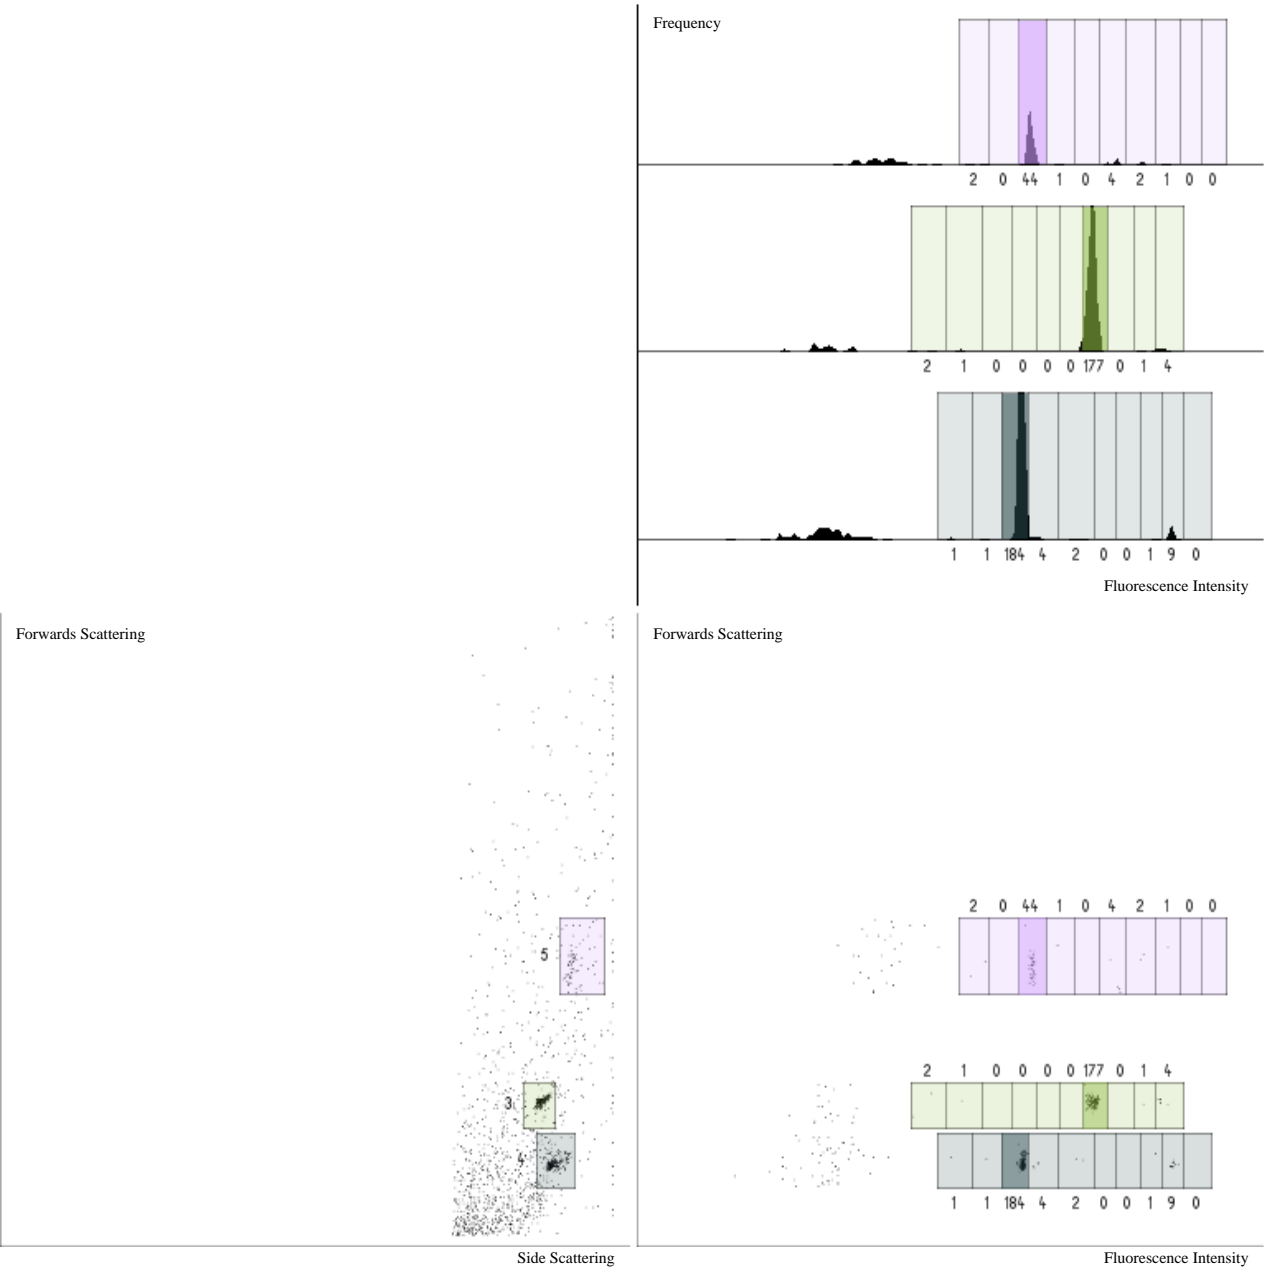



ANNEX 3: TAG DECONVOLUTION - BEAD 15

Passes flow sorting criteria: Yes  
Passes tag deconvolution criteria: No  
Included in protocol analysis: No  
Protocol: N/A  
Filename: Bin1\_plateA0\_E3.fcs  
Split 1: Petrol shading  
Split 2: Green shading  
Split 3: Violet shading

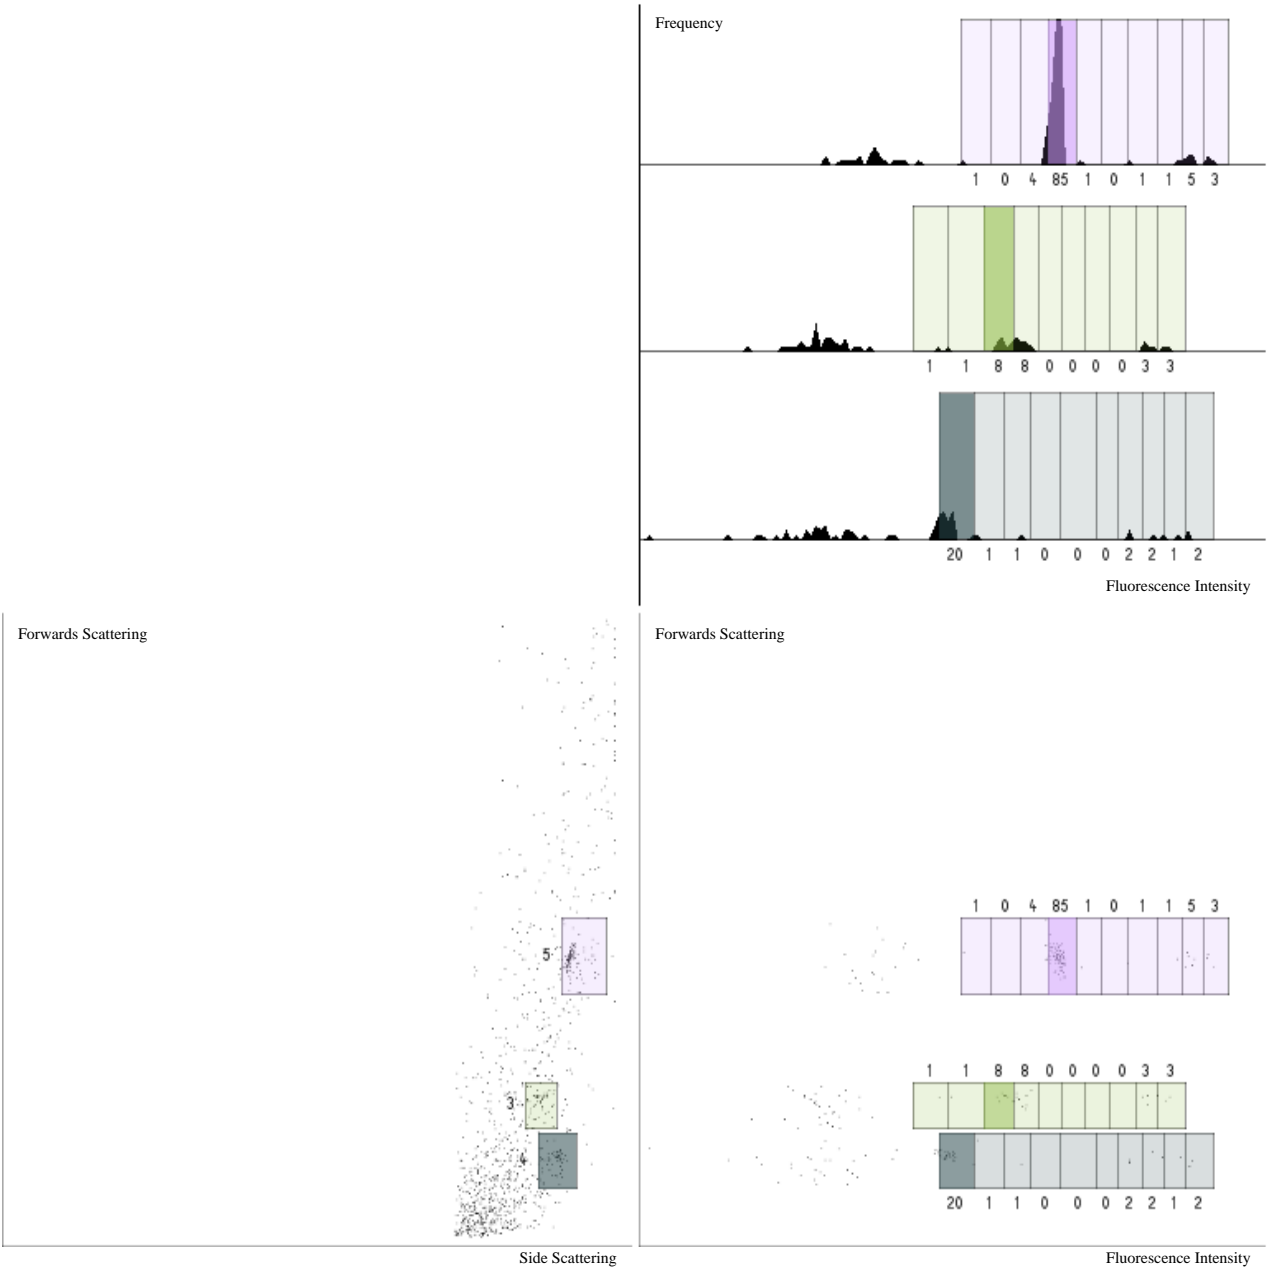

Passes flow sorting criteria: Yes  
 Passes tag deconvolution criteria: No  
 Included in protocol analysis: No  
 Protocol: N/A  
 Filename: Bin1\_plateA0\_F1.fcs  
 Split 1: Petrol shading  
 Split 2: Green shading  
 Split 3: Violet shading

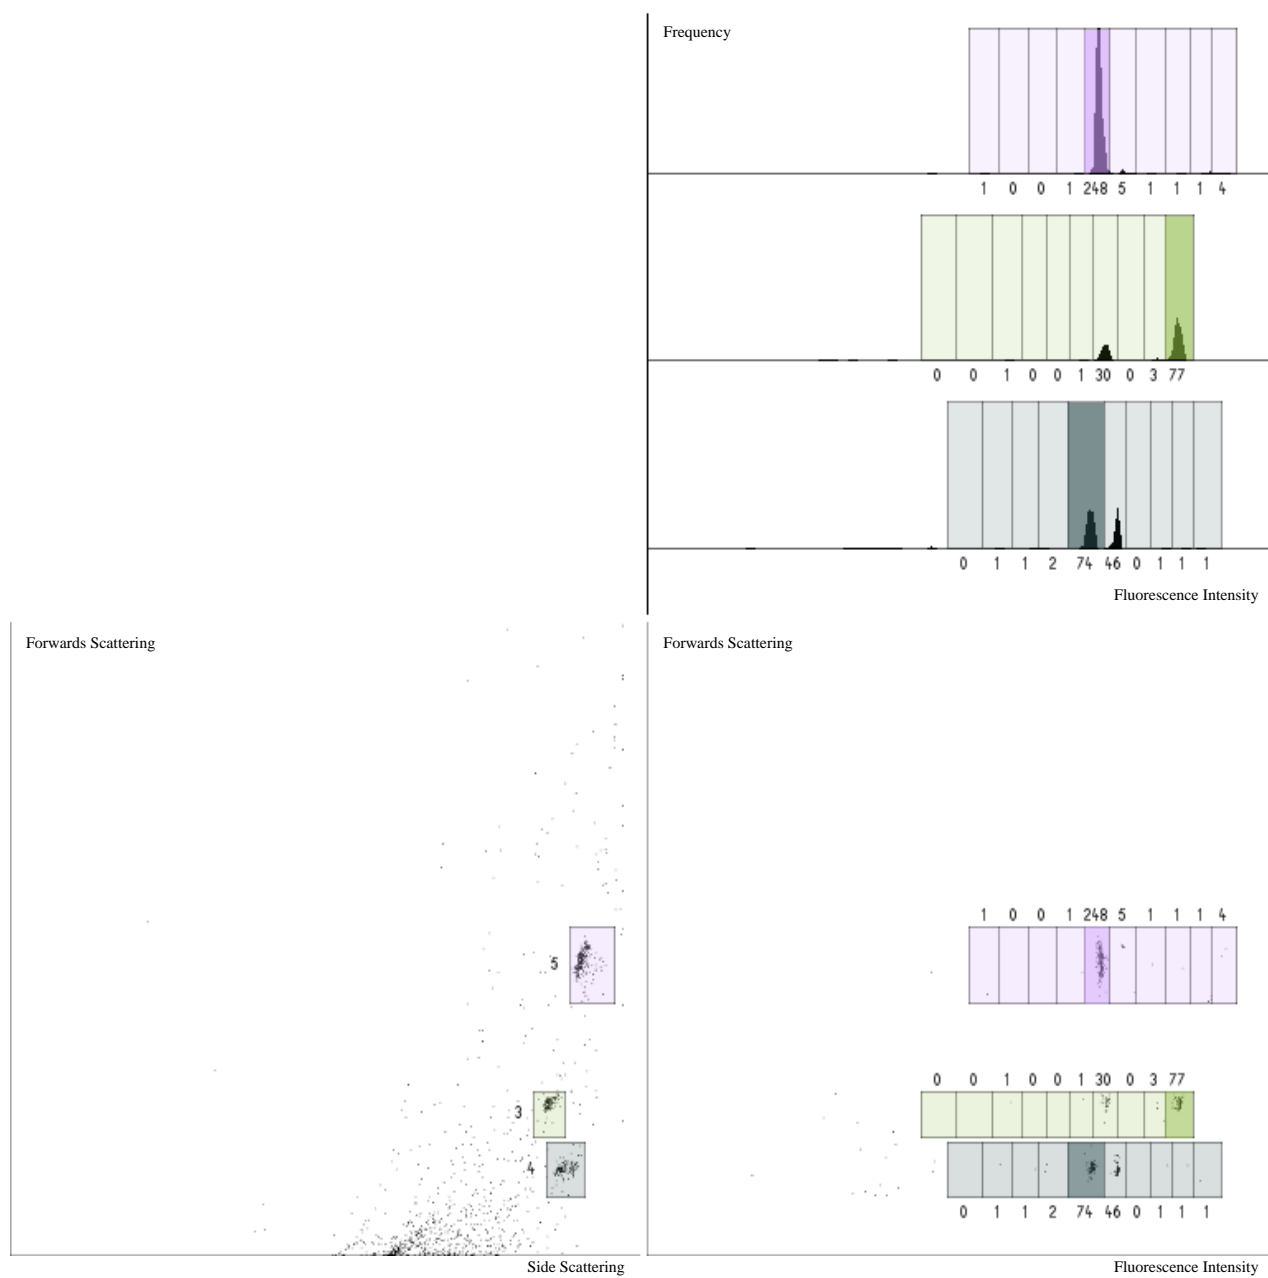

ANNEX 3: TAG DECONVOLUTION - BEAD 17

Passes flow sorting criteria: Yes  
Passes tag deconvolution criteria: Yes  
Included in protocol analysis: Yes  
Protocol: 10, 10, 5, 1  
Filename: Bin1\_plateA0\_F2.fcs  
Split 1: Petrol shading  
Split 2: Green shading  
Split 3: Violet shading

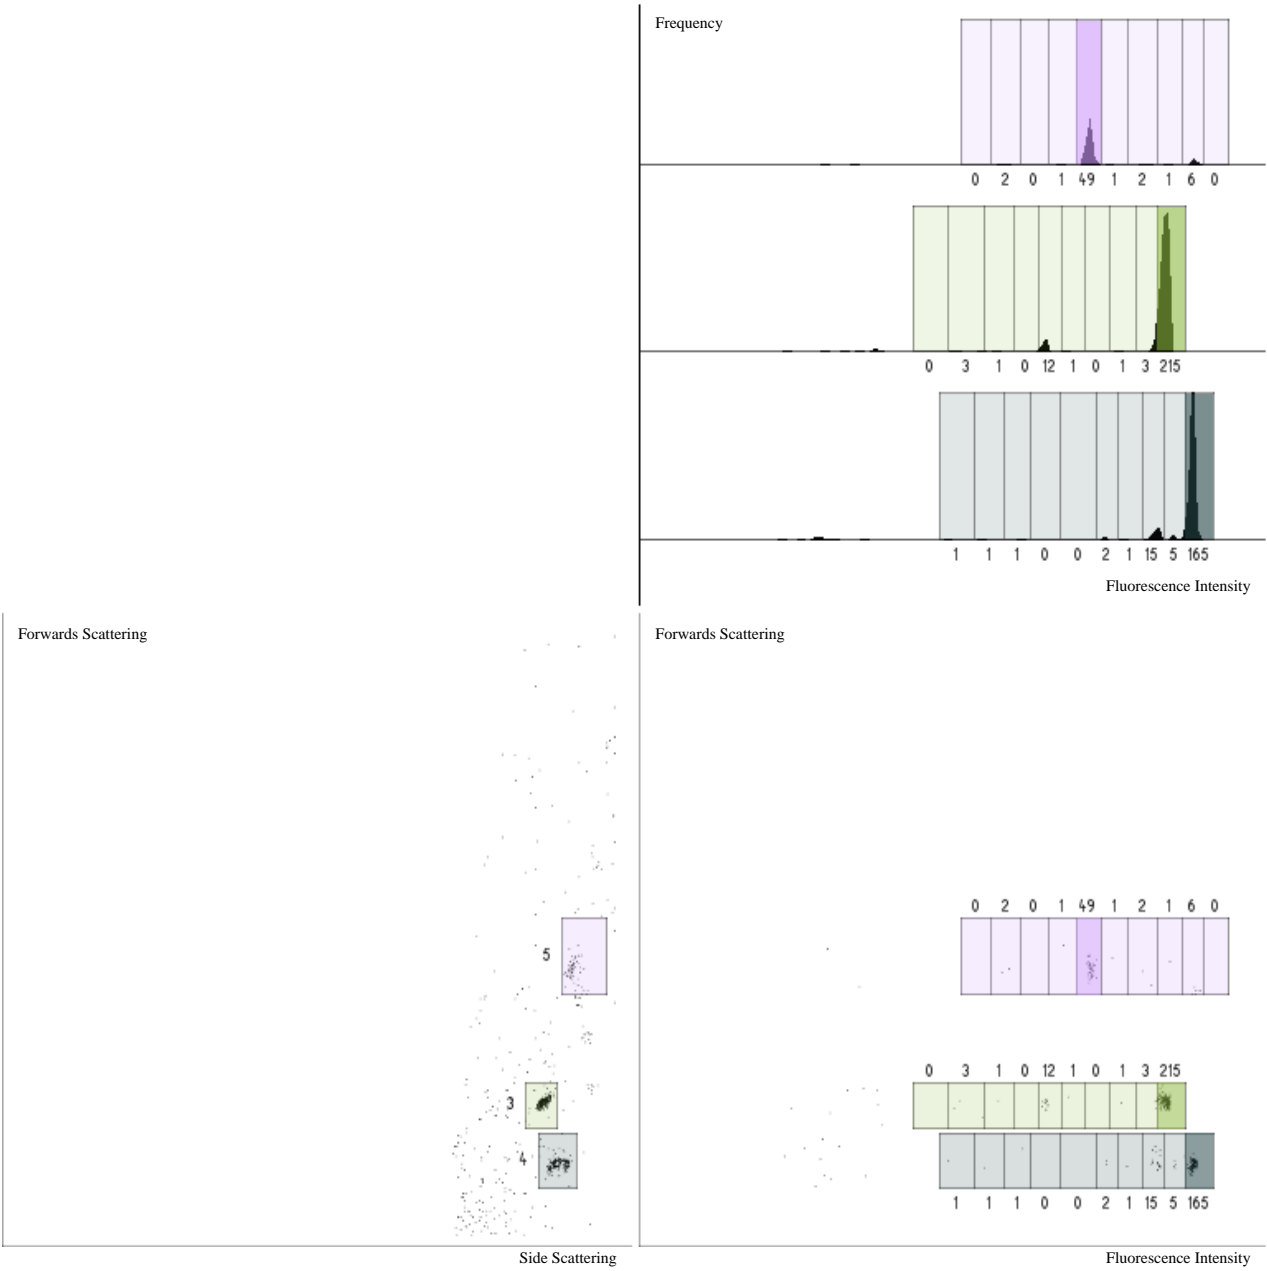

ANNEX 3: TAG DECONVOLUTION - BEAD 18

Passes flow sorting criteria: Yes  
Passes tag deconvolution criteria: Yes  
Included in protocol analysis: Yes  
Protocol: 4, 6, 9, 1  
Filename: Bin1\_plateA0\_F3.fcs  
Split 1: Petrol shading  
Split 2: Green shading  
Split 3: Violet shading

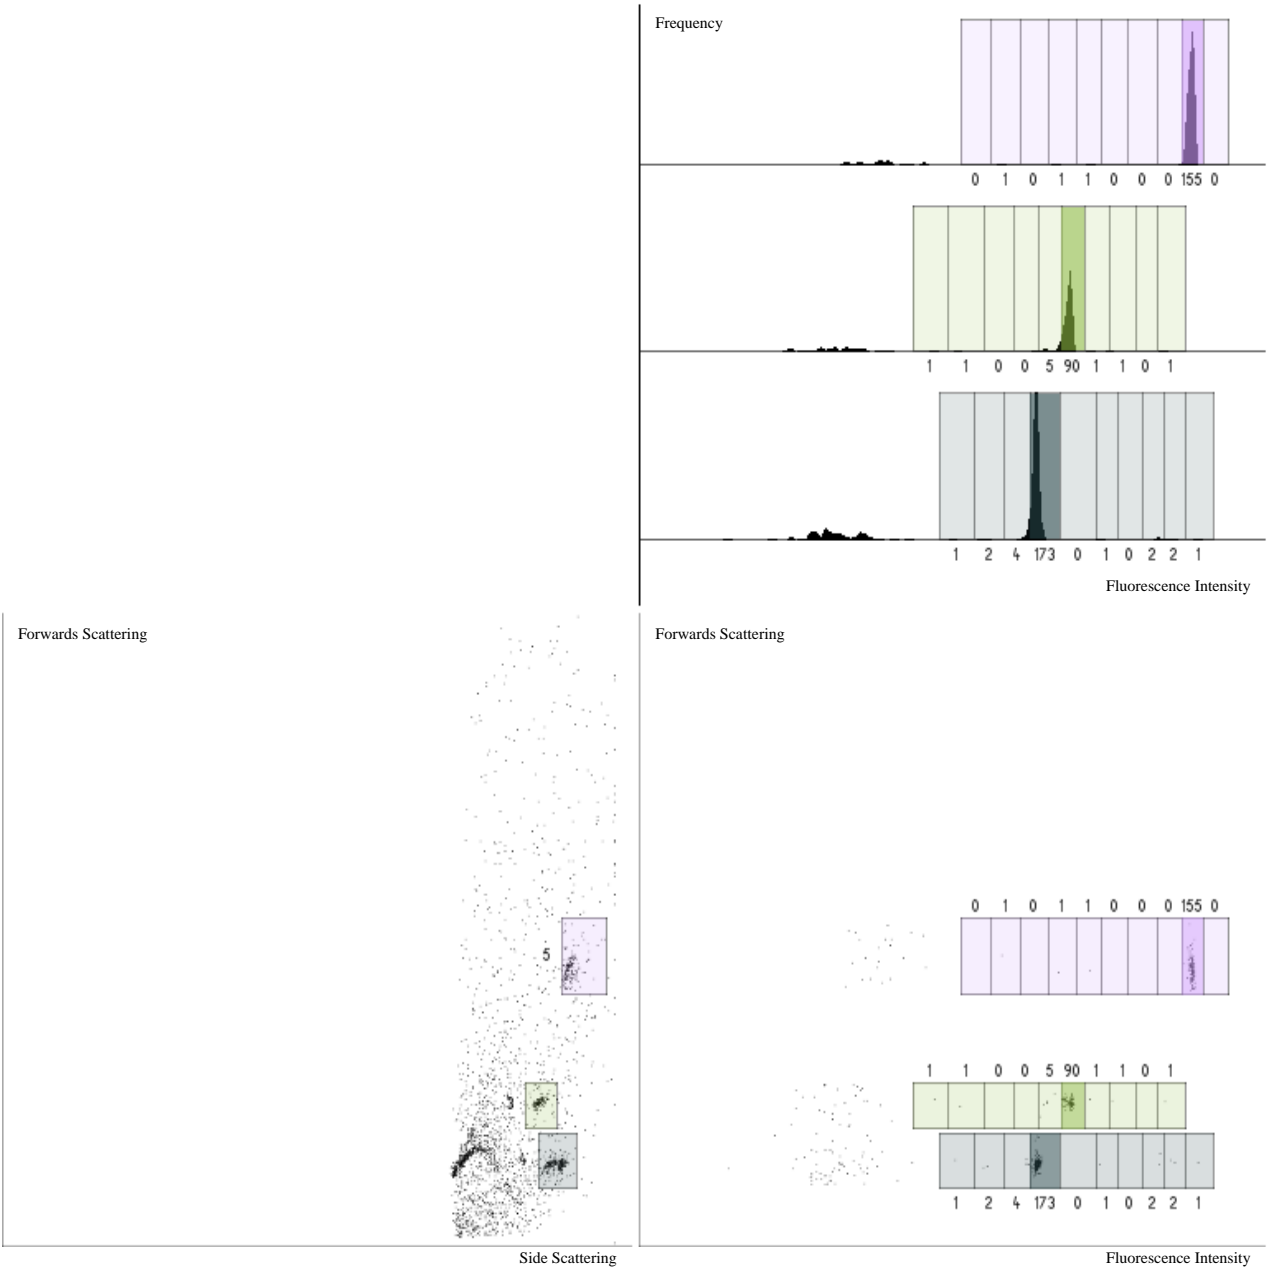

ANNEX 3: TAG DECONVOLUTION - BEAD 19

Passes flow sorting criteria: Yes  
Passes tag deconvolution criteria: Yes  
Included in protocol analysis: Yes  
Protocol: 7, 2, 10, 1  
Filename: Bin1\_plateA0\_G1.fcs  
Split 1: Petrol shading  
Split 2: Green shading  
Split 3: Violet shading

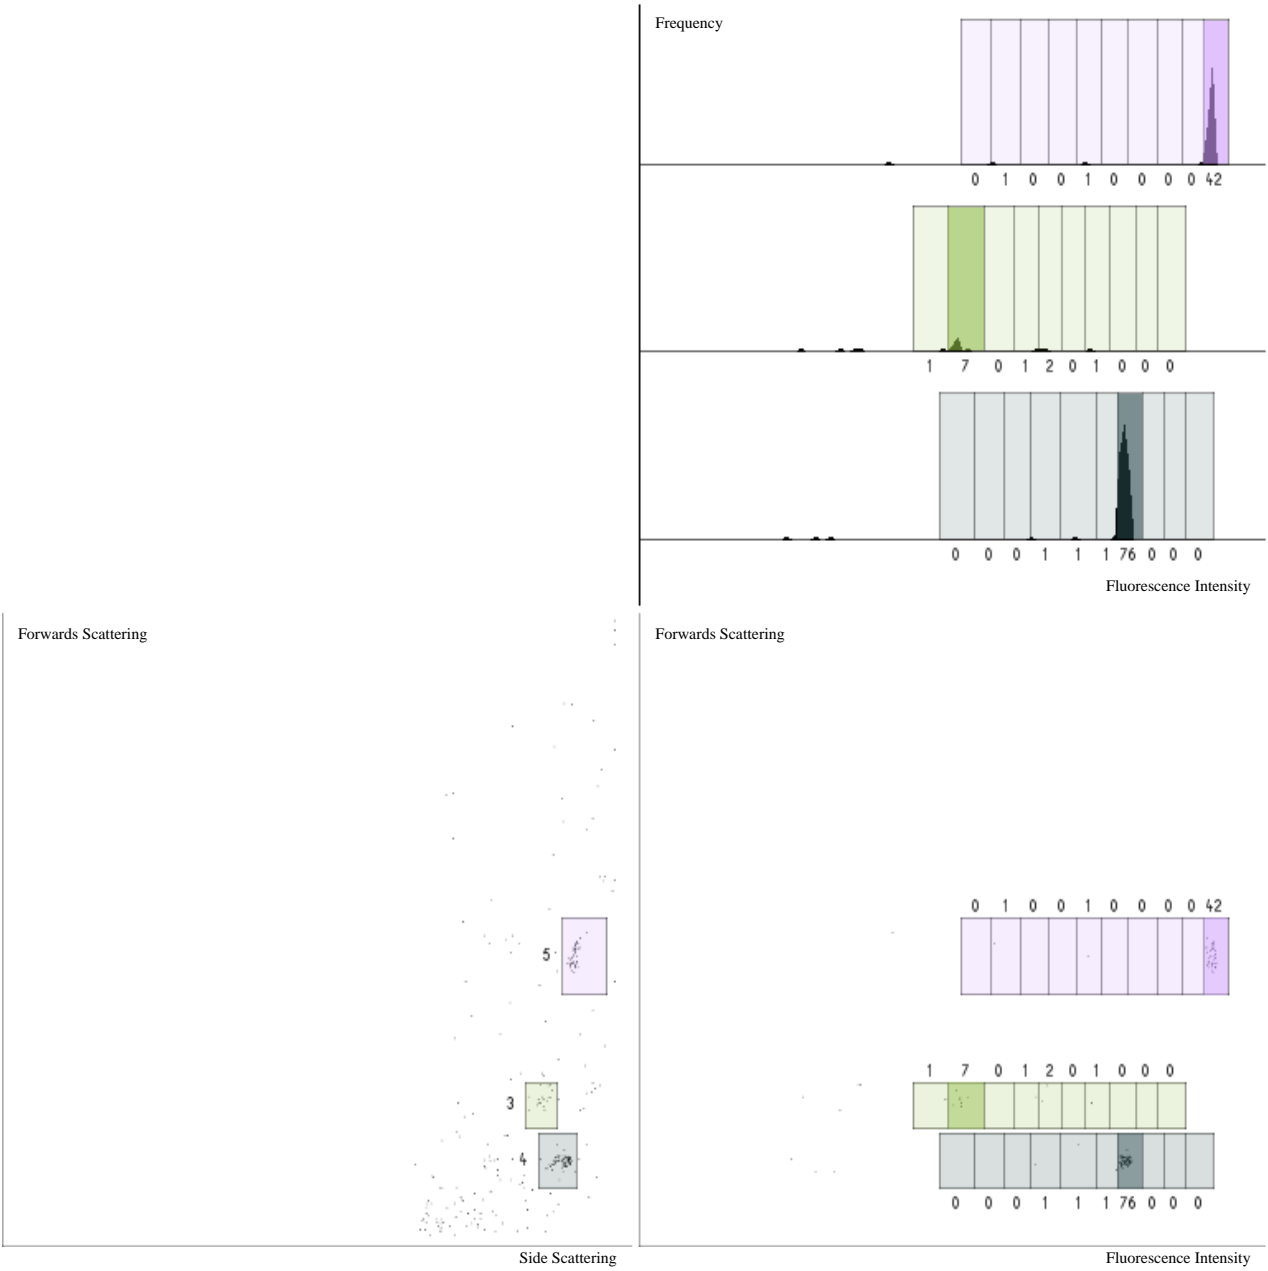

ANNEX 3: TAG DECONVOLUTION - BEAD 20

Passes flow sorting criteria: Yes  
Passes tag deconvolution criteria: No  
Included in protocol analysis: No  
Protocol: N/A  
Filename: Bin1\_plateA0\_G2.fcs  
Split 1: Petrol shading  
Split 2: Green shading  
Split 3: Violet shading

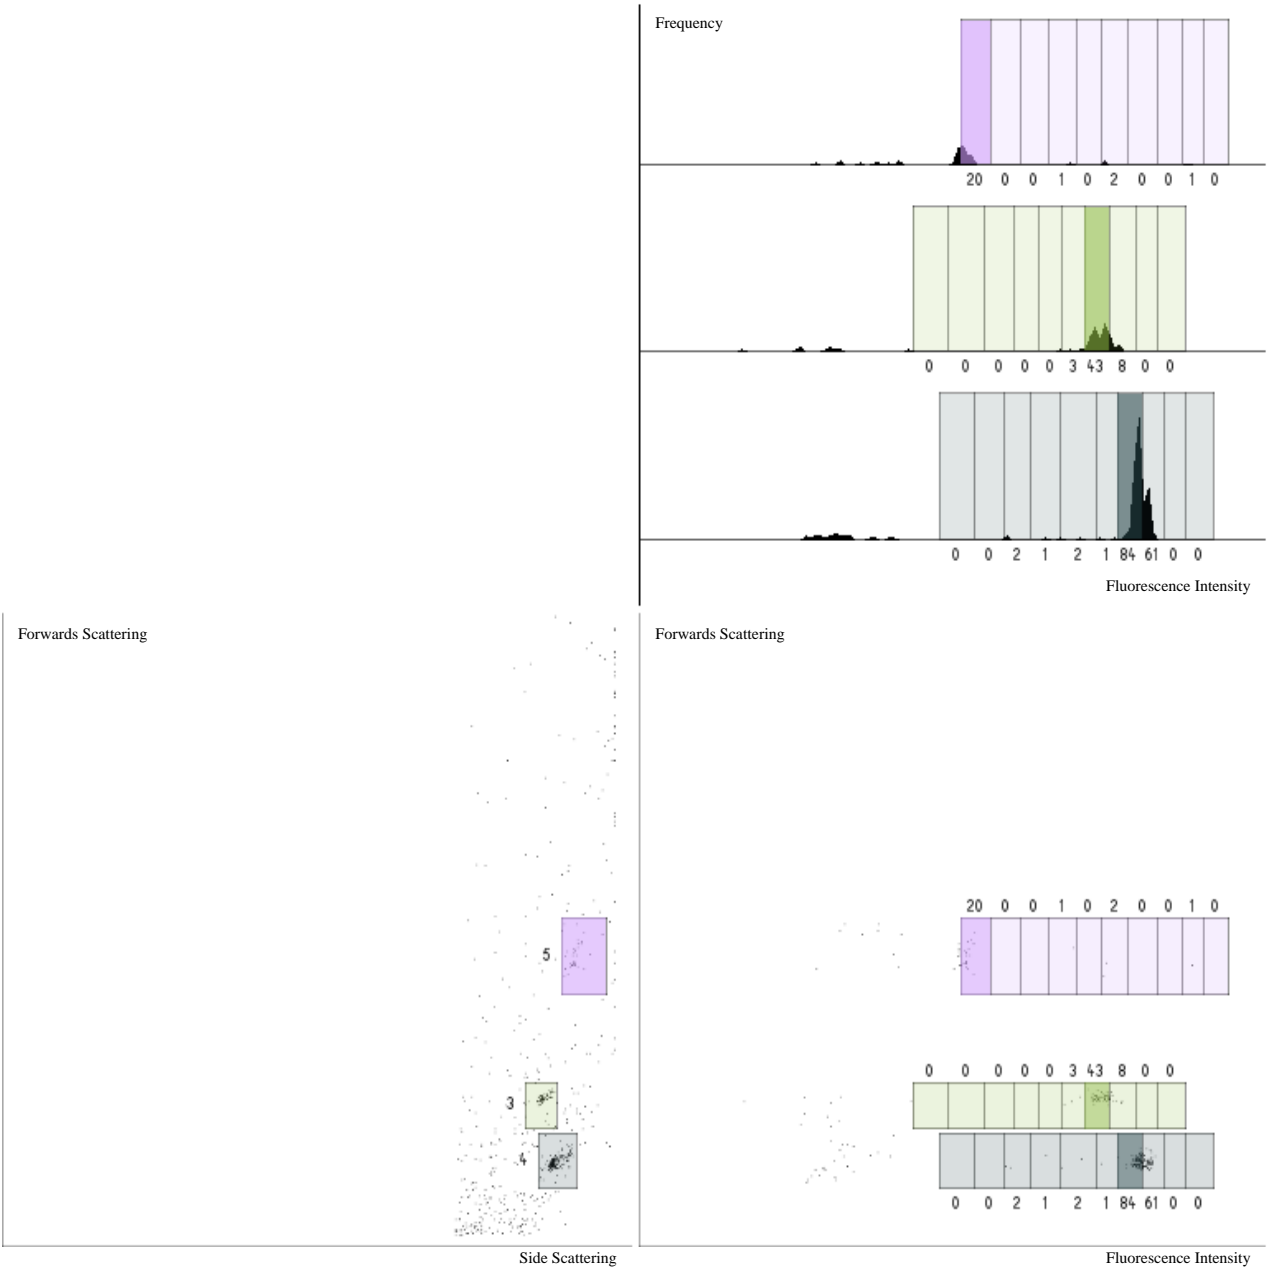

ANNEX 3: TAG DECONVOLUTION - BEAD 21

Passes flow sorting criteria: Yes  
Passes tag deconvolution criteria: Yes  
Included in protocol analysis: Yes  
Protocol: 9, 4, 2, 1  
Filename: Bin1\_plateA0\_G3.fcs  
Split 1: Petrol shading  
Split 2: Green shading  
Split 3: Violet shading

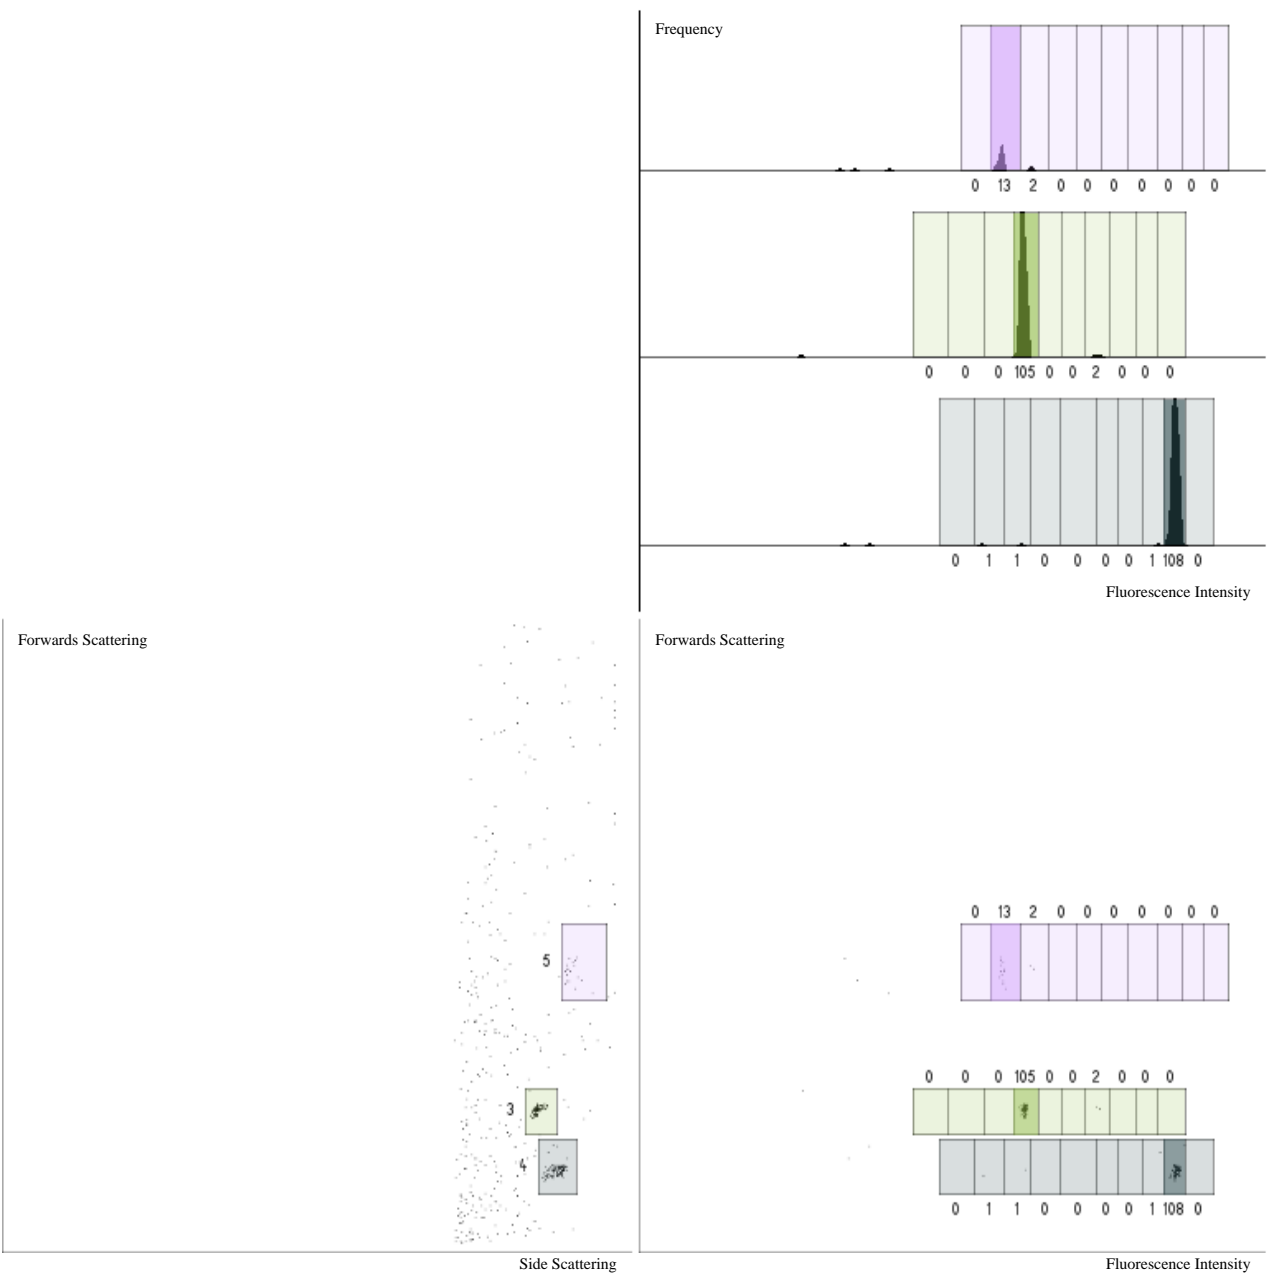

ANNEX 3: TAG DECONVOLUTION - BEAD 22

Passes flow sorting criteria: Yes  
Passes tag deconvolution criteria: No  
Included in protocol analysis: No  
Protocol: N/A  
Filename: Bin1\_plateA0\_H1.fcs  
Split 1: Petrol shading  
Split 2: Green shading  
Split 3: Violet shading

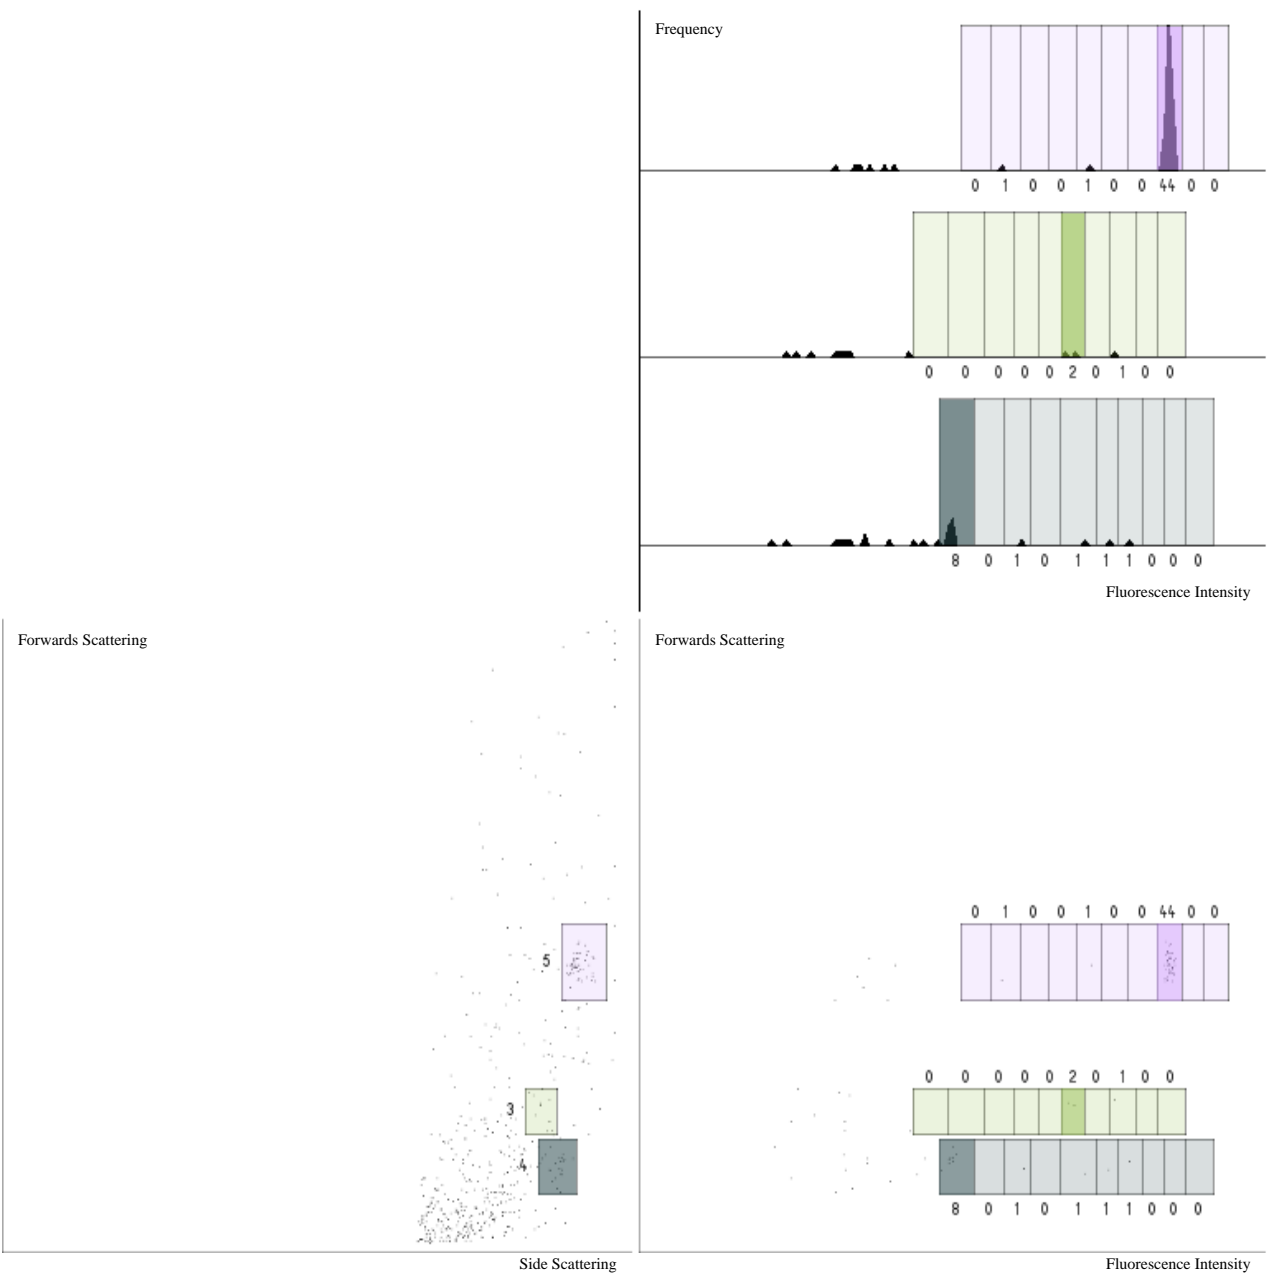



ANNEX 3: TAG DECONVOLUTION - BEAD 23

Passes flow sorting criteria: Yes  
Passes tag deconvolution criteria: Yes  
Included in protocol analysis: Yes  
Protocol: 1, 8, 9, 1  
Filename: Bin1\_plateA0\_H2.fcs  
Split 1: Petrol shading  
Split 2: Green shading  
Split 3: Violet shading

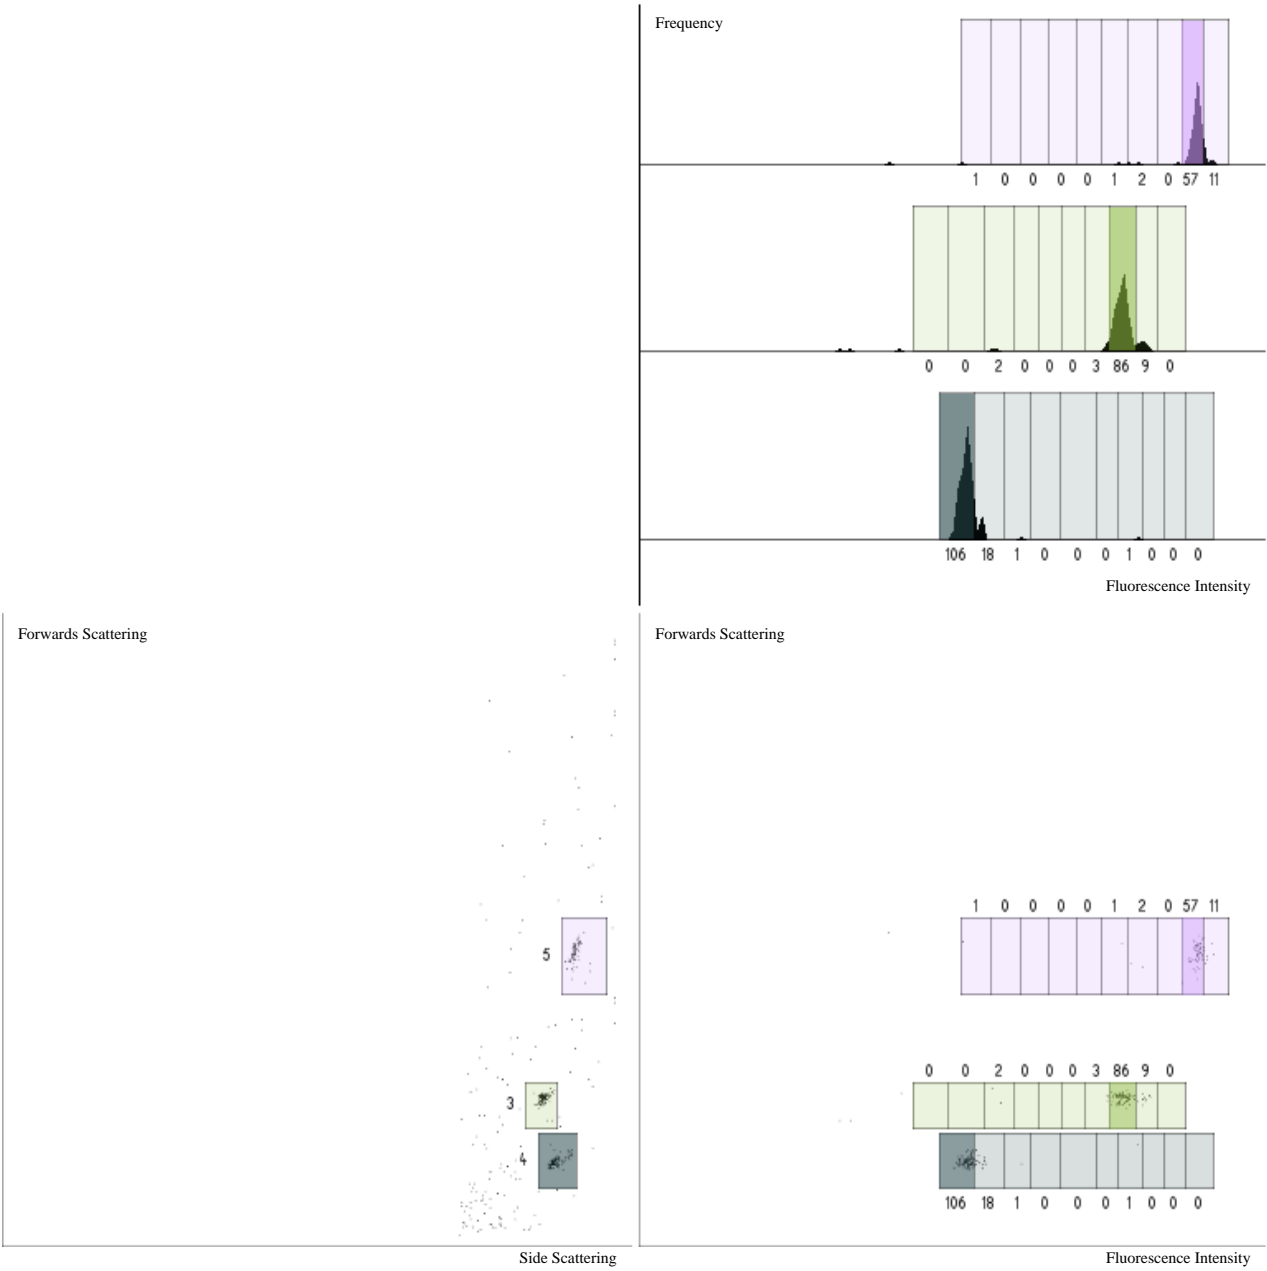

ANNEX 3: TAG DECONVOLUTION - BEAD 24

Passes flow sorting criteria: Yes  
Passes tag deconvolution criteria: Yes  
Included in protocol analysis: Yes  
Protocol: 6, 7, 6, 1  
Filename: Bin1\_plateA0\_H6.fcs  
Split 1: Petrol shading  
Split 2: Green shading  
Split 3: Violet shading

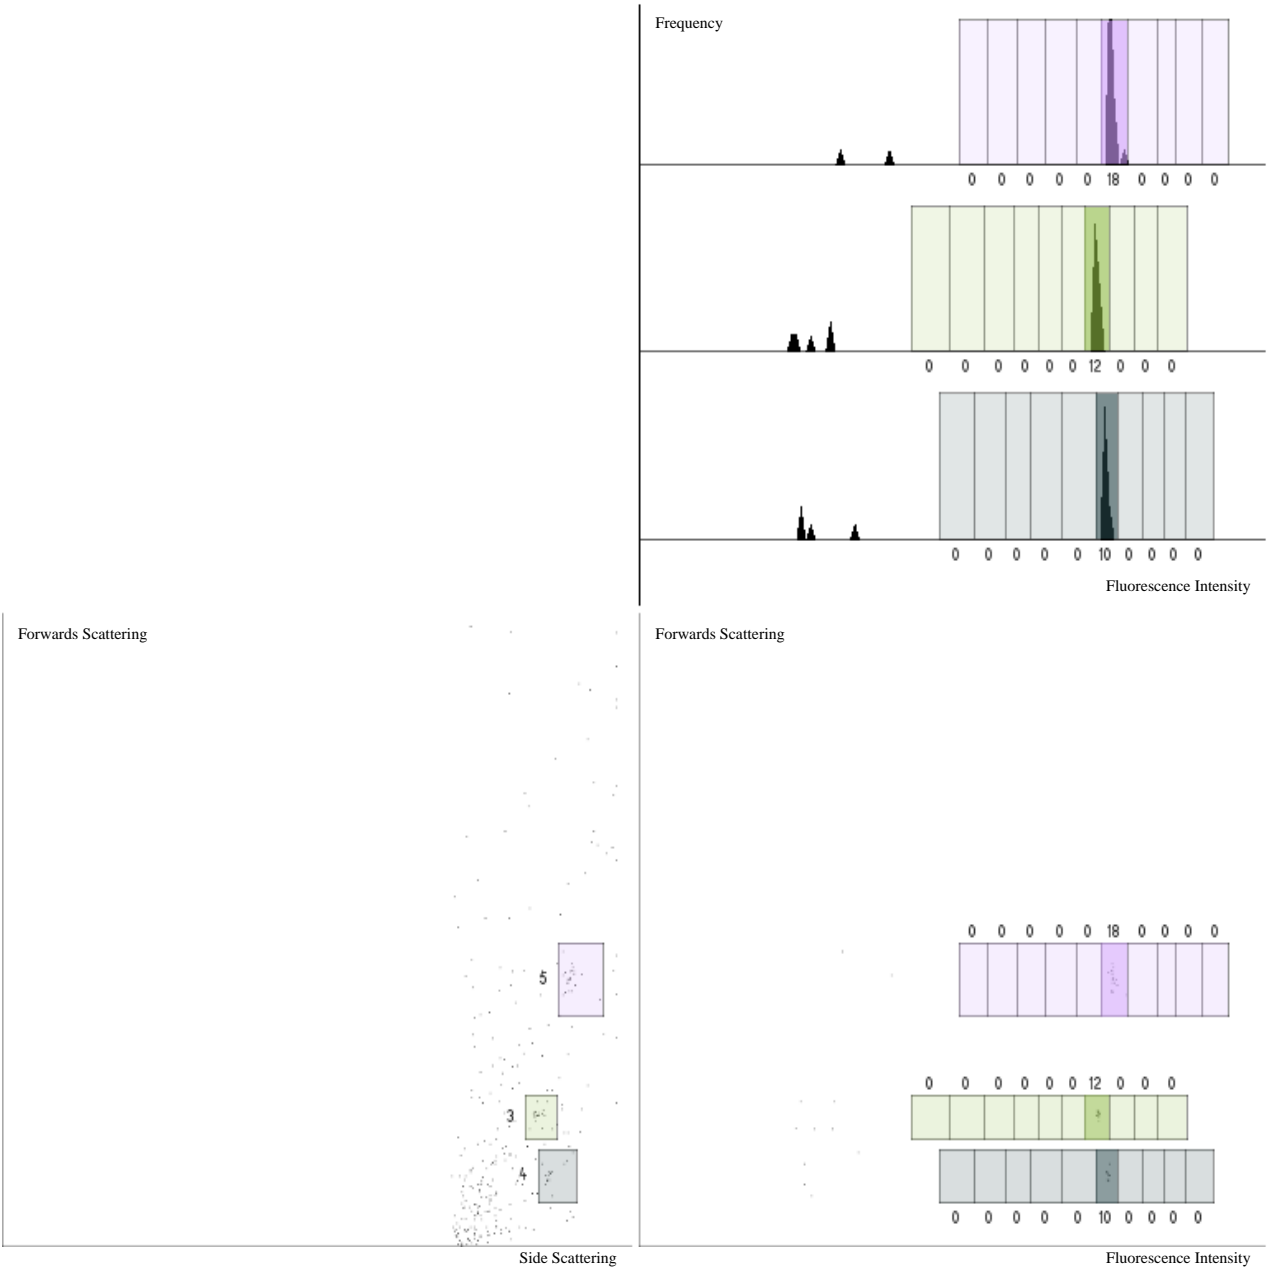

ANNEX 3: TAG DECONVOLUTION - BEAD 25

Passes flow sorting criteria: Yes  
Passes tag deconvolution criteria: Yes  
Included in protocol analysis: Yes  
Protocol: 9, 7, 5, 1  
Filename: Bin1\_plateA0\_A4.fcs  
Split 1: Petrol shading  
Split 2: Green shading  
Split 3: Violet shading

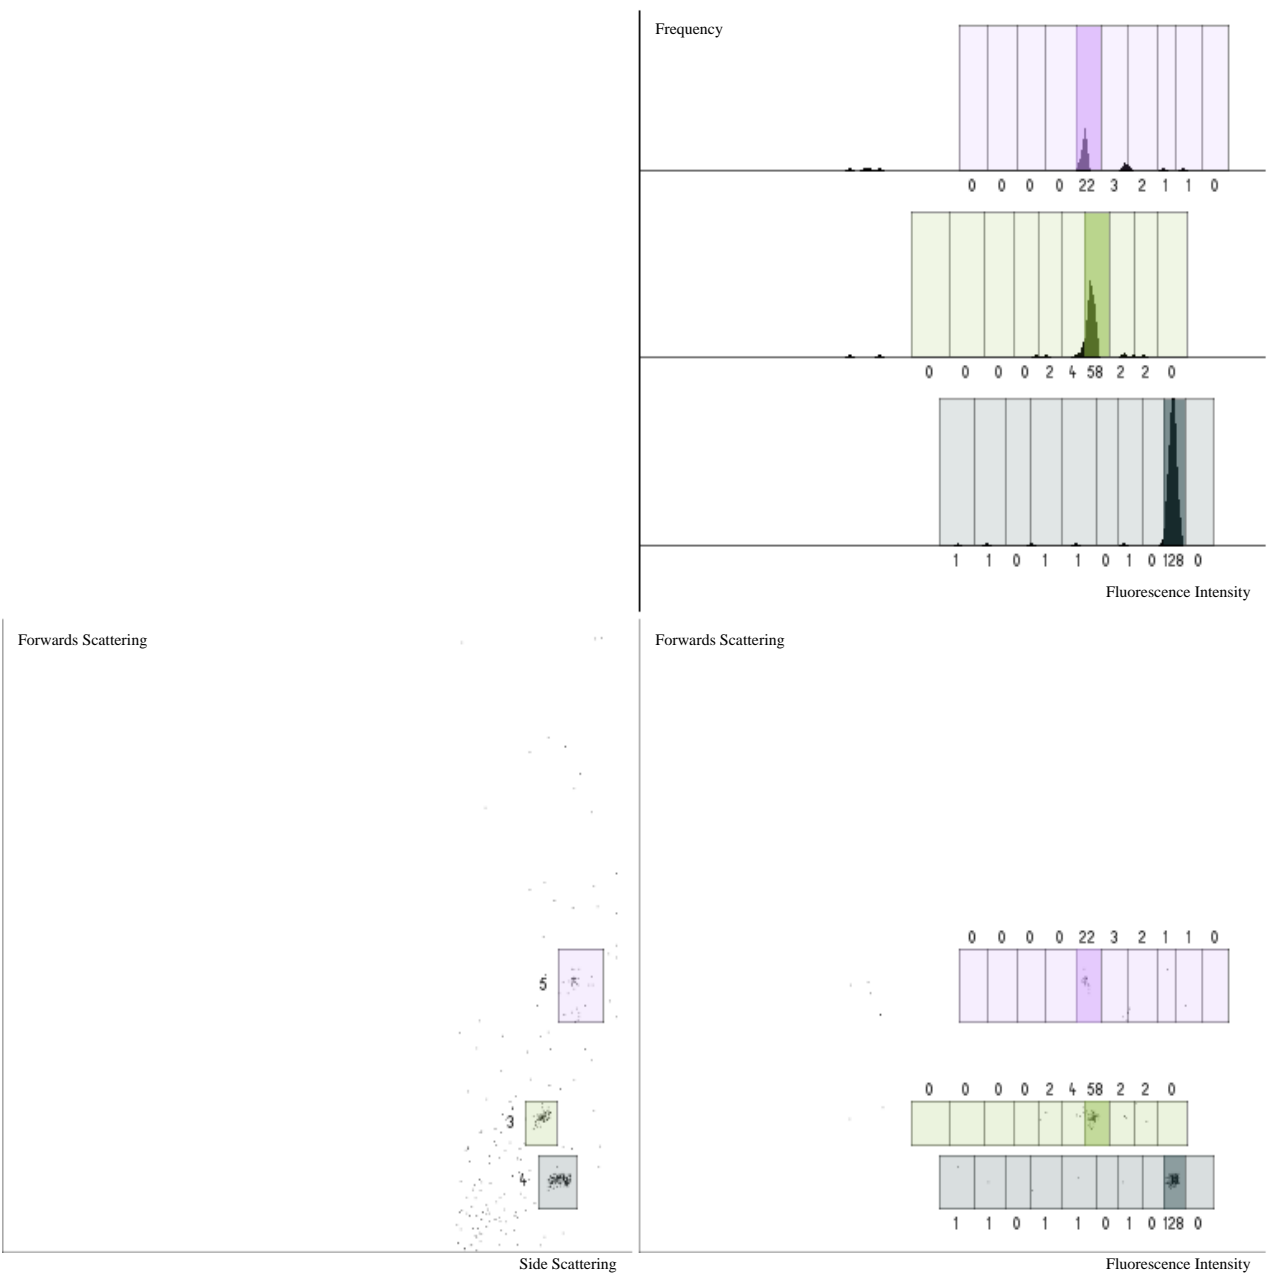

ANNEX 3: TAG DECONVOLUTION - BEAD 26

Passes flow sorting criteria: Yes  
Passes tag deconvolution criteria: Yes  
Included in protocol analysis: Yes  
Protocol: 5, 9, 9, 1  
Filename: Bin1\_plateA0\_A5.fcs  
Split 1: Petrol shading  
Split 2: Green shading  
Split 3: Violet shading

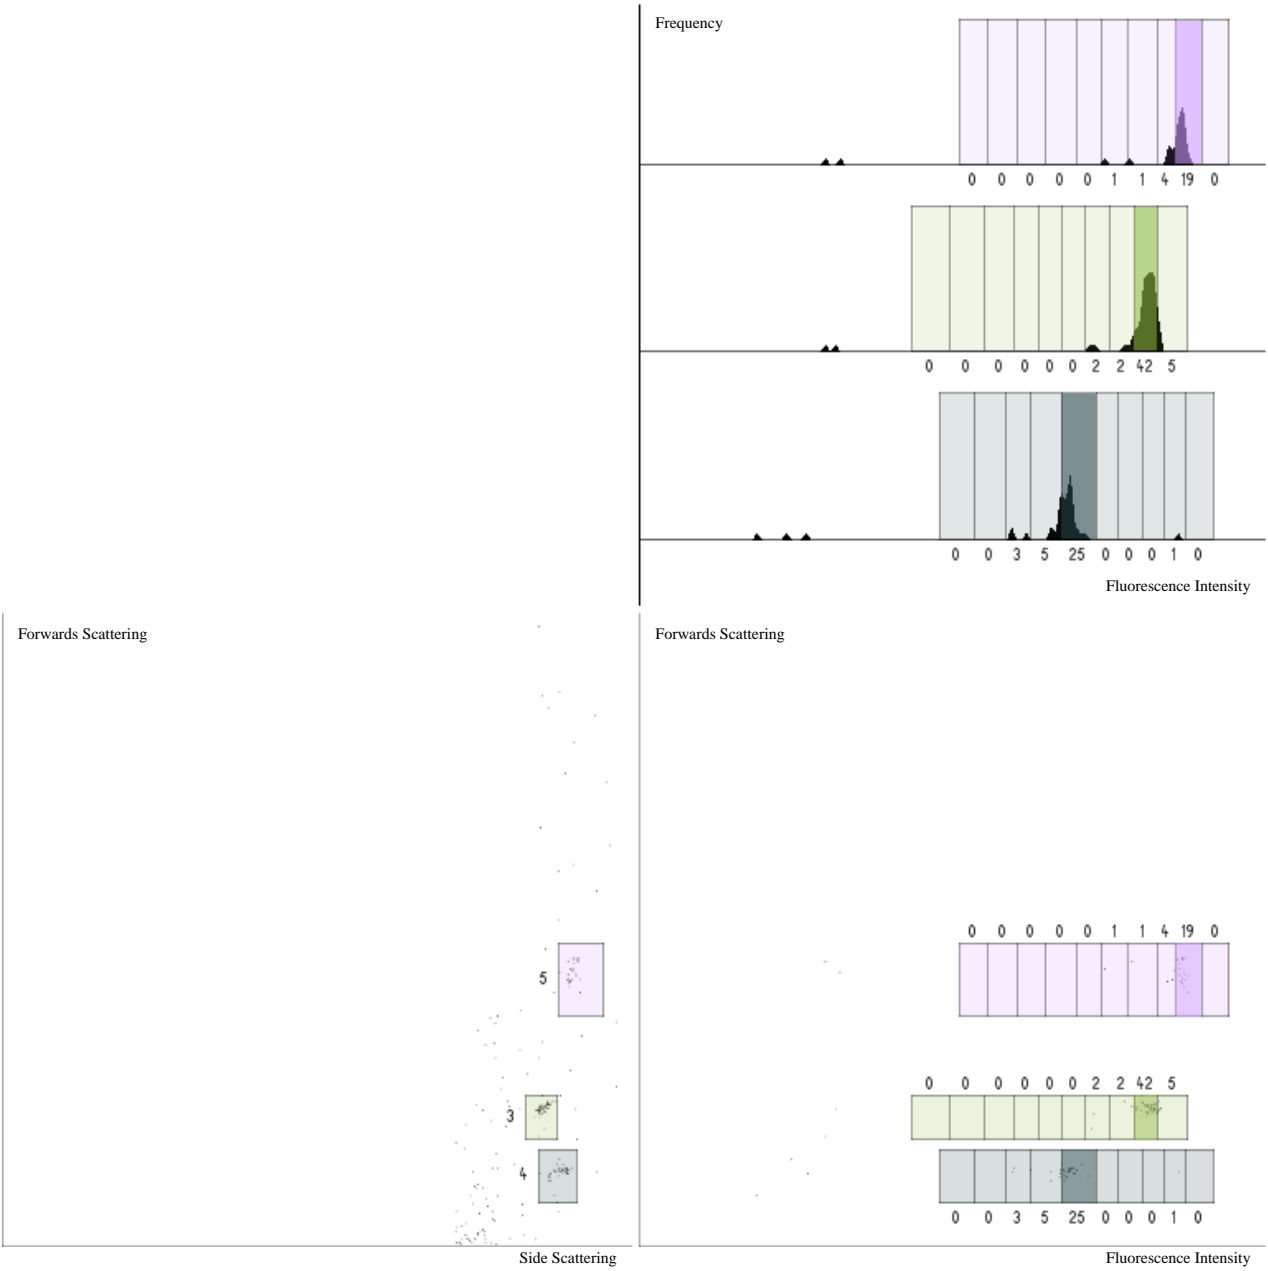

ANNEX 3: TAG DECONVOLUTION - BEAD 27

Passes flow sorting criteria: Yes  
Passes tag deconvolution criteria: Yes  
Included in protocol analysis: Yes  
Protocol: 10, 7, 5, 1  
Filename: Bin1\_plateA0\_A6.fcs  
Split 1: Petrol shading  
Split 2: Green shading  
Split 3: Violet shading

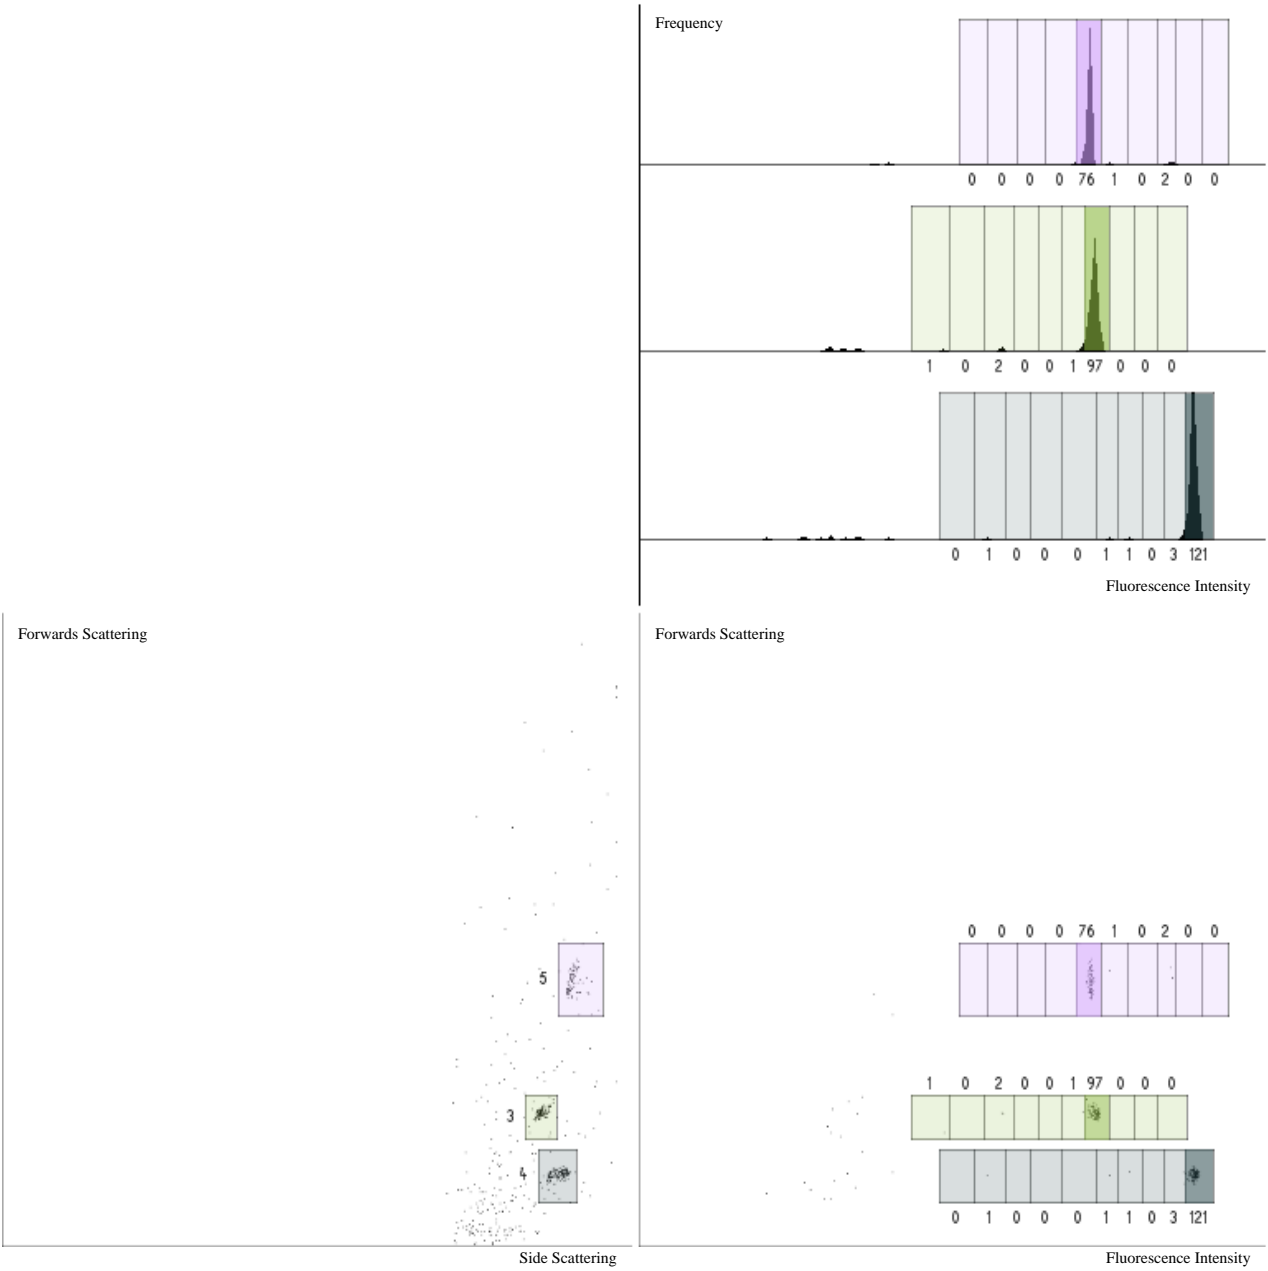

ANNEX 3: TAG DECONVOLUTION - BEAD 28

Passes flow sorting criteria: Yes  
Passes tag deconvolution criteria: Yes  
Included in protocol analysis: Yes  
Protocol: 6, 1, 9, 1  
Filename: Bin1\_plateA0\_A7.fcs  
Split 1: Petrol shading  
Split 2: Green shading  
Split 3: Violet shading

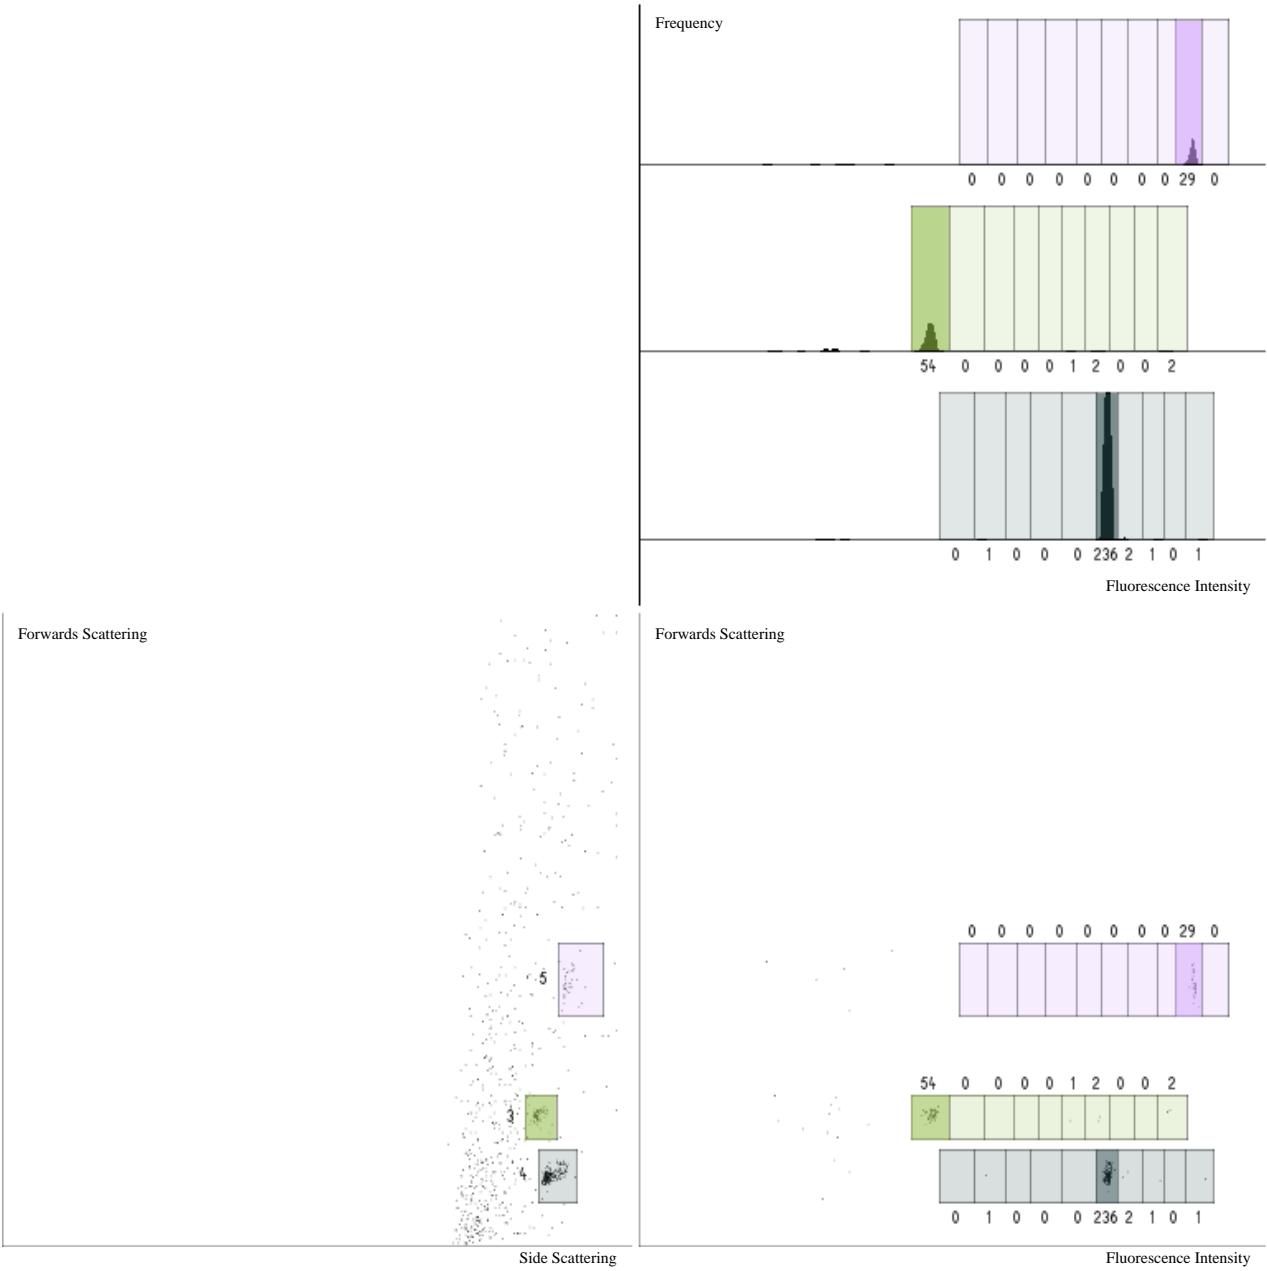

ANNEX 3: TAG DECONVOLUTION - BEAD 29

Passes flow sorting criteria: Yes  
Passes tag deconvolution criteria: Yes  
Included in protocol analysis: Yes  
Protocol: 10, 7, 9, 1  
Filename: Bin1\_plateA0\_B4.fcs  
Split 1: Petrol shading  
Split 2: Green shading  
Split 3: Violet shading

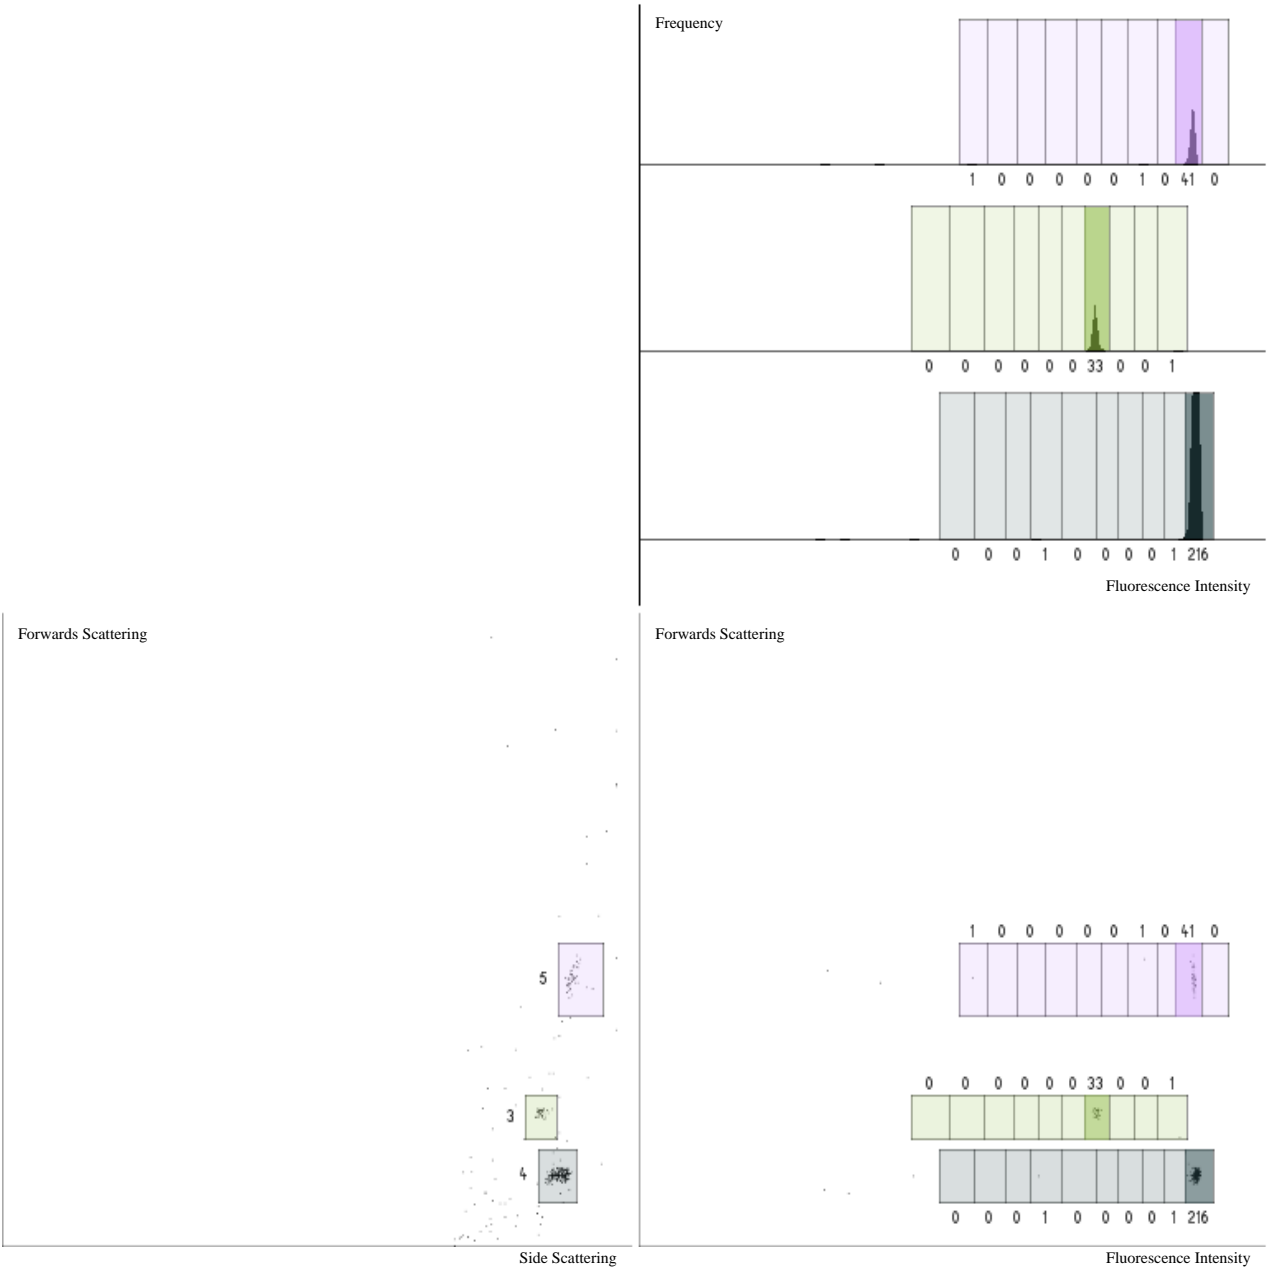

ANNEX 3: TAG DECONVOLUTION - BEAD 30

Passes flow sorting criteria: Yes  
Passes tag deconvolution criteria: No  
Included in protocol analysis: No  
Protocol: N/A  
Filename: Bin1\_plateA0\_B5.fcs  
Split 1: Petrol shading  
Split 2: Green shading  
Split 3: Violet shading

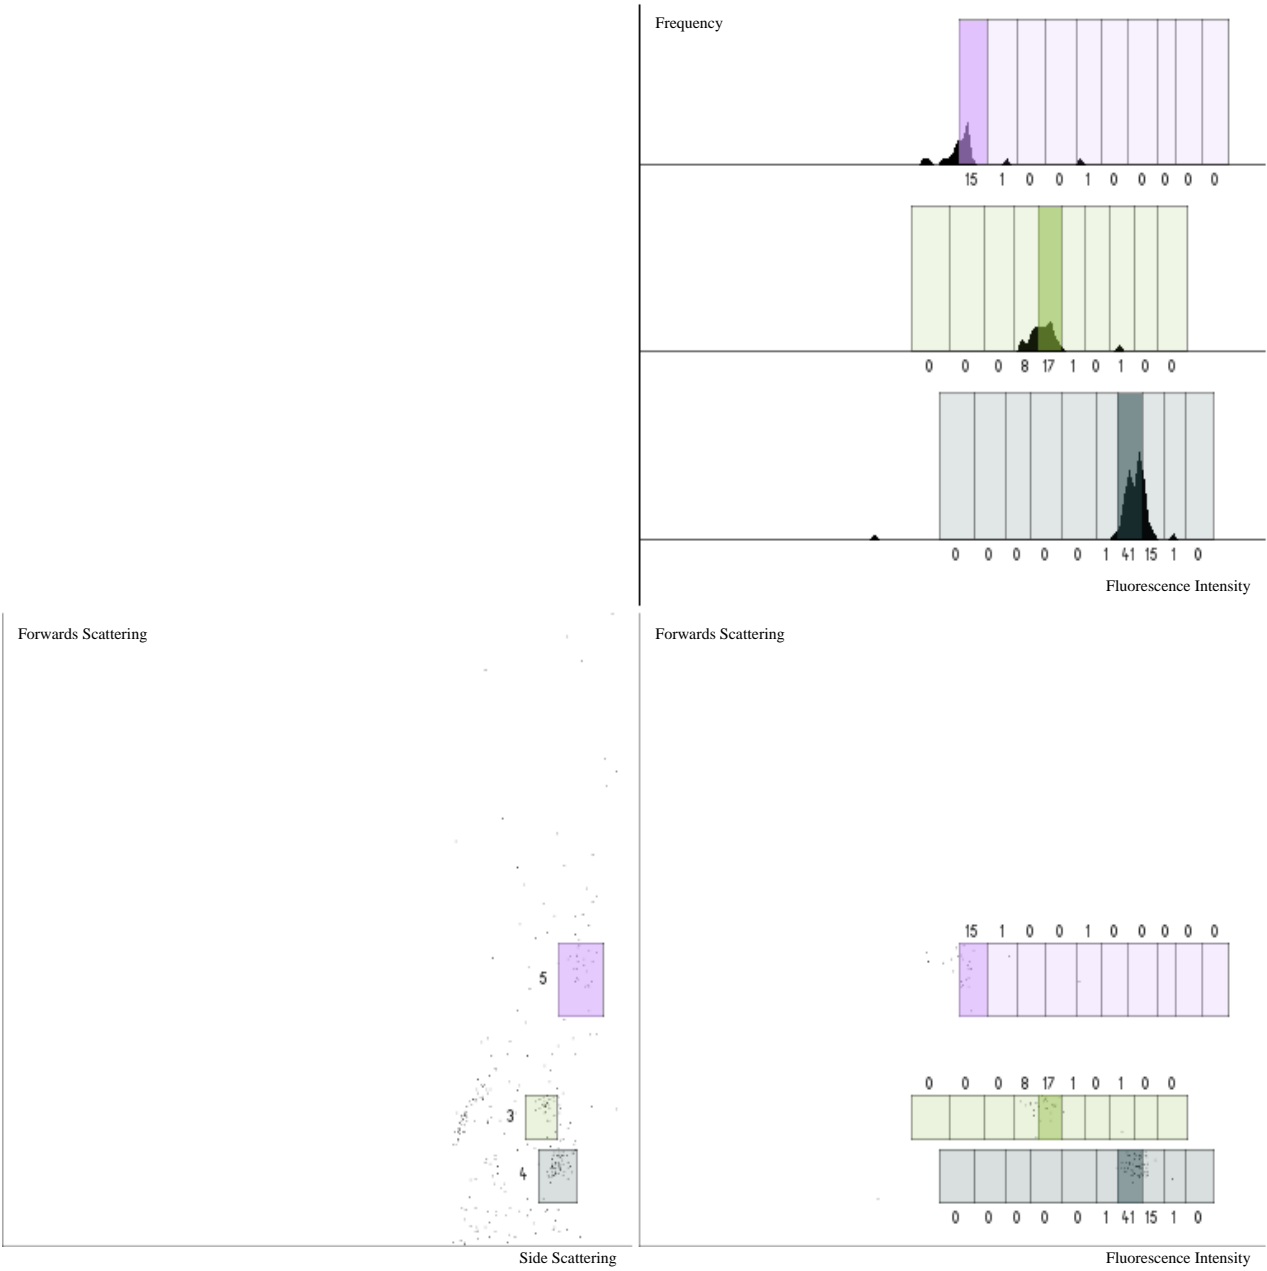



ANNEX 3: TAG DECONVOLUTION - BEAD 31

Passes flow sorting criteria: Yes  
Passes tag deconvolution criteria: No  
Included in protocol analysis: No  
Protocol: N/A  
Filename: Bin1\_plateA0\_B6.fcs  
Split 1: Petrol shading  
Split 2: Green shading  
Split 3: Violet shading

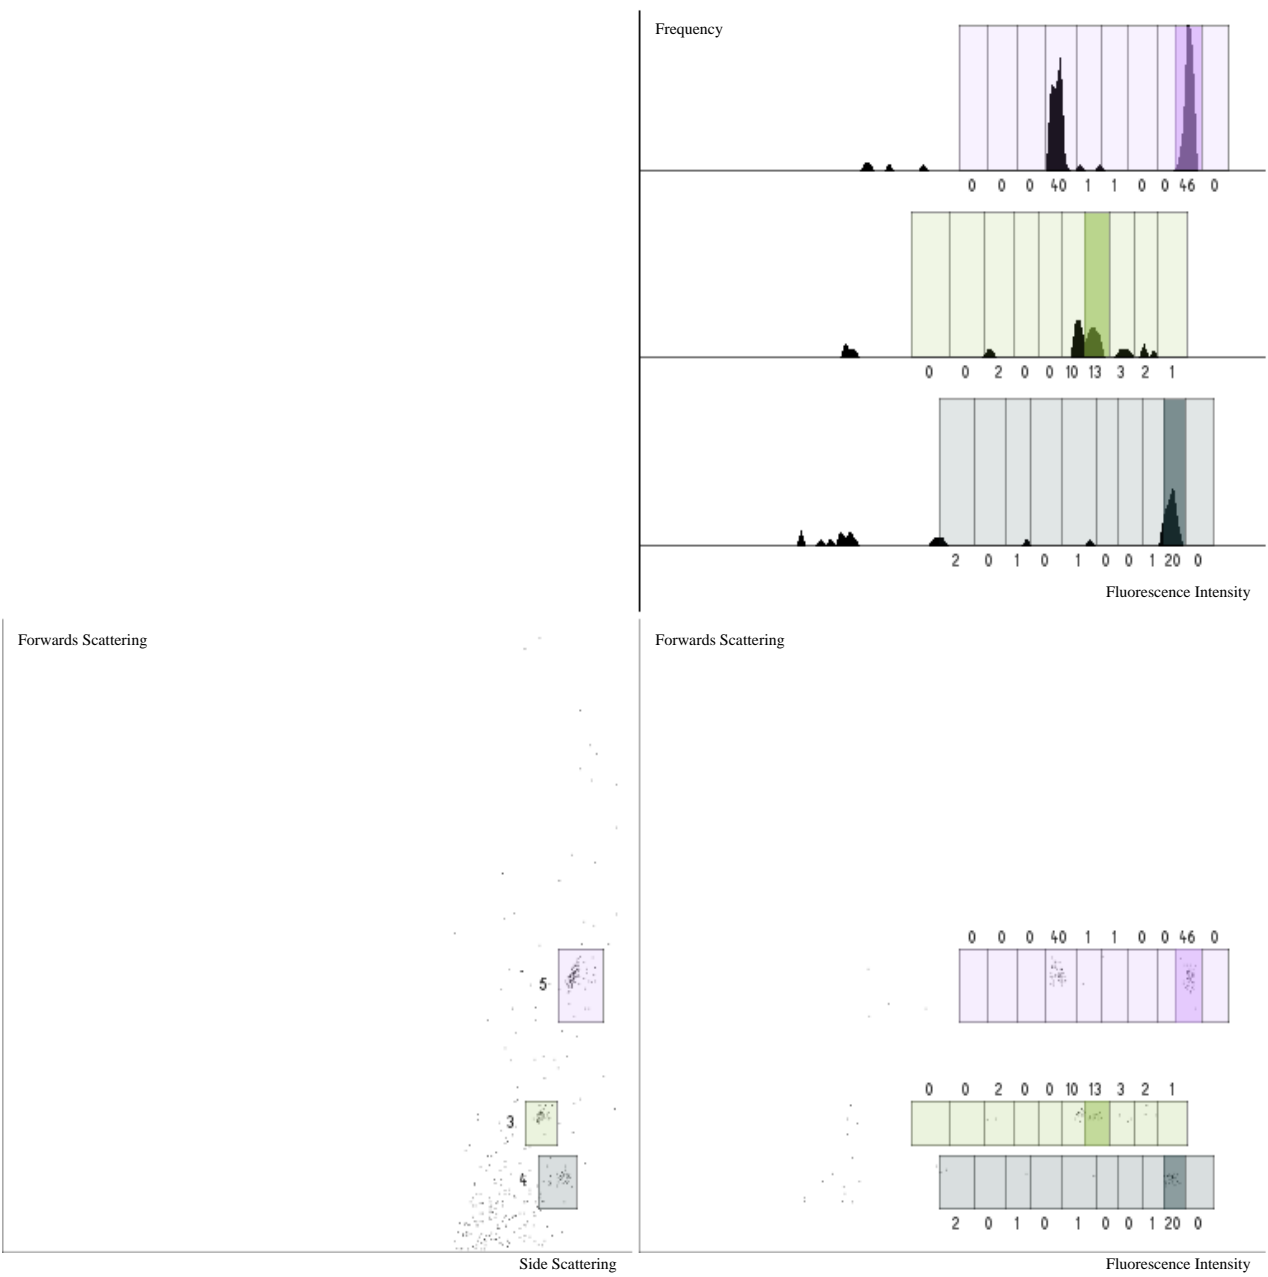

ANNEX 3: TAG DECONVOLUTION - BEAD 32

Passes flow sorting criteria: Yes  
Passes tag deconvolution criteria: Yes  
Included in protocol analysis: Yes  
Protocol: 10, 6, 7, 1  
Filename: Bin1\_plateA0\_B7.fcs  
Split 1: Petrol shading  
Split 2: Green shading  
Split 3: Violet shading

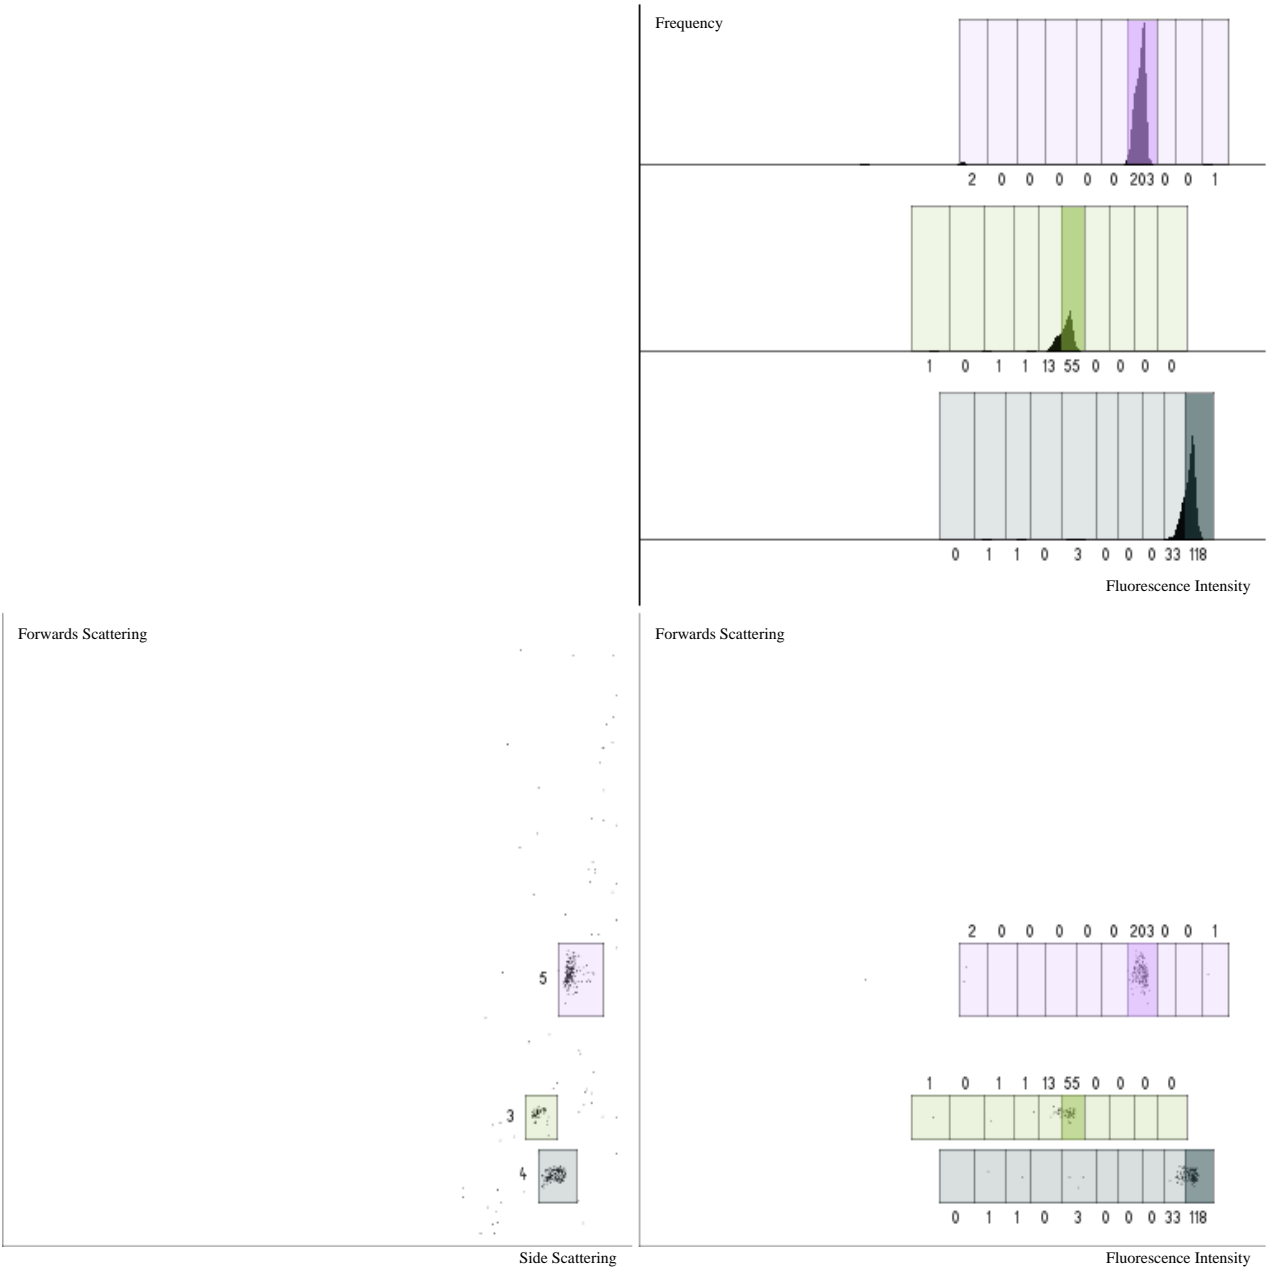

ANNEX 3: TAG DECONVOLUTION - BEAD 33

Passes flow sorting criteria: Yes  
Passes tag deconvolution criteria: No  
Included in protocol analysis: No  
Protocol: N/A  
Filename: Bin1\_plateA0\_C4.fcs  
Split 1: Petrol shading  
Split 2: Green shading  
Split 3: Violet shading

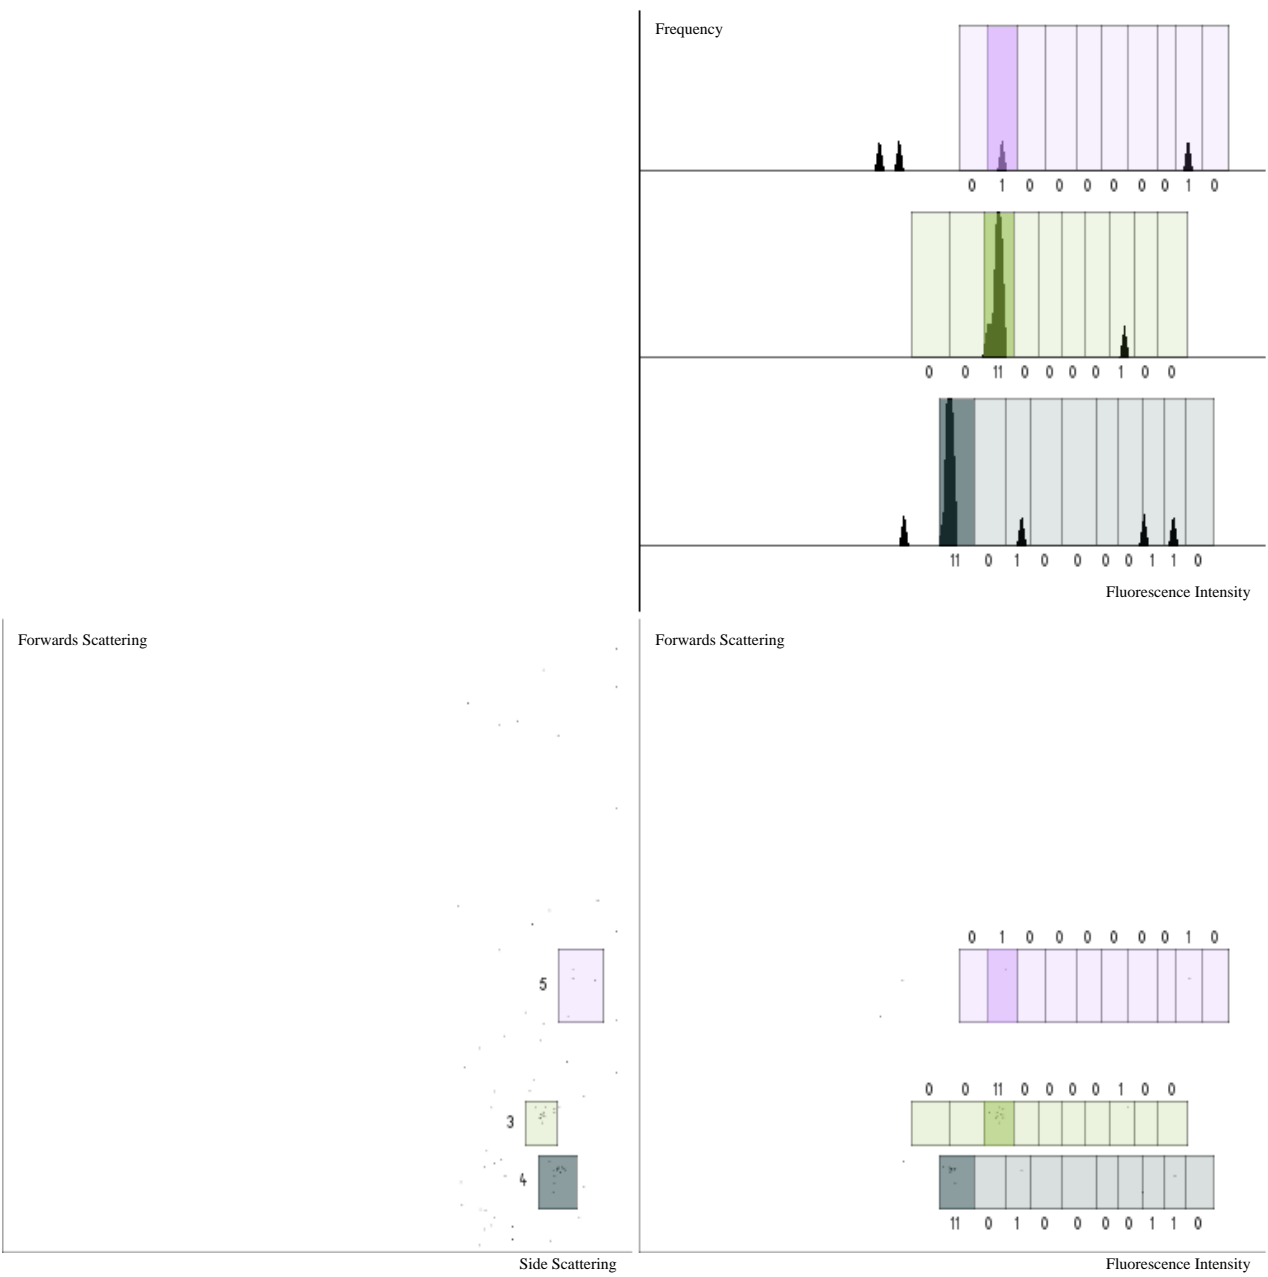

ANNEX 3: TAG DECONVOLUTION - BEAD 34

Passes flow sorting criteria: Yes  
Passes tag deconvolution criteria: Yes  
Included in protocol analysis: Yes  
Protocol: 6, 10, 6, 1  
Filename: Bin1\_plateA0\_C5.fcs  
Split 1: Petrol shading  
Split 2: Green shading  
Split 3: Violet shading

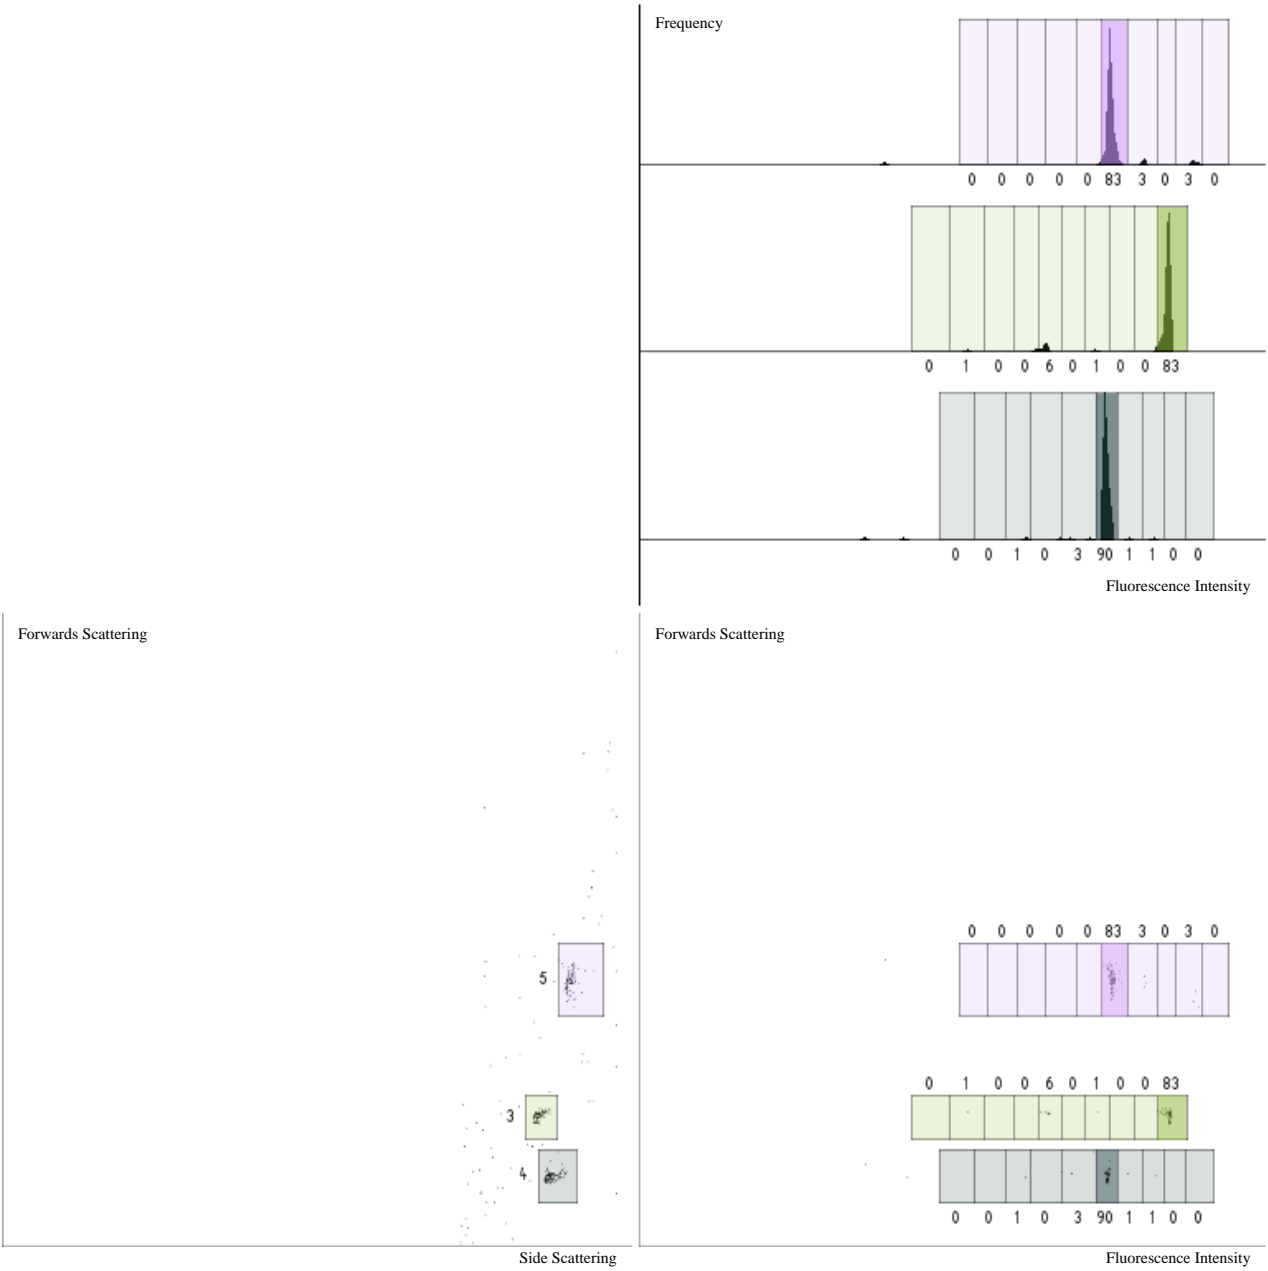

ANNEX 3: TAG DECONVOLUTION - BEAD 35

Passes flow sorting criteria: Yes  
Passes tag deconvolution criteria: Yes  
Included in protocol analysis: Yes  
Protocol: 5, 2, 7, 1  
Filename: Bin1\_plateA0\_C6.fcs  
Split 1: Petrol shading  
Split 2: Green shading  
Split 3: Violet shading

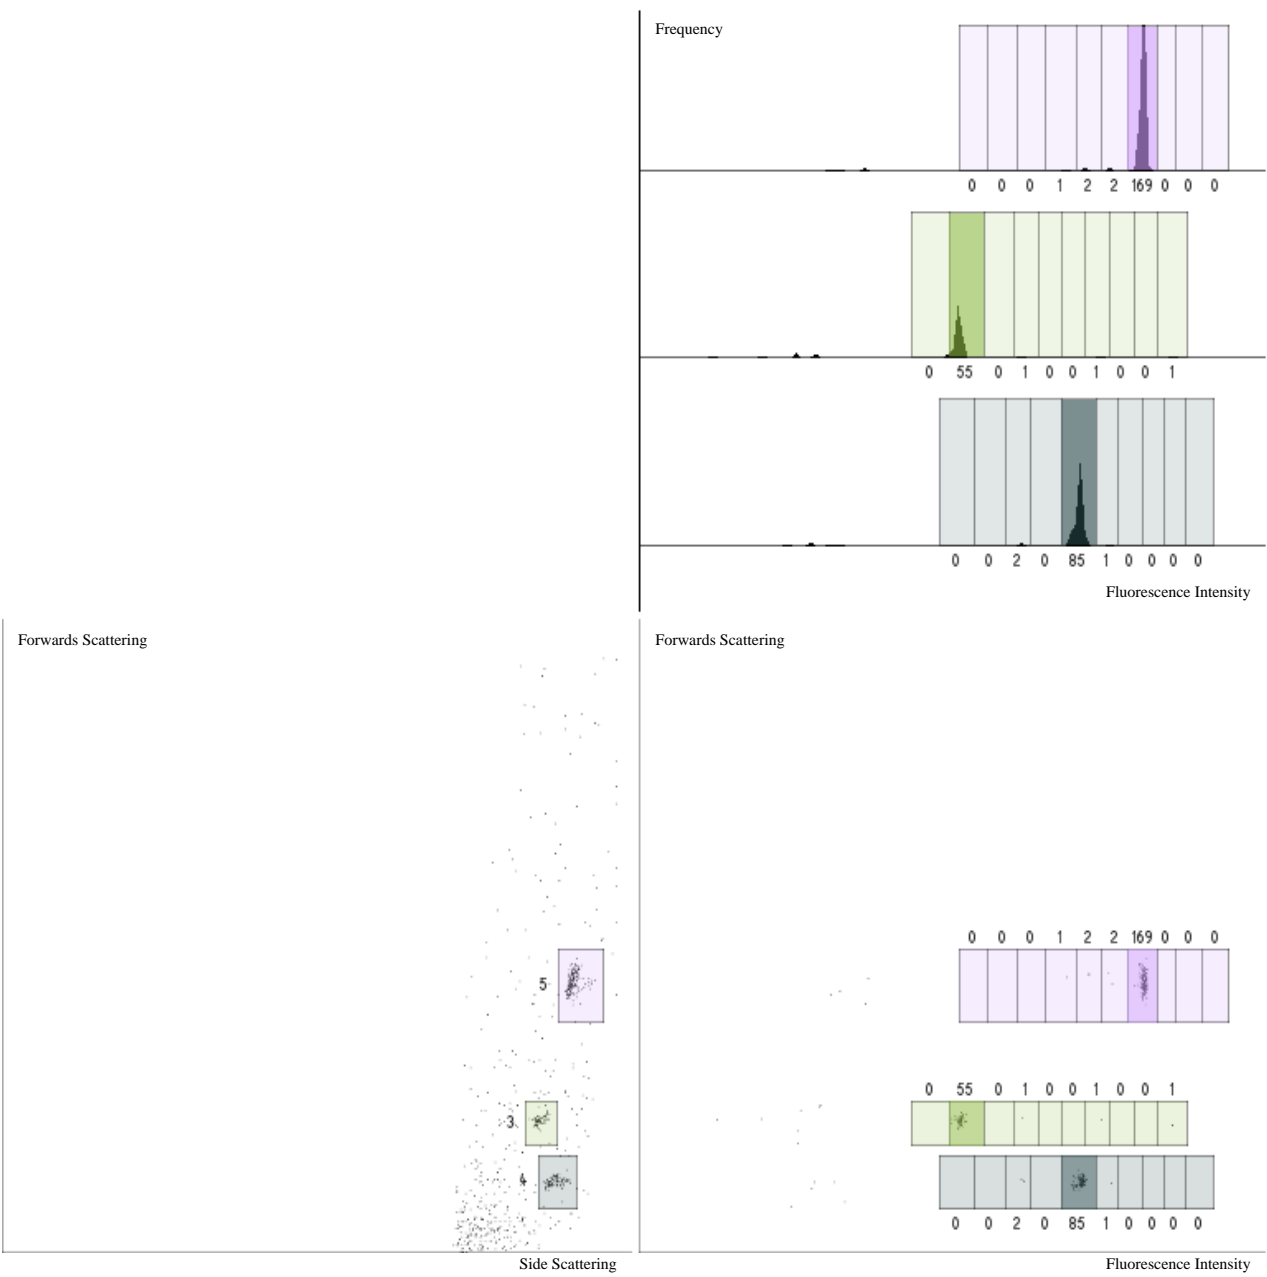

## ANNEX 3: TAG DECONVOLUTION - BEAD 36

Passes flow sorting criteria: Yes

Passes tag deconvolution criteria: Yes

Included in protocol analysis: Yes

Protocol: 1, 10, 5, 1

Filename: Bin1\_plateA0\_C7.fcs

### Split 1: Petrol shading

### Split 2: Green shading

### Split 3: Violet shading

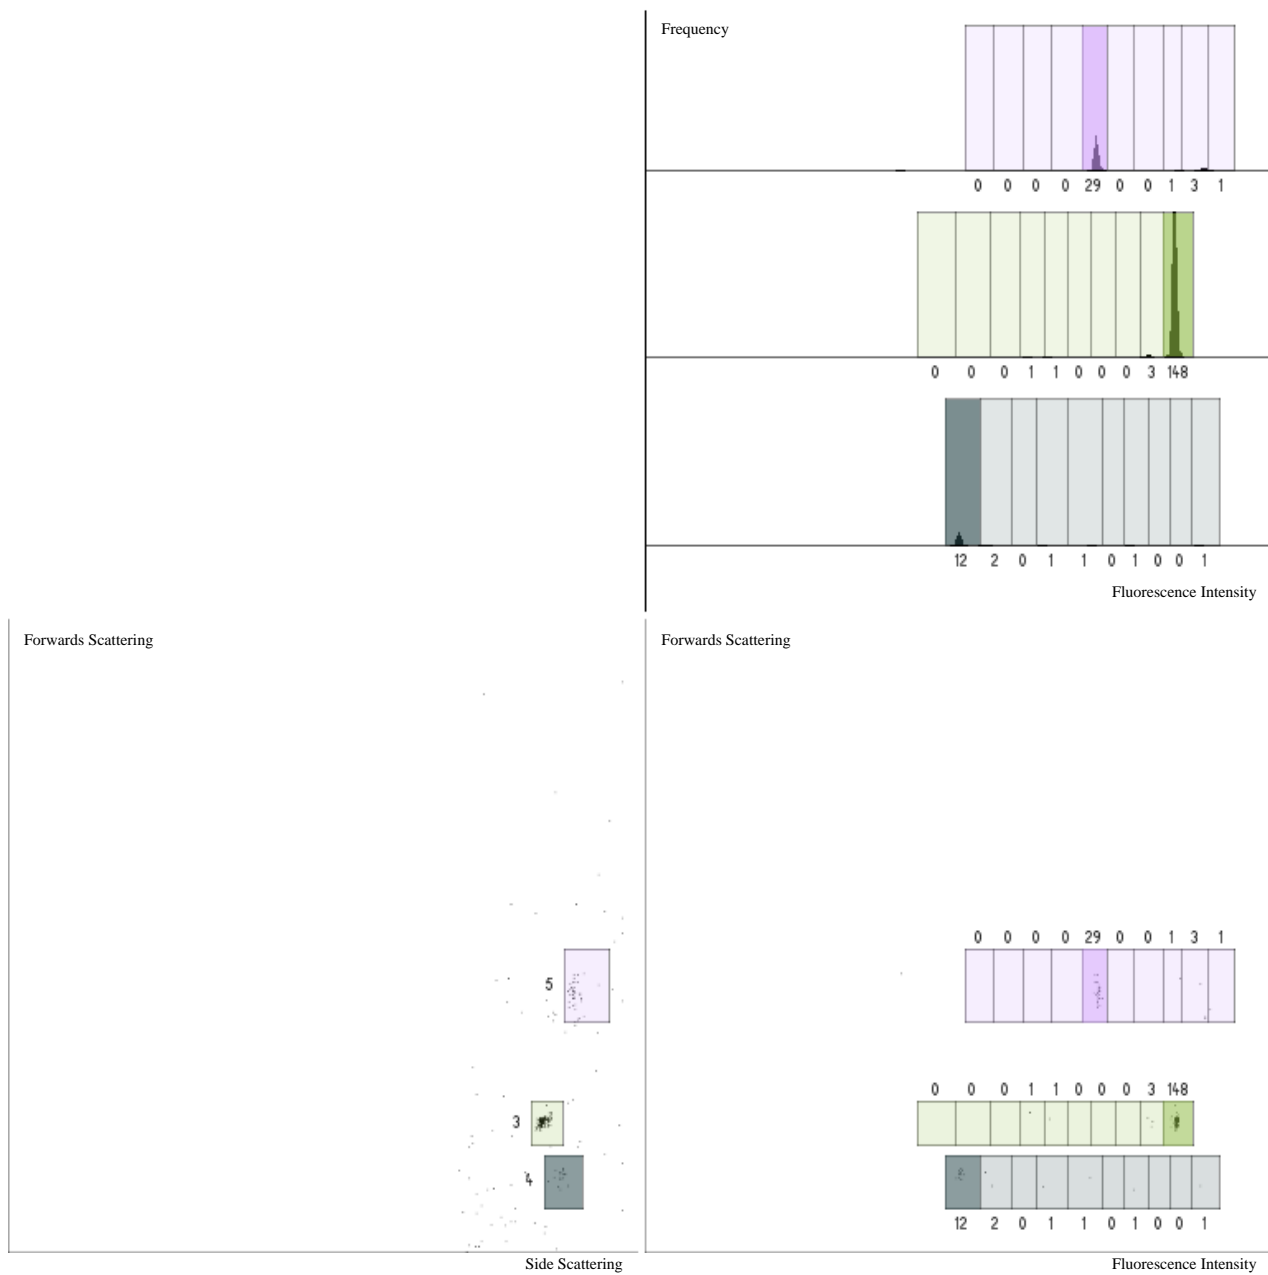

ANNEX 3: TAG DECONVOLUTION - BEAD 37

Passes flow sorting criteria: Yes  
Passes tag deconvolution criteria: Yes  
Included in protocol analysis: Yes  
Protocol: 4, 6, 2, 1  
Filename: Bin1\_plateA0\_D4.fcs  
Split 1: Petrol shading  
Split 2: Green shading  
Split 3: Violet shading

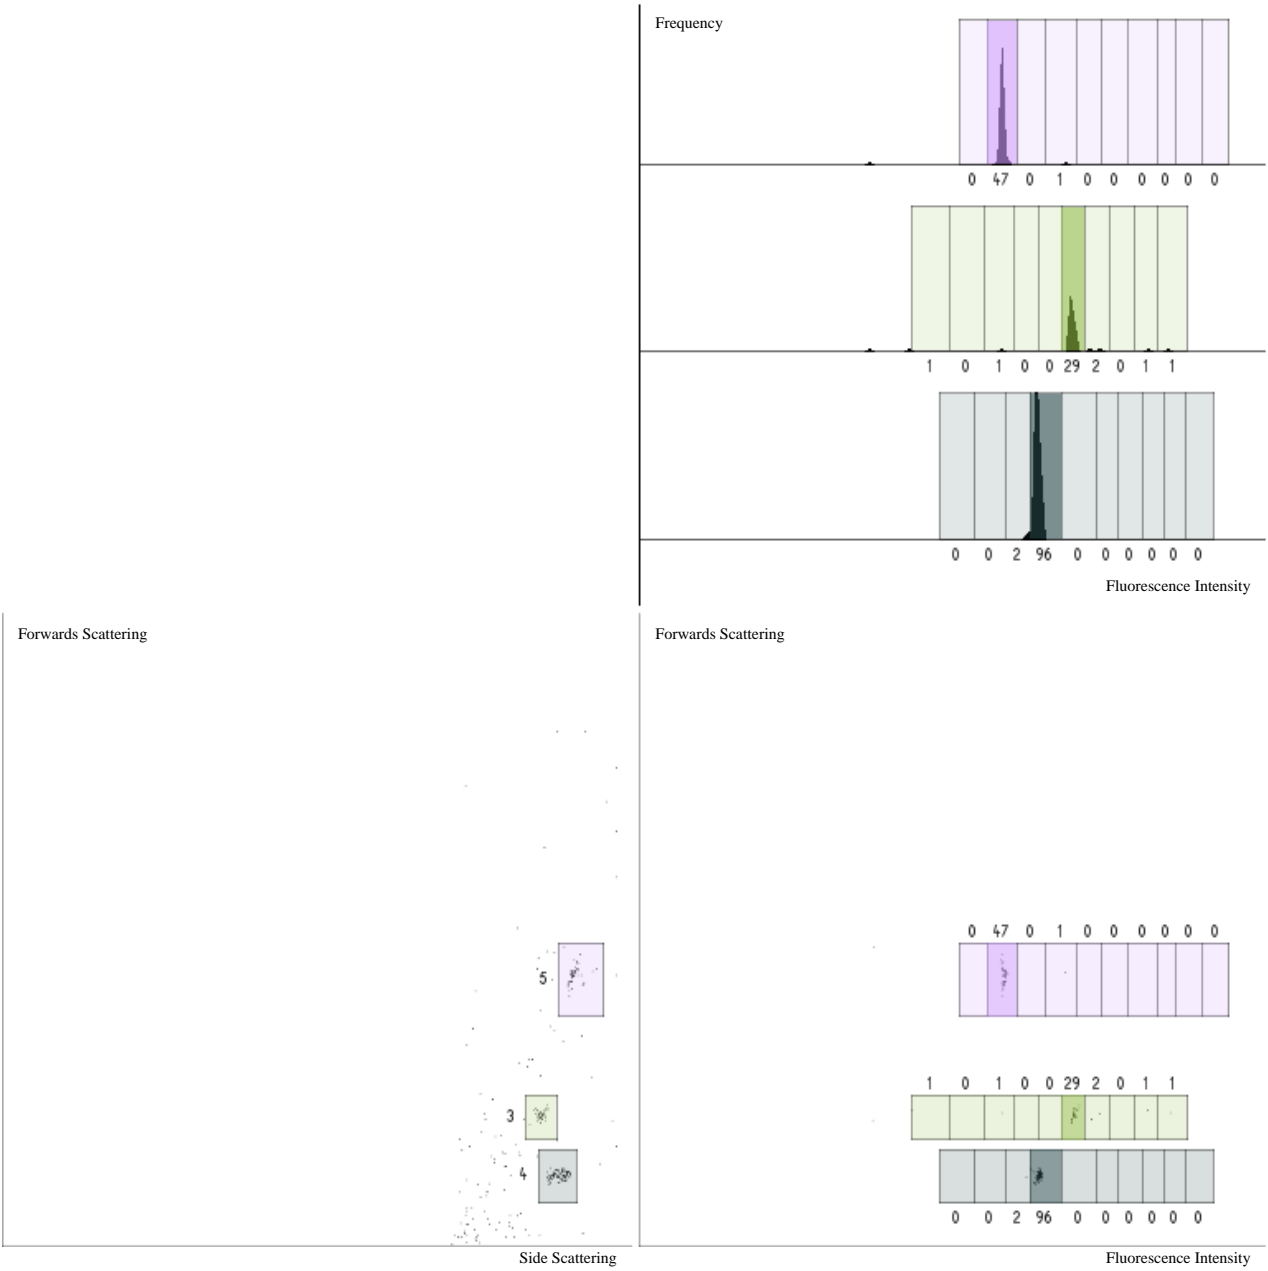

ANNEX 3: TAG DECONVOLUTION - BEAD 38

Passes flow sorting criteria: Yes  
Passes tag deconvolution criteria: Yes  
Included in protocol analysis: Yes  
Protocol: 8, 10, 8, 1  
Filename: Bin1\_plateA0\_D5.fcs  
Split 1: Petrol shading  
Split 2: Green shading  
Split 3: Violet shading

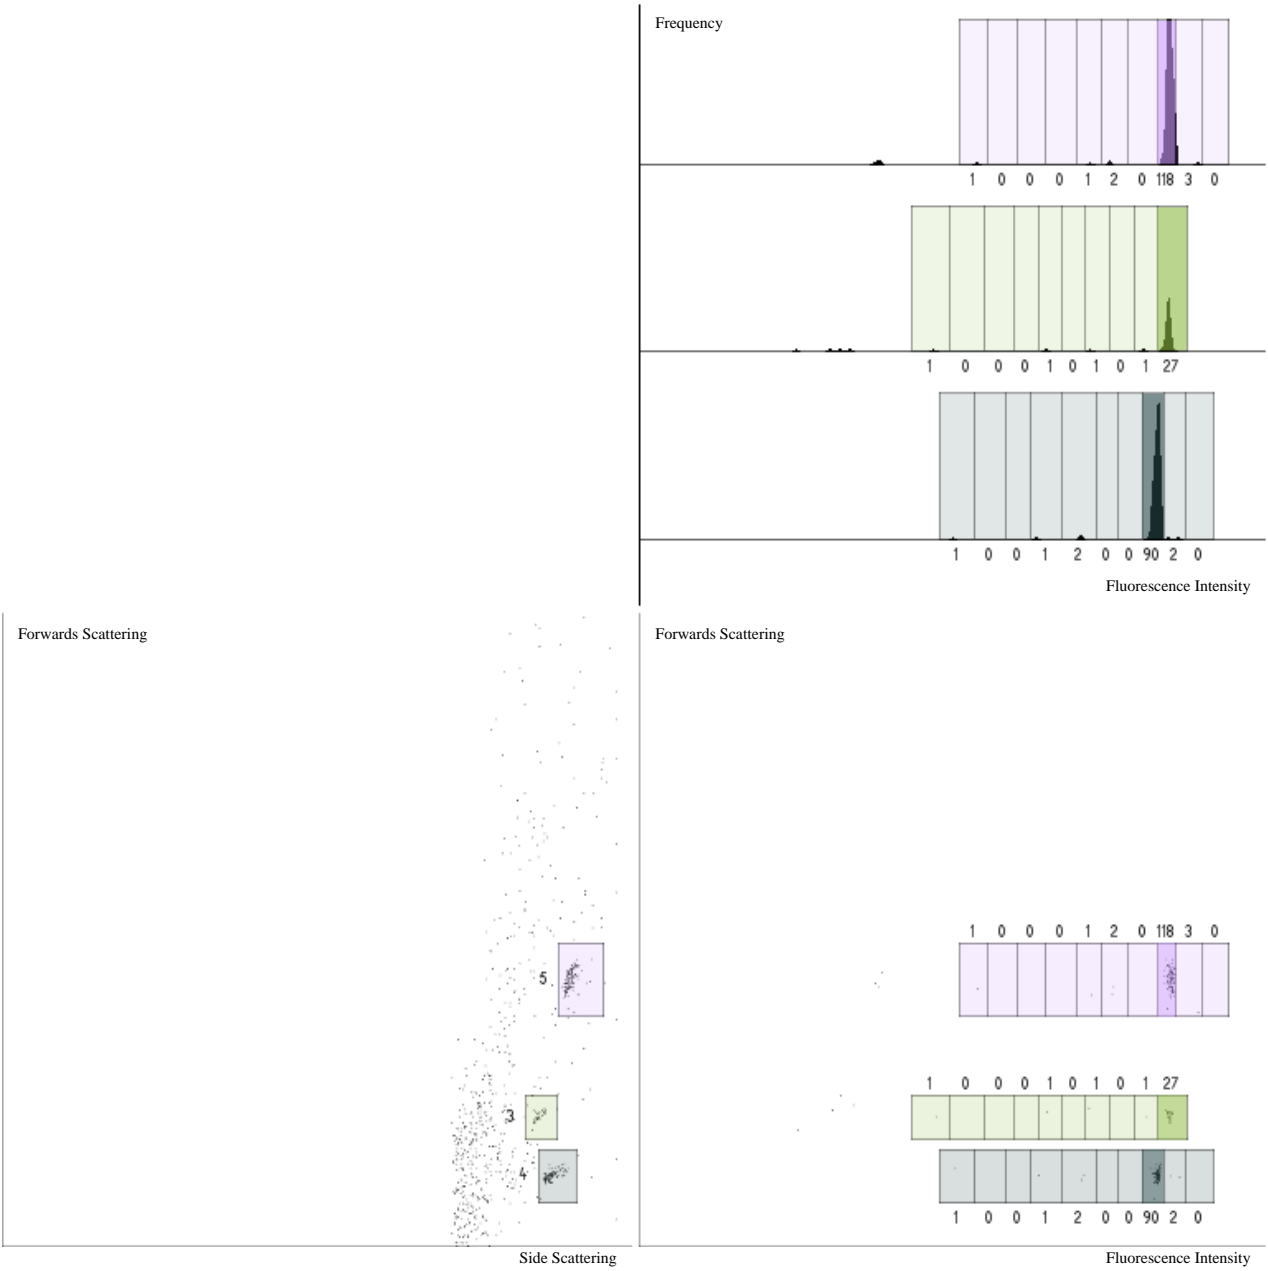



ANNEX 3: TAG DECONVOLUTION - BEAD 39

Passes flow sorting criteria: Yes  
Passes tag deconvolution criteria: No  
Included in protocol analysis: No  
Protocol: N/A  
Filename: Bin1\_plateA0\_D6.fcs  
Split 1: Petrol shading  
Split 2: Green shading  
Split 3: Violet shading

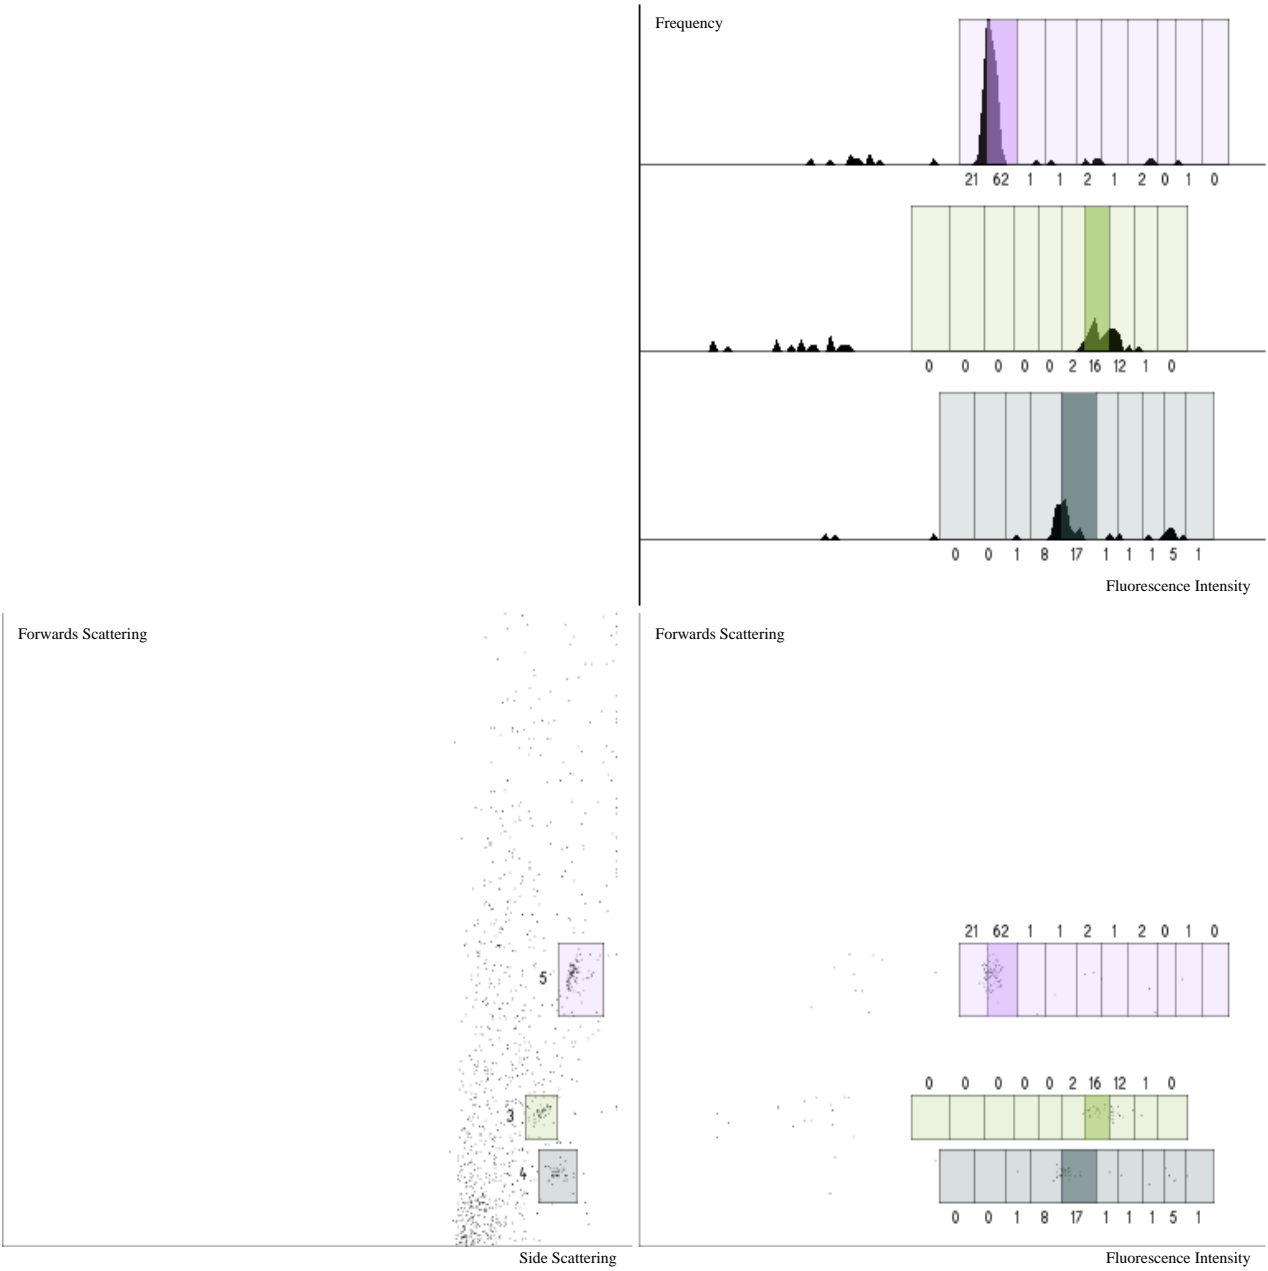

ANNEX 3: TAG DECONVOLUTION - BEAD 40

Passes flow sorting criteria: Yes  
Passes tag deconvolution criteria: Yes  
Included in protocol analysis: Yes  
Protocol: 5, 4, 5, 1  
Filename: Bin1\_plateA0\_D7.fcs  
Split 1: Petrol shading  
Split 2: Green shading  
Split 3: Violet shading

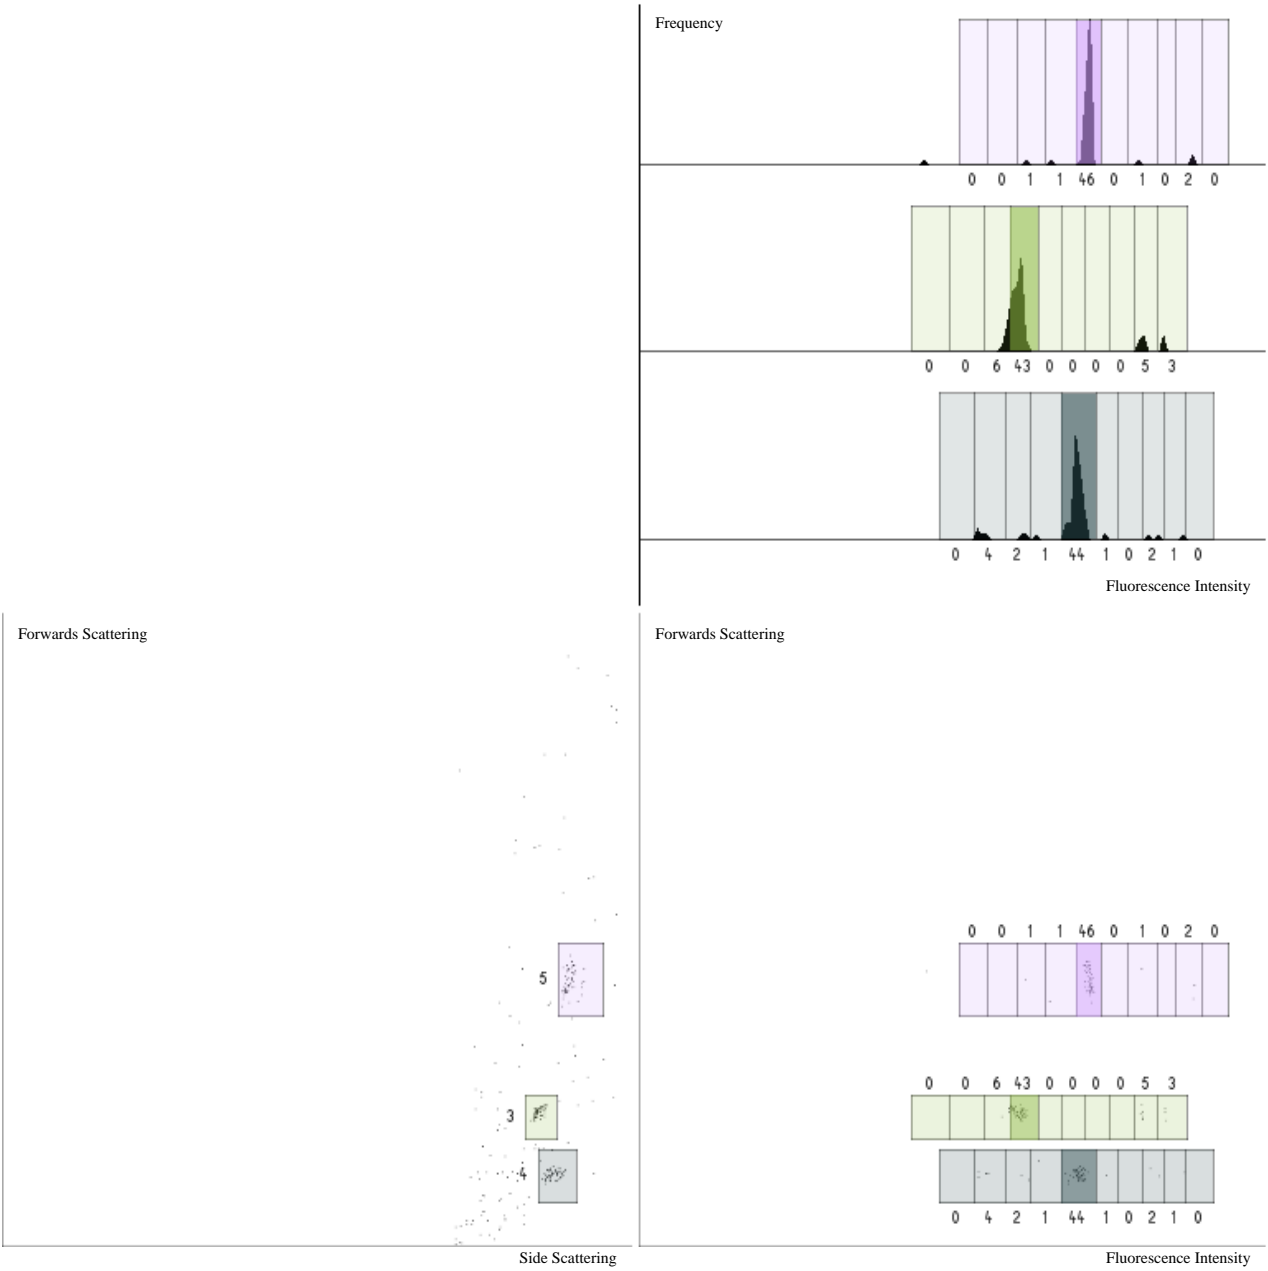

ANNEX 3: TAG DECONVOLUTION - BEAD 41

Passes flow sorting criteria: Yes  
Passes tag deconvolution criteria: No  
Included in protocol analysis: No  
Protocol: N/A  
Filename: Bin1\_plateA0\_E4.fcs  
Split 1: Petrol shading  
Split 2: Green shading  
Split 3: Violet shading

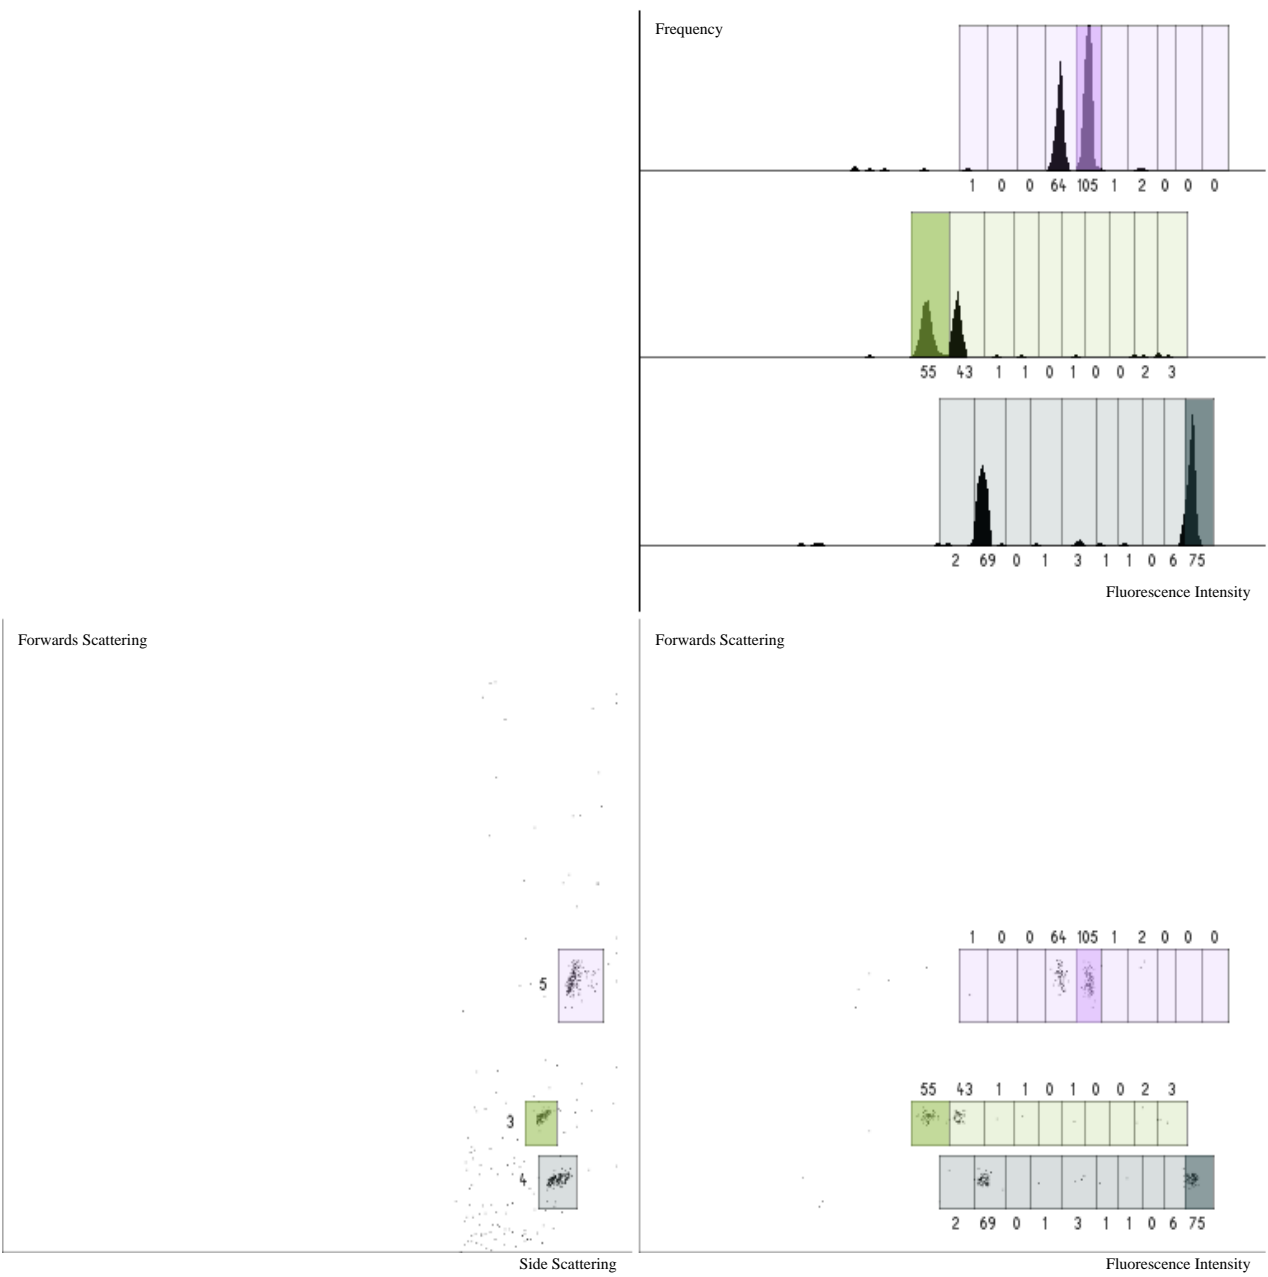

Passes flow sorting criteria: Yes  
 Passes tag deconvolution criteria: Yes  
 Included in protocol analysis: Yes  
 Protocol: 2, 1, 5, 1  
 Filename: Bin1\_plateA0\_E5.fcs  
 Split 1: Petrol shading  
 Split 2: Green shading  
 Split 3: Violet shading

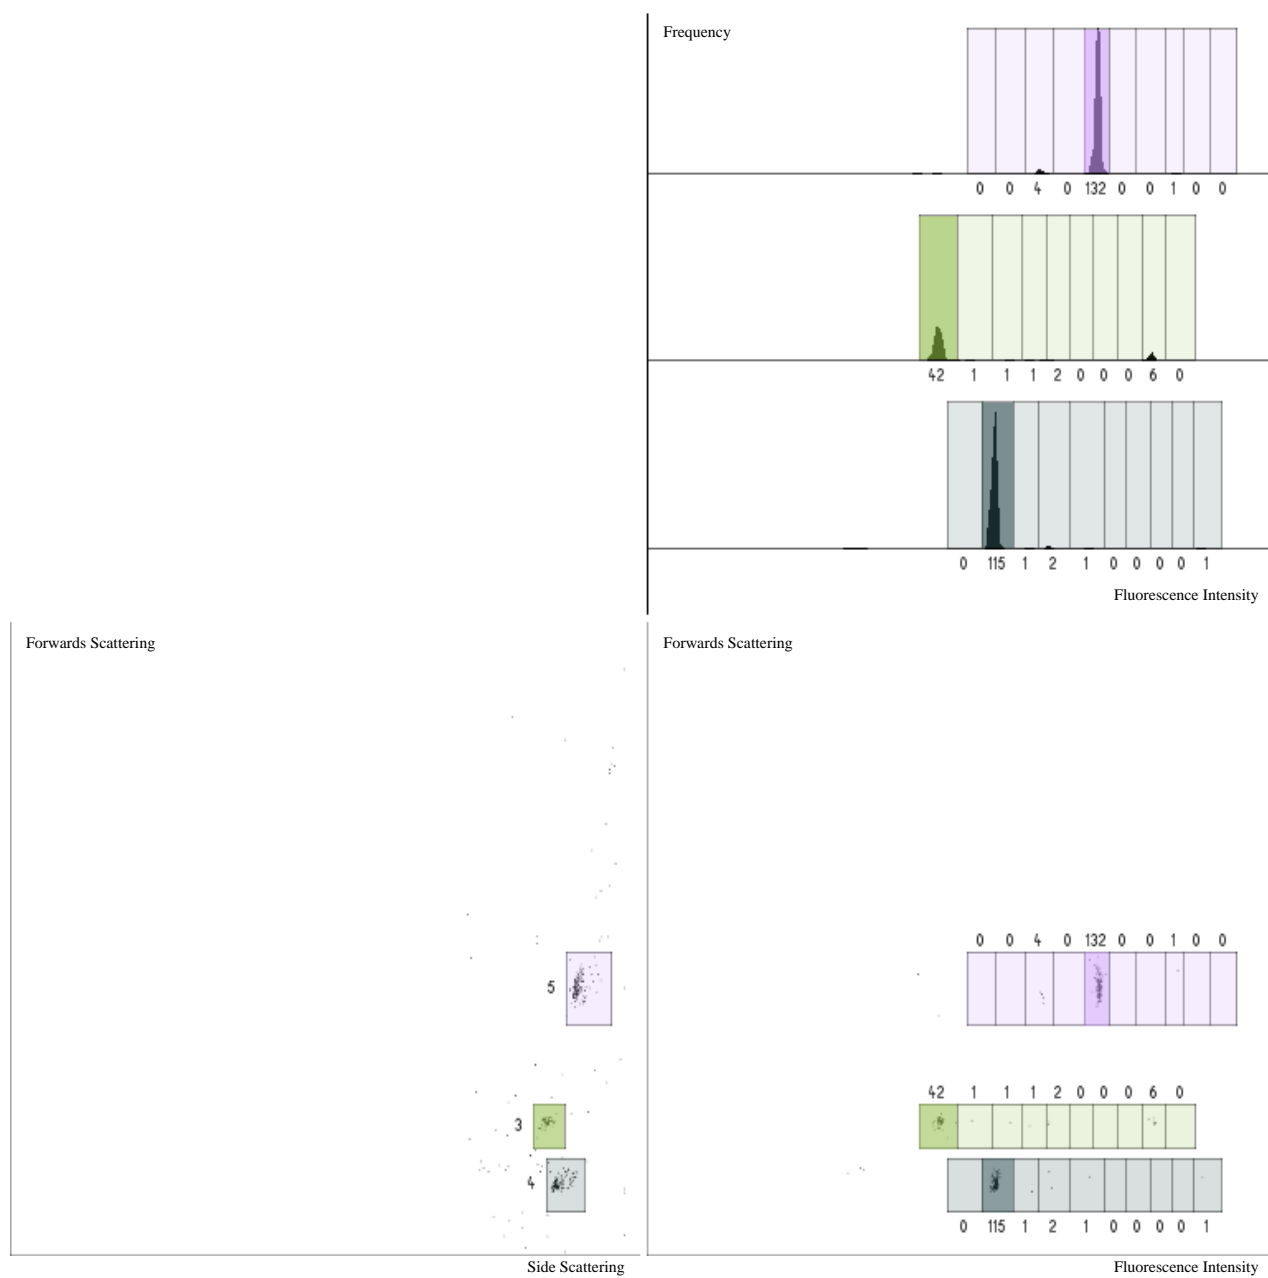

Passes flow sorting criteria: Yes  
 Passes tag deconvolution criteria: No  
 Included in protocol analysis: No  
 Protocol: N/A  
 Filename: Bin1\_plateA0\_E6.fcs  
 Split 1: Petrol shading  
 Split 2: Green shading  
 Split 3: Violet shading

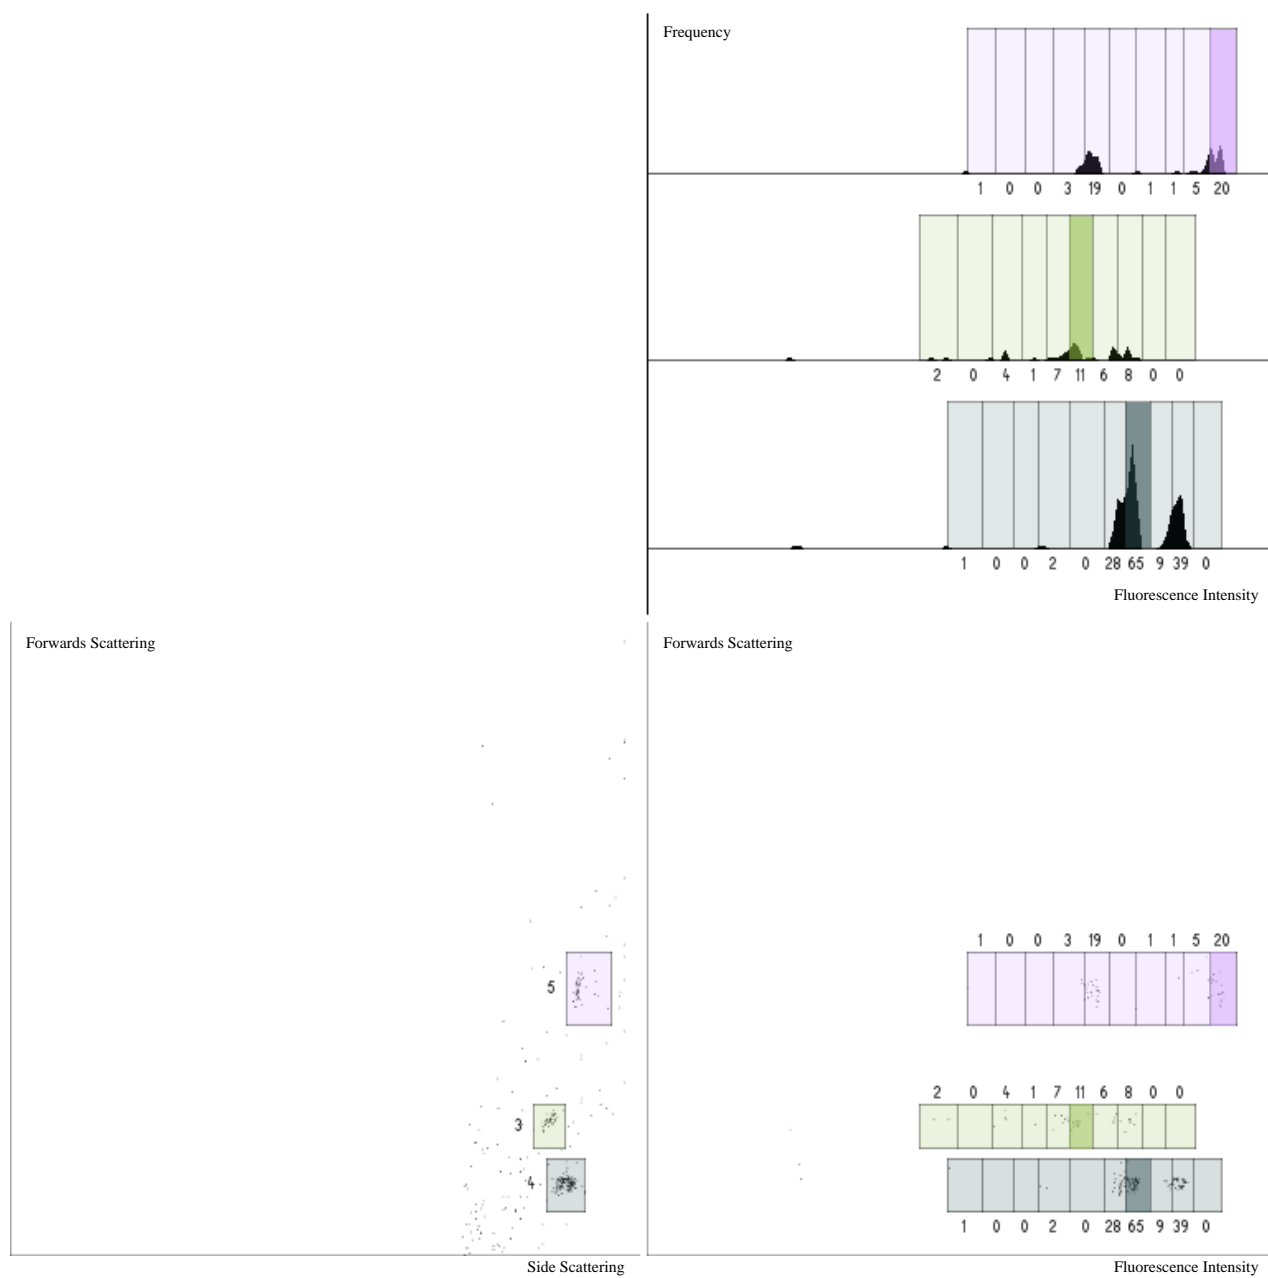

ANNEX 3: TAG DECONVOLUTION - BEAD 44

Passes flow sorting criteria: Yes  
Passes tag deconvolution criteria: No  
Included in protocol analysis: No  
Protocol: N/A  
Filename: Bin1\_plateA0\_F5.fcs  
Split 1: Petrol shading  
Split 2: Green shading  
Split 3: Violet shading

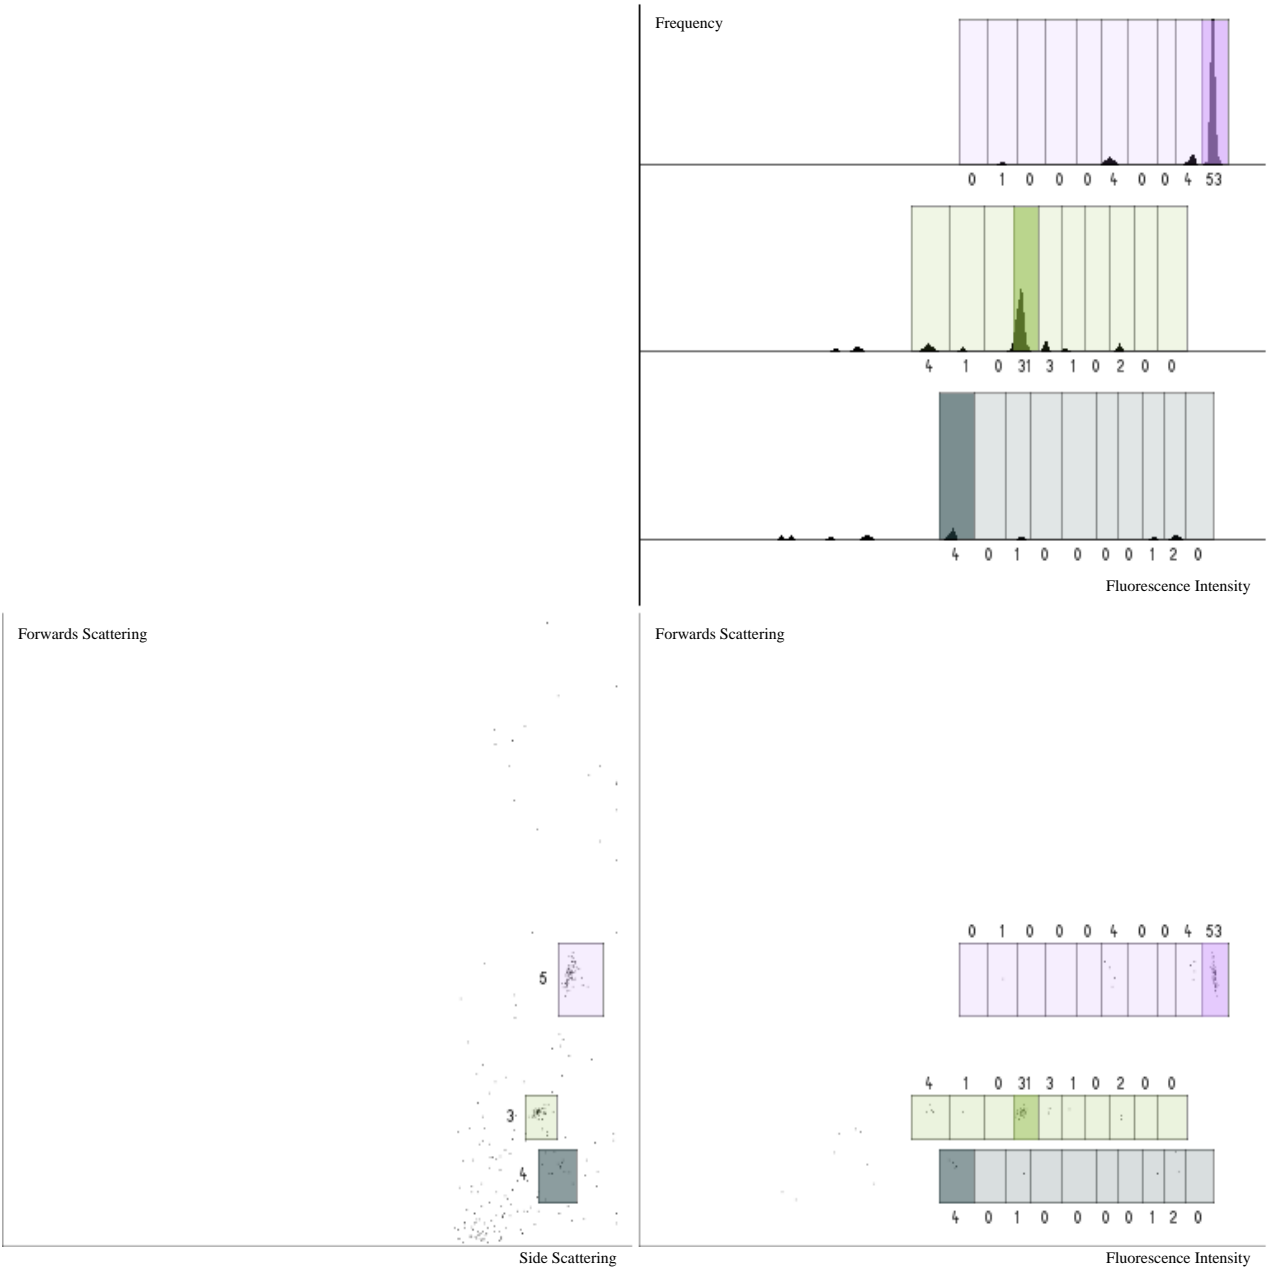

ANNEX 3: TAG DECONVOLUTION - BEAD 45

Passes flow sorting criteria: Yes  
Passes tag deconvolution criteria: Yes  
Included in protocol analysis: Yes  
Protocol: 1, 3, 6, 1  
Filename: Bin1\_plateA0\_F6.fcs  
Split 1: Petrol shading  
Split 2: Green shading  
Split 3: Violet shading

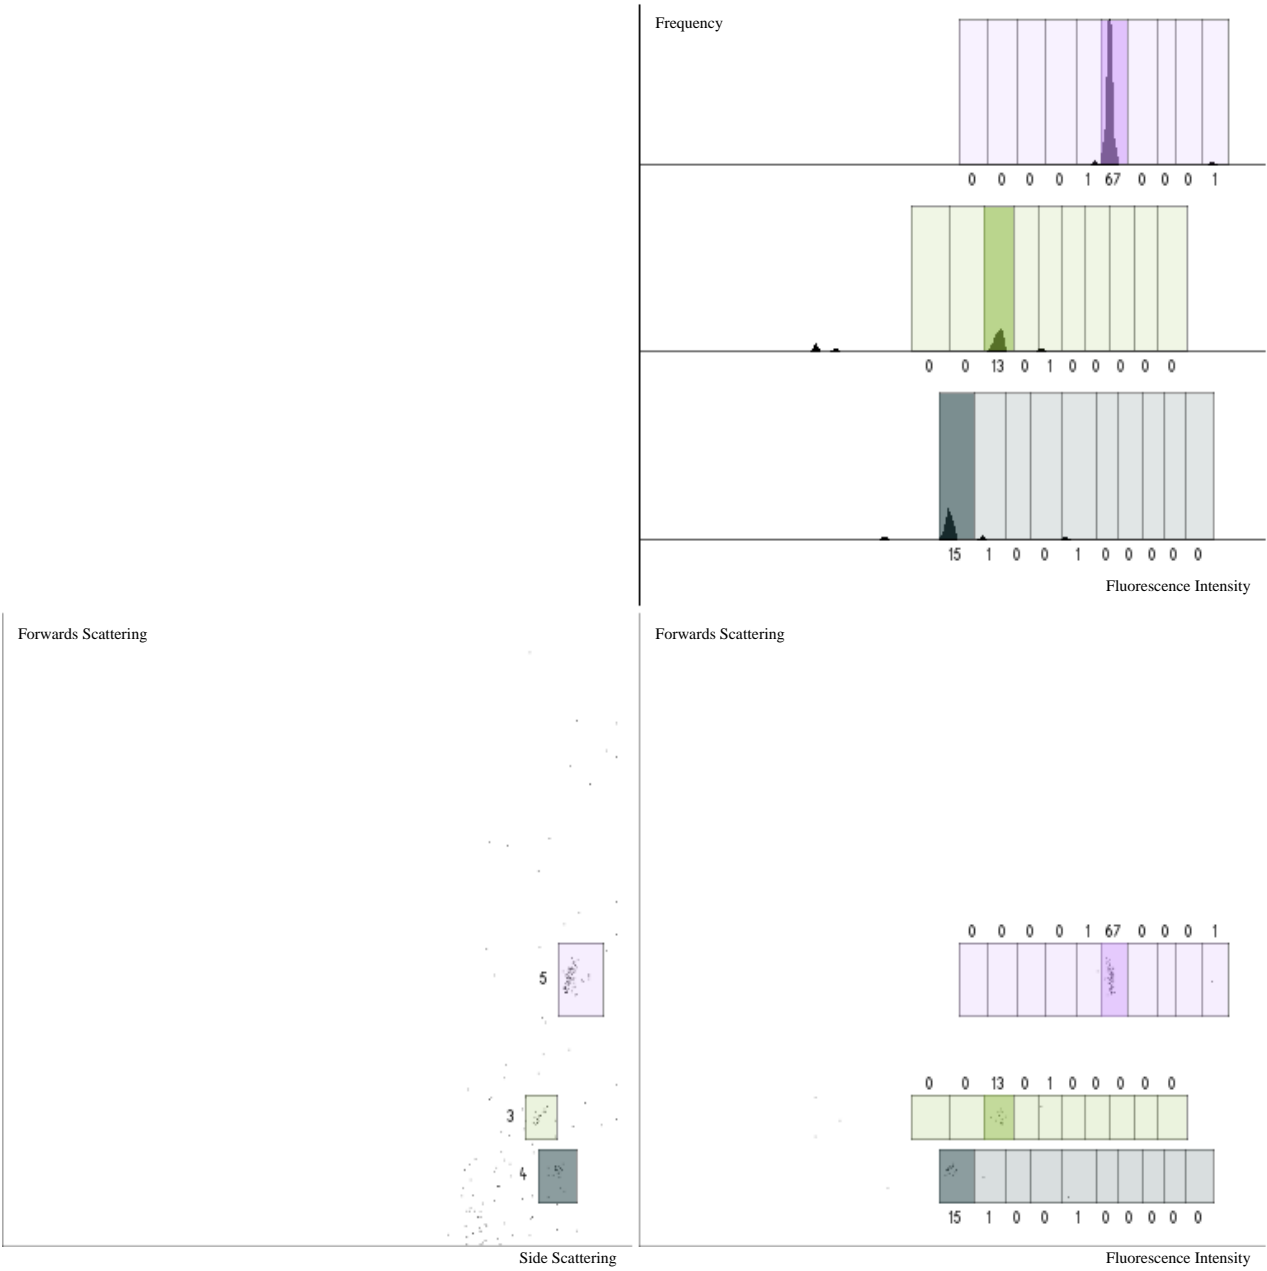

ANNEX 3: TAG DECONVOLUTION - BEAD 46

Passes flow sorting criteria: Yes  
Passes tag deconvolution criteria: Yes  
Included in protocol analysis: Yes  
Protocol: 5, 10, 5, 1  
Filename: Bin1\_plateA0\_G4.fcs  
Split 1: Petrol shading  
Split 2: Green shading  
Split 3: Violet shading

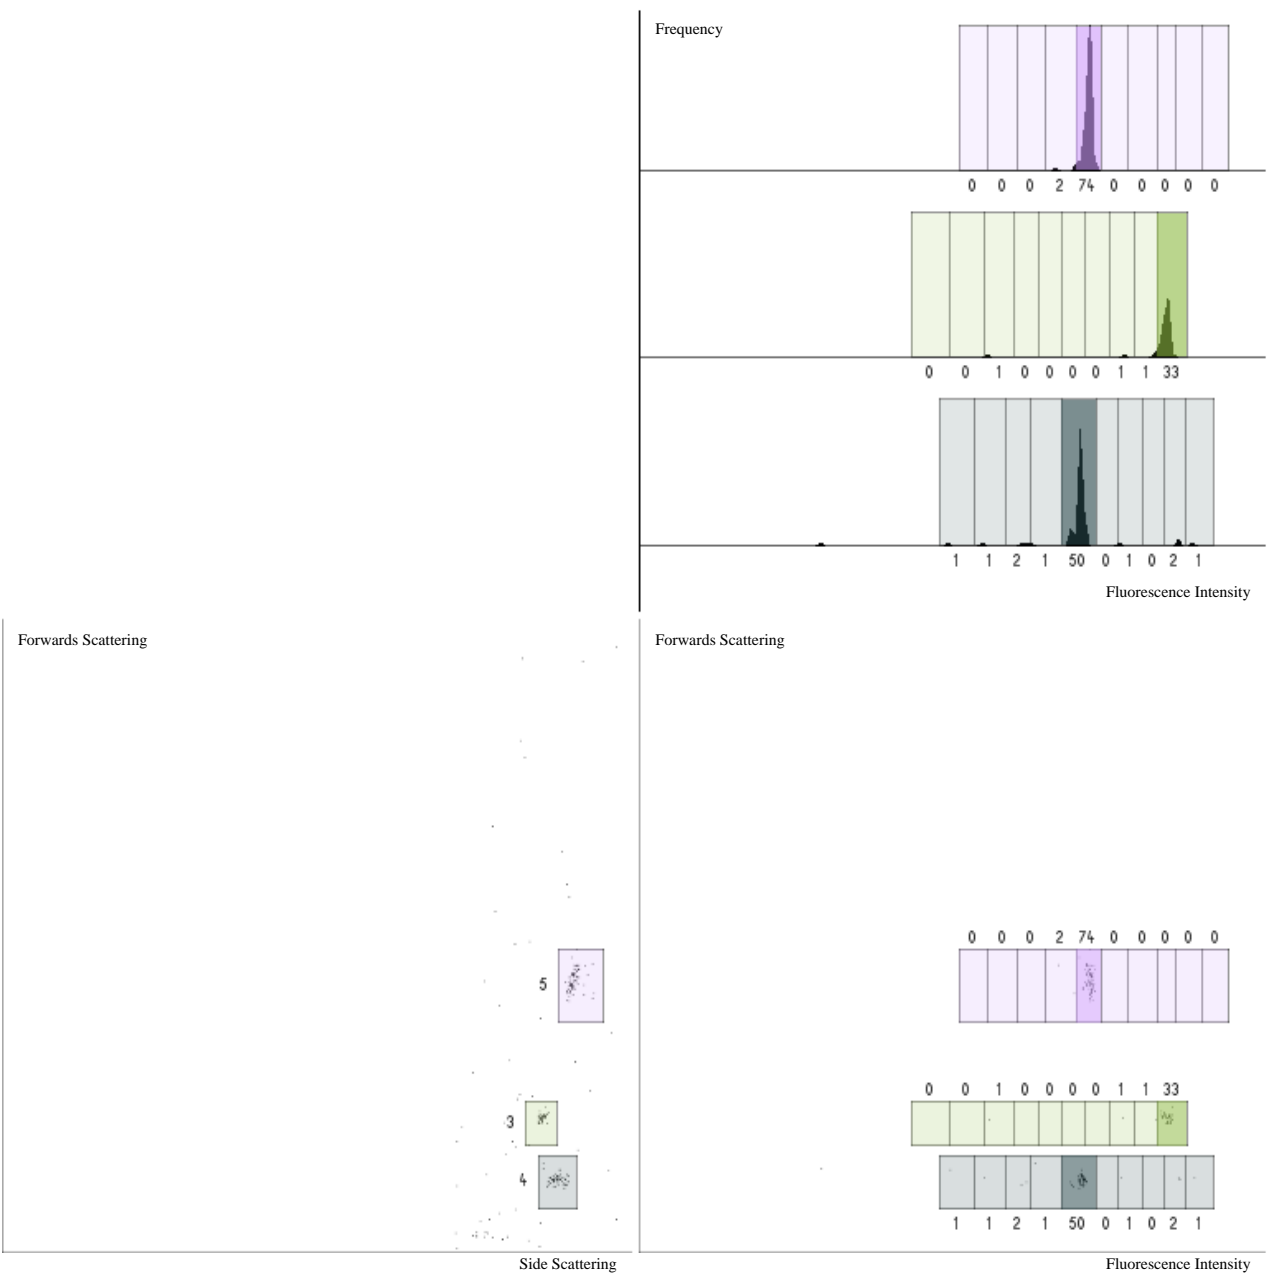



ANNEX 3: TAG DECONVOLUTION - BEAD 47

Passes flow sorting criteria: Yes  
Passes tag deconvolution criteria: No  
Included in protocol analysis: No  
Protocol: N/A  
Filename: Bin1\_plateA0\_G5.fcs  
Split 1: Petrol shading  
Split 2: Green shading  
Split 3: Violet shading

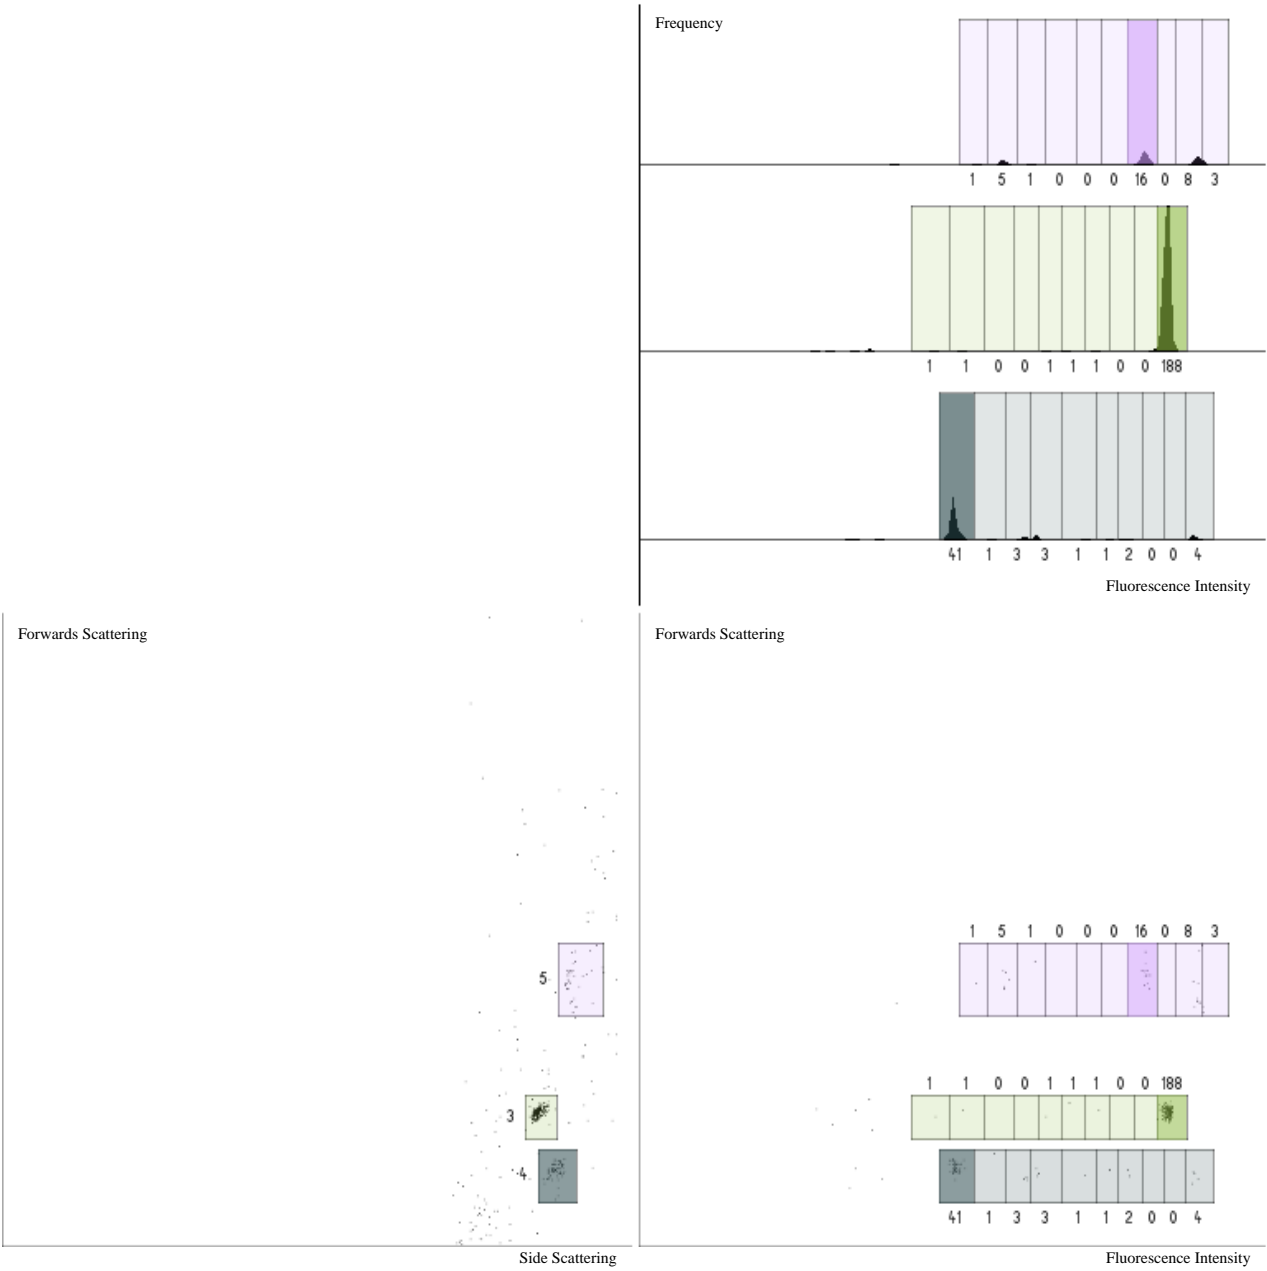

ANNEX 3: TAG DECONVOLUTION - BEAD 48

Passes flow sorting criteria: Yes  
Passes tag deconvolution criteria: Yes  
Included in protocol analysis: Yes  
Protocol: 3, 1, 10, 1  
Filename: Bin1\_plateA0\_G6.fcs  
Split 1: Petrol shading  
Split 2: Green shading  
Split 3: Violet shading

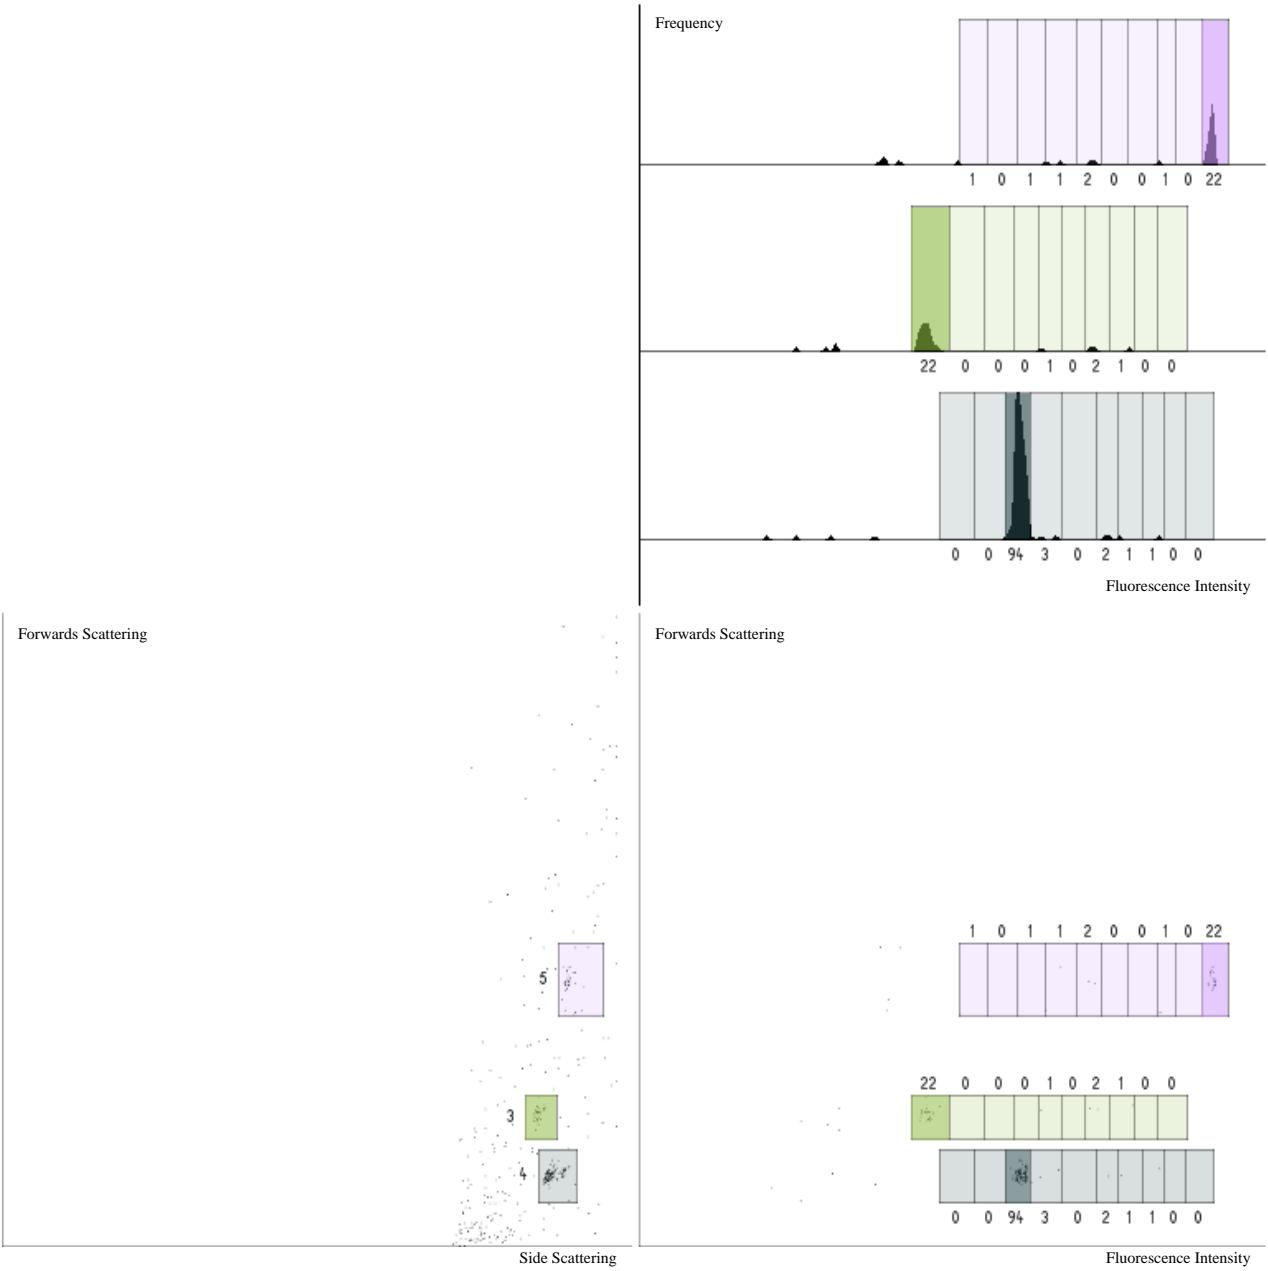

ANNEX 3: TAG DECONVOLUTION - BEAD 49

Passes flow sorting criteria: Yes  
Passes tag deconvolution criteria: No  
Included in protocol analysis: No  
Protocol: N/A  
Filename: Bin1\_plateA0\_H4.fcs  
Split 1: Petrol shading  
Split 2: Green shading  
Split 3: Violet shading

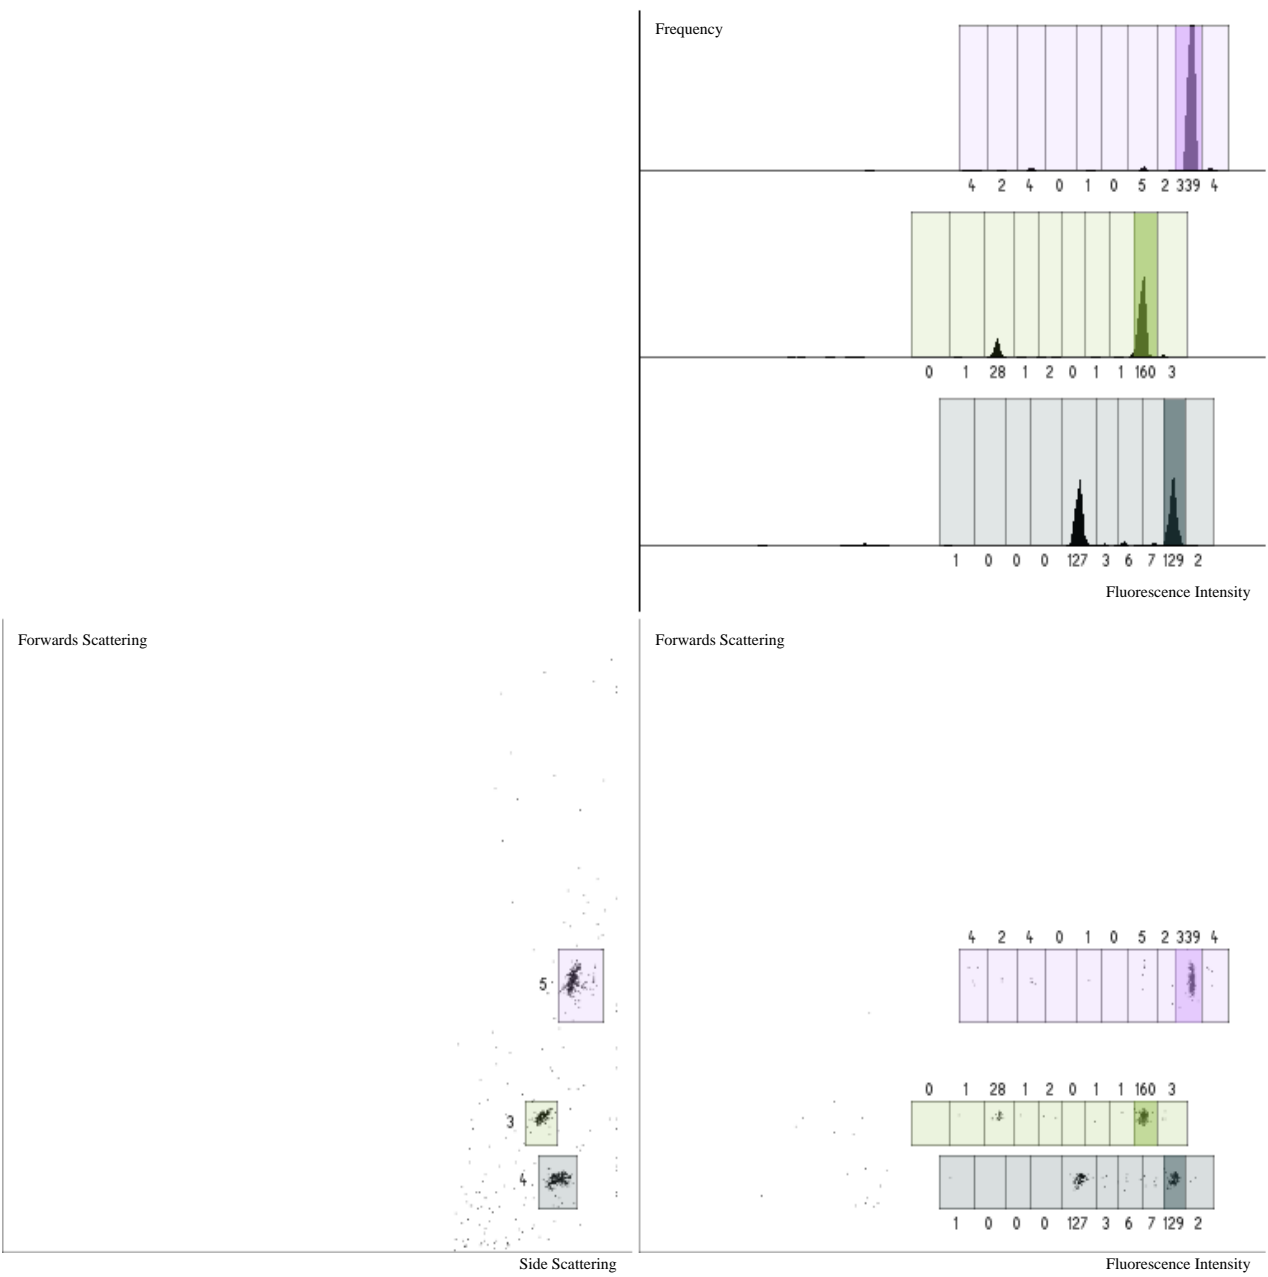

ANNEX 3: TAG DECONVOLUTION - BEAD 50

Passes flow sorting criteria: Yes  
Passes tag deconvolution criteria: Yes  
Included in protocol analysis: Yes  
Protocol: 9, 5, 8, 1  
Filename: Bin1\_plateA0\_H5.fcs  
Split 1: Petrol shading  
Split 2: Green shading  
Split 3: Violet shading

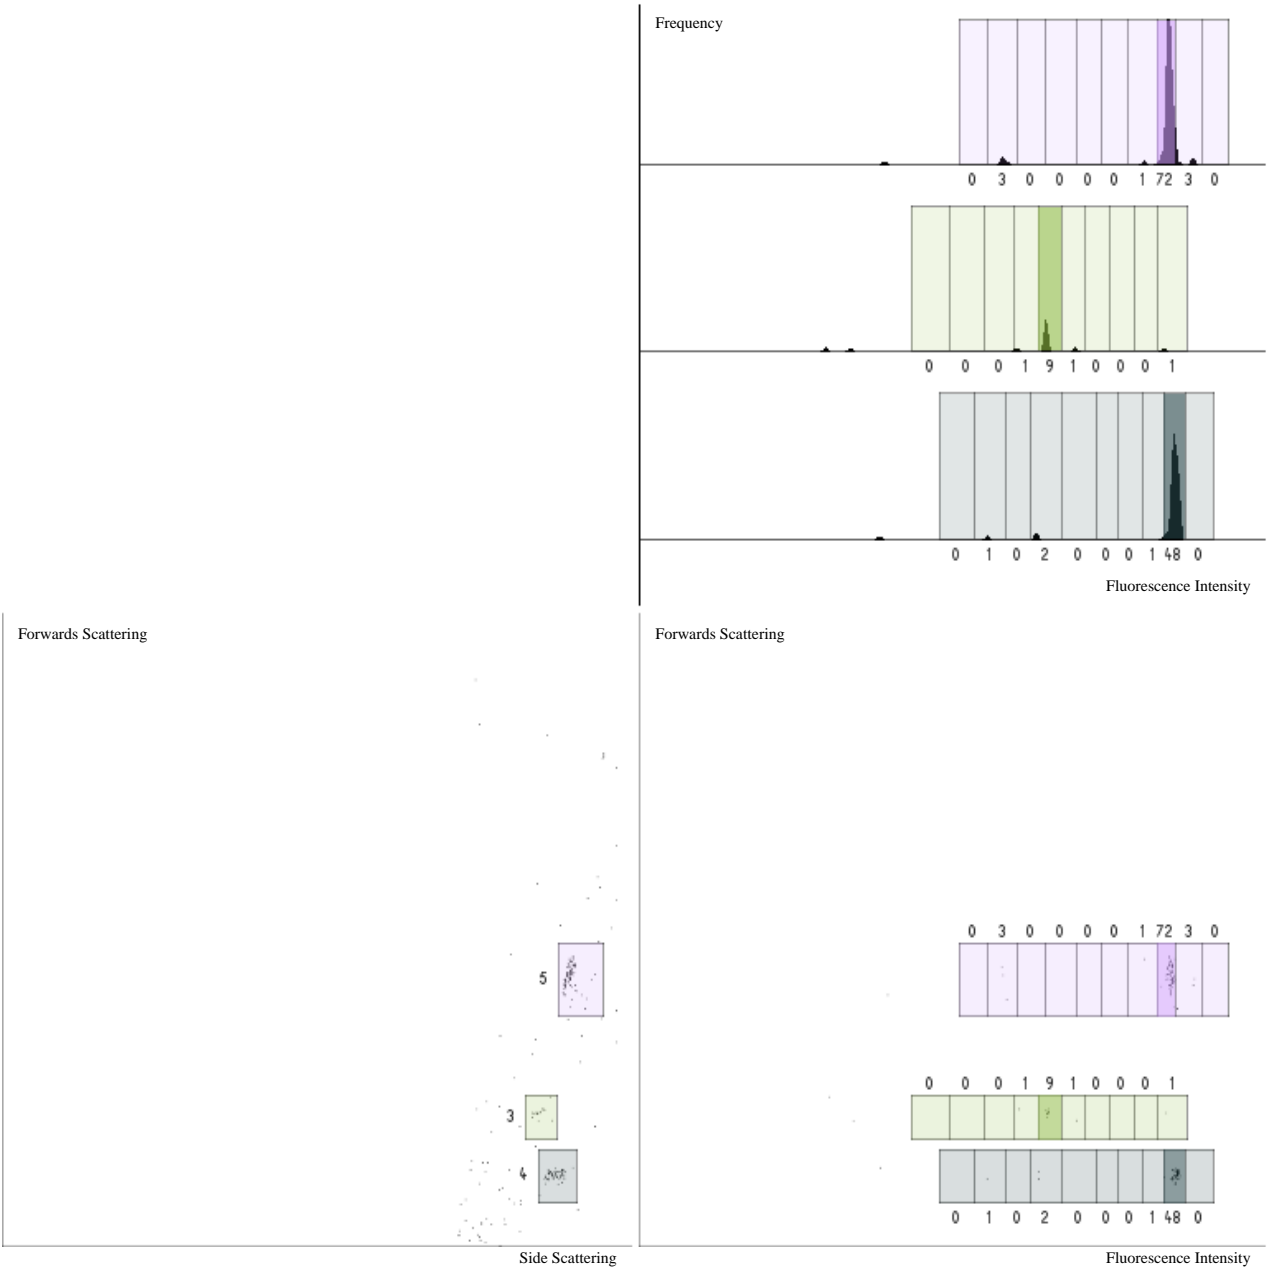

ANNEX 3: TAG DECONVOLUTION - BEAD 51

Passes flow sorting criteria: Yes  
Passes tag deconvolution criteria: Yes  
Included in protocol analysis: Yes  
Protocol: 9, 1, 7, 1  
Filename: Bin1\_plateA0\_H10.fcs  
Split 1: Petrol shading  
Split 2: Green shading  
Split 3: Violet shading

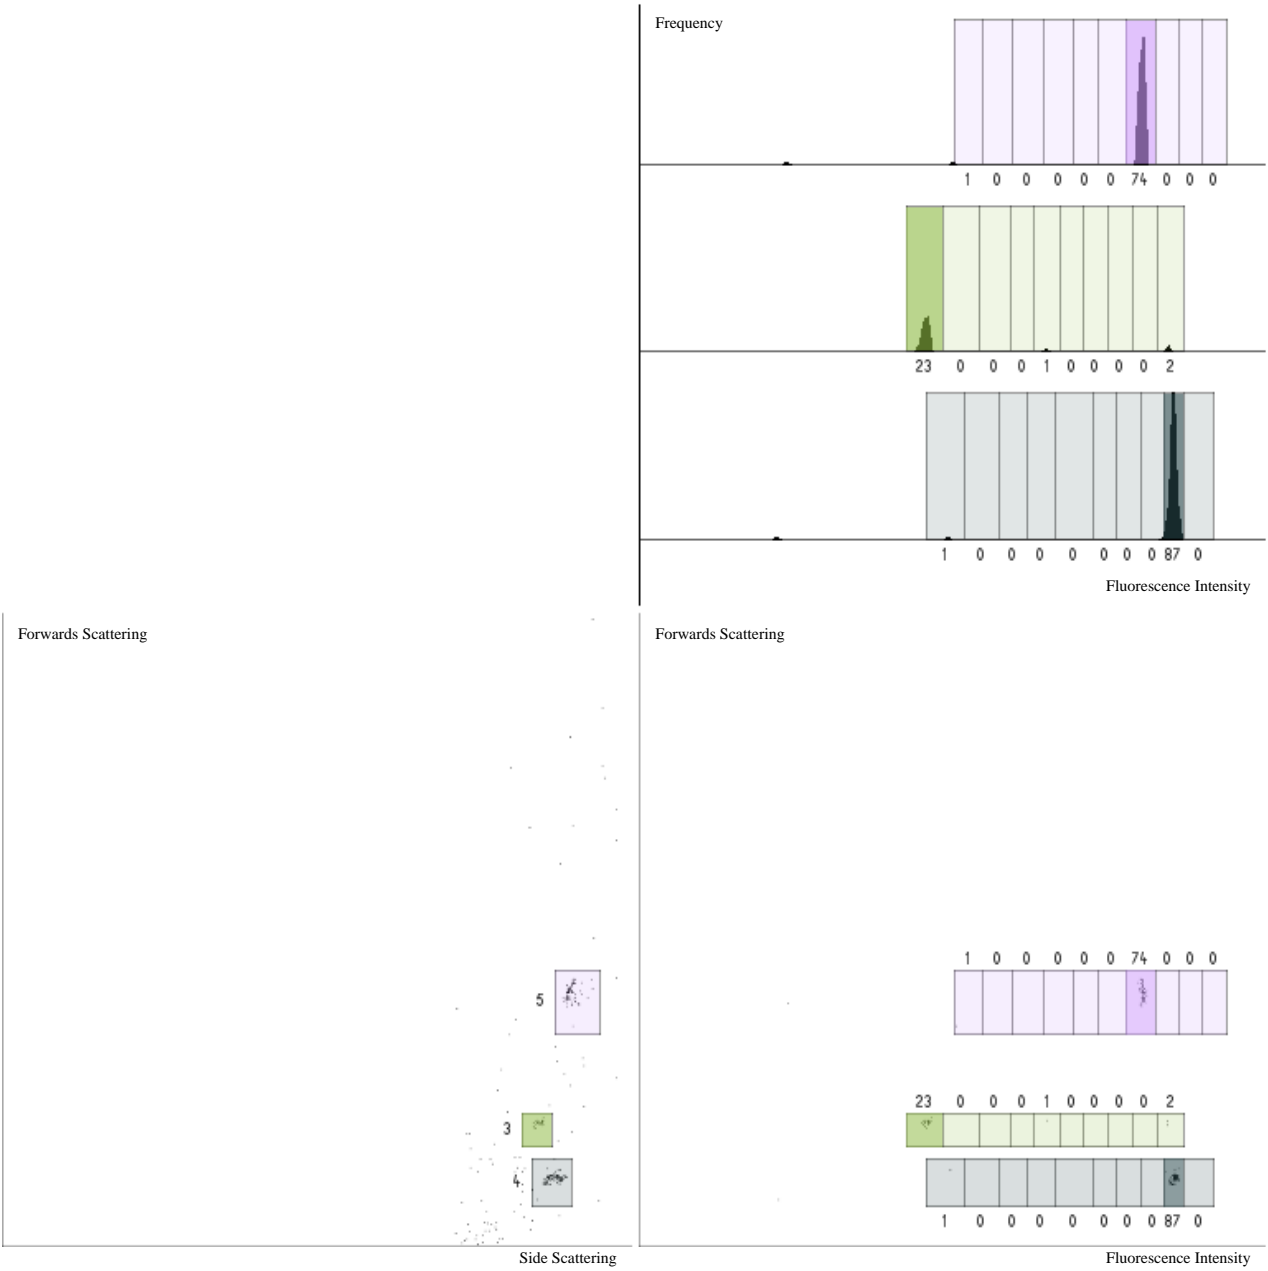

ANNEX 3: TAG DECONVOLUTION - BEAD 52

Passes flow sorting criteria: Yes  
Passes tag deconvolution criteria: Yes  
Included in protocol analysis: Yes  
Protocol: 6, 4, 7, 1  
Filename: Bin1\_plateA0\_A8.fcs  
Split 1: Petrol shading  
Split 2: Green shading  
Split 3: Violet shading

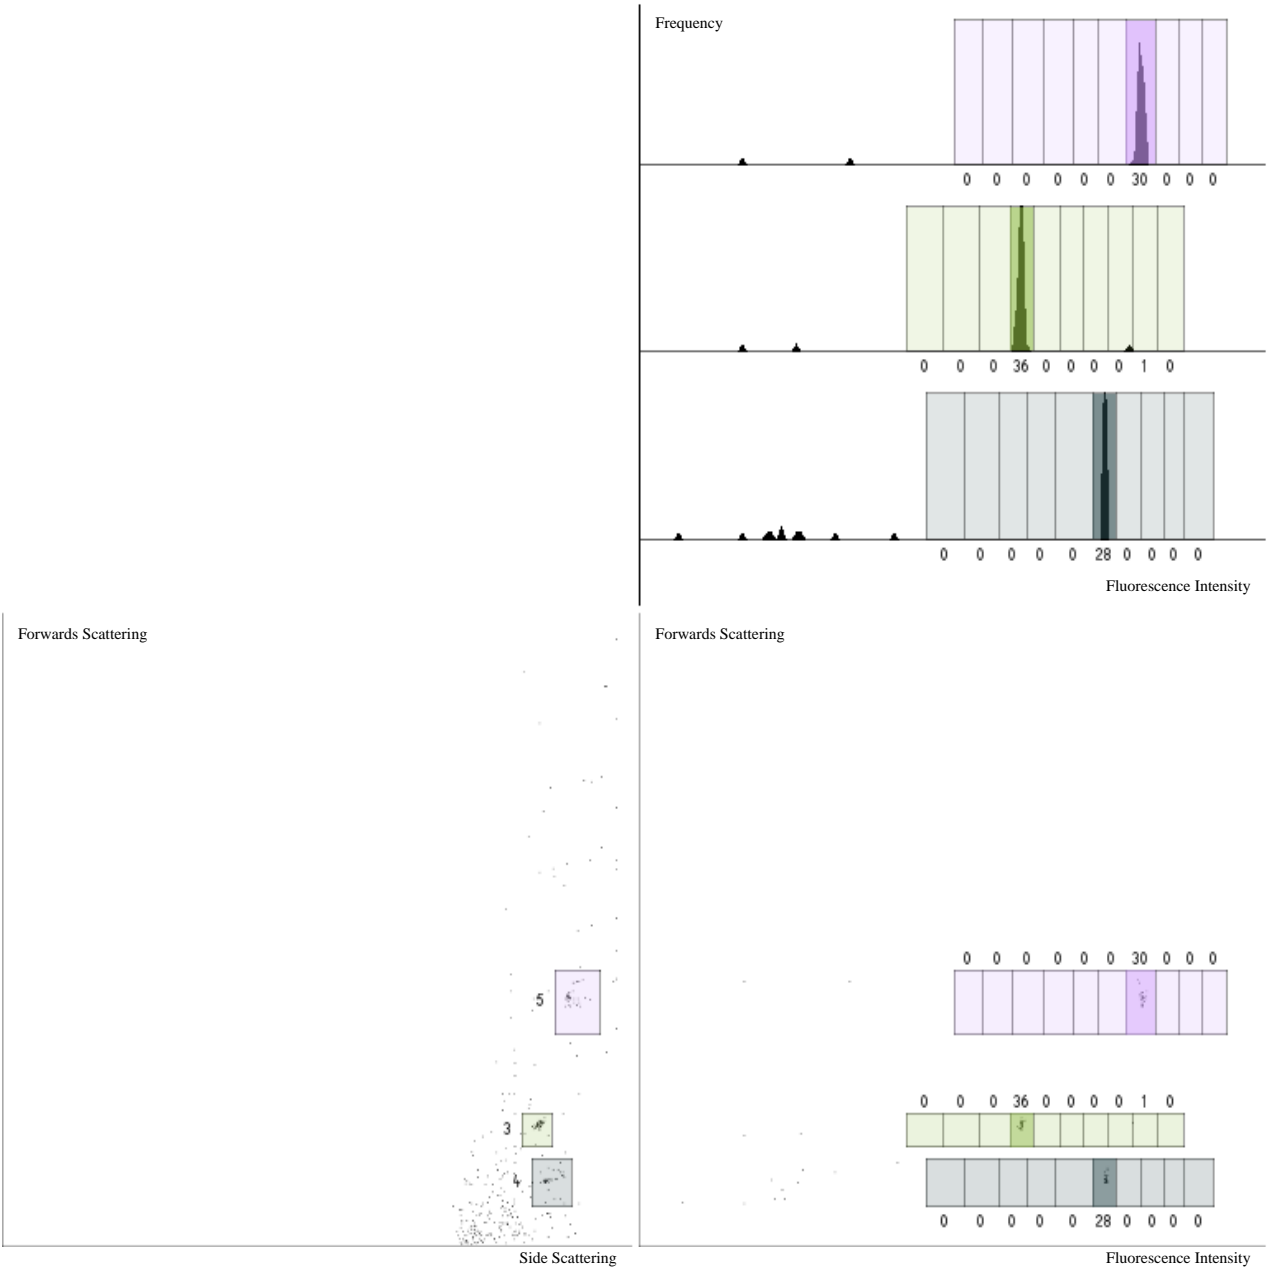

ANNEX 3: TAG DECONVOLUTION - BEAD 53

Passes flow sorting criteria: Yes  
Passes tag deconvolution criteria: Yes  
Included in protocol analysis: Yes  
Protocol: 9, 3, 7, 1  
Filename: Bin1\_plateA0\_A9.fcs  
Split 1: Petrol shading  
Split 2: Green shading  
Split 3: Violet shading

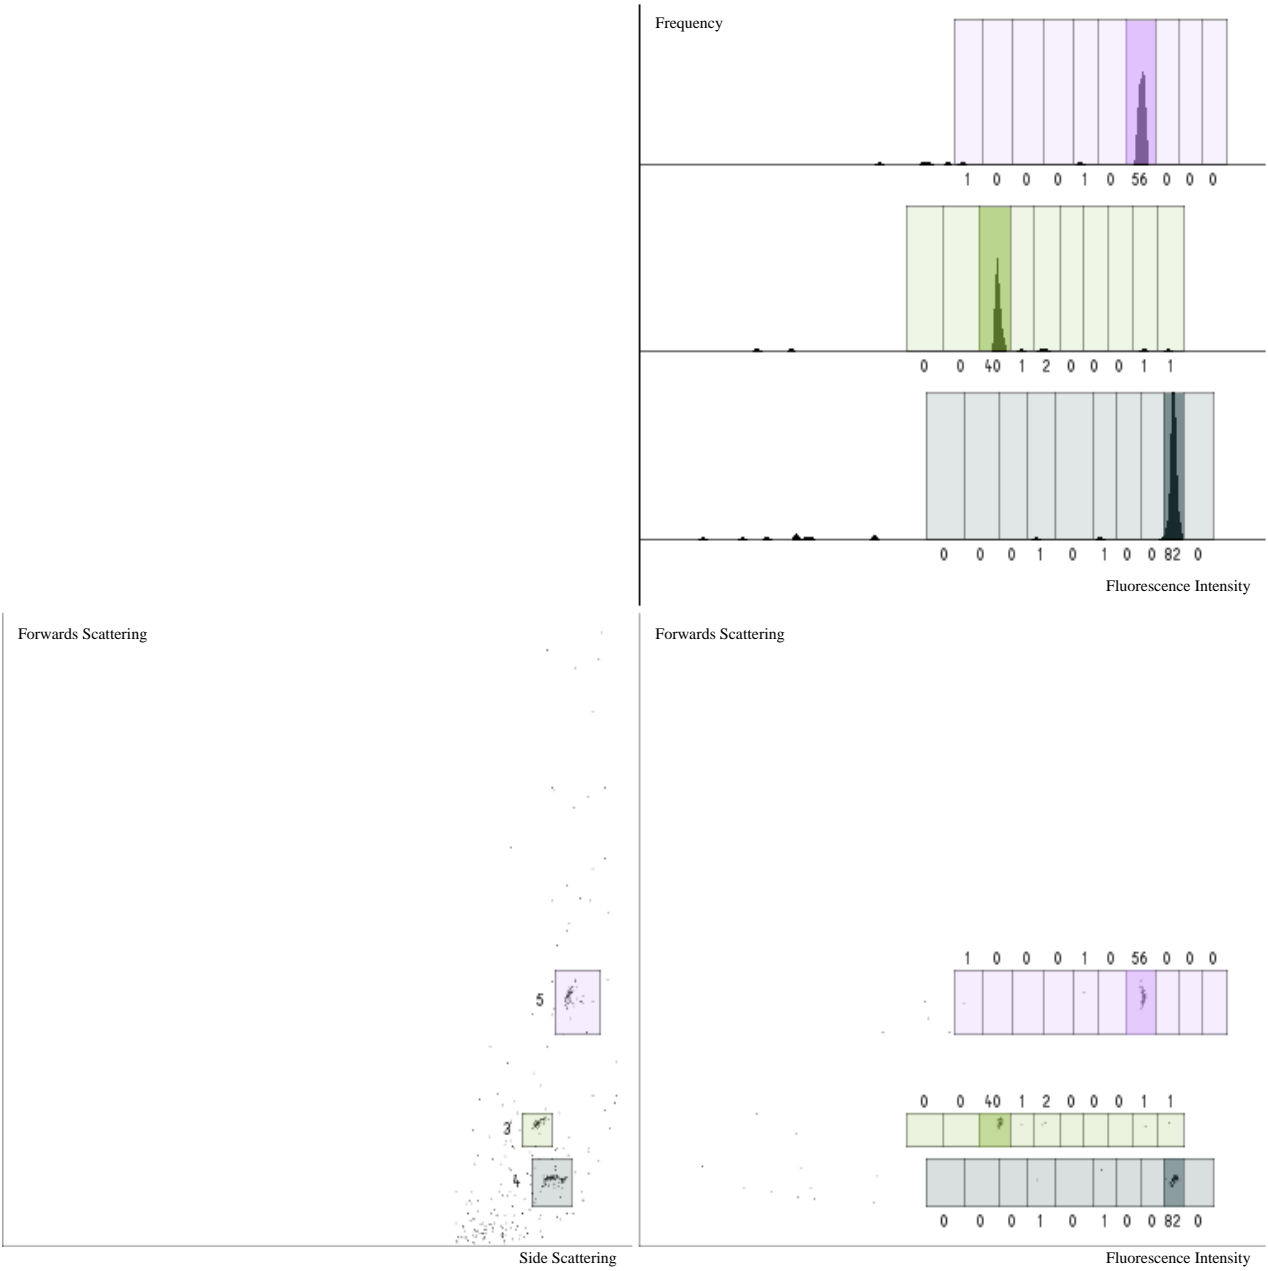

ANNEX 3: TAG DECONVOLUTION - BEAD 54

Passes flow sorting criteria: Yes  
Passes tag deconvolution criteria: Yes  
Included in protocol analysis: Yes  
Protocol: 2, 5, 3, 1  
Filename: Bin1\_plateA0\_A10.fcs  
Split 1: Petrol shading  
Split 2: Green shading  
Split 3: Violet shading

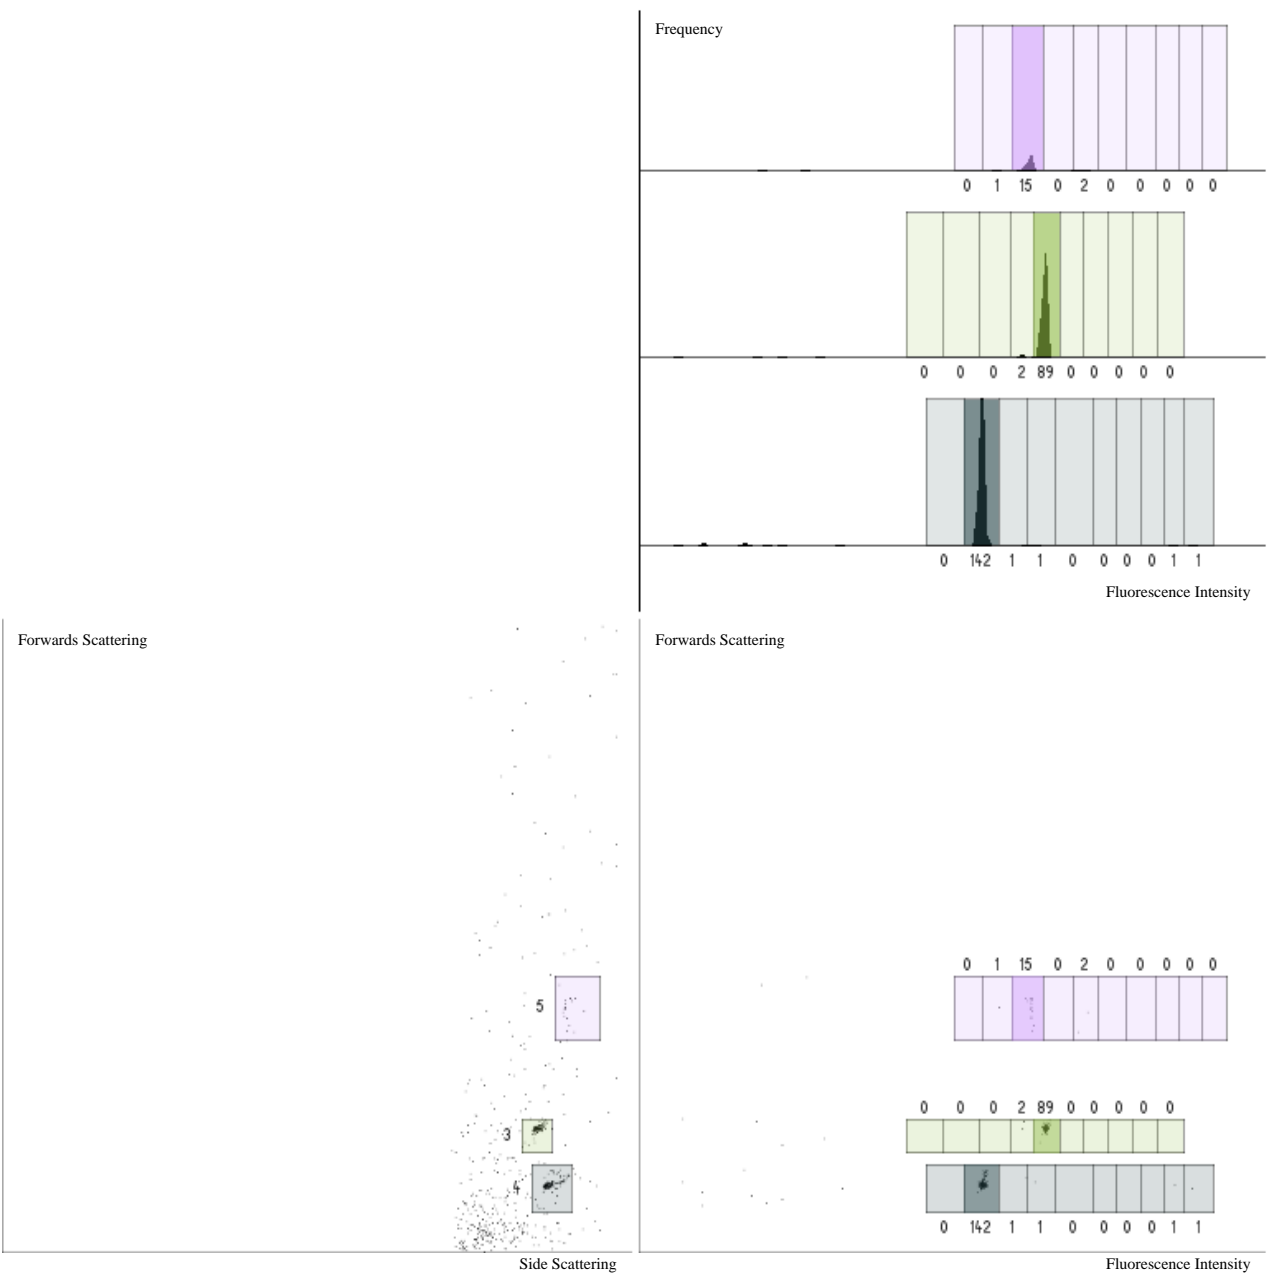



ANNEX 3: TAG DECONVOLUTION - BEAD 55

Passes flow sorting criteria: Yes  
Passes tag deconvolution criteria: Yes  
Included in protocol analysis: Yes  
Protocol: 9, 6, 7, 1  
Filename: Bin1\_plateA0\_B8.fcs  
Split 1: Petrol shading  
Split 2: Green shading  
Split 3: Violet shading

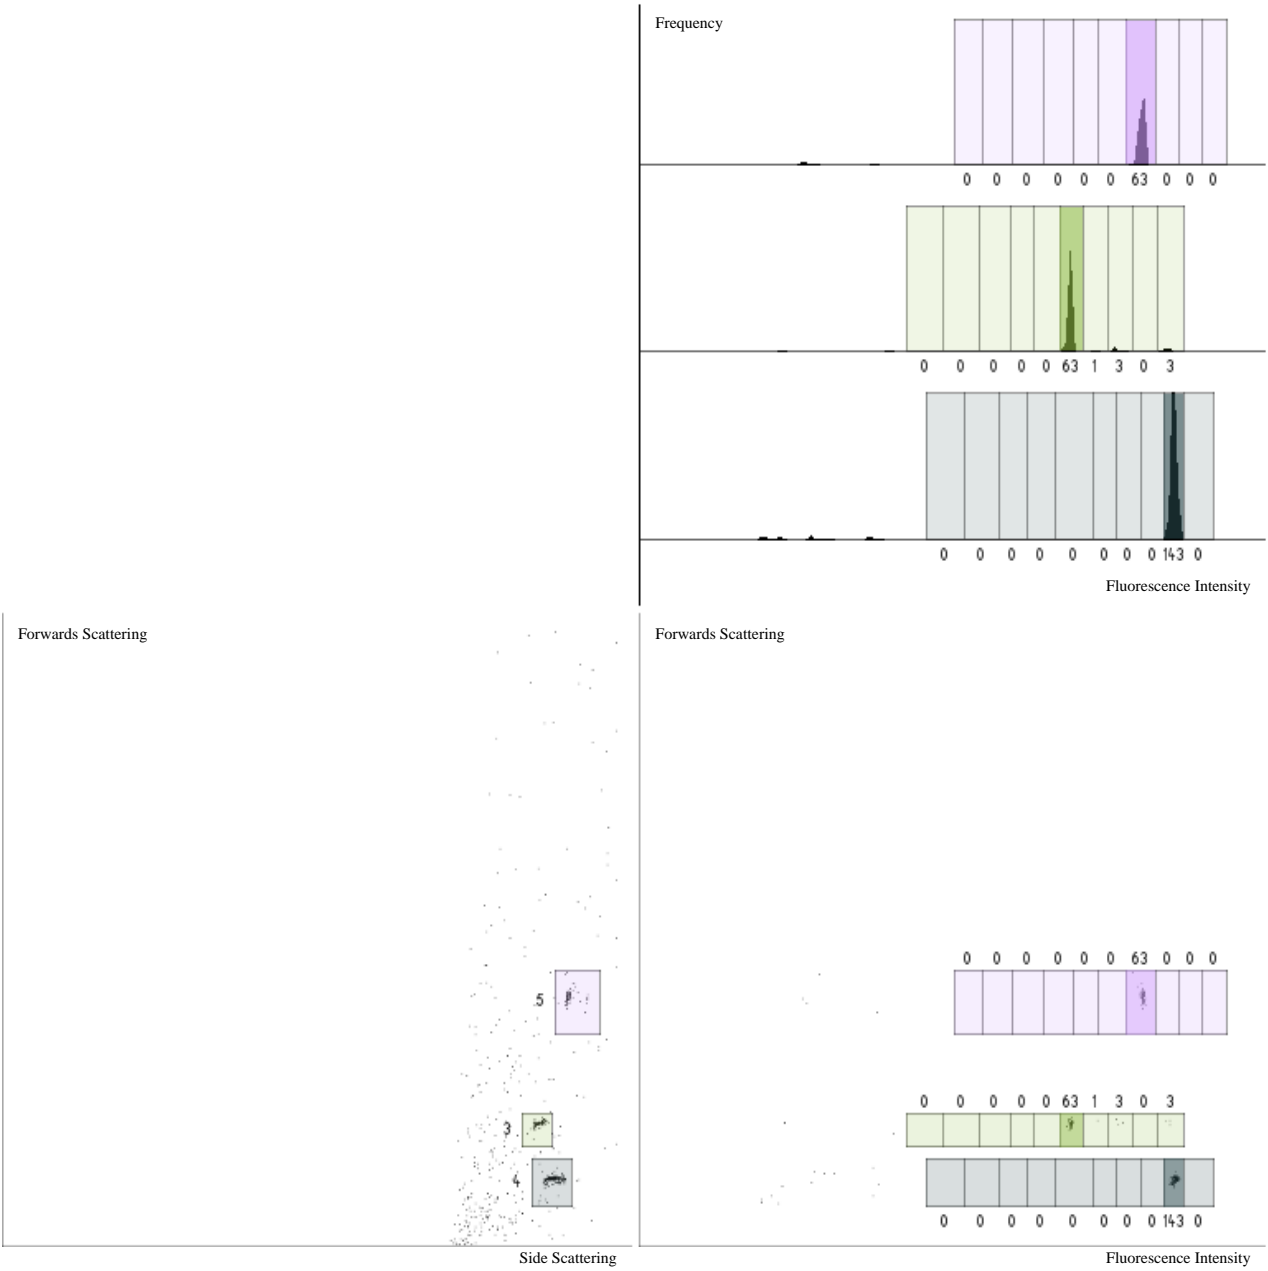

ANNEX 3: TAG DECONVOLUTION - BEAD 56

Passes flow sorting criteria: Yes  
Passes tag deconvolution criteria: Yes  
Included in protocol analysis: Yes  
Protocol: 7, 6, 10, 1  
Filename: Bin1\_plateA0\_B9.fcs  
Split 1: Petrol shading  
Split 2: Green shading  
Split 3: Violet shading

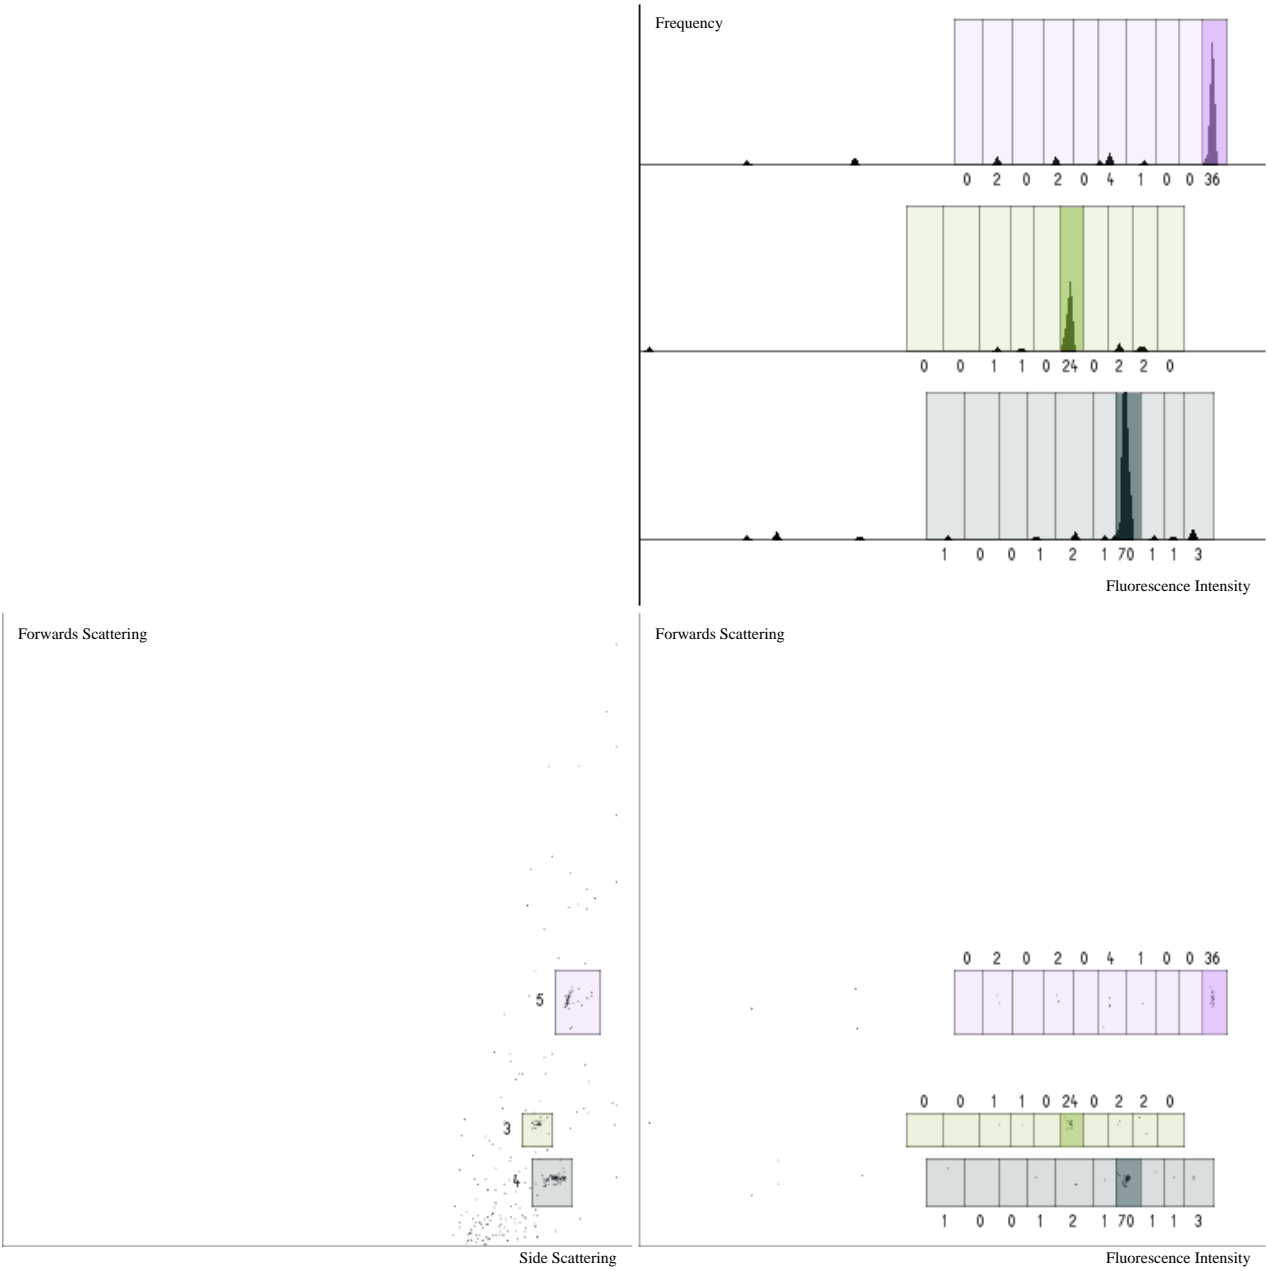

ANNEX 3: TAG DECONVOLUTION - BEAD 57

Passes flow sorting criteria: Yes  
Passes tag deconvolution criteria: Yes  
Included in protocol analysis: Yes  
Protocol: 6, 9, 6, 1  
Filename: Bin1\_plateA0\_B10.fcs  
Split 1: Petrol shading  
Split 2: Green shading  
Split 3: Violet shading

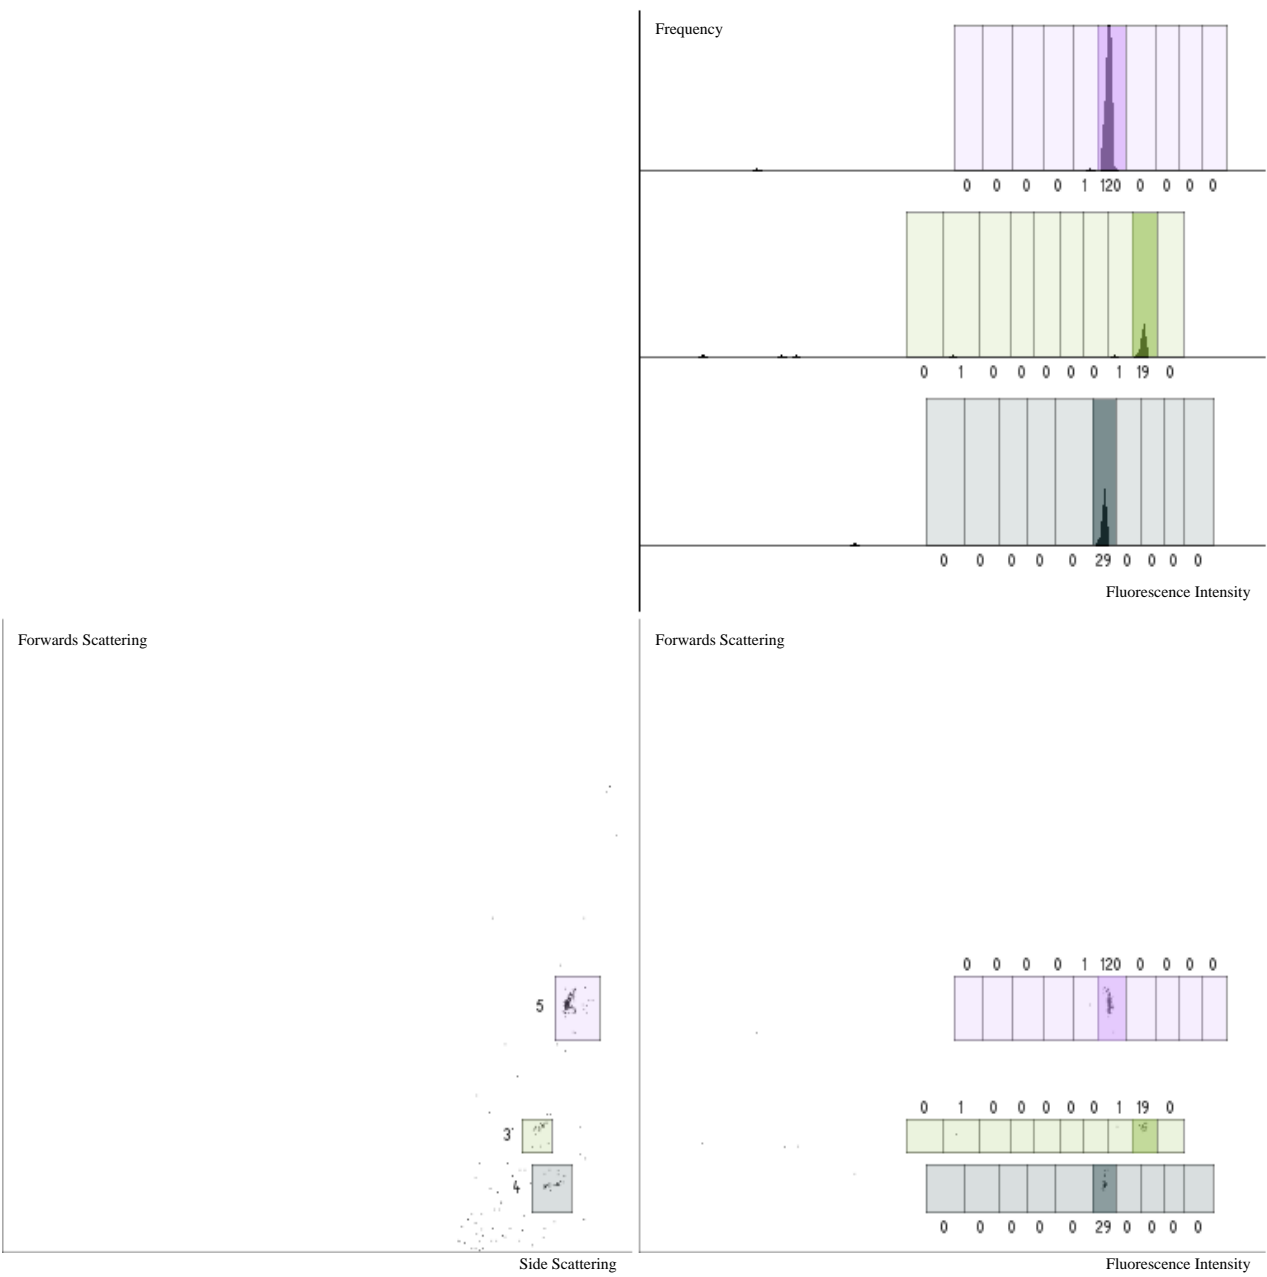

ANNEX 3: TAG DECONVOLUTION - BEAD 58

Passes flow sorting criteria: Yes  
Passes tag deconvolution criteria: Yes  
Included in protocol analysis: Yes  
Protocol: 7, 7, 2, 1  
Filename: Bin1\_plateA0\_C8.fcs  
Split 1: Petrol shading  
Split 2: Green shading  
Split 3: Violet shading

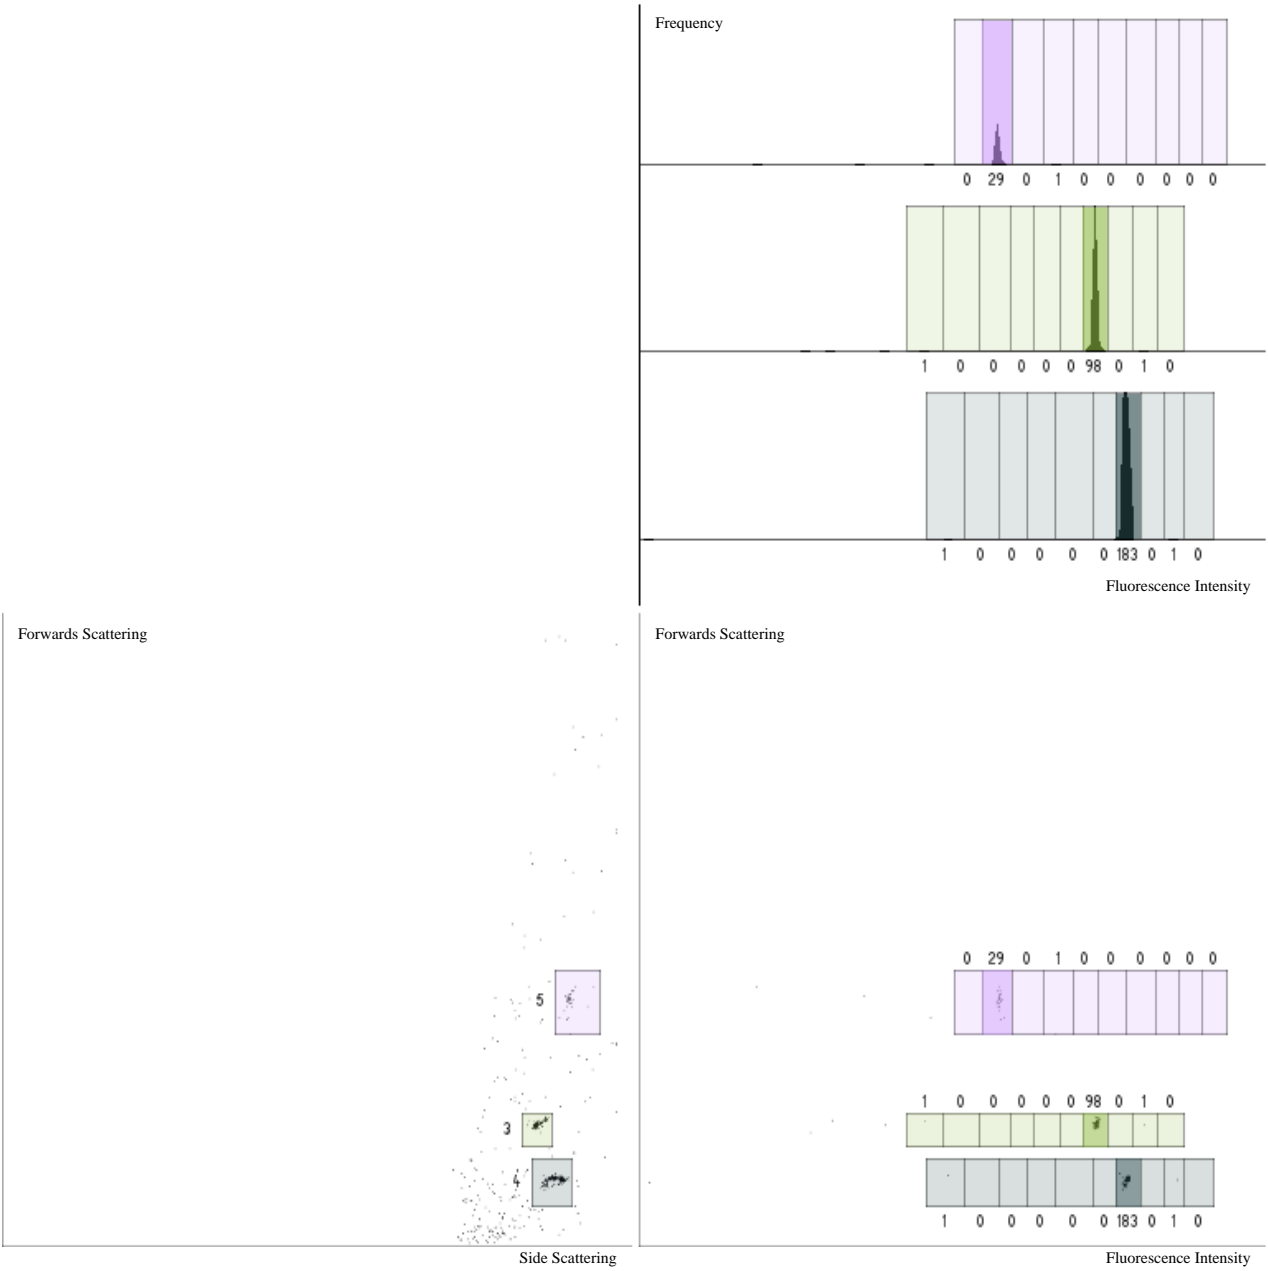

ANNEX 3: TAG DECONVOLUTION - BEAD 59

Passes flow sorting criteria: Yes  
Passes tag deconvolution criteria: No  
Included in protocol analysis: No  
Protocol: N/A  
Filename: Bin1\_plateA0\_C9.fcs  
Split 1: Petrol shading  
Split 2: Green shading  
Split 3: Violet shading

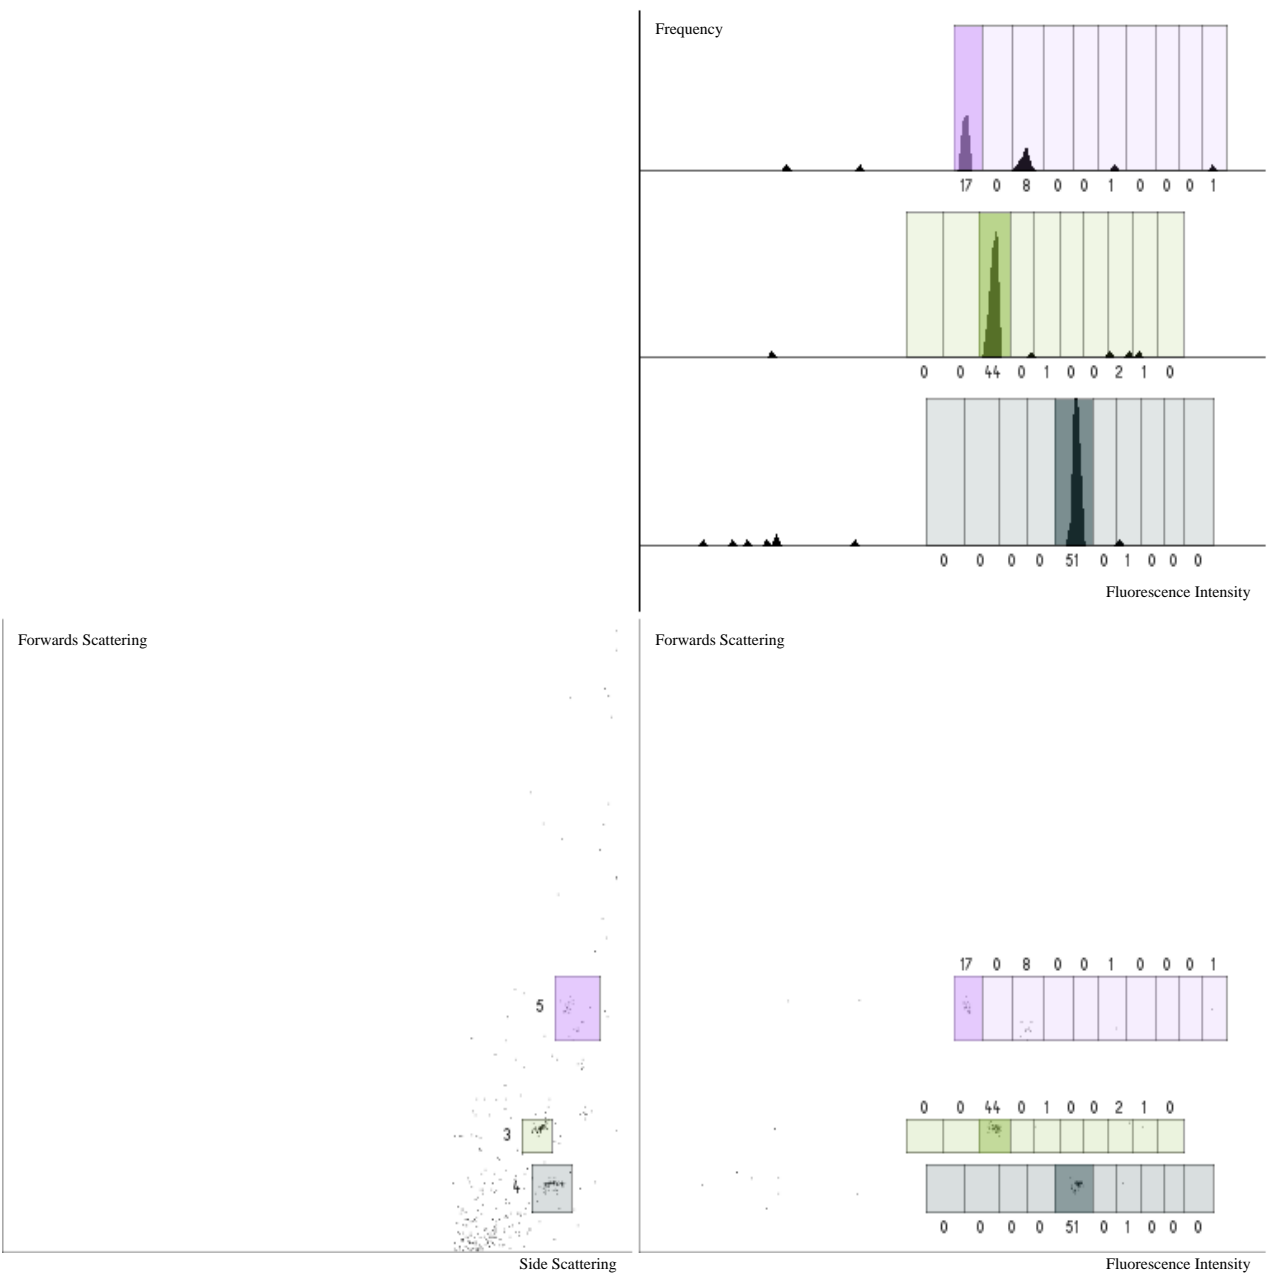

ANNEX 3: TAG DECONVOLUTION - BEAD 60

Passes flow sorting criteria: Yes  
Passes tag deconvolution criteria: Yes  
Included in protocol analysis: Yes  
Protocol: 10, 2, 3, 1  
Filename: Bin1\_plateA0\_C10.fcs  
Split 1: Petrol shading  
Split 2: Green shading  
Split 3: Violet shading

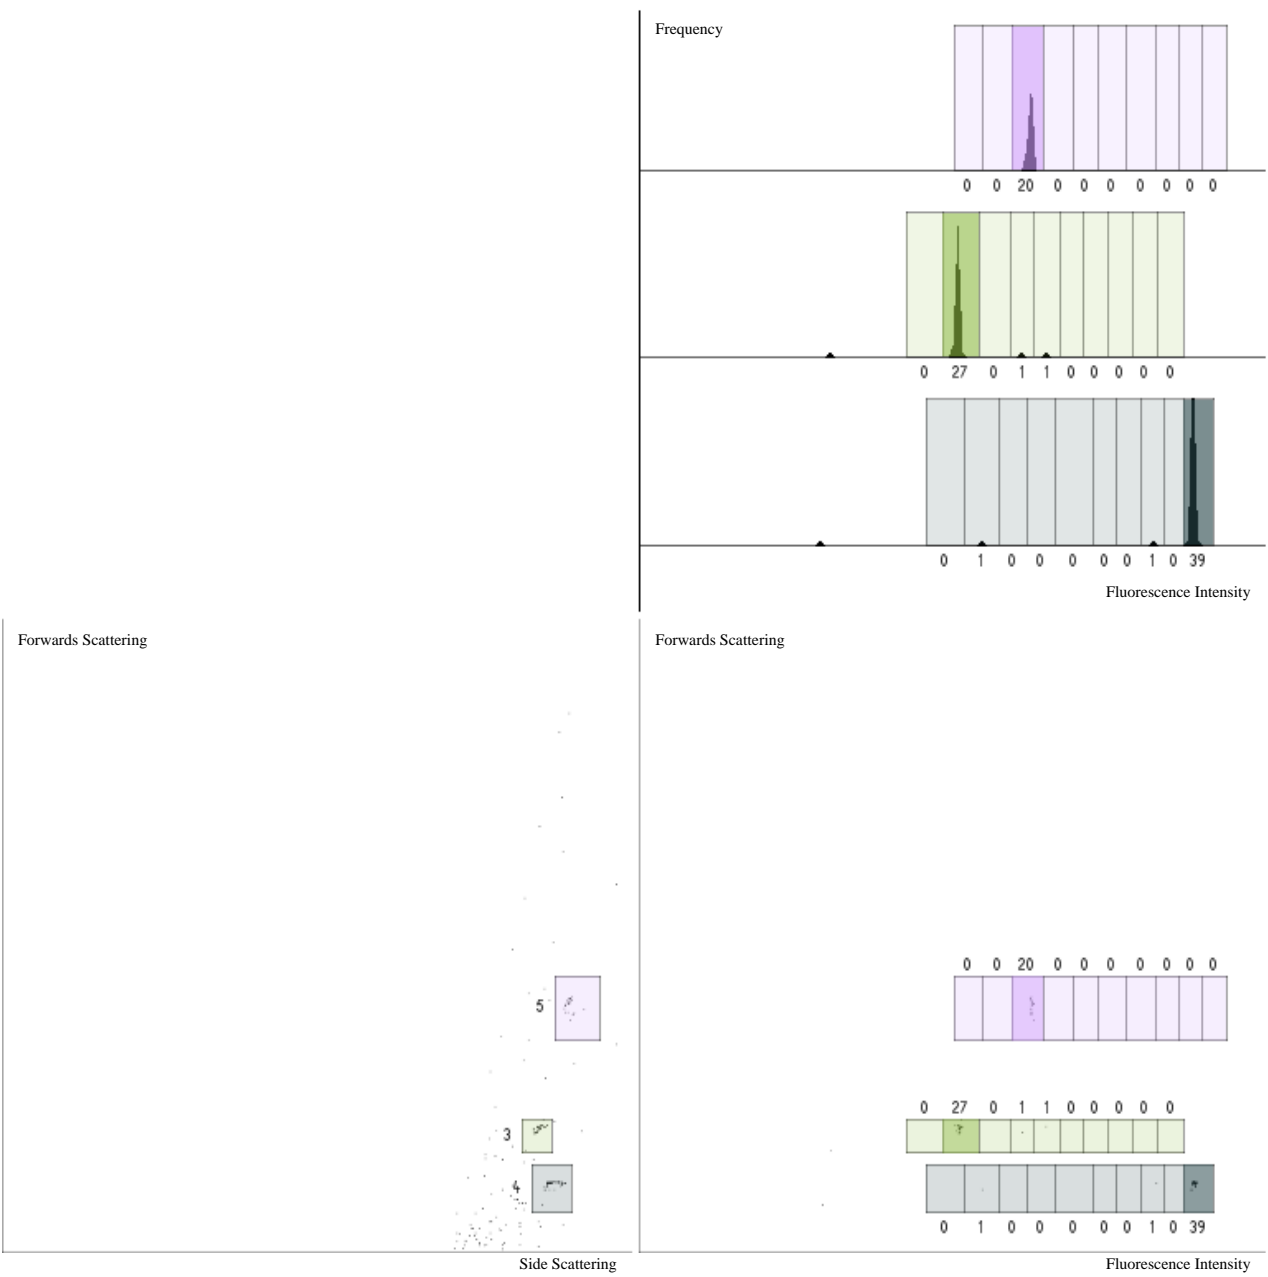

ANNEX 3: TAG DECONVOLUTION - BEAD 61

Passes flow sorting criteria: Yes  
Passes tag deconvolution criteria: Yes  
Included in protocol analysis: Yes  
Protocol: 9, 2, 6, 1  
Filename: Bin1\_plateA0\_D8.fcs  
Split 1: Petrol shading  
Split 2: Green shading  
Split 3: Violet shading

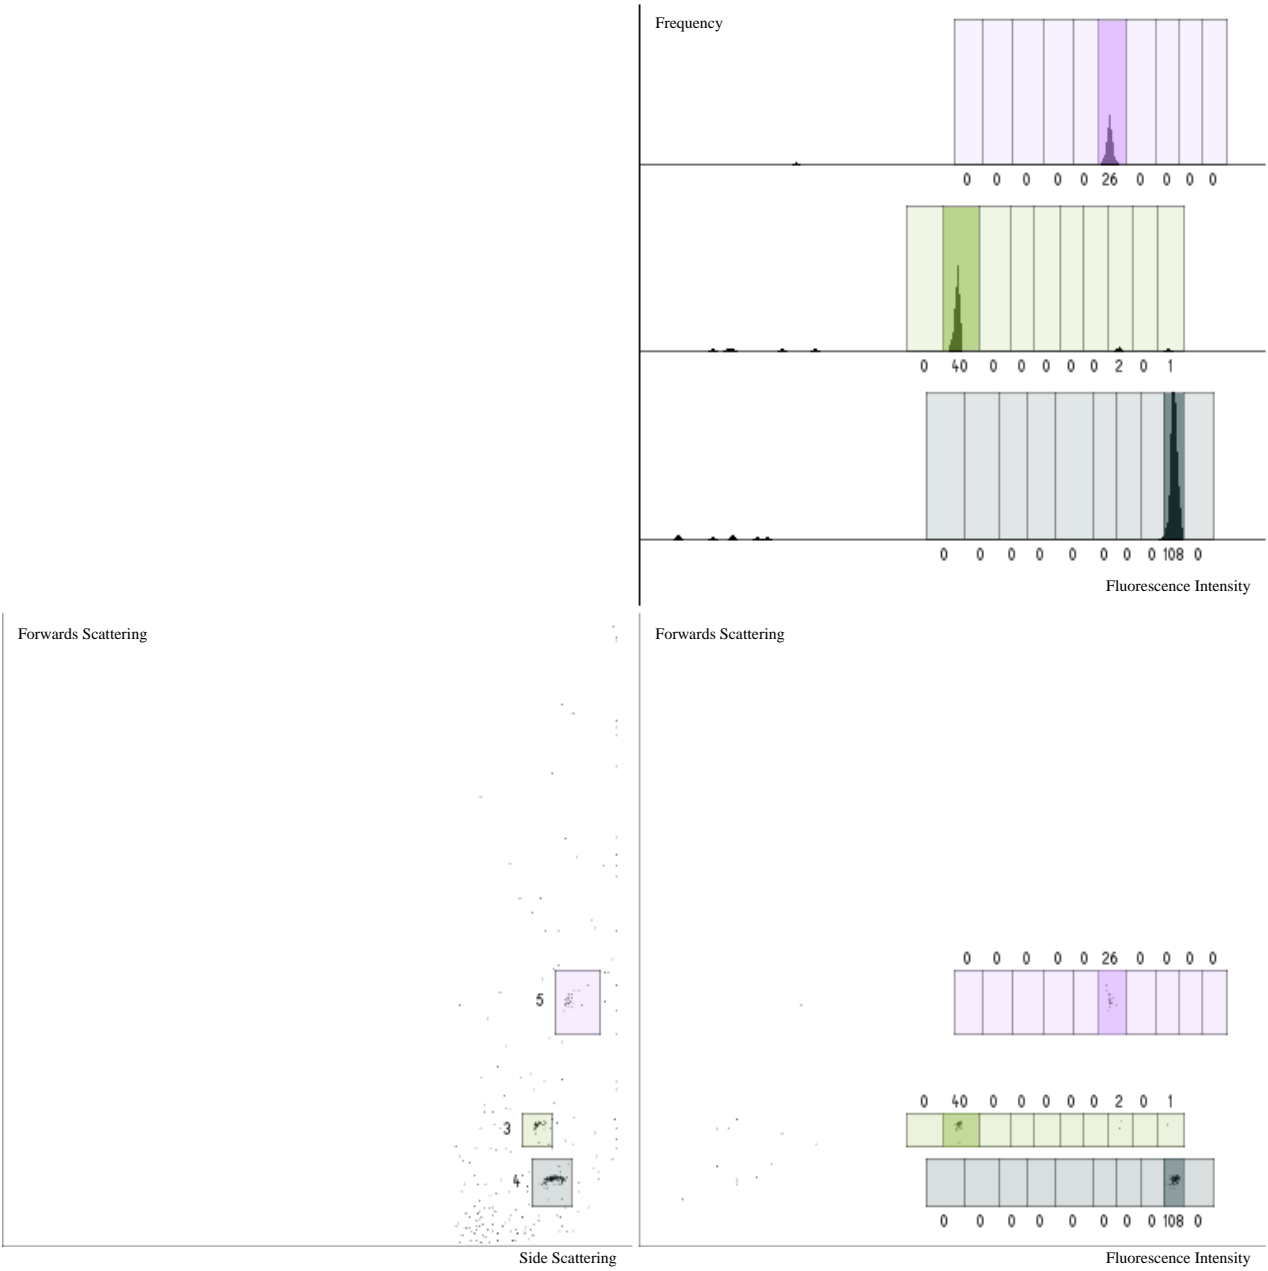

ANNEX 3: TAG DECONVOLUTION - BEAD 62

Passes flow sorting criteria: Yes  
Passes tag deconvolution criteria: No  
Included in protocol analysis: No  
Protocol: N/A  
Filename: Bin1\_plateA0\_D9.fcs  
Split 1: Petrol shading  
Split 2: Green shading  
Split 3: Violet shading

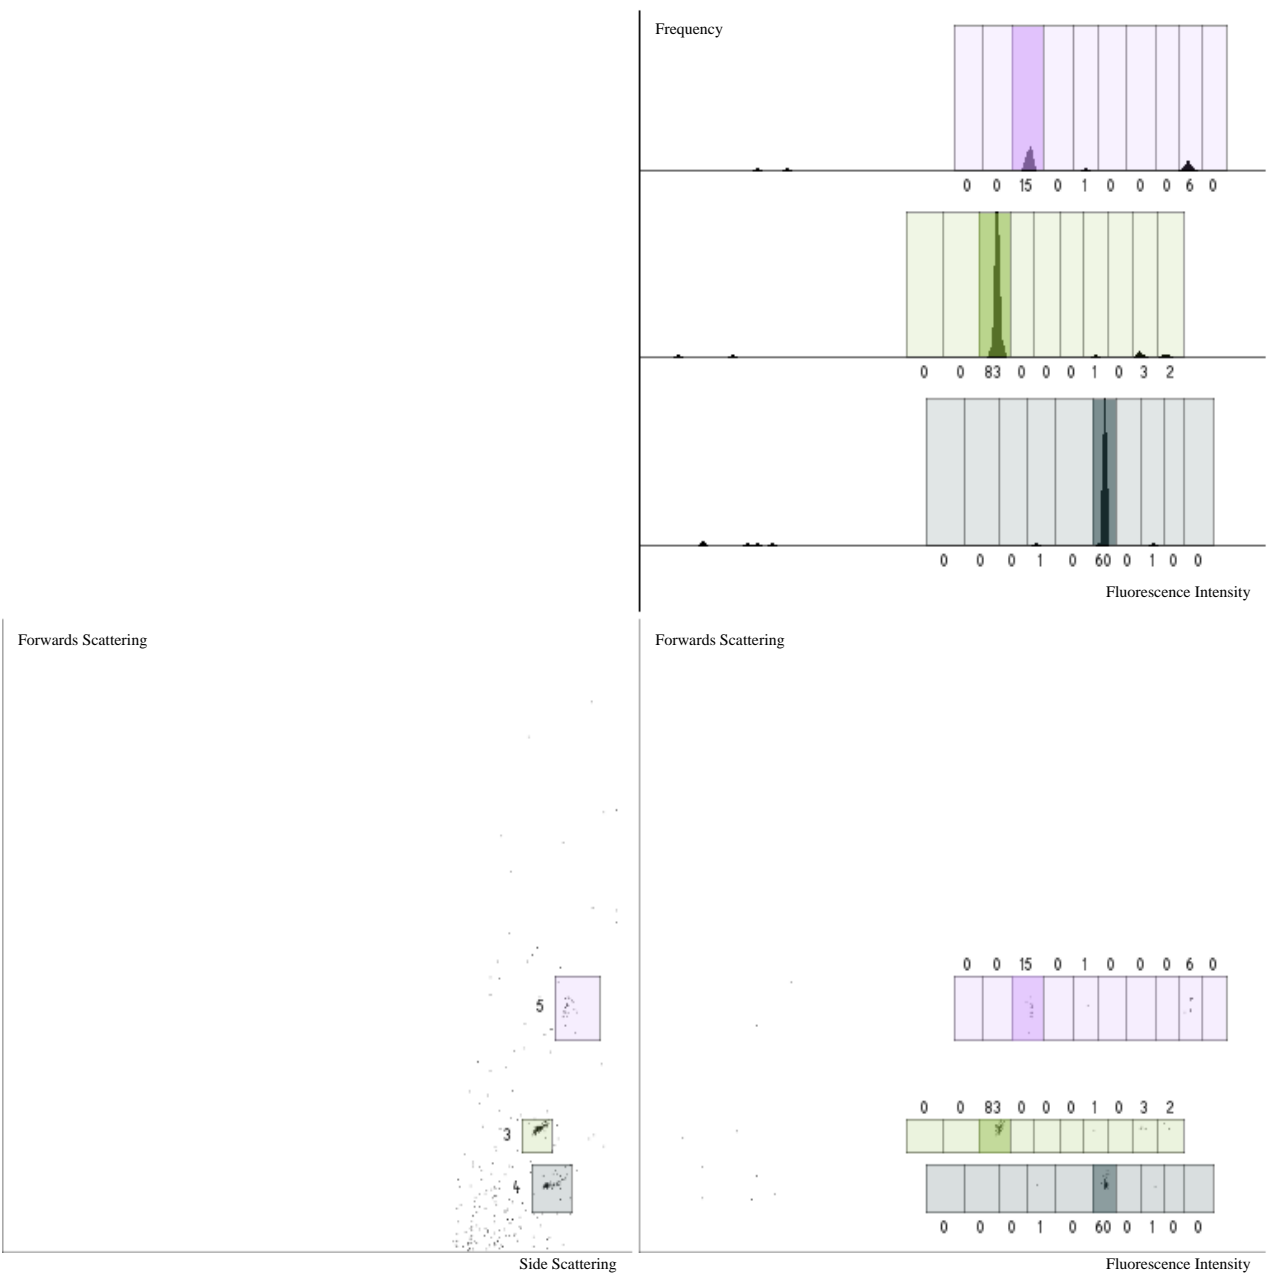



ANNEX 3: TAG DECONVOLUTION - BEAD 63

Passes flow sorting criteria: Yes  
Passes tag deconvolution criteria: Yes  
Included in protocol analysis: Yes  
Protocol: 3, 8, 2, 1  
Filename: Bin1\_plateA0\_D10.fcs  
Split 1: Petrol shading  
Split 2: Green shading  
Split 3: Violet shading

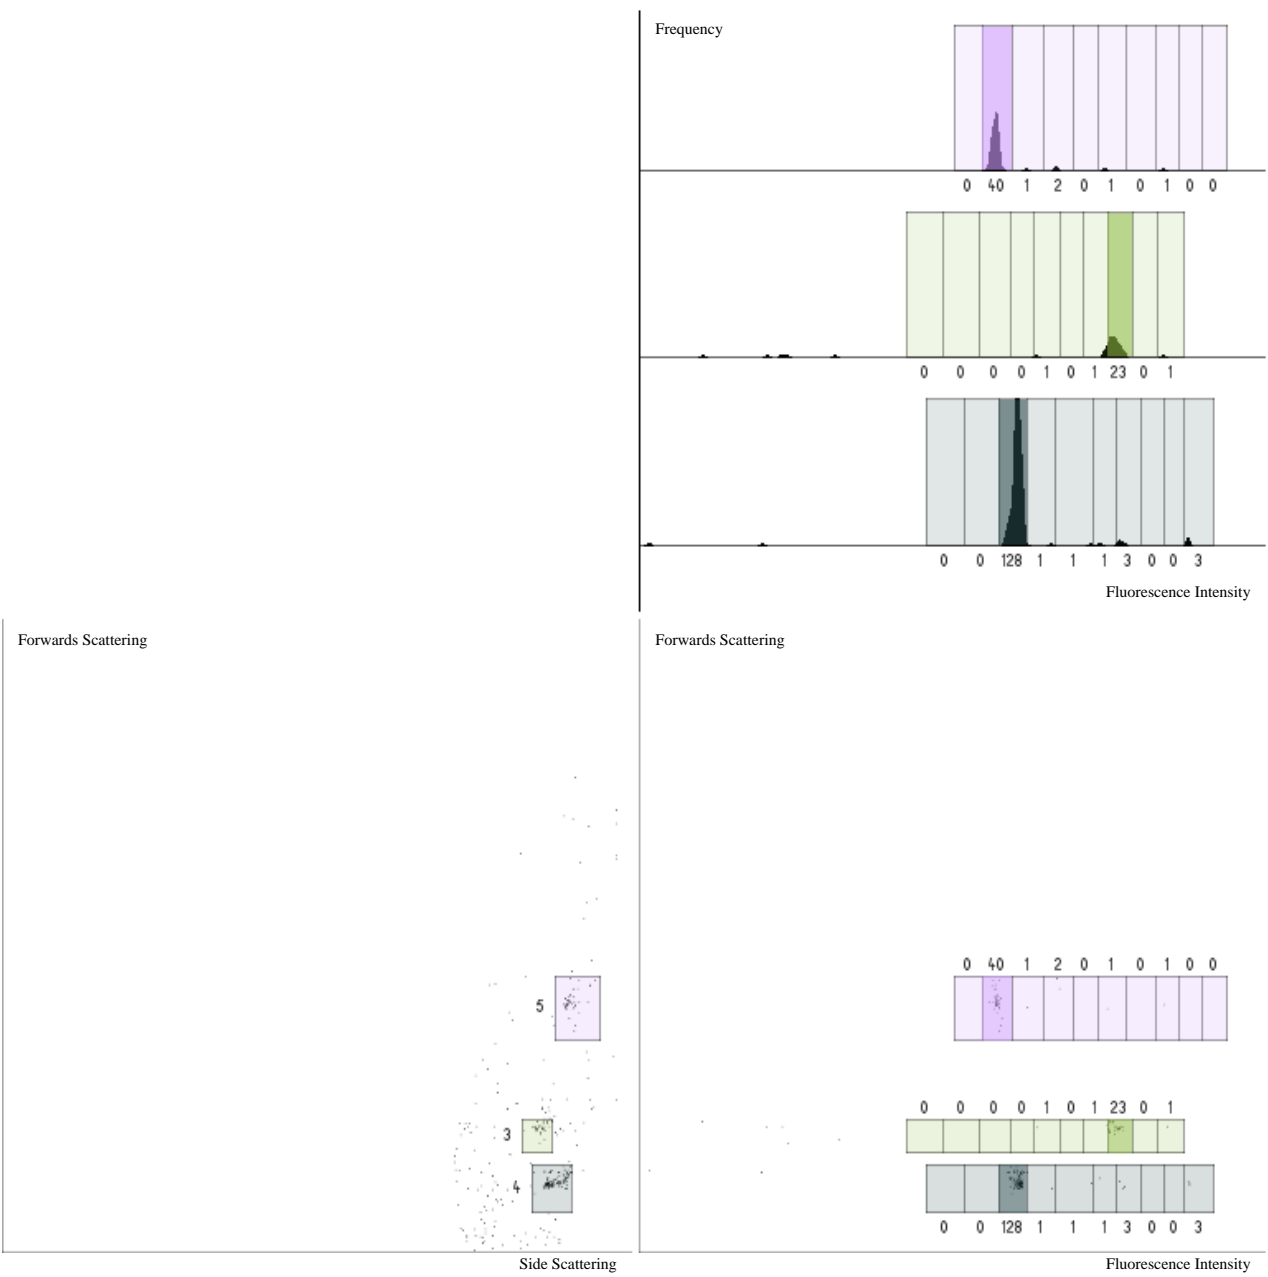

ANNEX 3: TAG DECONVOLUTION - BEAD 64

Passes flow sorting criteria: Yes  
Passes tag deconvolution criteria: No  
Included in protocol analysis: No  
Protocol: N/A  
Filename: Bin1\_plateA0\_E7.fcs  
Split 1: Petrol shading  
Split 2: Green shading  
Split 3: Violet shading

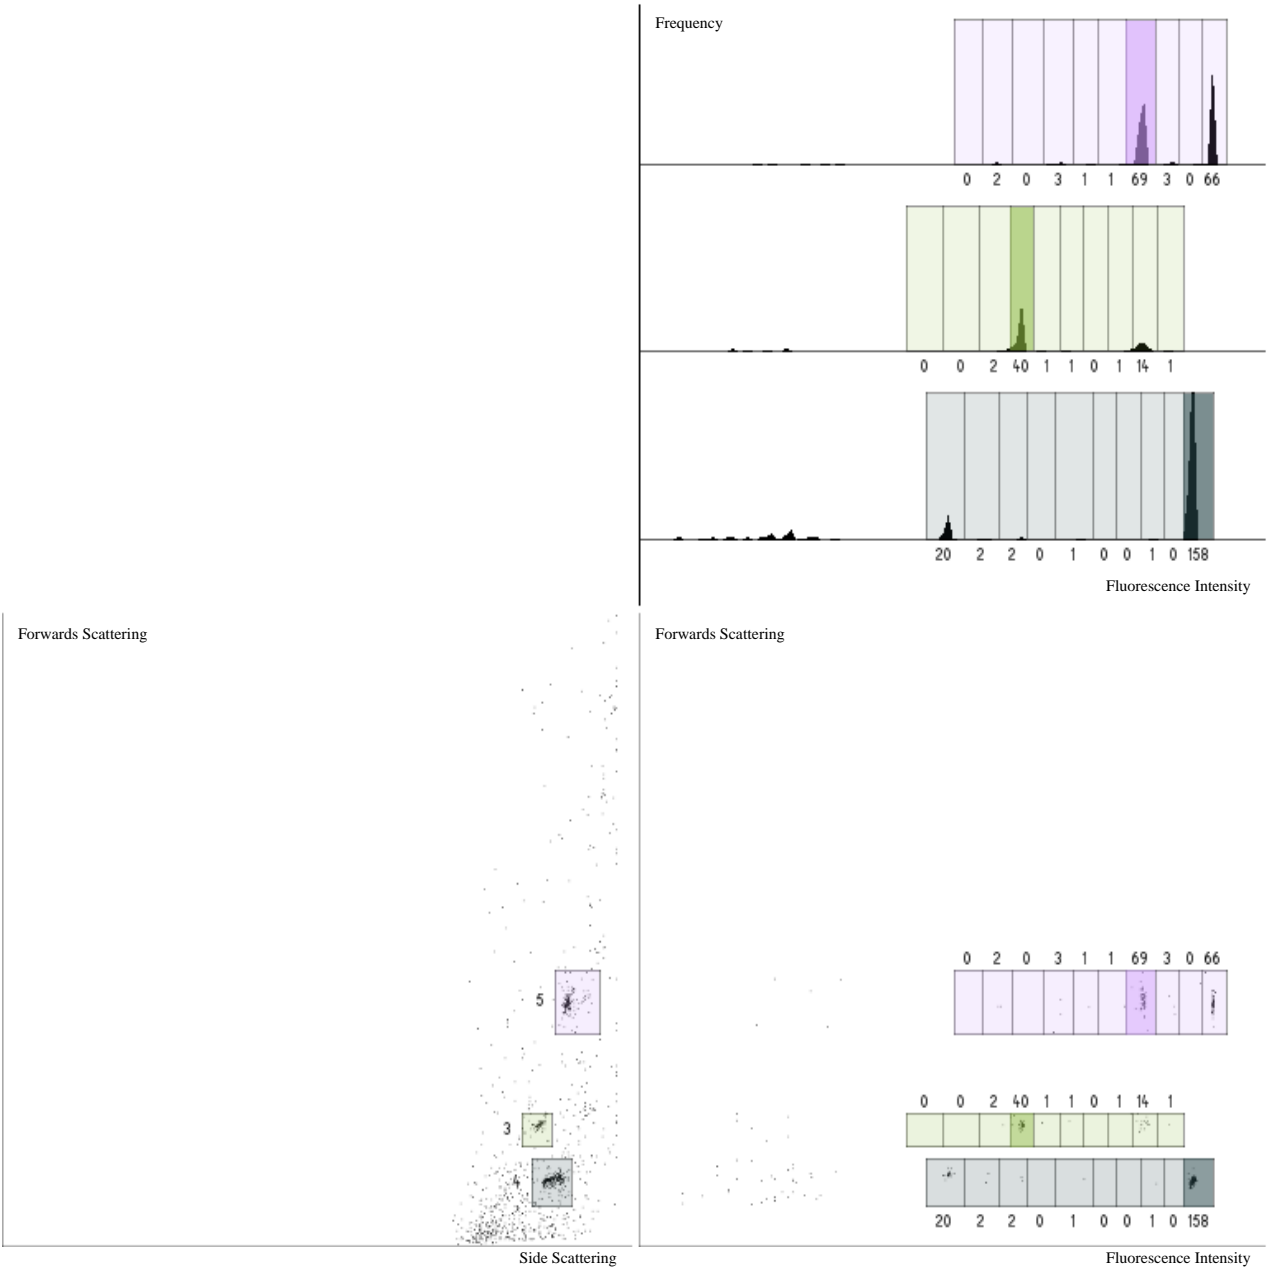

ANNEX 3: TAG DECONVOLUTION - BEAD 65

Passes flow sorting criteria: Yes  
Passes tag deconvolution criteria: Yes  
Included in protocol analysis: Yes  
Protocol: 5, 7, 10, 1  
Filename: Bin1\_plateA0\_E8.fcs  
Split 1: Petrol shading  
Split 2: Green shading  
Split 3: Violet shading

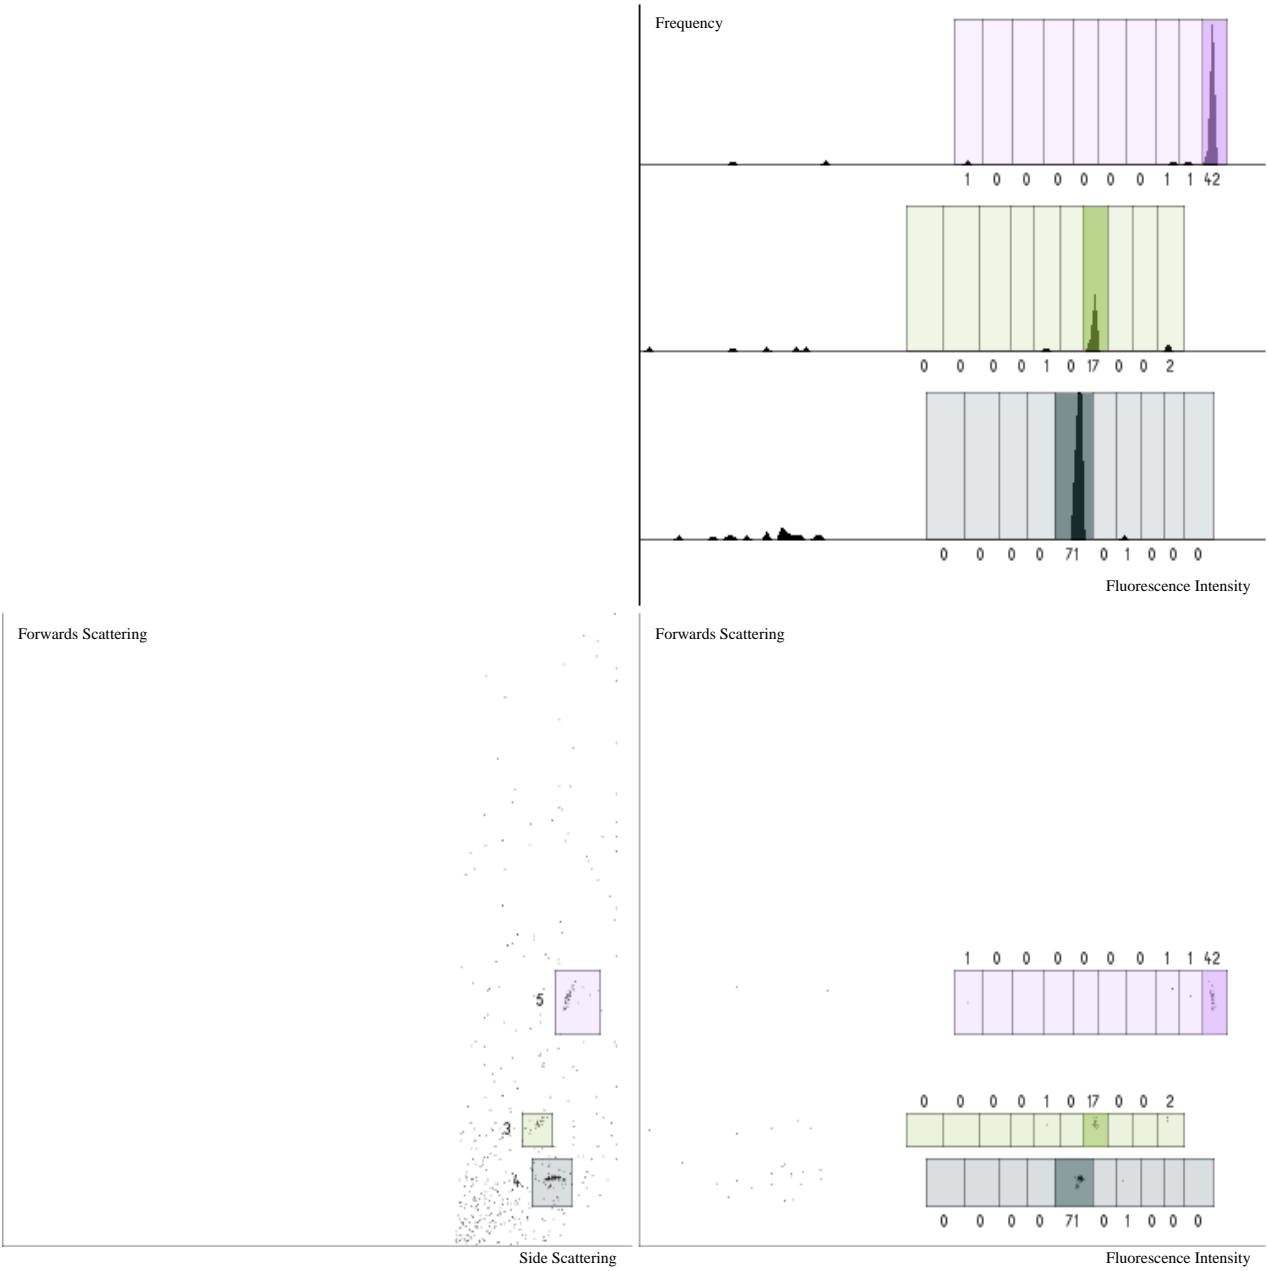

ANNEX 3: TAG DECONVOLUTION - BEAD 66

Passes flow sorting criteria: Yes  
Passes tag deconvolution criteria: Yes  
Included in protocol analysis: Yes  
Protocol: 1, 5, 1, 1  
Filename: Bin1\_plateA0\_E10.fcs  
Split 1: Petrol shading  
Split 2: Green shading  
Split 3: Violet shading

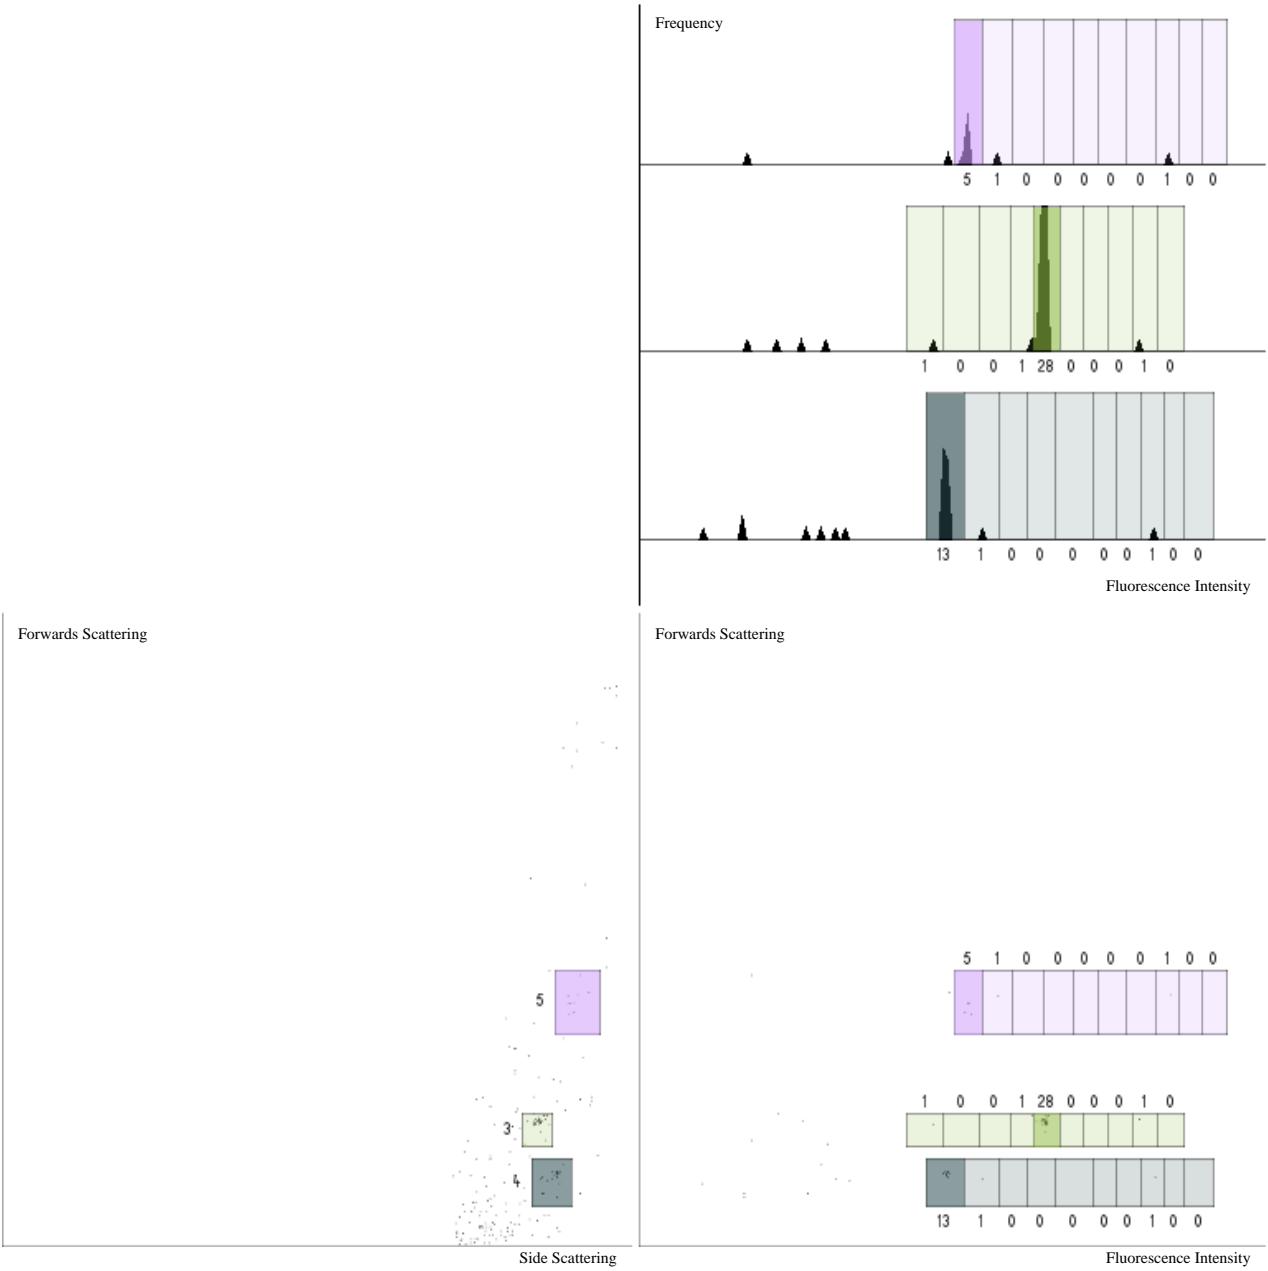

ANNEX 3: TAG DECONVOLUTION - BEAD 67

Passes flow sorting criteria: Yes  
Passes tag deconvolution criteria: Yes  
Included in protocol analysis: Yes  
Protocol: 2, 10, 1, 1  
Filename: Bin1\_plateA0\_F7.fcs  
Split 1: Petrol shading  
Split 2: Green shading  
Split 3: Violet shading

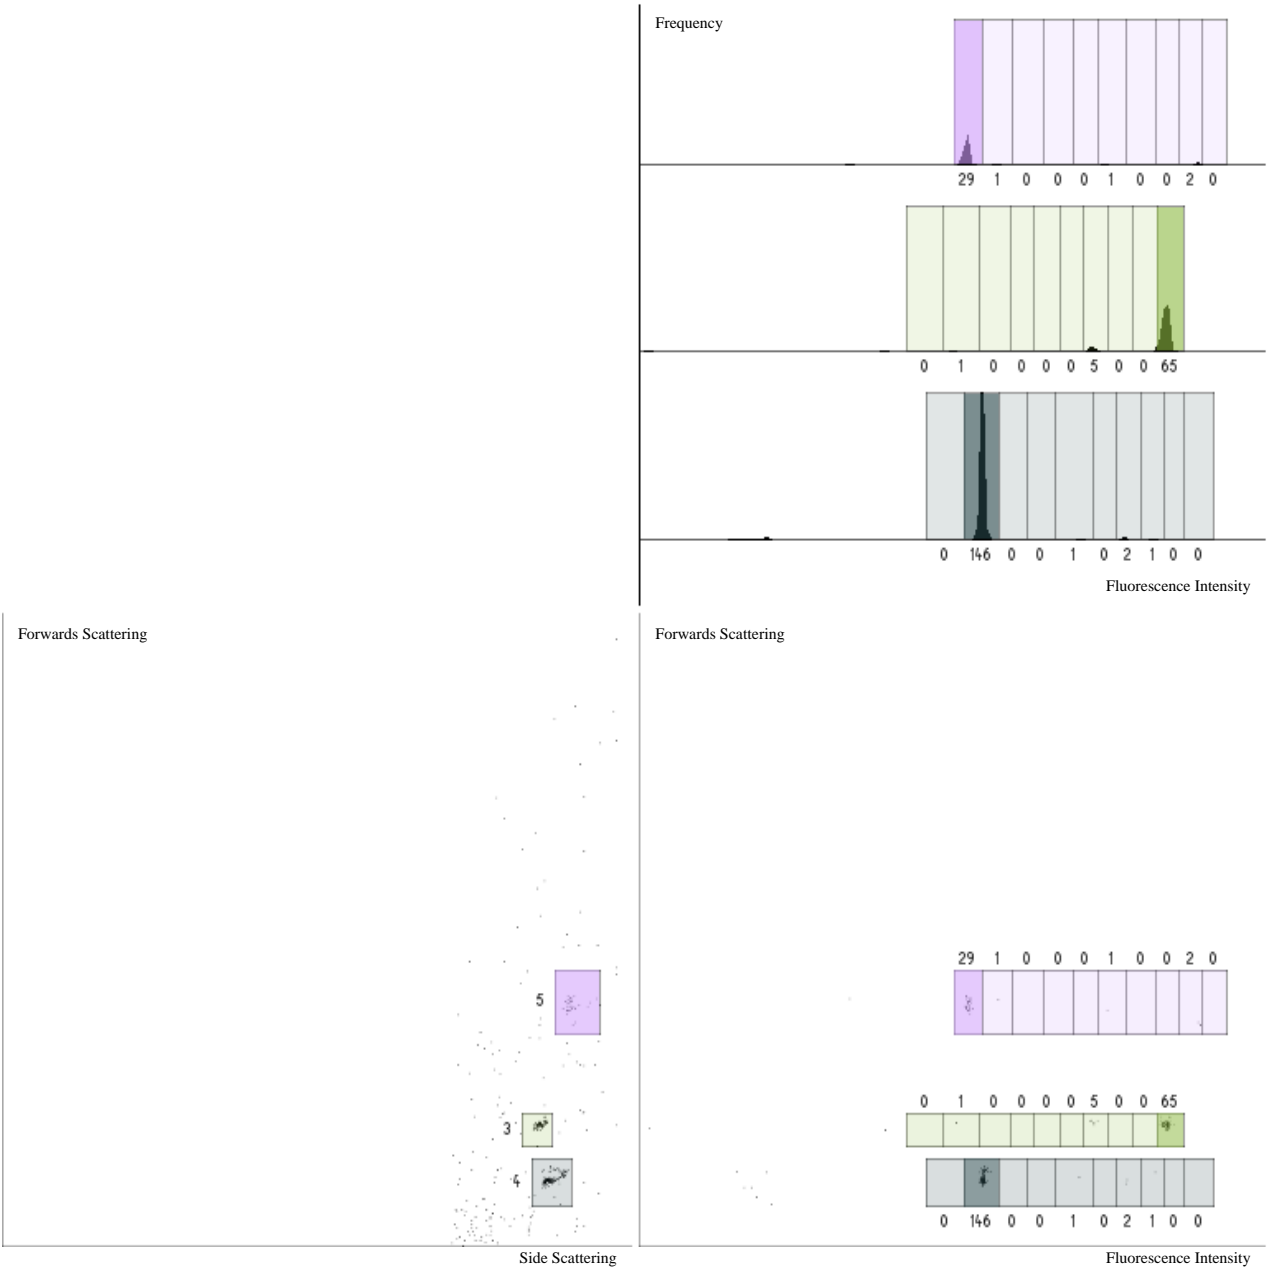

ANNEX 3: TAG DECONVOLUTION - BEAD 68

Passes flow sorting criteria: Yes  
Passes tag deconvolution criteria: Yes  
Included in protocol analysis: Yes  
Protocol: 3, 9, 1, 1  
Filename: Bin1\_plateA0\_F8.fcs  
Split 1: Petrol shading  
Split 2: Green shading  
Split 3: Violet shading

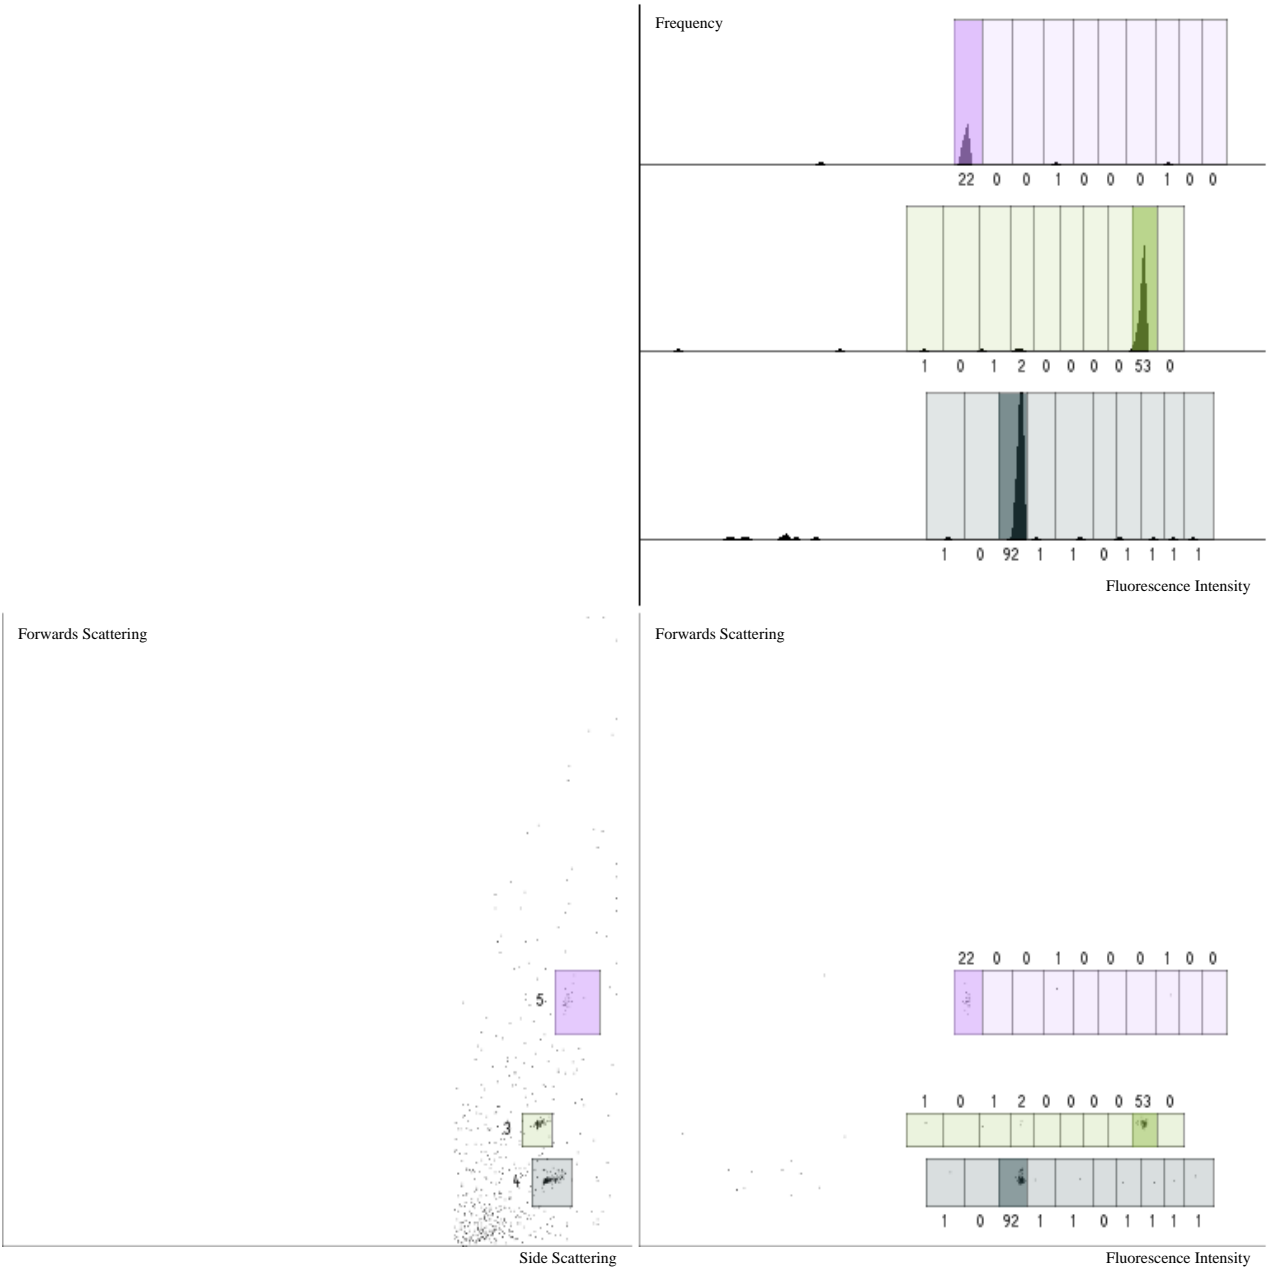

ANNEX 3: TAG DECONVOLUTION - BEAD 69

Passes flow sorting criteria: Yes  
Passes tag deconvolution criteria: Yes  
Included in protocol analysis: Yes  
Protocol: 9, 10, 3, 1  
Filename: Bin1\_plateA0\_F9.fcs  
Split 1: Petrol shading  
Split 2: Green shading  
Split 3: Violet shading

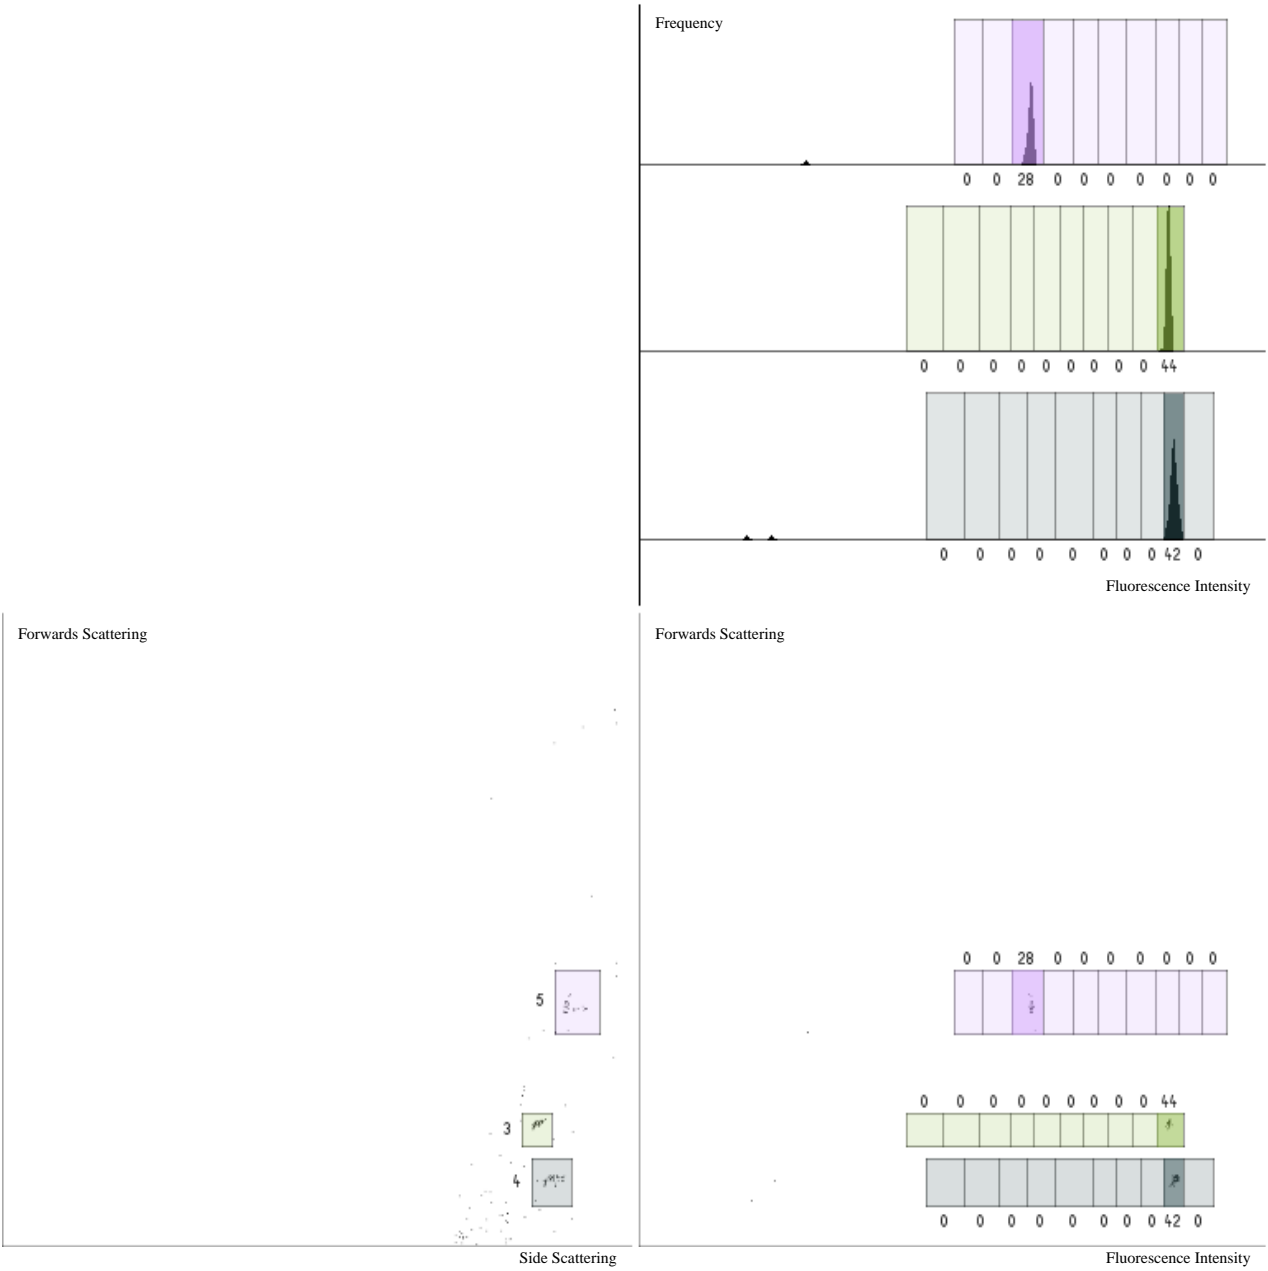

ANNEX 3: TAG DECONVOLUTION - BEAD 70

Passes flow sorting criteria: Yes  
Passes tag deconvolution criteria: Yes  
Included in protocol analysis: Yes  
Protocol: 9, 9, 4, 1  
Filename: Bin1\_plateA0\_F10.fcs  
Split 1: Petrol shading  
Split 2: Green shading  
Split 3: Violet shading

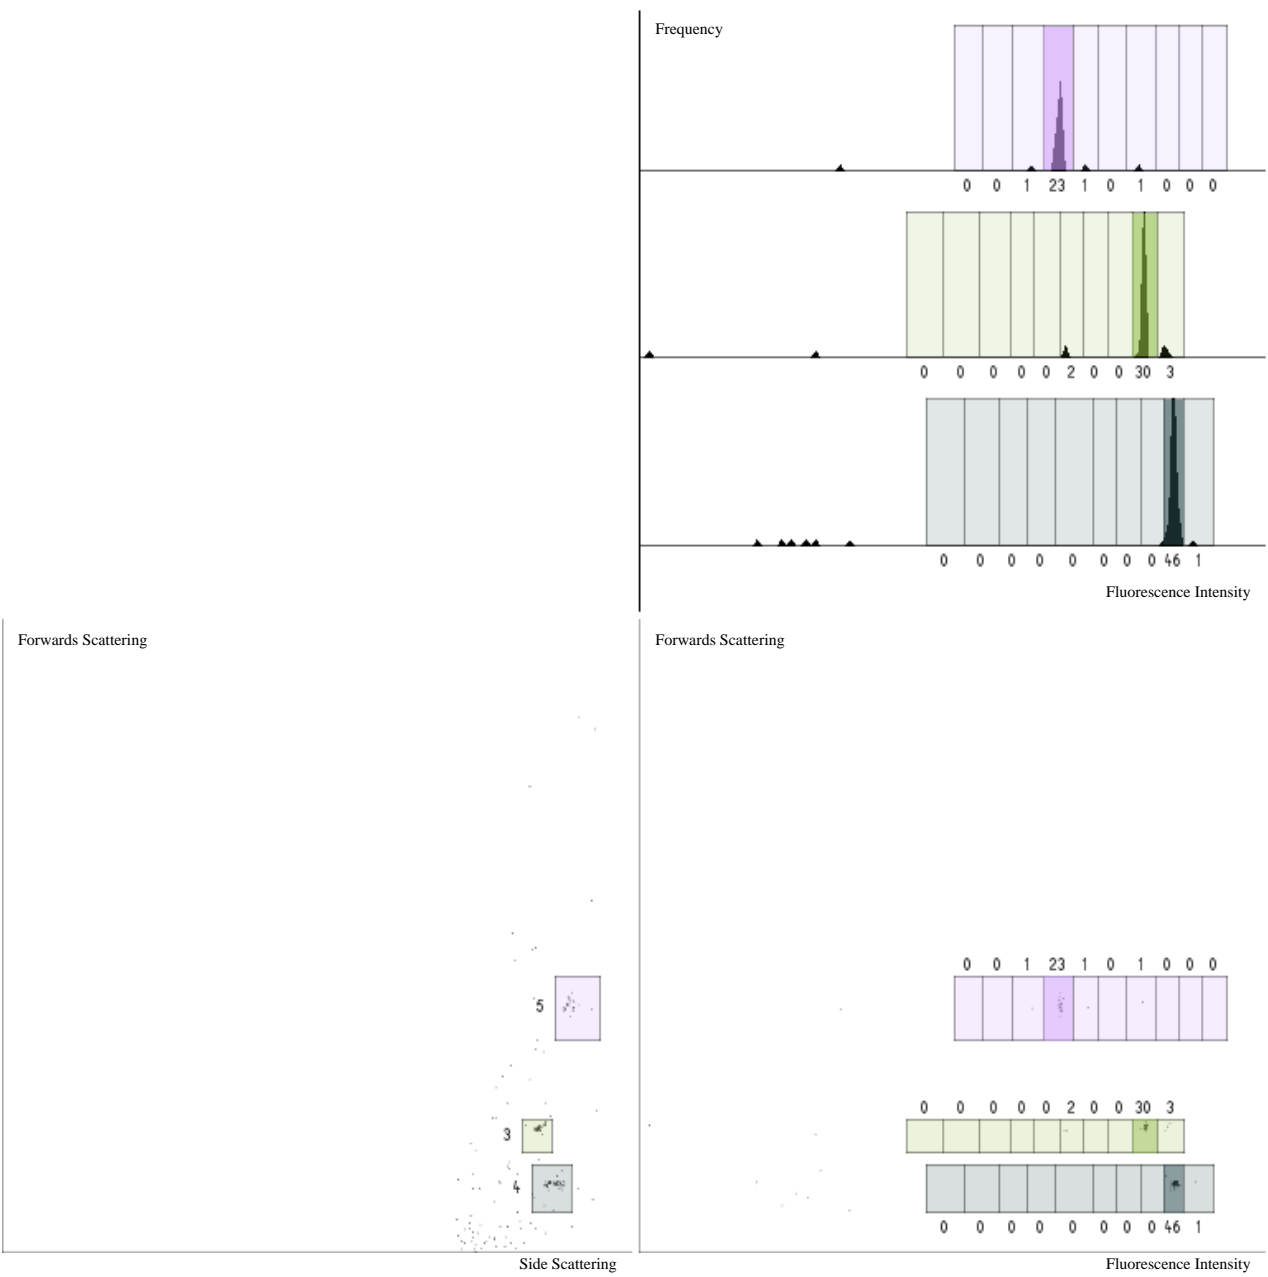



ANNEX 3: TAG DECONVOLUTION - BEAD 71

Passes flow sorting criteria: Yes  
Passes tag deconvolution criteria: Yes  
Included in protocol analysis: Yes  
Protocol: 5, 9, 10, 1  
Filename: Bin1\_plateA0\_G7.fcs  
Split 1: Petrol shading  
Split 2: Green shading  
Split 3: Violet shading

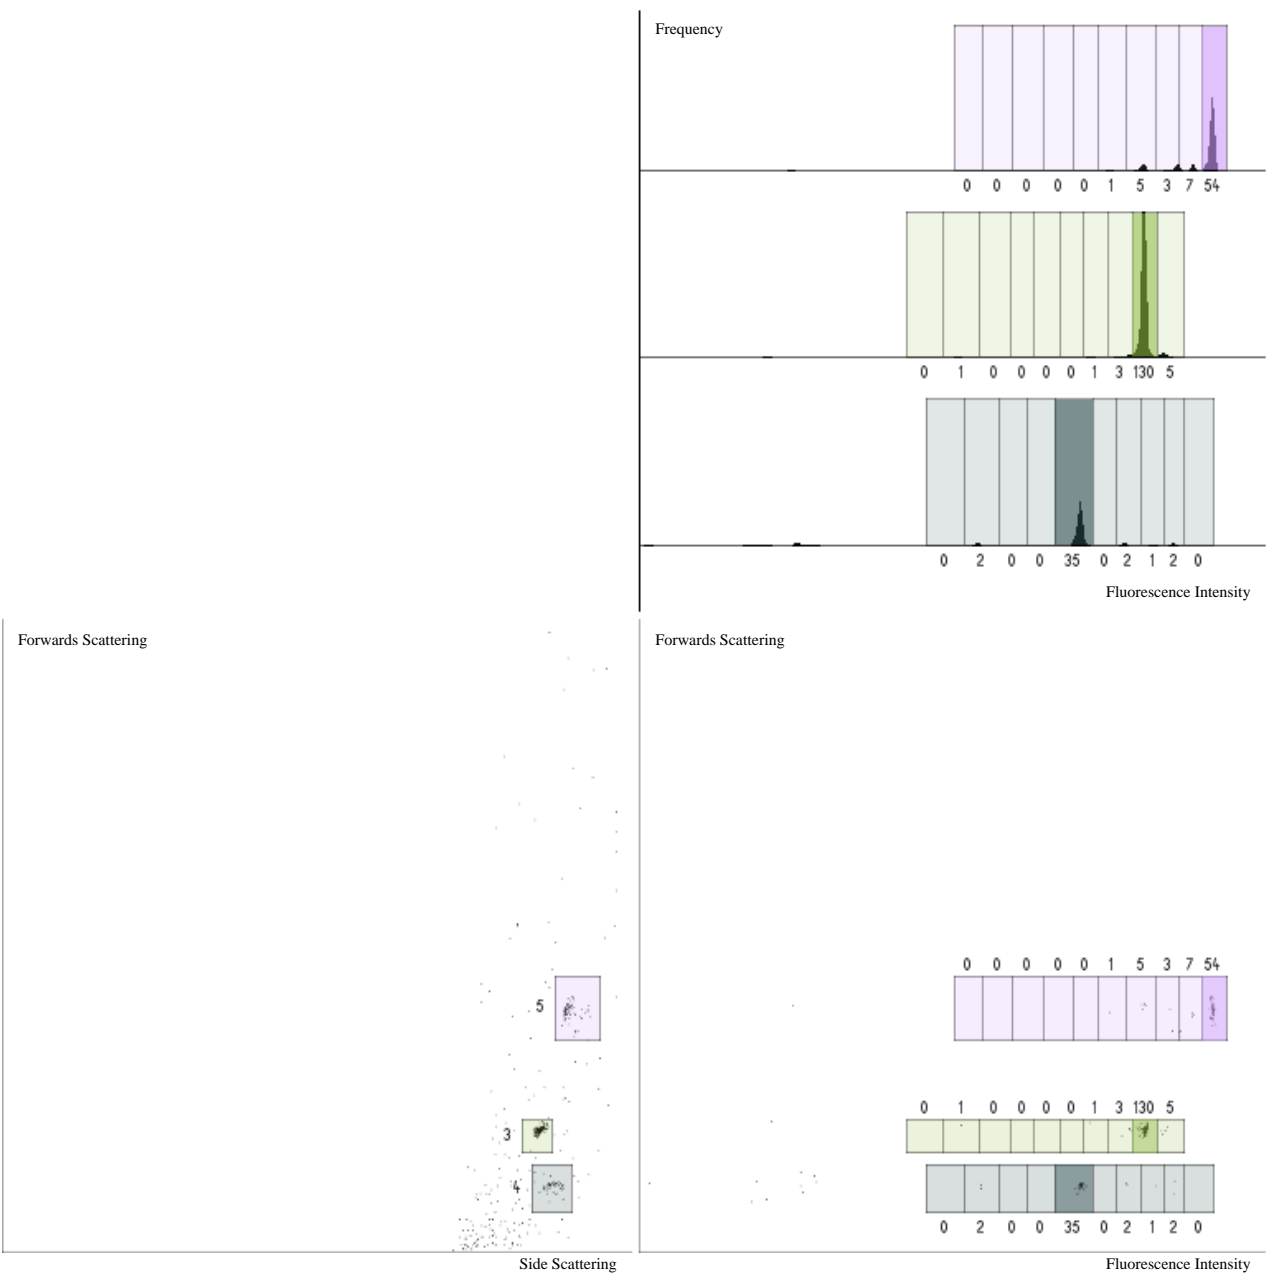

ANNEX 3: TAG DECONVOLUTION - BEAD 72

Passes flow sorting criteria: Yes  
Passes tag deconvolution criteria: No  
Included in protocol analysis: No  
Protocol: N/A  
Filename: Bin1\_plateA0\_G8.fcs  
Split 1: Petrol shading  
Split 2: Green shading  
Split 3: Violet shading

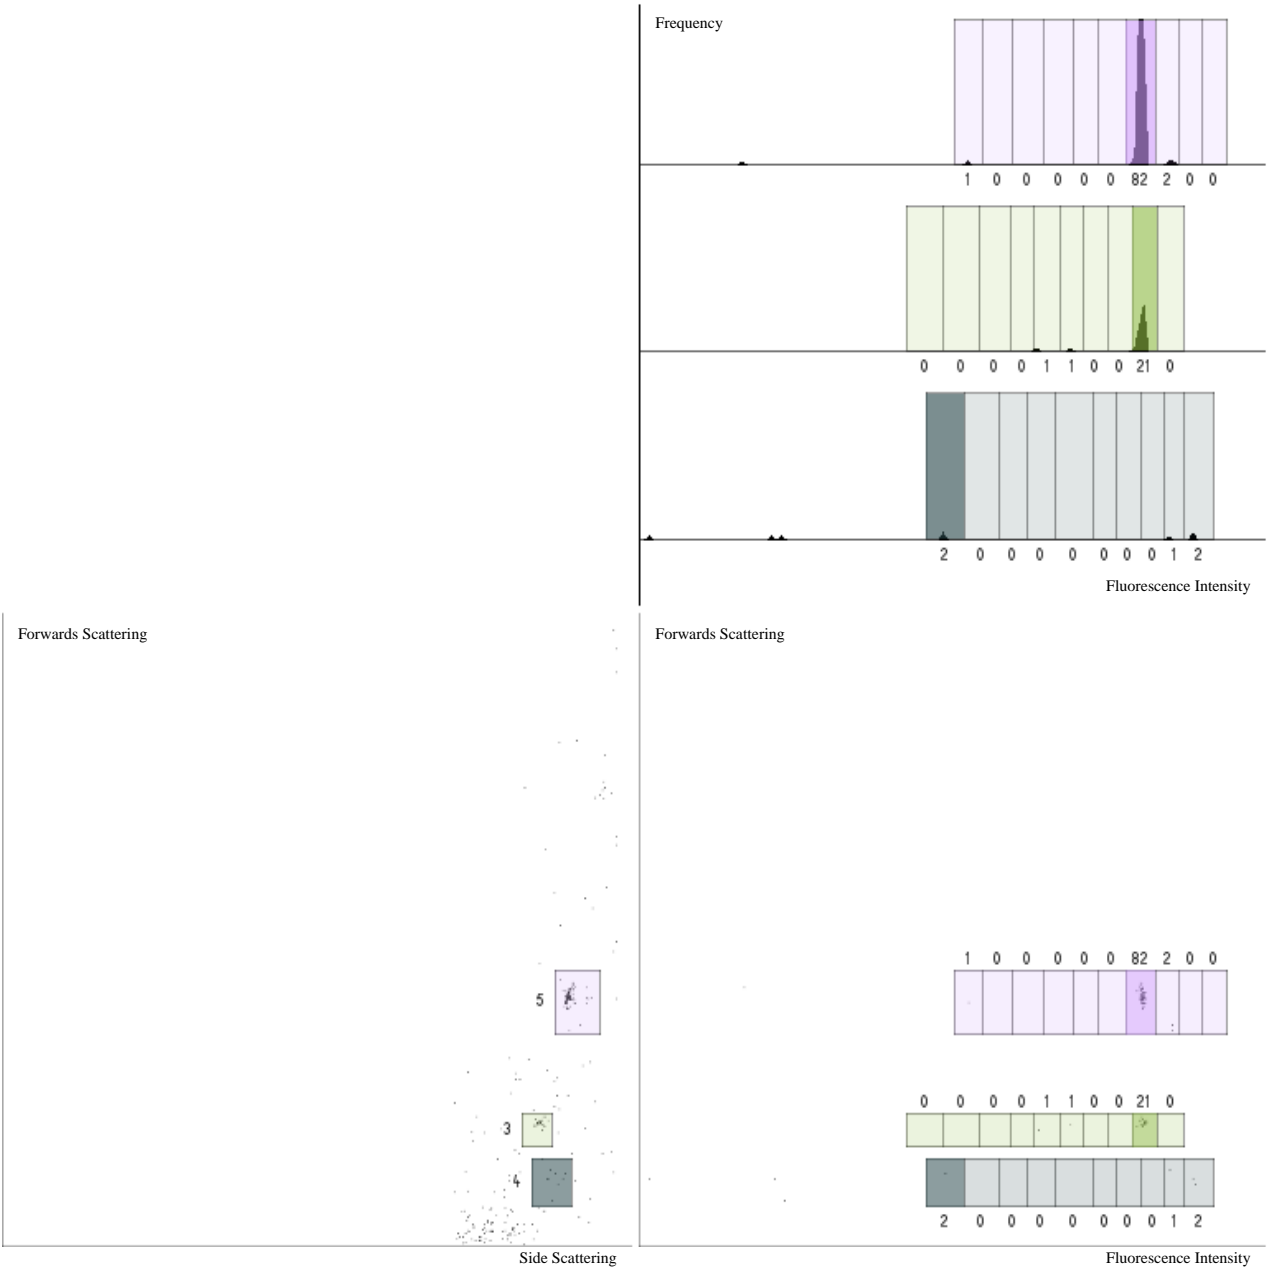

ANNEX 3: TAG DECONVOLUTION - BEAD 73

Passes flow sorting criteria: Yes  
Passes tag deconvolution criteria: Yes  
Included in protocol analysis: Yes  
Protocol: 10, 2, 6, 1  
Filename: Bin1\_plateA0\_G9.fcs  
Split 1: Petrol shading  
Split 2: Green shading  
Split 3: Violet shading

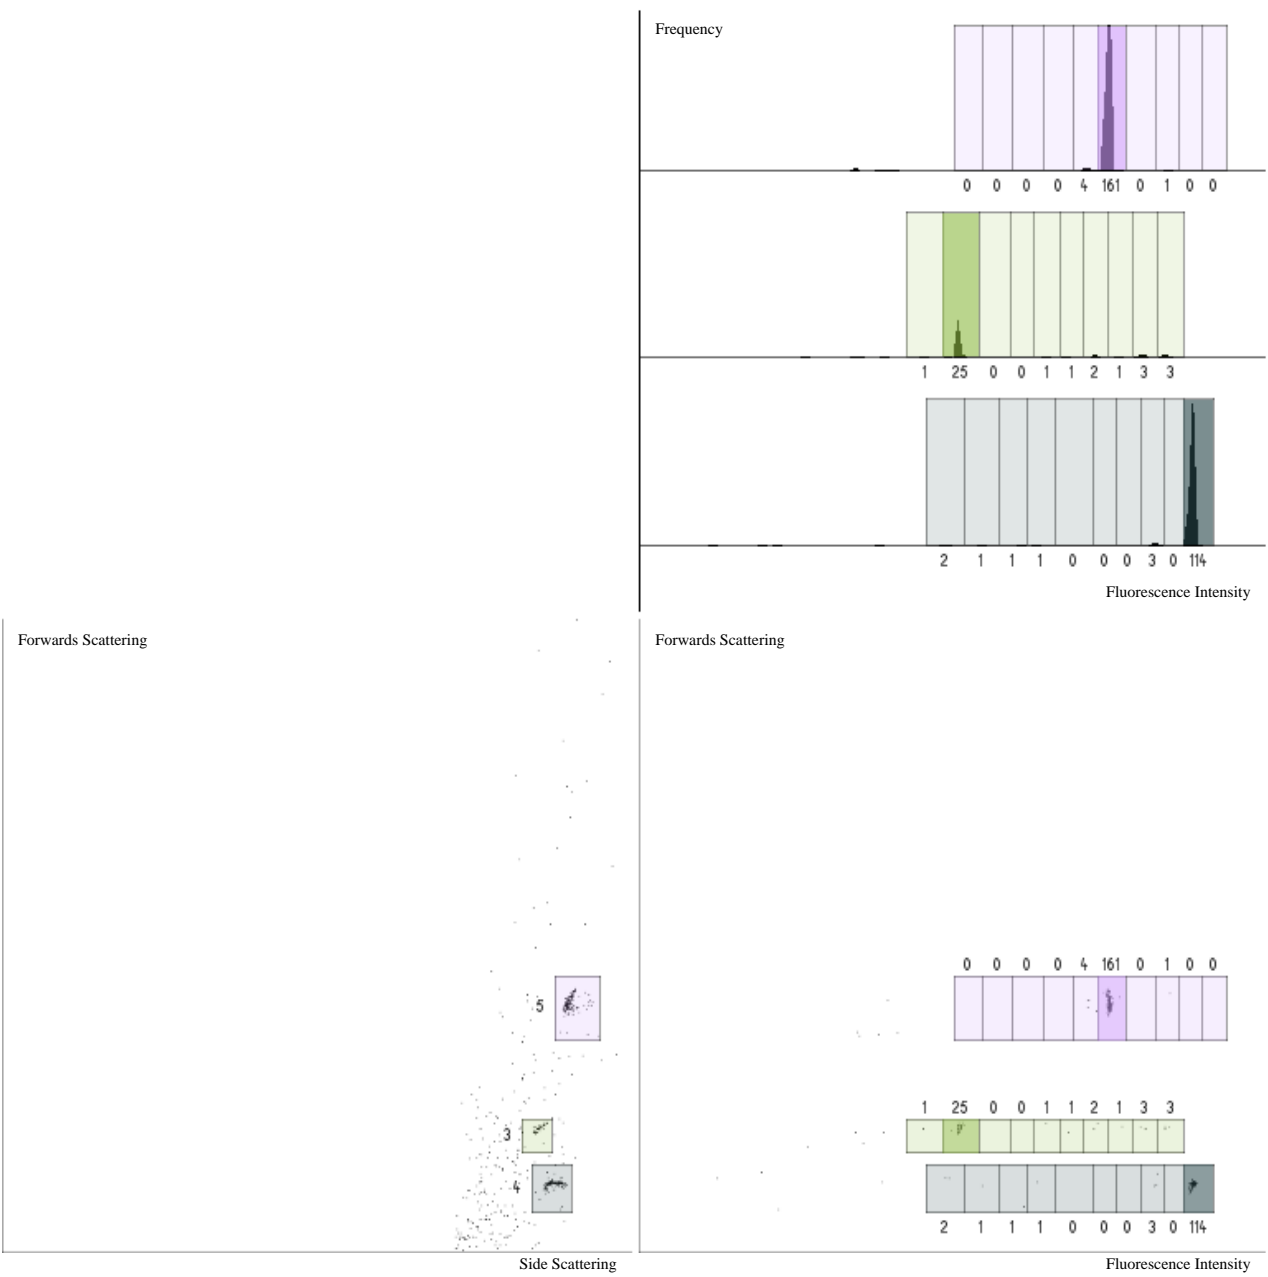

ANNEX 3: TAG DECONVOLUTION - BEAD 74

Passes flow sorting criteria: Yes  
Passes tag deconvolution criteria: No  
Included in protocol analysis: No  
Protocol: N/A  
Filename: Bin1\_plateA0\_G10.fcs  
Split 1: Petrol shading  
Split 2: Green shading  
Split 3: Violet shading

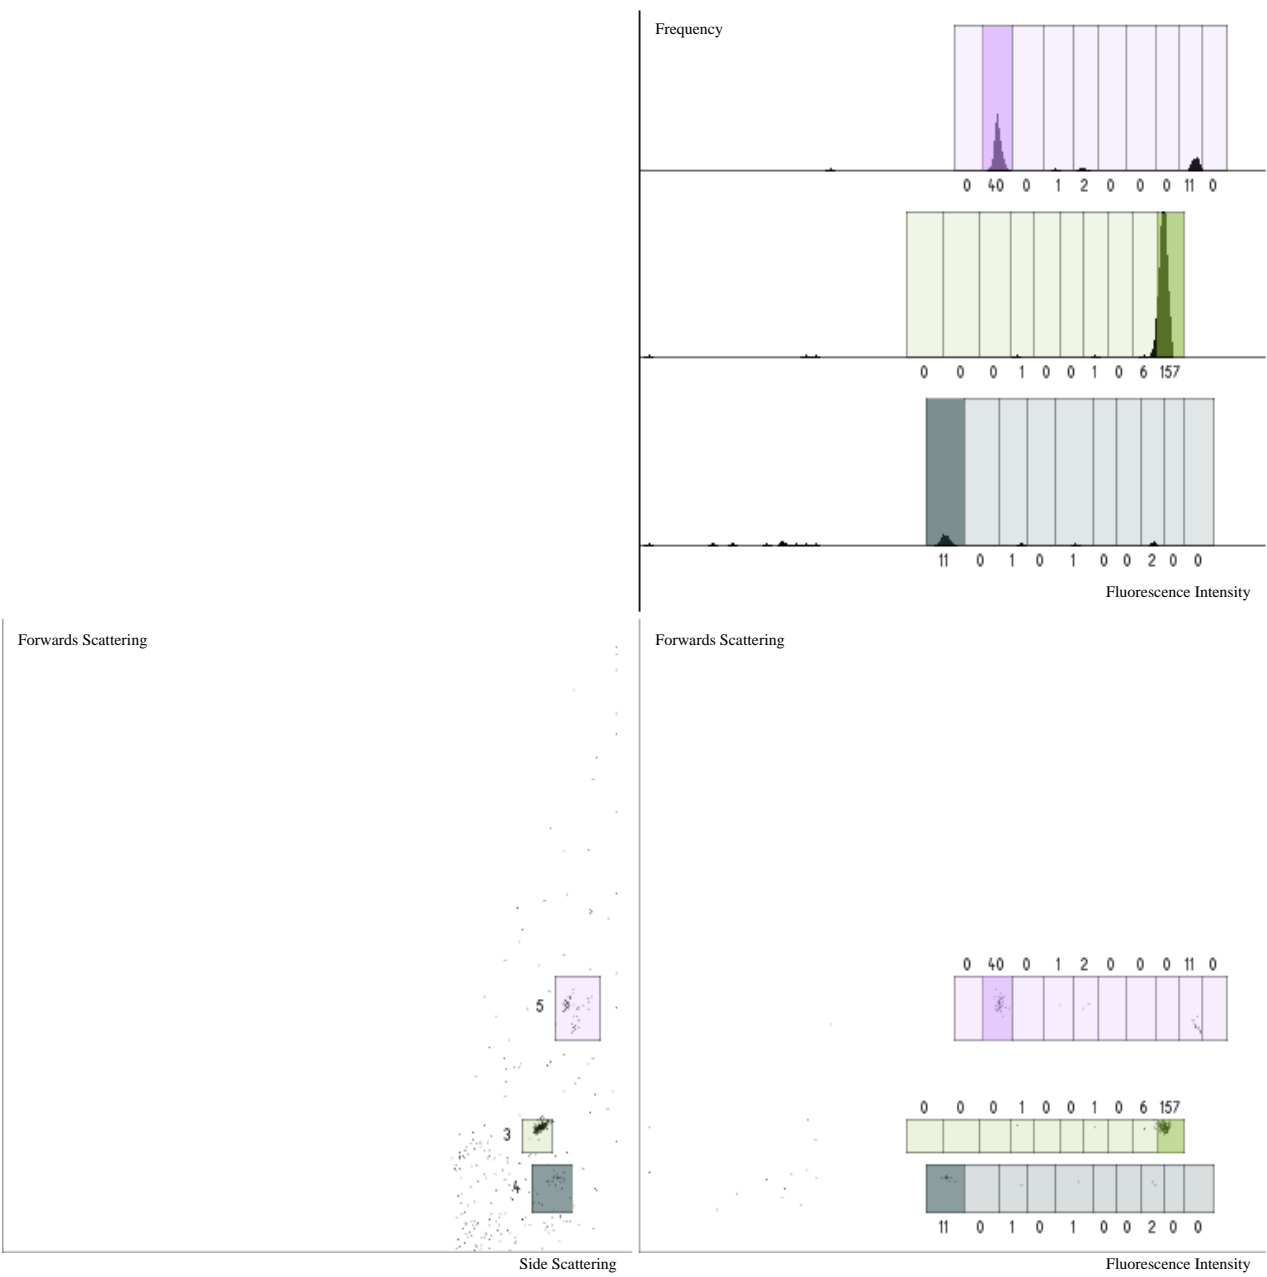

ANNEX 3: TAG DECONVOLUTION - BEAD 75

Passes flow sorting criteria: Yes  
Passes tag deconvolution criteria: Yes  
Included in protocol analysis: Yes  
Protocol: 9, 9, 9, 1  
Filename: Bin1\_plateA0\_H7.fcs  
Split 1: Petrol shading  
Split 2: Green shading  
Split 3: Violet shading

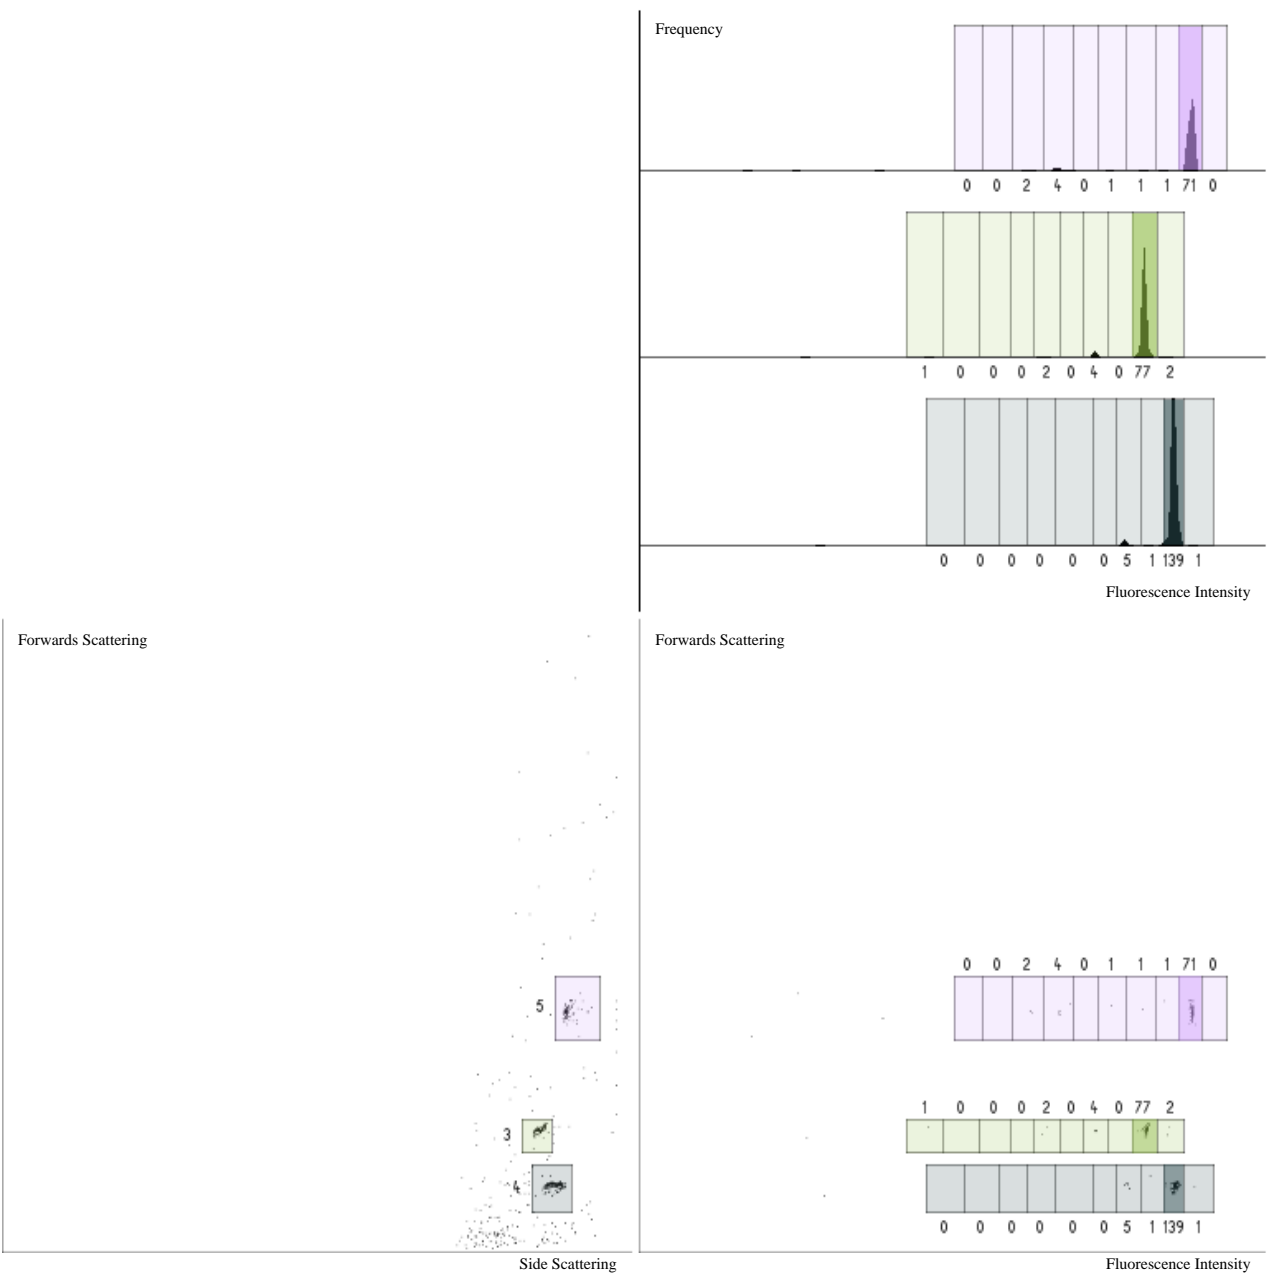

ANNEX 3: TAG DECONVOLUTION - BEAD 76

Passes flow sorting criteria: Yes  
Passes tag deconvolution criteria: No  
Included in protocol analysis: No  
Protocol: N/A  
Filename: Bin1\_plateA0\_H8.fcs  
Split 1: Petrol shading  
Split 2: Green shading  
Split 3: Violet shading

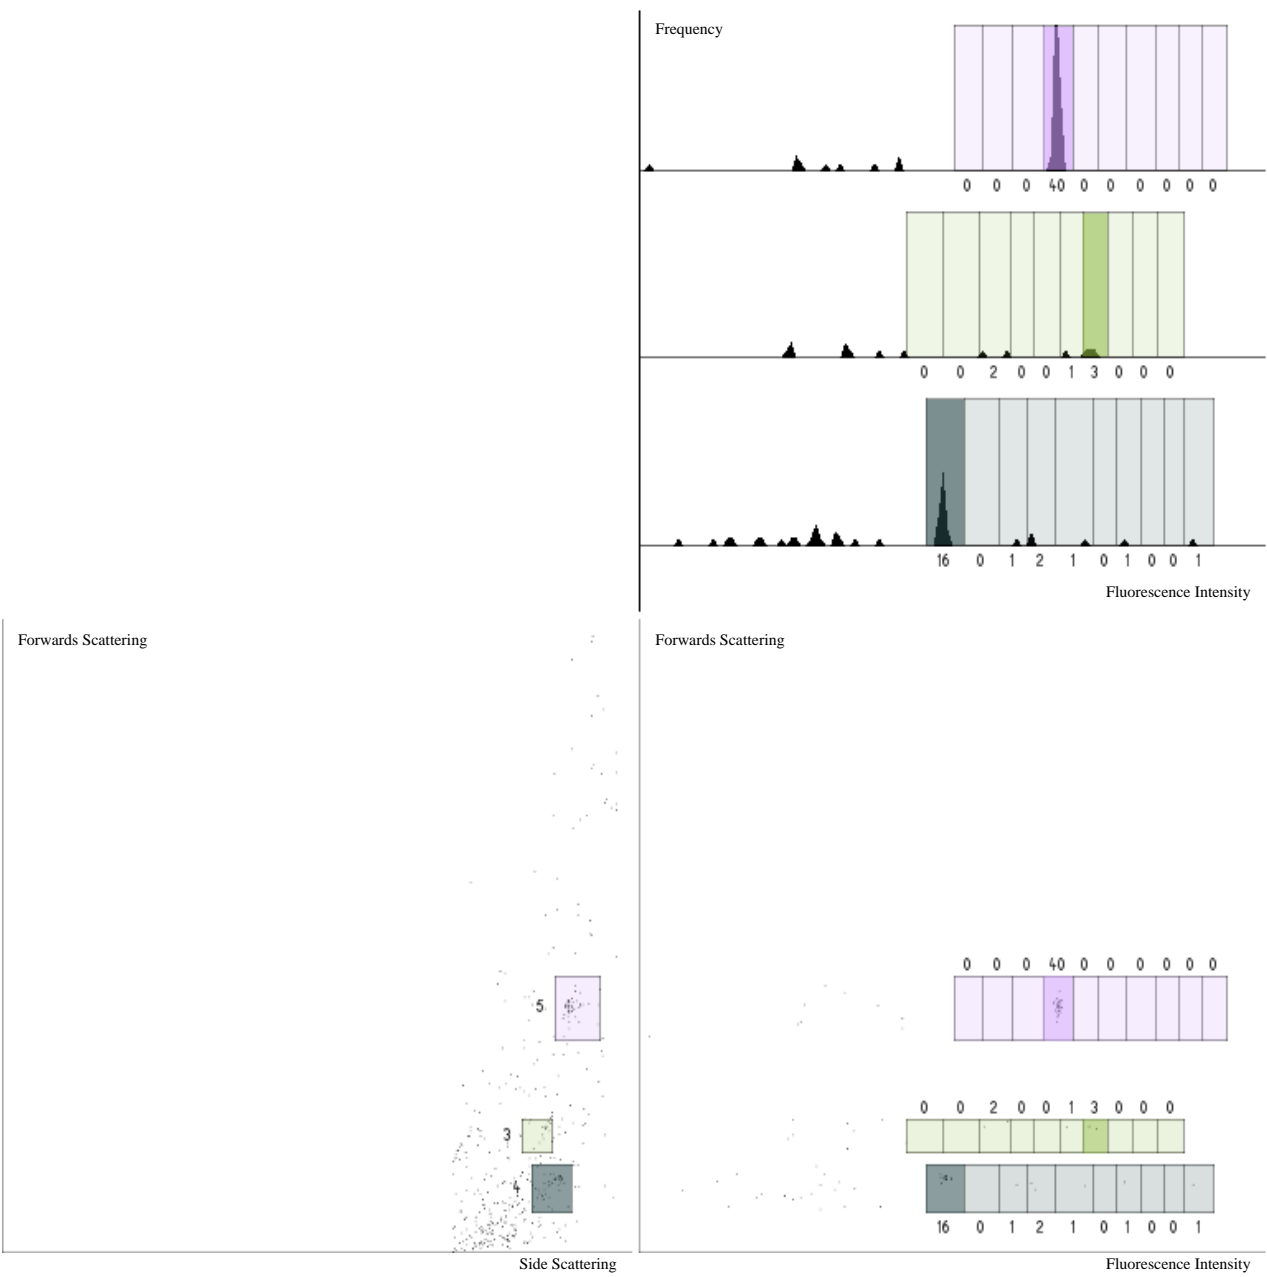

ANNEX 3: TAG DECONVOLUTION - BEAD 77

Passes flow sorting criteria: Yes  
Passes tag deconvolution criteria: Yes  
Included in protocol analysis: Yes  
Protocol: 4, 6, 7, 1  
Filename: Bin1\_plateA0\_H9.fcs  
Split 1: Petrol shading  
Split 2: Green shading  
Split 3: Violet shading

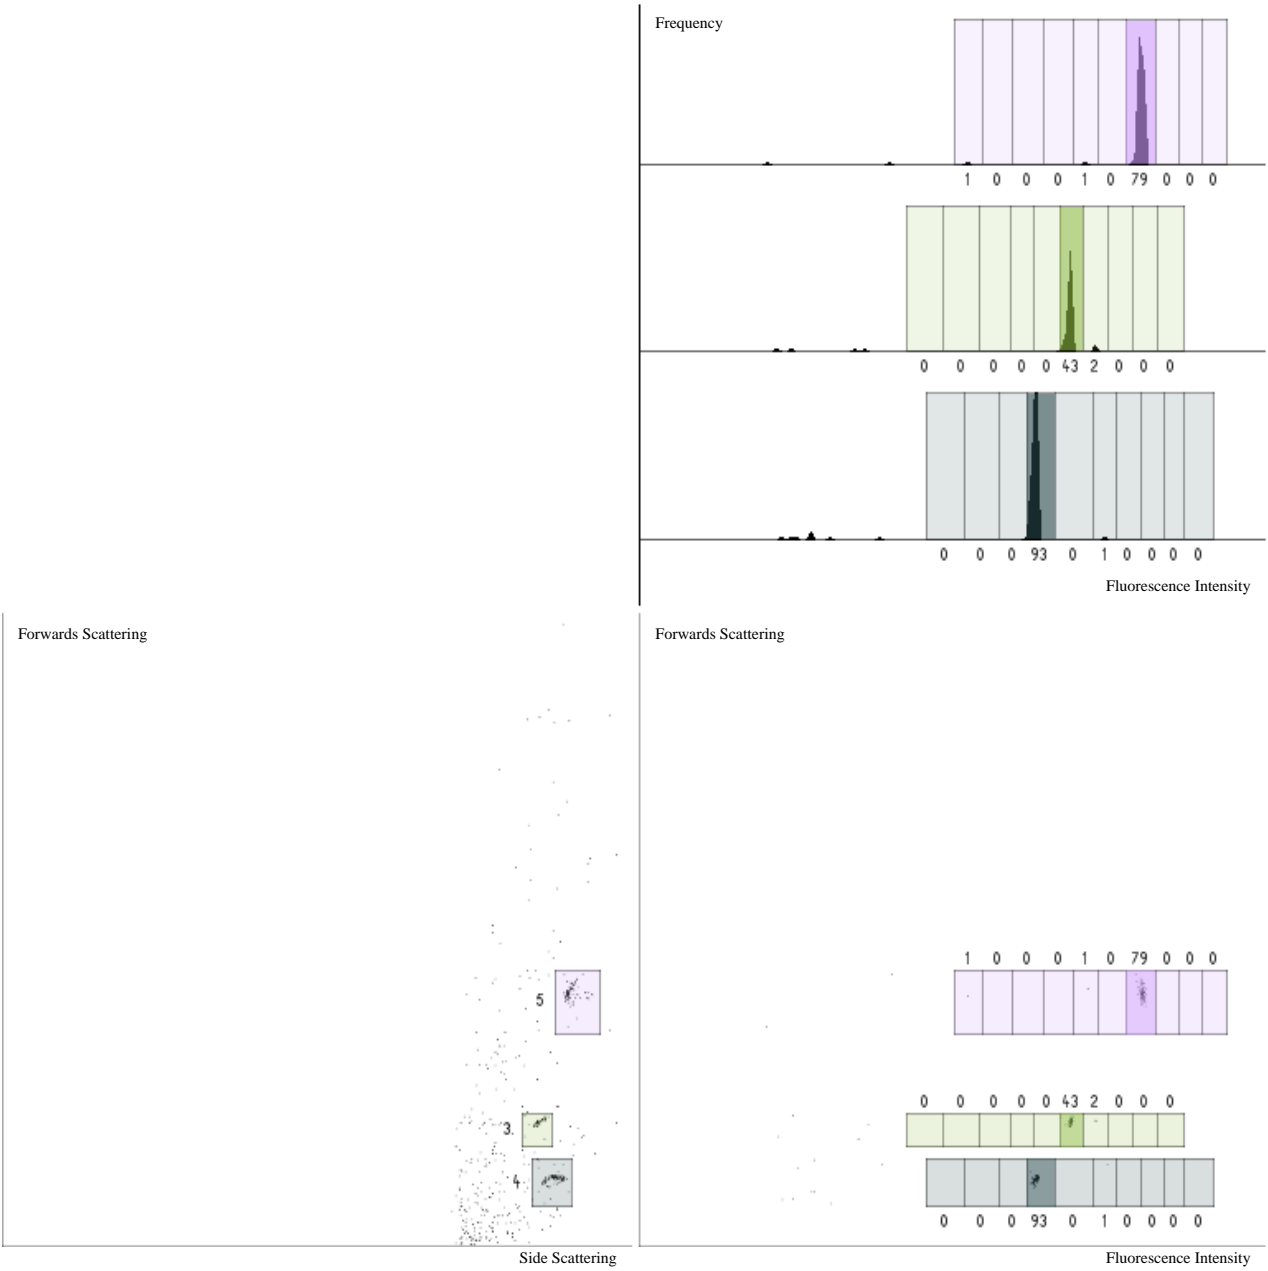

ANNEX 3: TAG DECONVOLUTION - BEAD 78

Passes flow sorting criteria: Yes  
Passes tag deconvolution criteria: Yes  
Included in protocol analysis: Yes  
Protocol: 9, 3, 10, 1  
Filename: Bin1\_plateA0\_H12.fcs  
Split 1: Petrol shading  
Split 2: Green shading  
Split 3: Violet shading

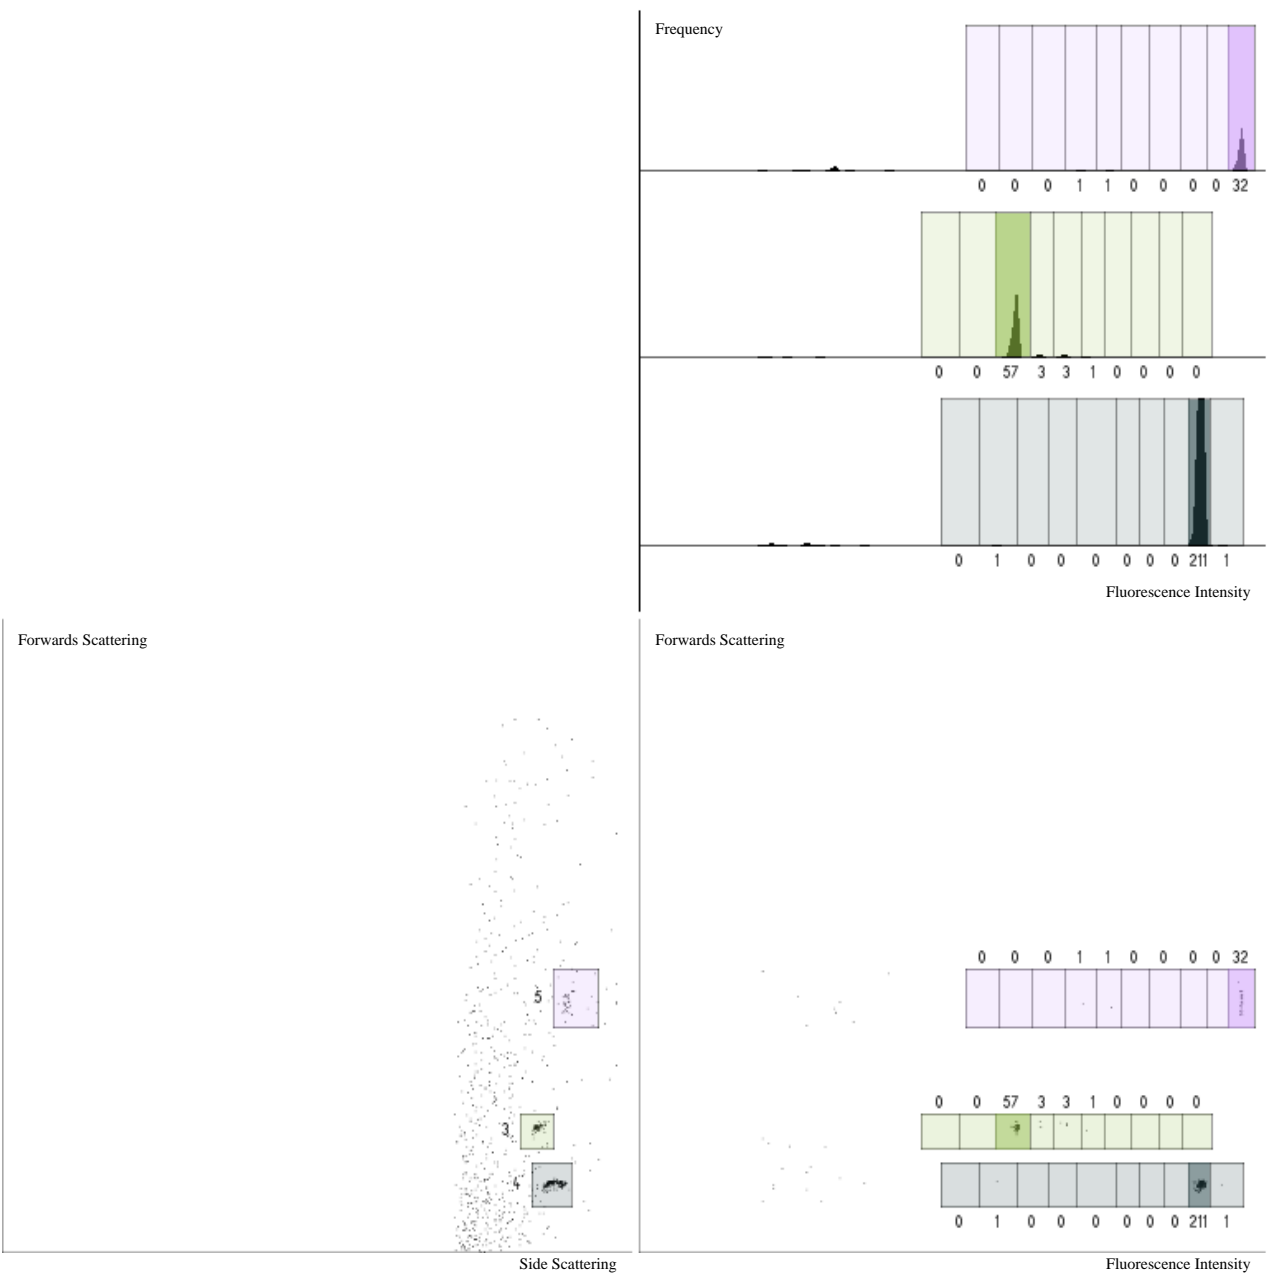



ANNEX 3: TAG DECONVOLUTION - BEAD 79

Passes flow sorting criteria: Yes  
Passes tag deconvolution criteria: Yes  
Included in protocol analysis: Yes  
Protocol: 3, 6, 1, 1  
Filename: Bin1\_plateA0\_A11.fcs  
Split 1: Petrol shading  
Split 2: Green shading  
Split 3: Violet shading

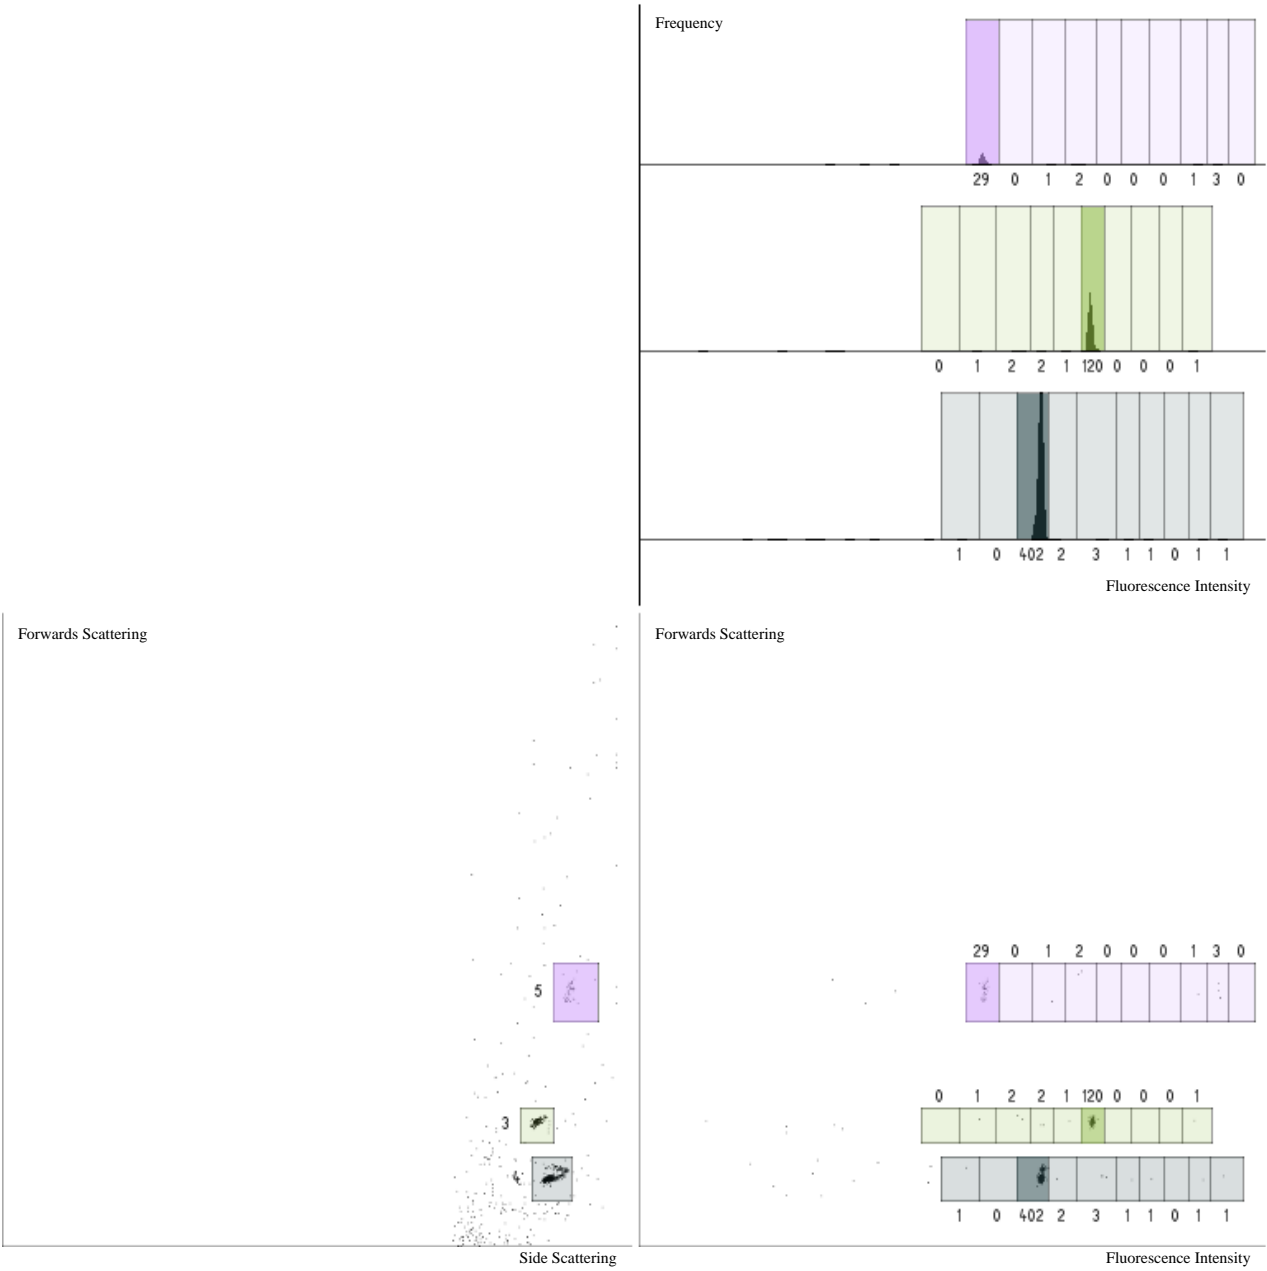

ANNEX 3: TAG DECONVOLUTION - BEAD 80

Passes flow sorting criteria: Yes  
Passes tag deconvolution criteria: Yes  
Included in protocol analysis: Yes  
Protocol: 2, 5, 9, 1  
Filename: Bin1\_plateA0\_A12.fcs  
Split 1: Petrol shading  
Split 2: Green shading  
Split 3: Violet shading

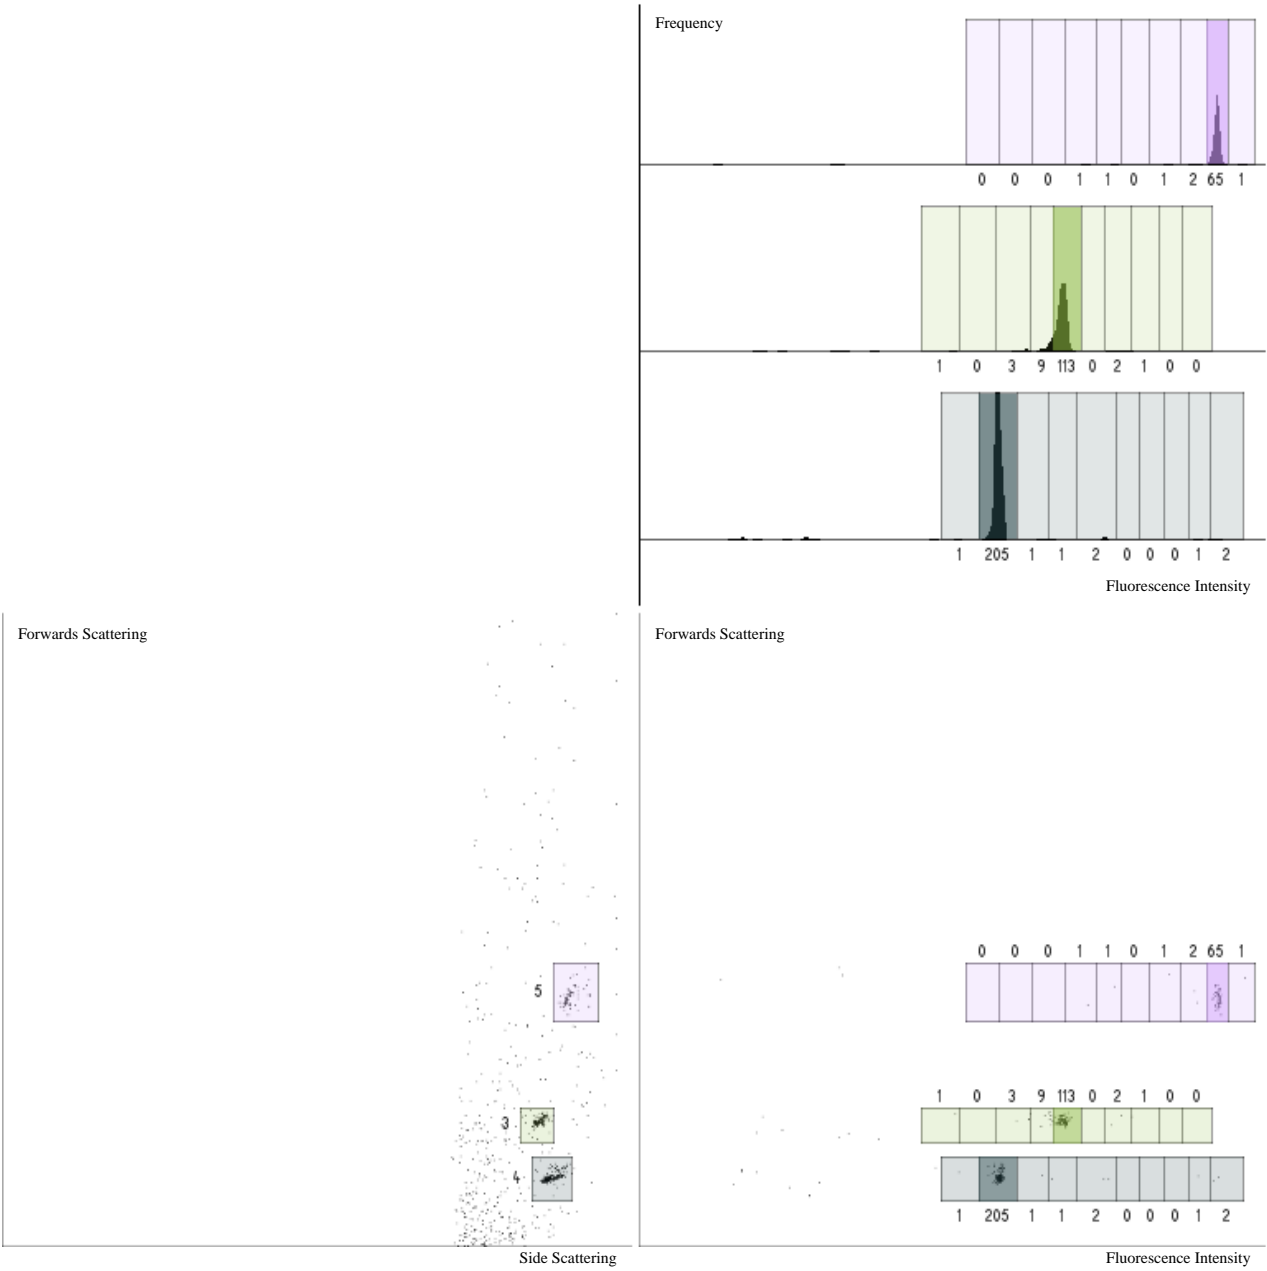

ANNEX 3: TAG DECONVOLUTION - BEAD 81

Passes flow sorting criteria: Yes  
Passes tag deconvolution criteria: Yes  
Included in protocol analysis: Yes  
Protocol: 9, 4, 6, 1  
Filename: Bin1\_plateA0\_B11.fcs  
Split 1: Petrol shading  
Split 2: Green shading  
Split 3: Violet shading

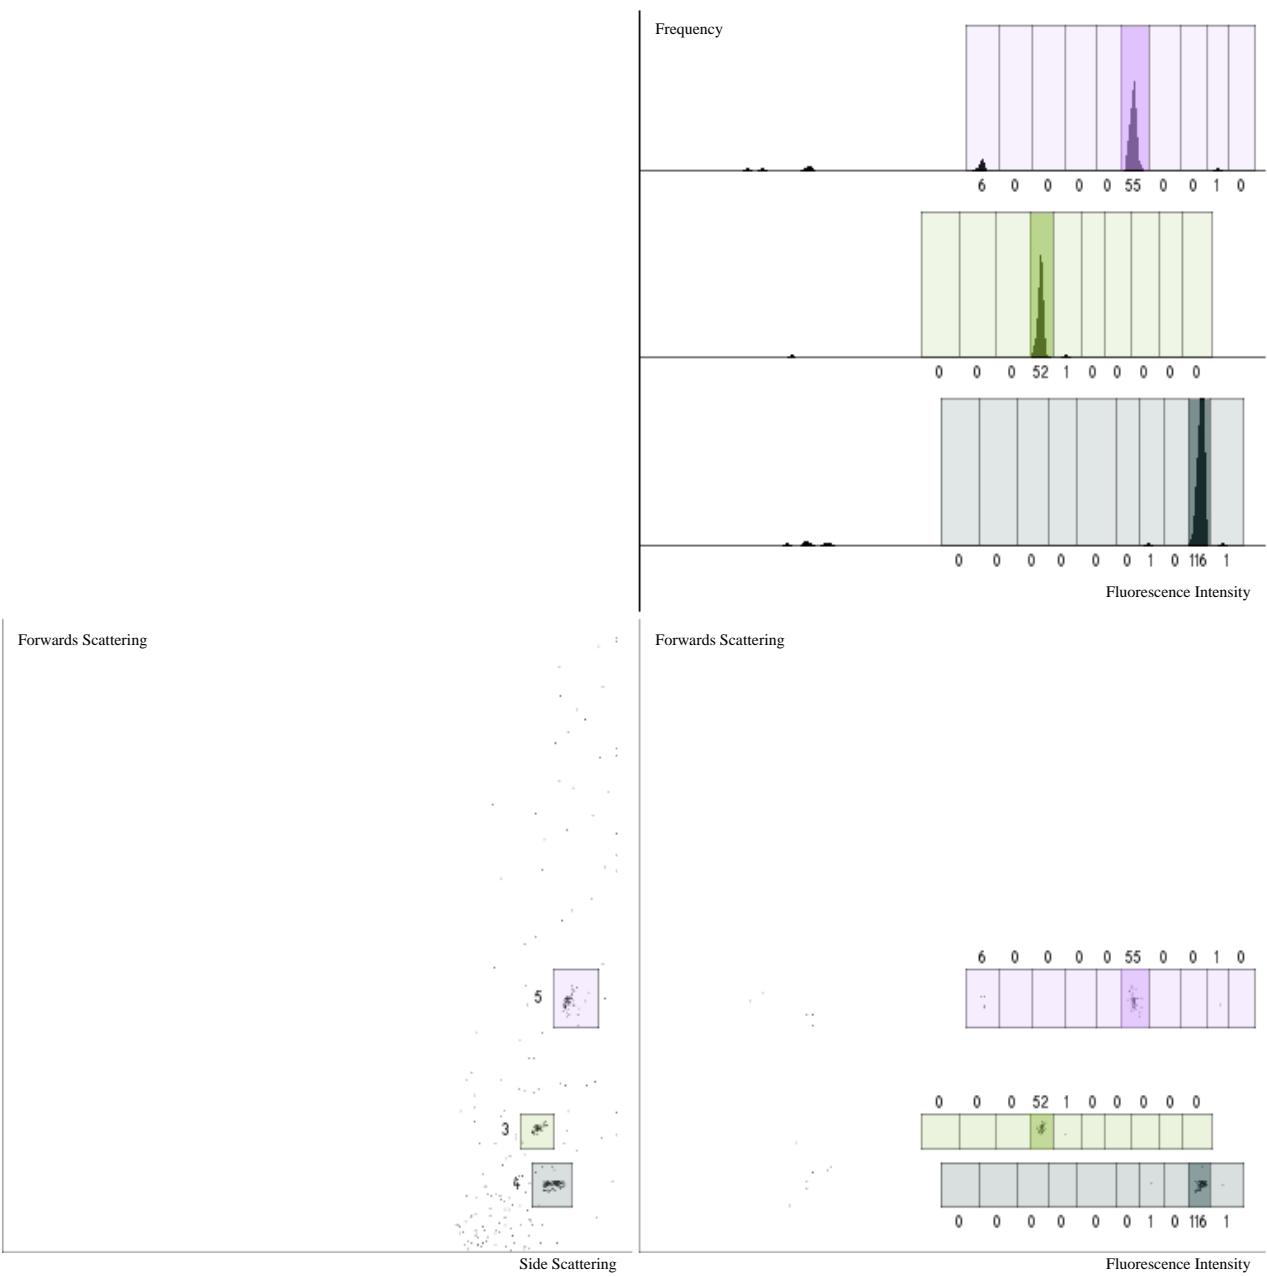

ANNEX 3: TAG DECONVOLUTION - BEAD 82

Passes flow sorting criteria: Yes  
Passes tag deconvolution criteria: Yes  
Included in protocol analysis: Yes  
Protocol: 10, 8, 10, 1  
Filename: Bin1\_plateA0\_B12.fcs  
Split 1: Petrol shading  
Split 2: Green shading  
Split 3: Violet shading

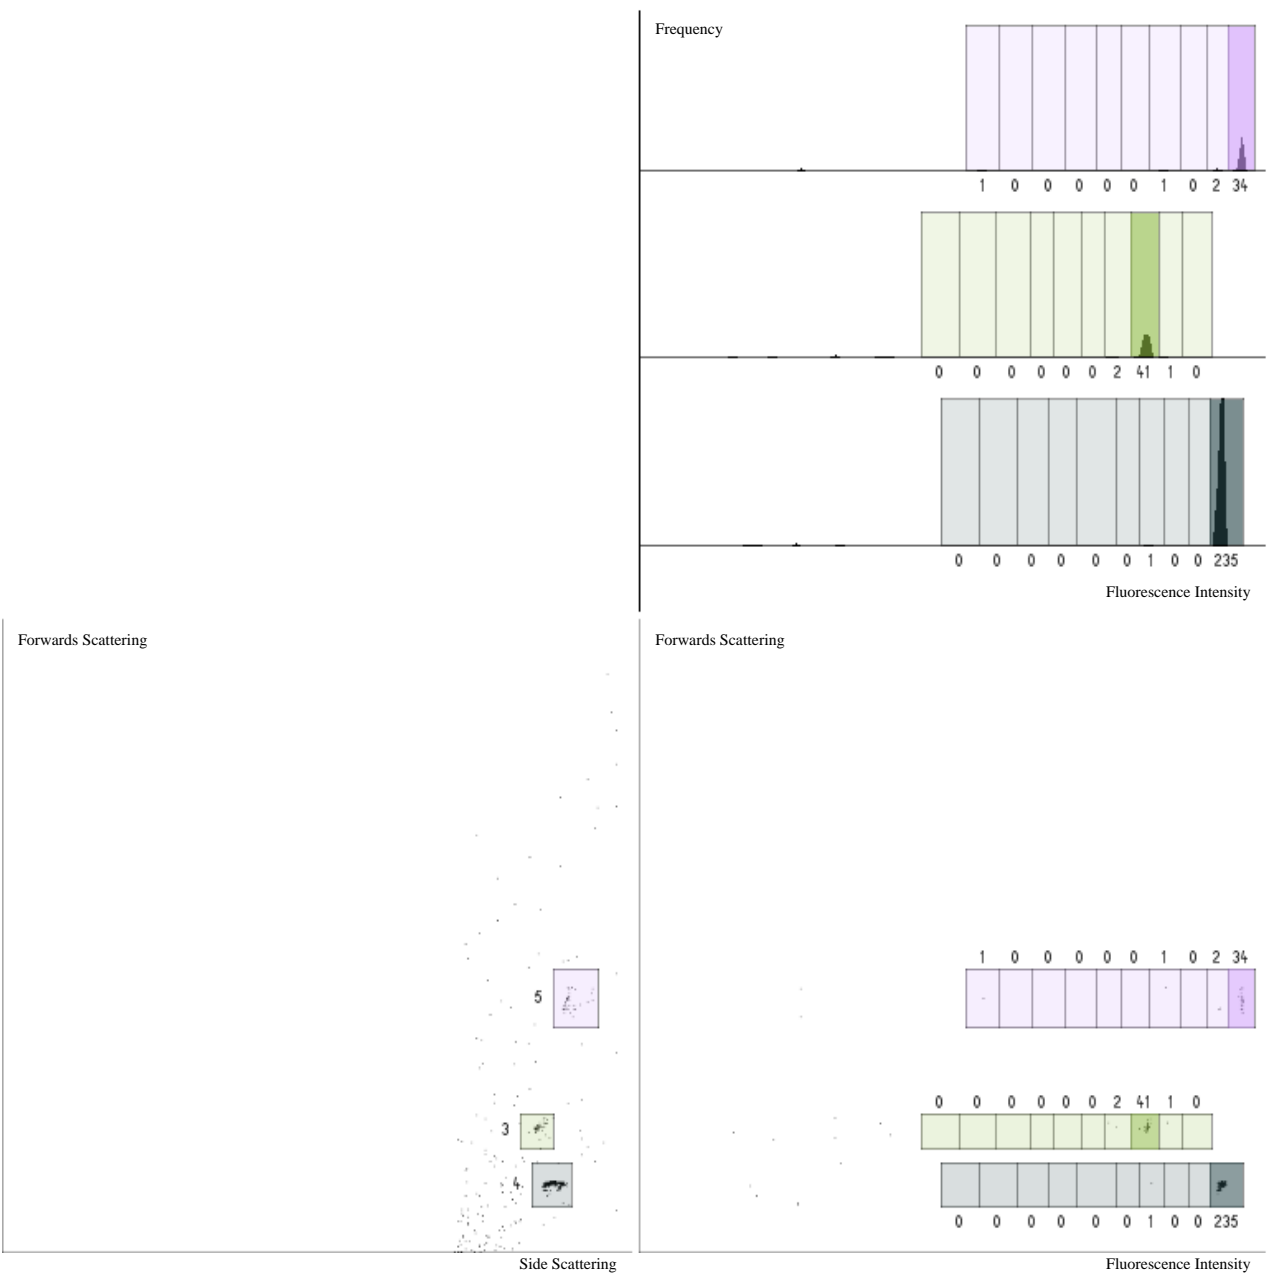

ANNEX 3: TAG DECONVOLUTION - BEAD 83

Passes flow sorting criteria: Yes  
Passes tag deconvolution criteria: Yes  
Included in protocol analysis: Yes  
Protocol: 4, 6, 6, 1  
Filename: Bin1\_plateA0\_C11.fcs  
Split 1: Petrol shading  
Split 2: Green shading  
Split 3: Violet shading

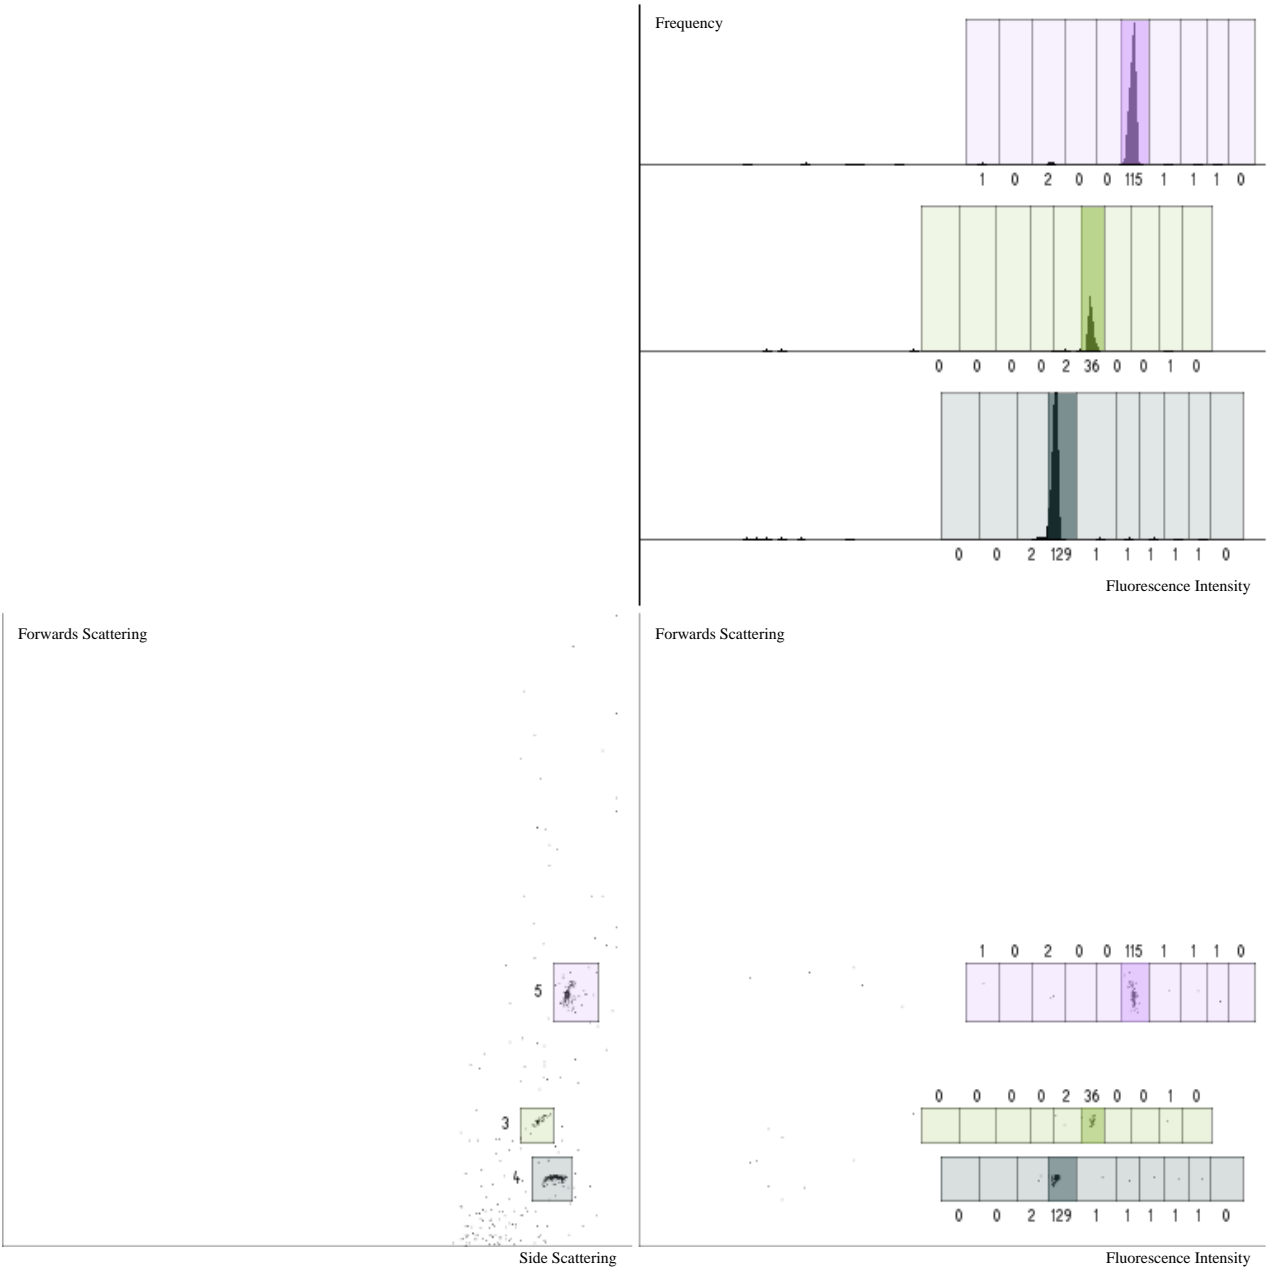

ANNEX 3: TAG DECONVOLUTION - BEAD 84

Passes flow sorting criteria: Yes  
Passes tag deconvolution criteria: Yes  
Included in protocol analysis: Yes  
Protocol: 2, 10, 5, 1  
Filename: Bin1\_plateA0\_C12.fcs  
Split 1: Petrol shading  
Split 2: Green shading  
Split 3: Violet shading

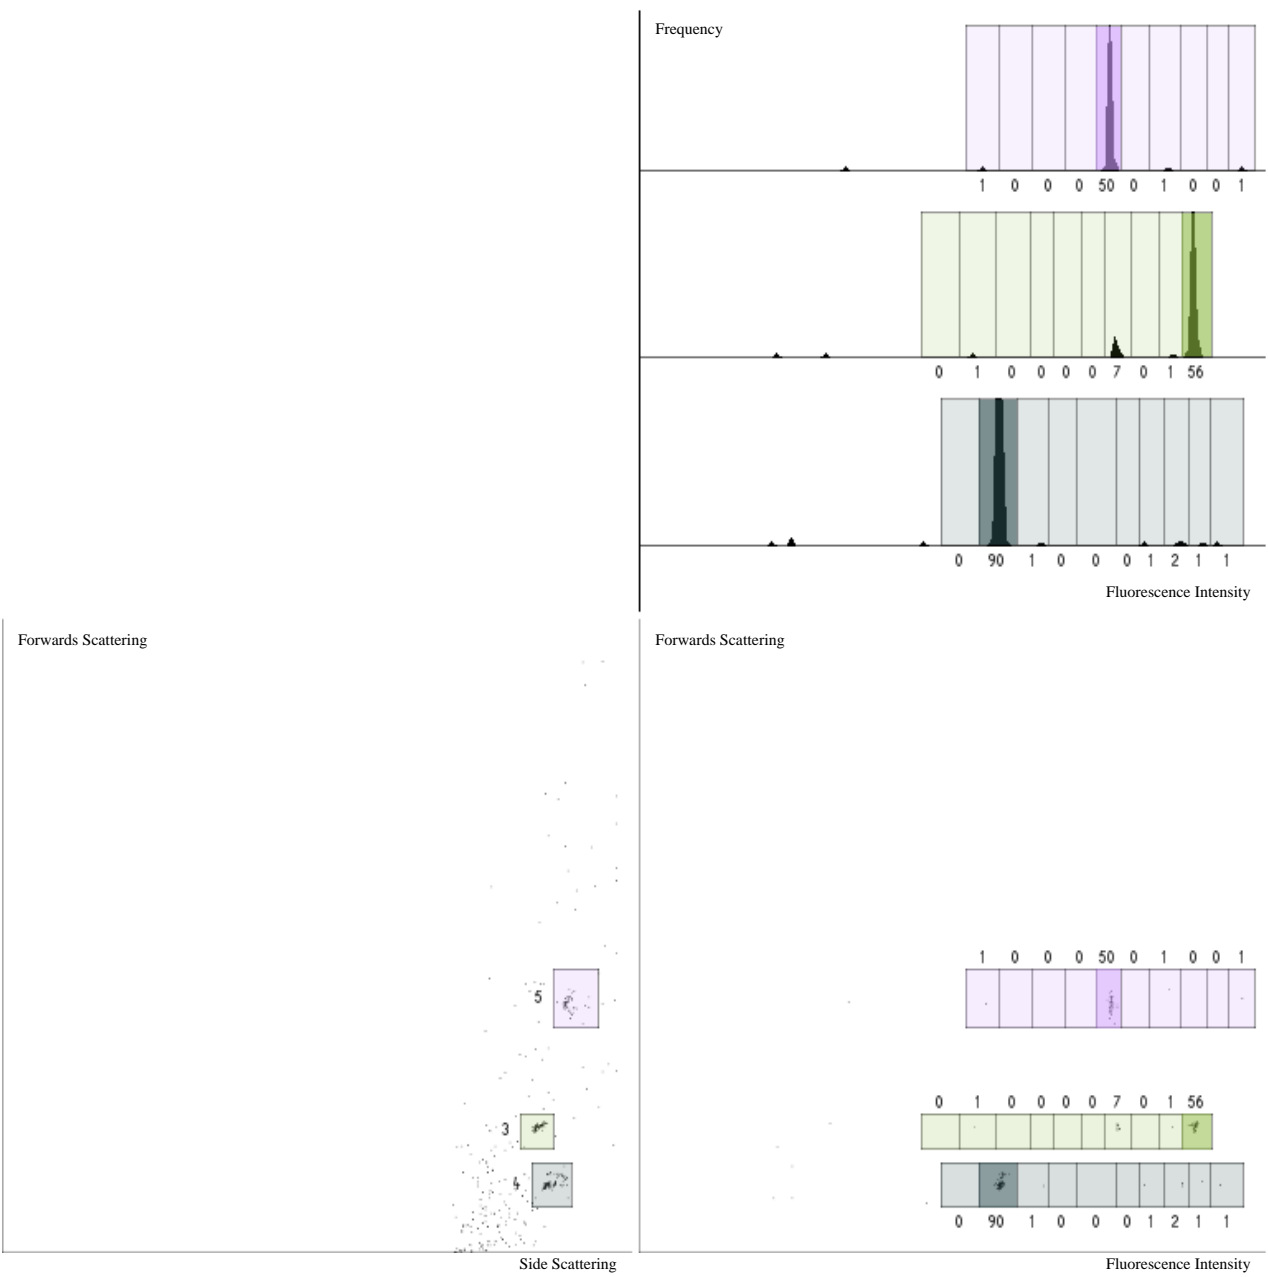

ANNEX 3: TAG DECONVOLUTION - BEAD 85

Passes flow sorting criteria: Yes  
Passes tag deconvolution criteria: Yes  
Included in protocol analysis: Yes  
Protocol: 8, 8, 2, 1  
Filename: Bin1\_plateA0\_D11.fcs  
Split 1: Petrol shading  
Split 2: Green shading  
Split 3: Violet shading

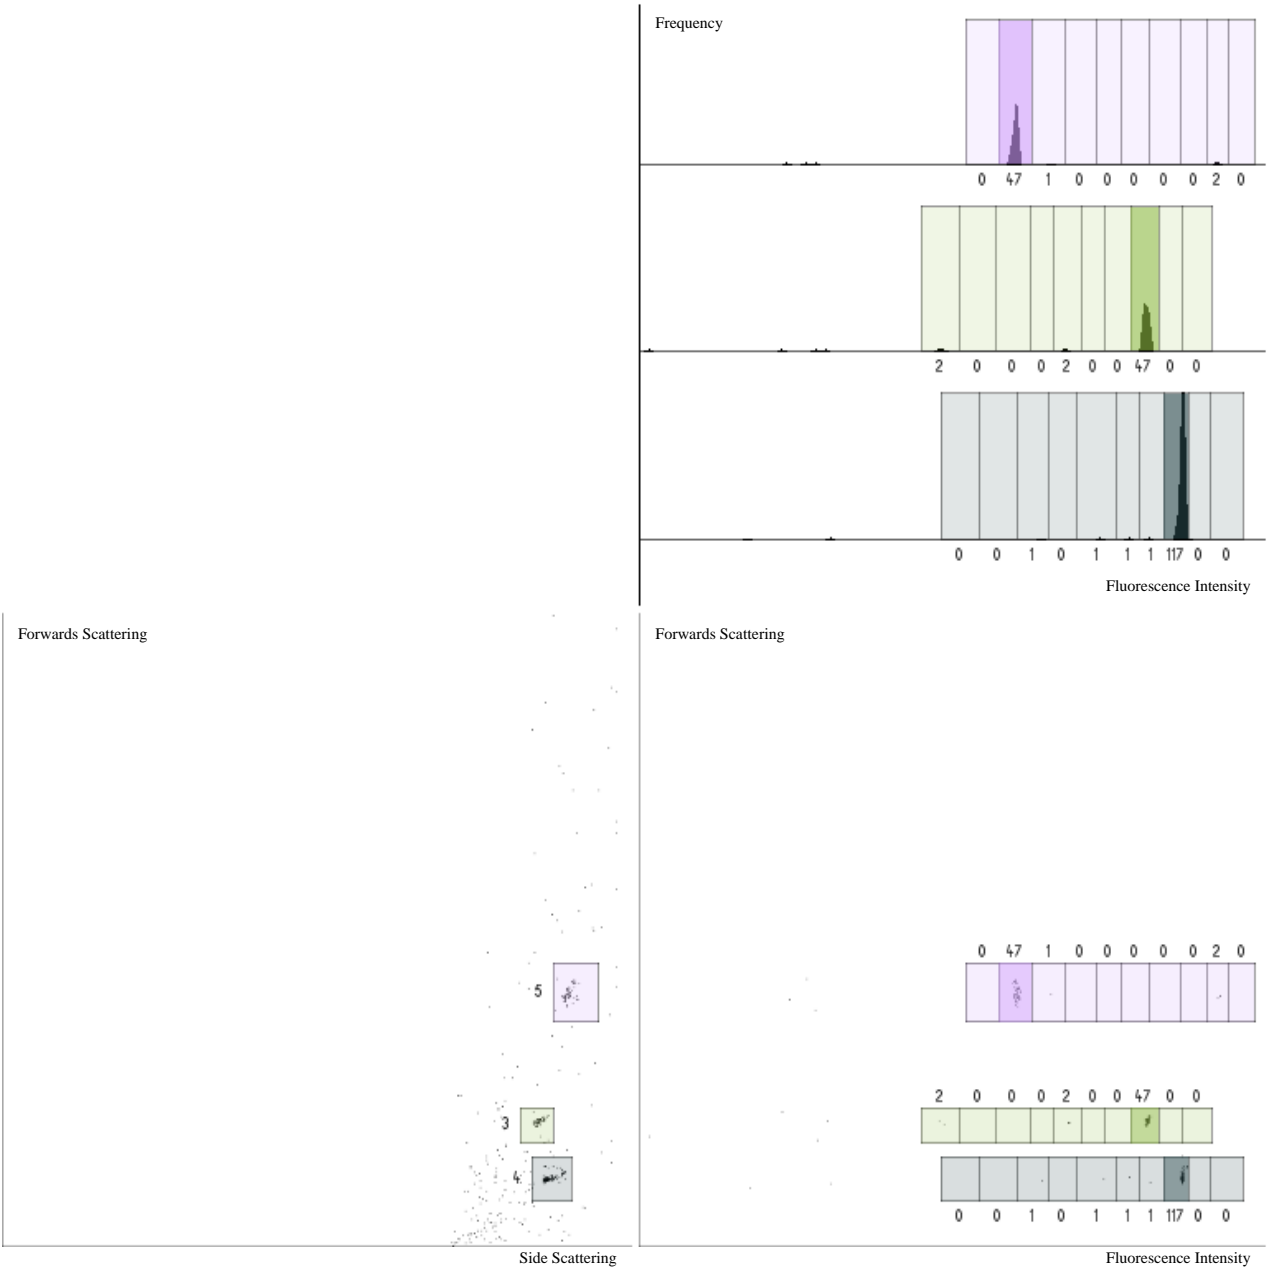

ANNEX 3: TAG DECONVOLUTION - BEAD 86

Passes flow sorting criteria: Yes  
Passes tag deconvolution criteria: Yes  
Included in protocol analysis: Yes  
Protocol: 1, 6, 2, 1  
Filename: Bin1\_plateA0\_D12.fcs  
Split 1: Petrol shading  
Split 2: Green shading  
Split 3: Violet shading

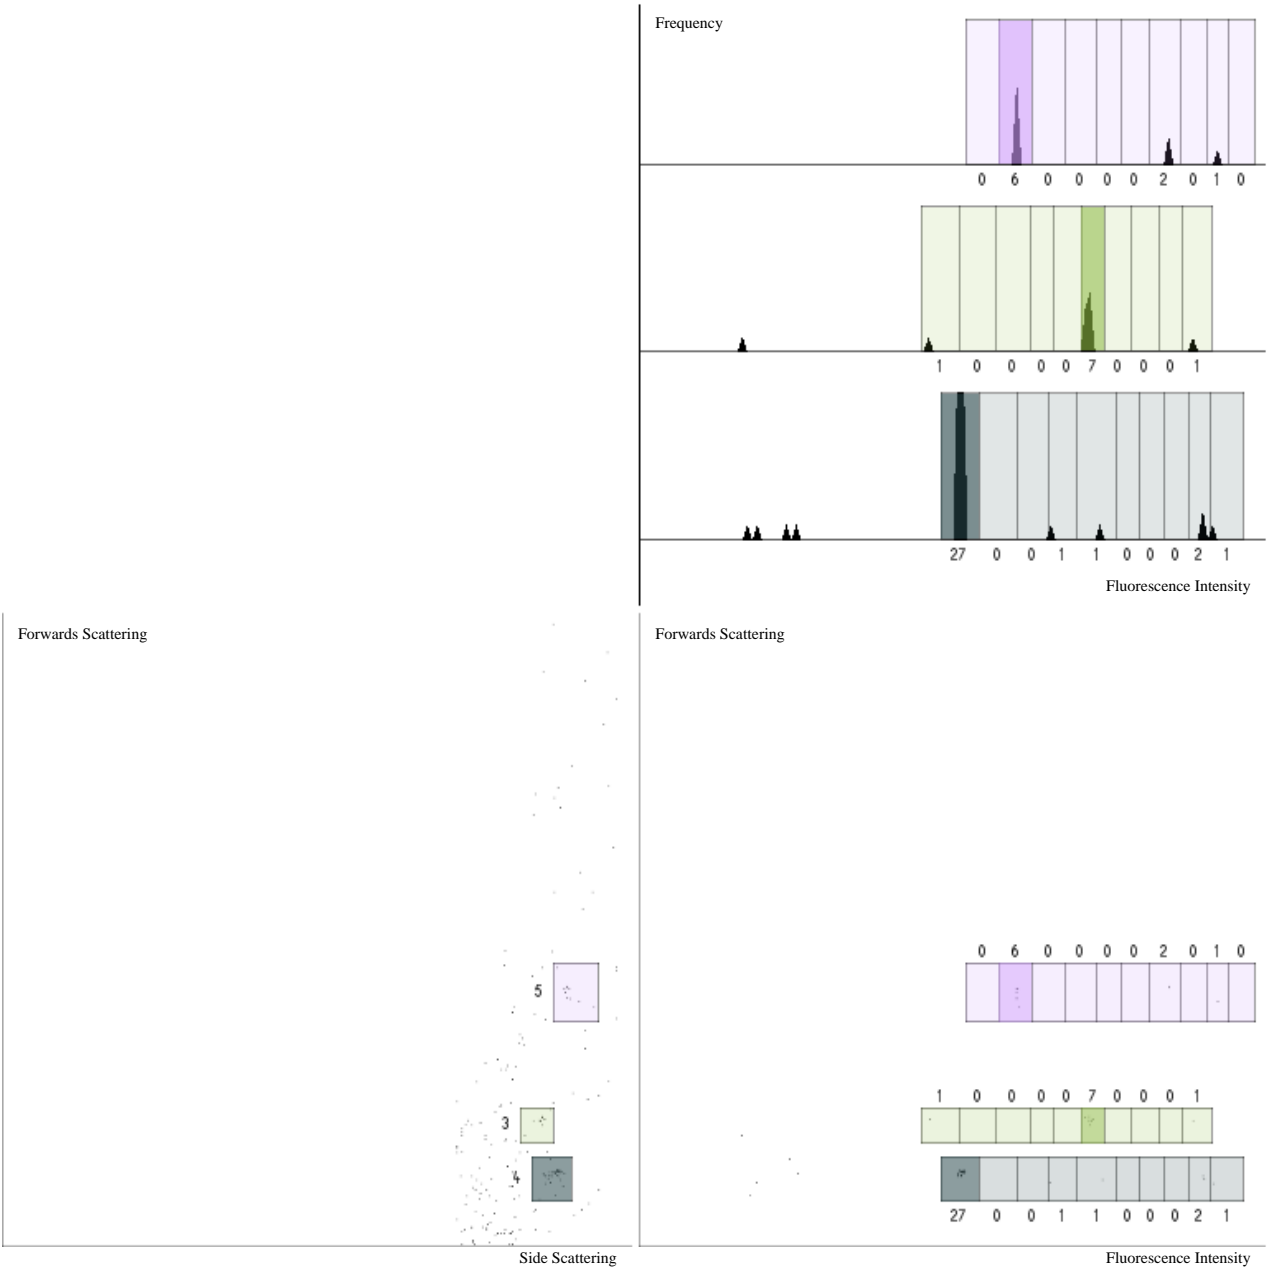



ANNEX 3: TAG DECONVOLUTION - BEAD 87

Passes flow sorting criteria: Yes  
Passes tag deconvolution criteria: Yes  
Included in protocol analysis: Yes  
Protocol: 6, 3, 7, 1  
Filename: Bin1\_plateA0\_E11.fcs  
Split 1: Petrol shading  
Split 2: Green shading  
Split 3: Violet shading

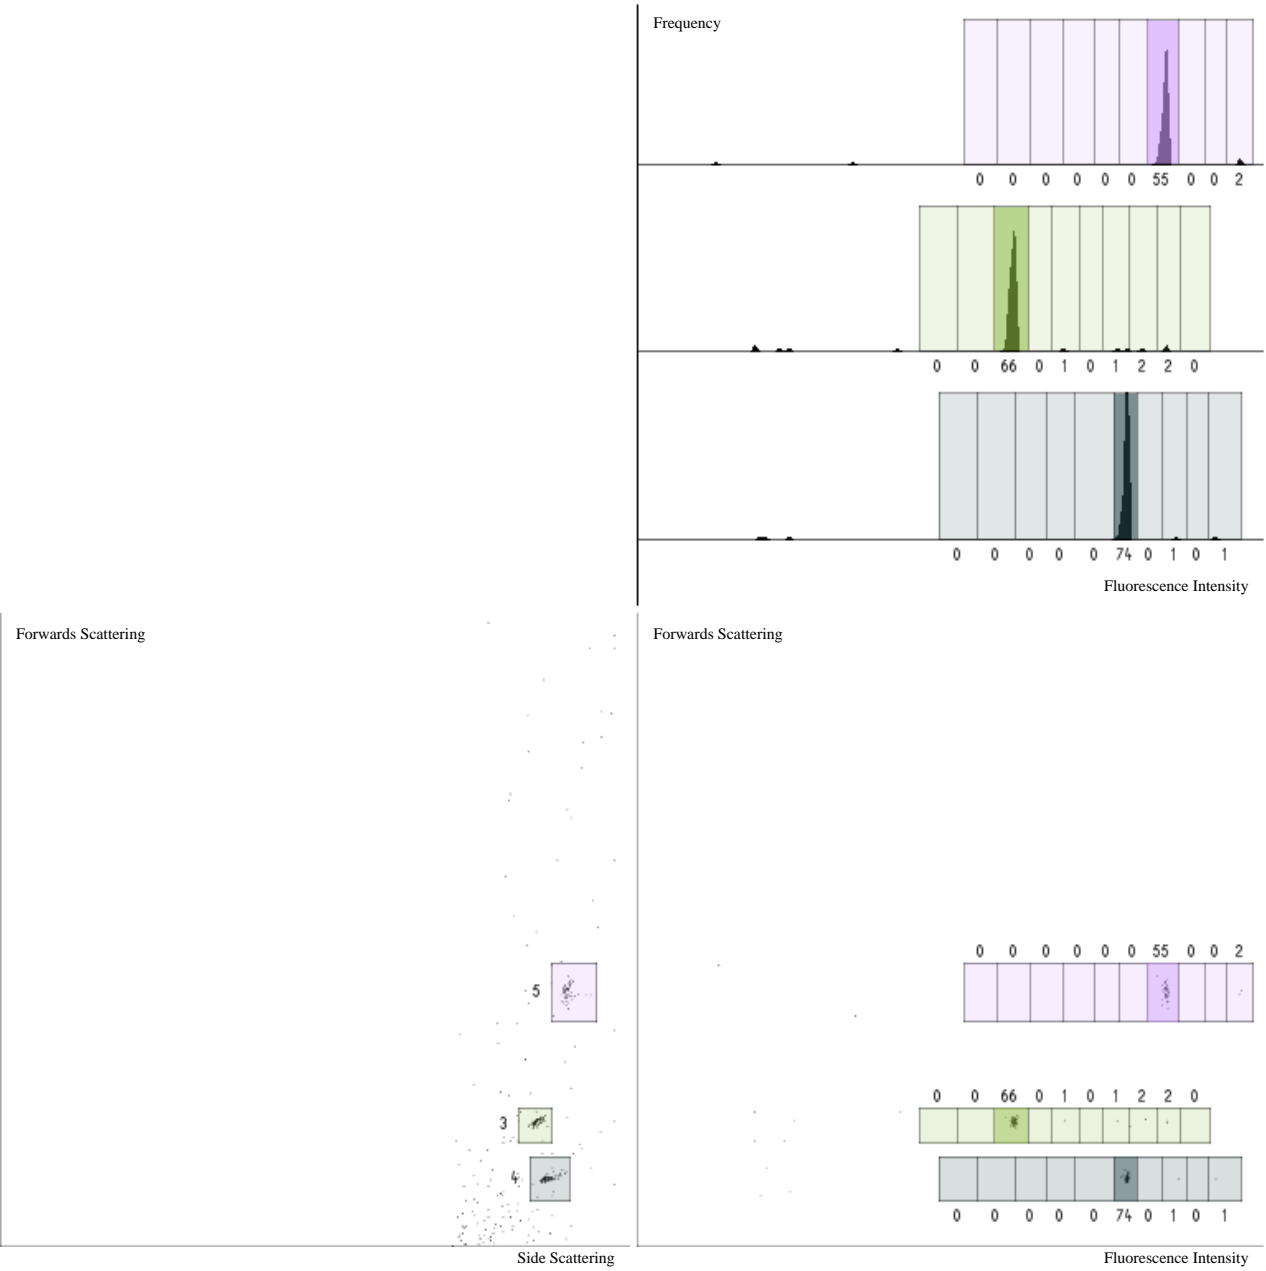

ANNEX 3: TAG DECONVOLUTION - BEAD 88

Passes flow sorting criteria: Yes  
Passes tag deconvolution criteria: Yes  
Included in protocol analysis: Yes  
Protocol: 8, 7, 10, 1  
Filename: Bin1\_plateA0\_E12.fcs  
Split 1: Petrol shading  
Split 2: Green shading  
Split 3: Violet shading

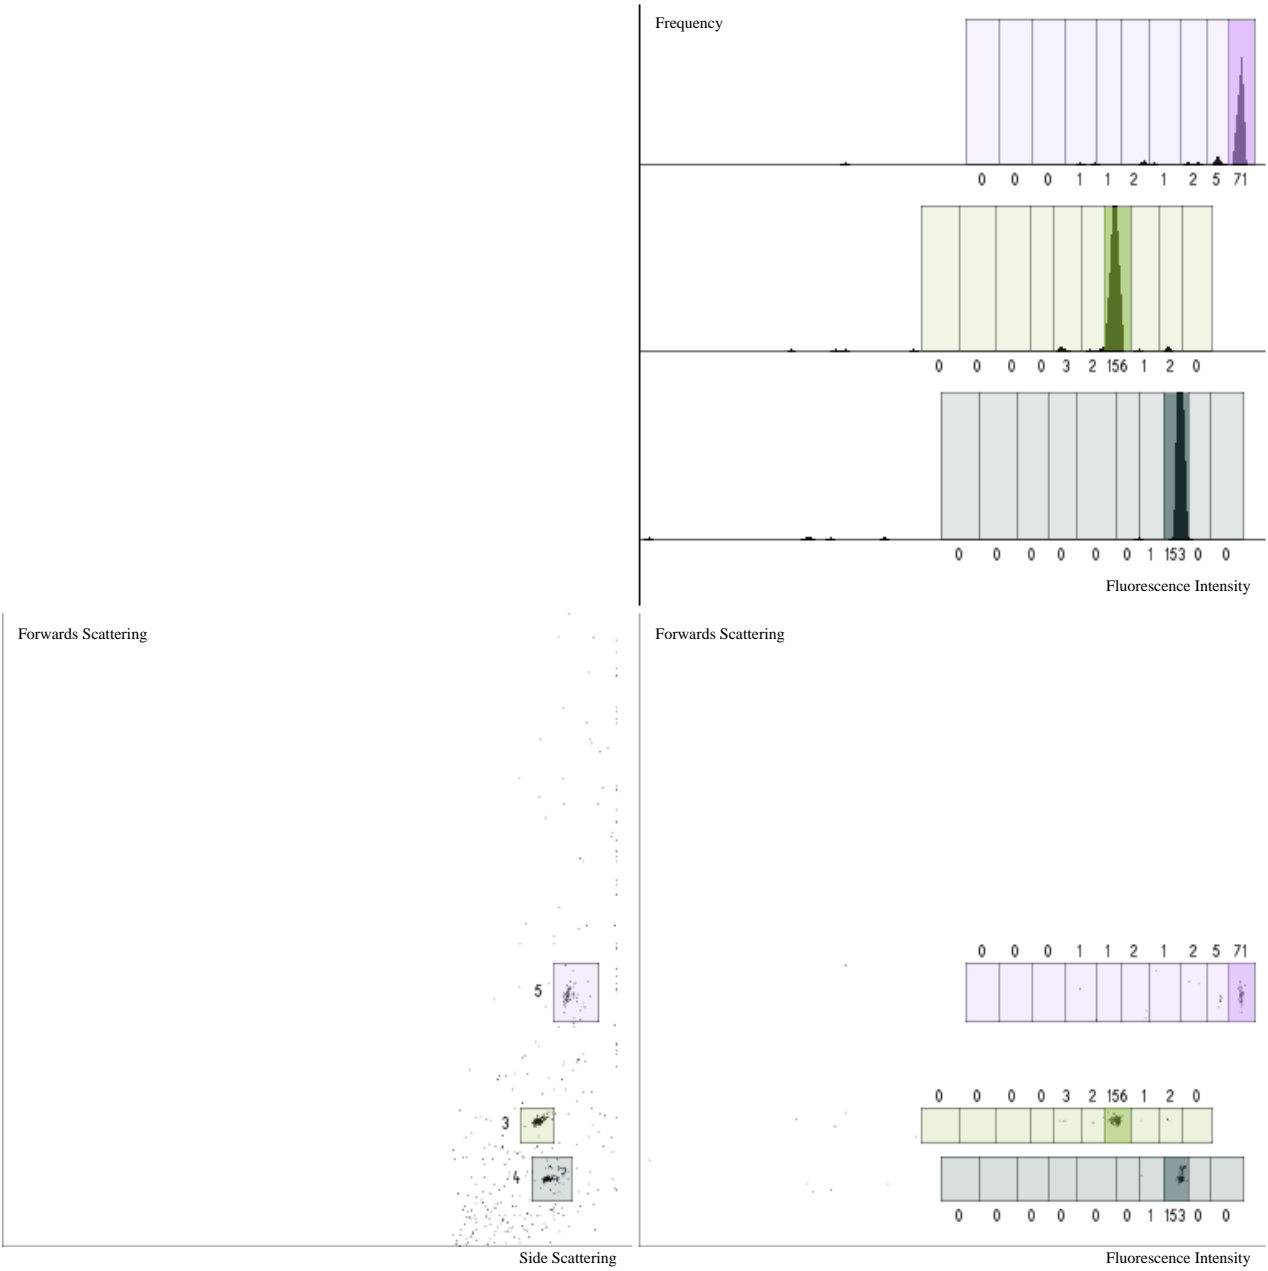

ANNEX 3: TAG DECONVOLUTION - BEAD 89

Passes flow sorting criteria: Yes  
Passes tag deconvolution criteria: Yes  
Included in protocol analysis: Yes  
Protocol: 3, 9, 3, 1  
Filename: Bin1\_plateA0\_F11.fcs  
Split 1: Petrol shading  
Split 2: Green shading  
Split 3: Violet shading

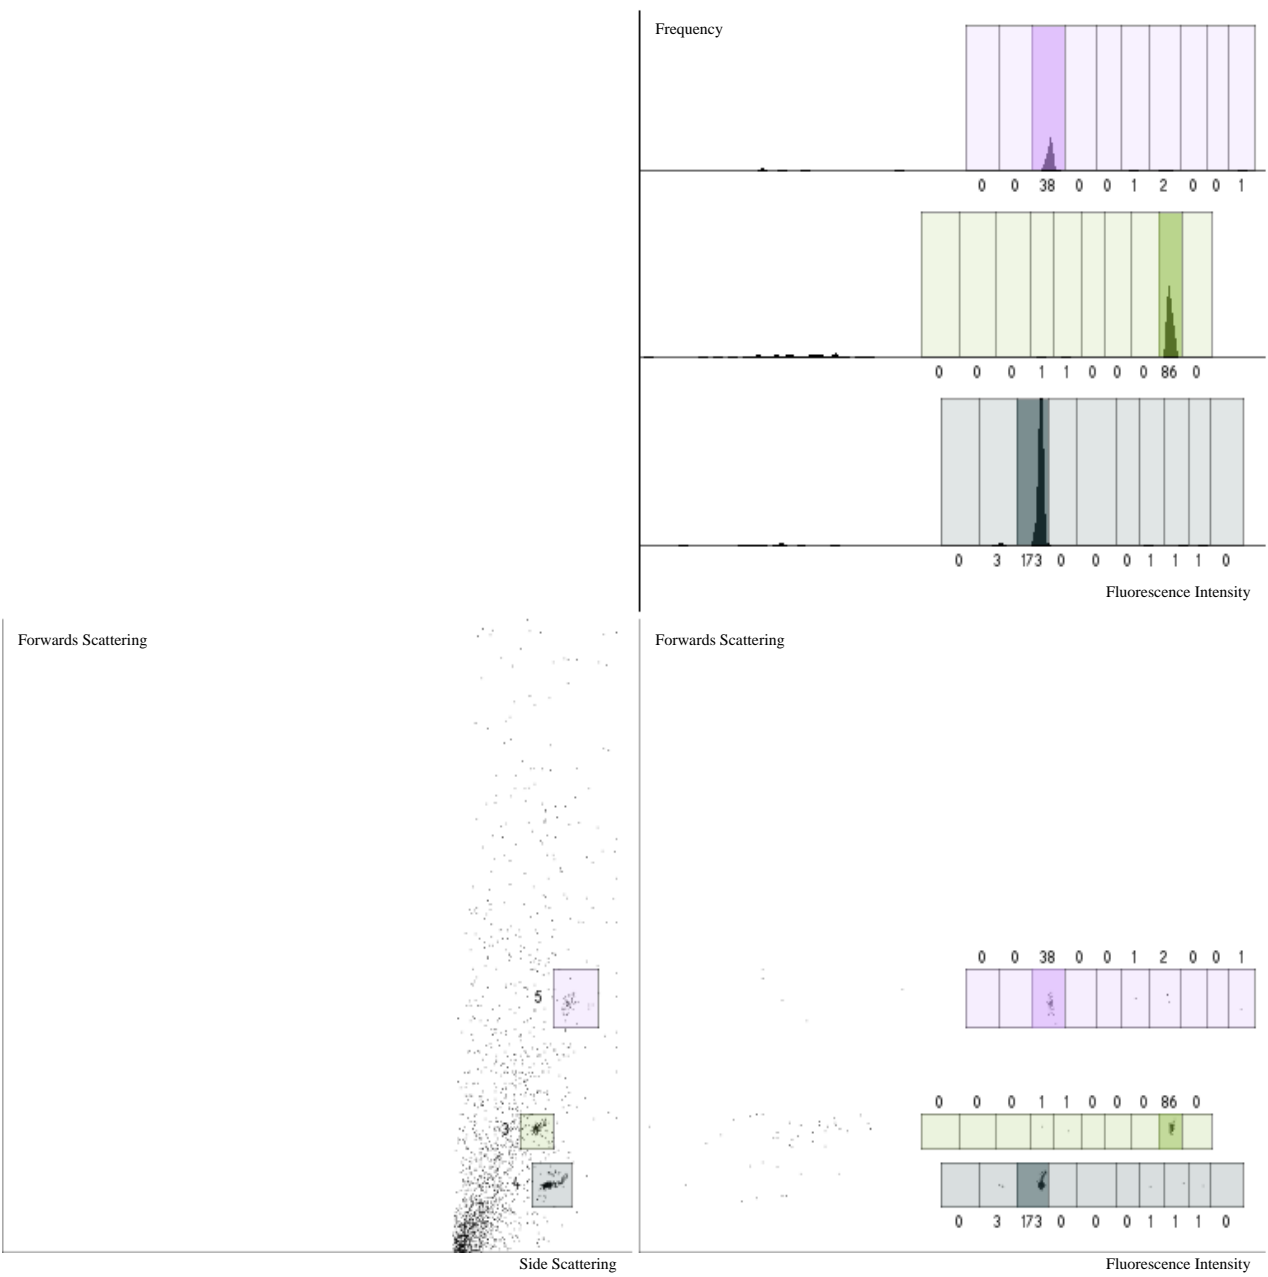

ANNEX 3: TAG DECONVOLUTION - BEAD 90

Passes flow sorting criteria: Yes  
Passes tag deconvolution criteria: Yes  
Included in protocol analysis: Yes  
Protocol: 6, 3, 9, 1  
Filename: Bin1\_plateA0\_F12.fcs  
Split 1: Petrol shading  
Split 2: Green shading  
Split 3: Violet shading

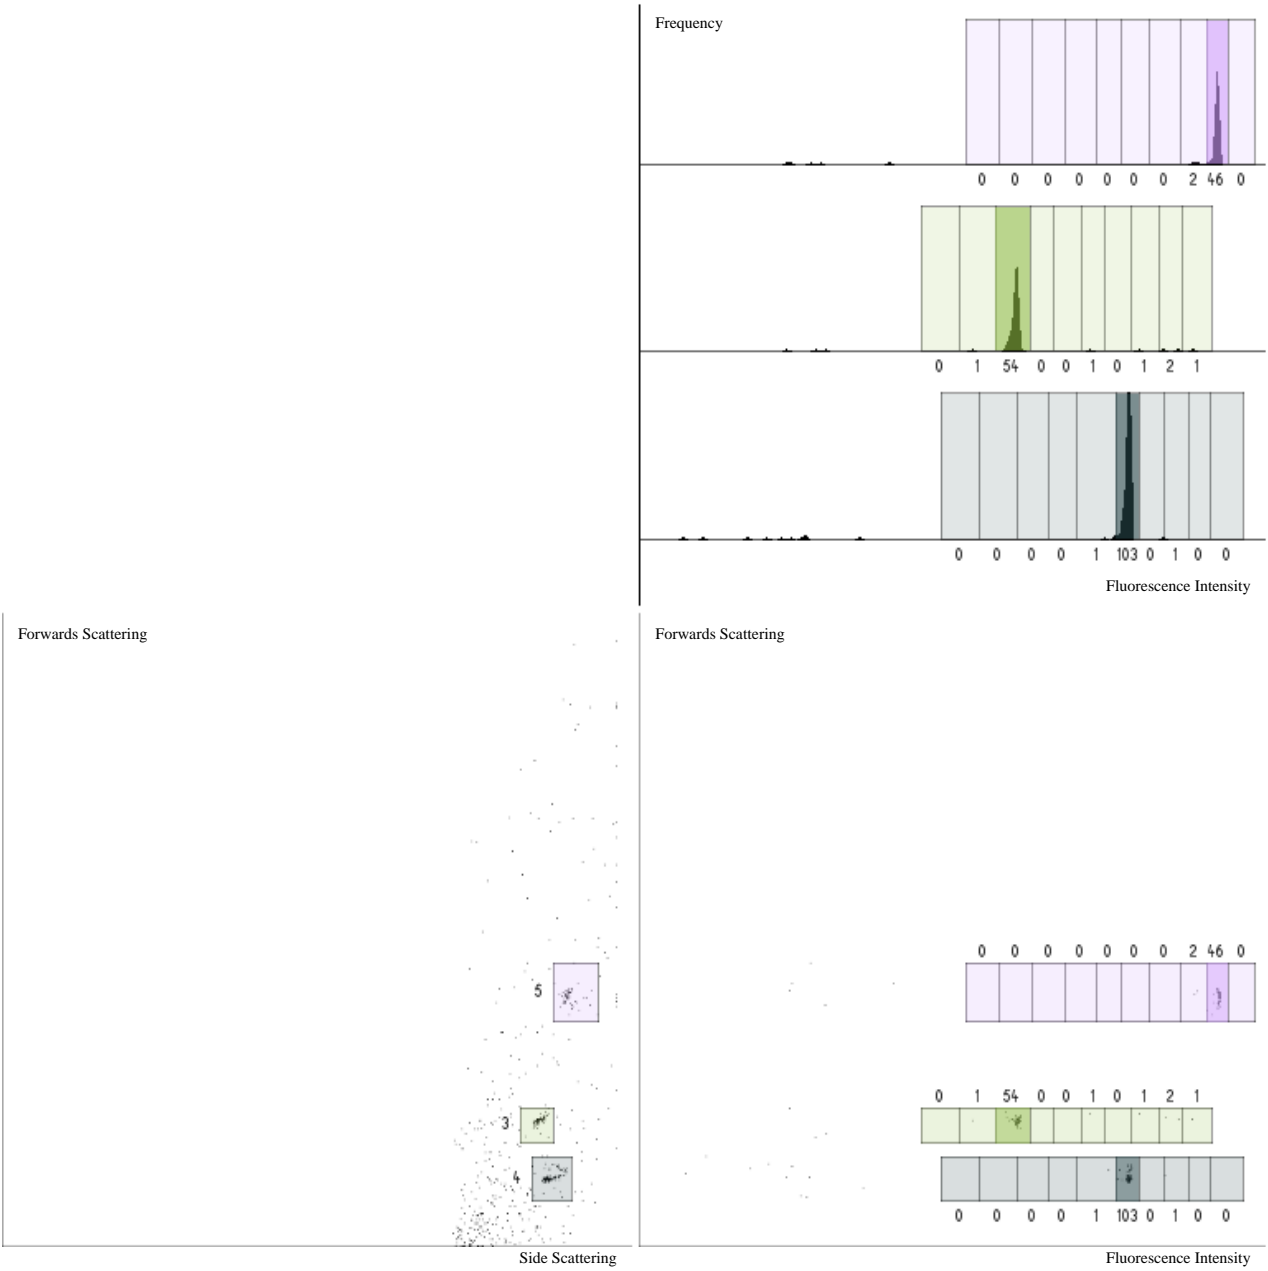

ANNEX 3: TAG DECONVOLUTION - BEAD 91

Passes flow sorting criteria: Yes  
Passes tag deconvolution criteria: Yes  
Included in protocol analysis: Yes  
Protocol: 4, 10, 4, 1  
Filename: Bin1\_plateA0\_G11.fcs  
Split 1: Petrol shading  
Split 2: Green shading  
Split 3: Violet shading

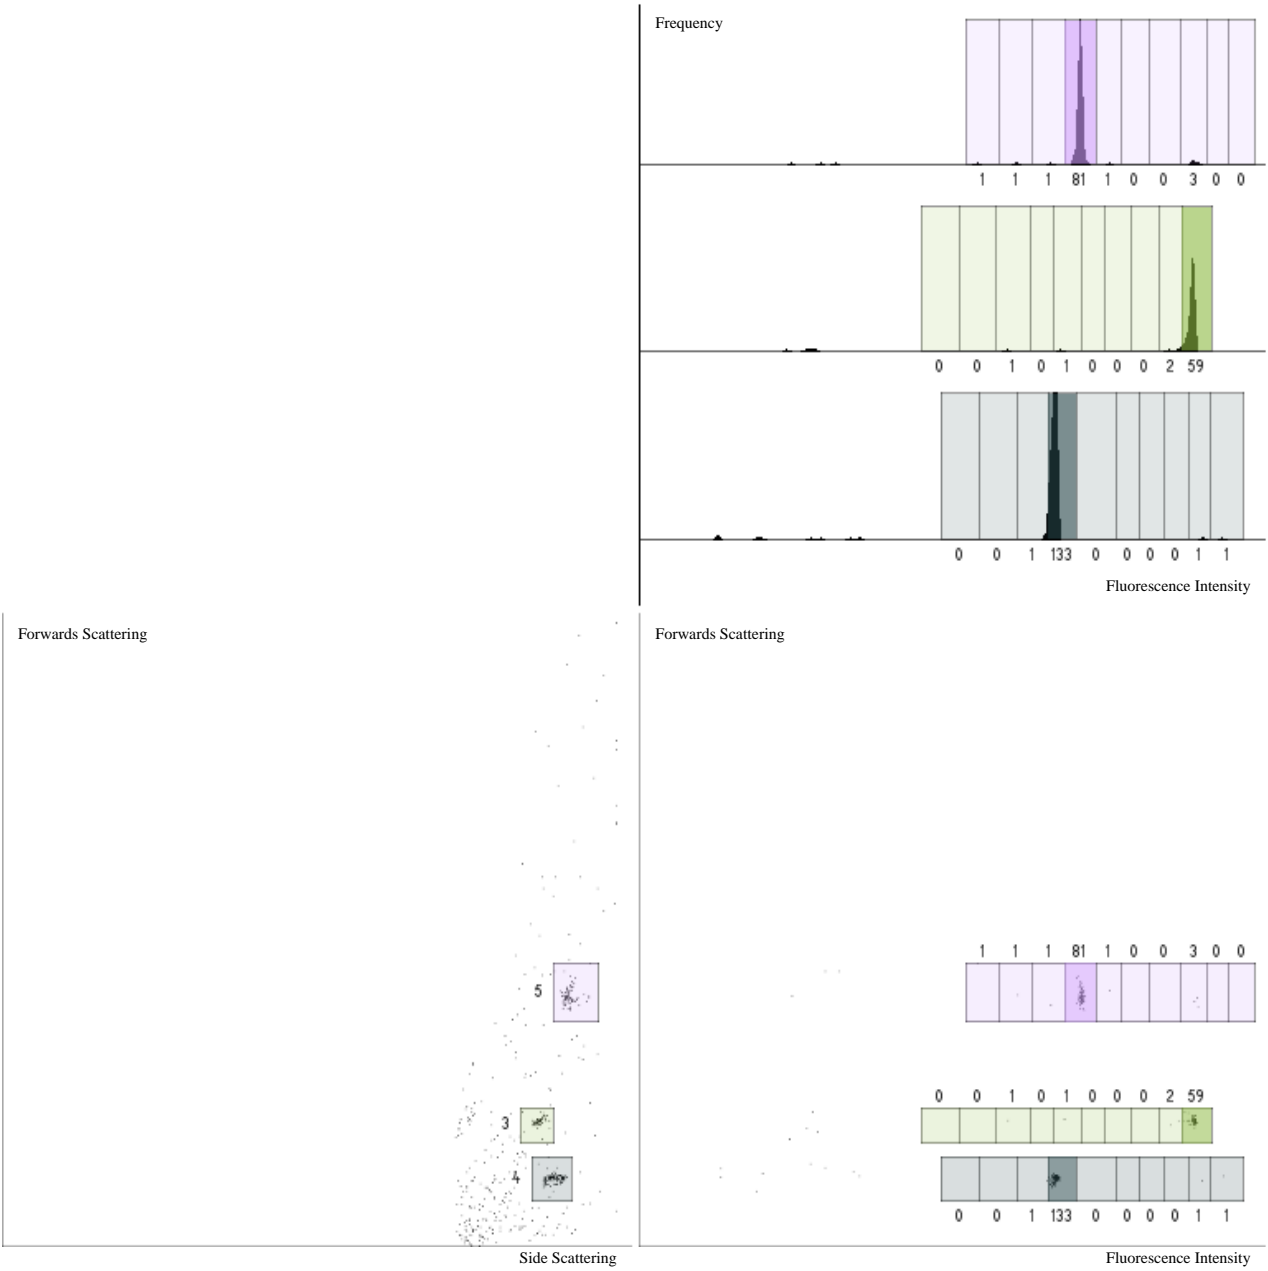

ANNEX 3: TAG DECONVOLUTION - BEAD 92

Passes flow sorting criteria: Yes  
Passes tag deconvolution criteria: No  
Included in protocol analysis: No  
Protocol: N/A  
Filename: Bin1\_plateA0\_G12.fcs  
Split 1: Petrol shading  
Split 2: Green shading  
Split 3: Violet shading

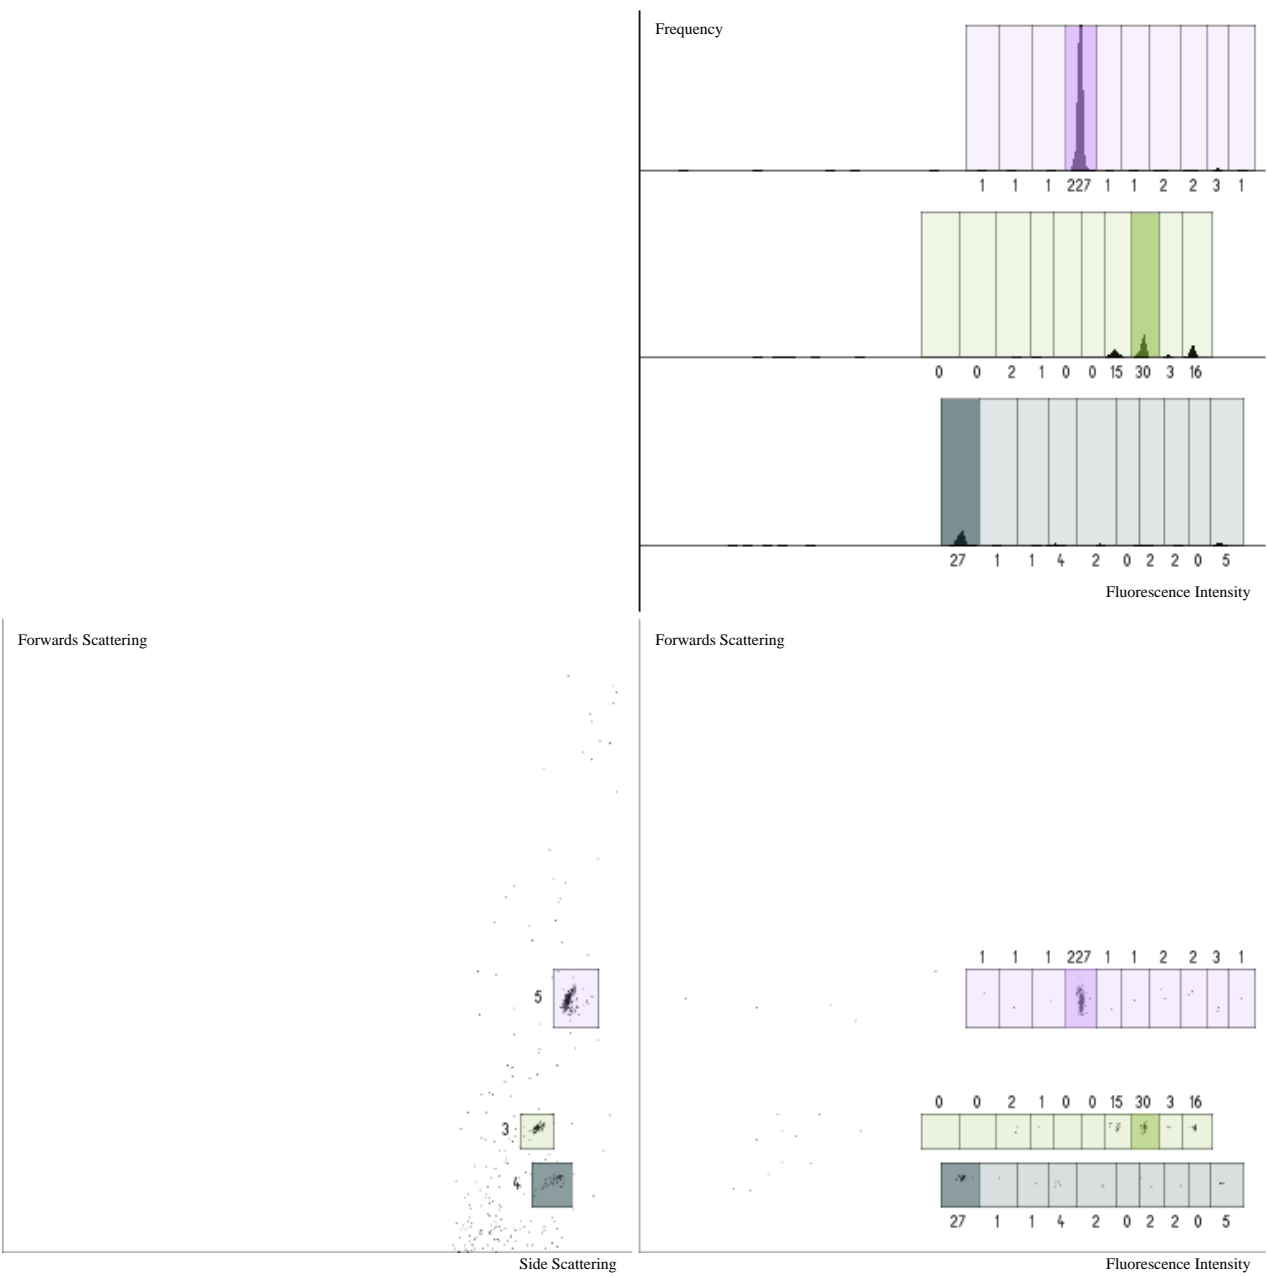

ANNEX 3: TAG DECONVOLUTION - BEAD 93

Passes flow sorting criteria: Yes  
Passes tag deconvolution criteria: Yes  
Included in protocol analysis: Yes  
Protocol: 9, 8, 8, 1  
Filename: Bin1\_plateA0\_H11.fcs  
Split 1: Petrol shading  
Split 2: Green shading  
Split 3: Violet shading

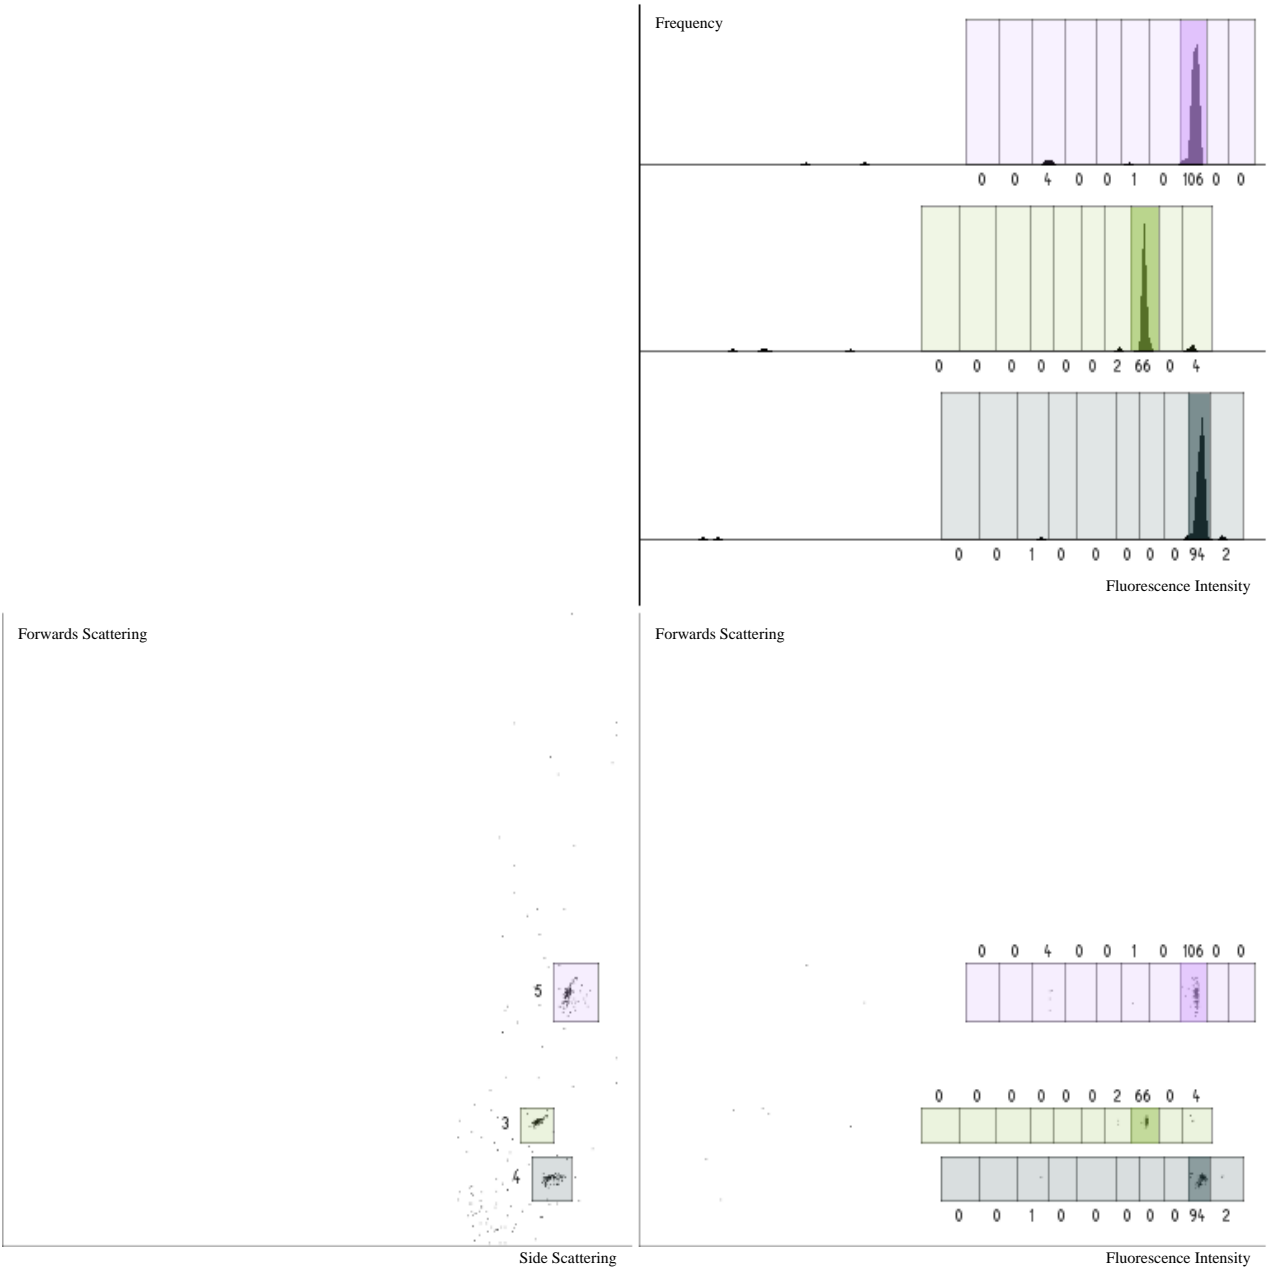

ANNEX 3: TAG DECONVOLUTION - BEAD 94

Passes flow sorting criteria: Yes  
Passes tag deconvolution criteria: No  
Included in protocol analysis: No  
Protocol: N/A  
Filename: Bin1\_plateB1\_H7.fcs  
Split 1: Petrol shading  
Split 2: Green shading  
Split 3: Violet shading

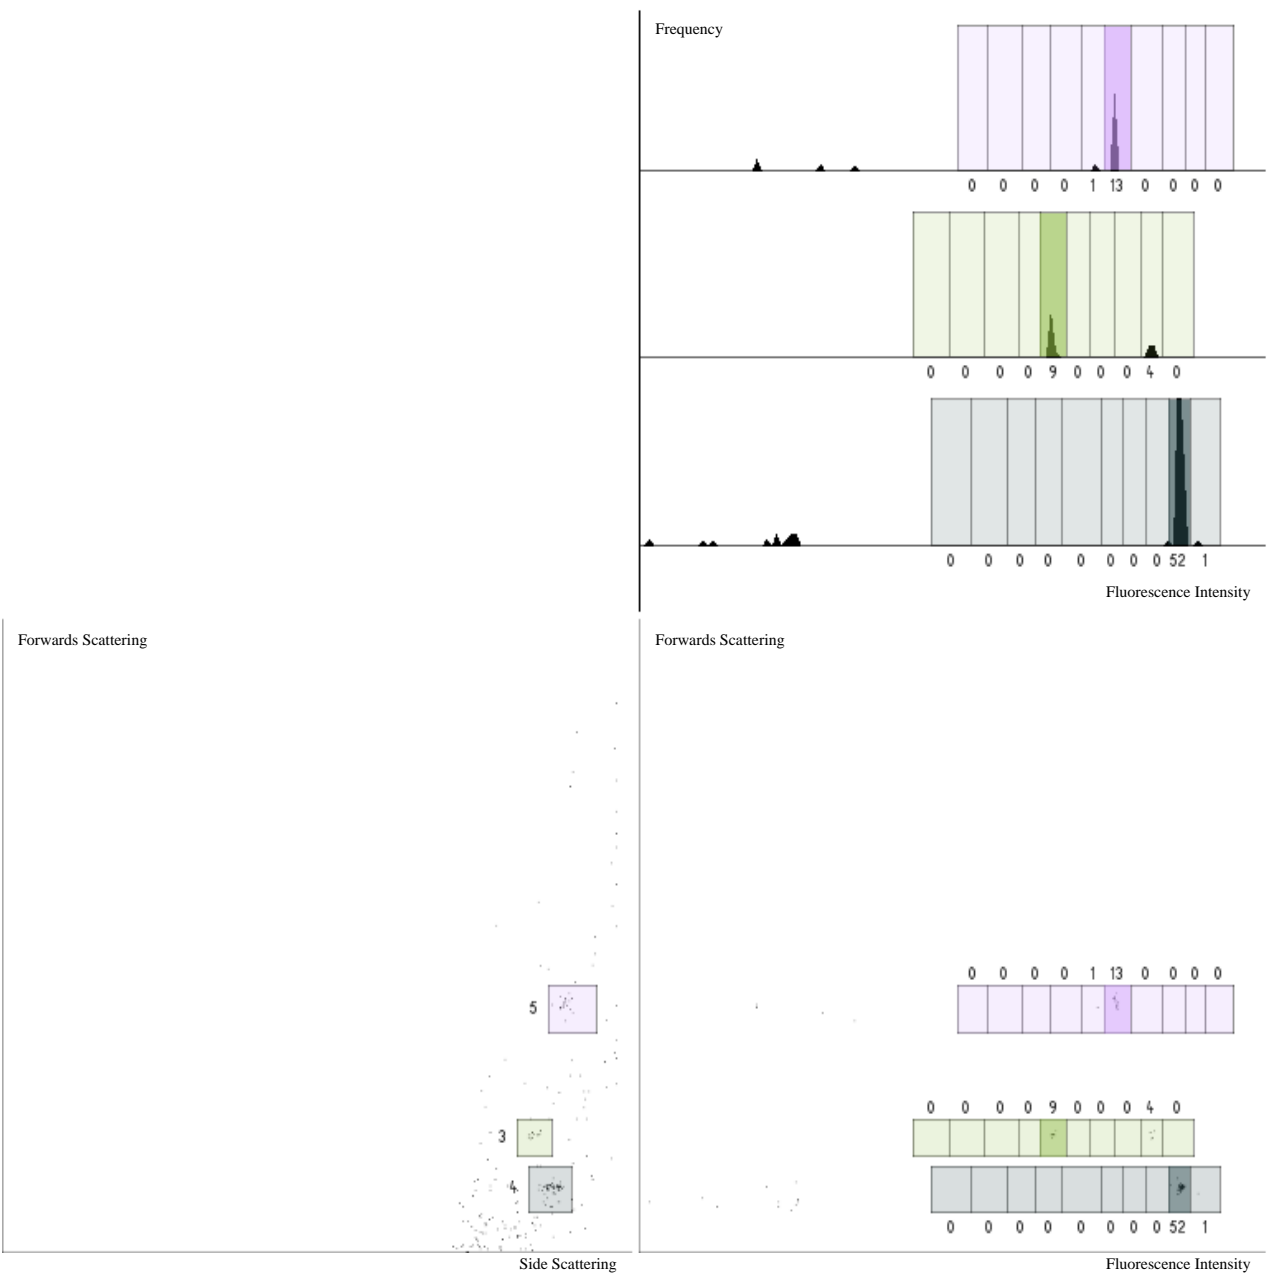



ANNEX 3: TAG DECONVOLUTION - BEAD 95

Passes flow sorting criteria: Yes  
Passes tag deconvolution criteria: Yes  
Included in protocol analysis: Yes  
Protocol: 9, 7, 3, 1  
Filename: Bin1\_plateB1\_A1.fcs  
Split 1: Petrol shading  
Split 2: Green shading  
Split 3: Violet shading

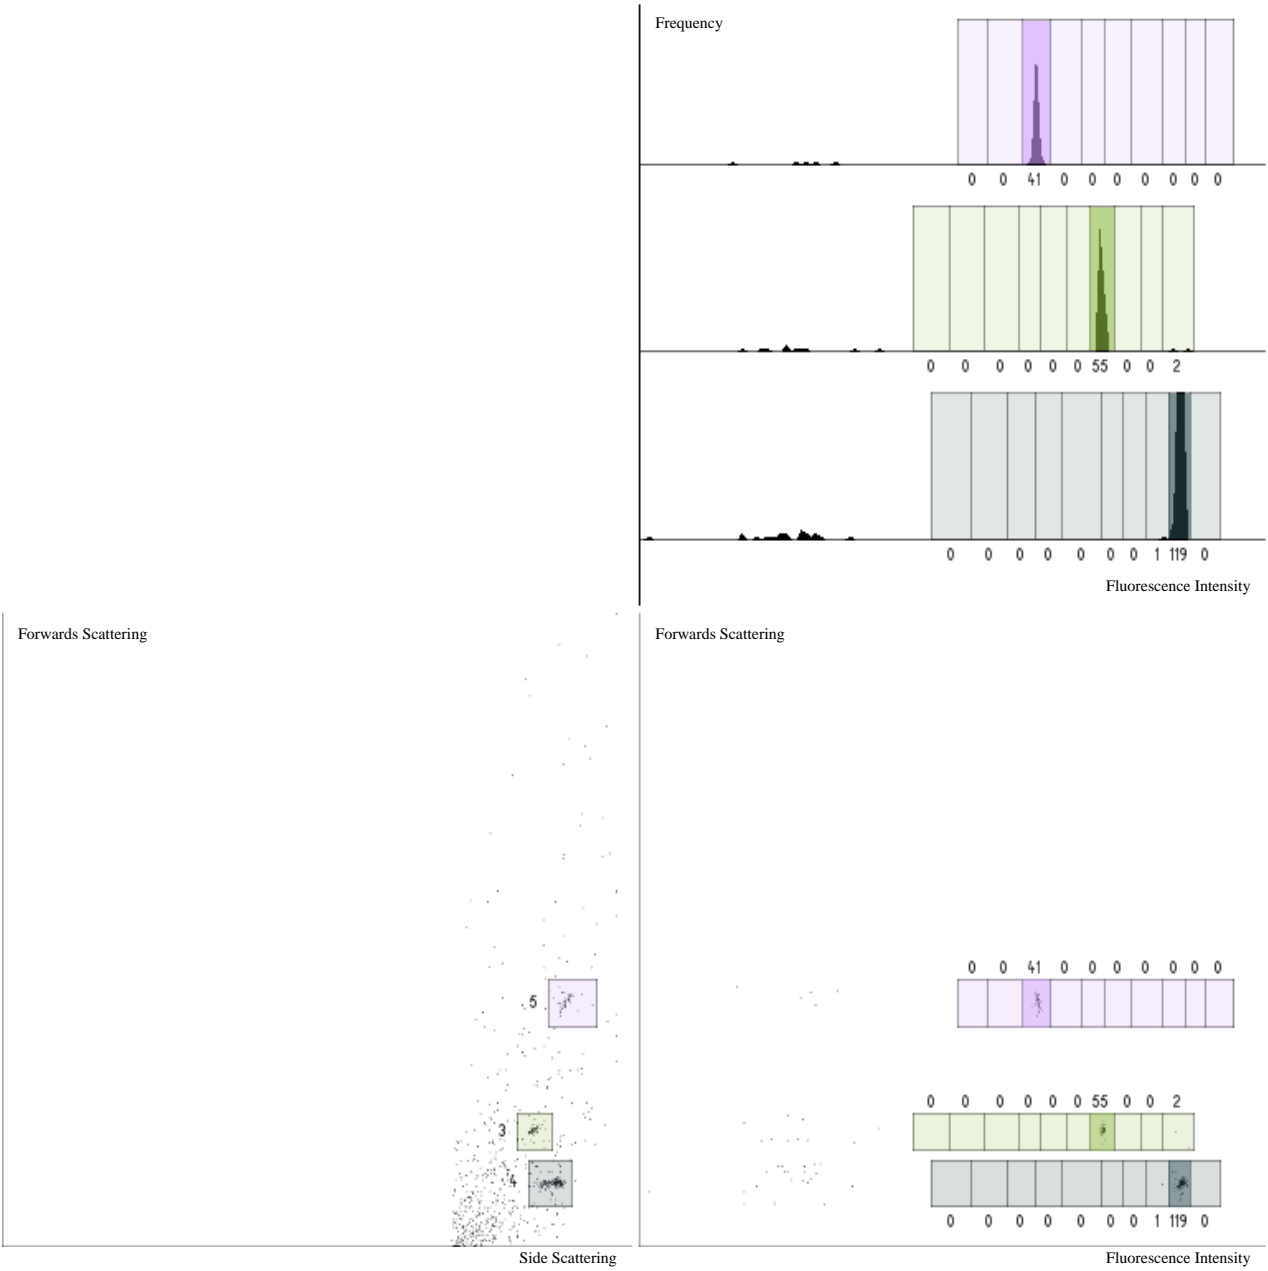

ANNEX 3: TAG DECONVOLUTION - BEAD 96

Passes flow sorting criteria: Yes  
Passes tag deconvolution criteria: Yes  
Included in protocol analysis: Yes  
Protocol: 10, 10, 7, 1  
Filename: Bin1\_plateB1\_A6.fcs  
Split 1: Petrol shading  
Split 2: Green shading  
Split 3: Violet shading

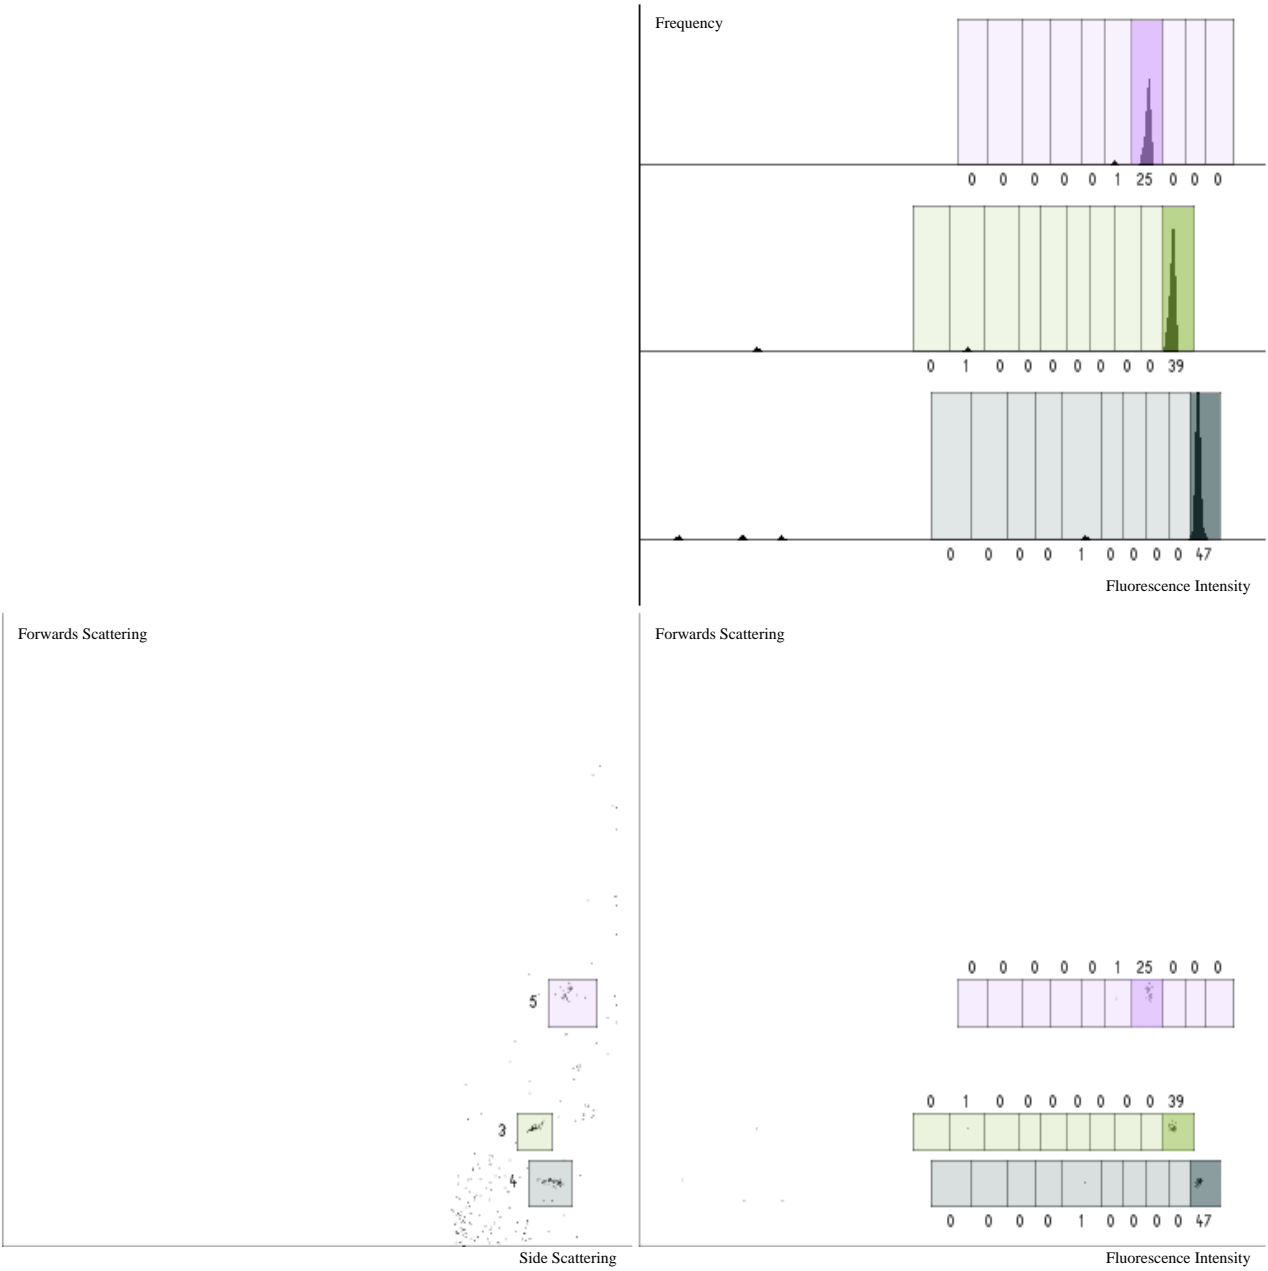

ANNEX 3: TAG DECONVOLUTION - BEAD 97

Passes flow sorting criteria: Yes  
Passes tag deconvolution criteria: Yes  
Included in protocol analysis: Yes  
Protocol: 10, 8, 1, 1  
Filename: Bin1\_plateB1\_A7.fcs  
Split 1: Petrol shading  
Split 2: Green shading  
Split 3: Violet shading

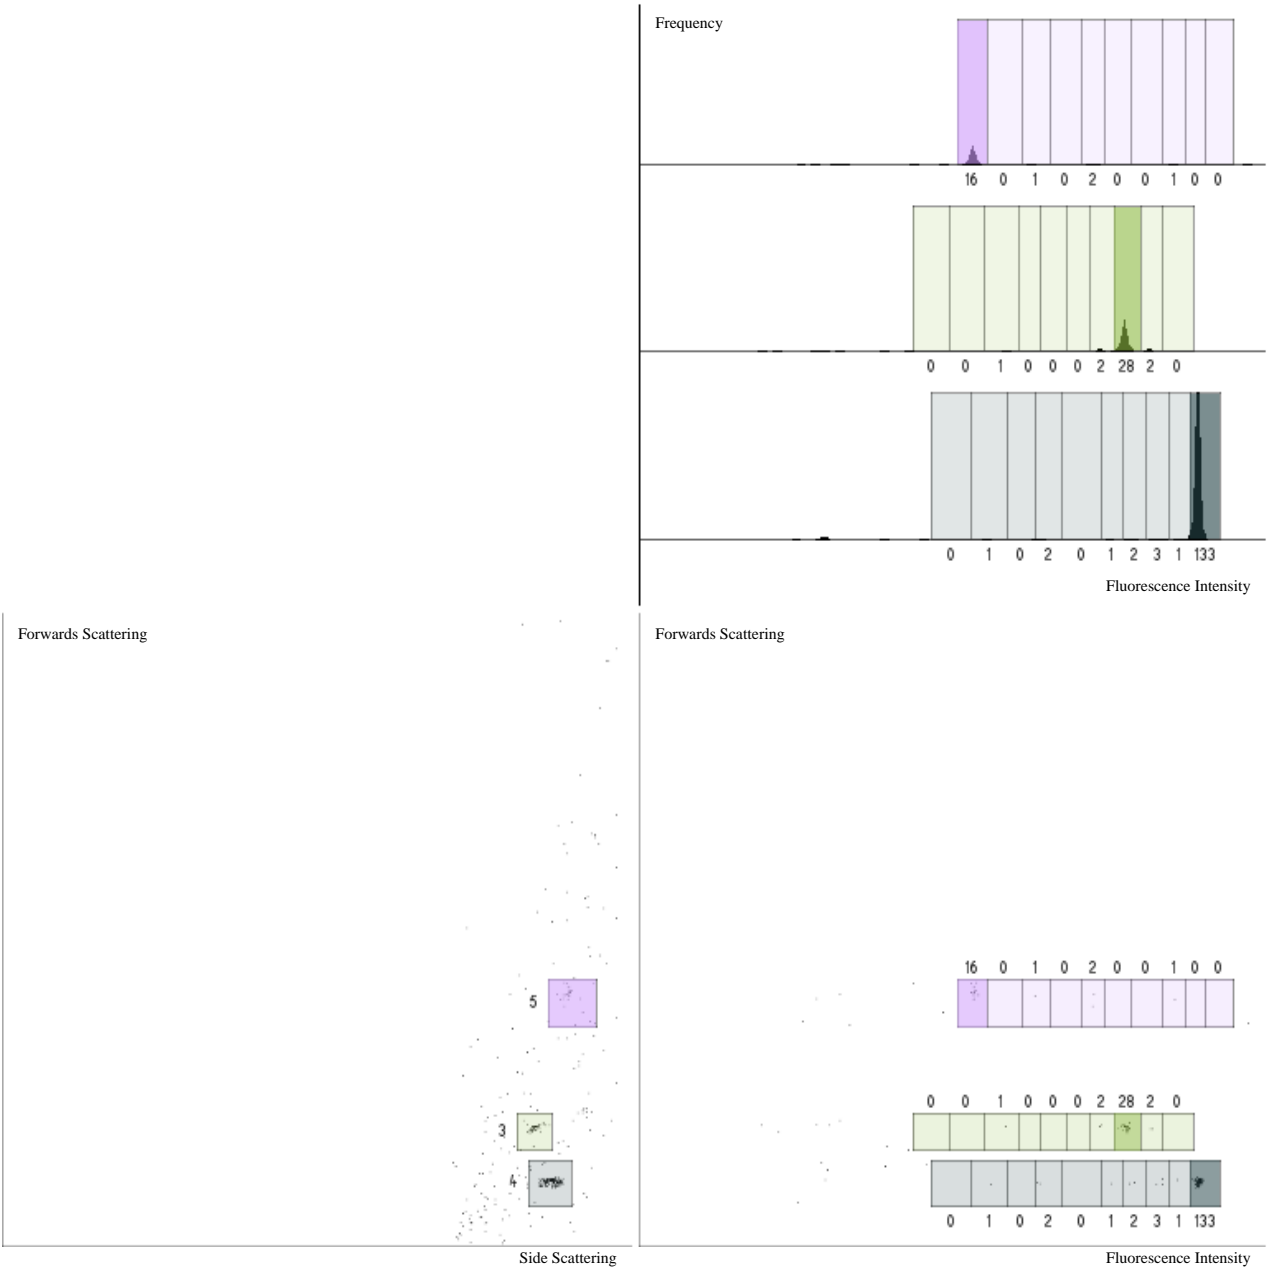

ANNEX 3: TAG DECONVOLUTION - BEAD 98

Passes flow sorting criteria: Yes  
Passes tag deconvolution criteria: Yes  
Included in protocol analysis: Yes  
Protocol: 10, 5, 8, 1  
Filename: Bin1\_plateB1\_B1.fcs  
Split 1: Petrol shading  
Split 2: Green shading  
Split 3: Violet shading

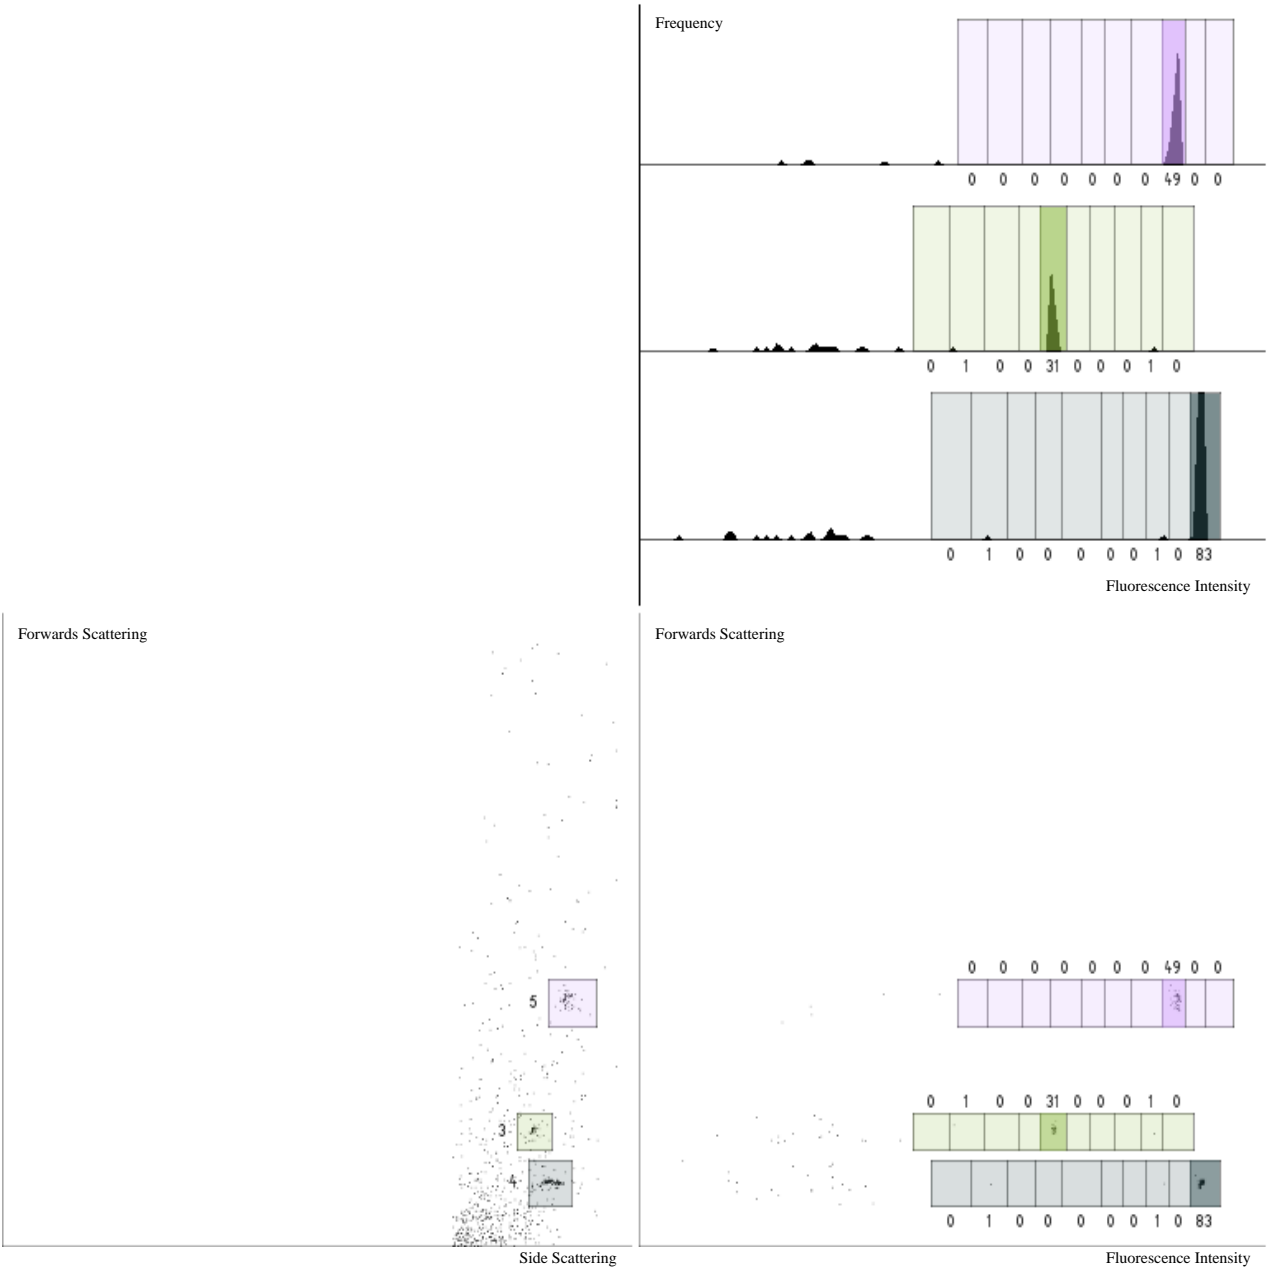

ANNEX 3: TAG DECONVOLUTION - BEAD 99

Passes flow sorting criteria: Yes  
Passes tag deconvolution criteria: No  
Included in protocol analysis: No  
Protocol: N/A  
Filename: Bin1\_plateB1\_B2.fcs  
Split 1: Petrol shading  
Split 2: Green shading  
Split 3: Violet shading

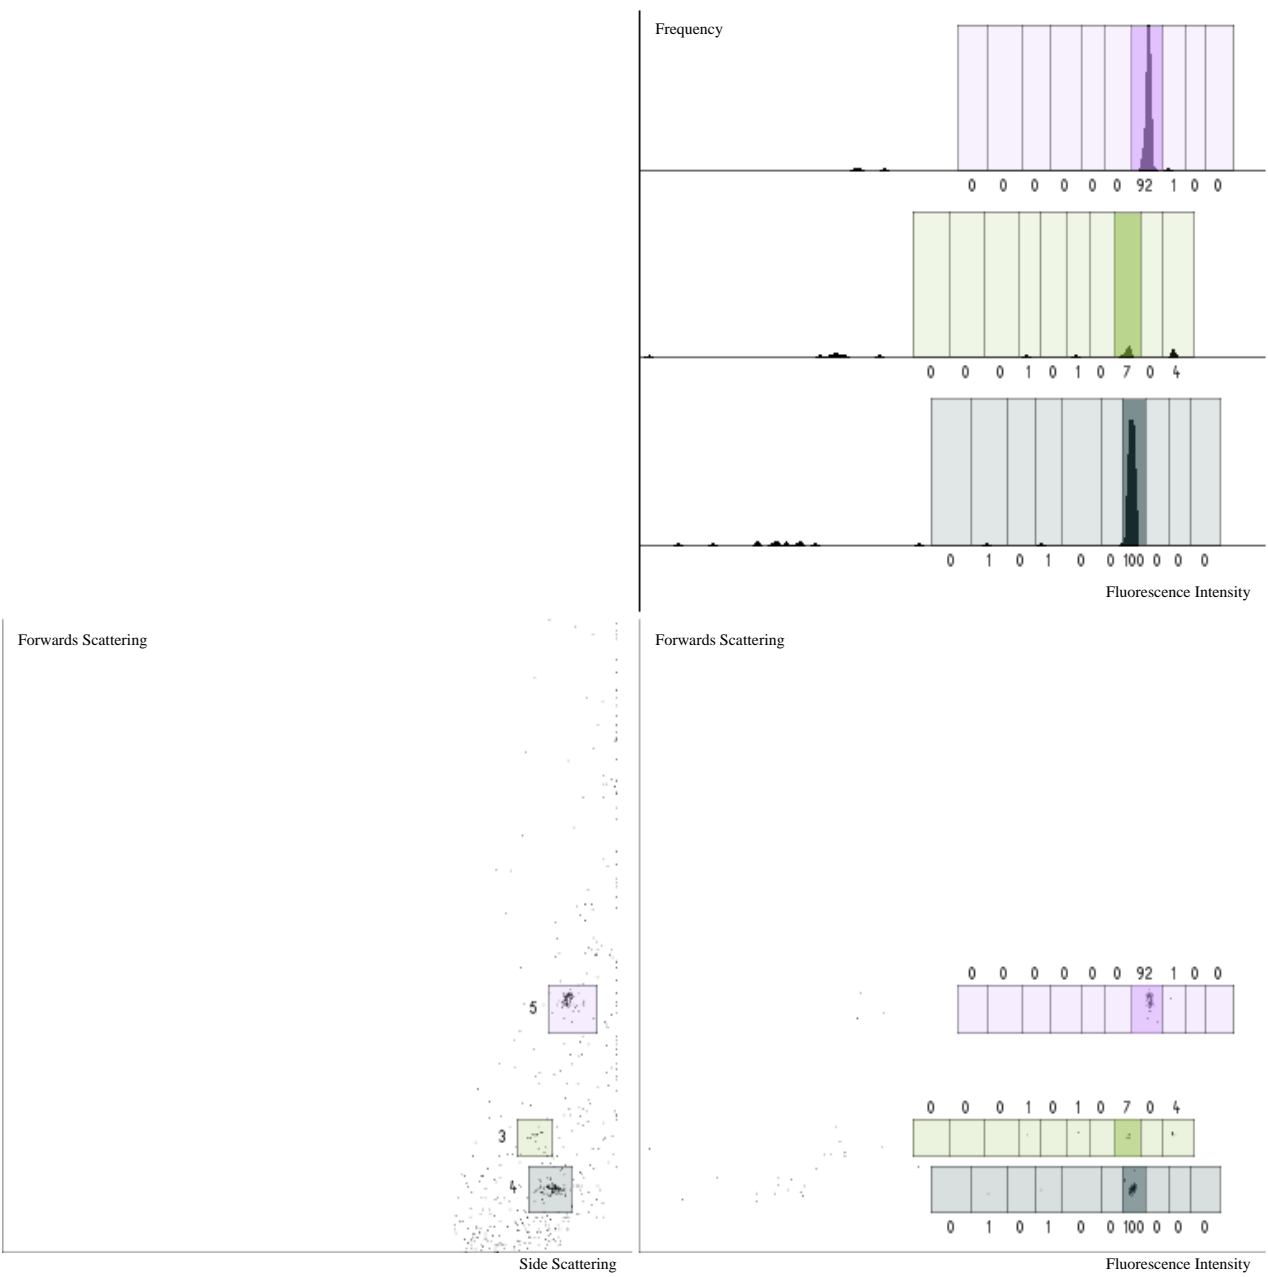

ANNEX 3: TAG DECONVOLUTION - BEAD 100

Passes flow sorting criteria: Yes  
Passes tag deconvolution criteria: No  
Included in protocol analysis: No  
Protocol: N/A  
Filename: Bin1\_plateB1\_B3.fcs  
Split 1: Petrol shading  
Split 2: Green shading  
Split 3: Violet shading

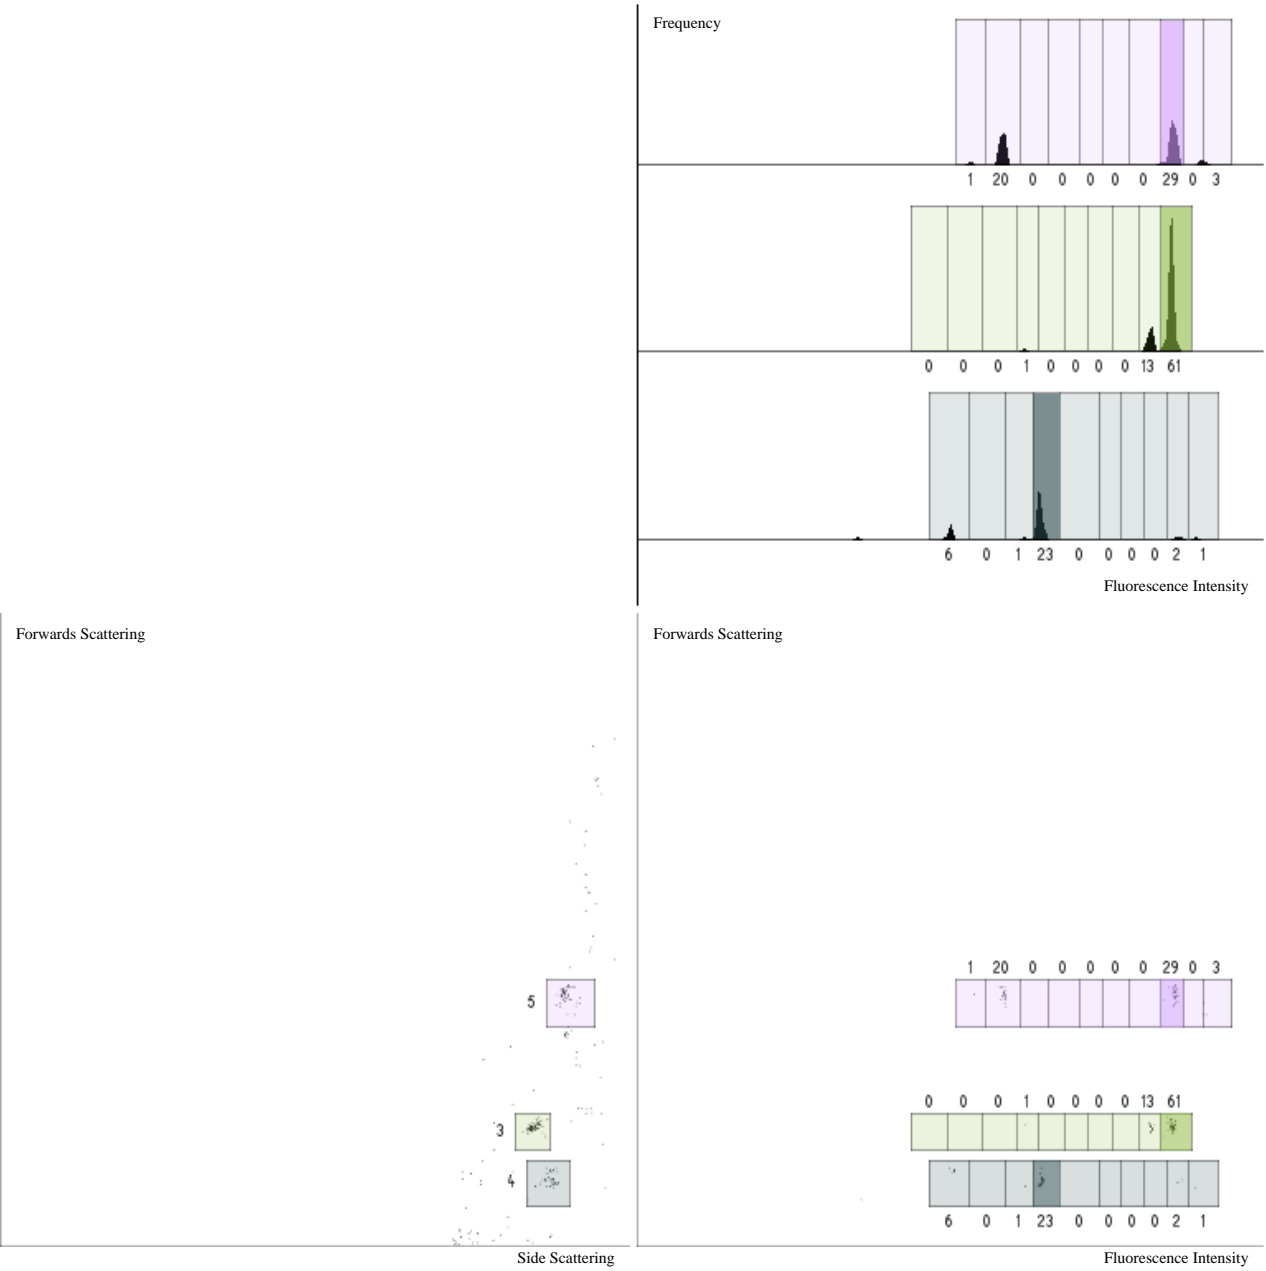

ANNEX 3: TAG DECONVOLUTION - BEAD 101

Passes flow sorting criteria: Yes  
Passes tag deconvolution criteria: Yes  
Included in protocol analysis: Yes  
Protocol: 1, 5, 9, 1  
Filename: Bin1\_plateB1\_B4.fcs  
Split 1: Petrol shading  
Split 2: Green shading  
Split 3: Violet shading

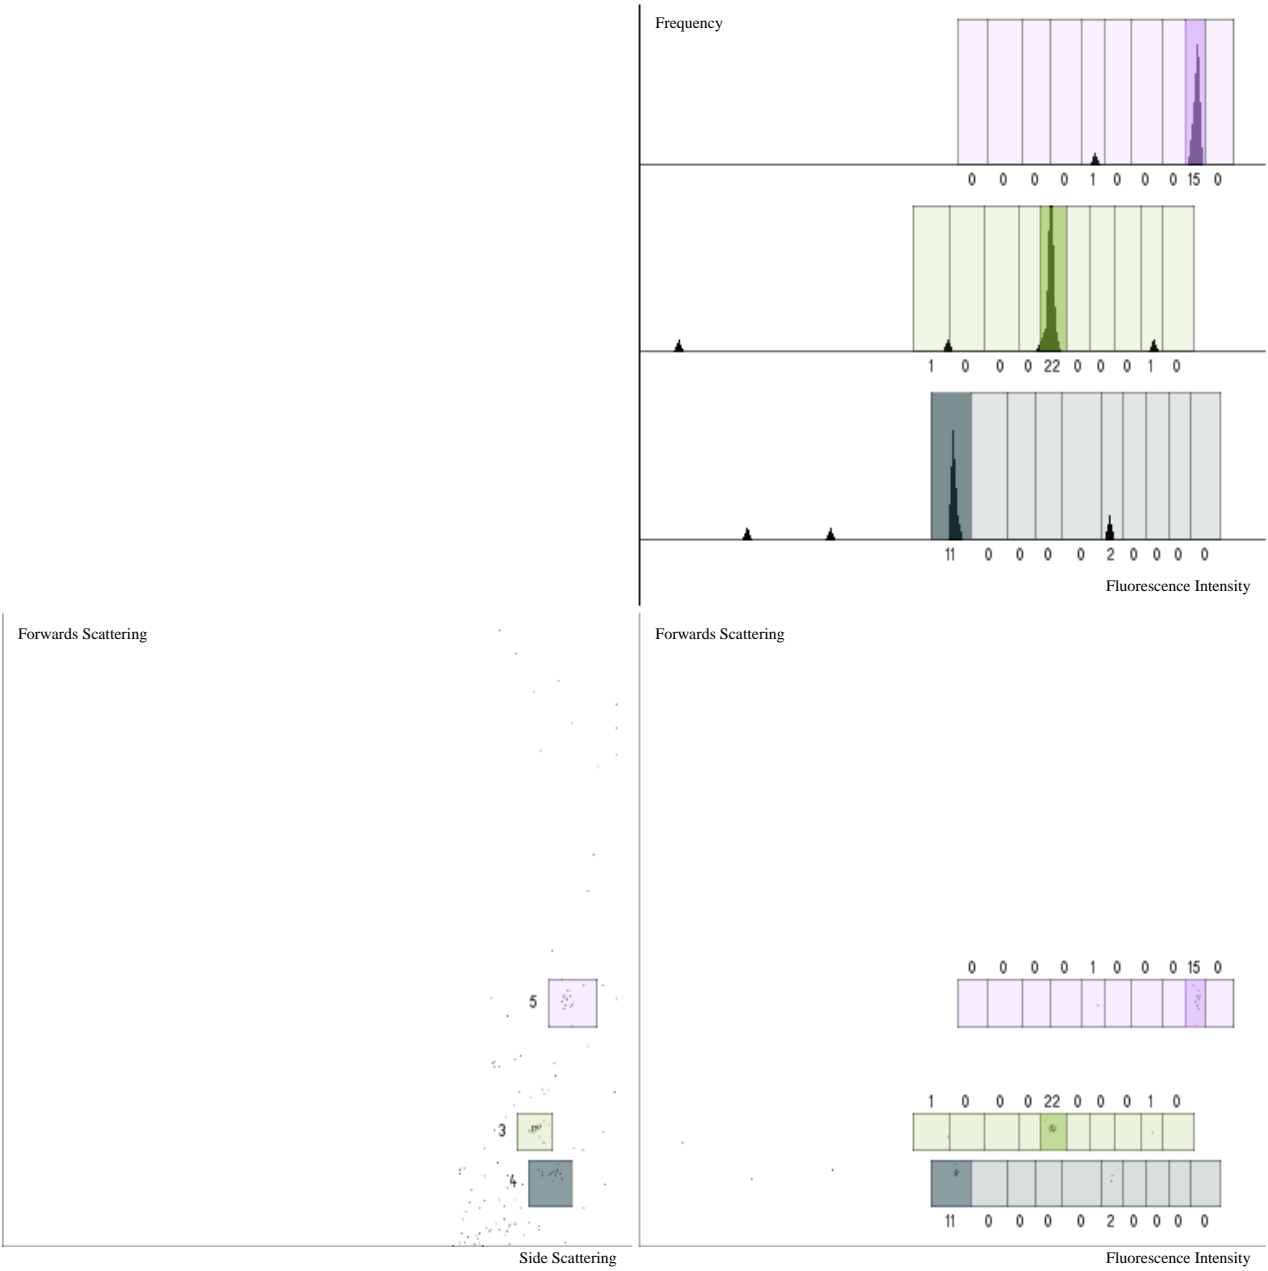

ANNEX 3: TAG DECONVOLUTION - BEAD 102

Passes flow sorting criteria: Yes  
Passes tag deconvolution criteria: No  
Included in protocol analysis: No  
Protocol: N/A  
Filename: Bin1\_plateB1\_C1.fcs  
Split 1: Petrol shading  
Split 2: Green shading  
Split 3: Violet shading

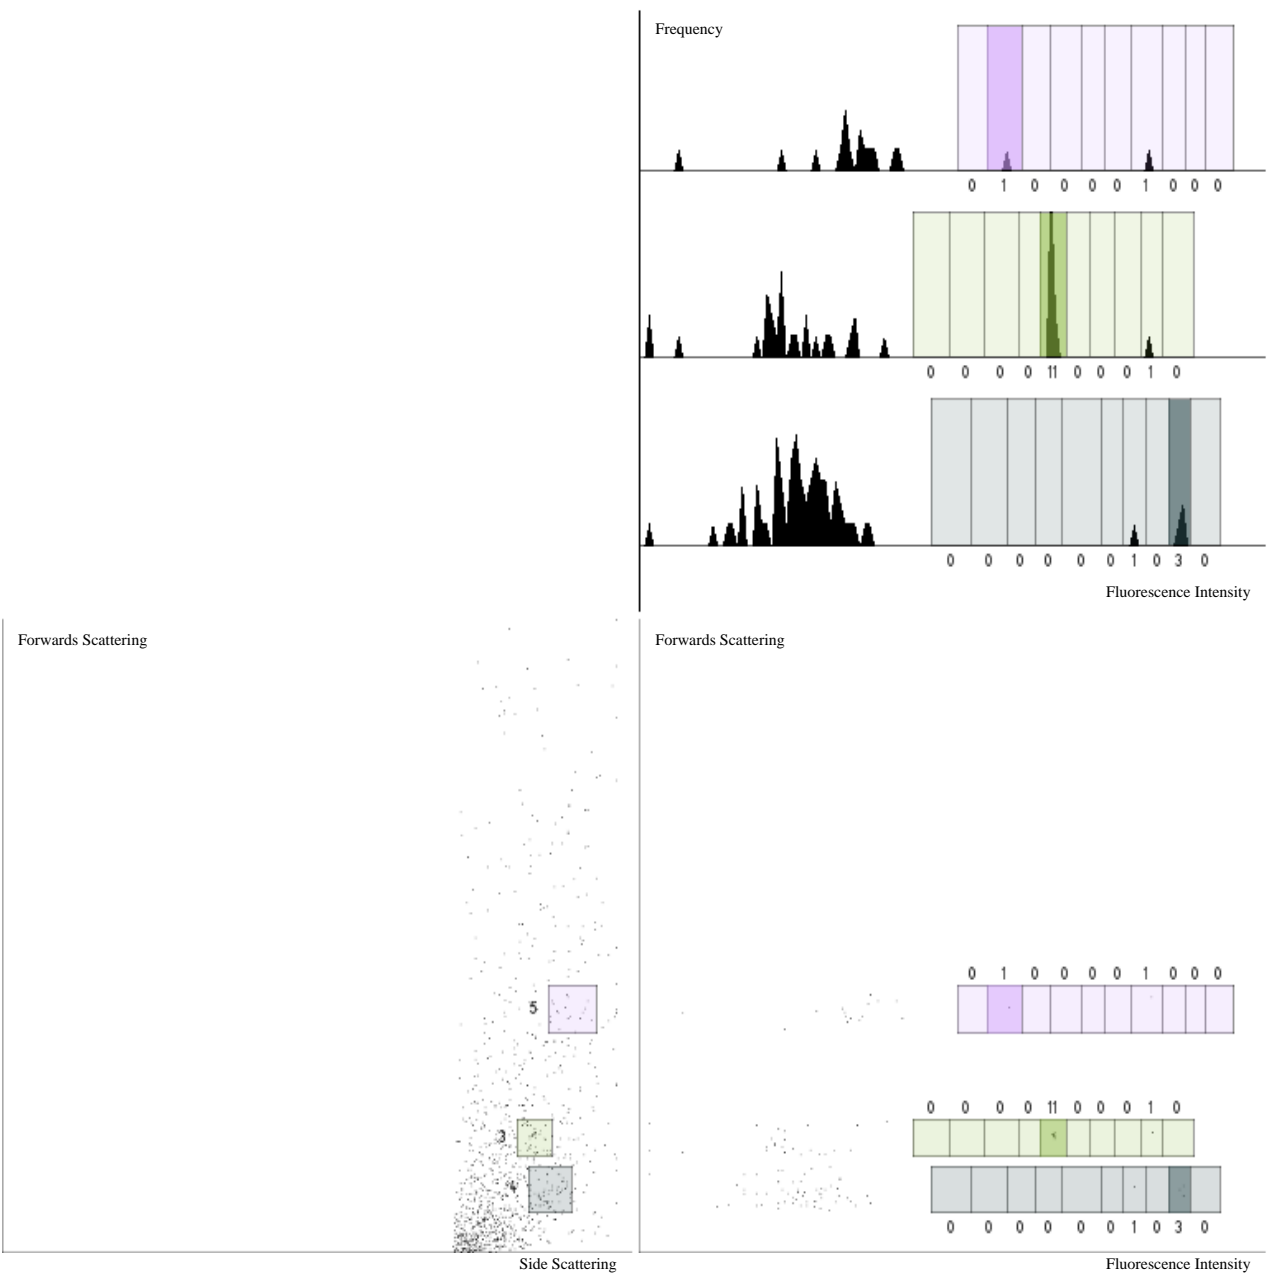



ANNEX 3: TAG DECONVOLUTION - BEAD 103

Passes flow sorting criteria: Yes  
Passes tag deconvolution criteria: No  
Included in protocol analysis: No  
Protocol: N/A  
Filename: Bin1\_plateB1\_C2.fcs  
Split 1: Petrol shading  
Split 2: Green shading  
Split 3: Violet shading

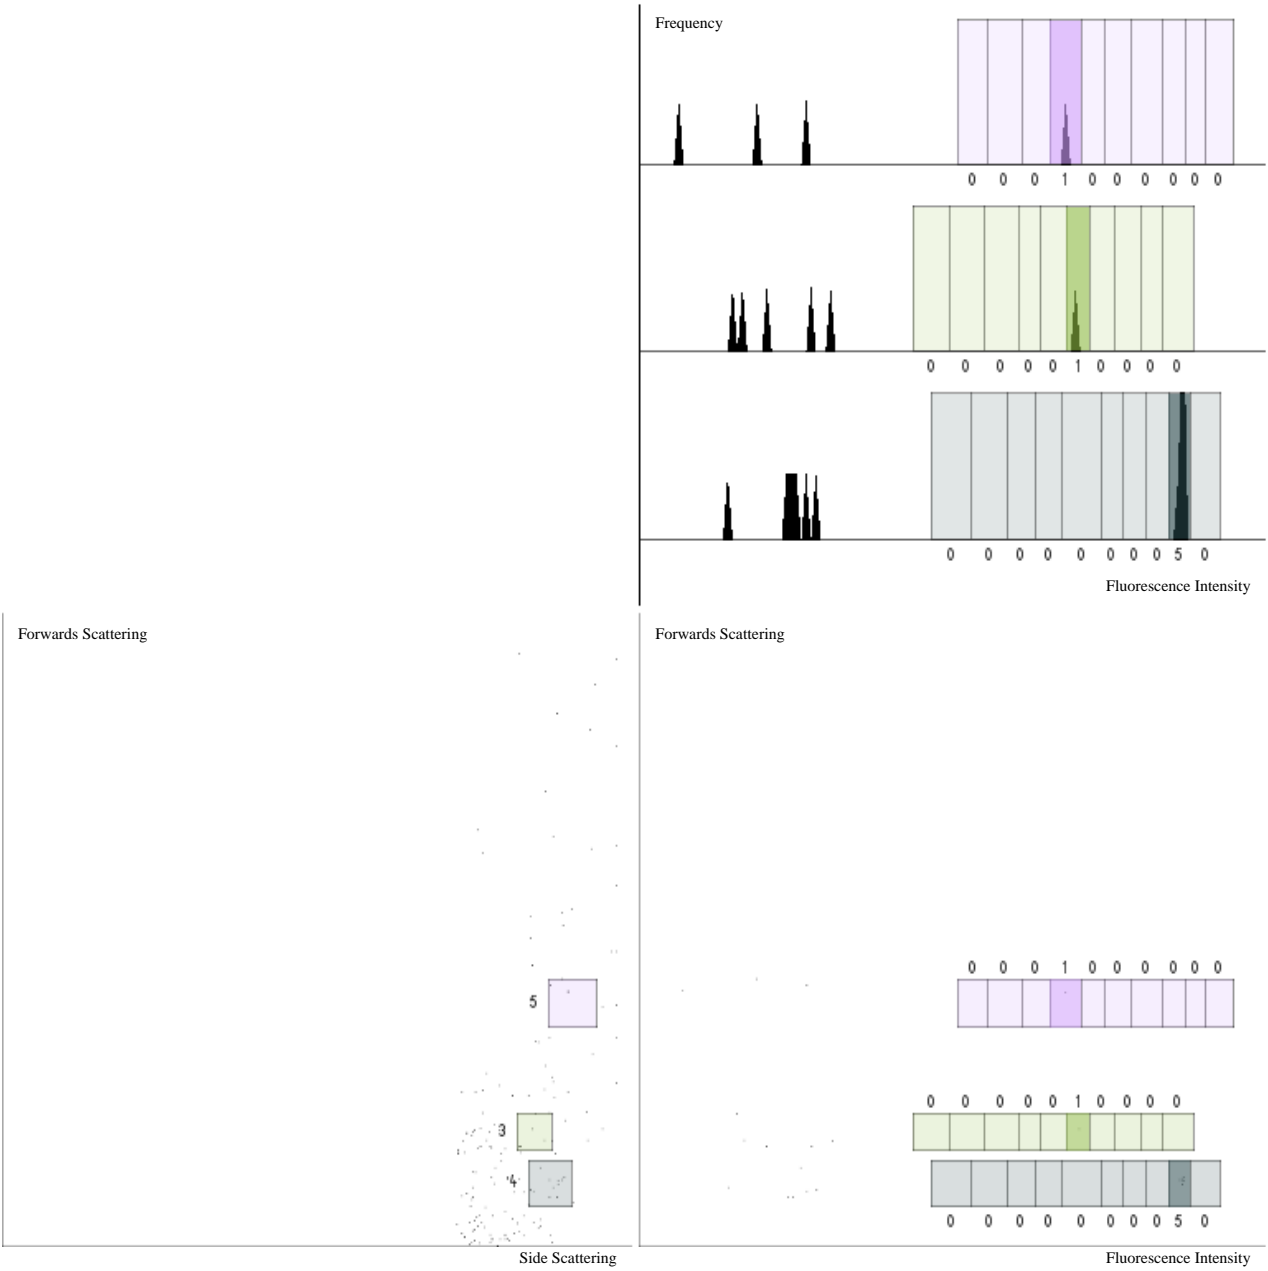

ANNEX 3: TAG DECONVOLUTION - BEAD 104

Passes flow sorting criteria: Yes  
Passes tag deconvolution criteria: No  
Included in protocol analysis: No  
Protocol: N/A  
Filename: Bin1\_plateB1\_C4.fcs  
Split 1: Petrol shading  
Split 2: Green shading  
Split 3: Violet shading

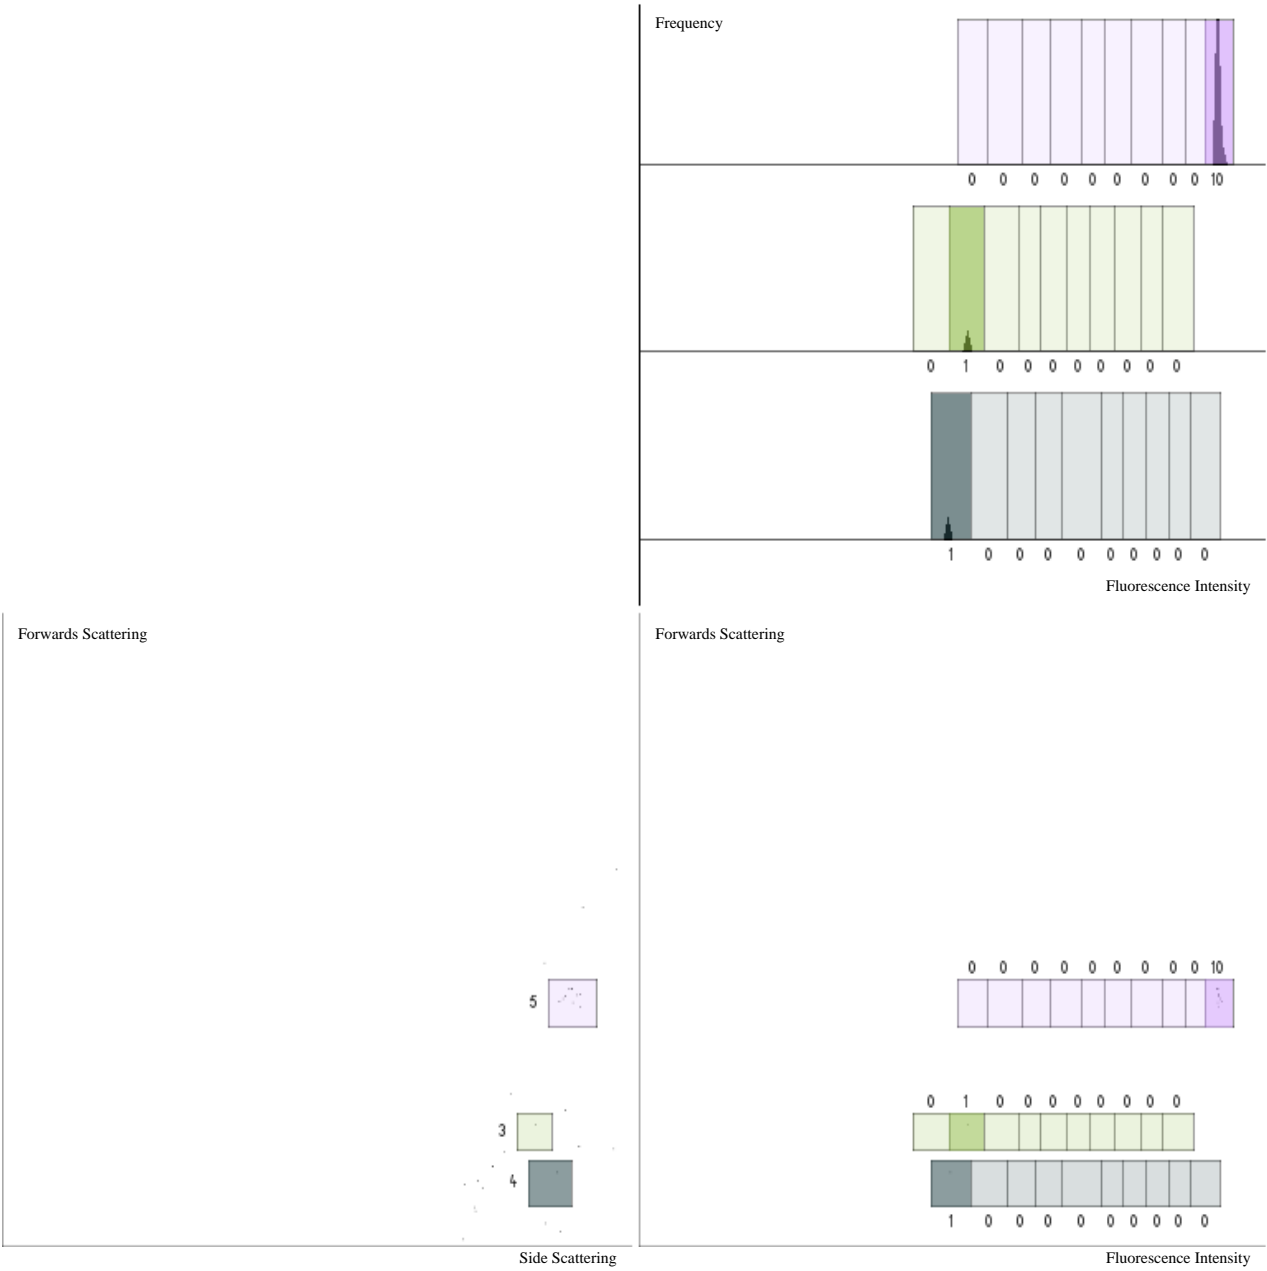

ANNEX 3: TAG DECONVOLUTION - BEAD 105

Passes flow sorting criteria: Yes  
Passes tag deconvolution criteria: No  
Included in protocol analysis: No  
Protocol: N/A  
Filename: Bin1\_plateB1\_C5.fcs  
Split 1: Petrol shading  
Split 2: Green shading  
Split 3: Violet shading

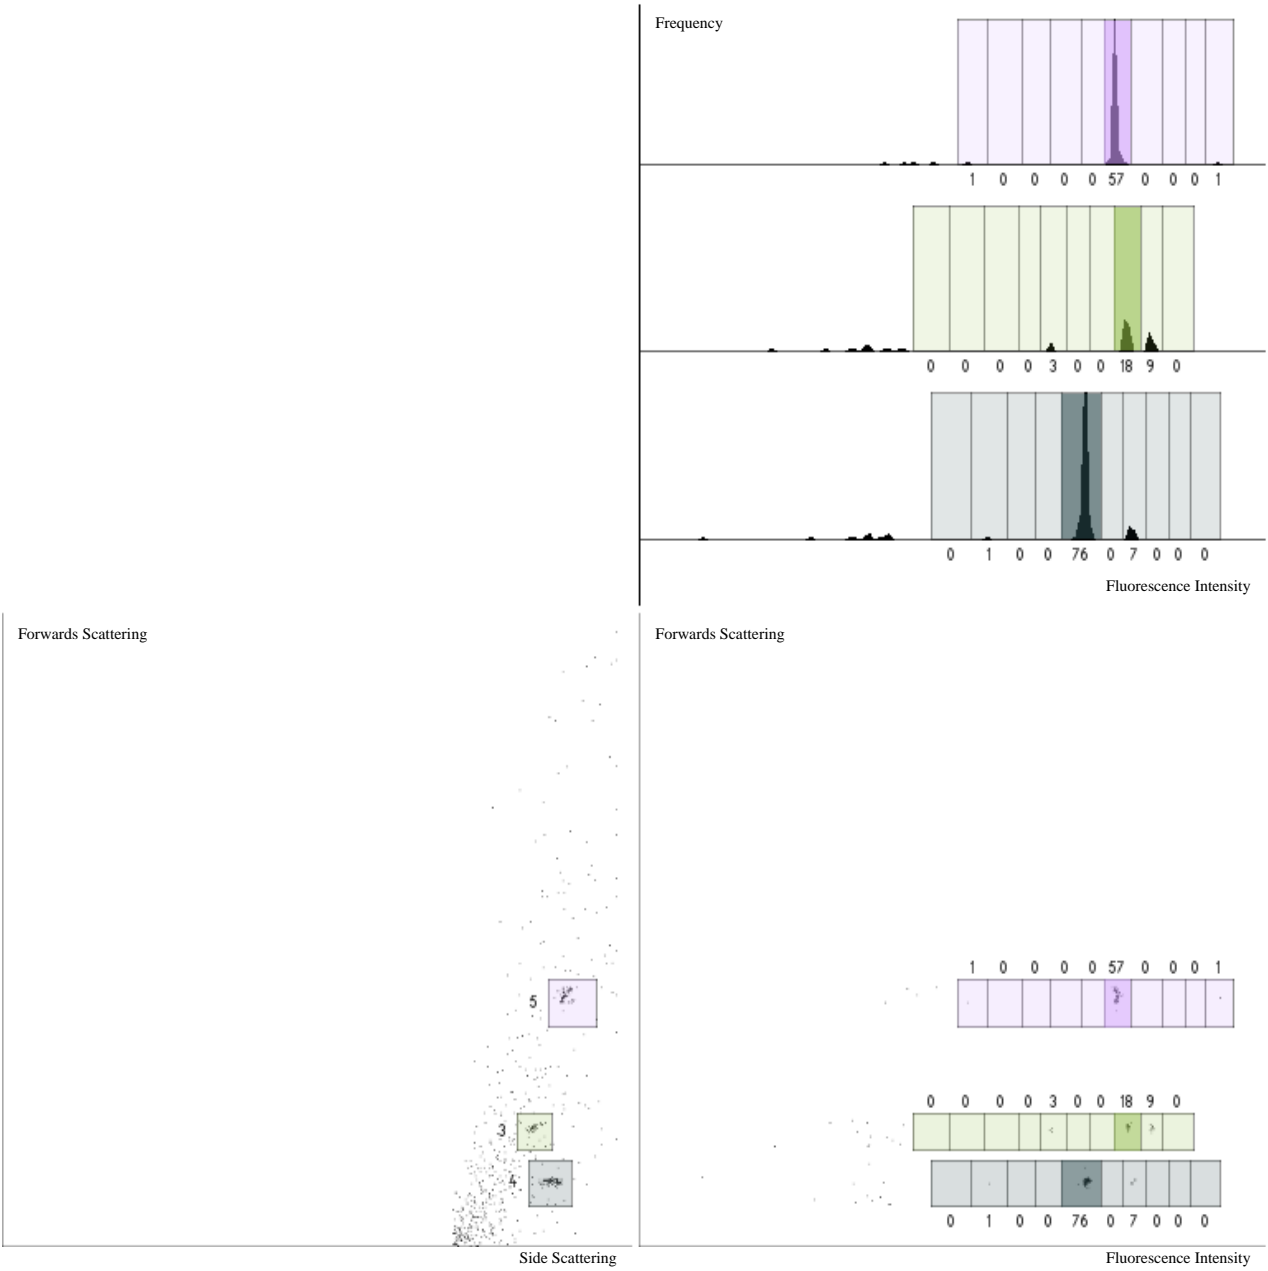

ANNEX 3: TAG DECONVOLUTION - BEAD 106

Passes flow sorting criteria: Yes  
Passes tag deconvolution criteria: Yes  
Included in protocol analysis: Yes  
Protocol: 9, 5, 7, 1  
Filename: Bin1\_plateB1\_C6.fcs  
Split 1: Petrol shading  
Split 2: Green shading  
Split 3: Violet shading

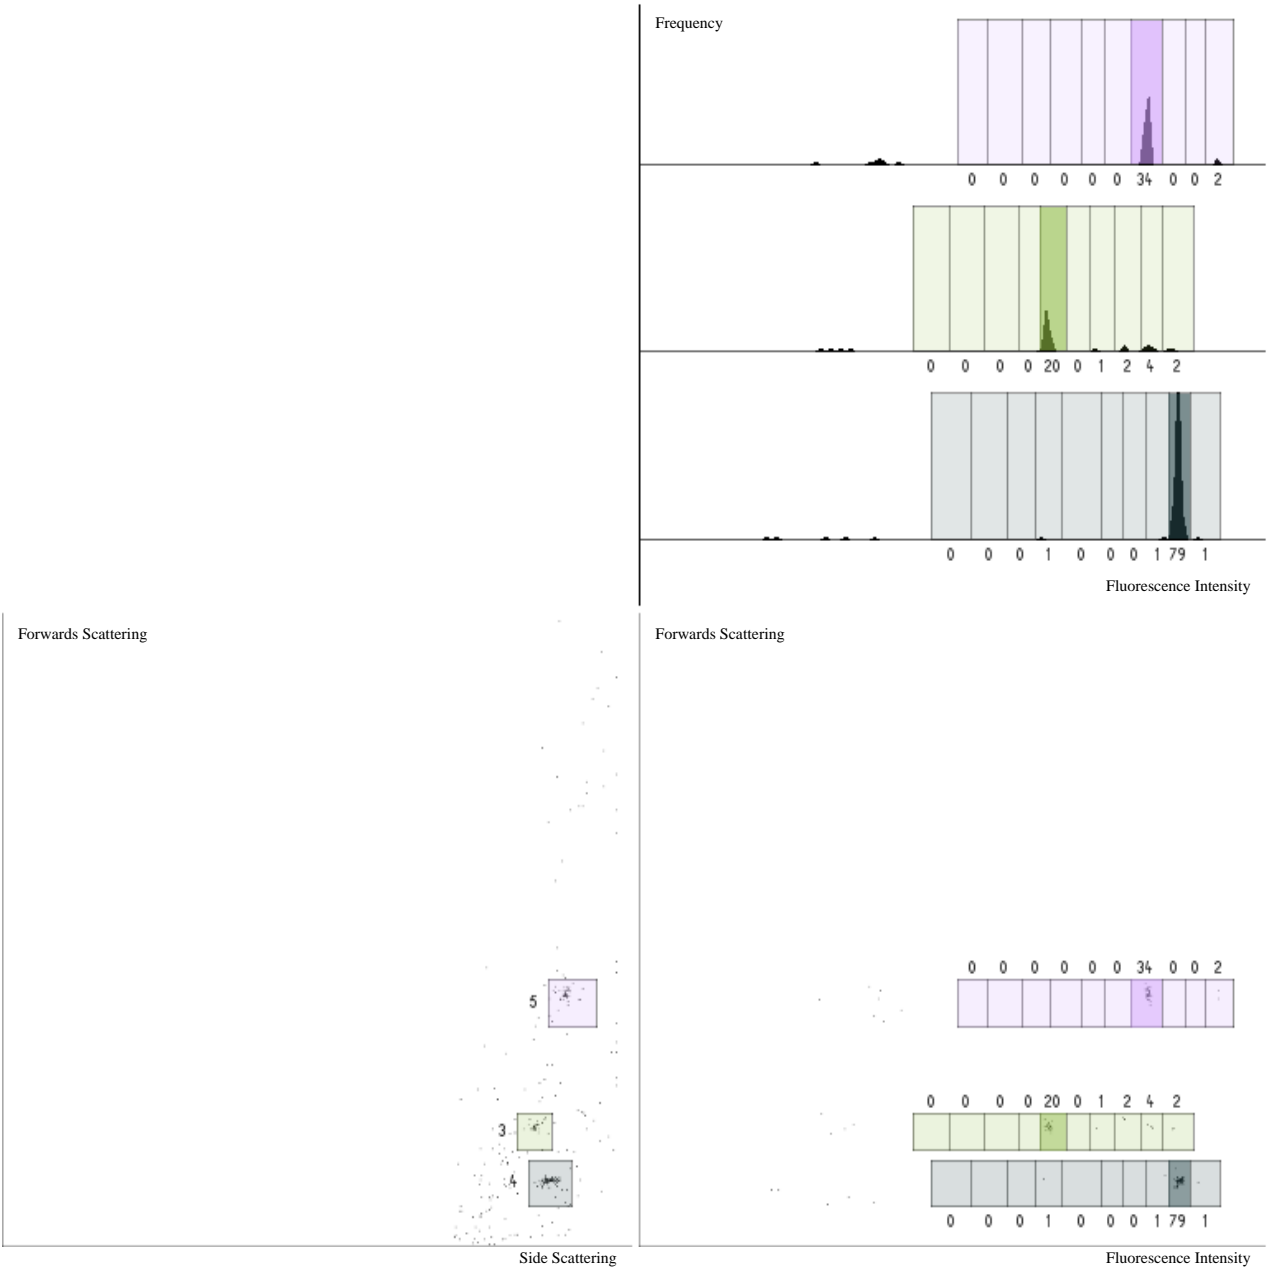

ANNEX 3: TAG DECONVOLUTION - BEAD 107

Passes flow sorting criteria: Yes  
Passes tag deconvolution criteria: No  
Included in protocol analysis: No  
Protocol: N/A  
Filename: Bin1\_plateB1\_C7.fcs  
Split 1: Petrol shading  
Split 2: Green shading  
Split 3: Violet shading

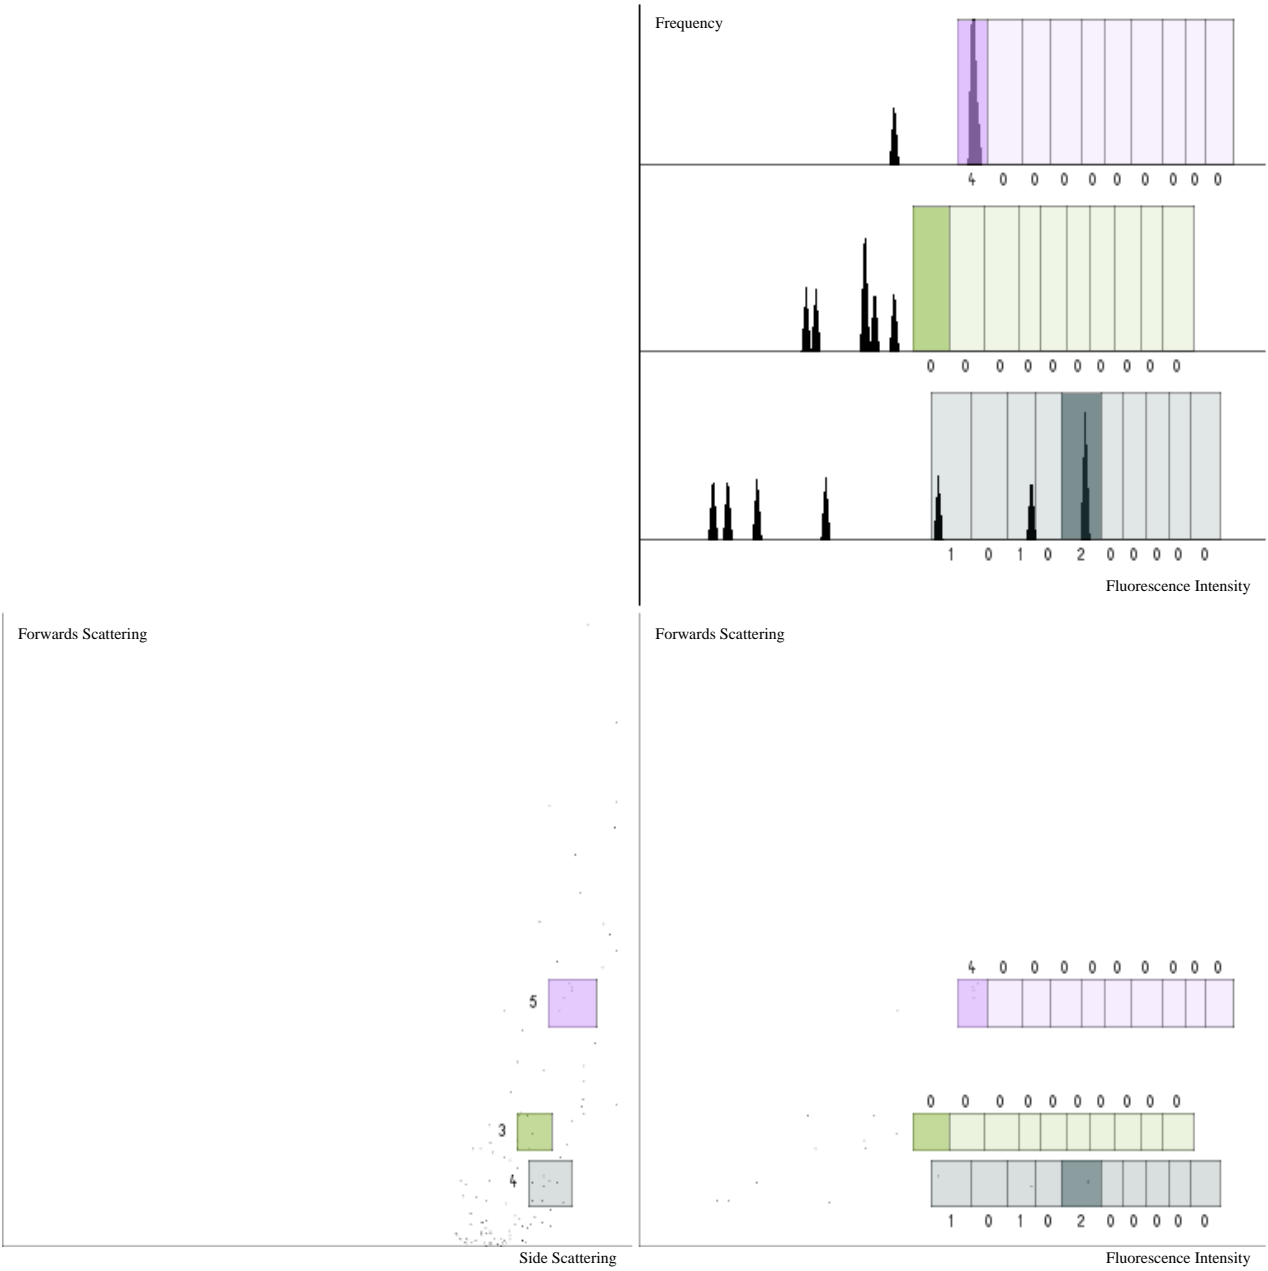

ANNEX 3: TAG DECONVOLUTION - BEAD 108

Passes flow sorting criteria: Yes  
Passes tag deconvolution criteria: Yes  
Included in protocol analysis: Yes  
Protocol: 9, 4, 6, 1  
Filename: Bin1\_plateB1\_D1.fcs  
Split 1: Petrol shading  
Split 2: Green shading  
Split 3: Violet shading

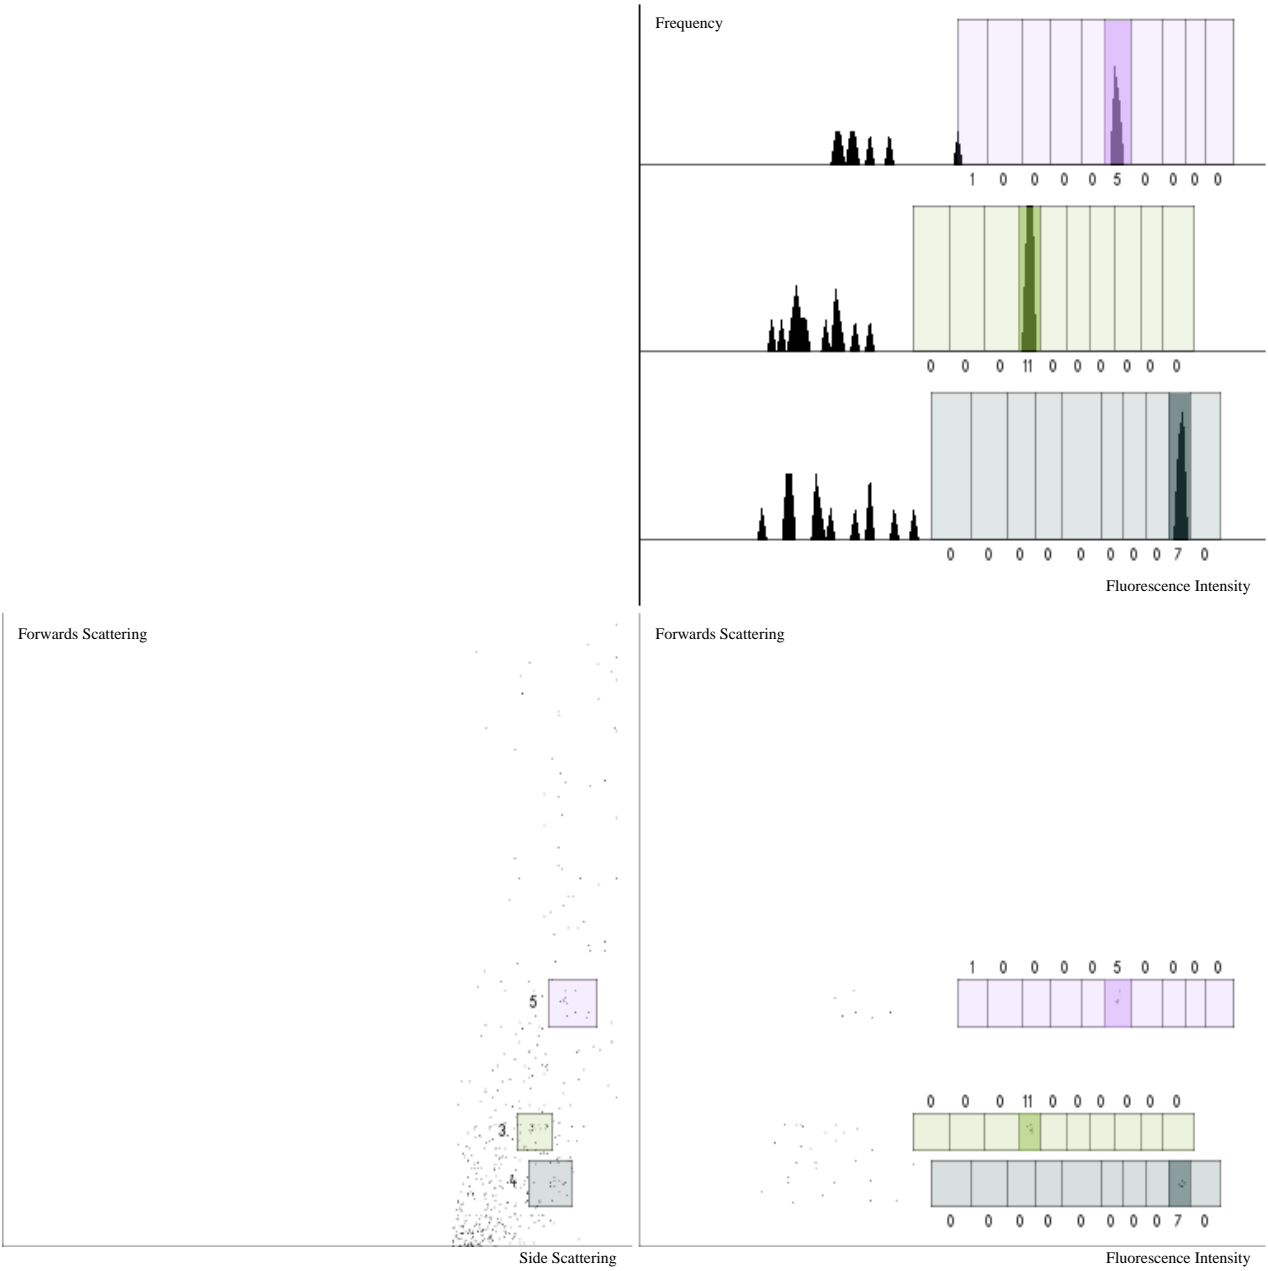

ANNEX 3: TAG DECONVOLUTION - BEAD 109

Passes flow sorting criteria: Yes  
Passes tag deconvolution criteria: Yes  
Included in protocol analysis: No  
Protocol: N/A  
Filename: Bin1\_plateB1\_D4.fcs  
Split 1: Petrol shading  
Split 2: Green shading  
Split 3: Violet shading

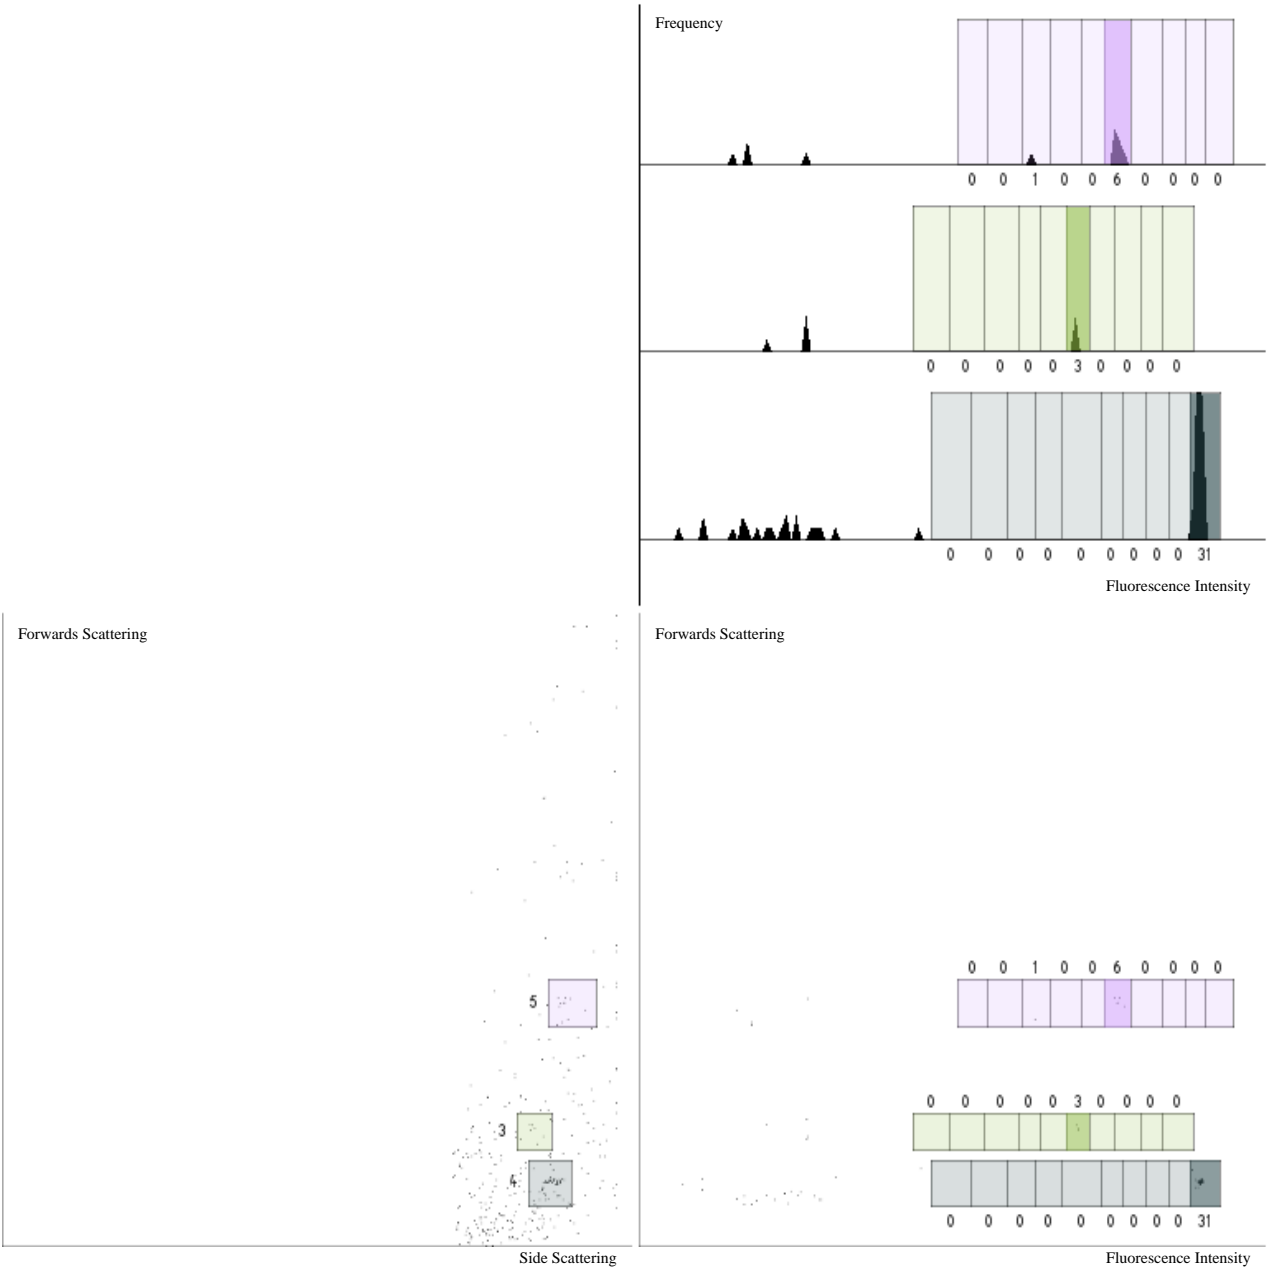

ANNEX 3: TAG DECONVOLUTION - BEAD 110

Passes flow sorting criteria: Yes  
Passes tag deconvolution criteria: Yes  
Included in protocol analysis: Yes  
Protocol: 7, 3, 1, 1  
Filename: Bin1\_plateB1\_D6.fcs  
Split 1: Petrol shading  
Split 2: Green shading  
Split 3: Violet shading

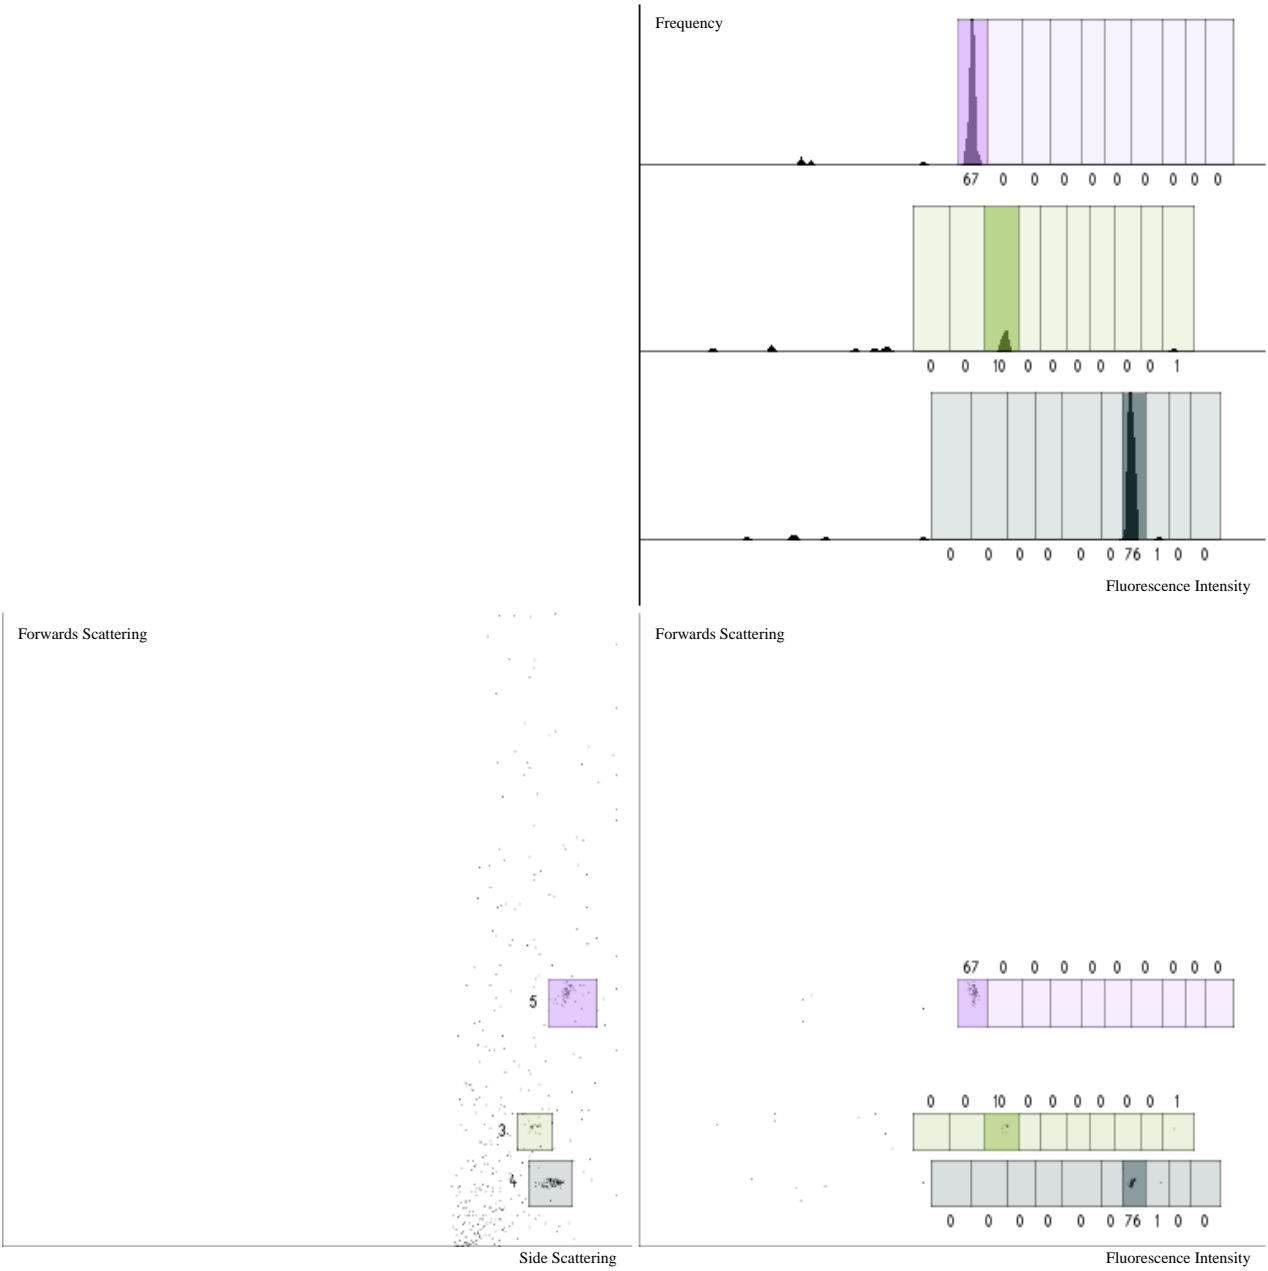



ANNEX 3: TAG DECONVOLUTION - BEAD 111

Passes flow sorting criteria: Yes  
Passes tag deconvolution criteria: No  
Included in protocol analysis: No  
Protocol: N/A  
Filename: Bin1\_plateB1\_D7.fcs  
Split 1: Petrol shading  
Split 2: Green shading  
Split 3: Violet shading

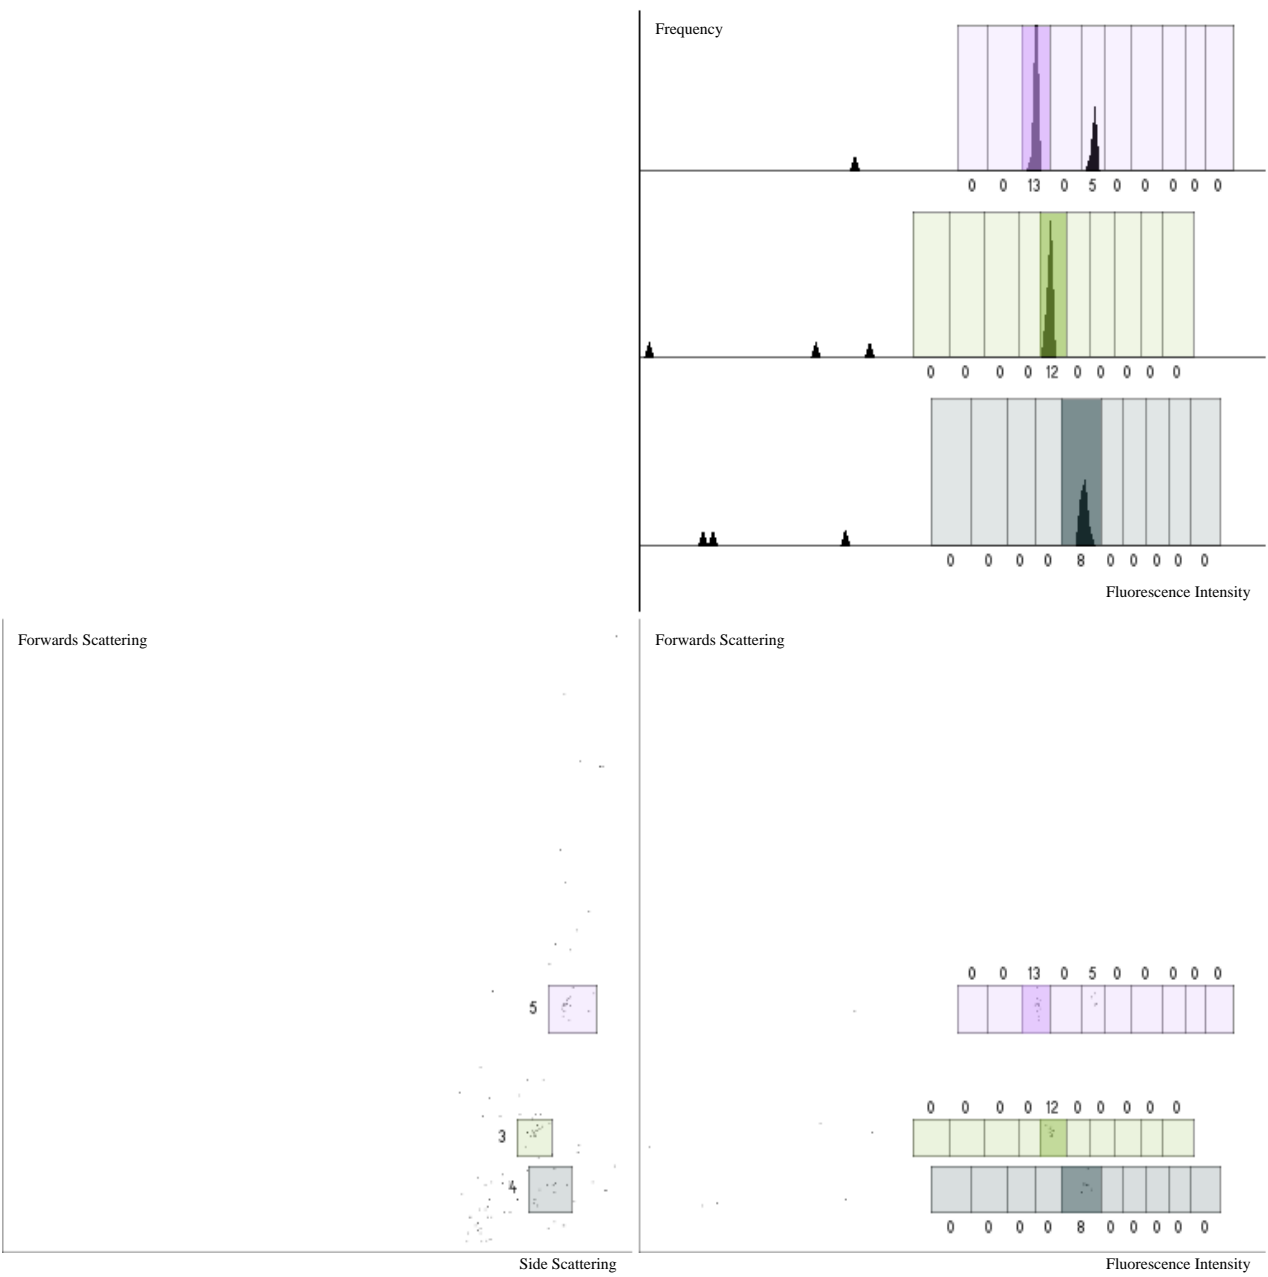

ANNEX 3: TAG DECONVOLUTION - BEAD 112

Passes flow sorting criteria: Yes  
Passes tag deconvolution criteria: Yes  
Included in protocol analysis: Yes  
Protocol: 8, 4, 7, 1  
Filename: Bin1\_plateB1\_E3.fcs  
Split 1: Petrol shading  
Split 2: Green shading  
Split 3: Violet shading

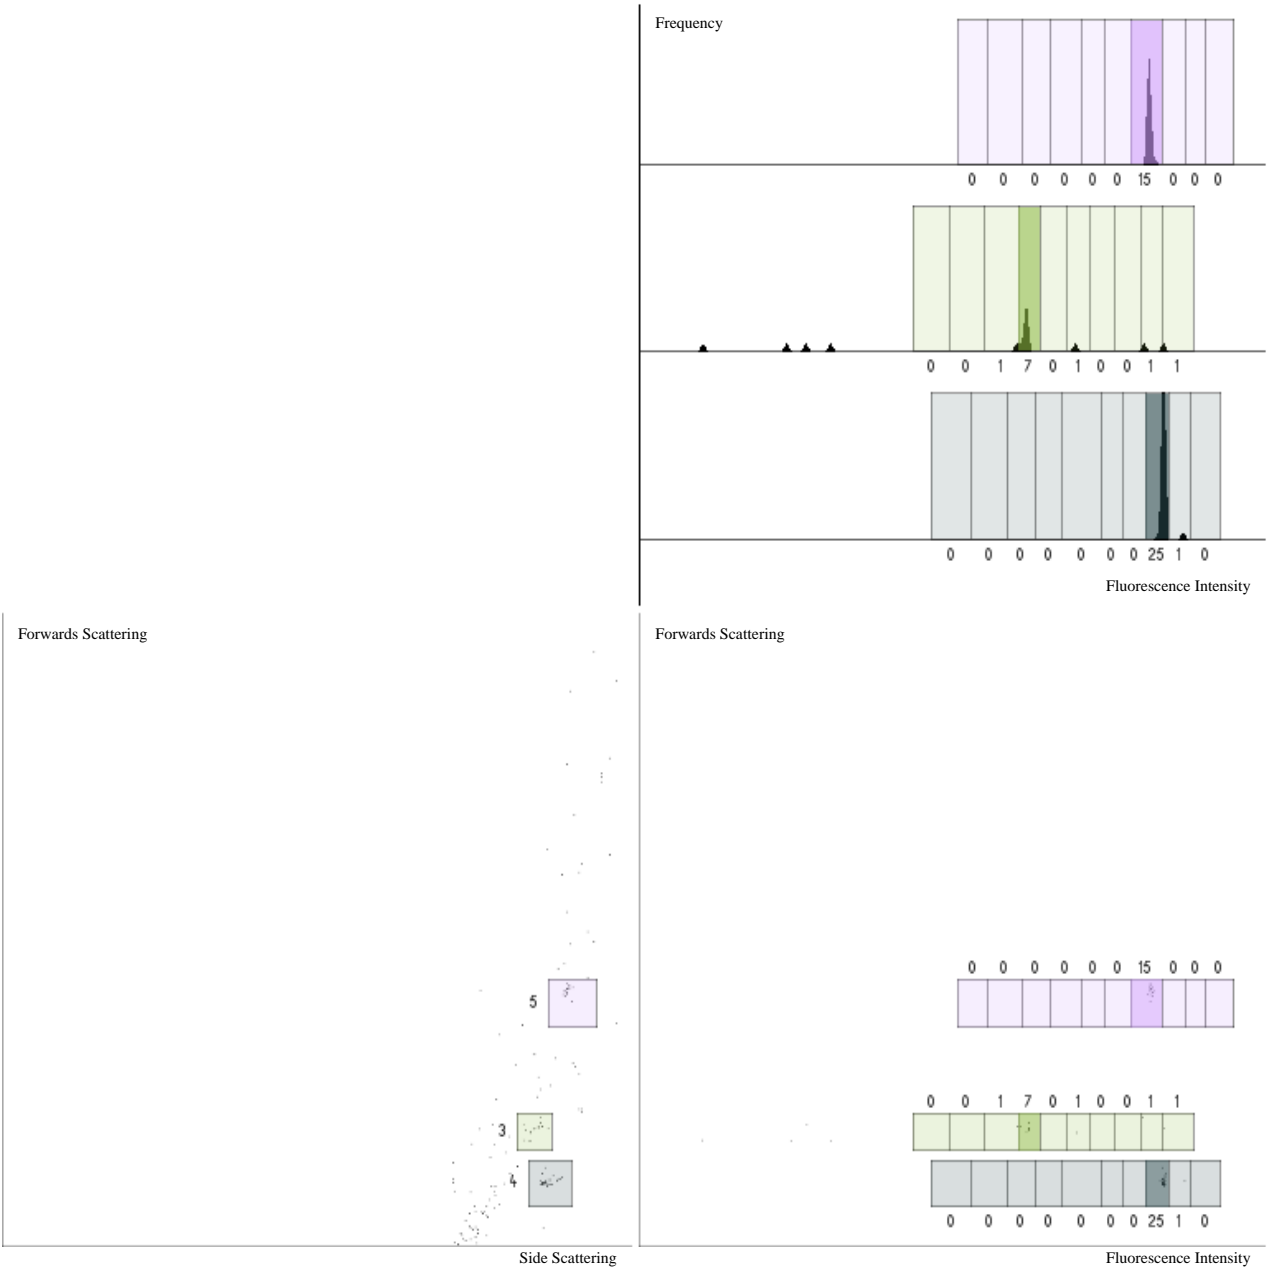

ANNEX 3: TAG DECONVOLUTION - BEAD 113

Passes flow sorting criteria: Yes  
Passes tag deconvolution criteria: Yes  
Included in protocol analysis: Yes  
Protocol: 9, 2, 10, 1  
Filename: Bin1\_plateB1\_E6.fcs  
Split 1: Petrol shading  
Split 2: Green shading  
Split 3: Violet shading

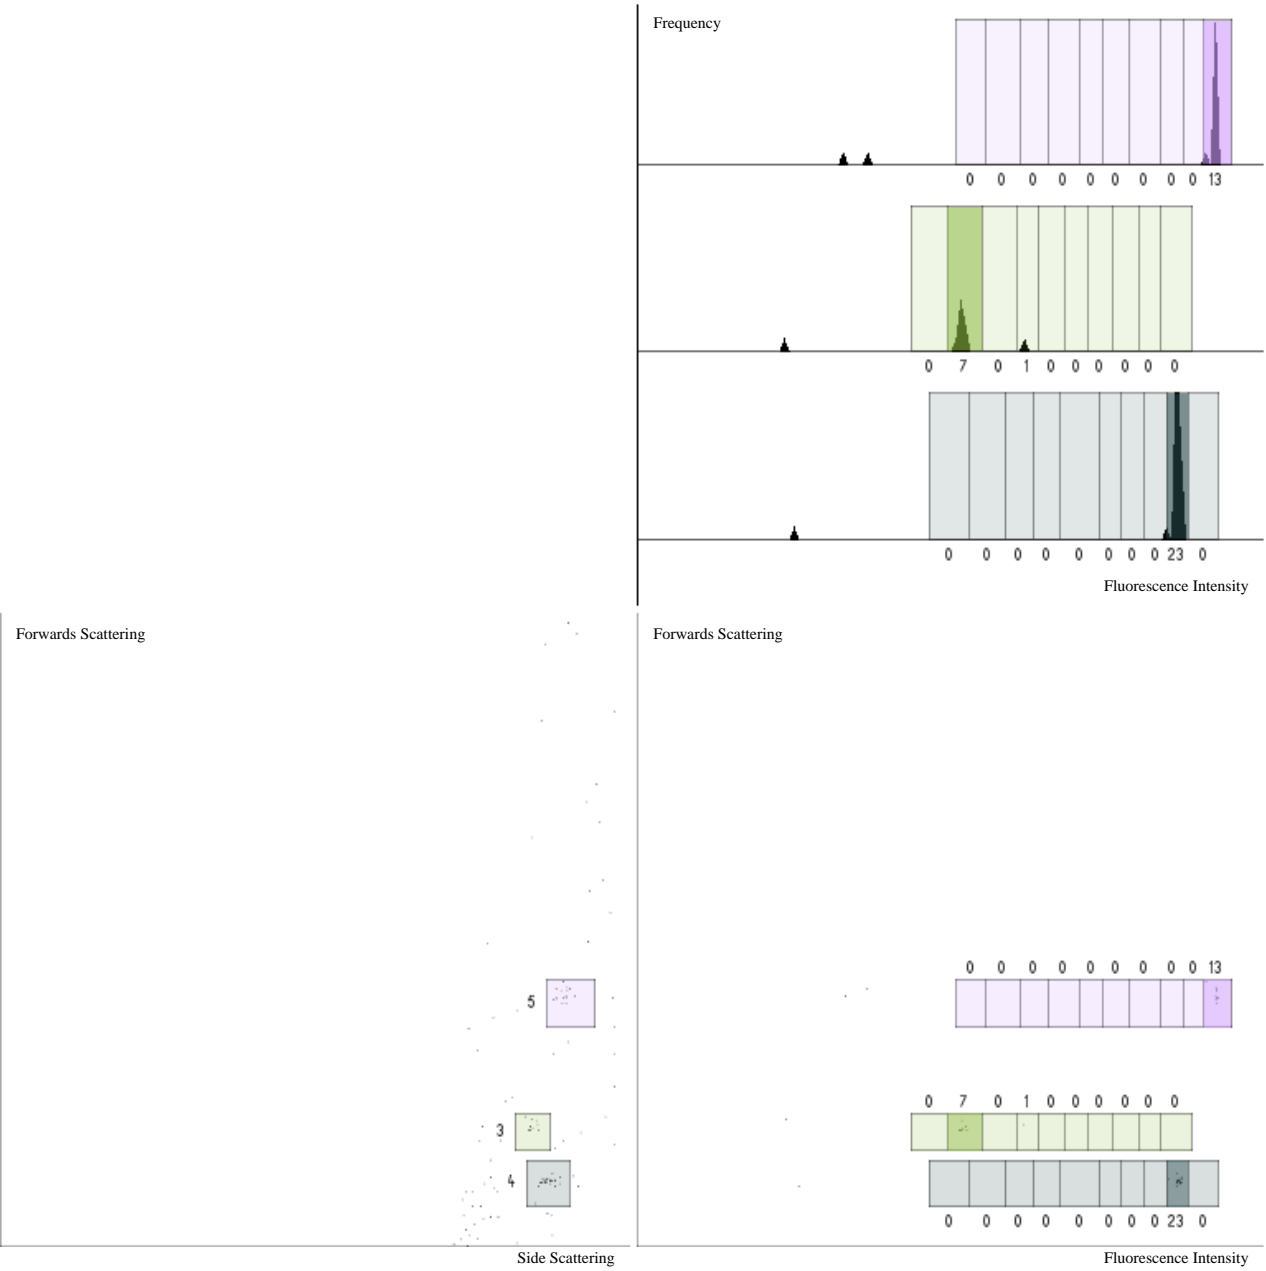

ANNEX 3: TAG DECONVOLUTION - BEAD 114

Passes flow sorting criteria: Yes  
Passes tag deconvolution criteria: Yes  
Included in protocol analysis: Yes  
Protocol: 4, 10, 4, 1  
Filename: Bin1\_plateB1\_E7.fcs  
Split 1: Petrol shading  
Split 2: Green shading  
Split 3: Violet shading

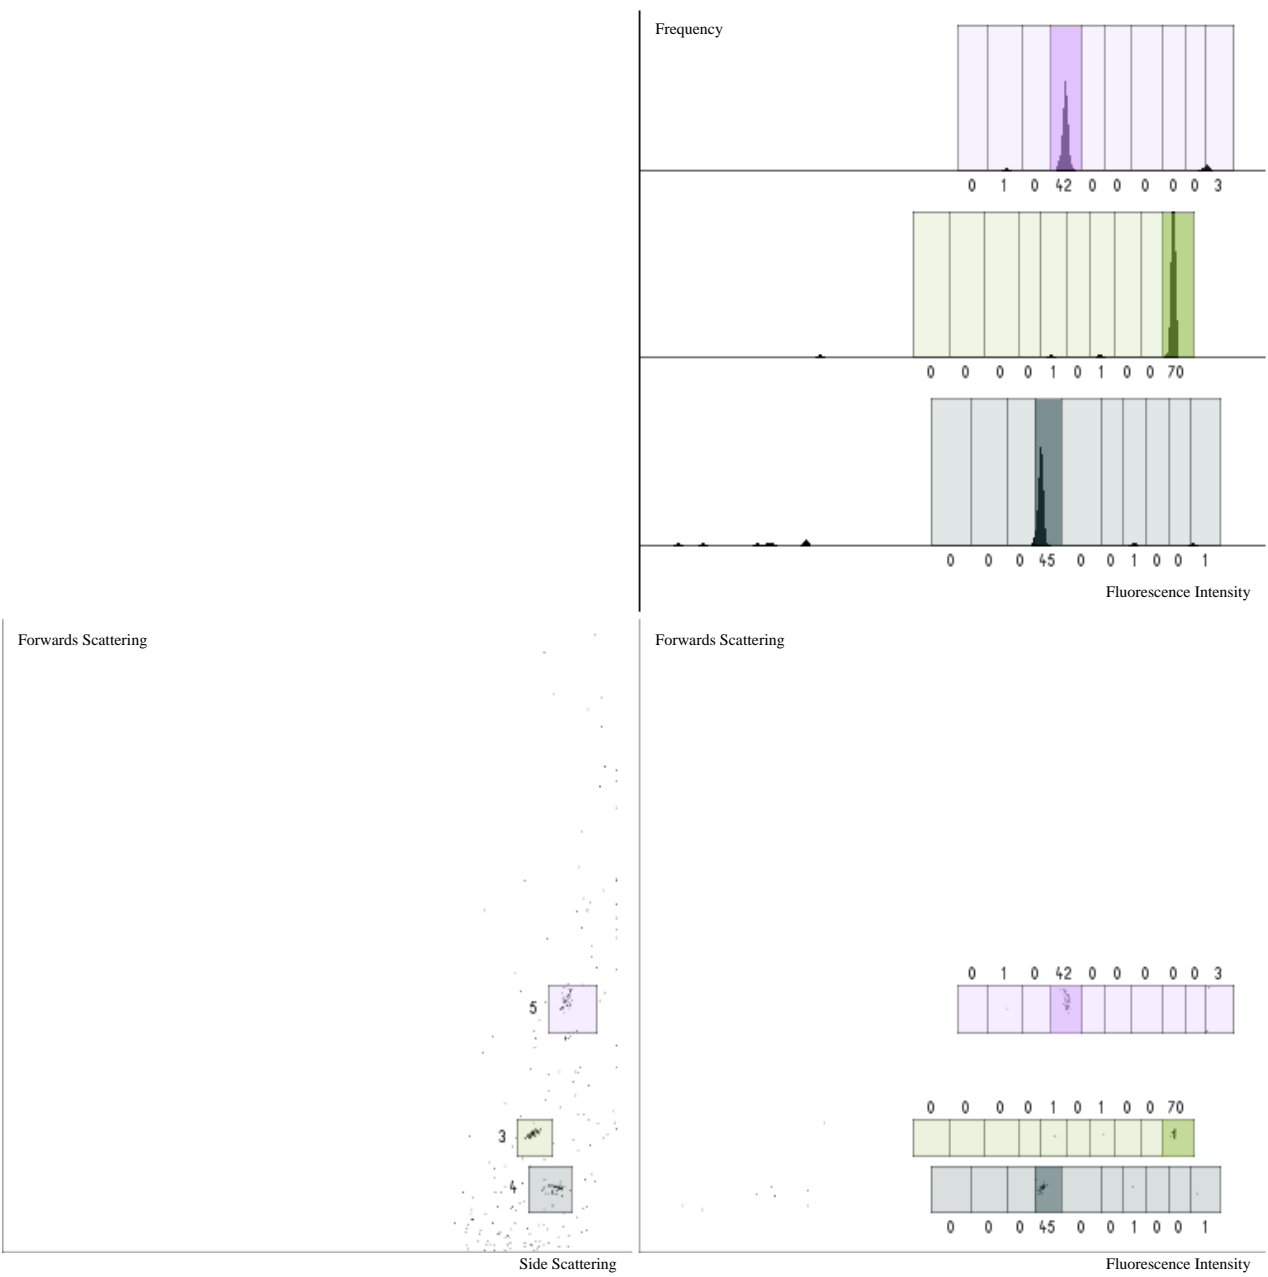

ANNEX 3: TAG DECONVOLUTION - BEAD 115

Passes flow sorting criteria: Yes  
Passes tag deconvolution criteria: No  
Included in protocol analysis: No  
Protocol: N/A  
Filename: Bin1\_plateB1\_F1.fcs  
Split 1: Petrol shading  
Split 2: Green shading  
Split 3: Violet shading

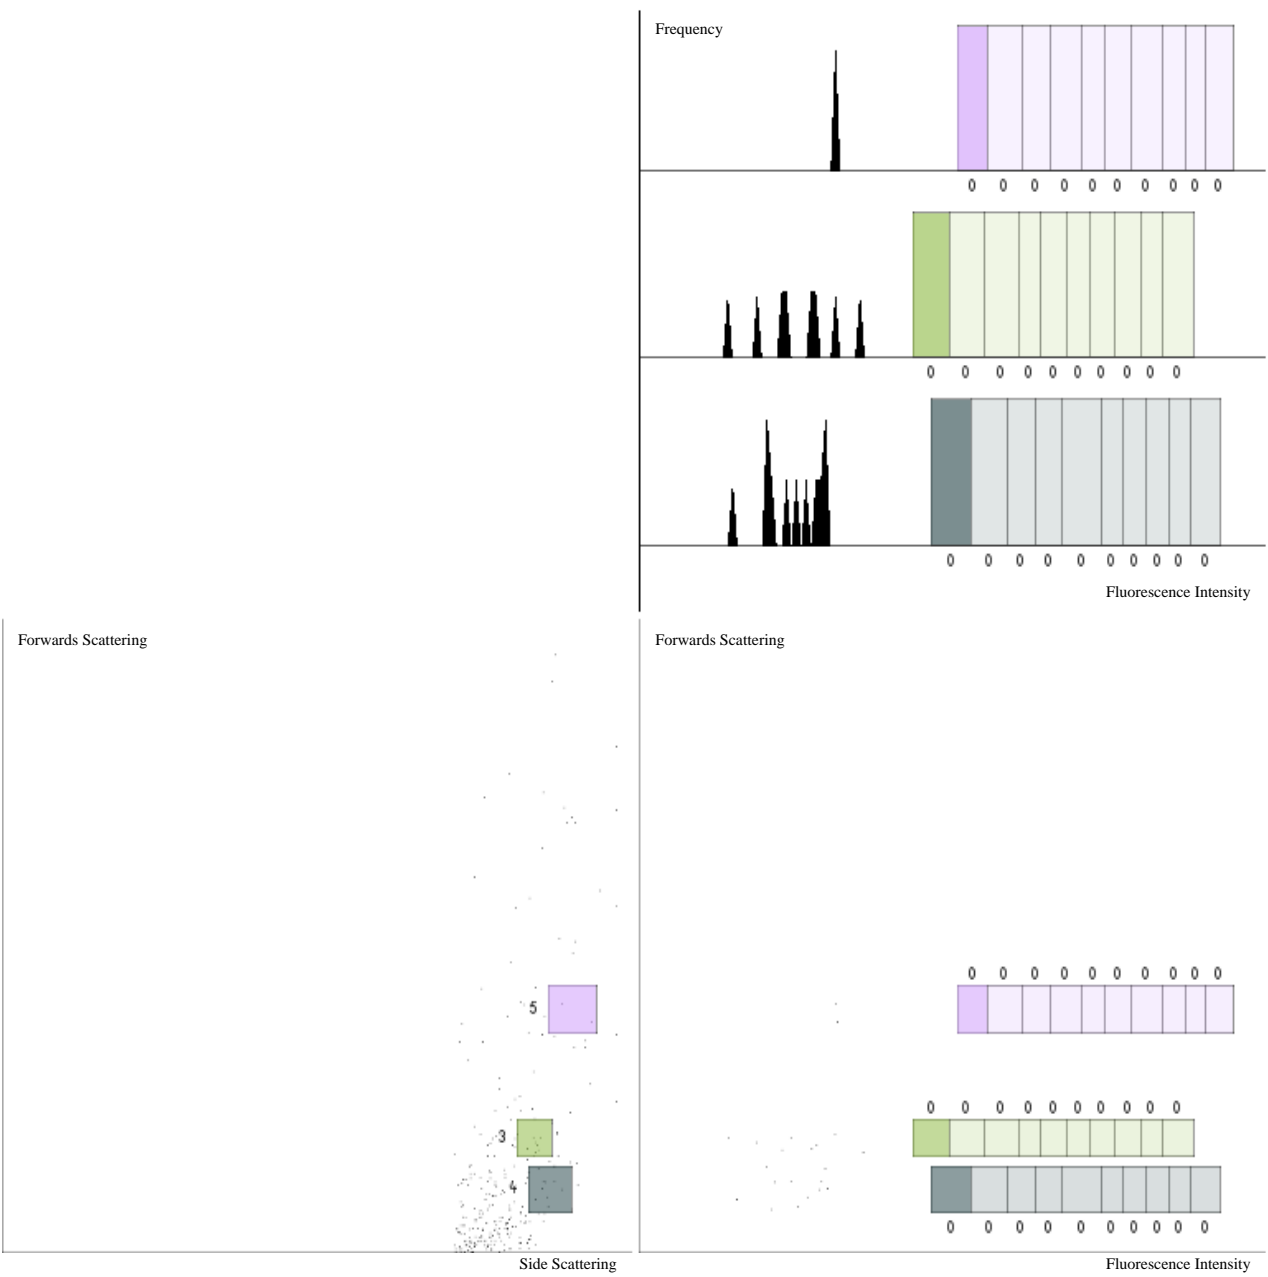

ANNEX 3: TAG DECONVOLUTION - BEAD 116

Passes flow sorting criteria: Yes  
Passes tag deconvolution criteria: Yes  
Included in protocol analysis: Yes  
Protocol: 3, 10, 4, 1  
Filename: Bin1\_plateB1\_F2.fcs  
Split 1: Petrol shading  
Split 2: Green shading  
Split 3: Violet shading

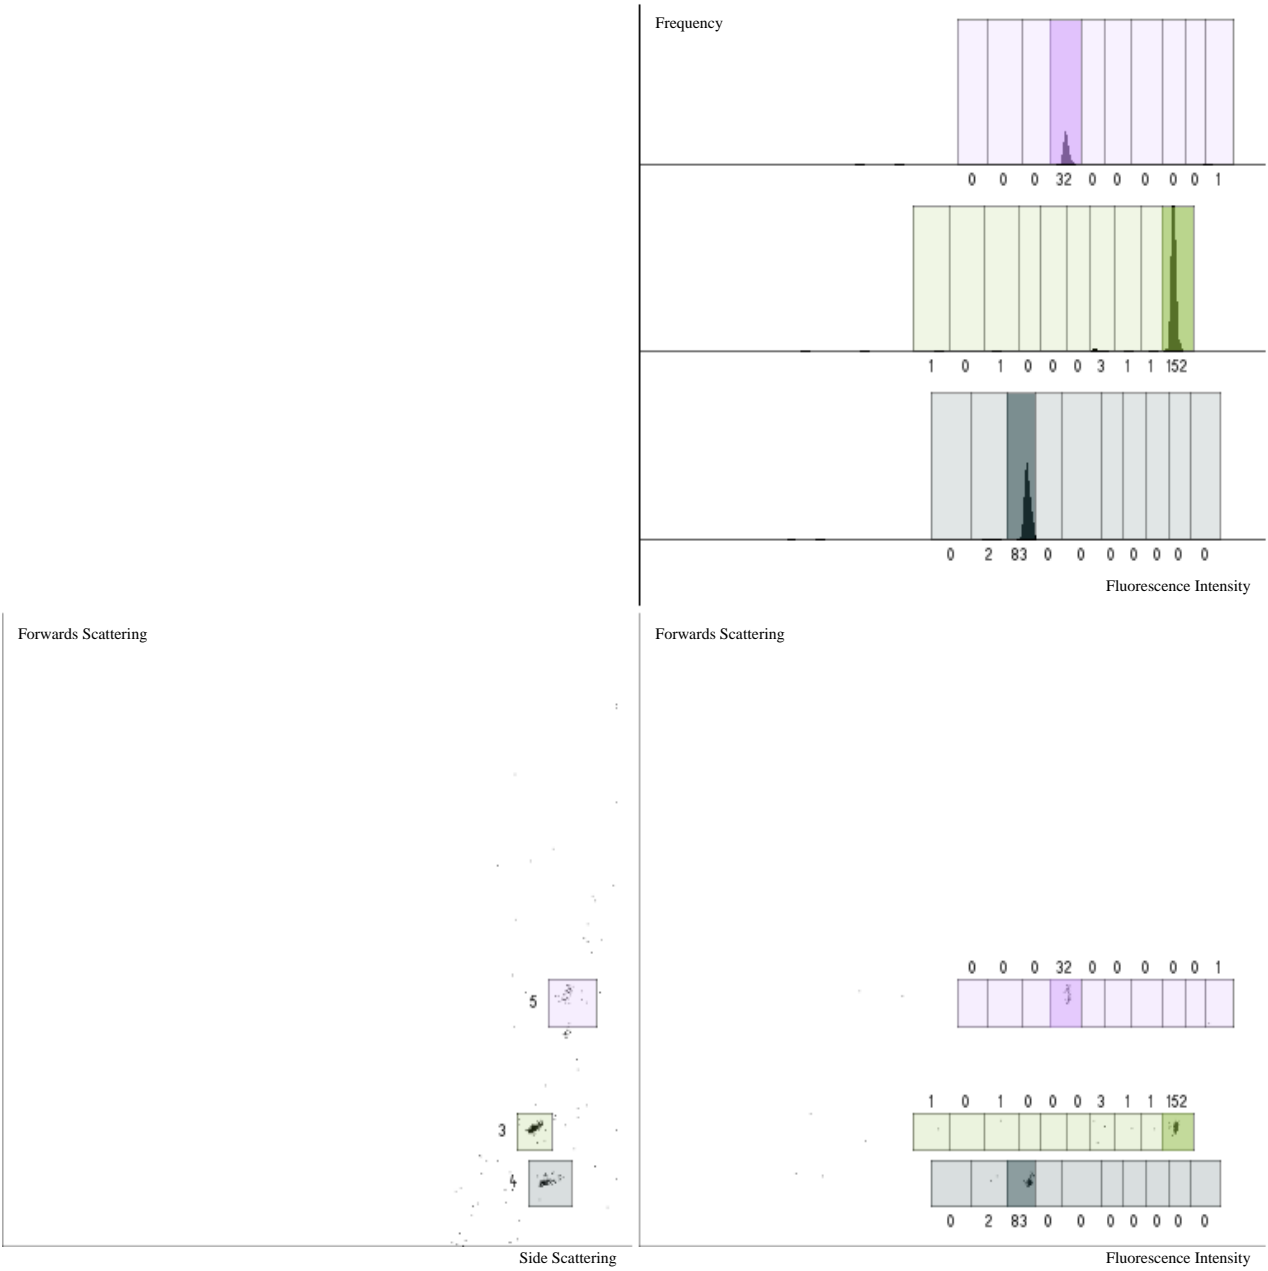

ANNEX 3: TAG DECONVOLUTION - BEAD 117

Passes flow sorting criteria: Yes  
Passes tag deconvolution criteria: Yes  
Included in protocol analysis: Yes  
Protocol: 10, 6, 1, 1  
Filename: Bin1\_plateB1\_F4.fcs  
Split 1: Petrol shading  
Split 2: Green shading  
Split 3: Violet shading

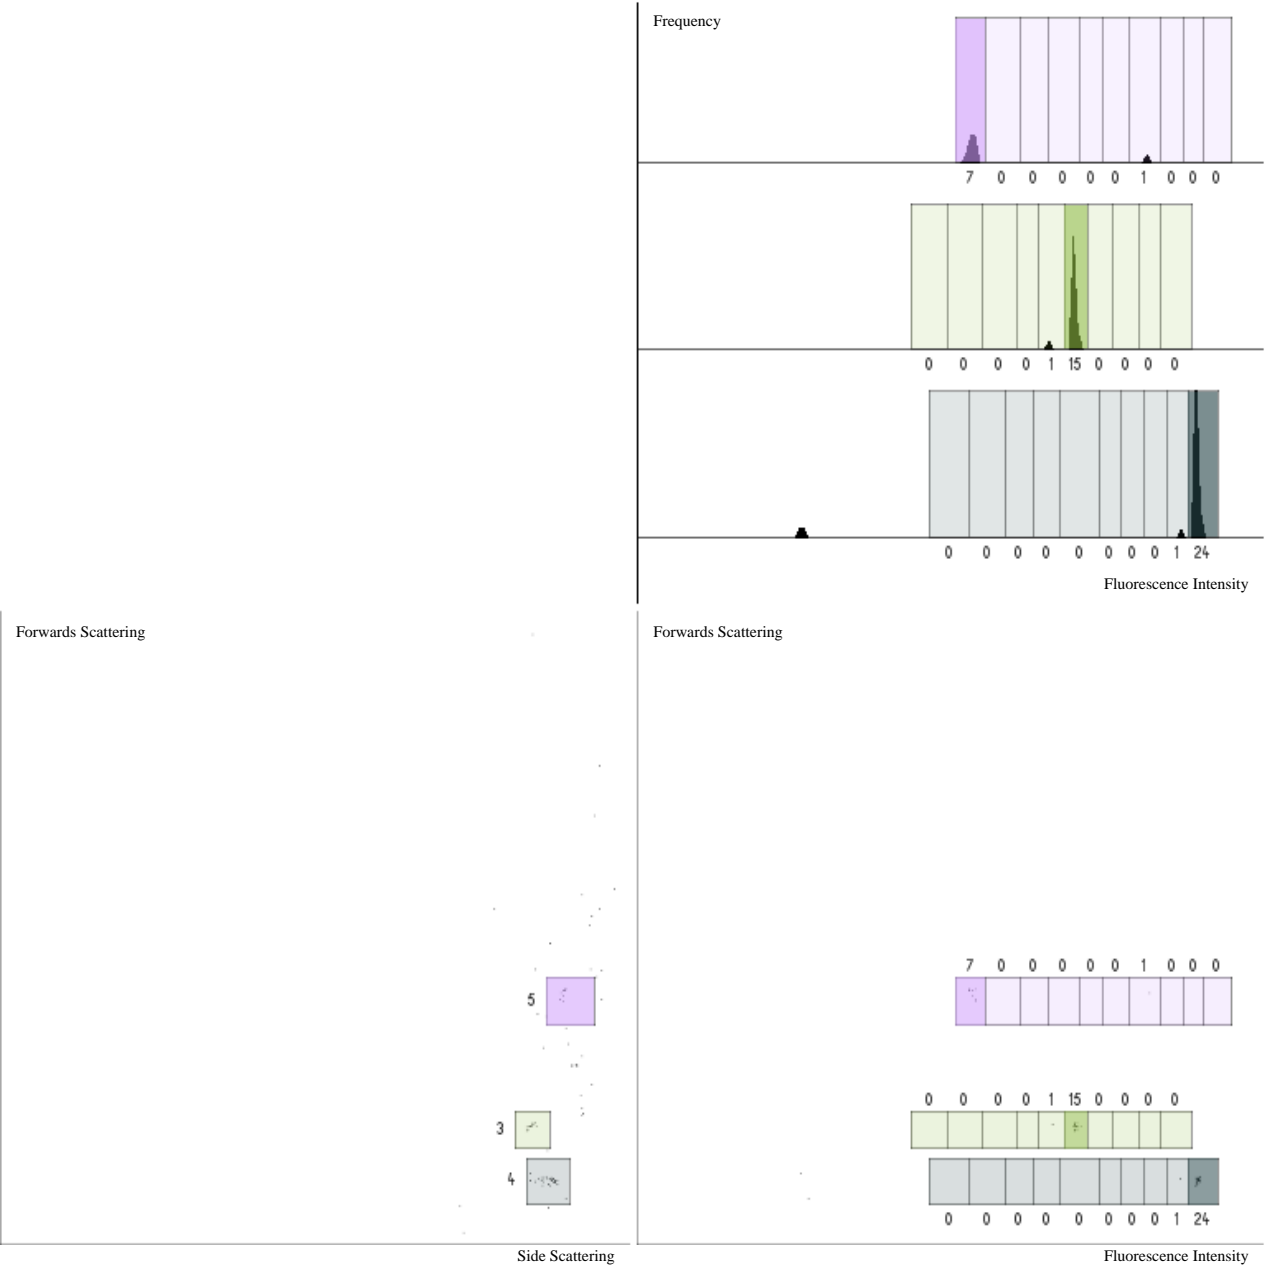

ANNEX 3: TAG DECONVOLUTION - BEAD 118

Passes flow sorting criteria: Yes  
Passes tag deconvolution criteria: Yes  
Included in protocol analysis: Yes  
Protocol: 9, 7, 3, 1  
Filename: Bin1\_plateB1\_F5.fcs  
Split 1: Petrol shading  
Split 2: Green shading  
Split 3: Violet shading

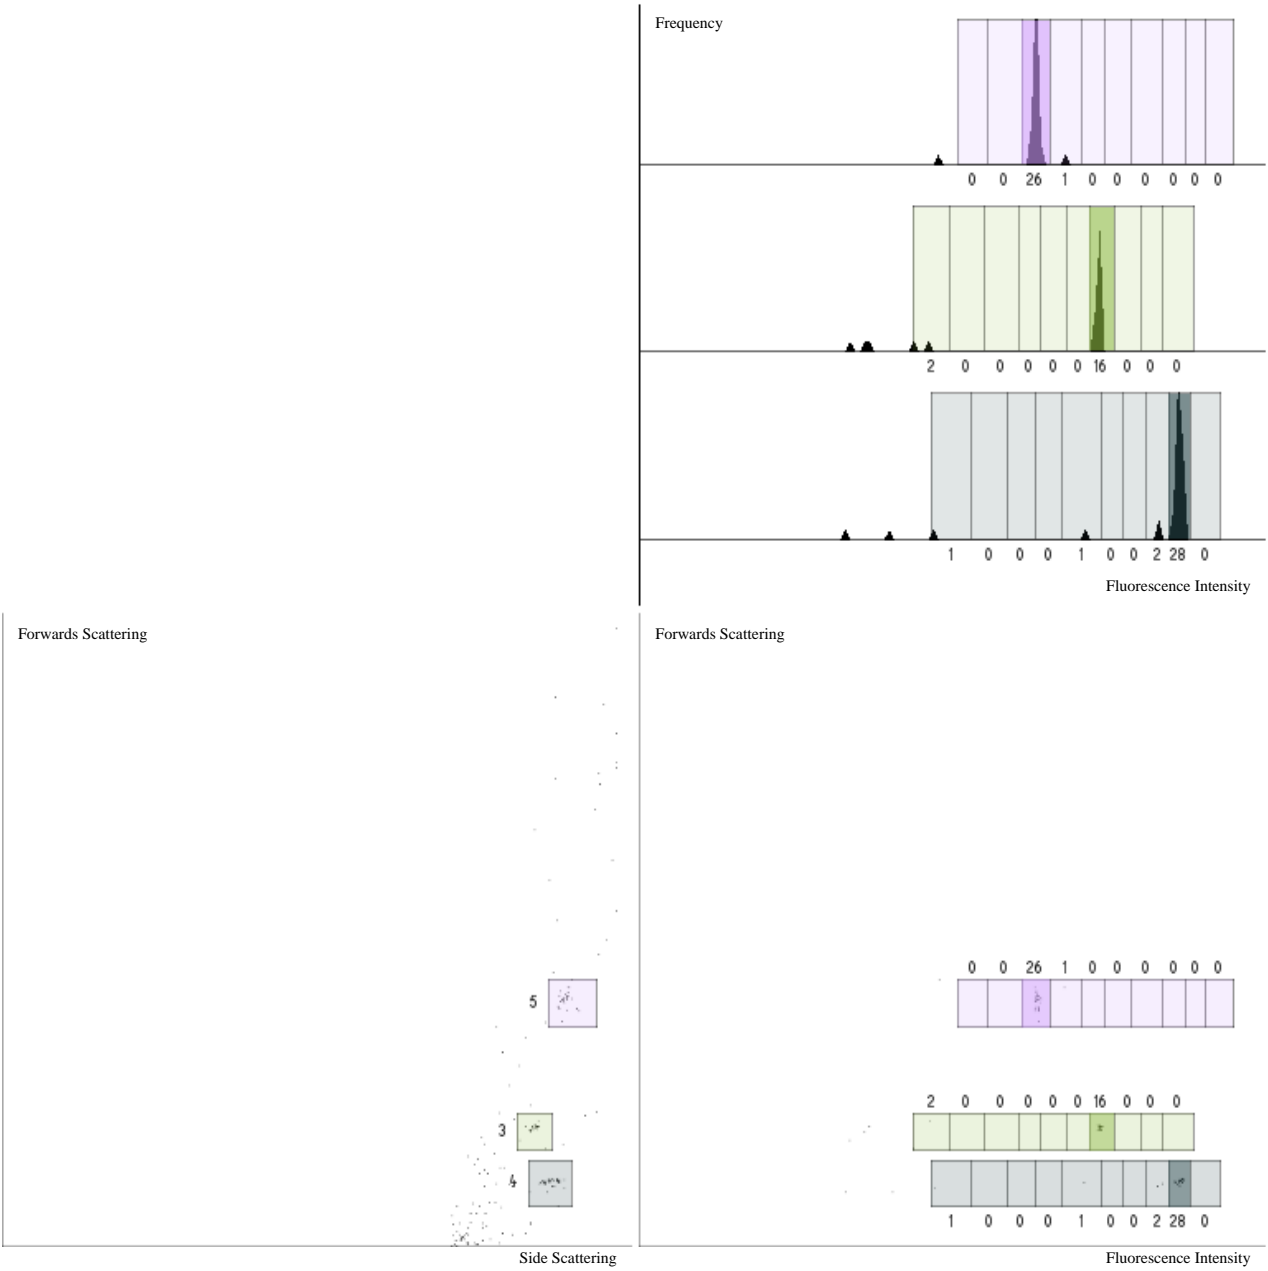



ANNEX 3: TAG DECONVOLUTION - BEAD 119

Passes flow sorting criteria: Yes  
Passes tag deconvolution criteria: Yes  
Included in protocol analysis: Yes  
Protocol: 4, 1, 2, 1  
Filename: Bin1\_plateB1\_F6.fcs  
Split 1: Petrol shading  
Split 2: Green shading  
Split 3: Violet shading

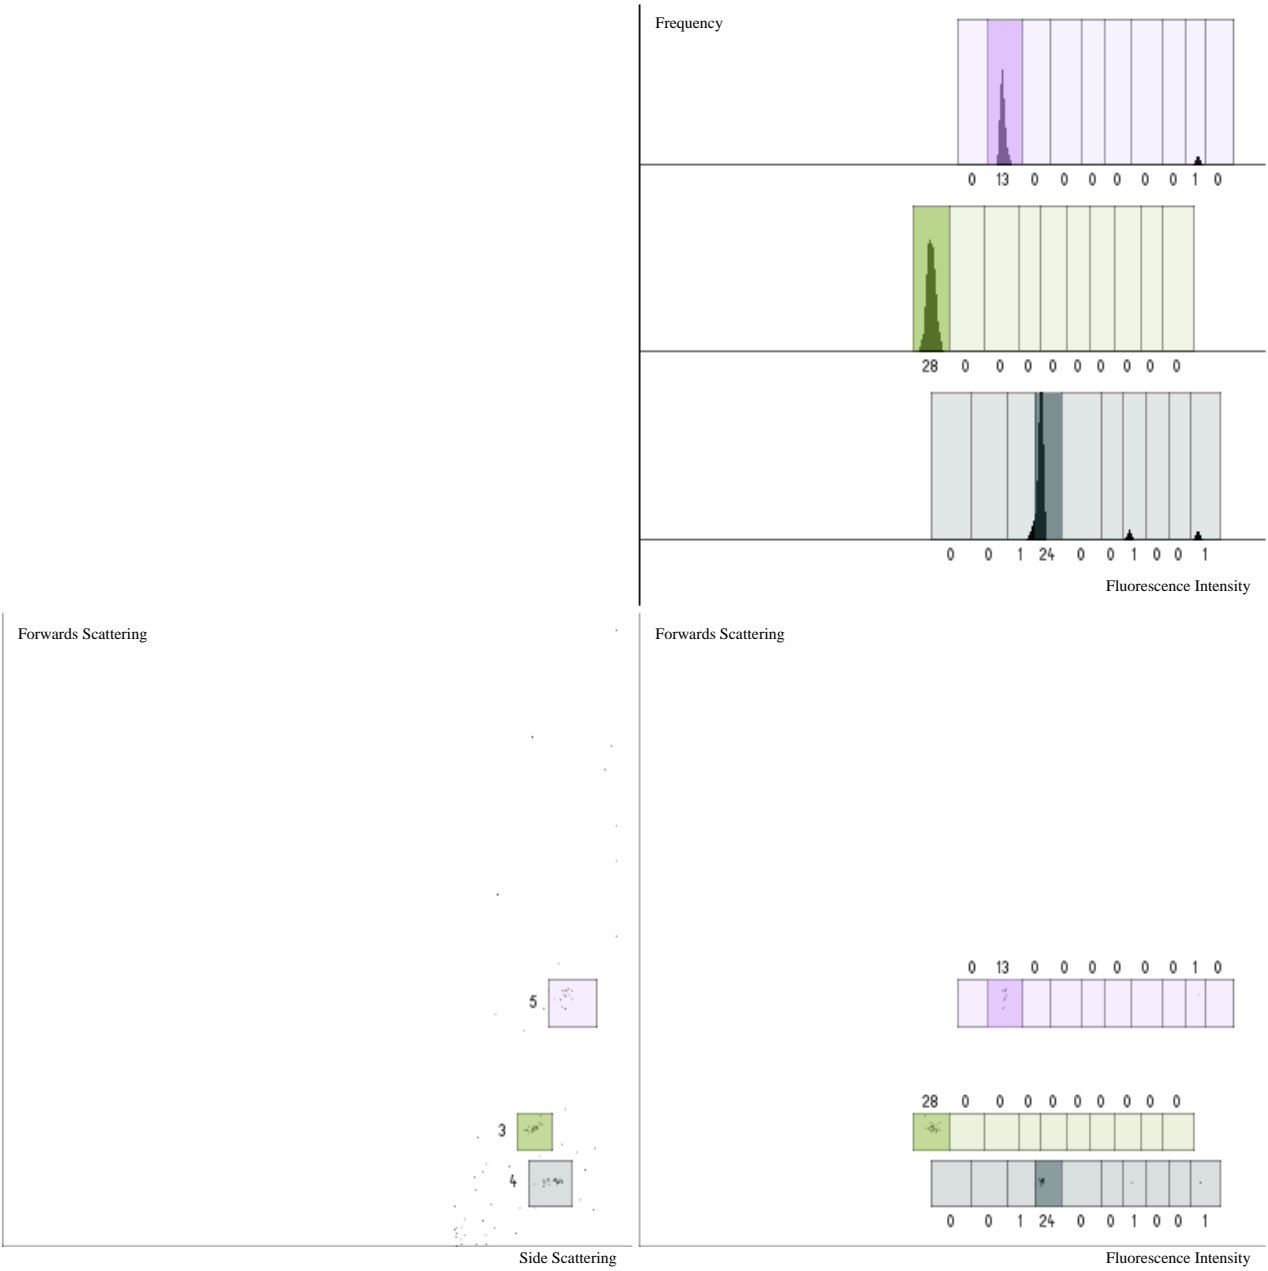

ANNEX 3: TAG DECONVOLUTION - BEAD 120

Passes flow sorting criteria: Yes  
Passes tag deconvolution criteria: Yes  
Included in protocol analysis: Yes  
Protocol: 10, 2, 9, 1  
Filename: Bin1\_plateB1\_F7.fcs  
Split 1: Petrol shading  
Split 2: Green shading  
Split 3: Violet shading

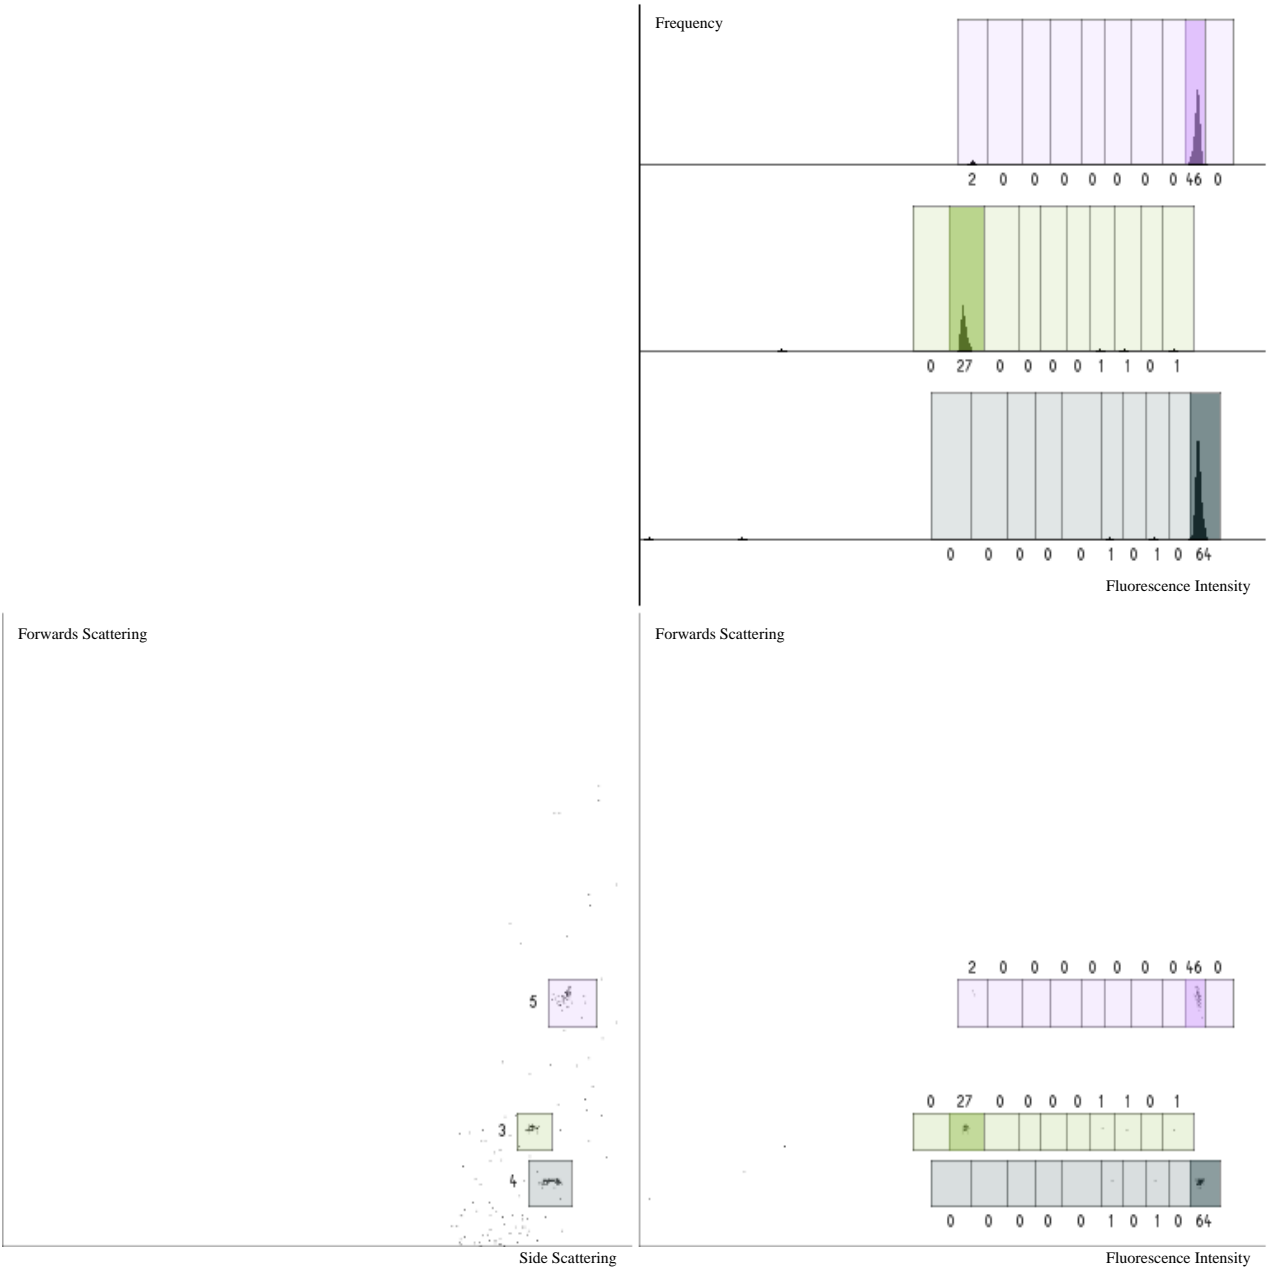

ANNEX 3: TAG DECONVOLUTION - BEAD 121

Passes flow sorting criteria: Yes  
Passes tag deconvolution criteria: Yes  
Included in protocol analysis: Yes  
Protocol: 5, 9, 2, 1  
Filename: Bin1\_plateB1\_G2.fcs  
Split 1: Petrol shading  
Split 2: Green shading  
Split 3: Violet shading

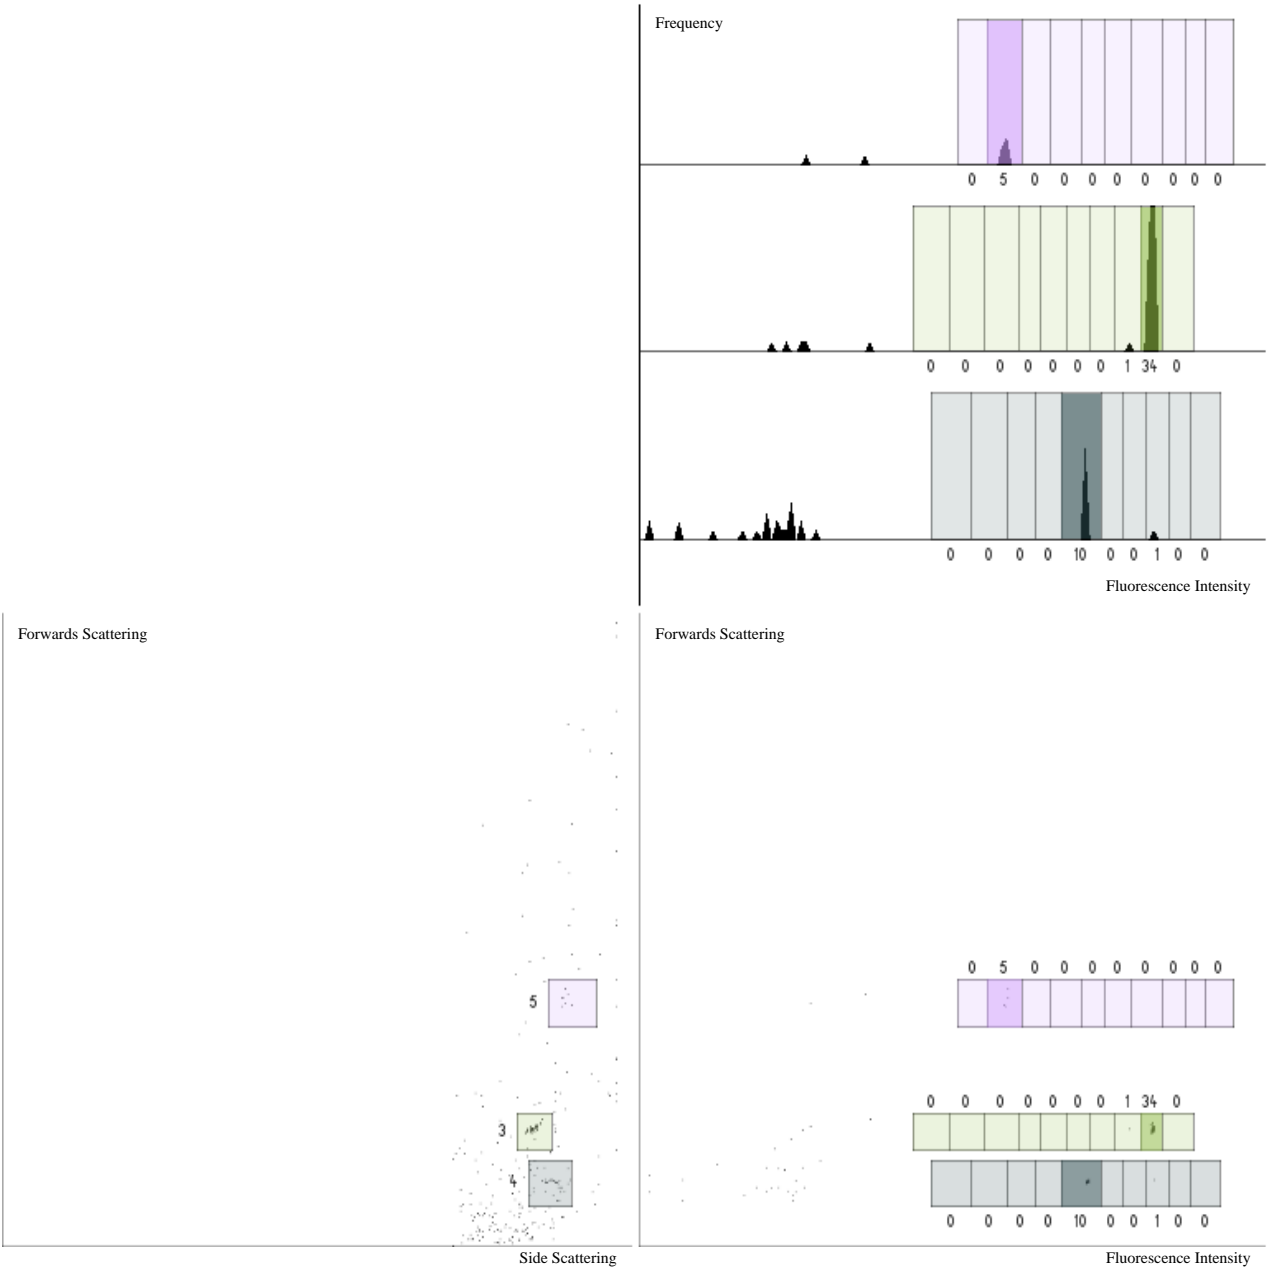

ANNEX 3: TAG DECONVOLUTION - BEAD 122

Passes flow sorting criteria: Yes  
Passes tag deconvolution criteria: No  
Included in protocol analysis: No  
Protocol: N/A  
Filename: Bin1\_plateB1\_G3.fcs  
Split 1: Petrol shading  
Split 2: Green shading  
Split 3: Violet shading

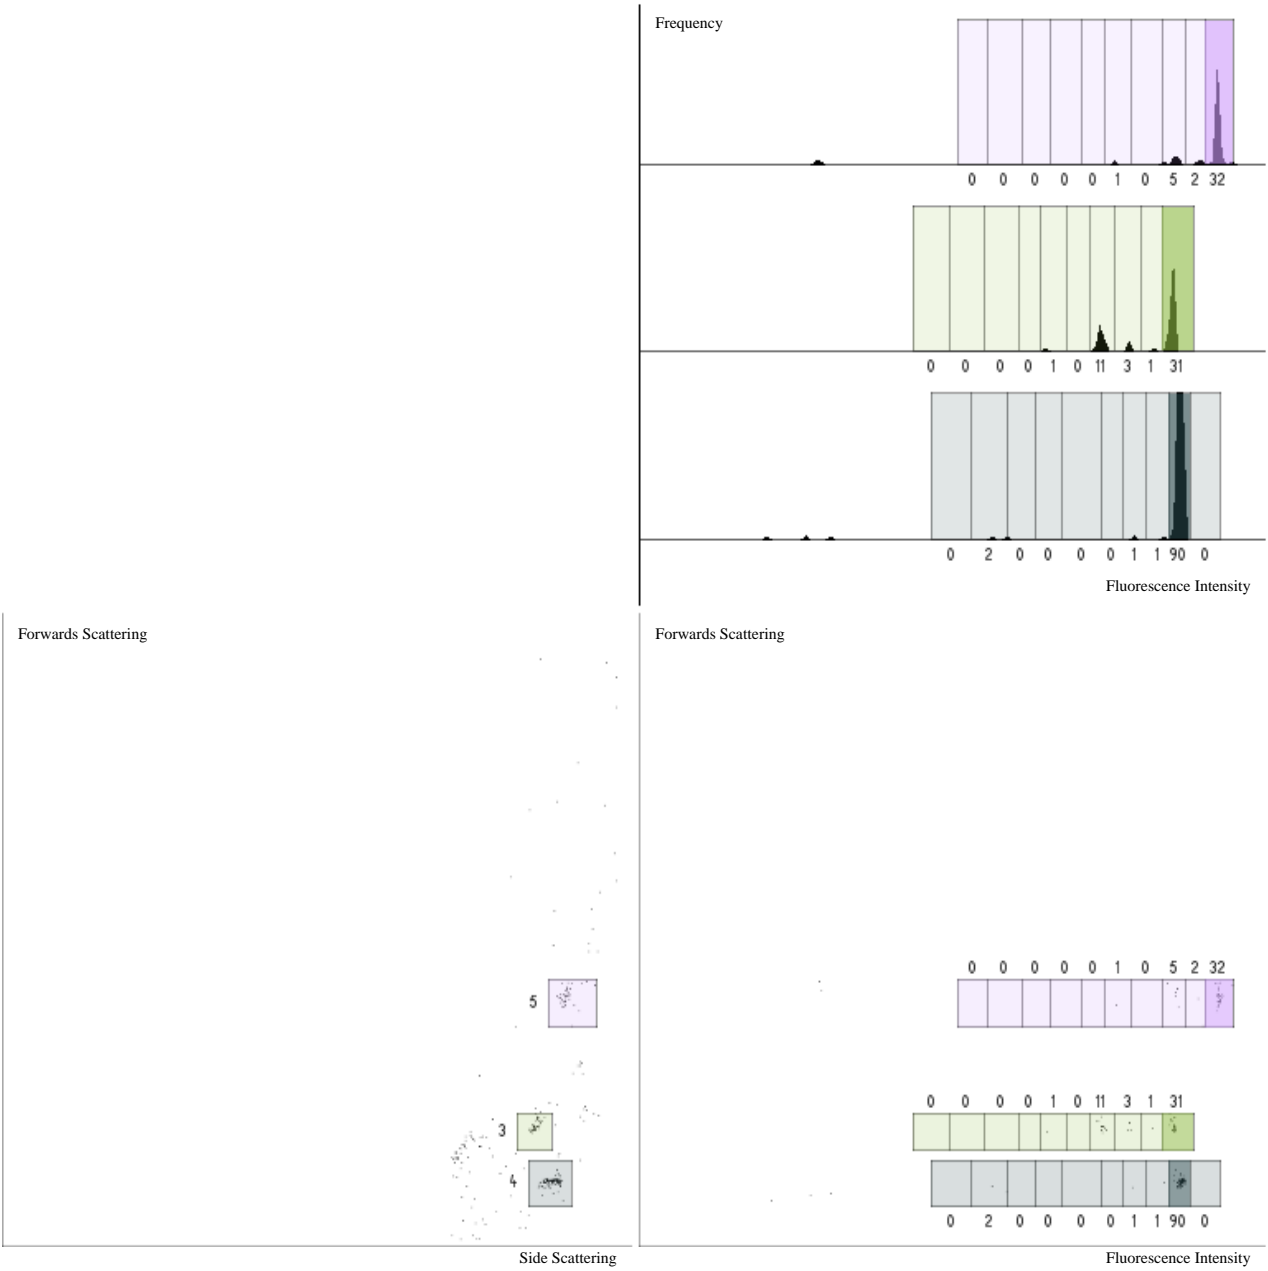

ANNEX 3: TAG DECONVOLUTION - BEAD 123

Passes flow sorting criteria: Yes  
Passes tag deconvolution criteria: No  
Included in protocol analysis: No  
Protocol: N/A  
Filename: Bin1\_plateB1\_G4.fcs  
Split 1: Petrol shading  
Split 2: Green shading  
Split 3: Violet shading

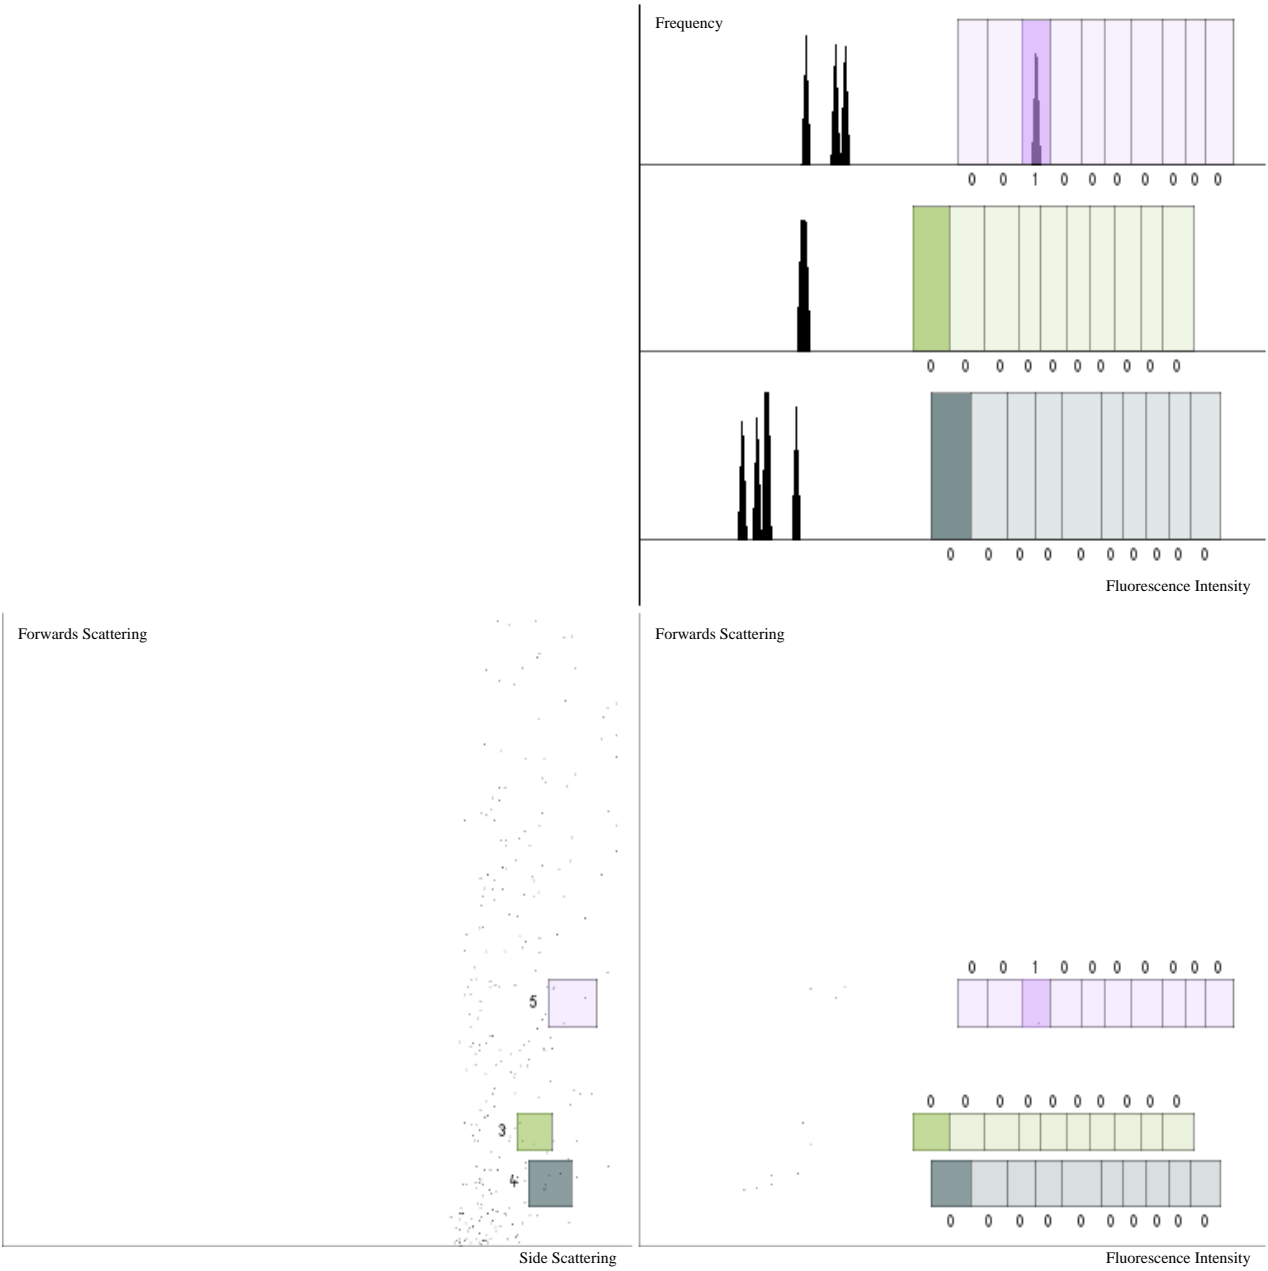

ANNEX 3: TAG DECONVOLUTION - BEAD 124

Passes flow sorting criteria: Yes  
Passes tag deconvolution criteria: Yes  
Included in protocol analysis: Yes  
Protocol: 8, 10, 9, 1  
Filename: Bin1\_plateB1\_G5.fcs  
Split 1: Petrol shading  
Split 2: Green shading  
Split 3: Violet shading

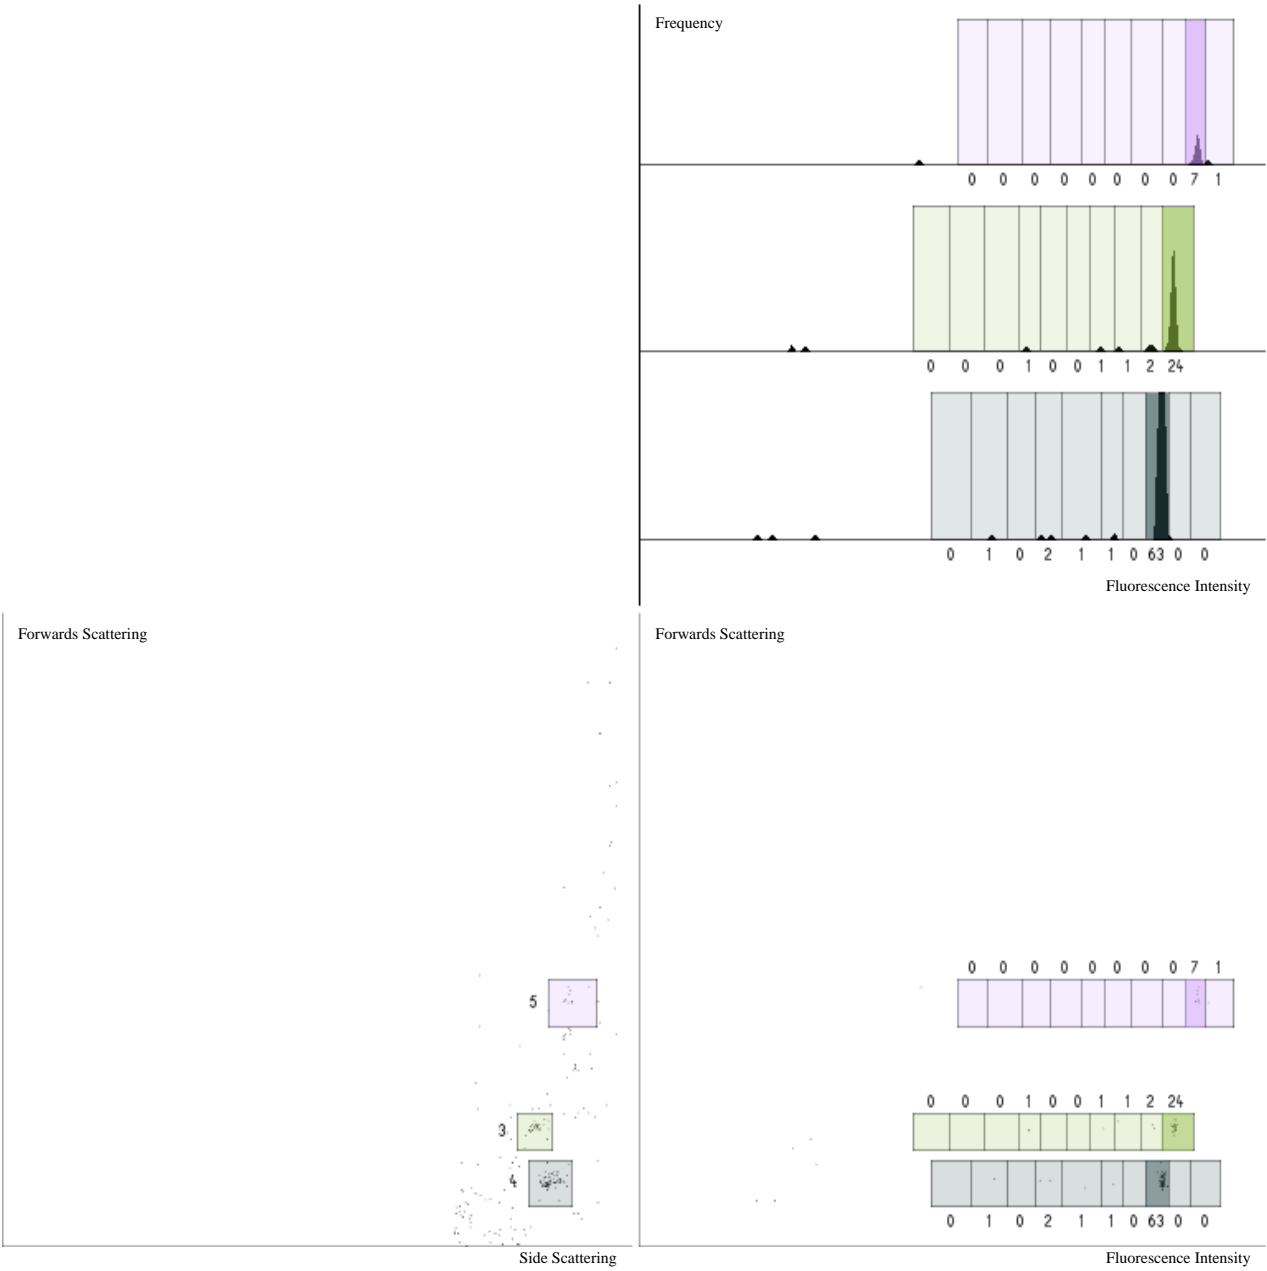

ANNEX 3: TAG DECONVOLUTION - BEAD 125

Passes flow sorting criteria: Yes  
Passes tag deconvolution criteria: Yes  
Included in protocol analysis: Yes  
Protocol: 1, 4, 10, 1  
Filename: Bin1\_plateB1\_H1.fcs  
Split 1: Petrol shading  
Split 2: Green shading  
Split 3: Violet shading

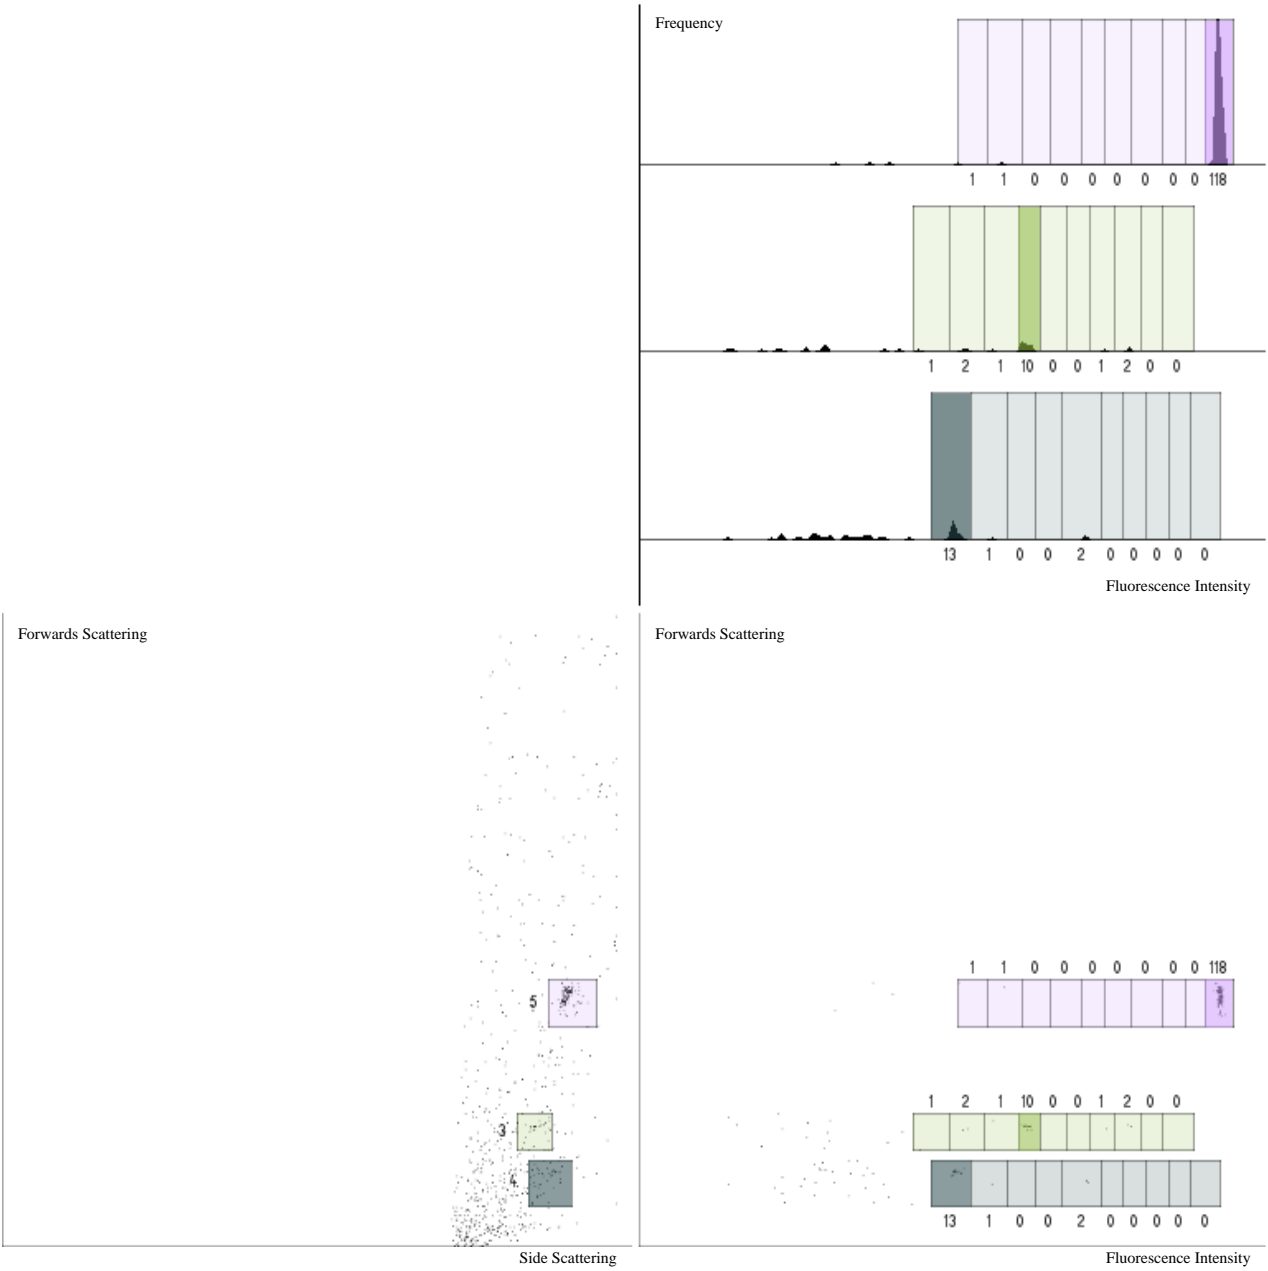

ANNEX 3: TAG DECONVOLUTION - BEAD 126

Passes flow sorting criteria: Yes  
Passes tag deconvolution criteria: Yes  
Included in protocol analysis: Yes  
Protocol: 5, 9, 5, 1  
Filename: Bin1\_plateB1\_H2.fcs  
Split 1: Petrol shading  
Split 2: Green shading  
Split 3: Violet shading

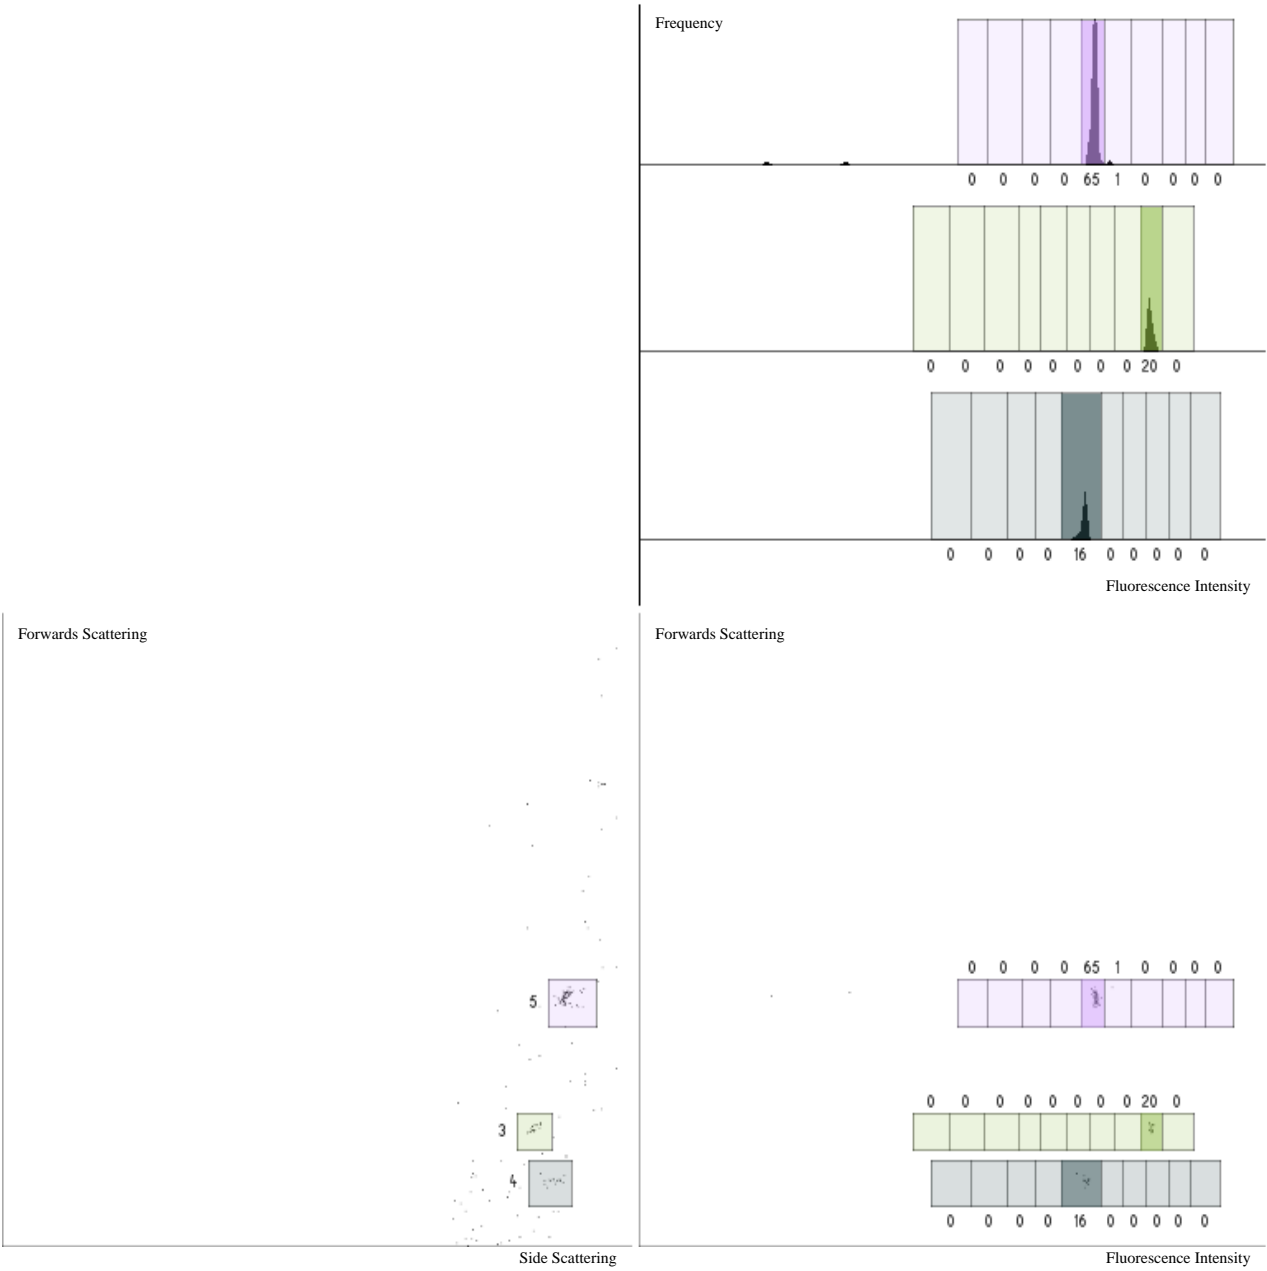



ANNEX 3: TAG DECONVOLUTION - BEAD 127

Passes flow sorting criteria: Yes  
Passes tag deconvolution criteria: No  
Included in protocol analysis: No  
Protocol: N/A  
Filename: Bin1\_plateB1\_H3.fcs  
Split 1: Petrol shading  
Split 2: Green shading  
Split 3: Violet shading

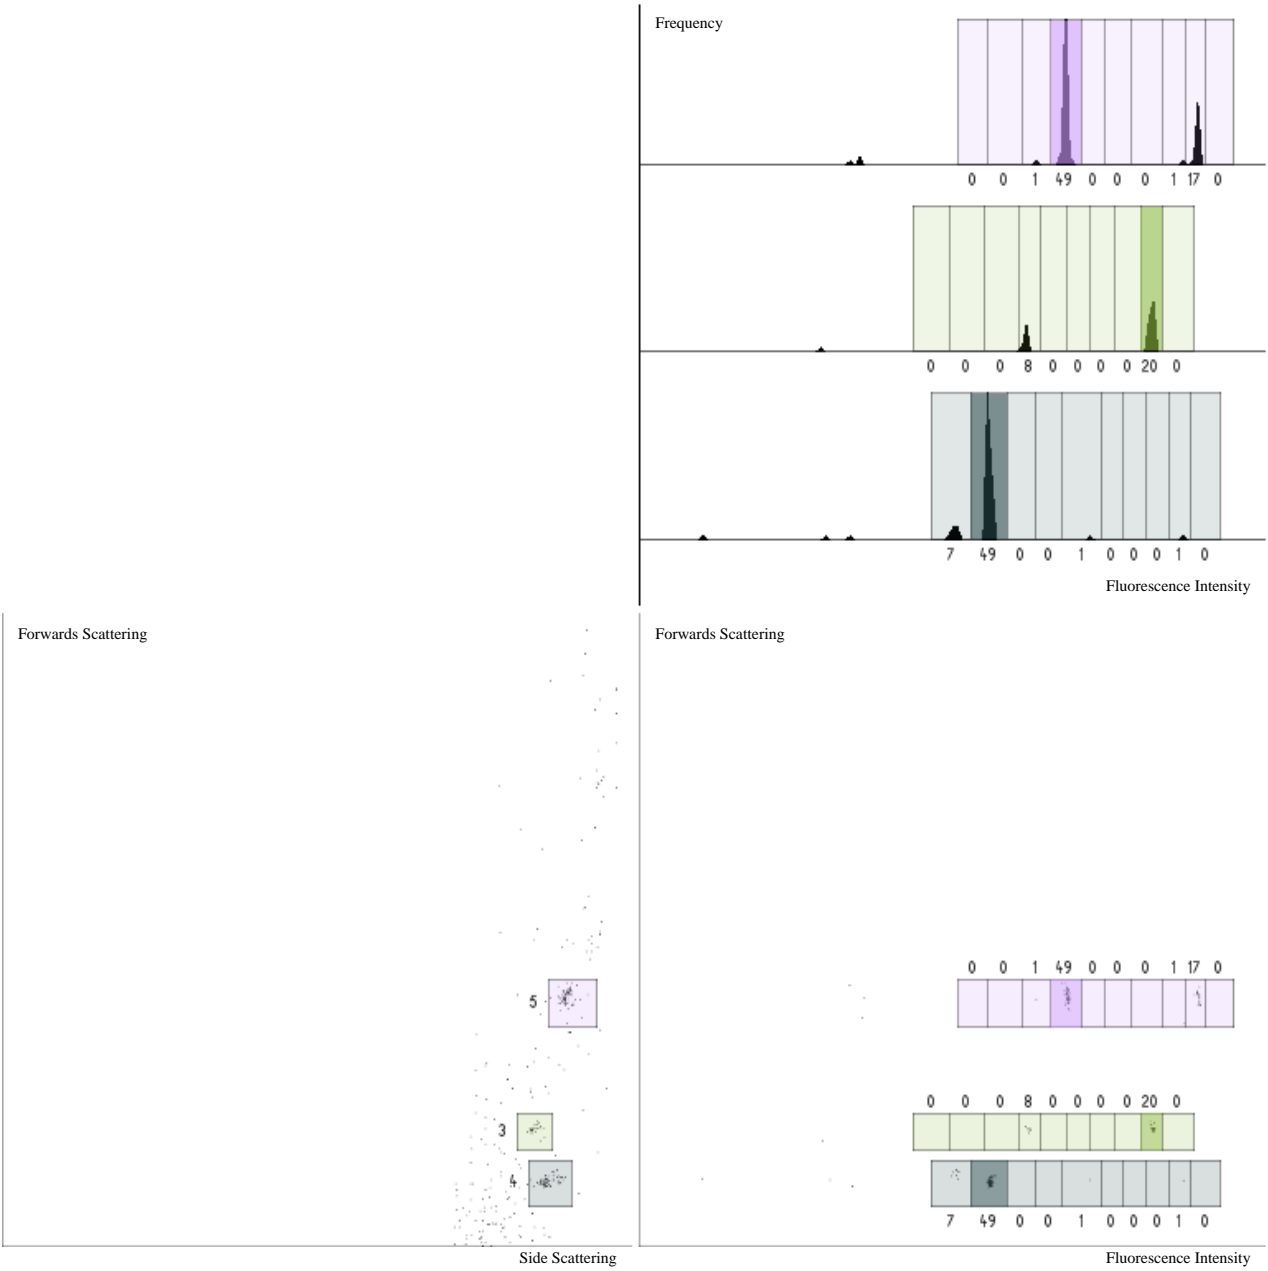

ANNEX 3: TAG DECONVOLUTION - BEAD 128

Passes flow sorting criteria: Yes  
Passes tag deconvolution criteria: Yes  
Included in protocol analysis: Yes  
Protocol: 6, 8, 1, 1  
Filename: Bin1\_plateB1\_H4.fcs  
Split 1: Petrol shading  
Split 2: Green shading  
Split 3: Violet shading

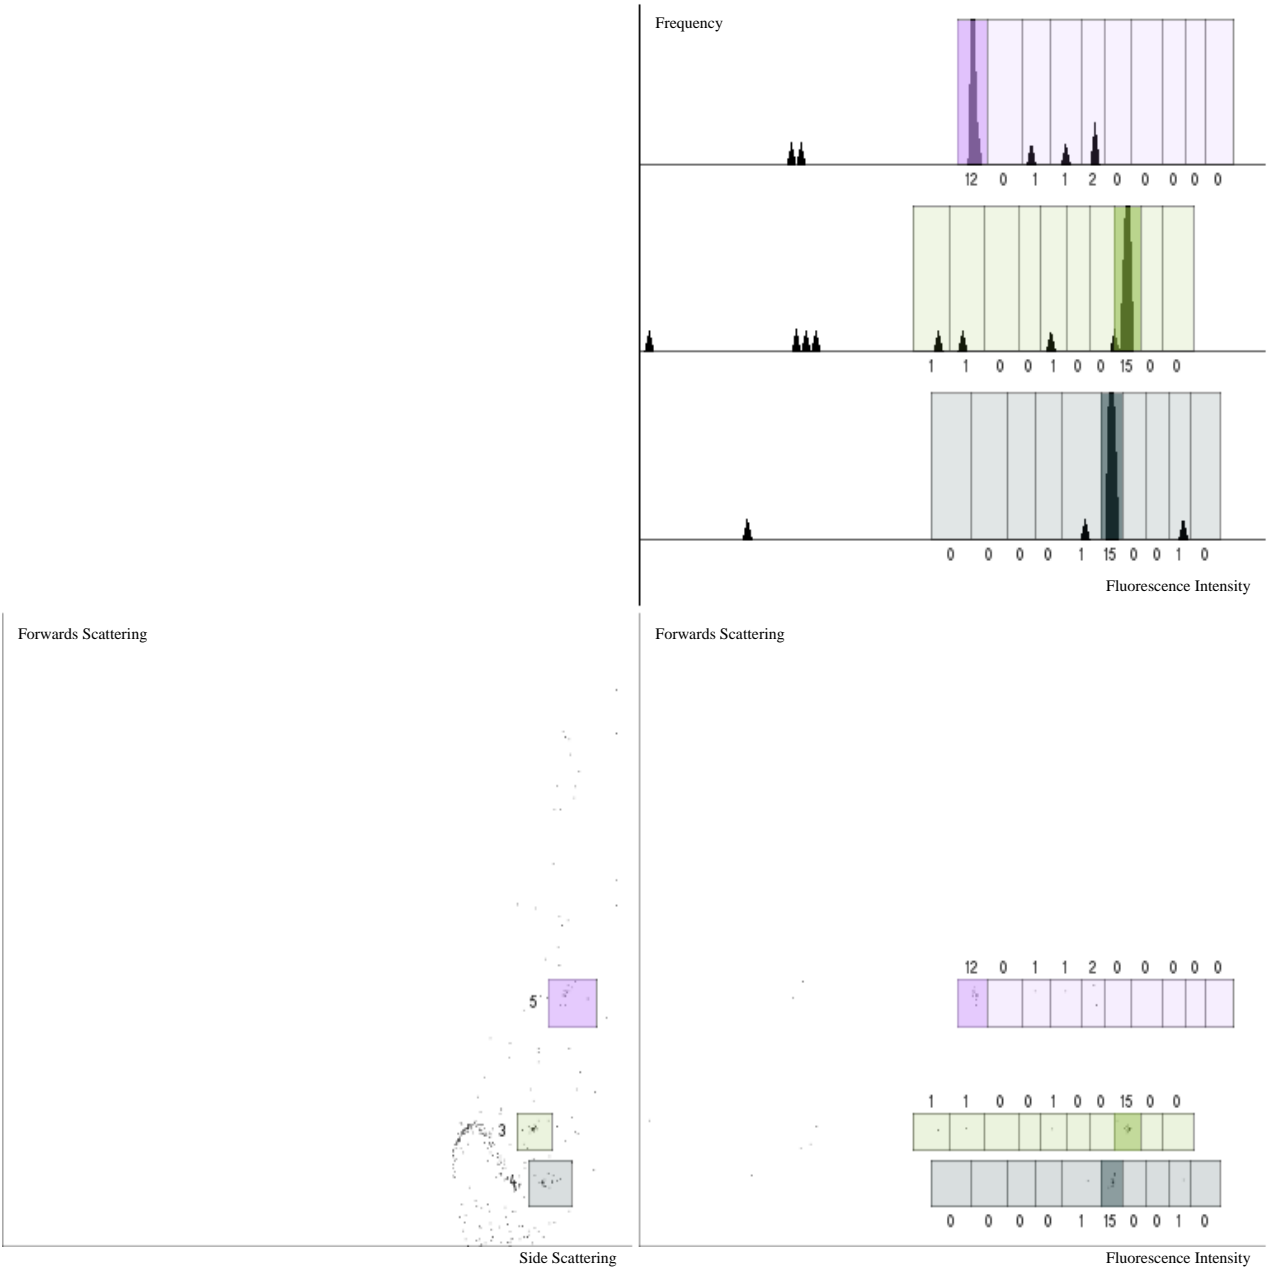

ANNEX 3: TAG DECONVOLUTION - BEAD 129

Passes flow sorting criteria: Yes  
Passes tag deconvolution criteria: Yes  
Included in protocol analysis: Yes  
Protocol: 2, 4, 3, 1  
Filename: Bin1\_plateB1\_H5.fcs  
Split 1: Petrol shading  
Split 2: Green shading  
Split 3: Violet shading

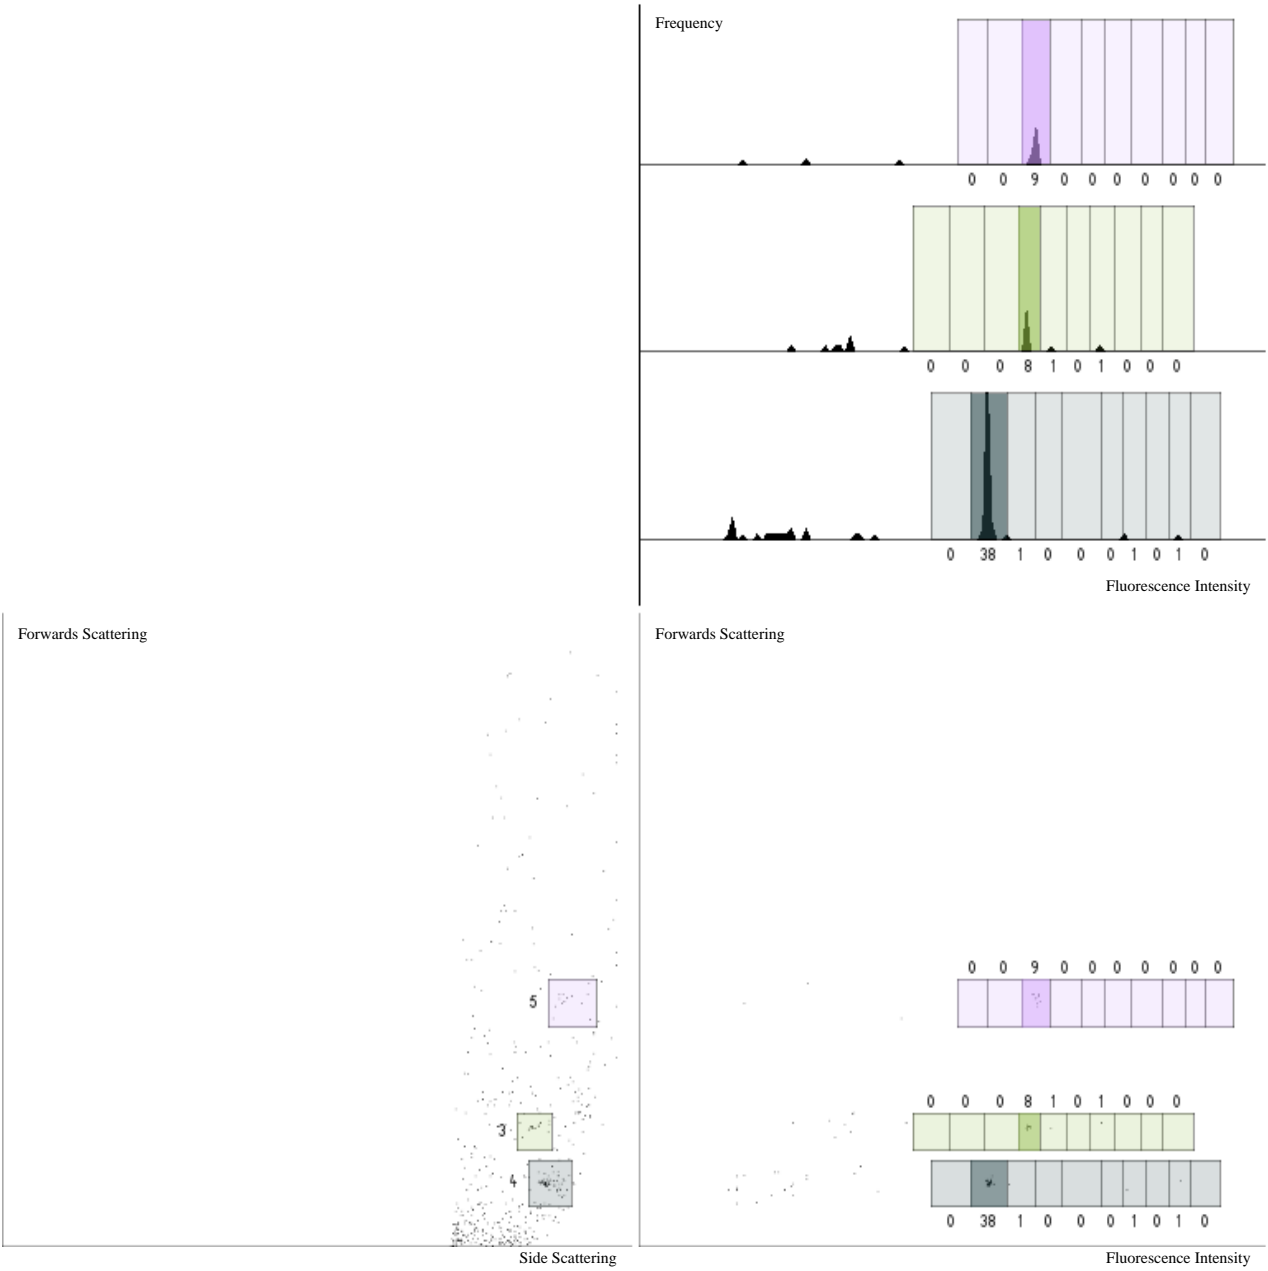

ANNEX 3: TAG DECONVOLUTION - BEAD 130

Passes flow sorting criteria: Yes  
Passes tag deconvolution criteria: Yes  
Included in protocol analysis: Yes  
Protocol: 6, 6, 10, 1  
Filename: Bin1\_plateB1\_H6.fcs  
Split 1: Petrol shading  
Split 2: Green shading  
Split 3: Violet shading

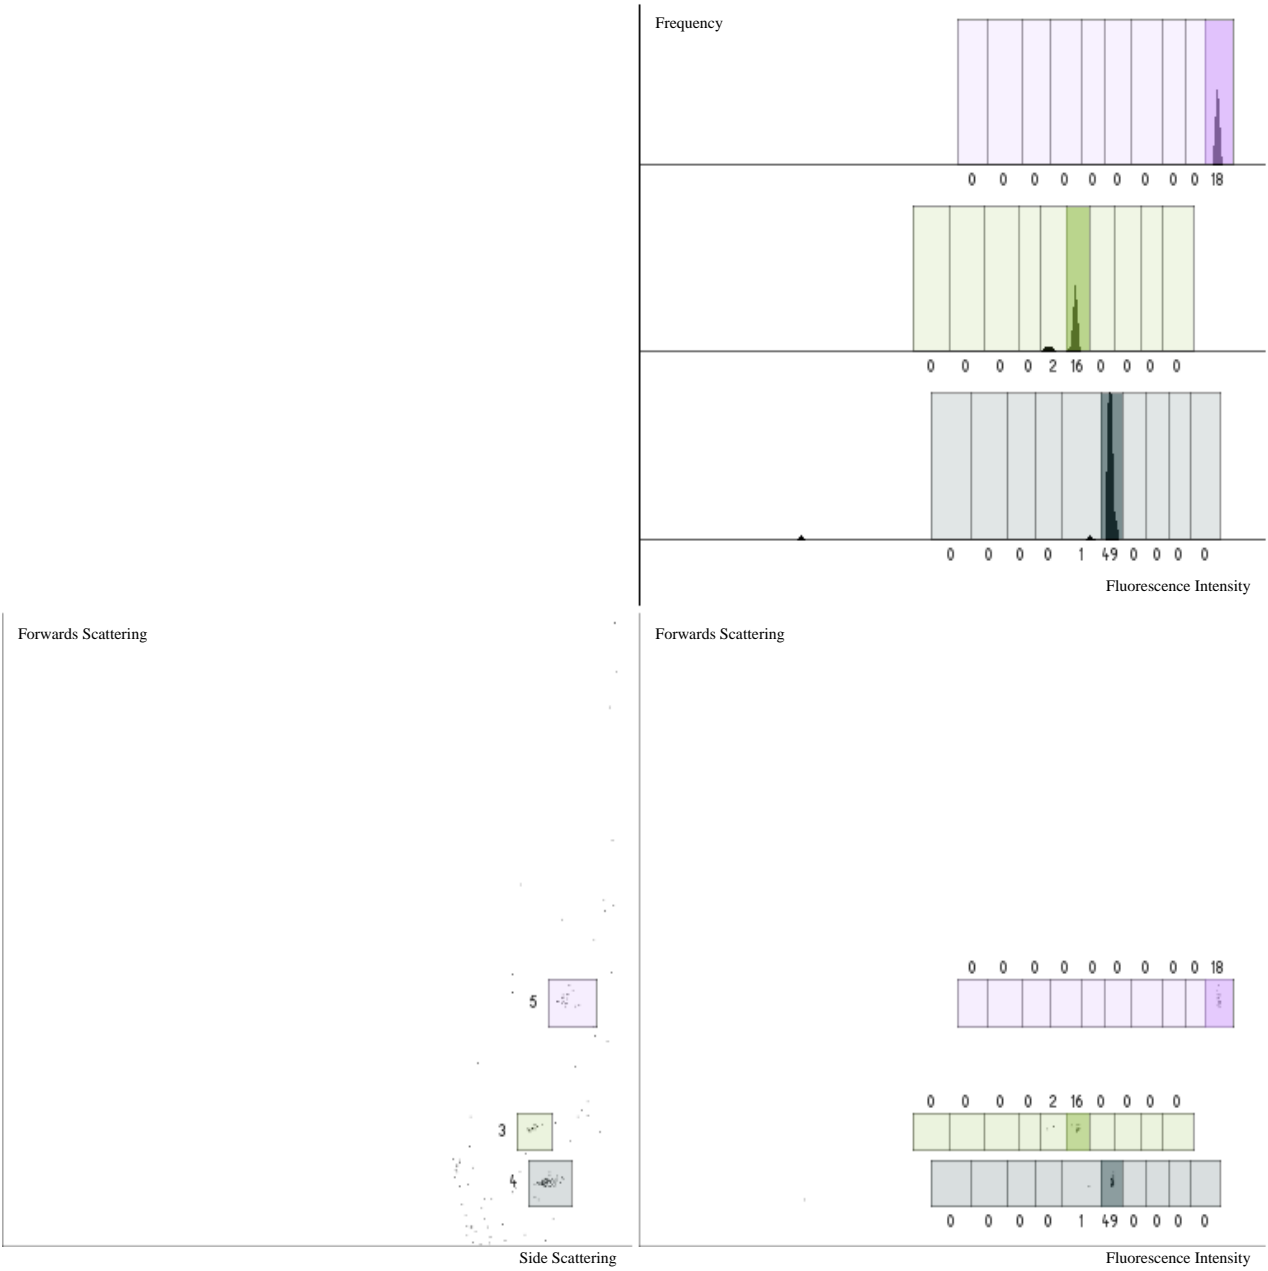

ANNEX 3: TAG DECONVOLUTION - BEAD 131

Passes flow sorting criteria: Yes  
Passes tag deconvolution criteria: No  
Included in protocol analysis: No  
Protocol: N/A  
Filename: Bin1\_plateB1\_H10.fcs  
Split 1: Petrol shading  
Split 2: Green shading  
Split 3: Violet shading

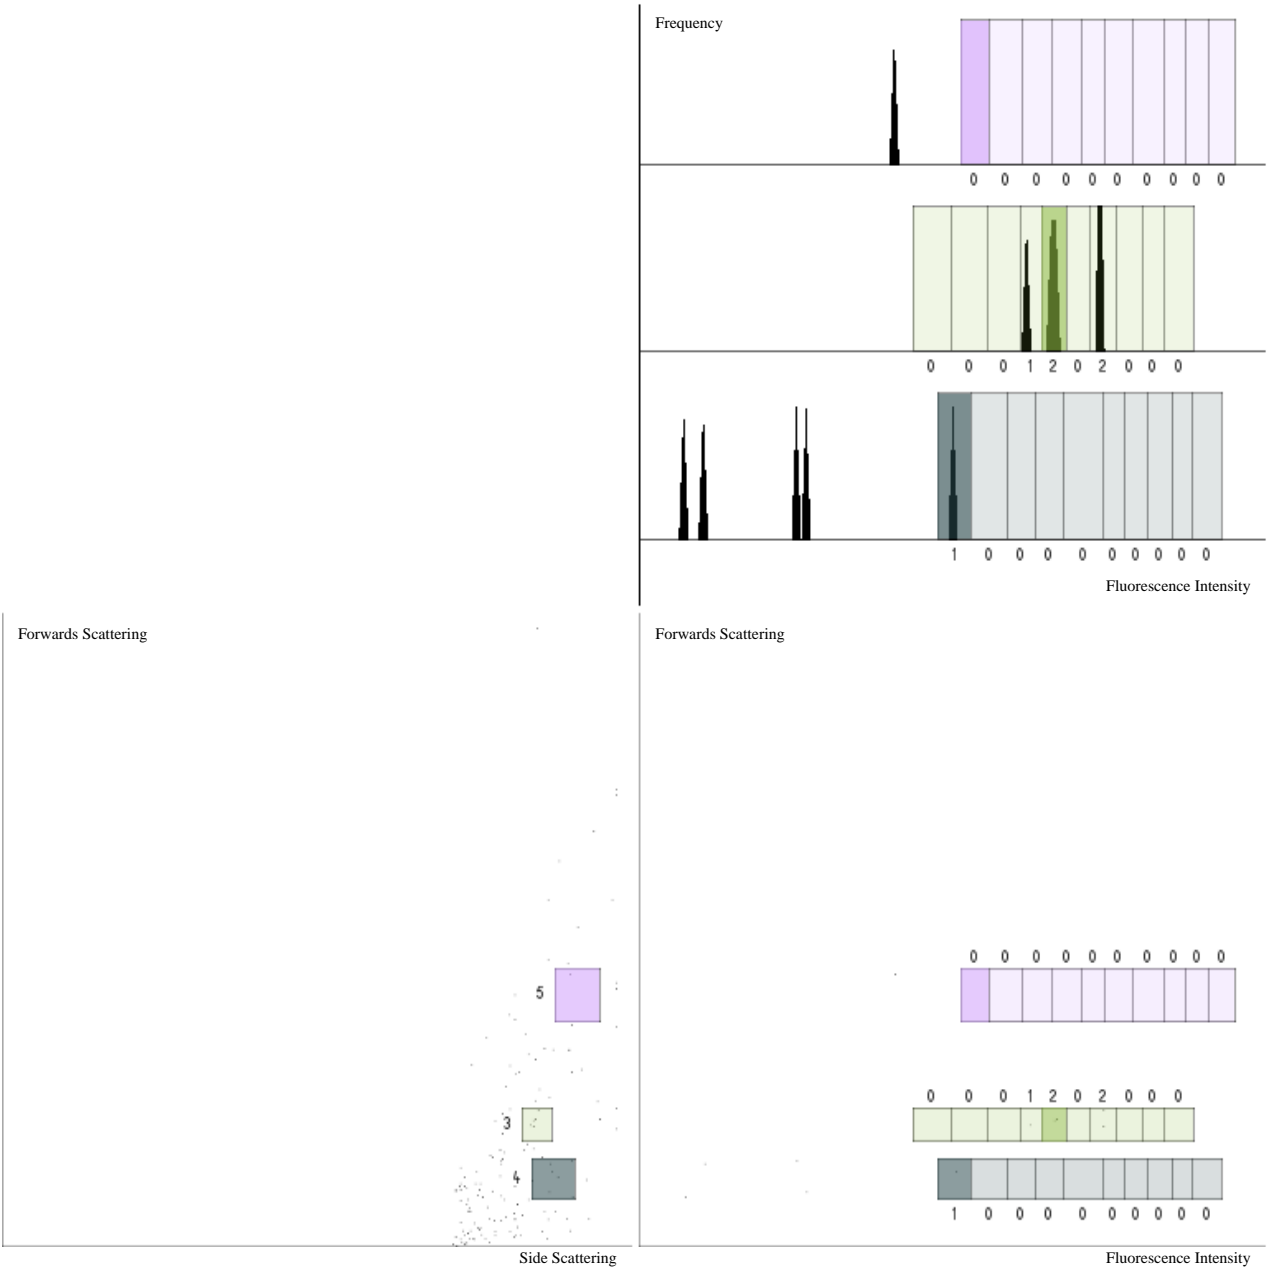

ANNEX 3: TAG DECONVOLUTION - BEAD 132

Passes flow sorting criteria: Yes  
Passes tag deconvolution criteria: Yes  
Included in protocol analysis: Yes  
Protocol: 2, 7, 4, 1  
Filename: Bin1\_plateB1\_A10.fcs  
Split 1: Petrol shading  
Split 2: Green shading  
Split 3: Violet shading

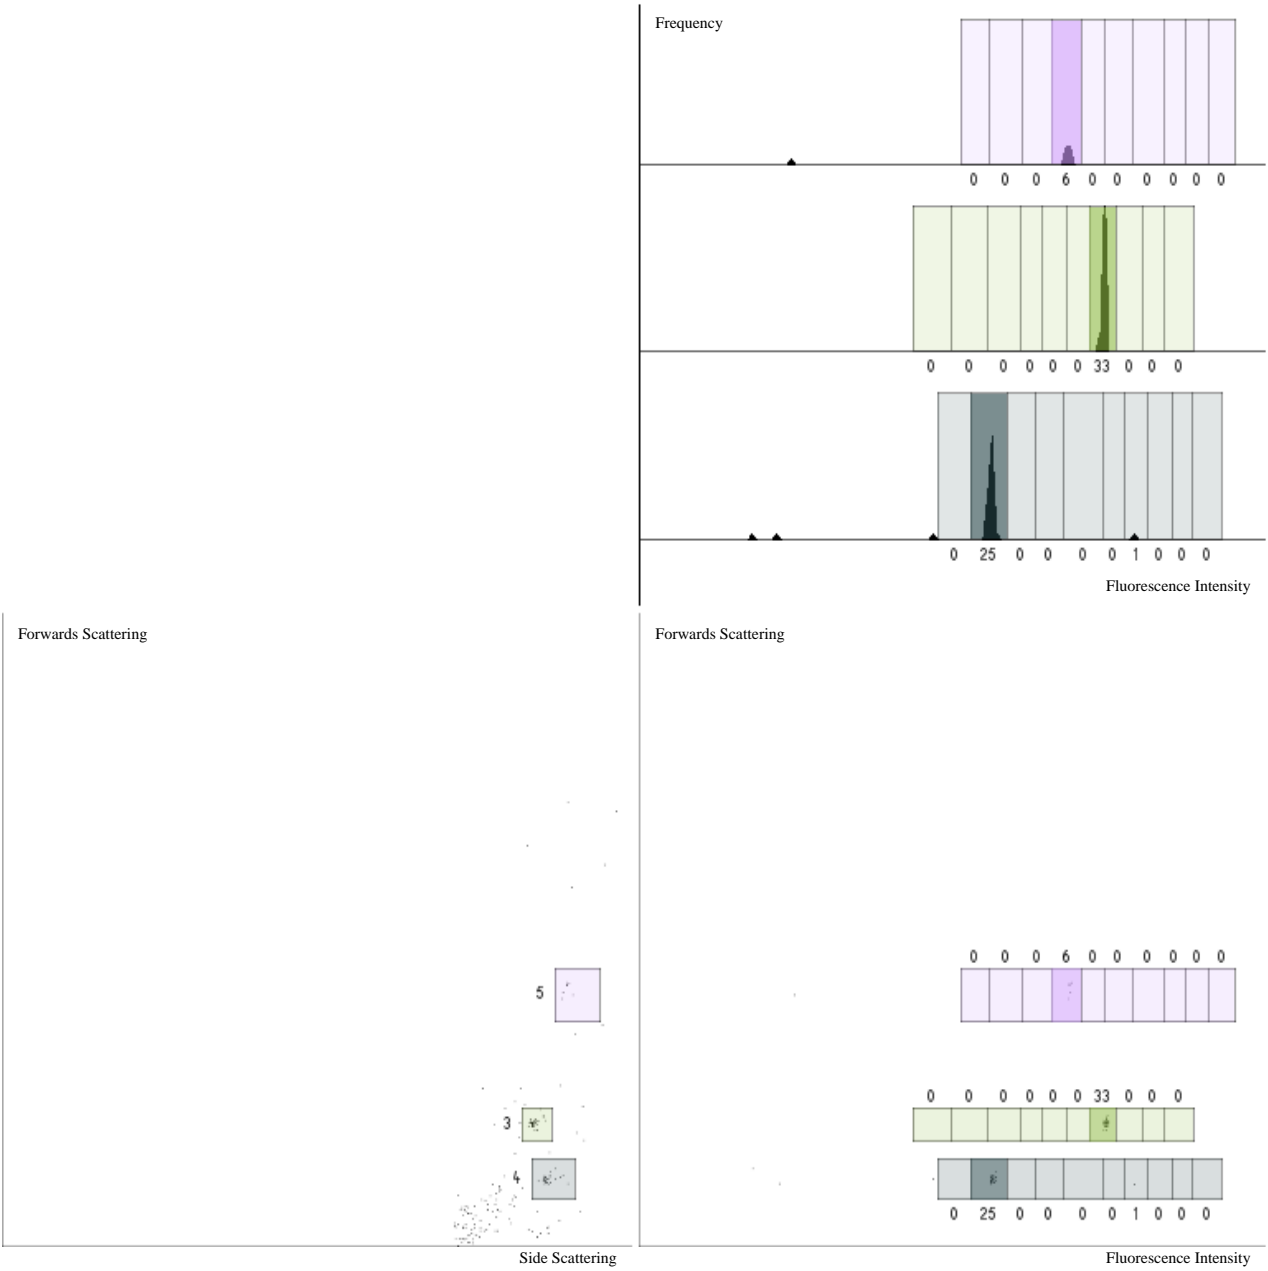

ANNEX 3: TAG DECONVOLUTION - BEAD 133

Passes flow sorting criteria: Yes  
Passes tag deconvolution criteria: No  
Included in protocol analysis: No  
Protocol: N/A  
Filename: Bin1\_plateB1\_B8.fcs  
Split 1: Petrol shading  
Split 2: Green shading  
Split 3: Violet shading

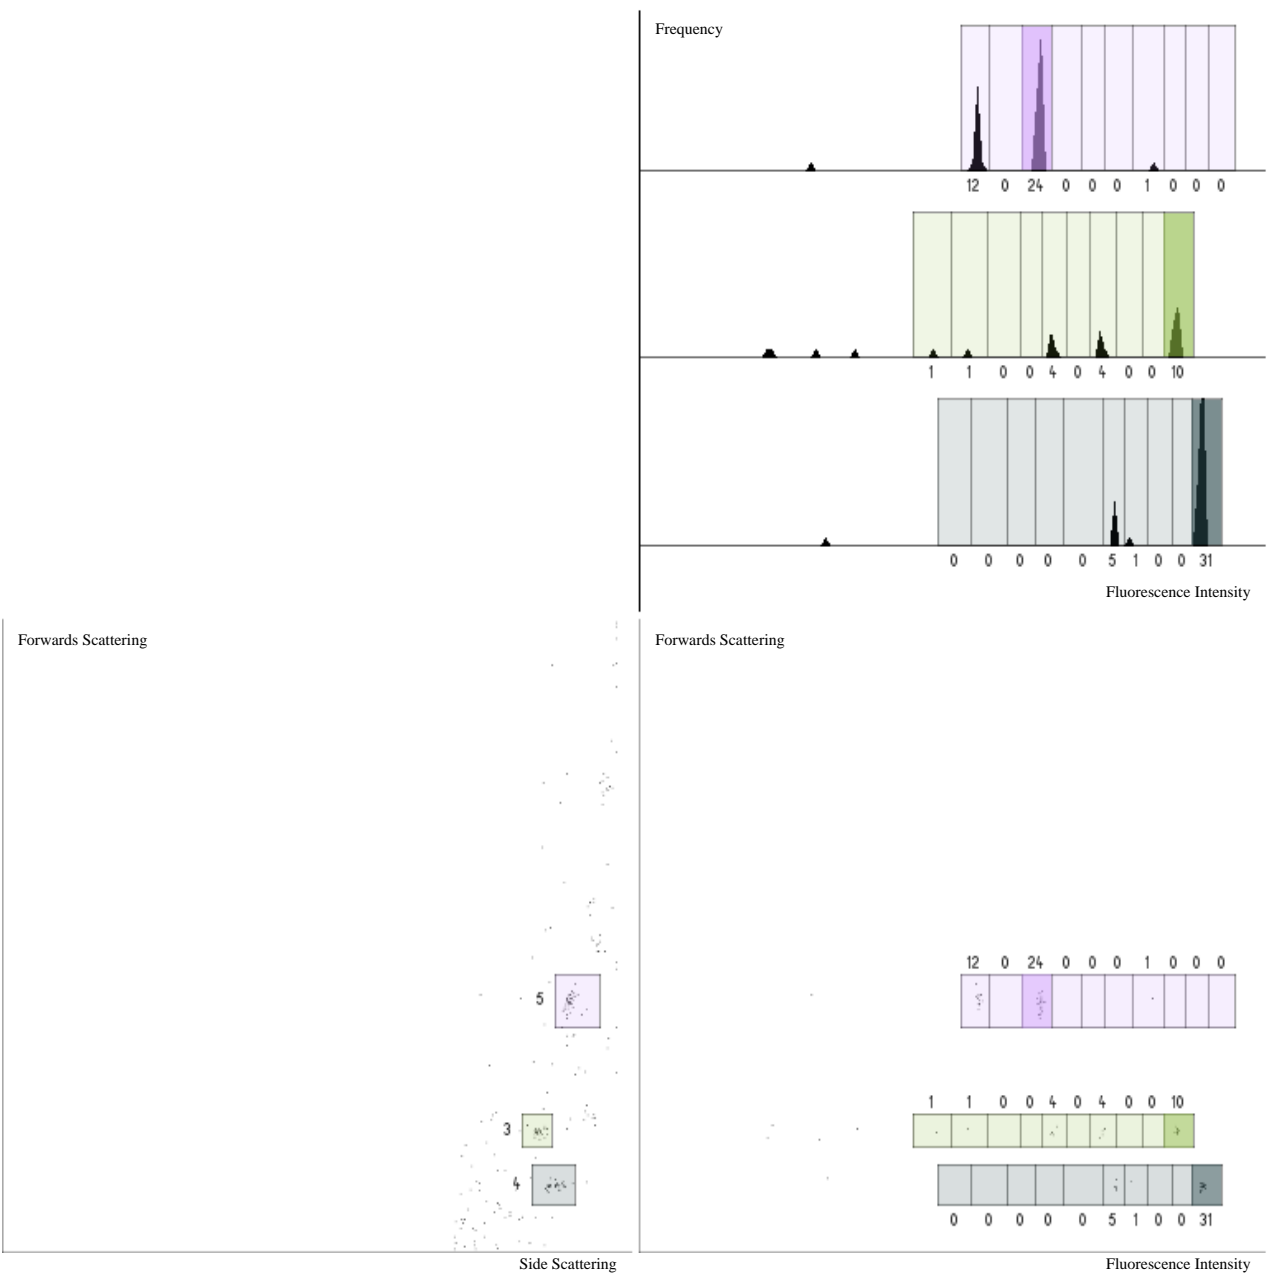

ANNEX 3: TAG DECONVOLUTION - BEAD 134

Passes flow sorting criteria: Yes  
Passes tag deconvolution criteria: Yes  
Included in protocol analysis: Yes  
Protocol: 6, 8, 1, 1  
Filename: Bin1\_plateB1\_B10.fcs  
Split 1: Petrol shading  
Split 2: Green shading  
Split 3: Violet shading

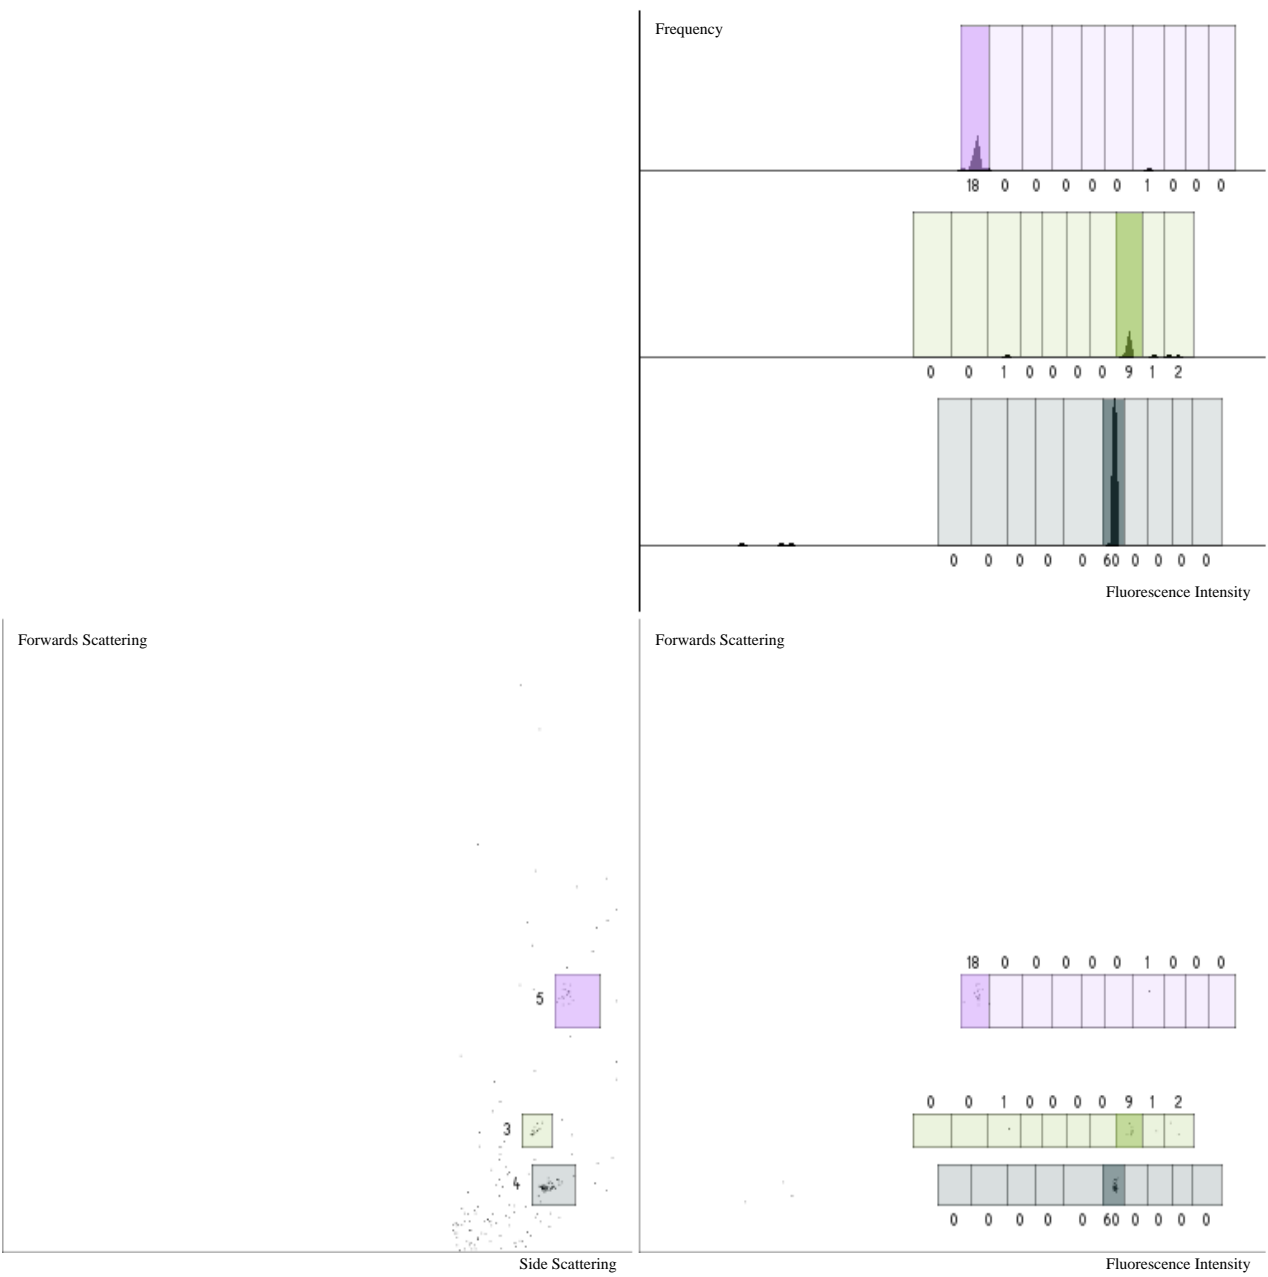



ANNEX 3: TAG DECONVOLUTION - BEAD 135

Passes flow sorting criteria: Yes  
Passes tag deconvolution criteria: Yes  
Included in protocol analysis: Yes  
Protocol: 5, 9, 5, 1  
Filename: Bin1\_plateB1\_C8.fcs  
Split 1: Petrol shading  
Split 2: Green shading  
Split 3: Violet shading

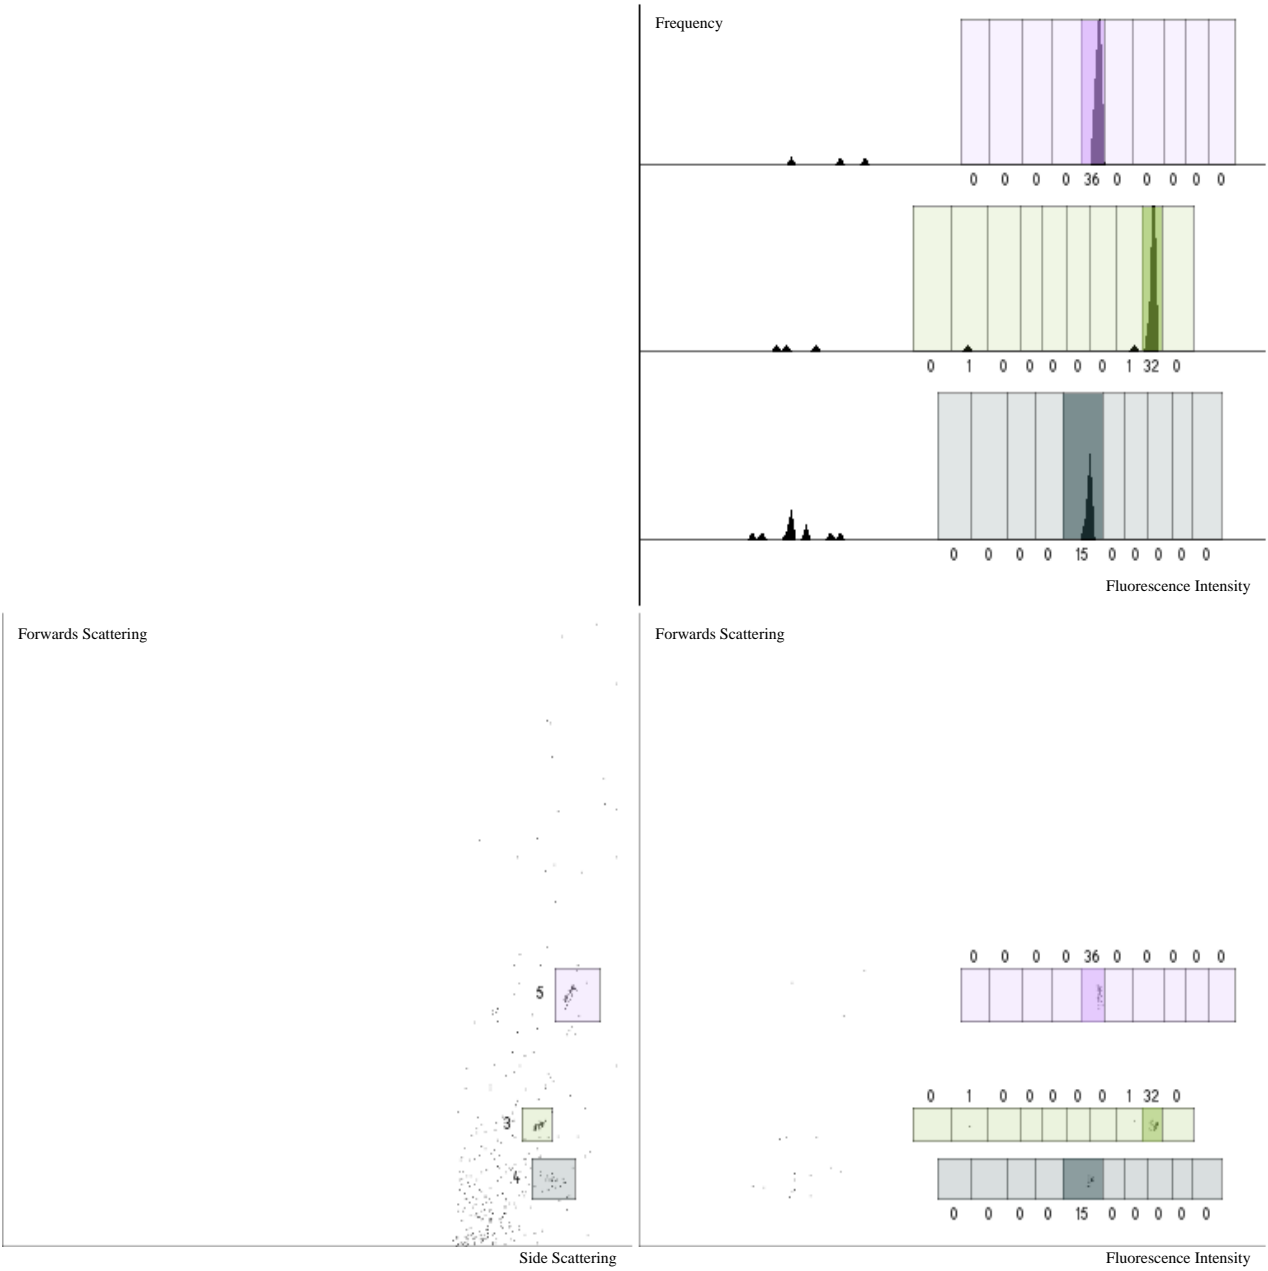

ANNEX 3: TAG DECONVOLUTION - BEAD 136

Passes flow sorting criteria: Yes  
Passes tag deconvolution criteria: Yes  
Included in protocol analysis: Yes  
Protocol: 1, 6, 7, 1  
Filename: Bin1\_plateB1\_C9.fcs  
Split 1: Petrol shading  
Split 2: Green shading  
Split 3: Violet shading

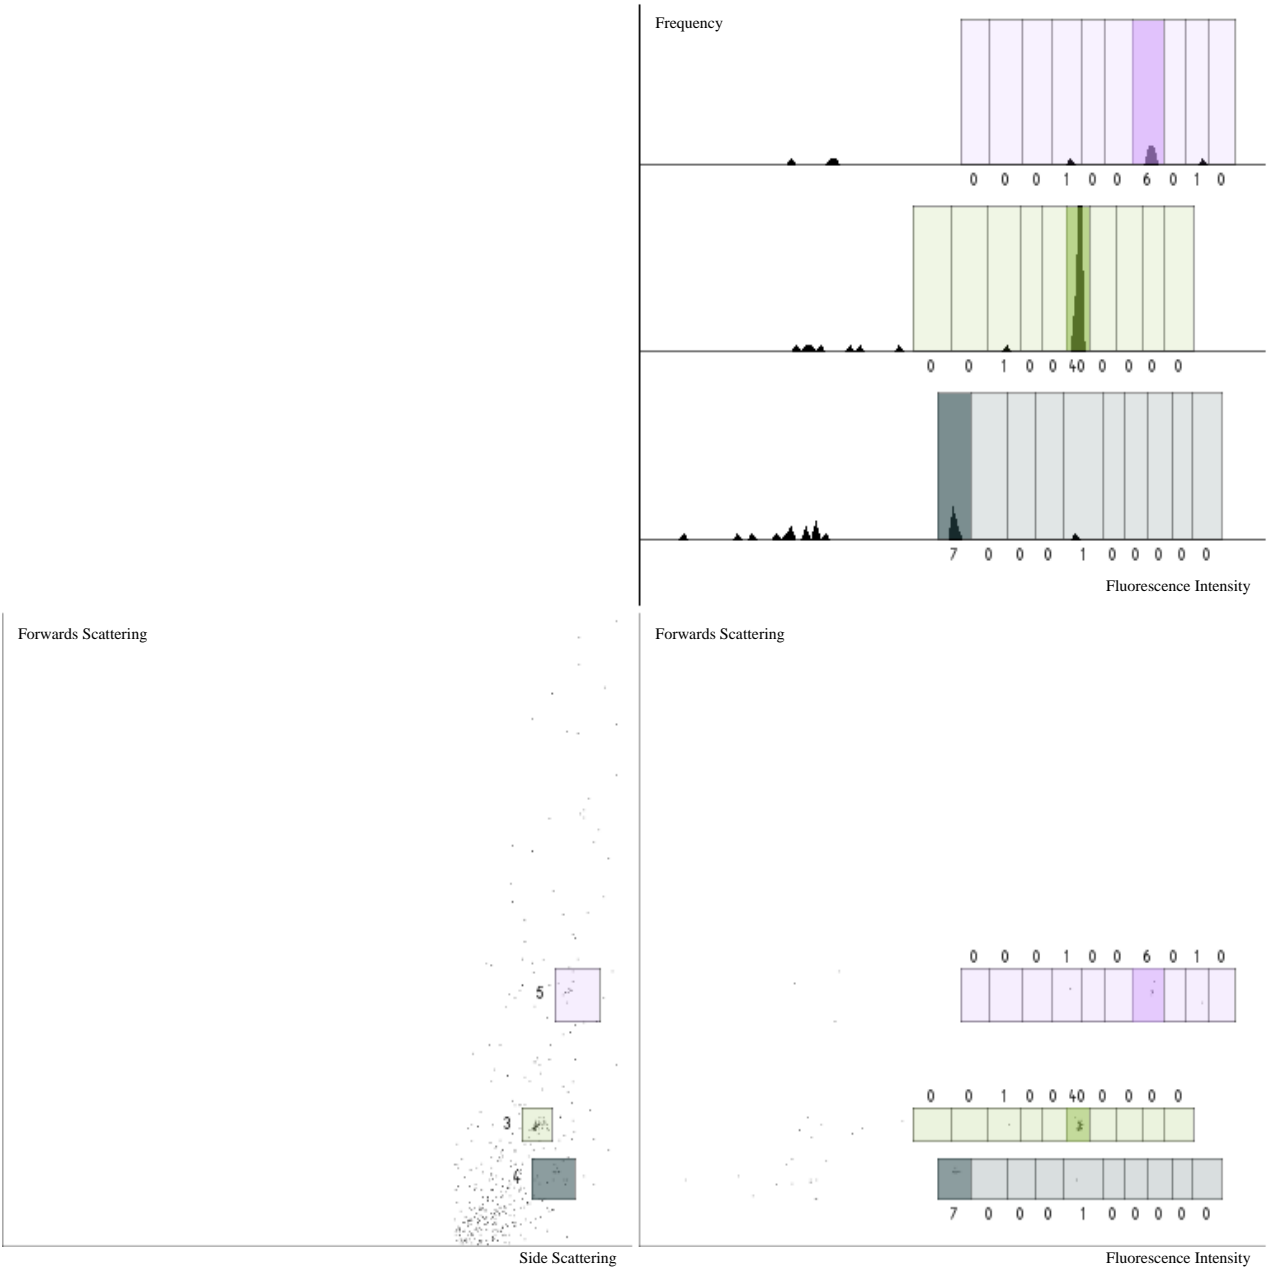

ANNEX 3: TAG DECONVOLUTION - BEAD 137

Passes flow sorting criteria: Yes  
Passes tag deconvolution criteria: No  
Included in protocol analysis: No  
Protocol: N/A  
Filename: Bin1\_plateB1\_D8.fcs  
Split 1: Petrol shading  
Split 2: Green shading  
Split 3: Violet shading

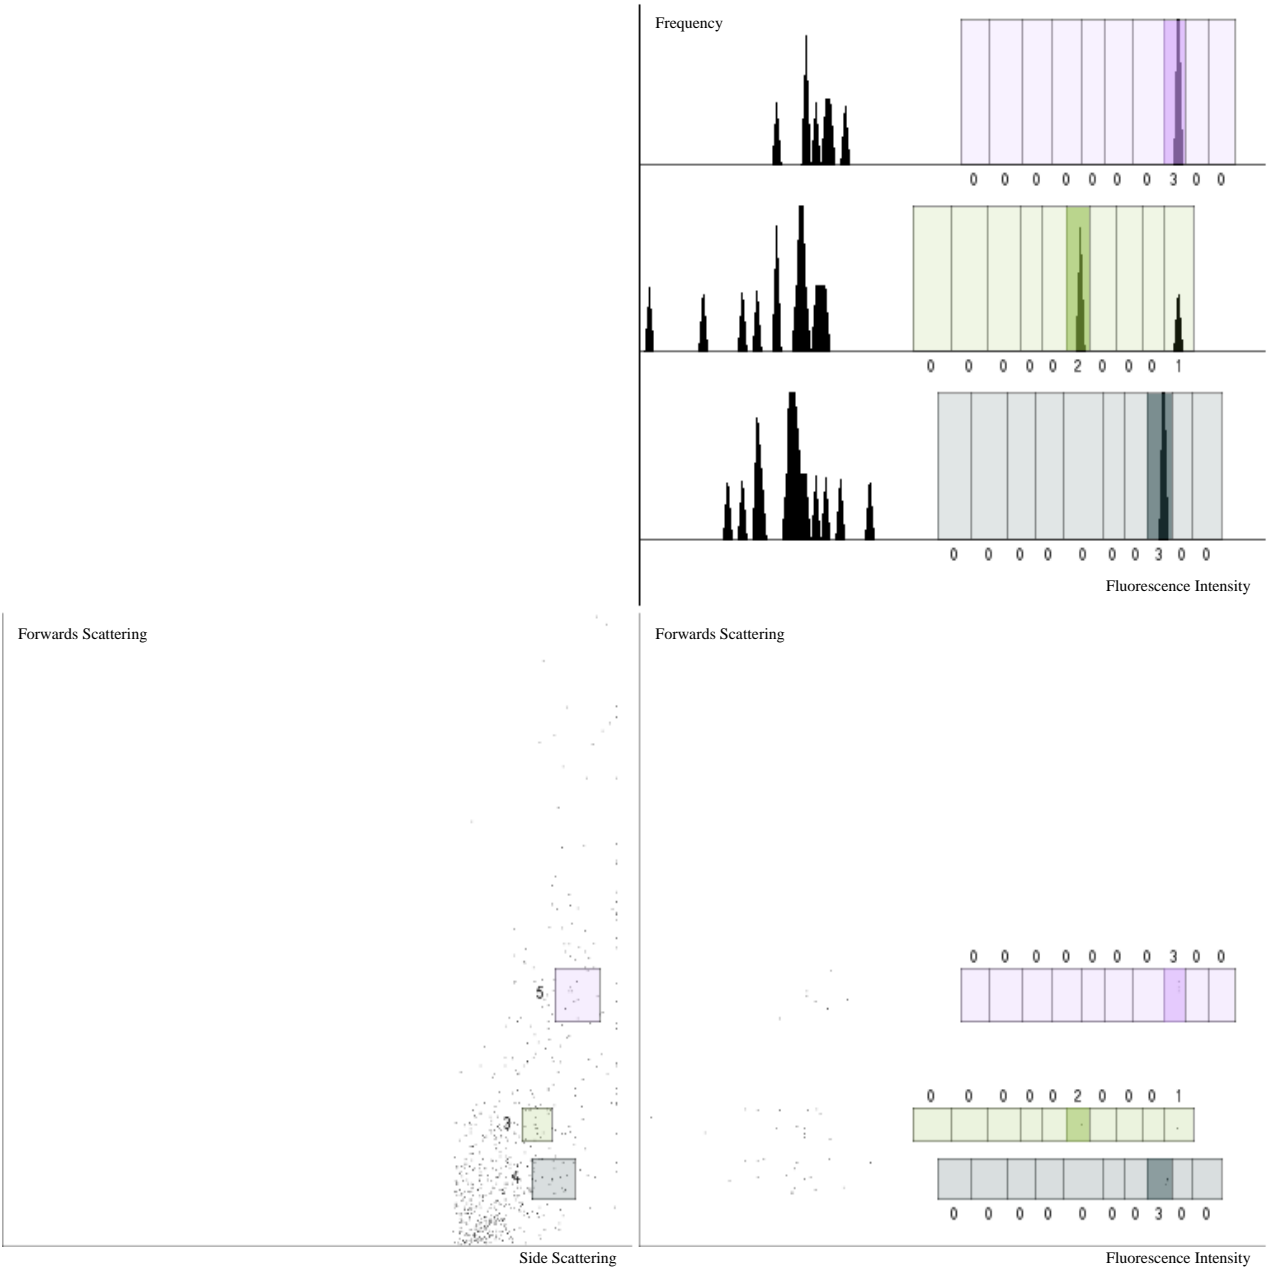

ANNEX 3: TAG DECONVOLUTION - BEAD 138

Passes flow sorting criteria: Yes  
Passes tag deconvolution criteria: No  
Included in protocol analysis: No  
Protocol: N/A  
Filename: Bin1\_plateB1\_D9.fcs  
Split 1: Petrol shading  
Split 2: Green shading  
Split 3: Violet shading

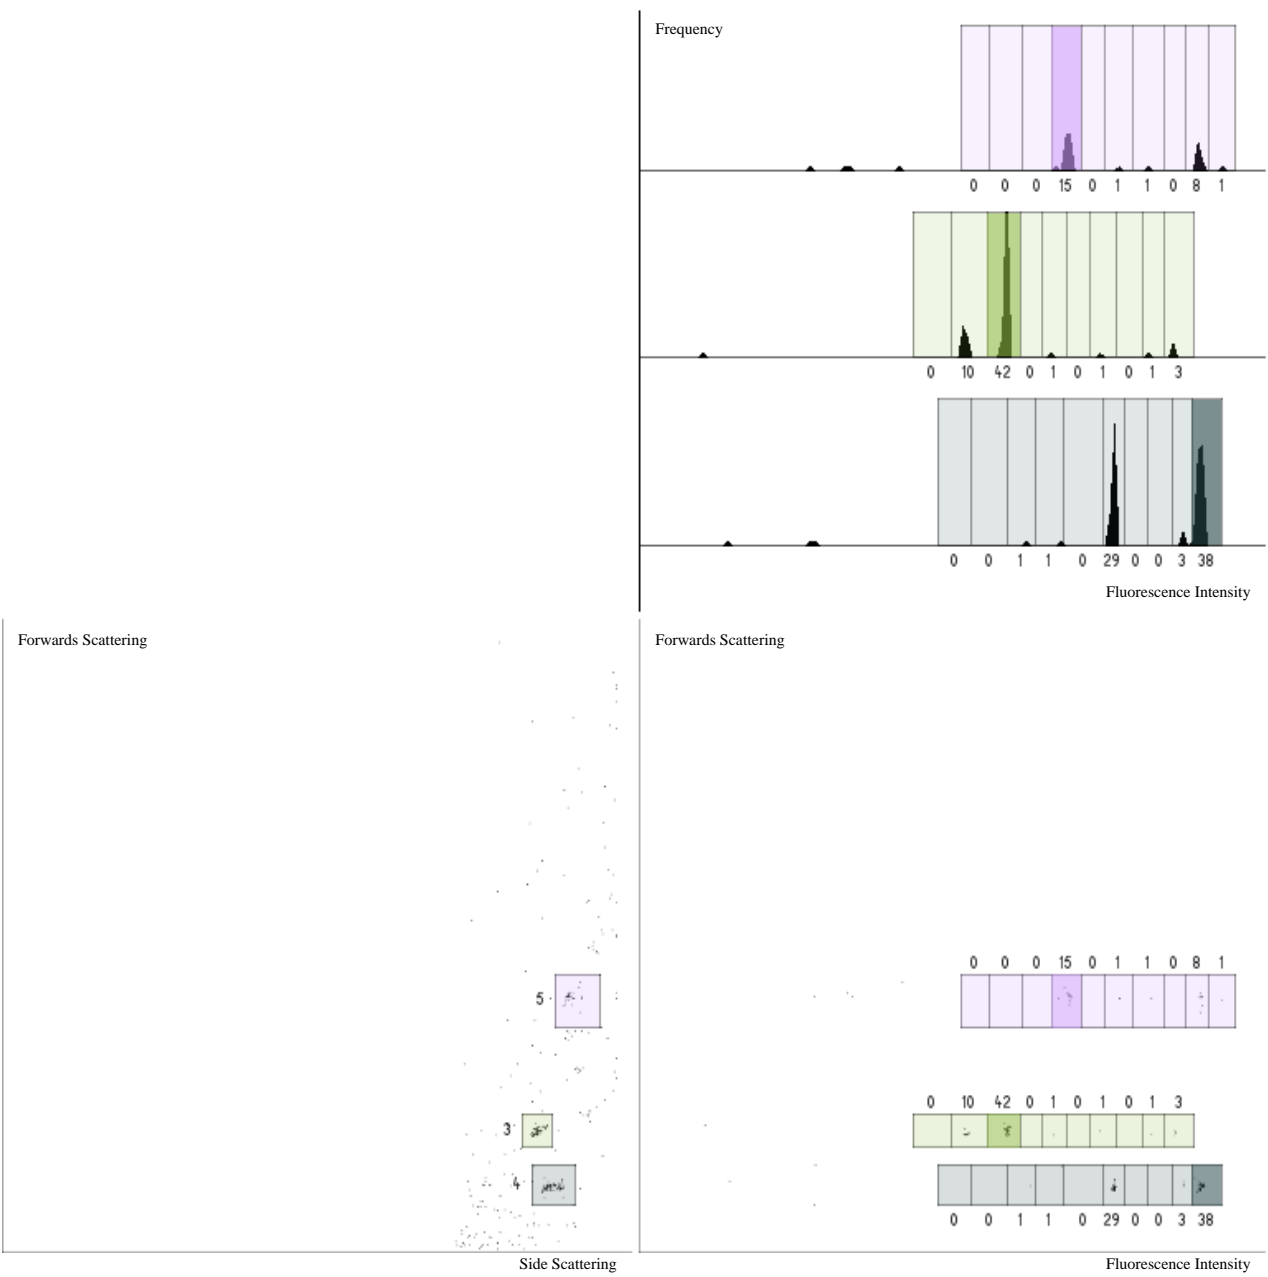

ANNEX 3: TAG DECONVOLUTION - BEAD 139

Passes flow sorting criteria: Yes  
Passes tag deconvolution criteria: Yes  
Included in protocol analysis: Yes  
Protocol: 4, 6, 7, 1  
Filename: Bin1\_plateB1\_D10.fcs  
Split 1: Petrol shading  
Split 2: Green shading  
Split 3: Violet shading

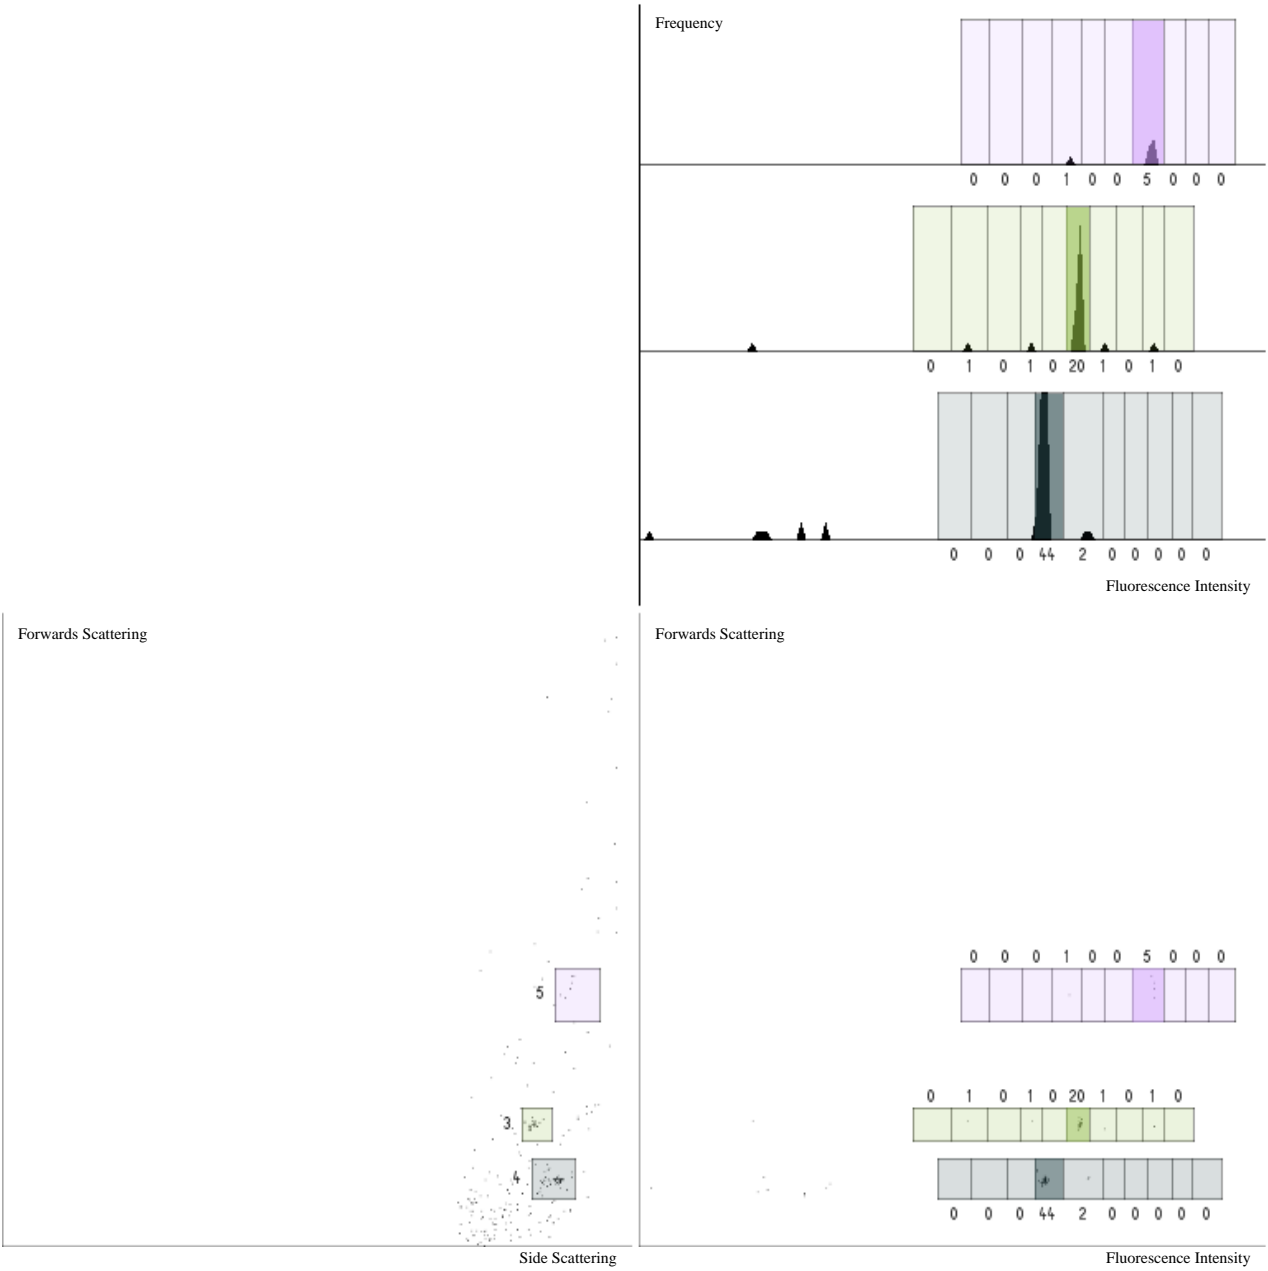

ANNEX 3: TAG DECONVOLUTION - BEAD 140

Passes flow sorting criteria: Yes  
Passes tag deconvolution criteria: Yes  
Included in protocol analysis: Yes  
Protocol: 5, 1, 10, 1  
Filename: Bin1\_plateB1\_E8.fcs  
Split 1: Petrol shading  
Split 2: Green shading  
Split 3: Violet shading

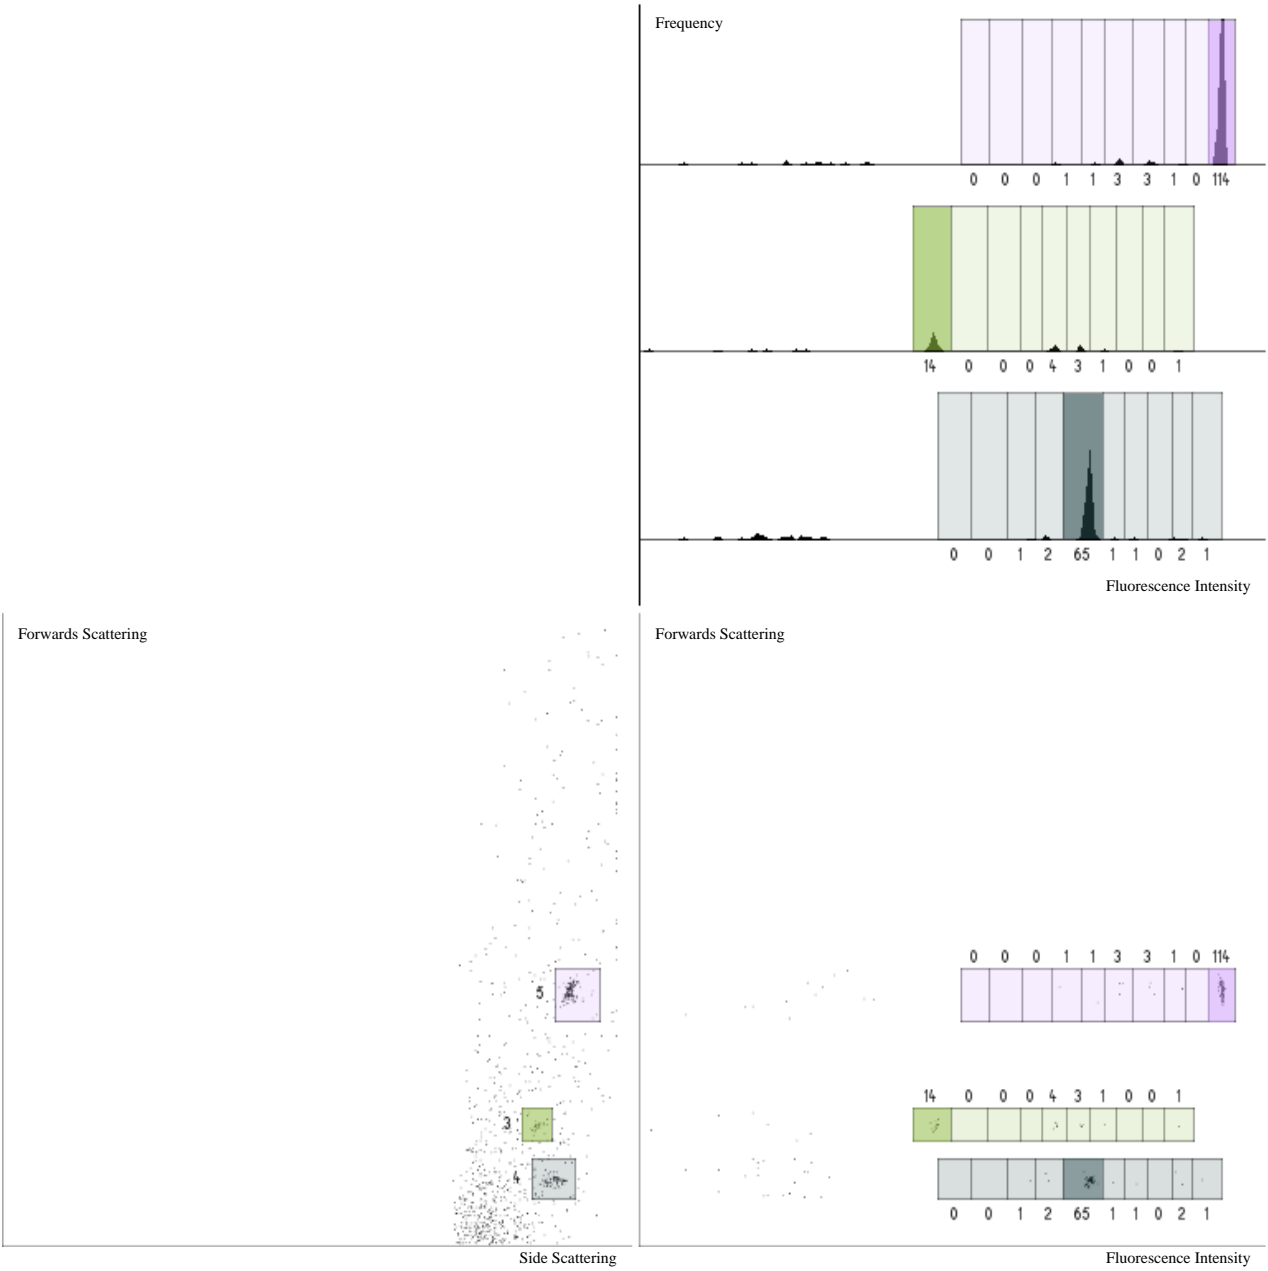

ANNEX 3: TAG DECONVOLUTION - BEAD 141

Passes flow sorting criteria: Yes  
Passes tag deconvolution criteria: Yes  
Included in protocol analysis: Yes  
Protocol: 5, 10, 6, 1  
Filename: Bin1\_plateB1\_E9.fcs  
Split 1: Petrol shading  
Split 2: Green shading  
Split 3: Violet shading

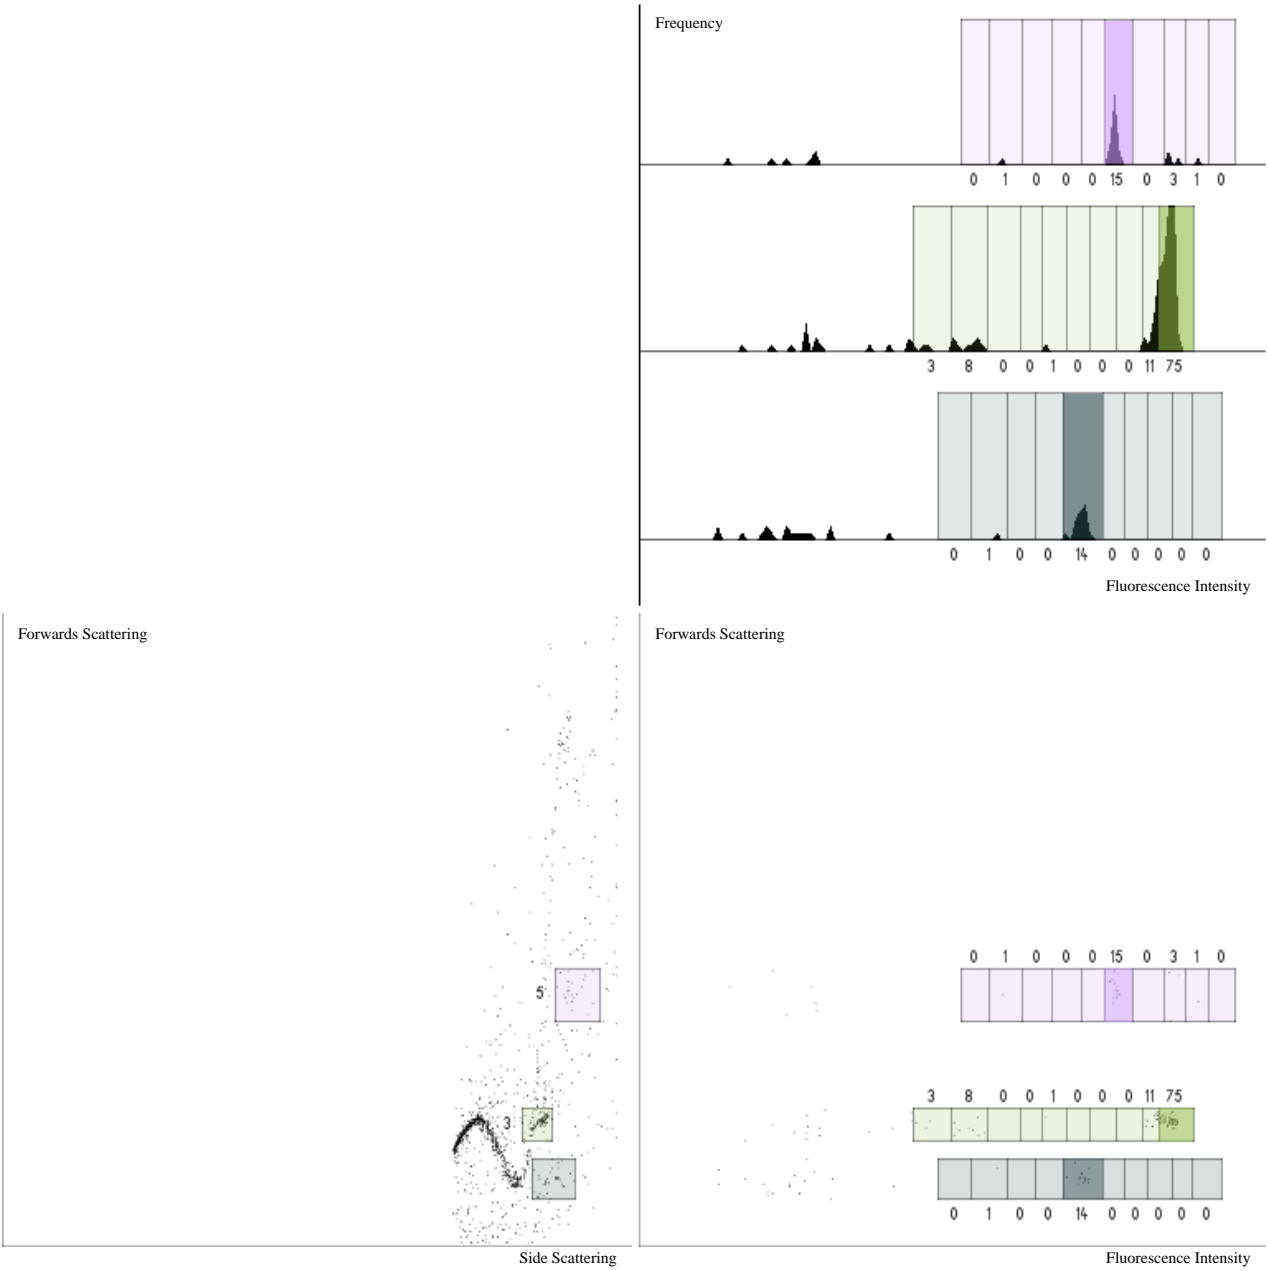

ANNEX 3: TAG DECONVOLUTION - BEAD 142

Passes flow sorting criteria: Yes  
Passes tag deconvolution criteria: No  
Included in protocol analysis: No  
Protocol: N/A  
Filename: Bin1\_plateB1\_E10.fcs  
Split 1: Petrol shading  
Split 2: Green shading  
Split 3: Violet shading

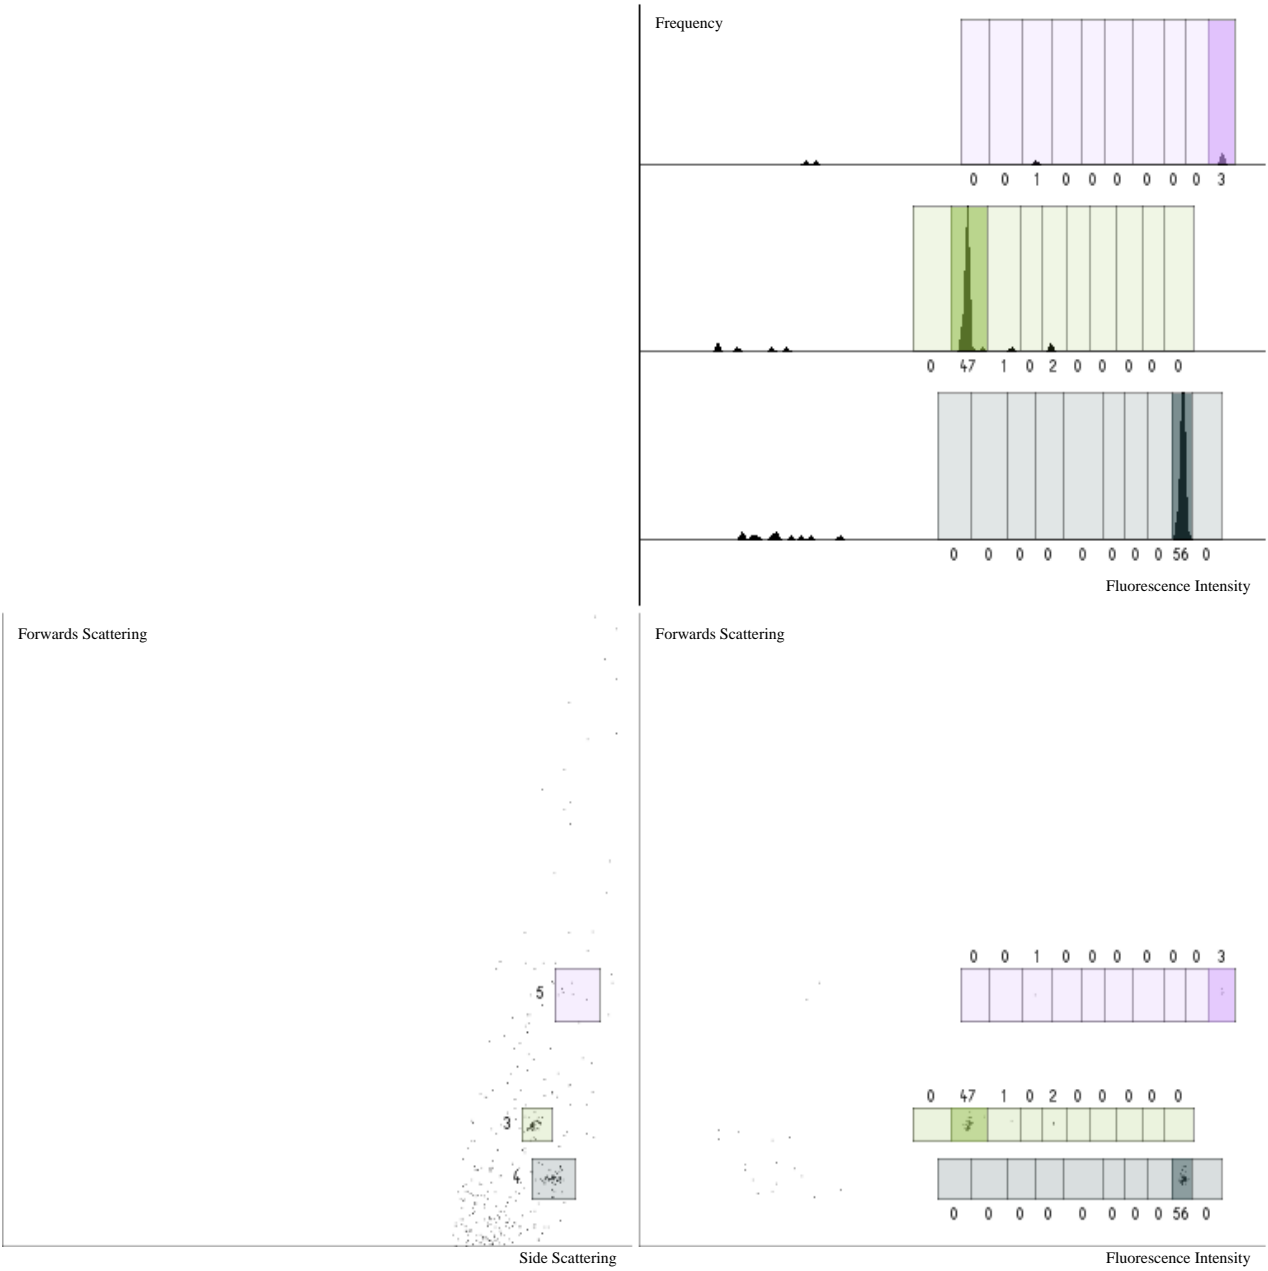



ANNEX 3: TAG DECONVOLUTION - BEAD 143

Passes flow sorting criteria: Yes  
Passes tag deconvolution criteria: No  
Included in protocol analysis: No  
Protocol: N/A  
Filename: Bin1\_plateB1\_F8.fcs  
Split 1: Petrol shading  
Split 2: Green shading  
Split 3: Violet shading

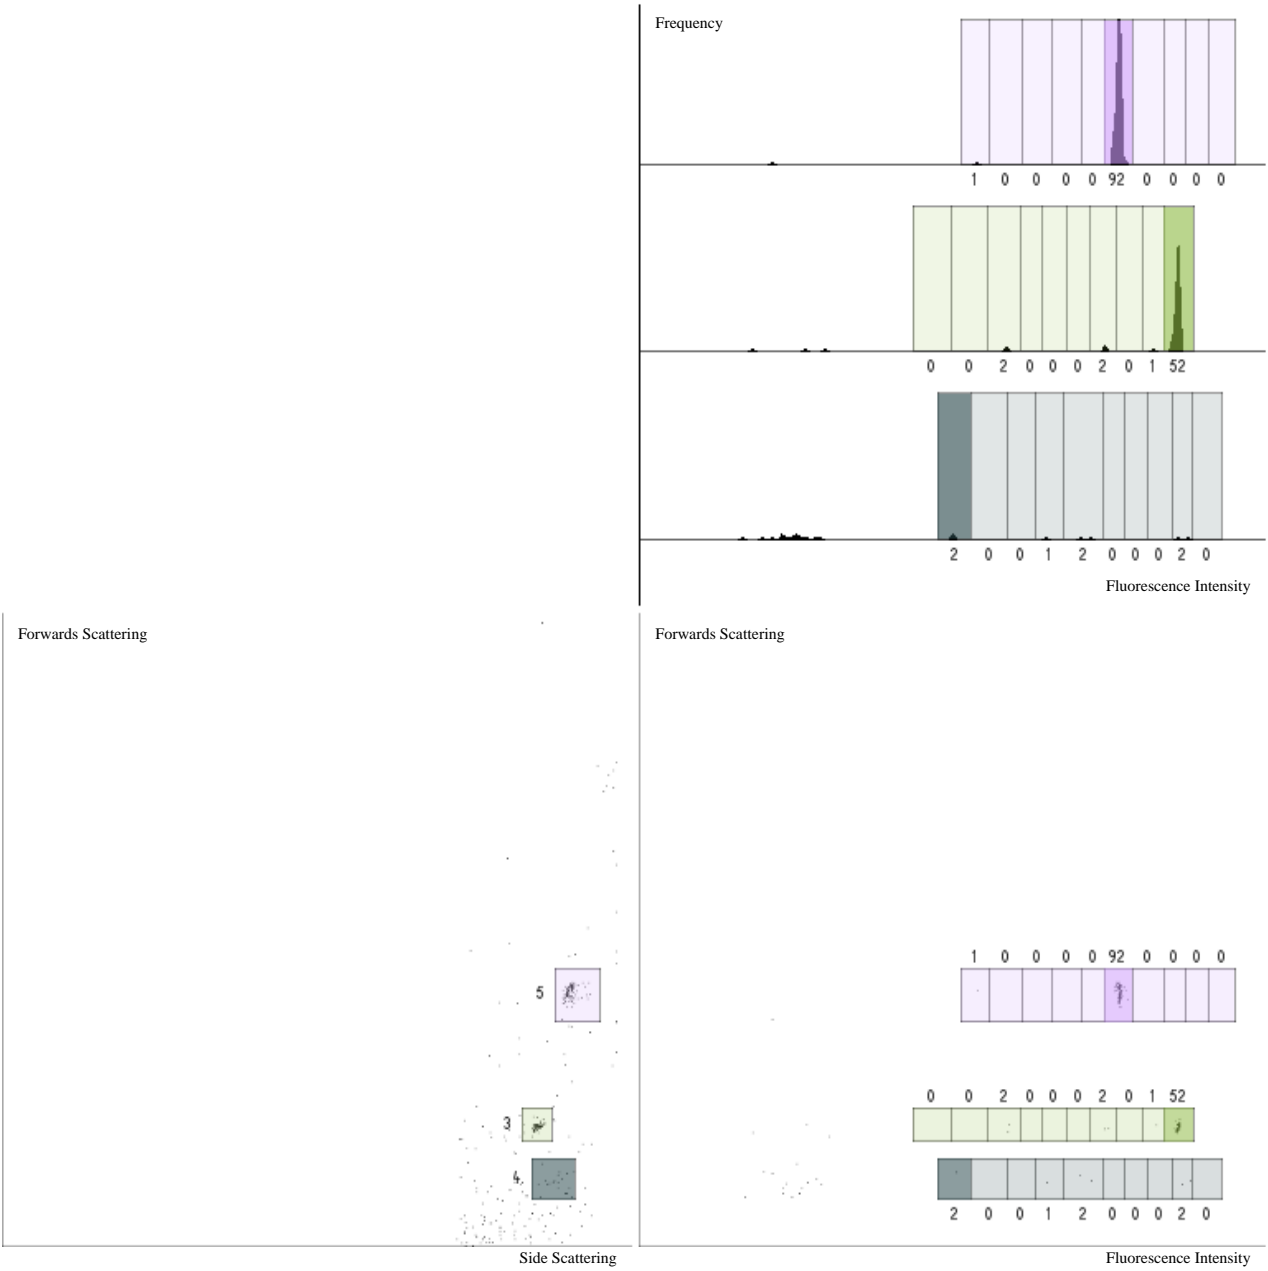

ANNEX 3: TAG DECONVOLUTION - BEAD 144

Passes flow sorting criteria: Yes  
Passes tag deconvolution criteria: No  
Included in protocol analysis: No  
Protocol: N/A  
Filename: Bin1\_plateB1\_F9.fcs  
Split 1: Petrol shading  
Split 2: Green shading  
Split 3: Violet shading

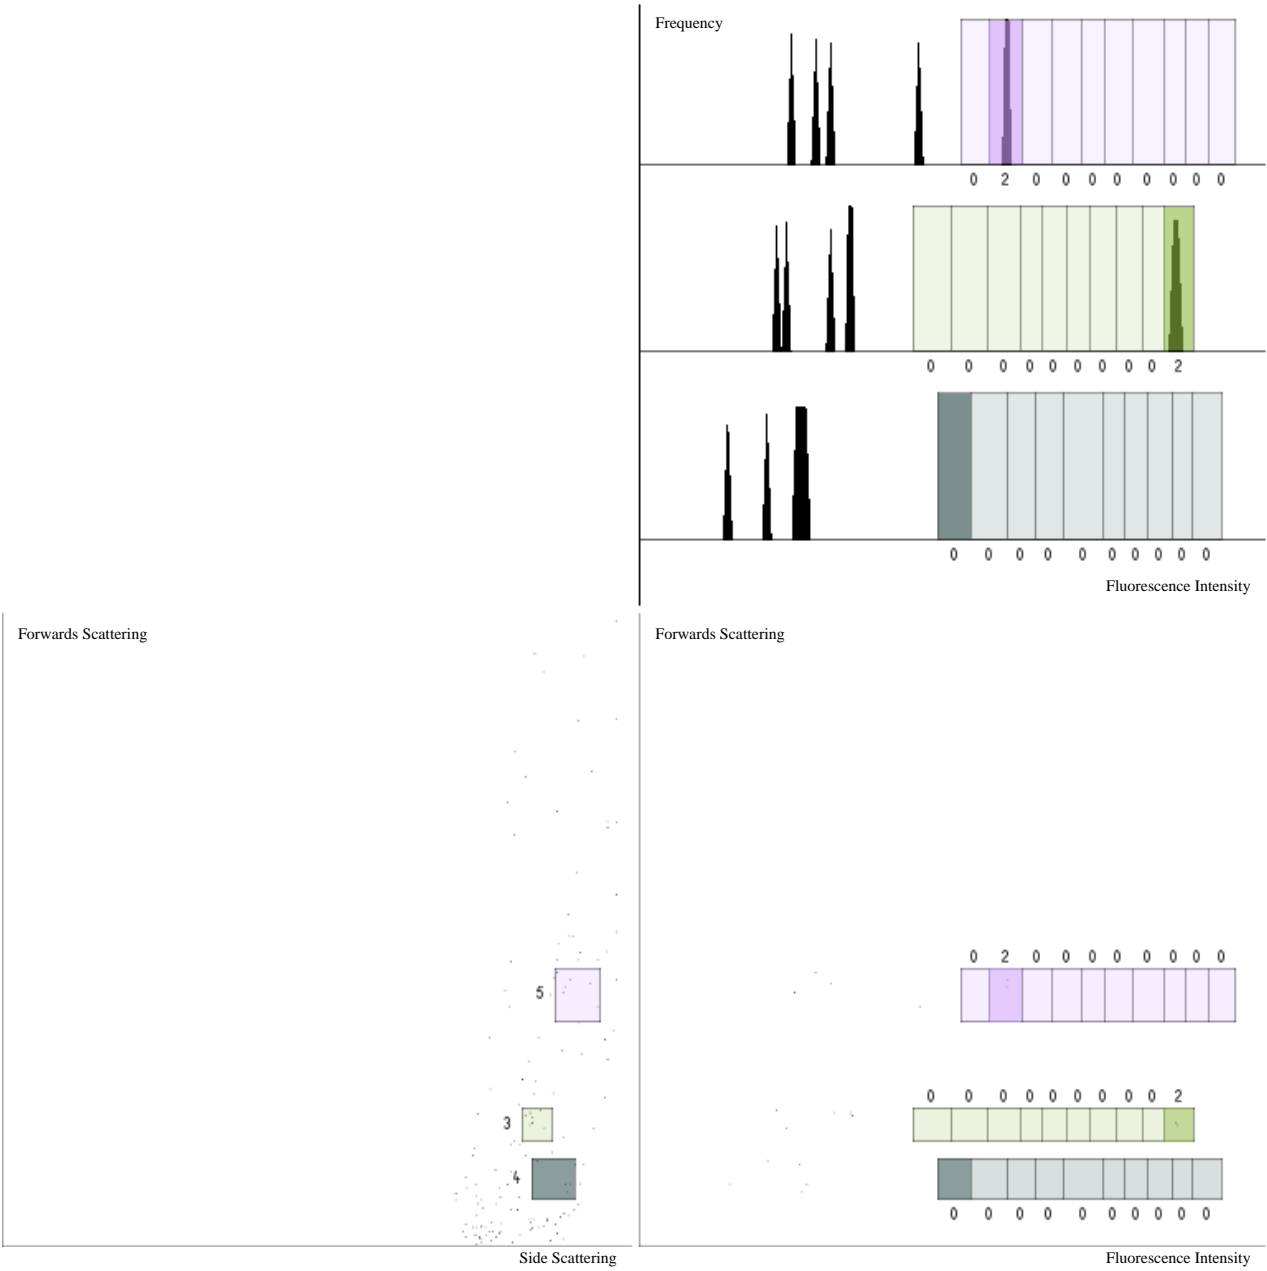

ANNEX 3: TAG DECONVOLUTION - BEAD 145

Passes flow sorting criteria: Yes  
Passes tag deconvolution criteria: Yes  
Included in protocol analysis: Yes  
Protocol: 1, 2, 10, 1  
Filename: Bin1\_plateB1\_F10.fcs  
Split 1: Petrol shading  
Split 2: Green shading  
Split 3: Violet shading

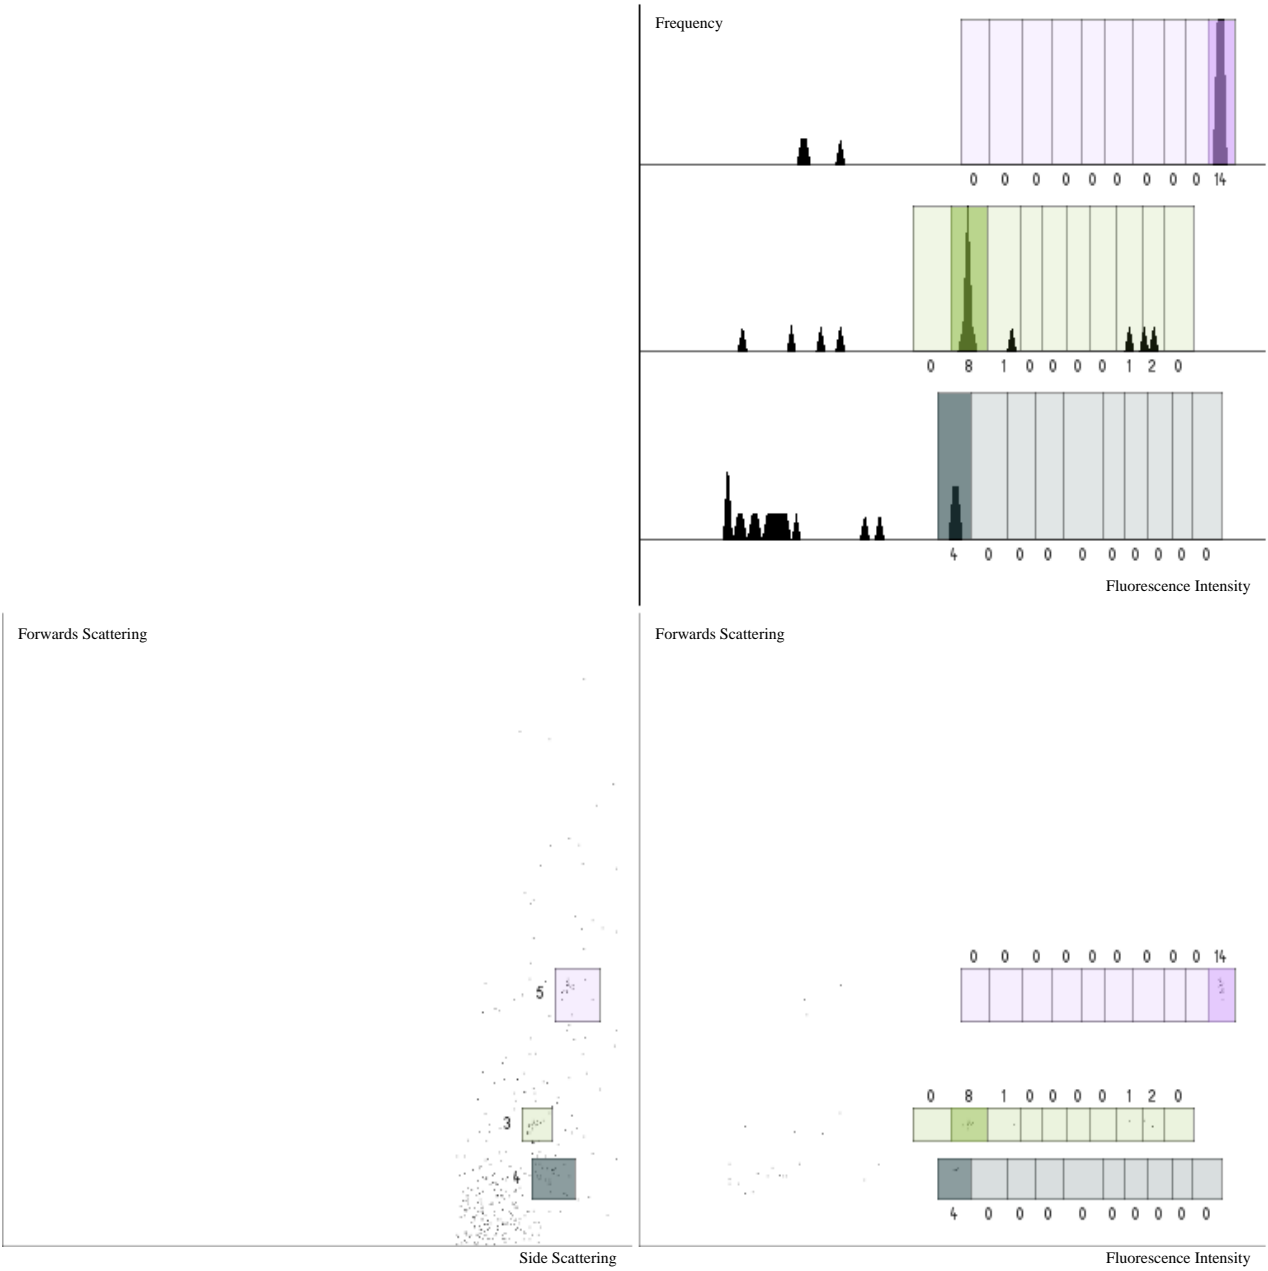

ANNEX 3: TAG DECONVOLUTION - BEAD 146

Passes flow sorting criteria: Yes  
Passes tag deconvolution criteria: No  
Included in protocol analysis: No  
Protocol: N/A  
Filename: Bin1\_plateB1\_G8.fcs  
Split 1: Petrol shading  
Split 2: Green shading  
Split 3: Violet shading

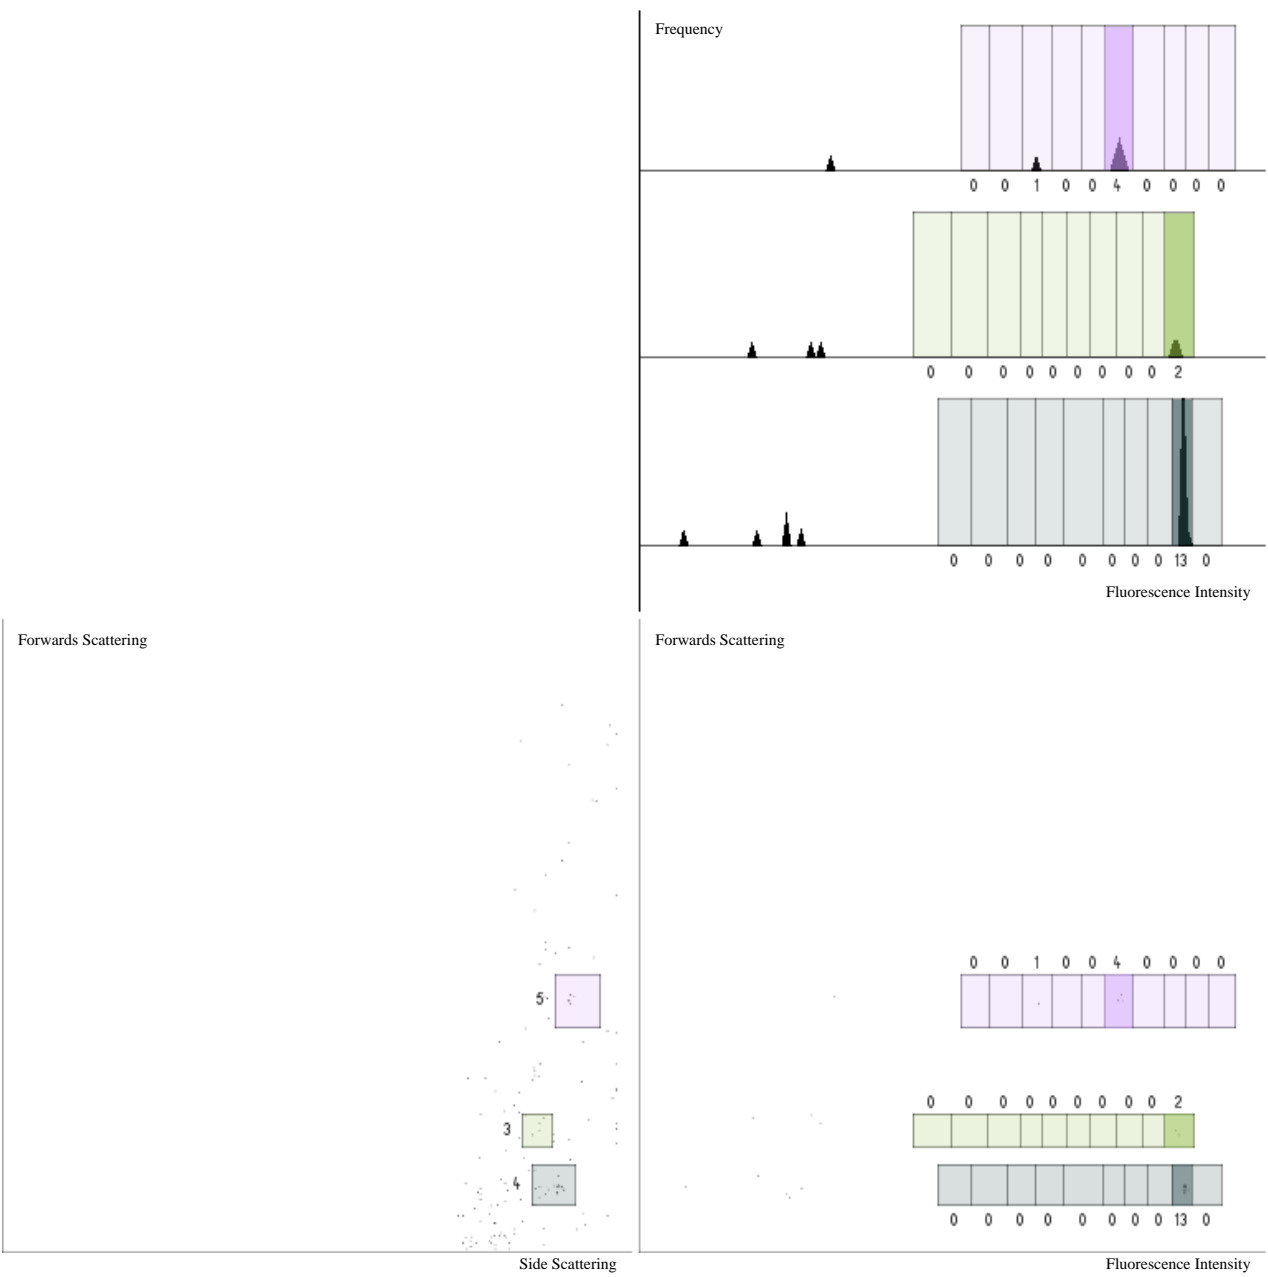

ANNEX 3: TAG DECONVOLUTION - BEAD 147

Passes flow sorting criteria: Yes  
Passes tag deconvolution criteria: Yes  
Included in protocol analysis: Yes  
Protocol: 2, 3, 8, 1  
Filename: Bin1\_plateB1\_G9.fcs  
Split 1: Petrol shading  
Split 2: Green shading  
Split 3: Violet shading

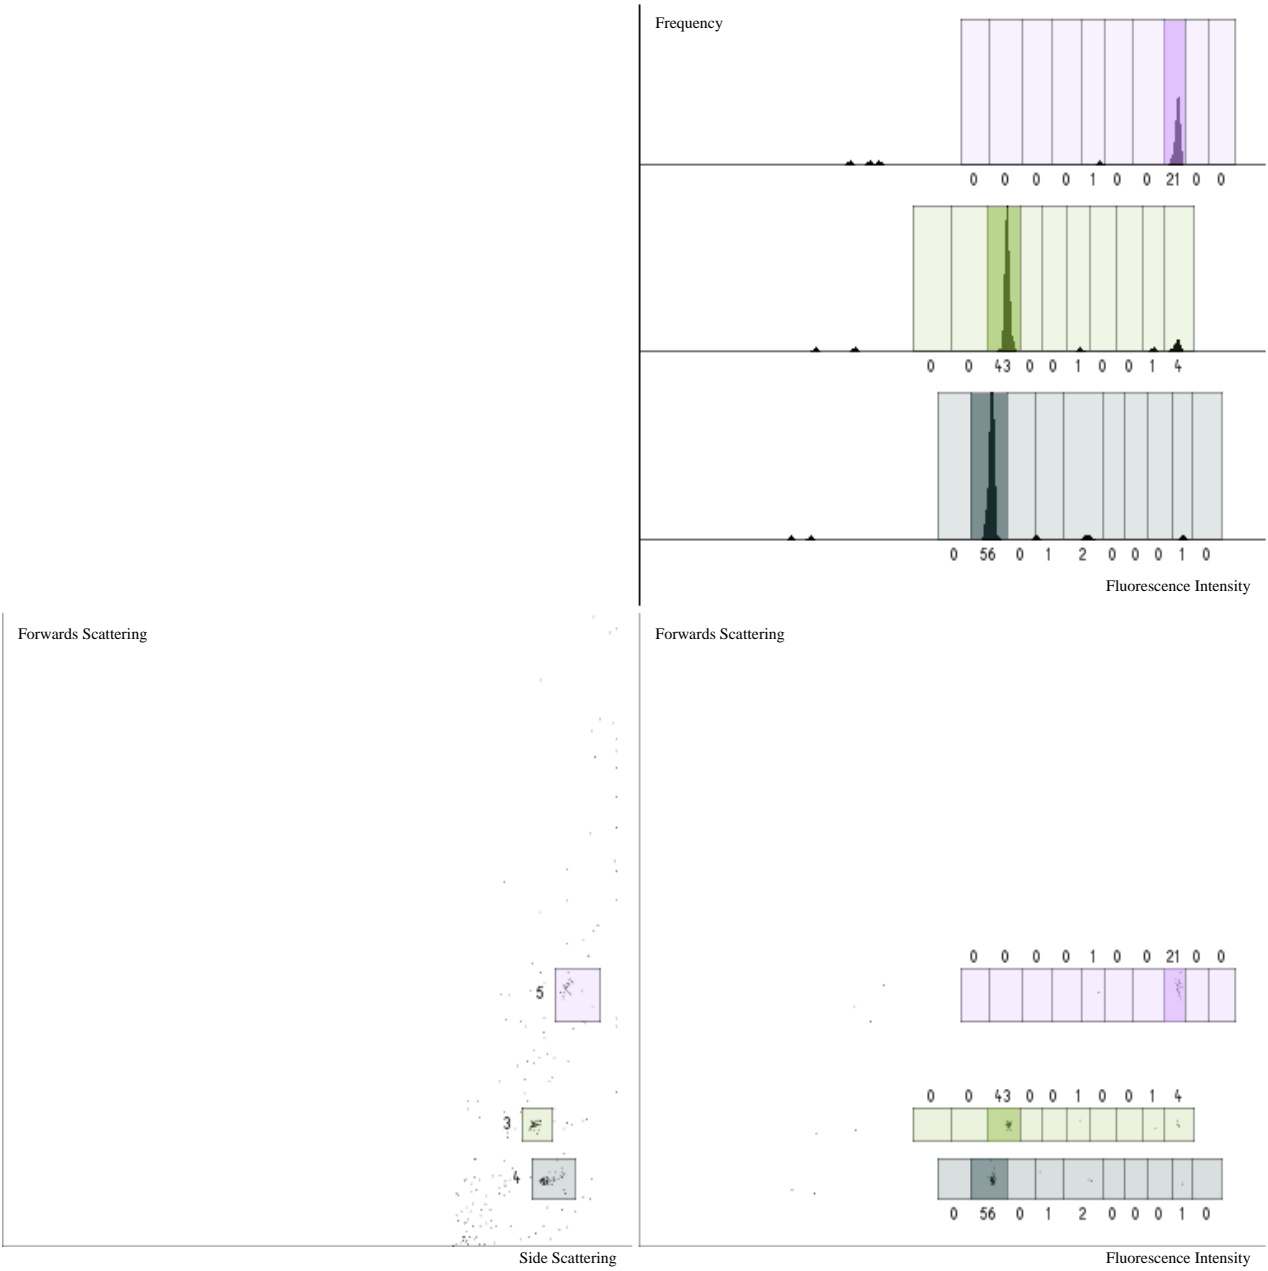

ANNEX 3: TAG DECONVOLUTION - BEAD 148

Passes flow sorting criteria: Yes  
Passes tag deconvolution criteria: Yes  
Included in protocol analysis: Yes  
Protocol: 2, 4, 2, 1  
Filename: Bin1\_plateB1\_G10.fcs  
Split 1: Petrol shading  
Split 2: Green shading  
Split 3: Violet shading

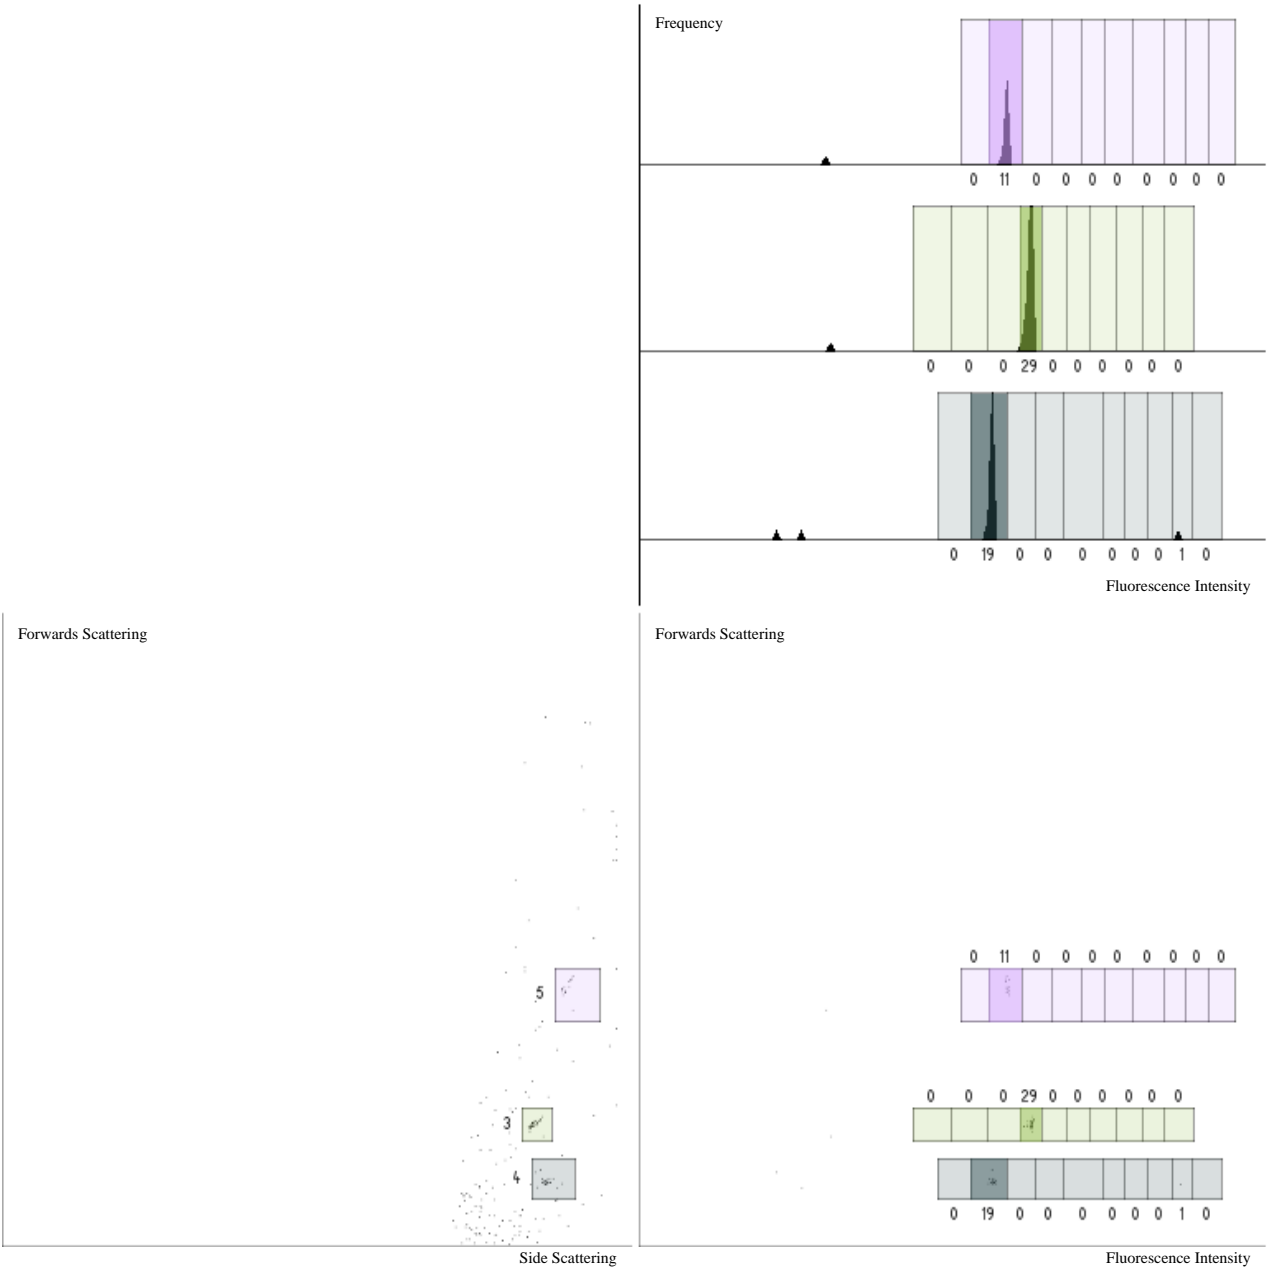

ANNEX 3: TAG DECONVOLUTION - BEAD 149

Passes flow sorting criteria: Yes  
Passes tag deconvolution criteria: No  
Included in protocol analysis: No  
Protocol: N/A  
Filename: Bin1\_plateB1\_H8.fcs  
Split 1: Petrol shading  
Split 2: Green shading  
Split 3: Violet shading

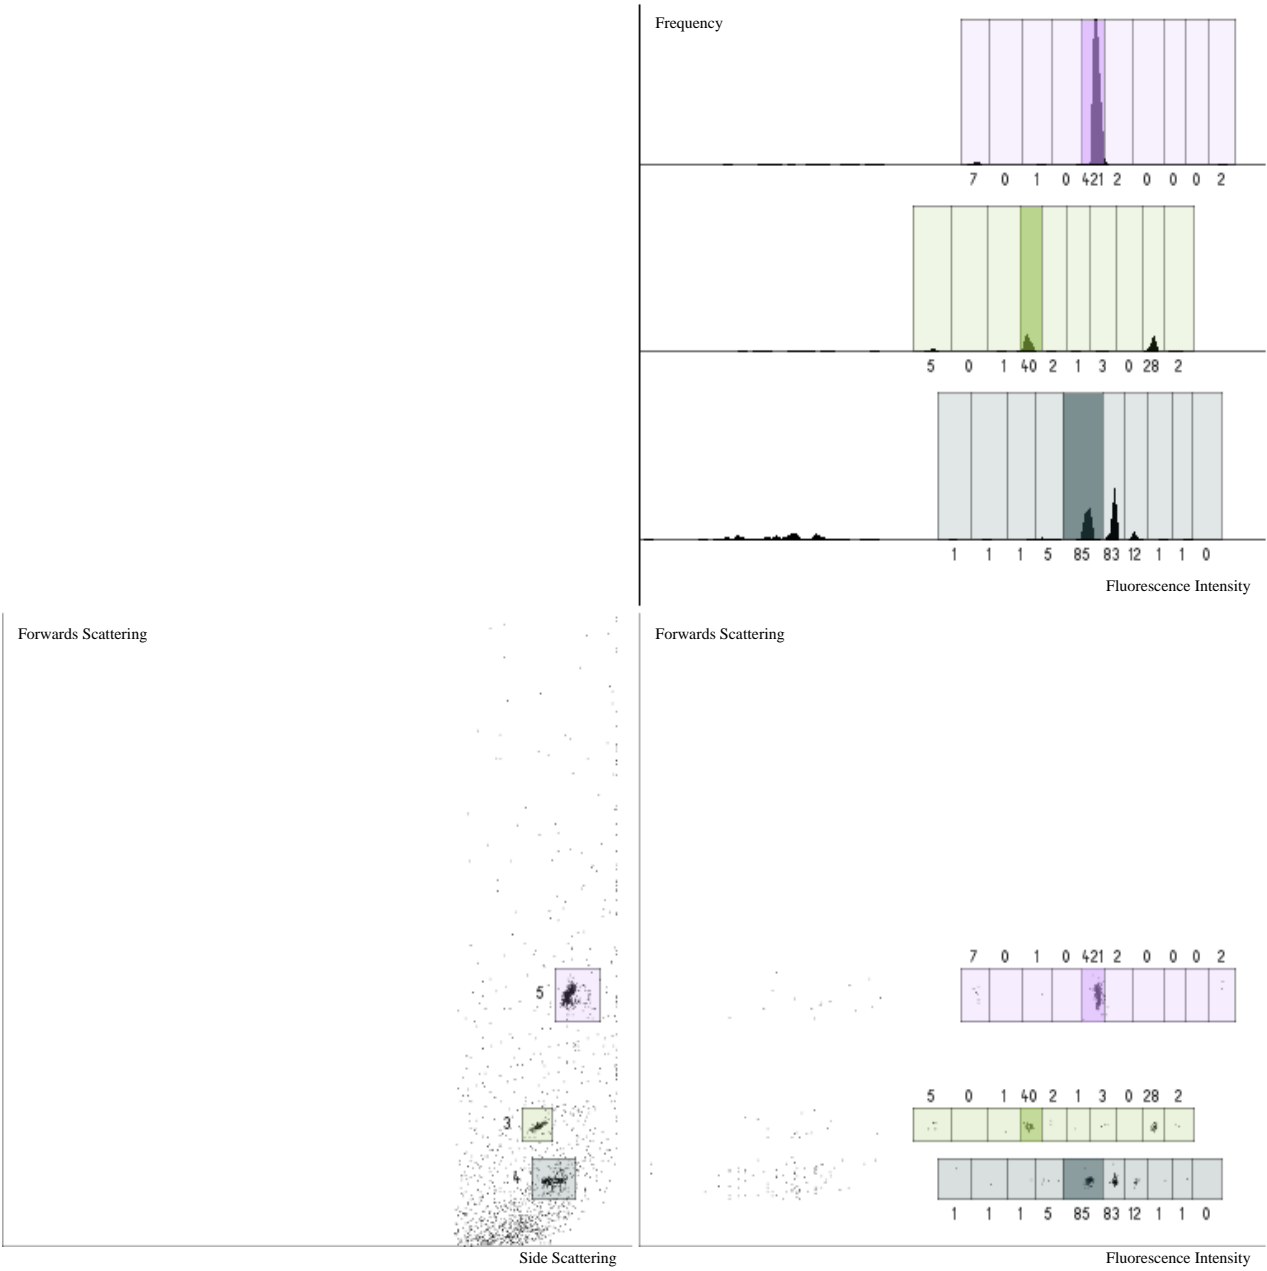

ANNEX 3: TAG DECONVOLUTION - BEAD 150

Passes flow sorting criteria: Yes  
Passes tag deconvolution criteria: Yes  
Included in protocol analysis: Yes  
Protocol: 4, 7, 10, 1  
Filename: Bin1\_plateB1\_H9.fcs  
Split 1: Petrol shading  
Split 2: Green shading  
Split 3: Violet shading

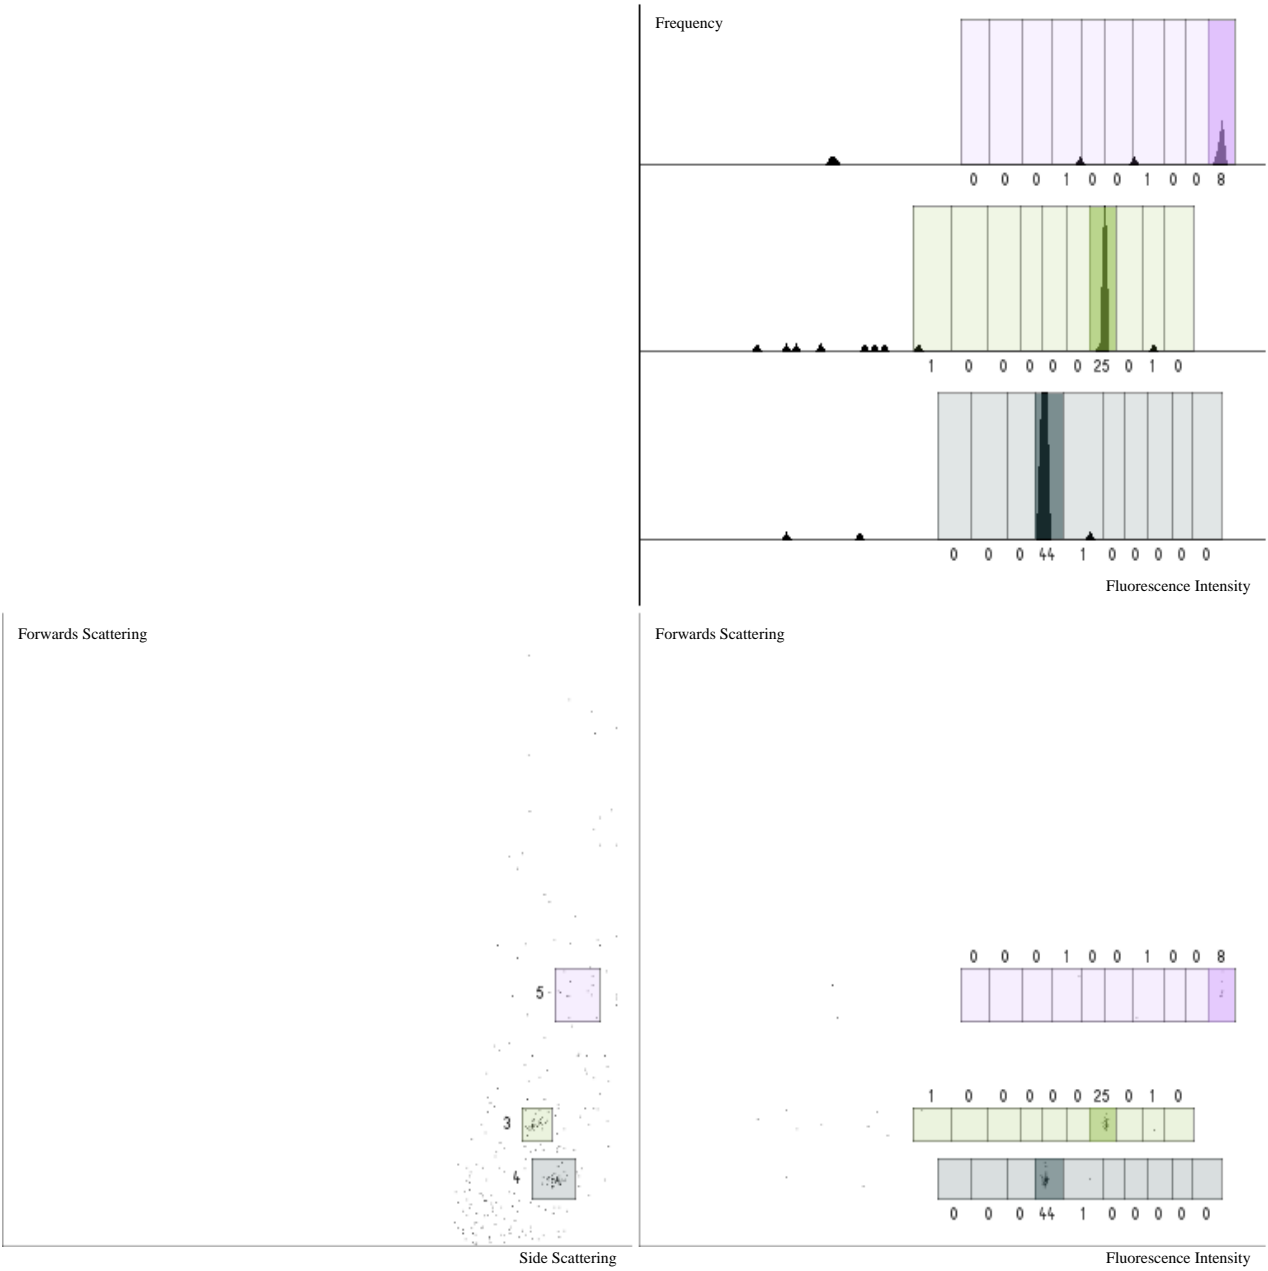



ANNEX 3: TAG DECONVOLUTION - BEAD 151

Passes flow sorting criteria: Yes  
Passes tag deconvolution criteria: Yes  
Included in protocol analysis: Yes  
Protocol: 4, 4, 5, 1  
Filename: Bin1\_plateB1\_H11.fcs  
Split 1: Petrol shading  
Split 2: Green shading  
Split 3: Violet shading

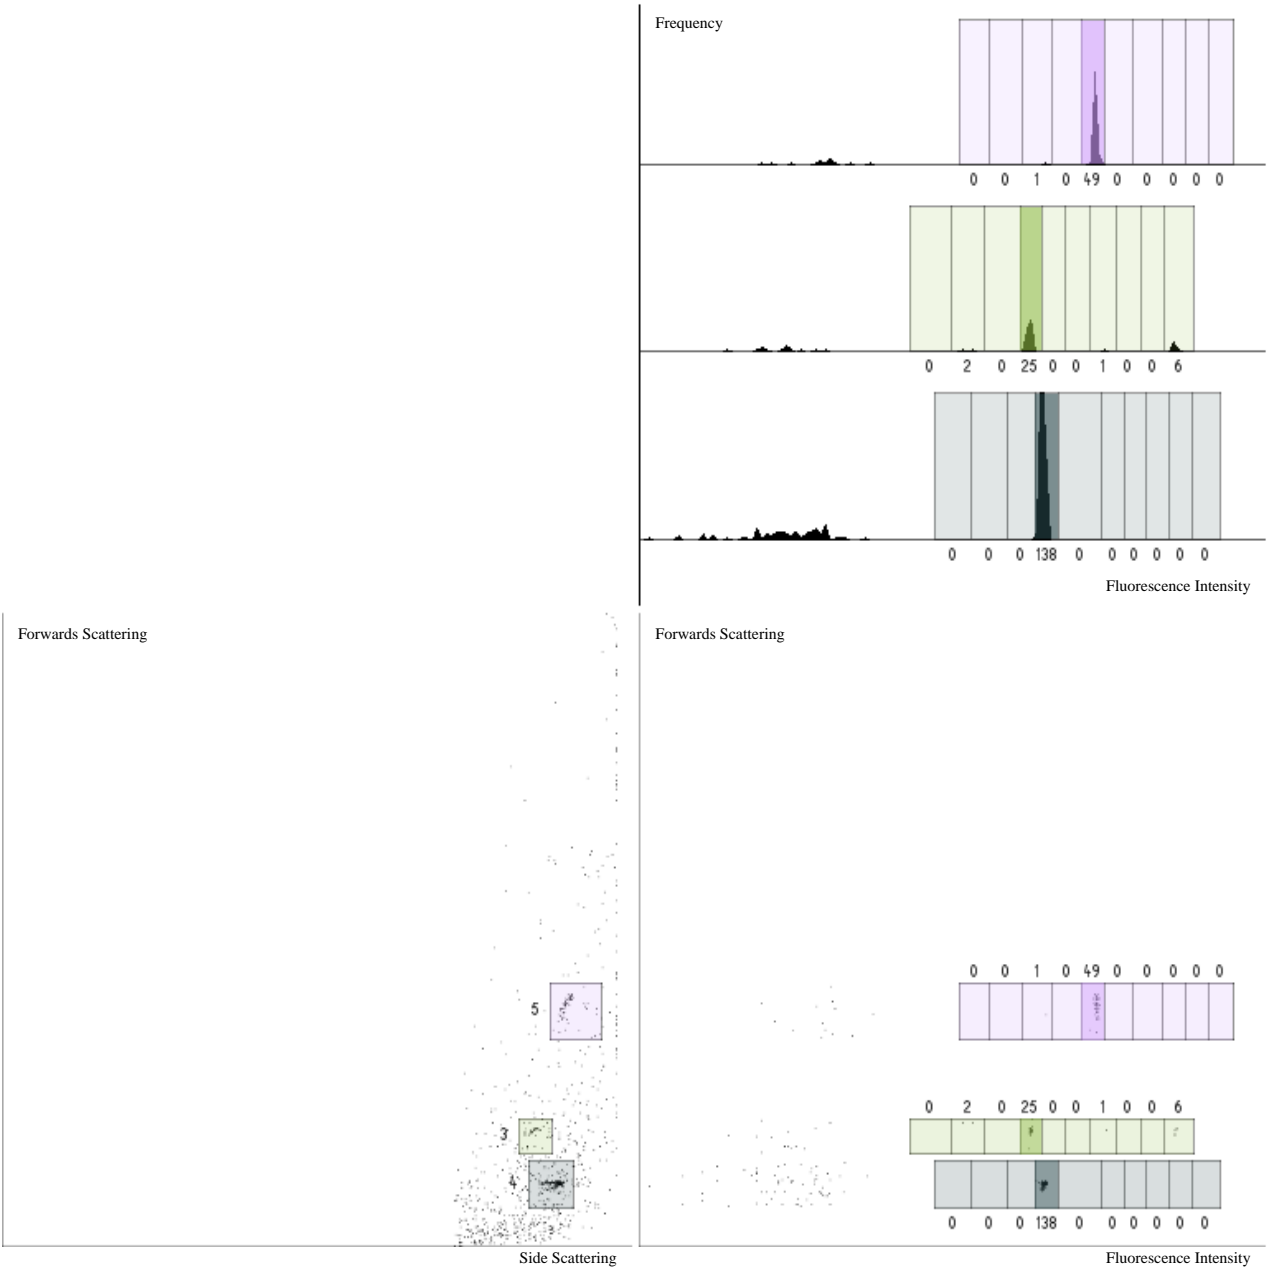

ANNEX 3: TAG DECONVOLUTION - BEAD 152

Passes flow sorting criteria: Yes  
Passes tag deconvolution criteria: Yes  
Included in protocol analysis: Yes  
Protocol: 7, 9, 7, 1  
Filename: Bin1\_plateB1\_A12.fcs  
Split 1: Petrol shading  
Split 2: Green shading  
Split 3: Violet shading

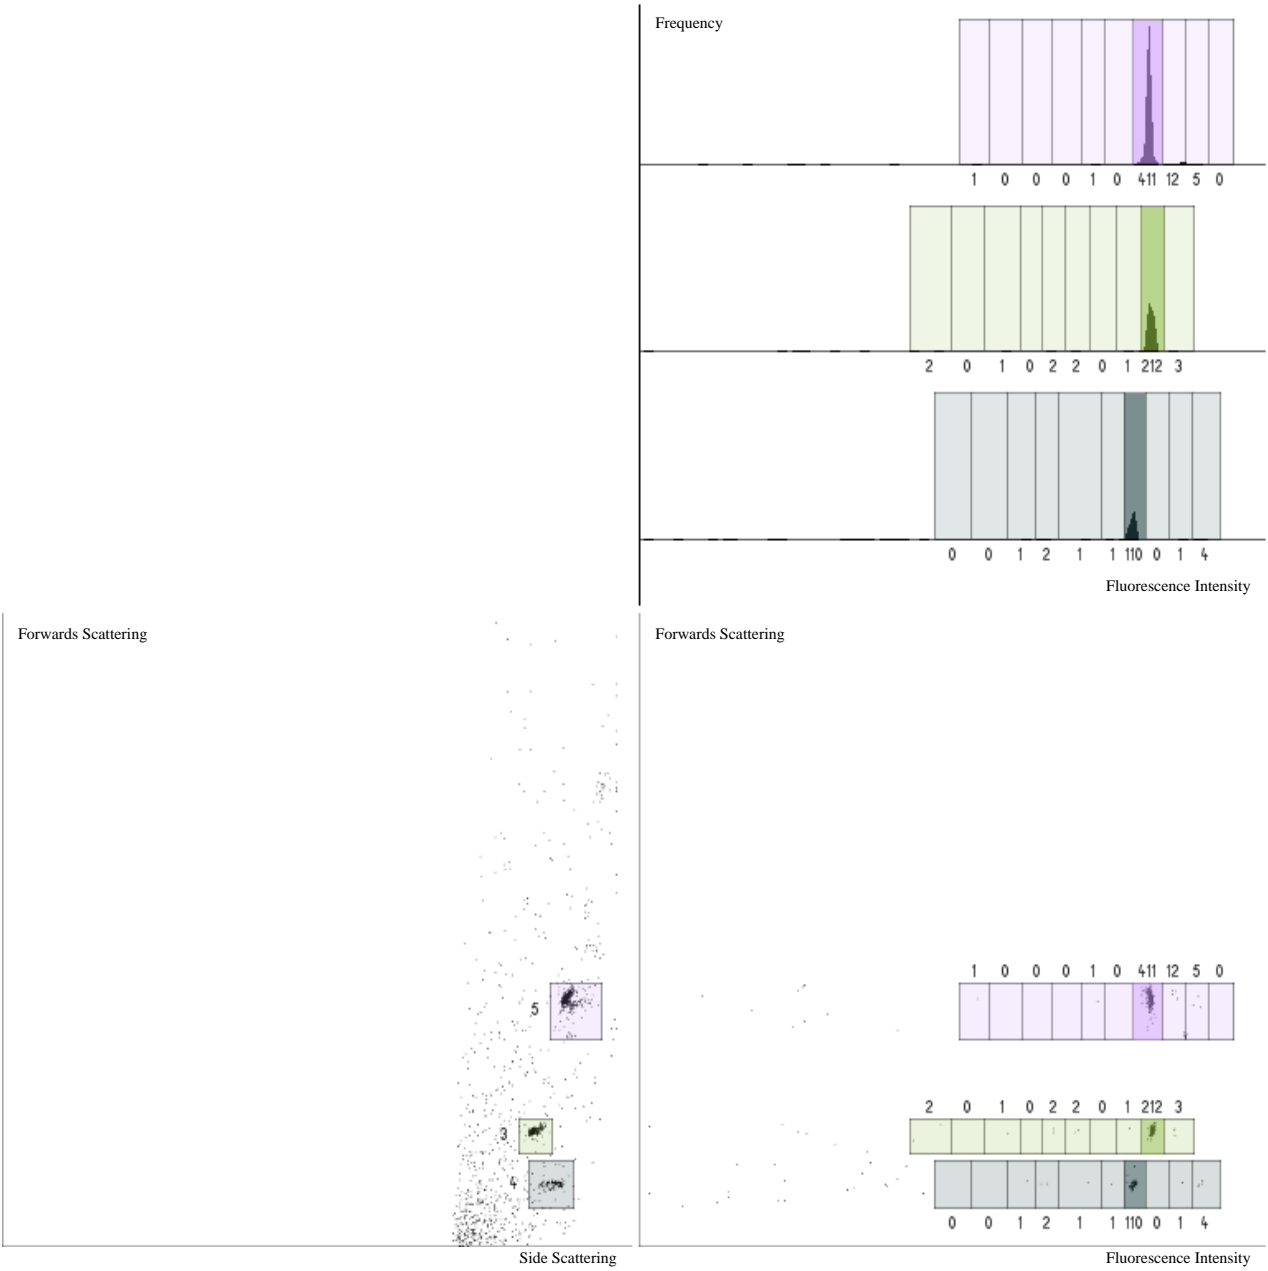

ANNEX 3: TAG DECONVOLUTION - BEAD 153

Passes flow sorting criteria: Yes  
Passes tag deconvolution criteria: No  
Included in protocol analysis: No  
Protocol: N/A  
Filename: Bin1\_plateB1\_B11.fcs  
Split 1: Petrol shading  
Split 2: Green shading  
Split 3: Violet shading

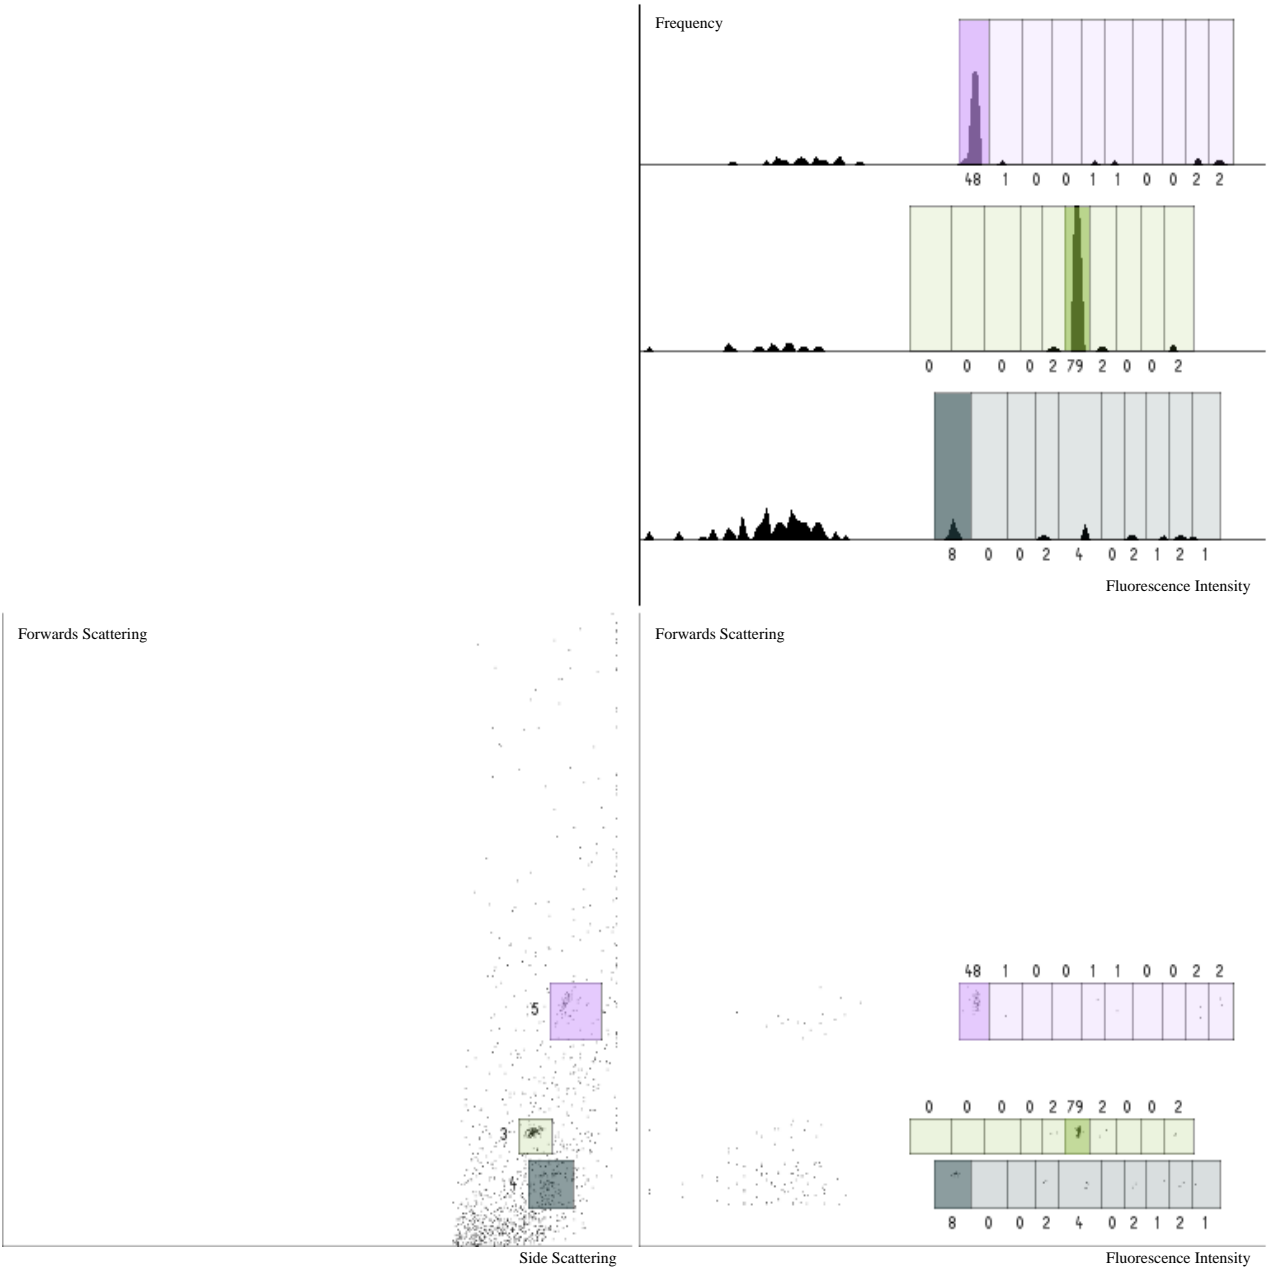

ANNEX 3: TAG DECONVOLUTION - BEAD 154

Passes flow sorting criteria: Yes  
Passes tag deconvolution criteria: No  
Included in protocol analysis: No  
Protocol: N/A  
Filename: Bin1\_plateB1\_B12.fcs  
Split 1: Petrol shading  
Split 2: Green shading  
Split 3: Violet shading

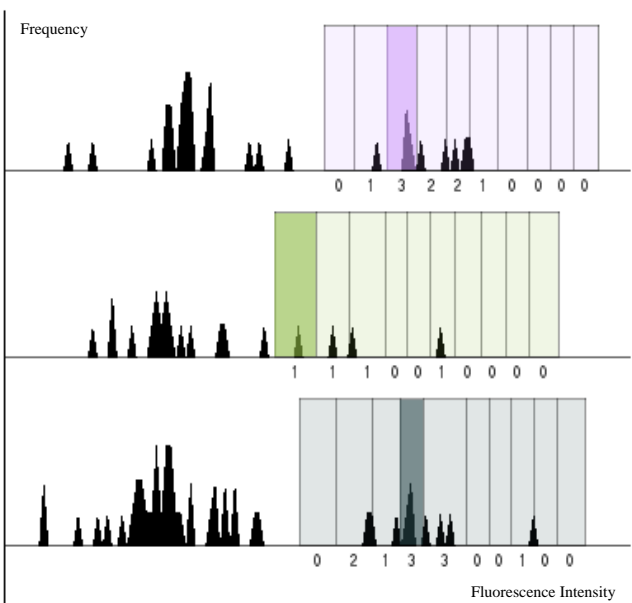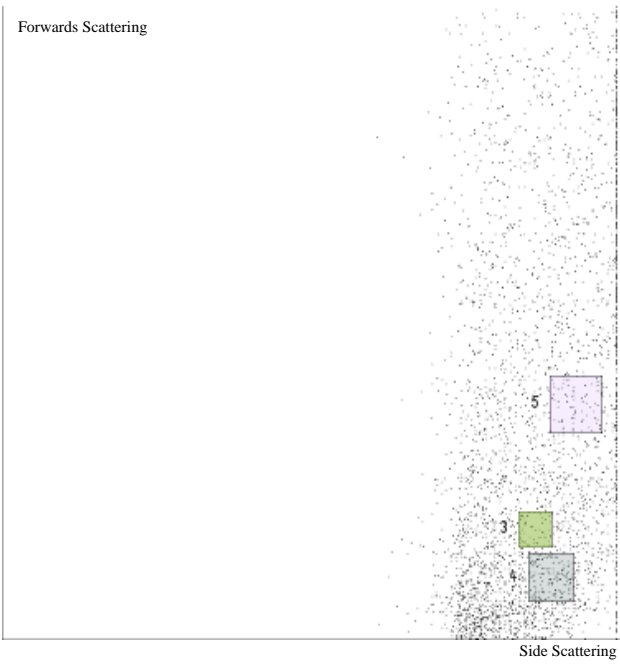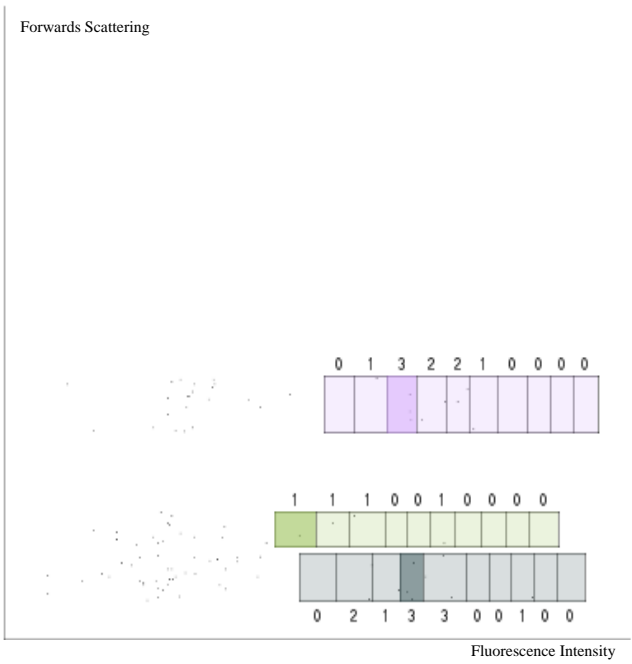

ANNEX 3: TAG DECONVOLUTION - BEAD 155

Passes flow sorting criteria: Yes  
Passes tag deconvolution criteria: Yes  
Included in protocol analysis: Yes  
Protocol: 8, 8, 9, 1  
Filename: Bin1\_plateB1\_C12.fcs  
Split 1: Petrol shading  
Split 2: Green shading  
Split 3: Violet shading

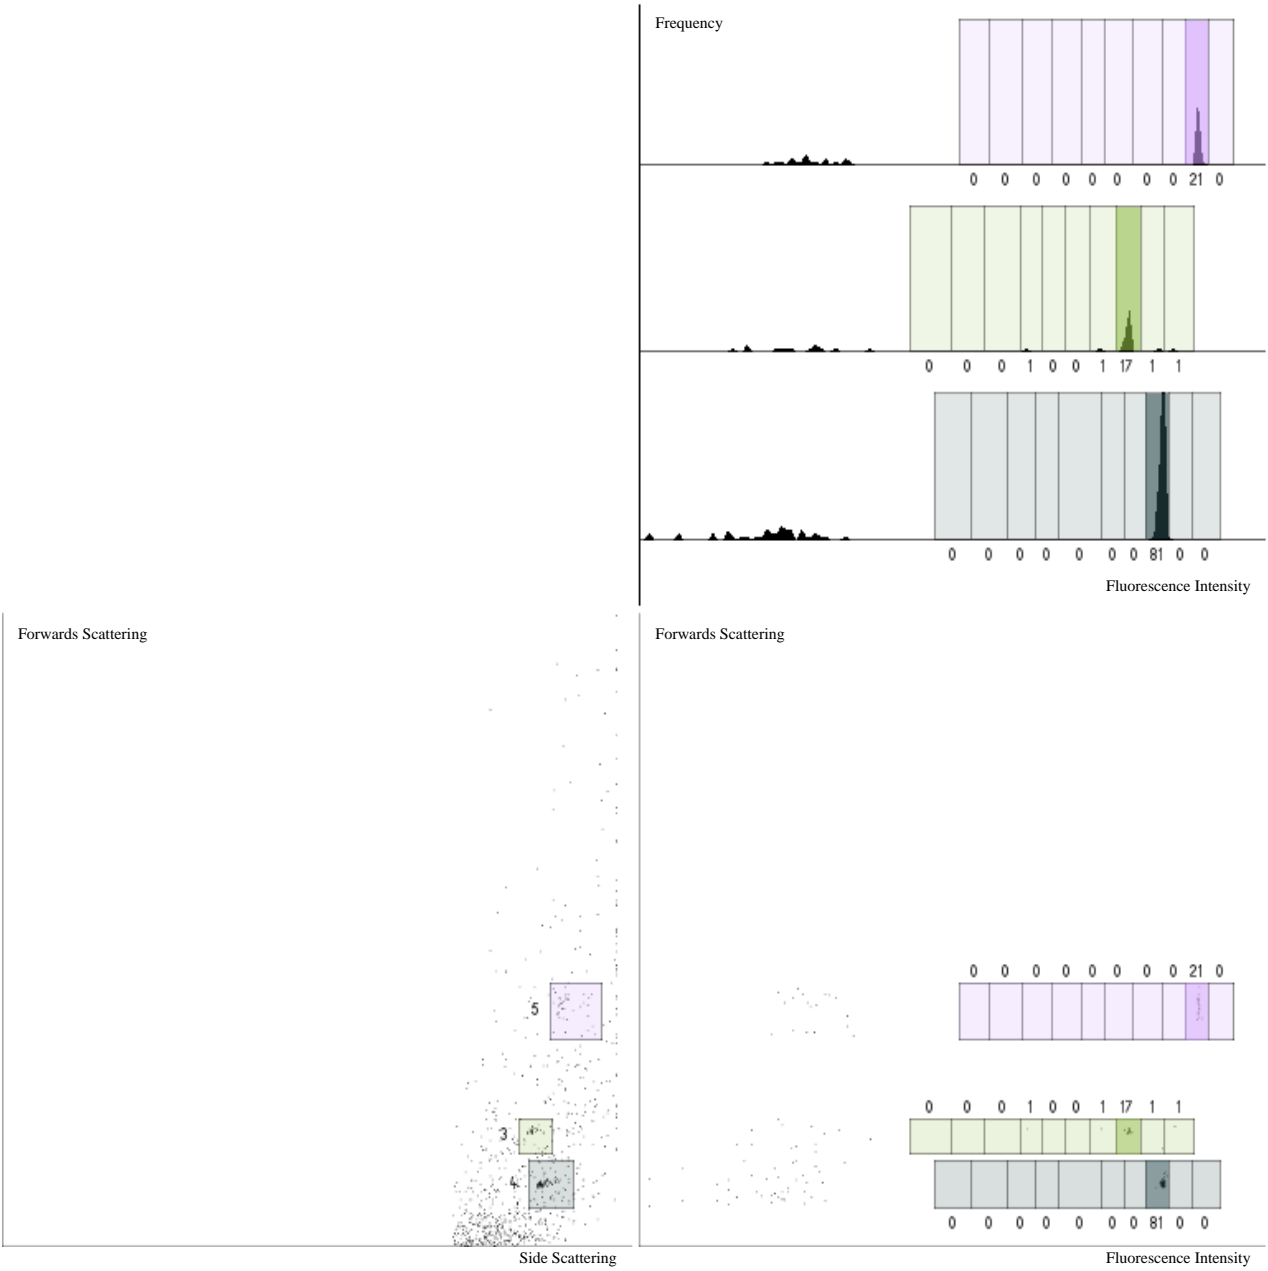

ANNEX 3: TAG DECONVOLUTION - BEAD 156

Passes flow sorting criteria: Yes  
Passes tag deconvolution criteria: No  
Included in protocol analysis: No  
Protocol: N/A  
Filename: Bin1\_plateB1\_F12.fcs  
Split 1: Petrol shading  
Split 2: Green shading  
Split 3: Violet shading

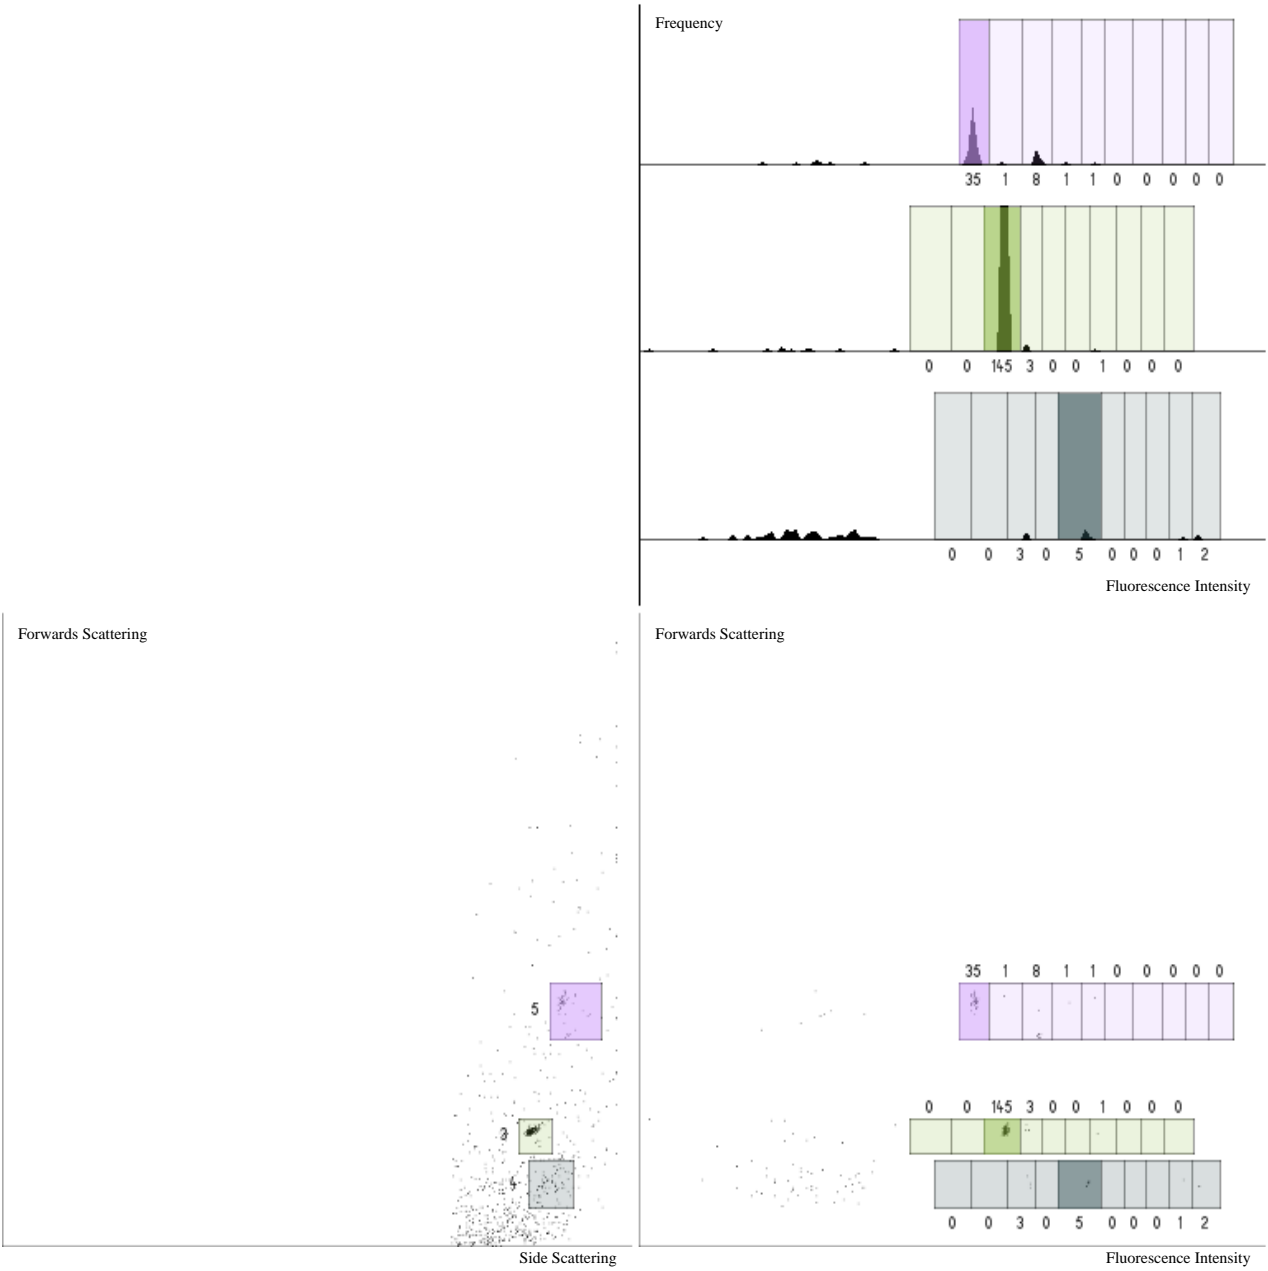

ANNEX 3: TAG DECONVOLUTION - BEAD 157

Passes flow sorting criteria: Yes  
Passes tag deconvolution criteria: No  
Included in protocol analysis: No  
Protocol: N/A  
Filename: Bin1\_plateB1\_G11.fcs  
Split 1: Petrol shading  
Split 2: Green shading  
Split 3: Violet shading

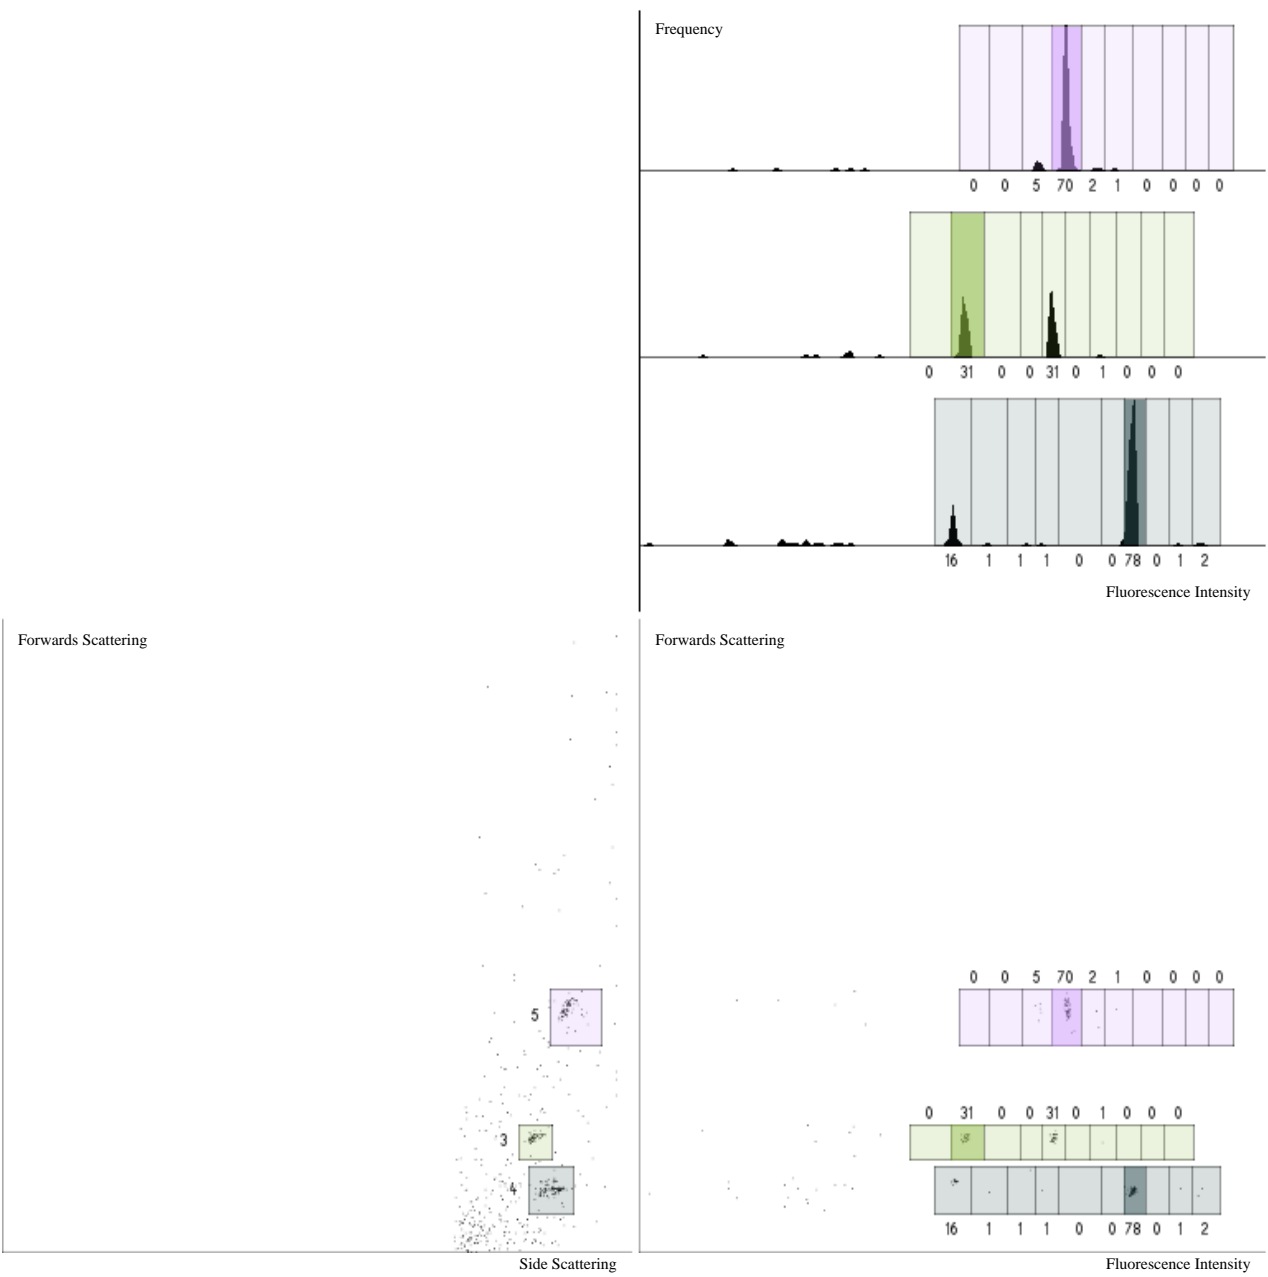

ANNEX 3: TAG DECONVOLUTION - BEAD 158

Passes flow sorting criteria: Yes  
Passes tag deconvolution criteria: Yes  
Included in protocol analysis: Yes  
Protocol: 10, 5, 10, 1  
Filename: Bin1\_plateC2\_C6.fcs  
Split 1: Petrol shading  
Split 2: Green shading  
Split 3: Violet shading

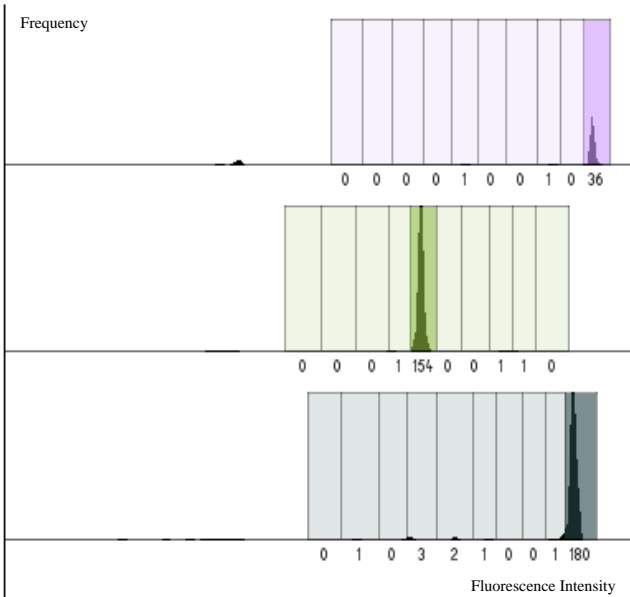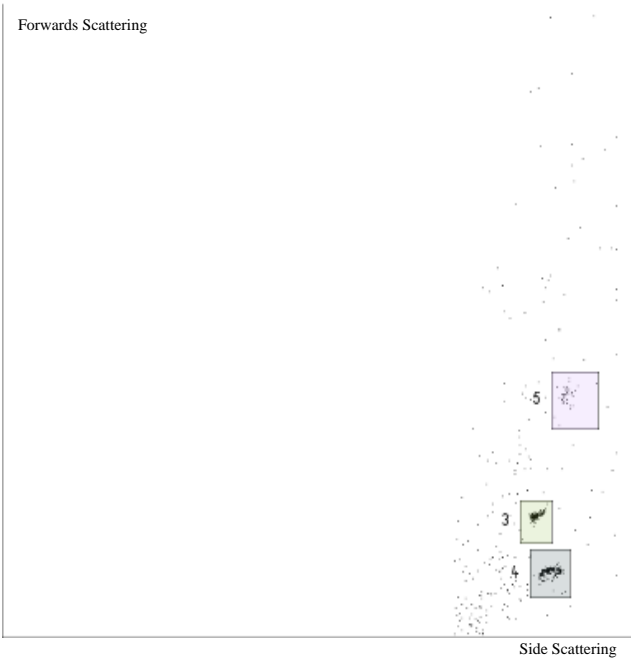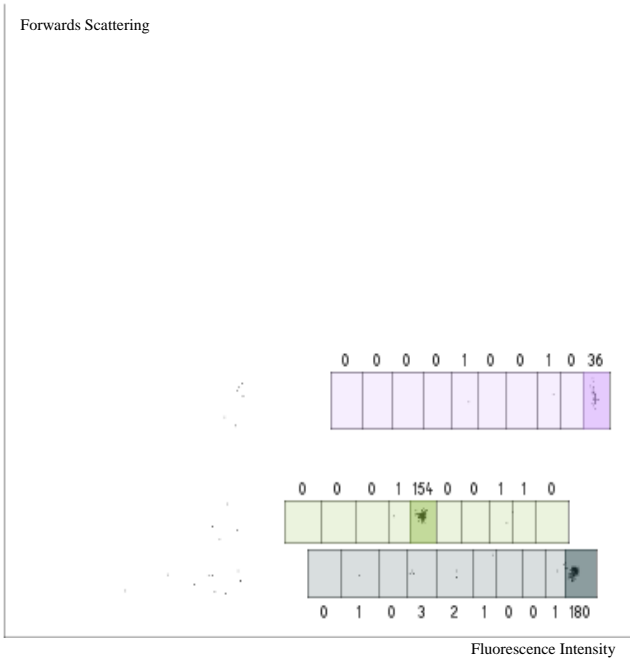



ANNEX 3: TAG DECONVOLUTION - BEAD 159

Passes flow sorting criteria: Yes  
Passes tag deconvolution criteria: Yes  
Included in protocol analysis: Yes  
Protocol: 3, 1, 10, 1  
Filename: Bin1\_plateC2\_A1.fcs  
Split 1: Petrol shading  
Split 2: Green shading  
Split 3: Violet shading

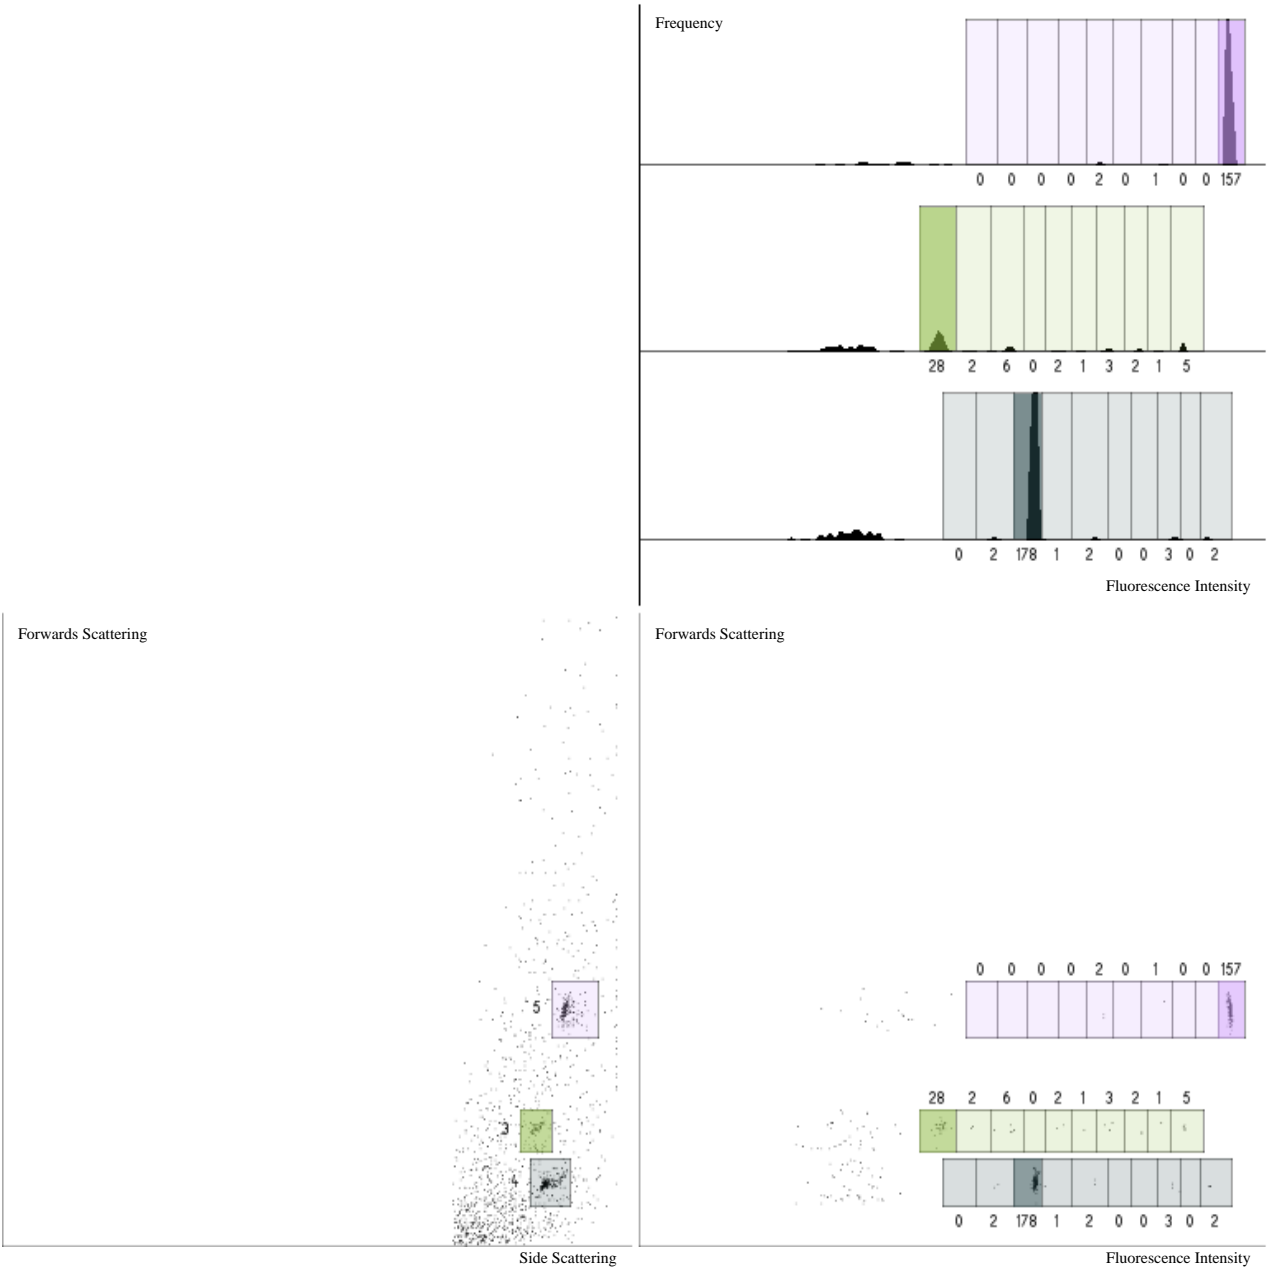

ANNEX 3: TAG DECONVOLUTION - BEAD 160

Passes flow sorting criteria: Yes  
Passes tag deconvolution criteria: Yes  
Included in protocol analysis: Yes  
Protocol: 8, 6, 9, 1  
Filename: Bin1\_plateC2\_A2.fcs  
Split 1: Petrol shading  
Split 2: Green shading  
Split 3: Violet shading

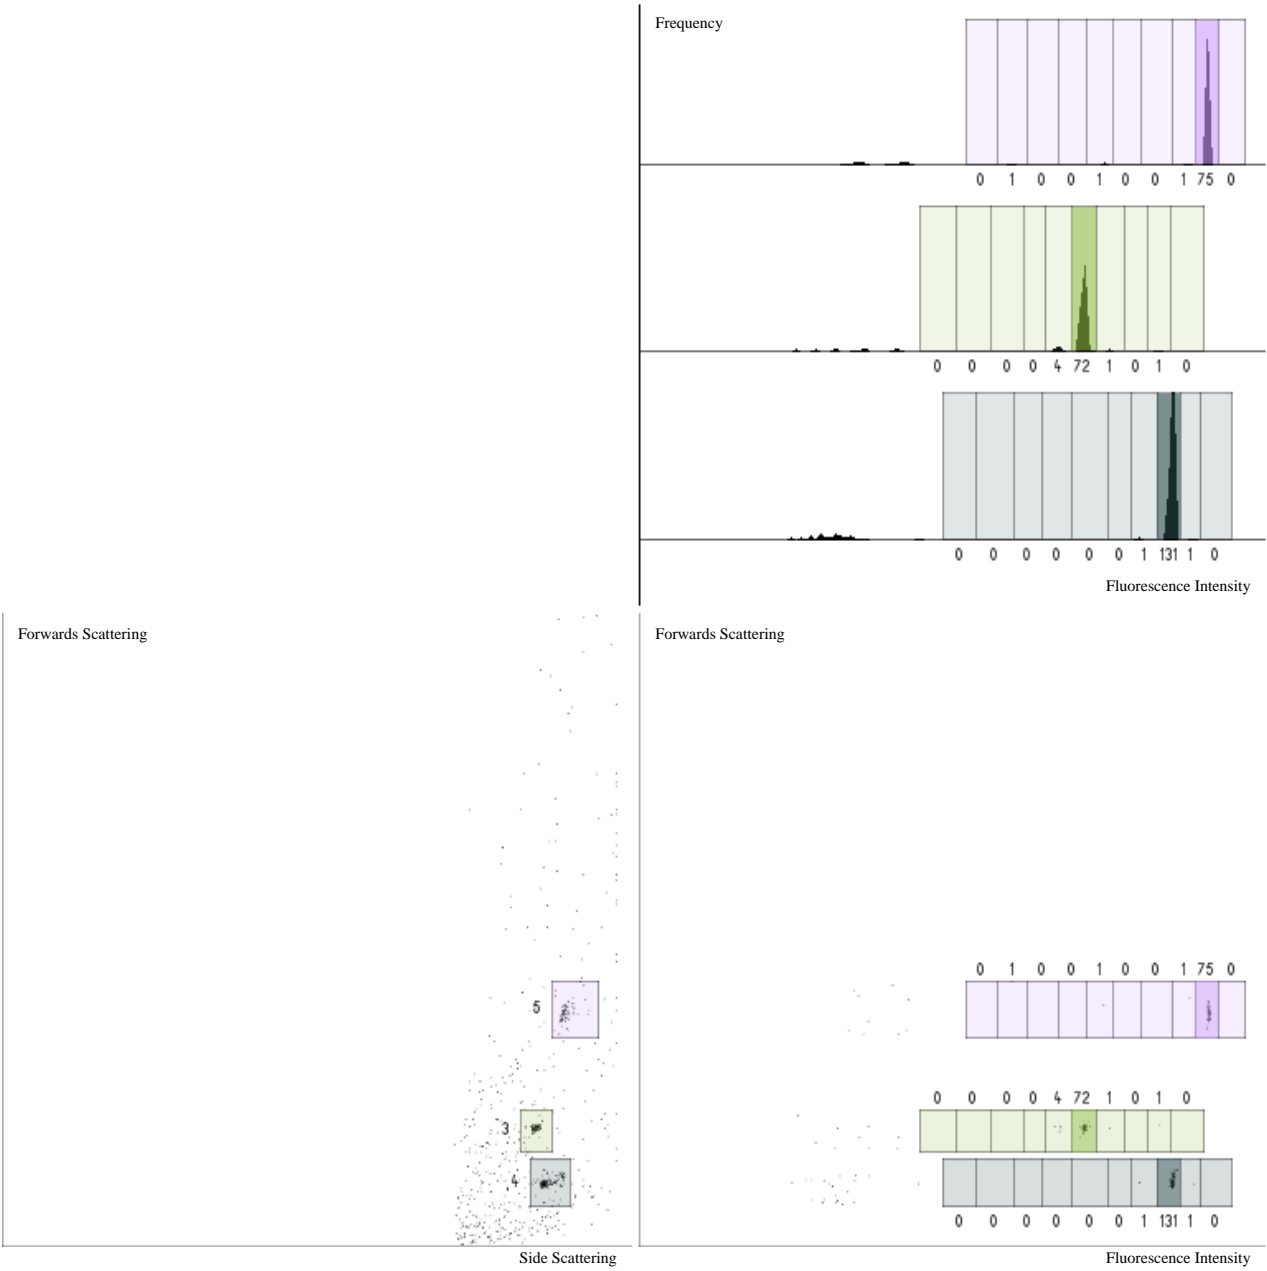

ANNEX 3: TAG DECONVOLUTION - BEAD 161

Passes flow sorting criteria: Yes  
Passes tag deconvolution criteria: Yes  
Included in protocol analysis: Yes  
Protocol: 8, 4, 8, 1  
Filename: Bin1\_plateC2\_A4.fcs  
Split 1: Petrol shading  
Split 2: Green shading  
Split 3: Violet shading

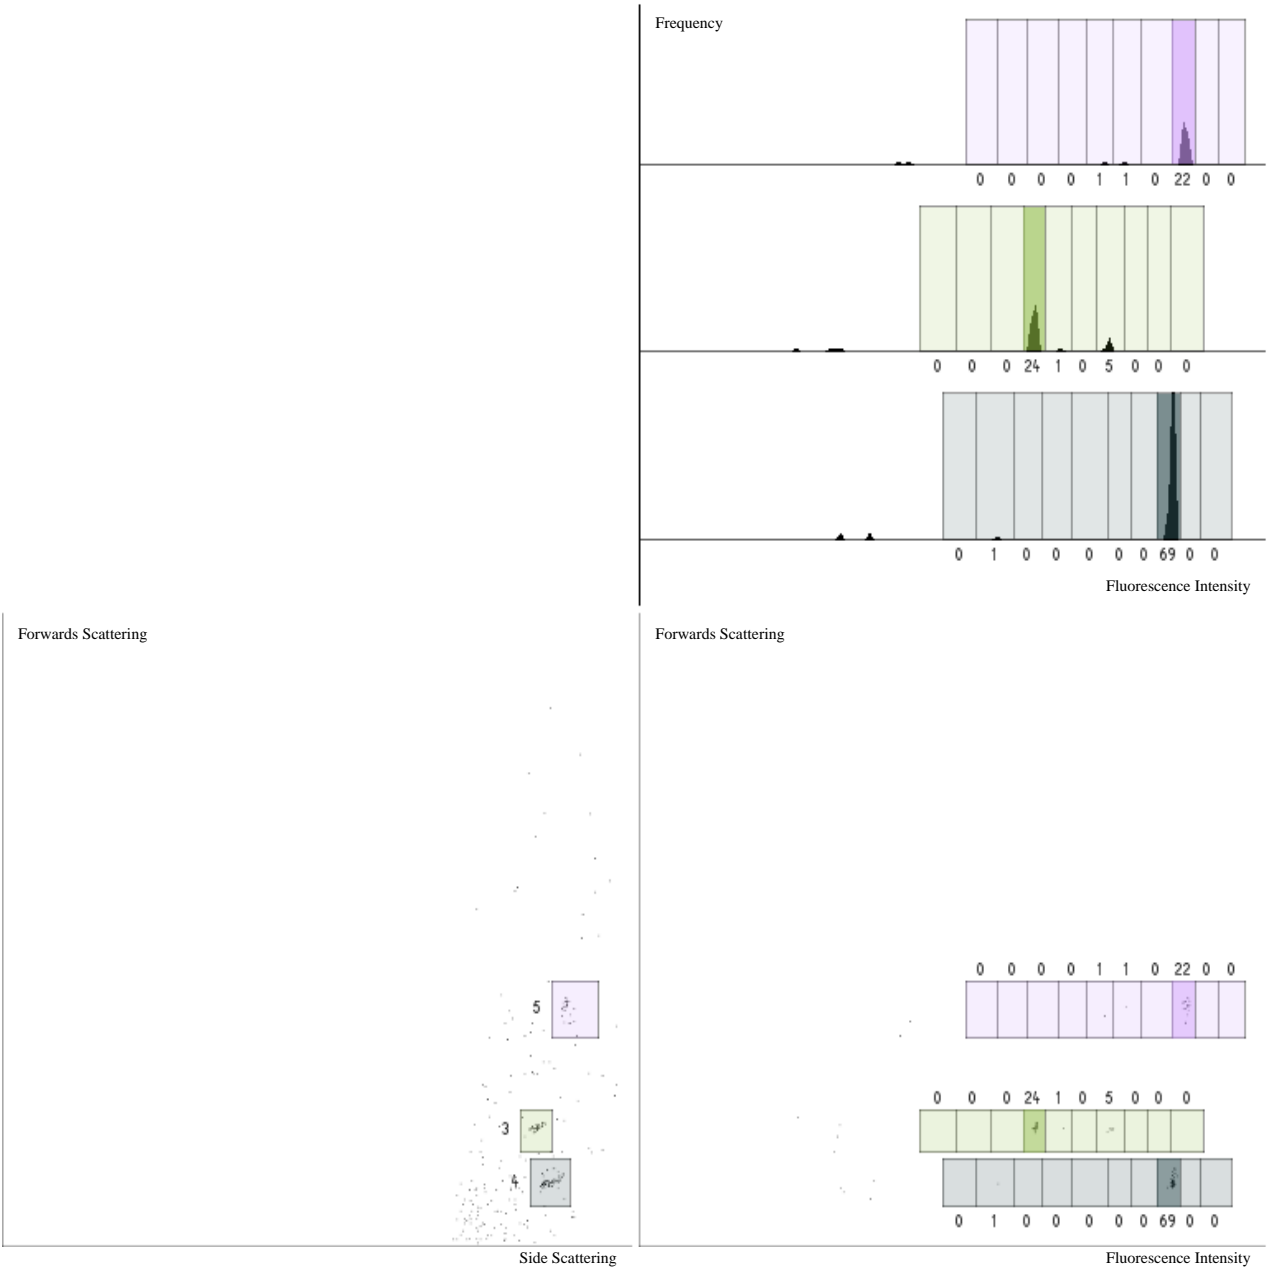

ANNEX 3: TAG DECONVOLUTION - BEAD 162

Passes flow sorting criteria: Yes  
Passes tag deconvolution criteria: Yes  
Included in protocol analysis: Yes  
Protocol: 8, 10, 3, 1  
Filename: Bin1\_plateC2\_A5.fcs  
Split 1: Petrol shading  
Split 2: Green shading  
Split 3: Violet shading

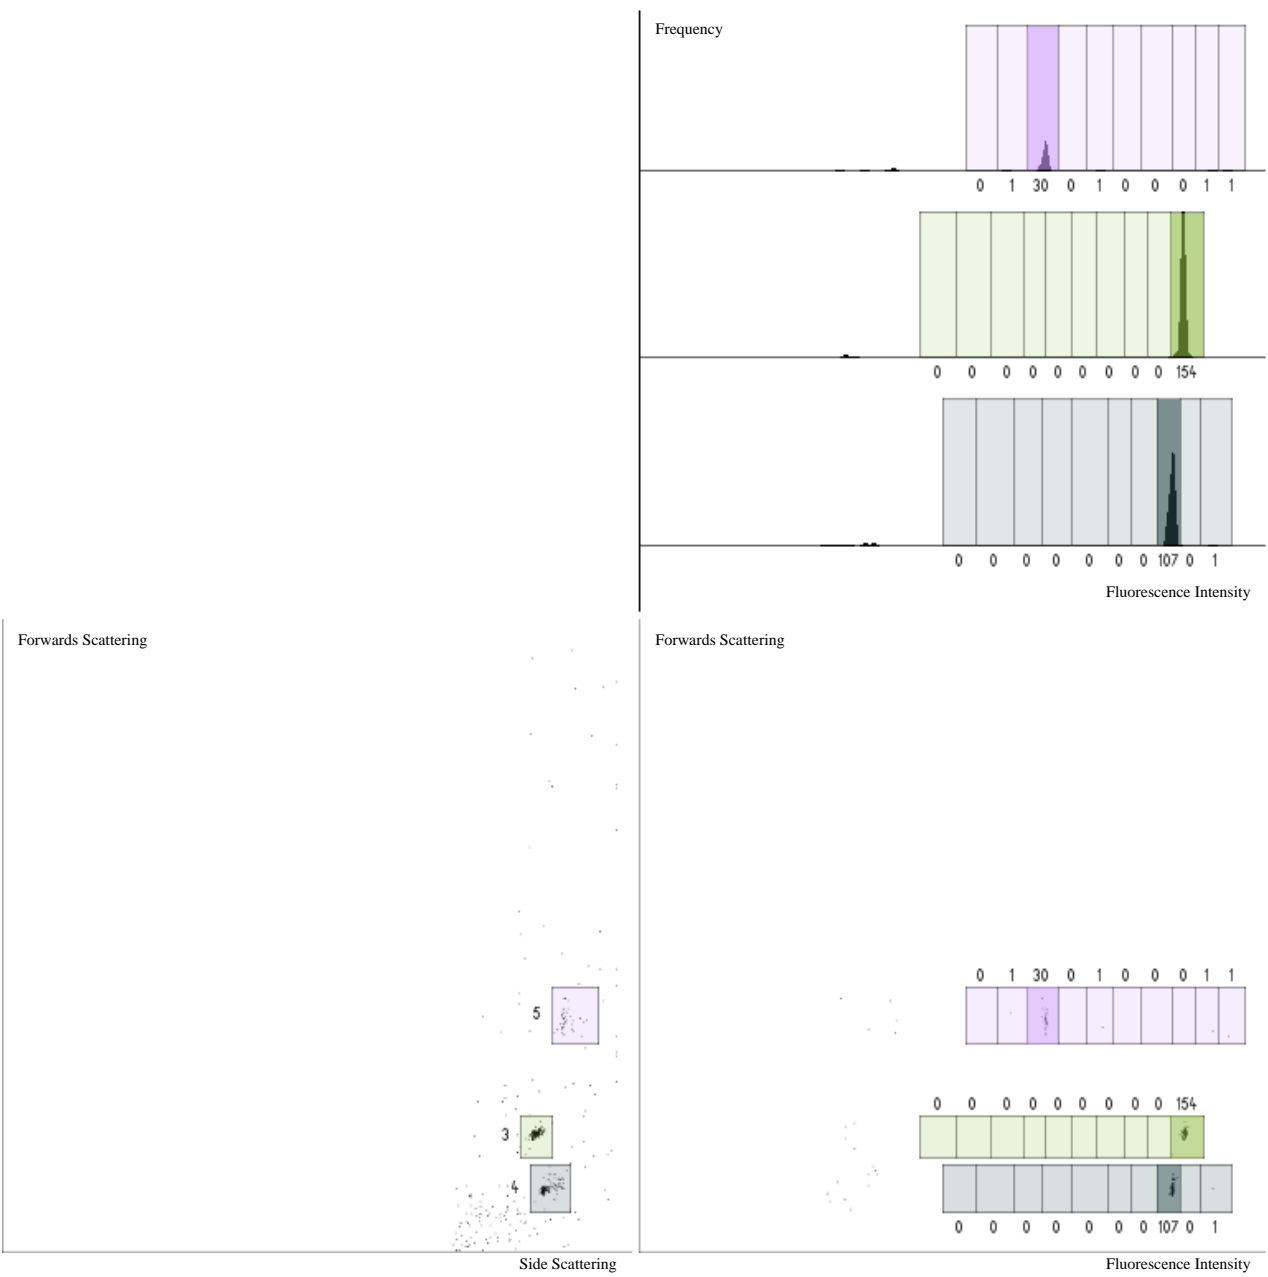

ANNEX 3: TAG DECONVOLUTION - BEAD 163

Passes flow sorting criteria: Yes  
Passes tag deconvolution criteria: Yes  
Included in protocol analysis: Yes  
Protocol: 6, 9, 1, 1  
Filename: Bin1\_plateC2\_A6.fcs  
Split 1: Petrol shading  
Split 2: Green shading  
Split 3: Violet shading

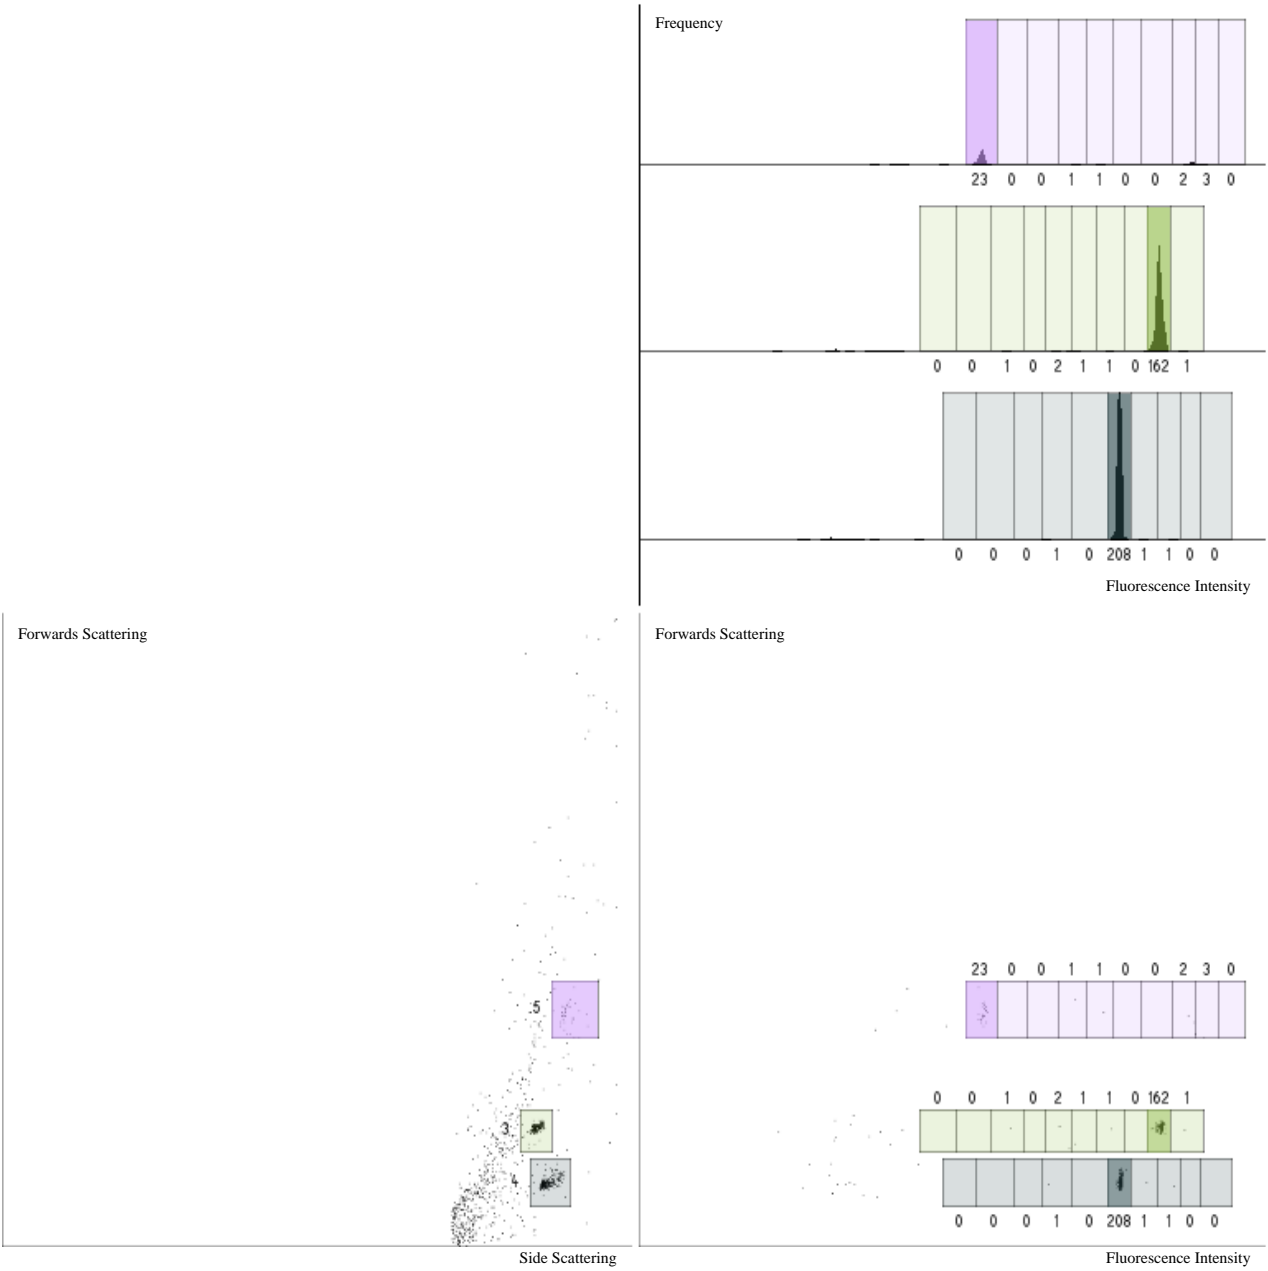

ANNEX 3: TAG DECONVOLUTION - BEAD 164

Passes flow sorting criteria: Yes  
Passes tag deconvolution criteria: Yes  
Included in protocol analysis: Yes  
Protocol: 8, 5, 10, 1  
Filename: Bin1\_plateC2\_A7.fcs  
Split 1: Petrol shading  
Split 2: Green shading  
Split 3: Violet shading

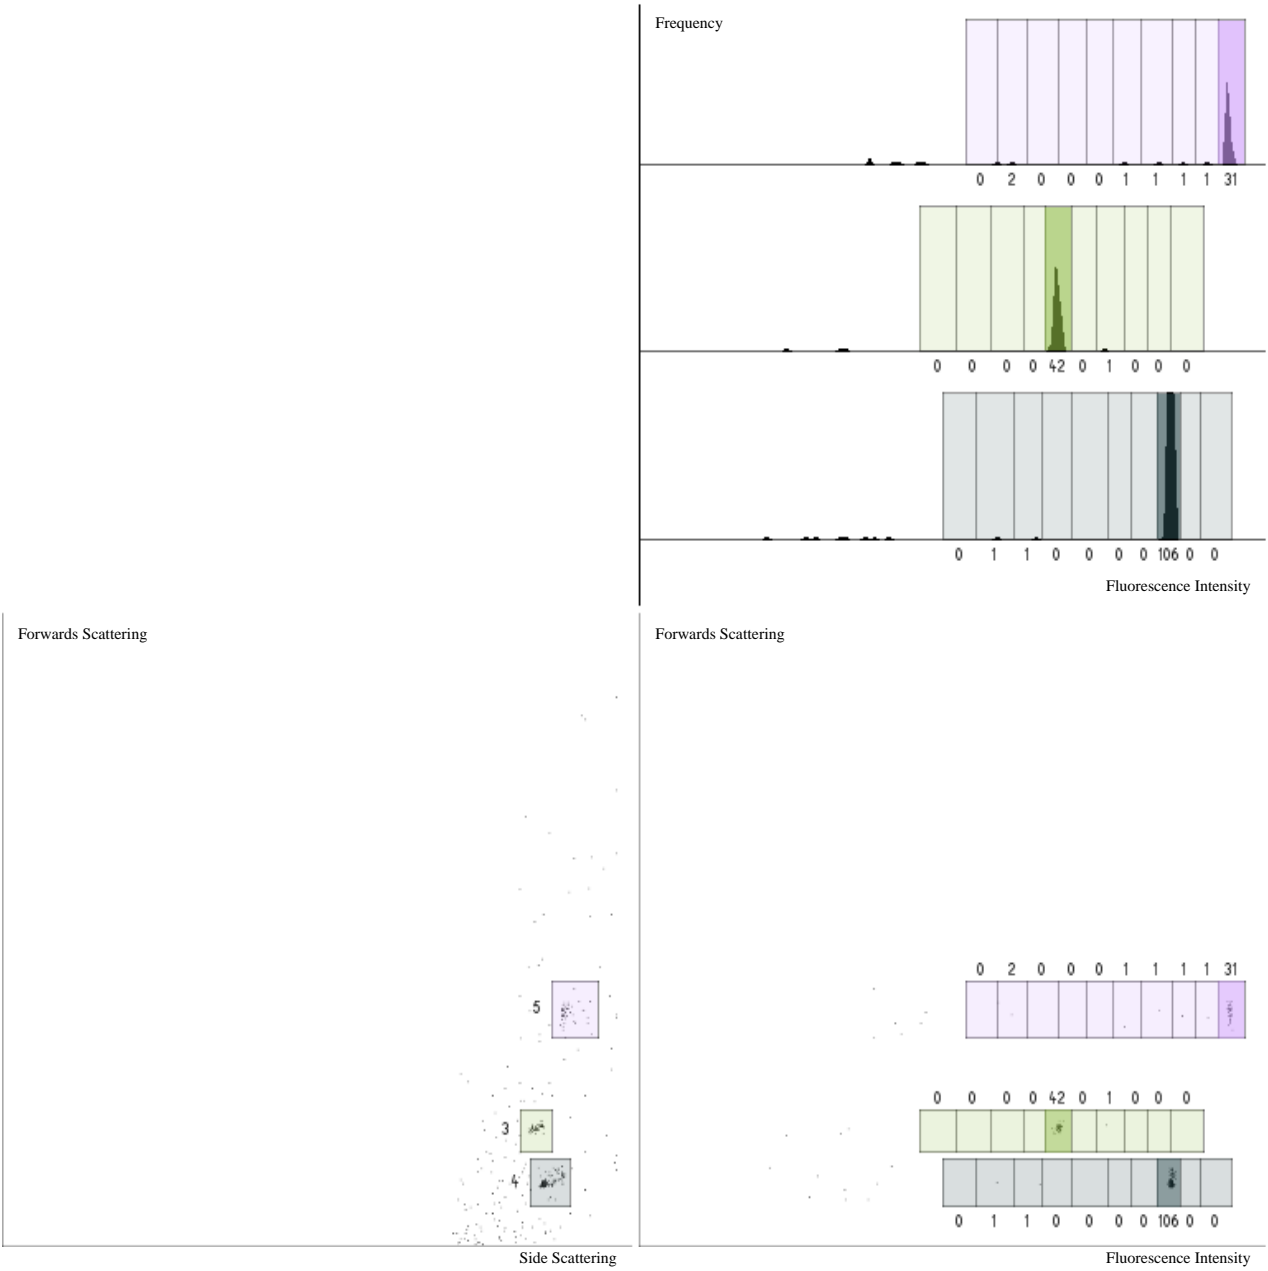

ANNEX 3: TAG DECONVOLUTION - BEAD 165

Passes flow sorting criteria: Yes  
Passes tag deconvolution criteria: No  
Included in protocol analysis: No  
Protocol: N/A  
Filename: Bin1\_plateC2\_A8.fcs  
Split 1: Petrol shading  
Split 2: Green shading  
Split 3: Violet shading

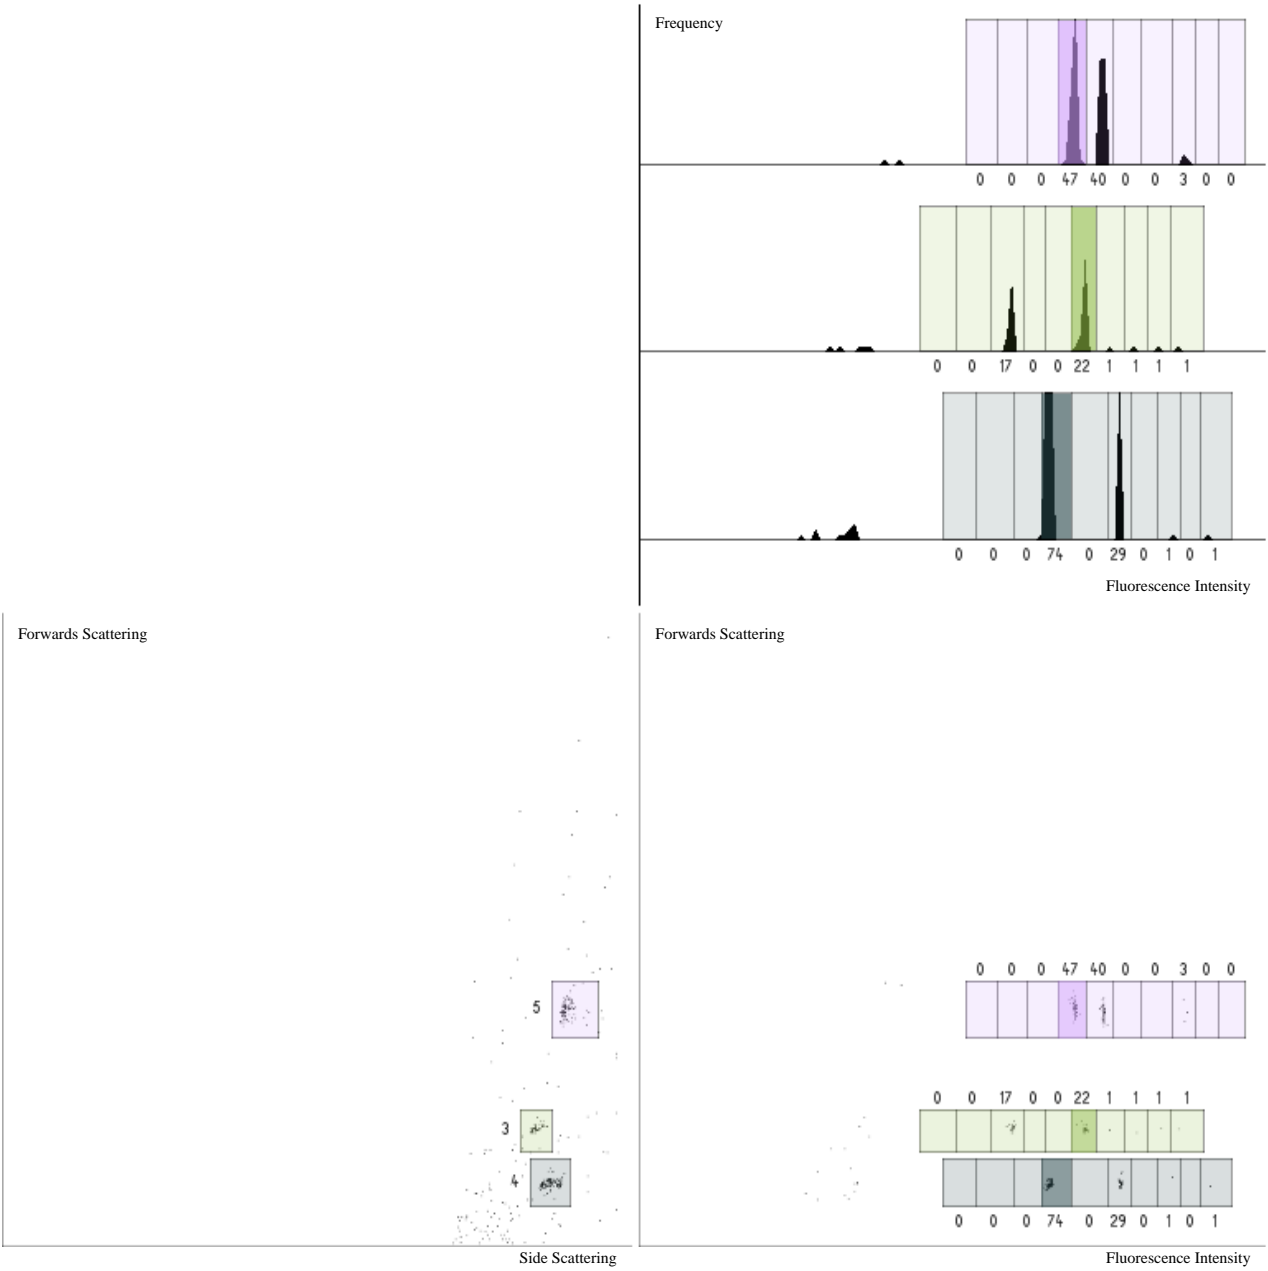

ANNEX 3: TAG DECONVOLUTION - BEAD 166

Passes flow sorting criteria: Yes  
Passes tag deconvolution criteria: Yes  
Included in protocol analysis: Yes  
Protocol: 1, 5, 2, 1  
Filename: Bin1\_plateC2\_A9.fcs  
Split 1: Petrol shading  
Split 2: Green shading  
Split 3: Violet shading

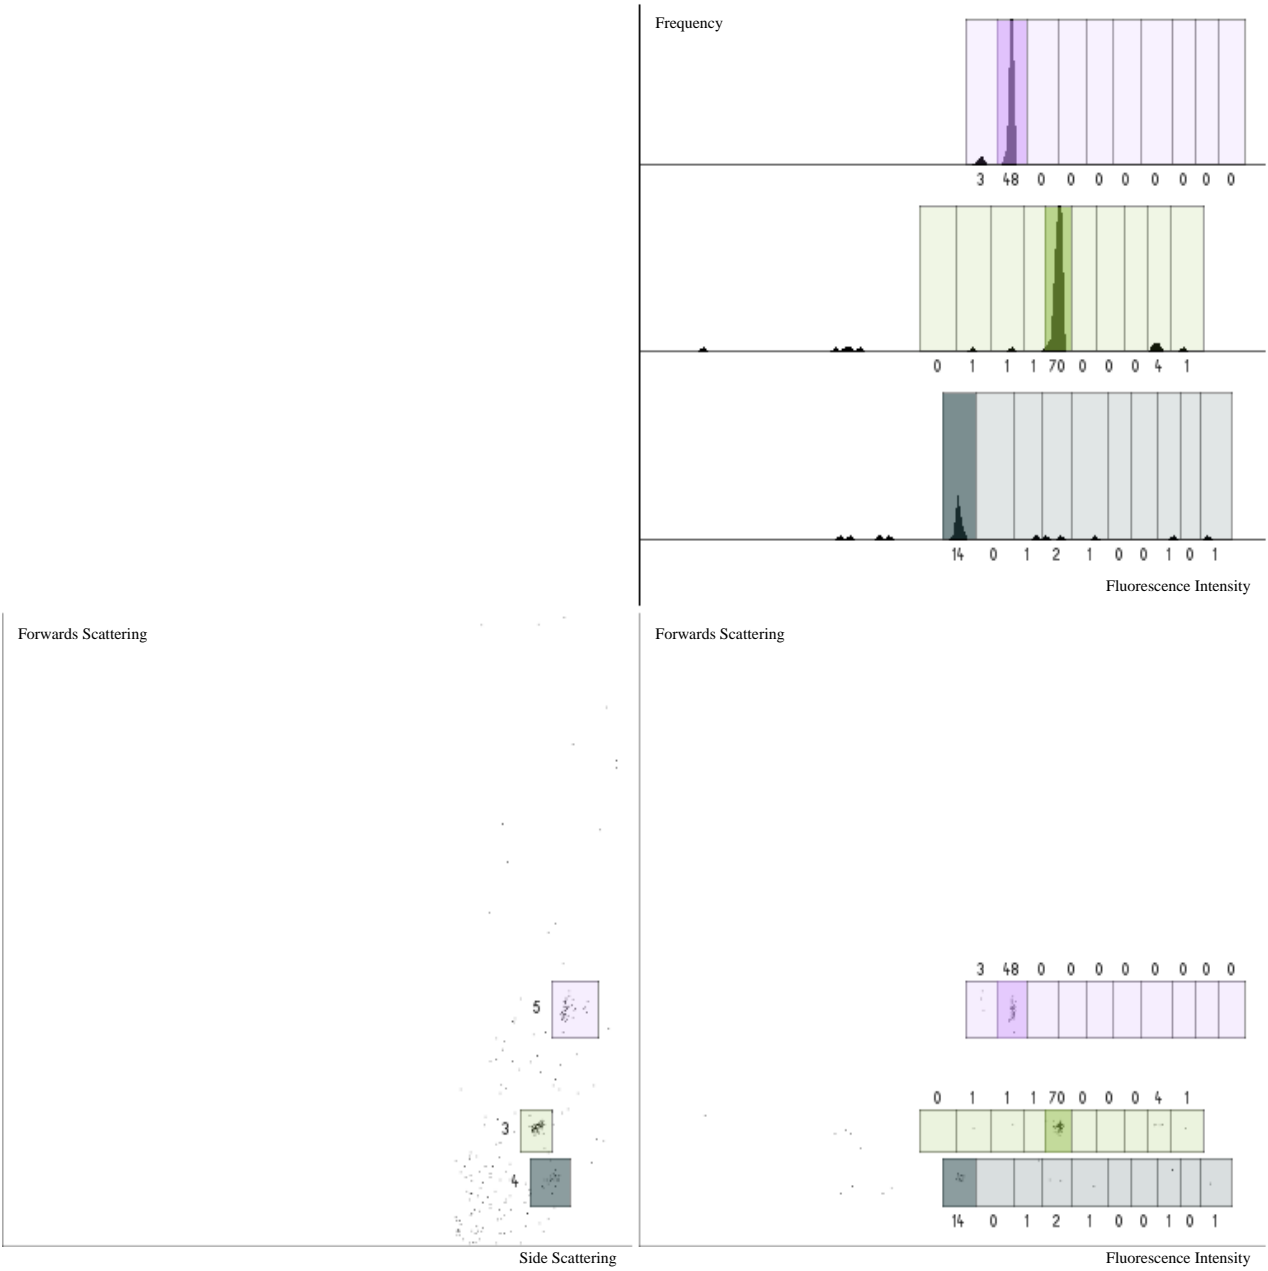



ANNEX 3: TAG DECONVOLUTION - BEAD 167

Passes flow sorting criteria: Yes  
Passes tag deconvolution criteria: Yes  
Included in protocol analysis: Yes  
Protocol: 5, 5, 5, 1  
Filename: Bin1\_plateC2\_A10.fcs  
Split 1: Petrol shading  
Split 2: Green shading  
Split 3: Violet shading

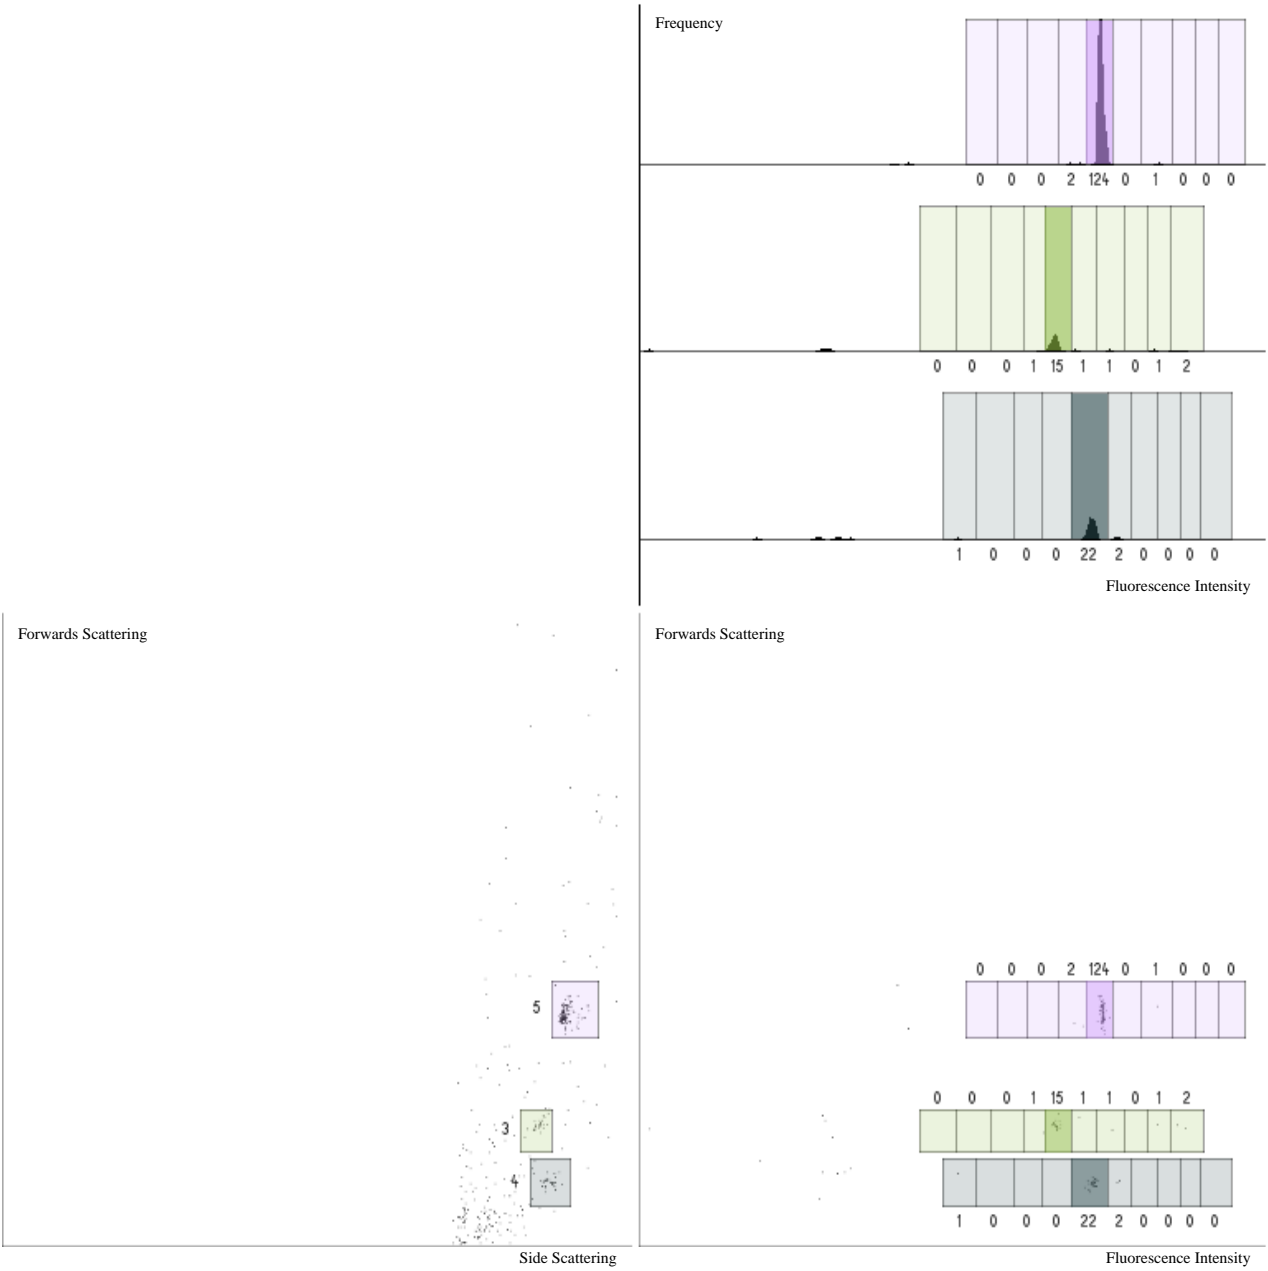

ANNEX 3: TAG DECONVOLUTION - BEAD 168

Passes flow sorting criteria: Yes  
Passes tag deconvolution criteria: No  
Included in protocol analysis: No  
Protocol: N/A  
Filename: Bin1\_plateC2\_A11.fcs  
Split 1: Petrol shading  
Split 2: Green shading  
Split 3: Violet shading

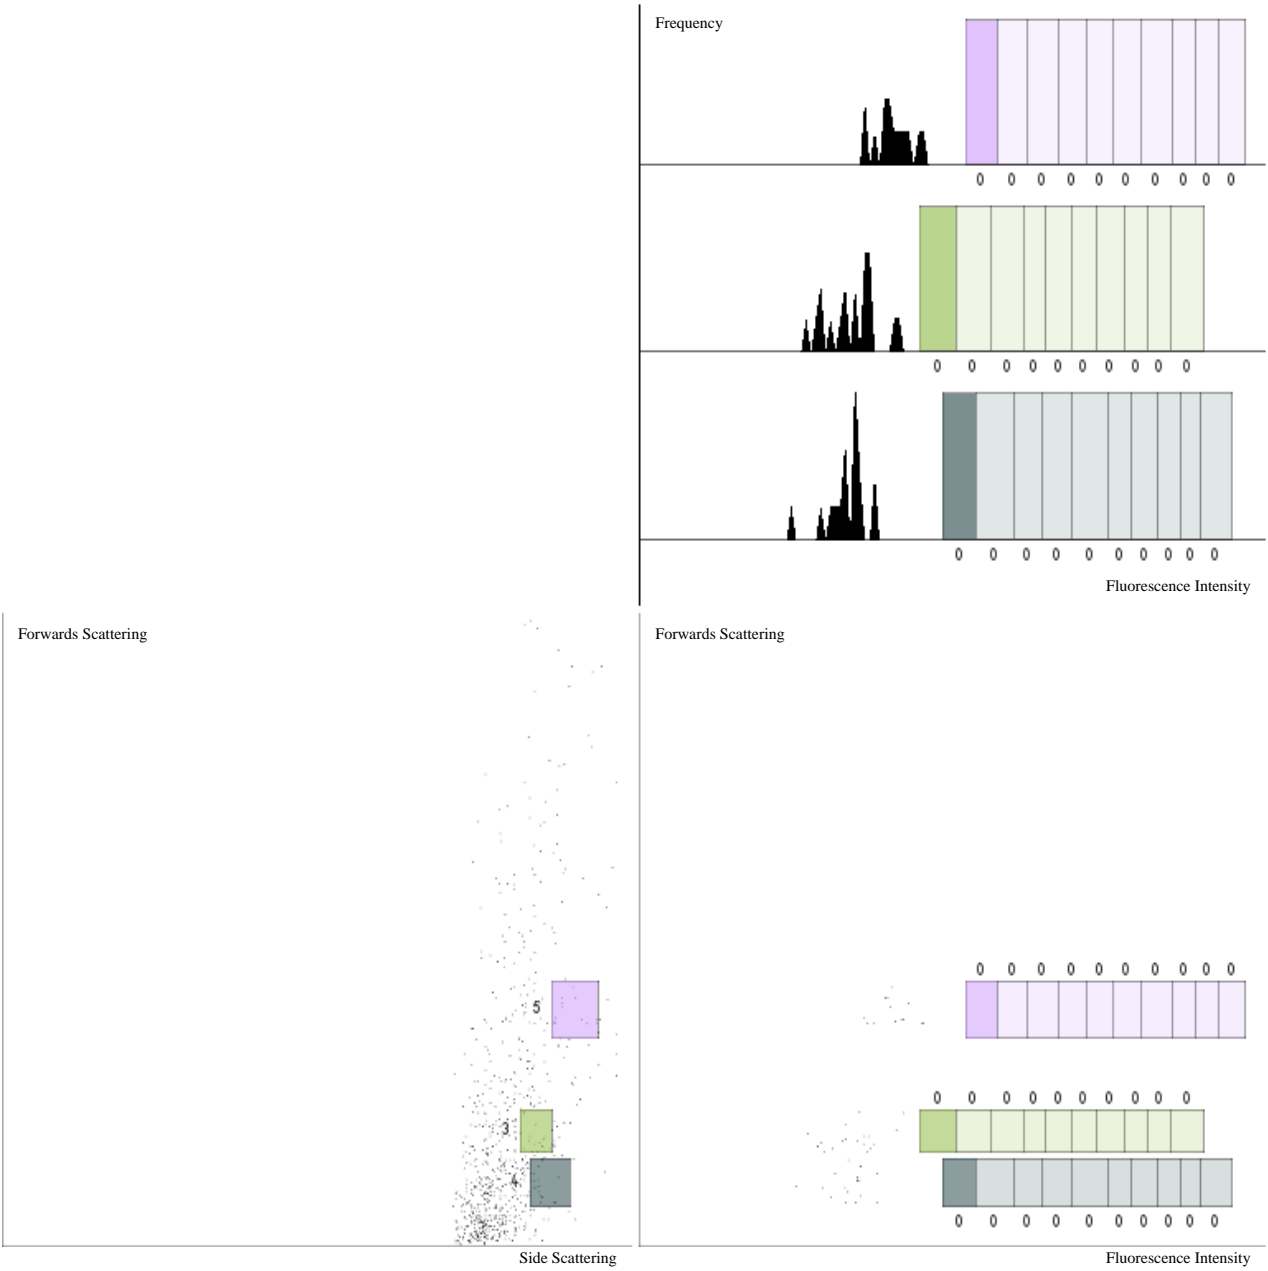

ANNEX 3: TAG DECONVOLUTION - BEAD 169

Passes flow sorting criteria: Yes  
Passes tag deconvolution criteria: Yes  
Included in protocol analysis: Yes  
Protocol: 7, 8, 10, 1  
Filename: Bin1\_plateC2\_A12.fcs  
Split 1: Petrol shading  
Split 2: Green shading  
Split 3: Violet shading

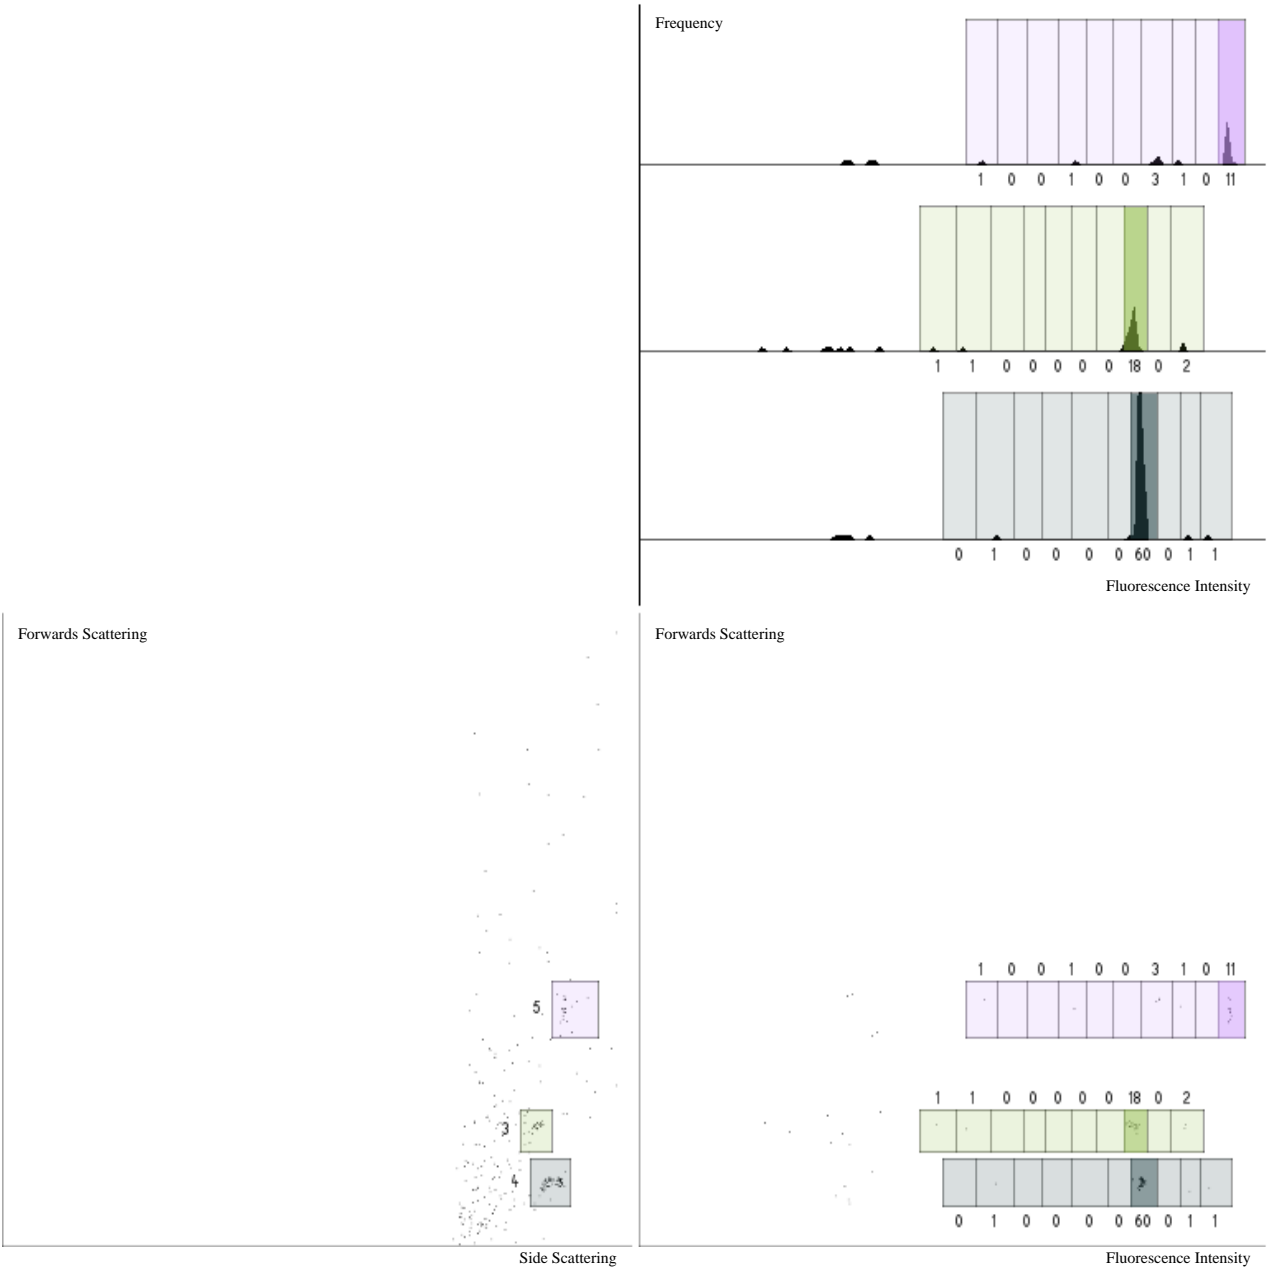

ANNEX 3: TAG DECONVOLUTION - BEAD 170

Passes flow sorting criteria: Yes  
Passes tag deconvolution criteria: Yes  
Included in protocol analysis: Yes  
Protocol: 8, 7, 9, 1  
Filename: Bin1\_plateC2\_B1.fcs  
Split 1: Petrol shading  
Split 2: Green shading  
Split 3: Violet shading

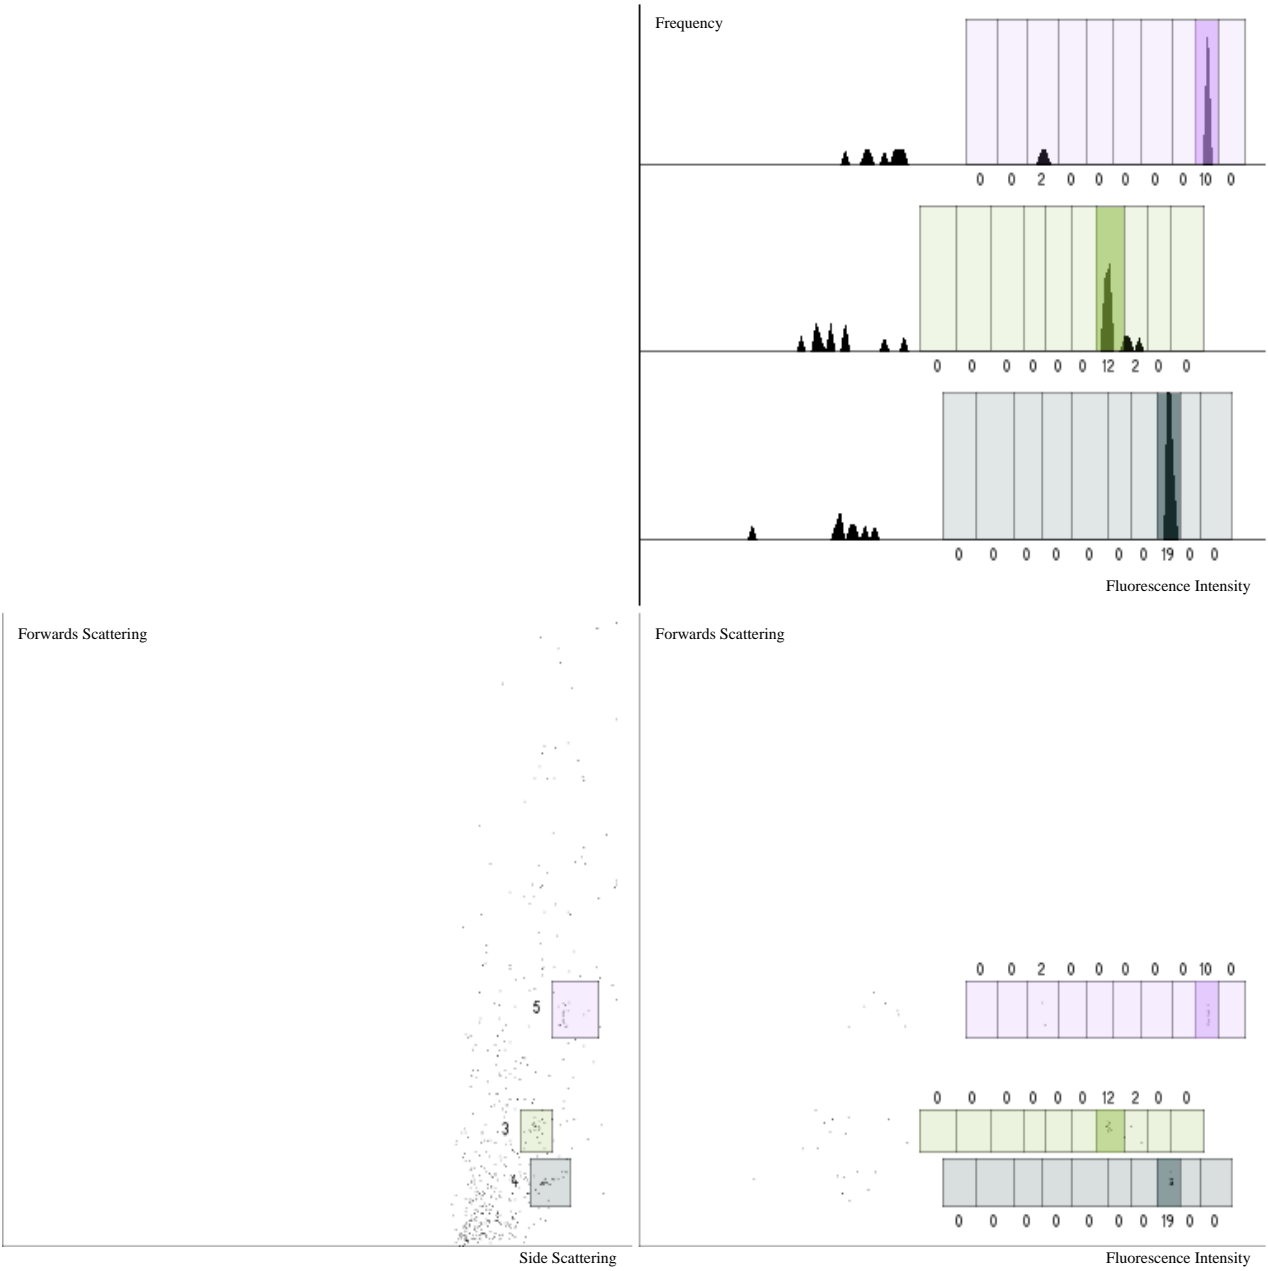

ANNEX 3: TAG DECONVOLUTION - BEAD 171

Passes flow sorting criteria: Yes  
Passes tag deconvolution criteria: Yes  
Included in protocol analysis: Yes  
Protocol: 1, 5, 2, 1  
Filename: Bin1\_plateC2\_B2.fcs  
Split 1: Petrol shading  
Split 2: Green shading  
Split 3: Violet shading

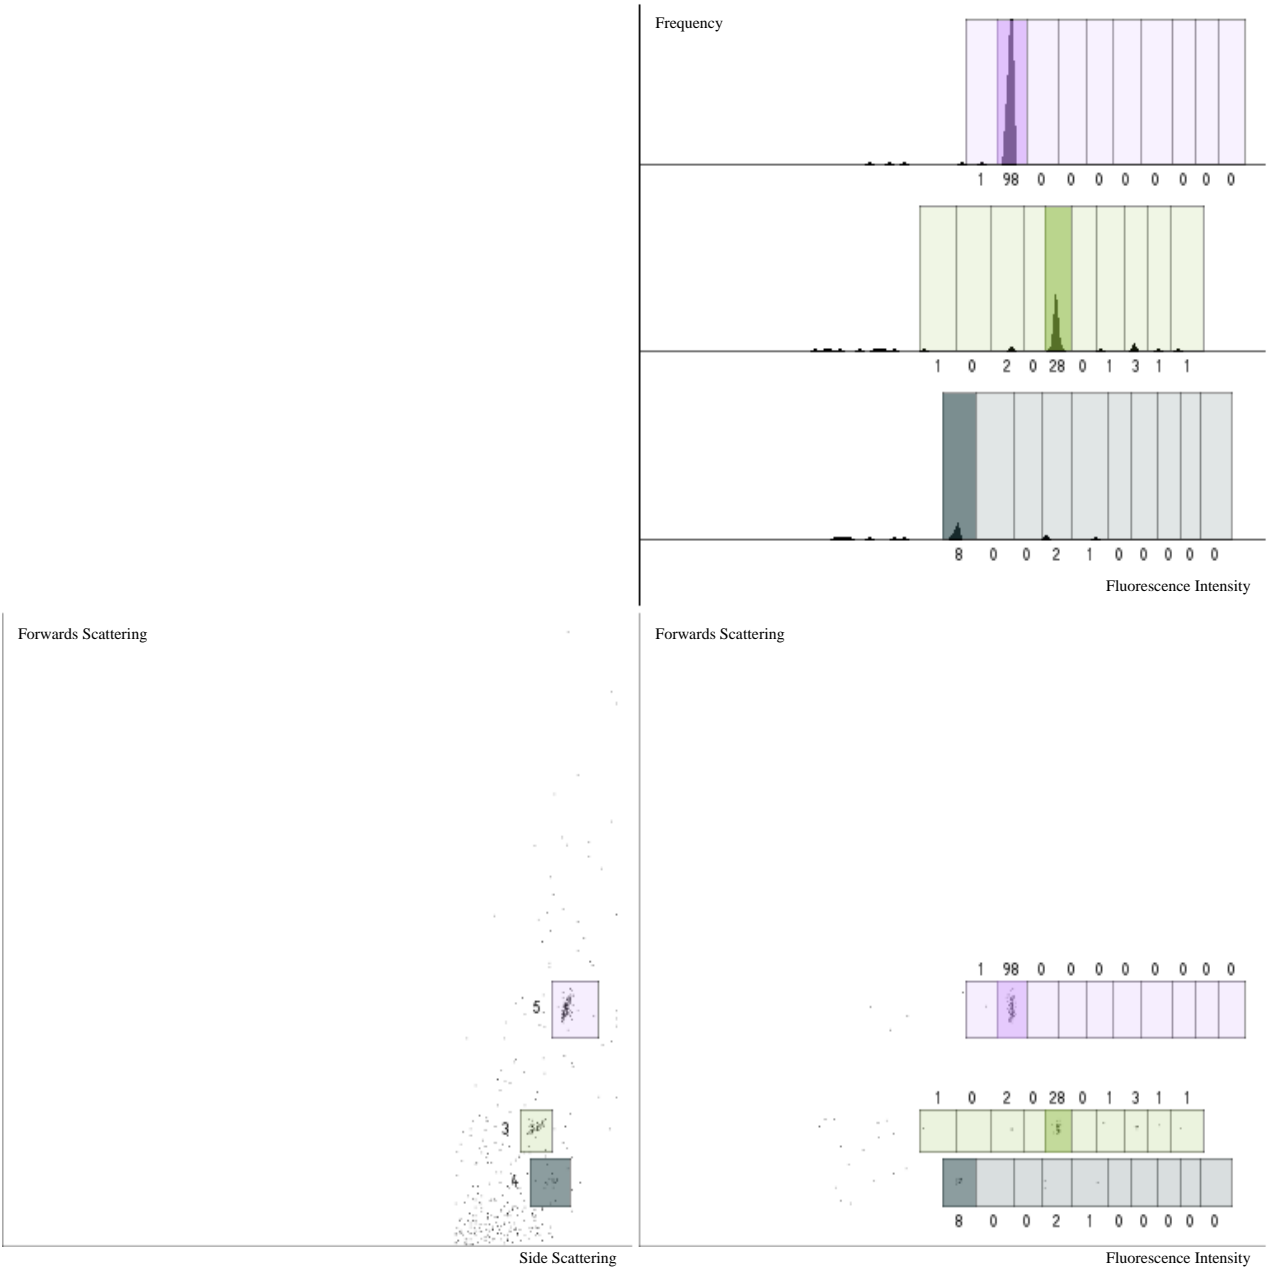

ANNEX 3: TAG DECONVOLUTION - BEAD 172

Passes flow sorting criteria: Yes  
Passes tag deconvolution criteria: Yes  
Included in protocol analysis: Yes  
Protocol: 9, 10, 10, 1  
Filename: Bin1\_plateC2\_B3.fcs  
Split 1: Petrol shading  
Split 2: Green shading  
Split 3: Violet shading

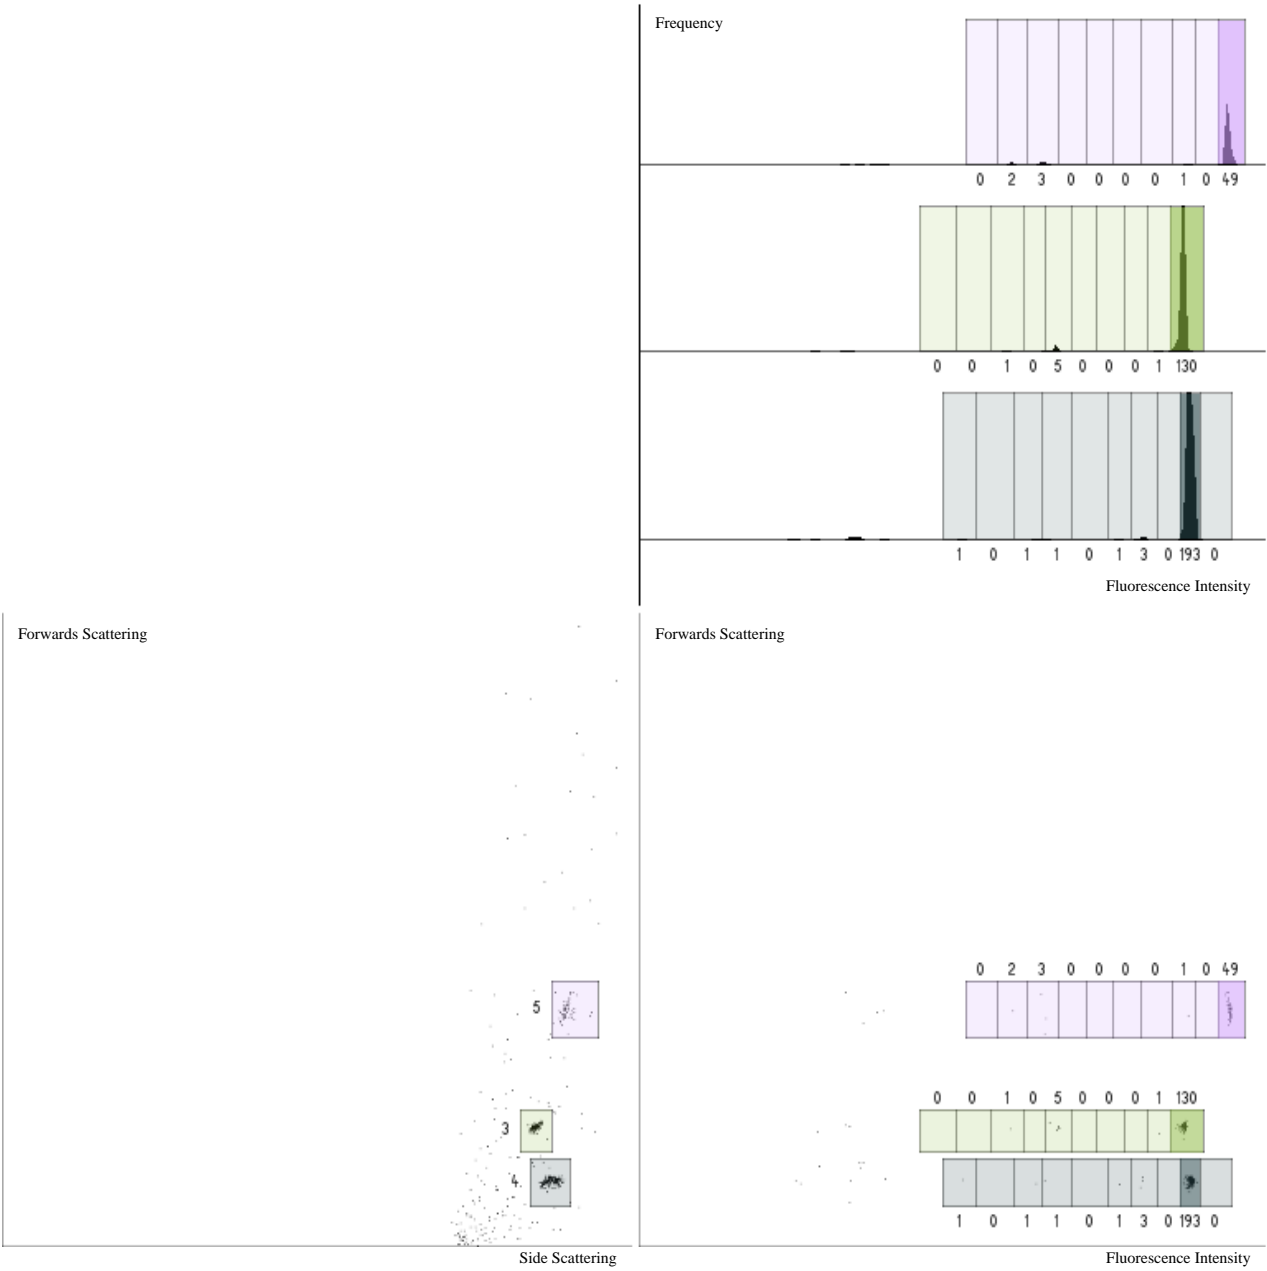

ANNEX 3: TAG DECONVOLUTION - BEAD 173

Passes flow sorting criteria: Yes  
Passes tag deconvolution criteria: Yes  
Included in protocol analysis: Yes  
Protocol: 5, 9, 5, 1  
Filename: Bin1\_plateC2\_B4.fcs  
Split 1: Petrol shading  
Split 2: Green shading  
Split 3: Violet shading

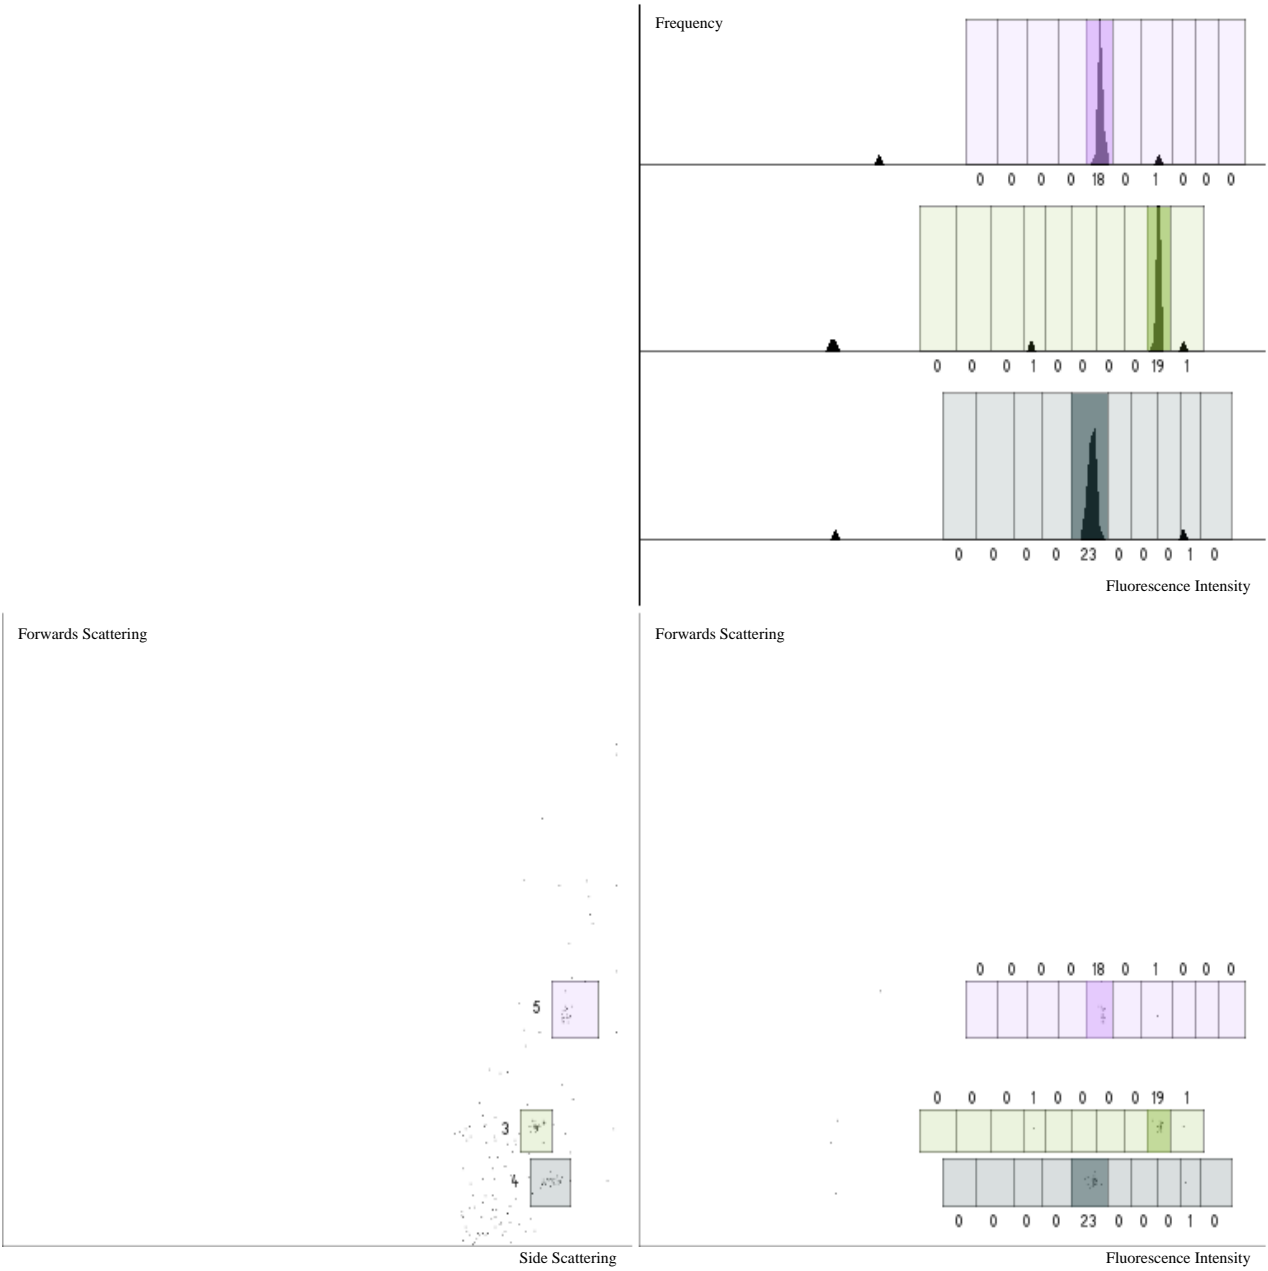

ANNEX 3: TAG DECONVOLUTION - BEAD 174

Passes flow sorting criteria: Yes  
Passes tag deconvolution criteria: Yes  
Included in protocol analysis: Yes  
Protocol: 1, 5, 7, 1  
Filename: Bin1\_plateC2\_B5.fcs  
Split 1: Petrol shading  
Split 2: Green shading  
Split 3: Violet shading

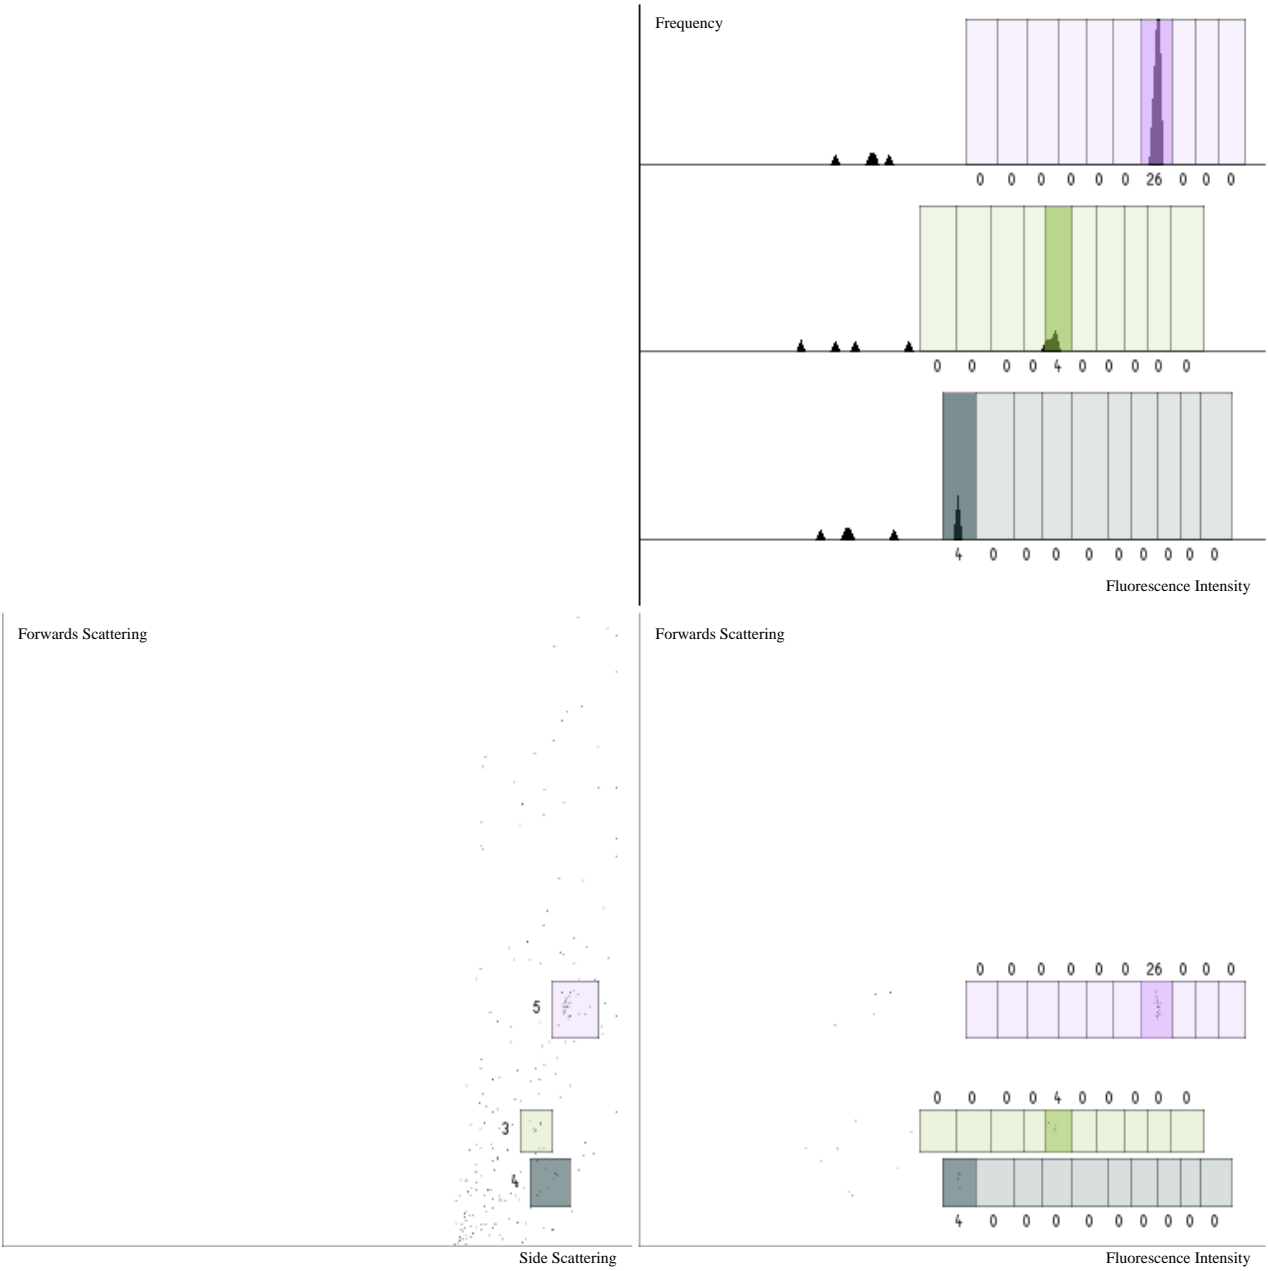



ANNEX 3: TAG DECONVOLUTION - BEAD 175

Passes flow sorting criteria: Yes  
Passes tag deconvolution criteria: Yes  
Included in protocol analysis: Yes  
Protocol: 4, 6, 5, 1  
Filename: Bin1\_plateC2\_B6.fcs  
Split 1: Petrol shading  
Split 2: Green shading  
Split 3: Violet shading

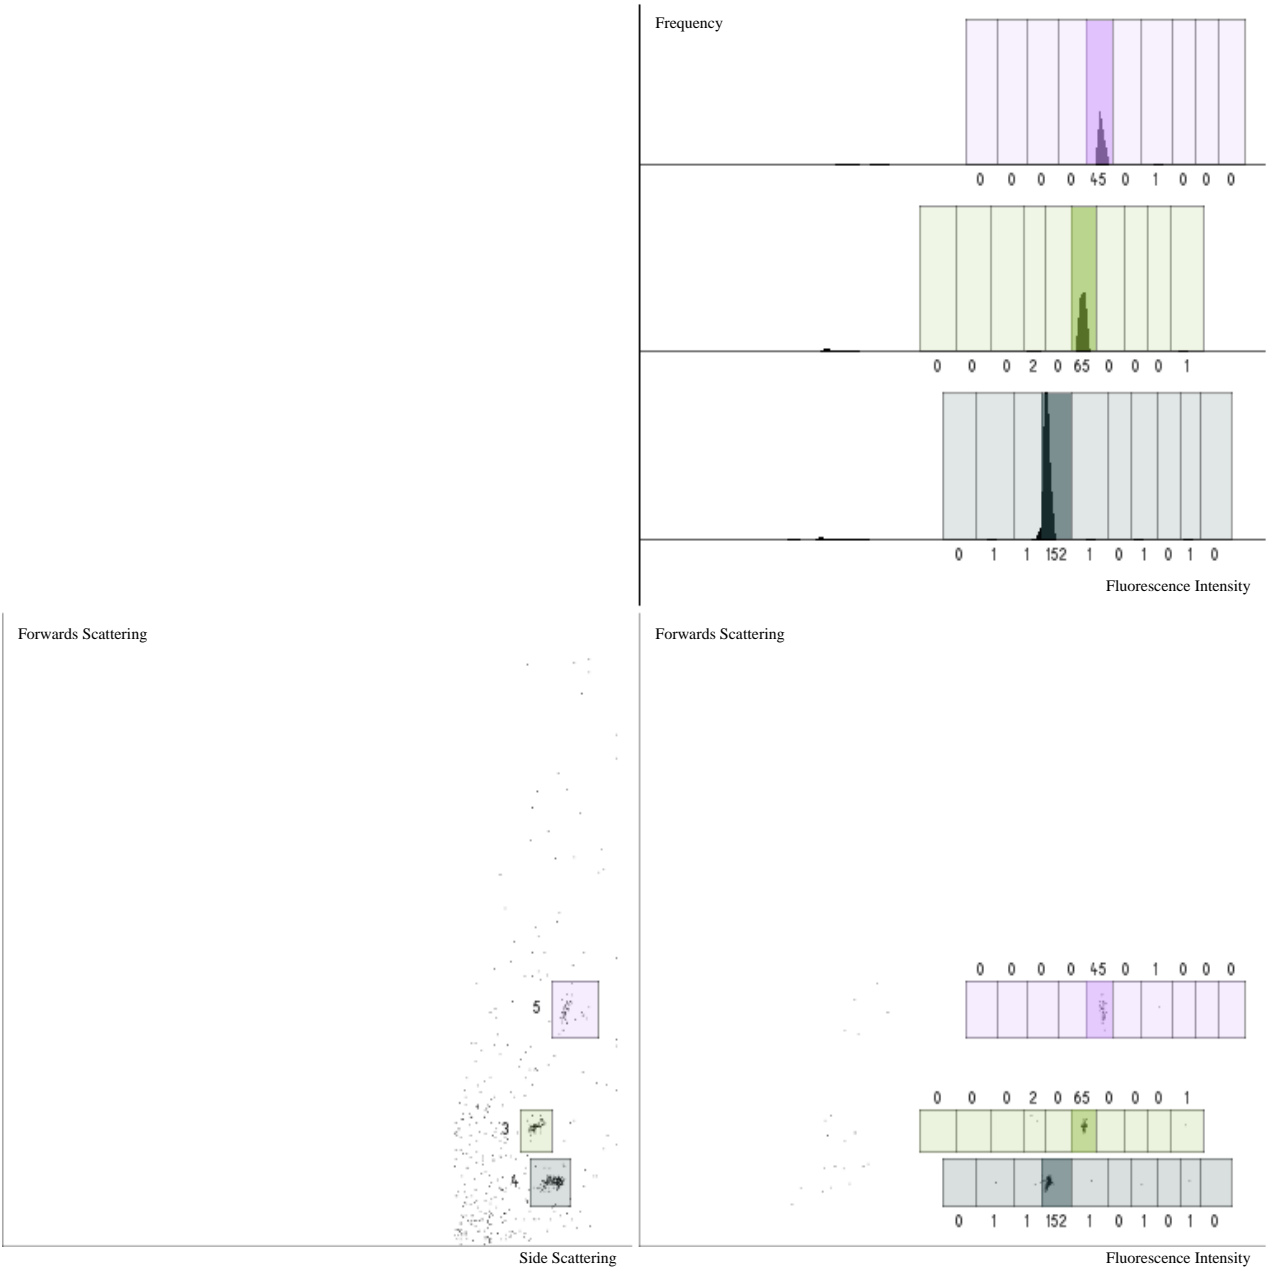

ANNEX 3: TAG DECONVOLUTION - BEAD 176

Passes flow sorting criteria: Yes  
Passes tag deconvolution criteria: Yes  
Included in protocol analysis: Yes  
Protocol: 6, 7, 5, 1  
Filename: Bin1\_plateC2\_B7.fcs  
Split 1: Petrol shading  
Split 2: Green shading  
Split 3: Violet shading

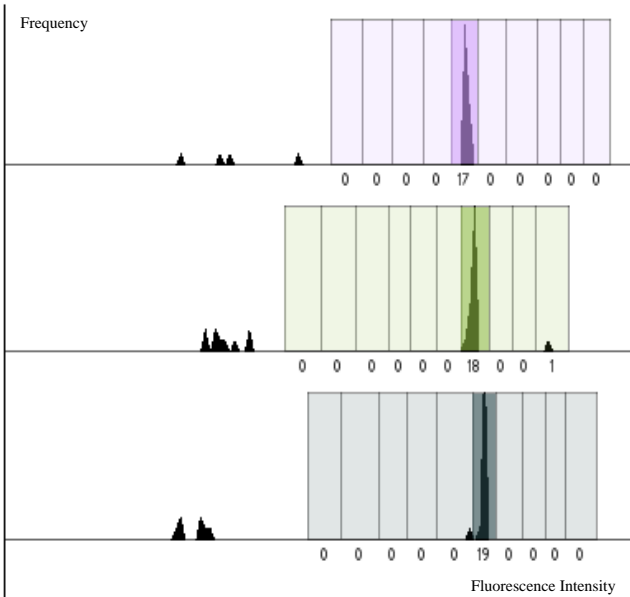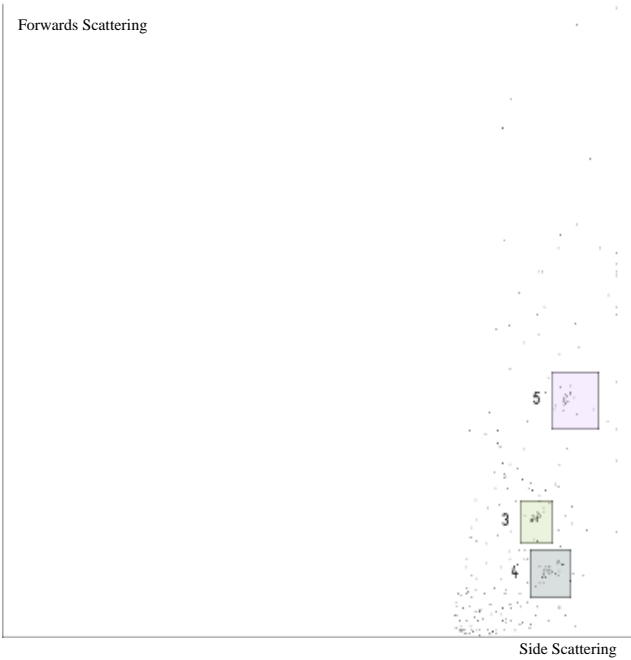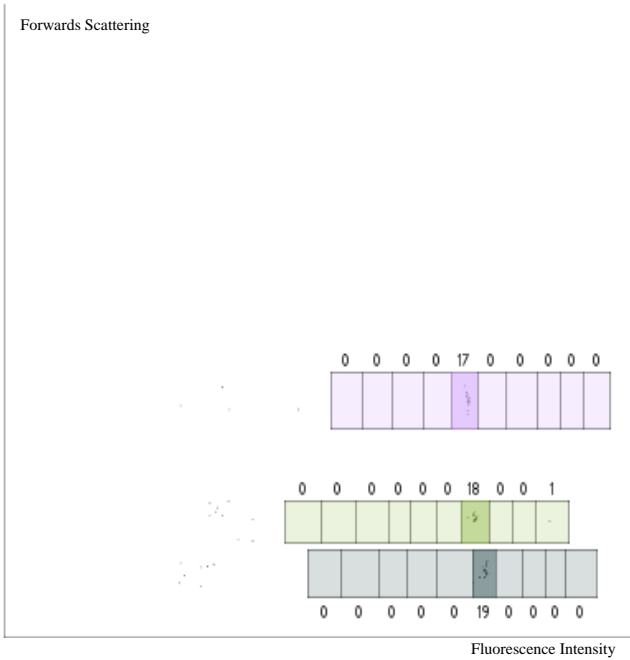

ANNEX 3: TAG DECONVOLUTION - BEAD 177

Passes flow sorting criteria: Yes  
Passes tag deconvolution criteria: No  
Included in protocol analysis: No  
Protocol: N/A  
Filename: Bin1\_plateC2\_B8.fcs  
Split 1: Petrol shading  
Split 2: Green shading  
Split 3: Violet shading

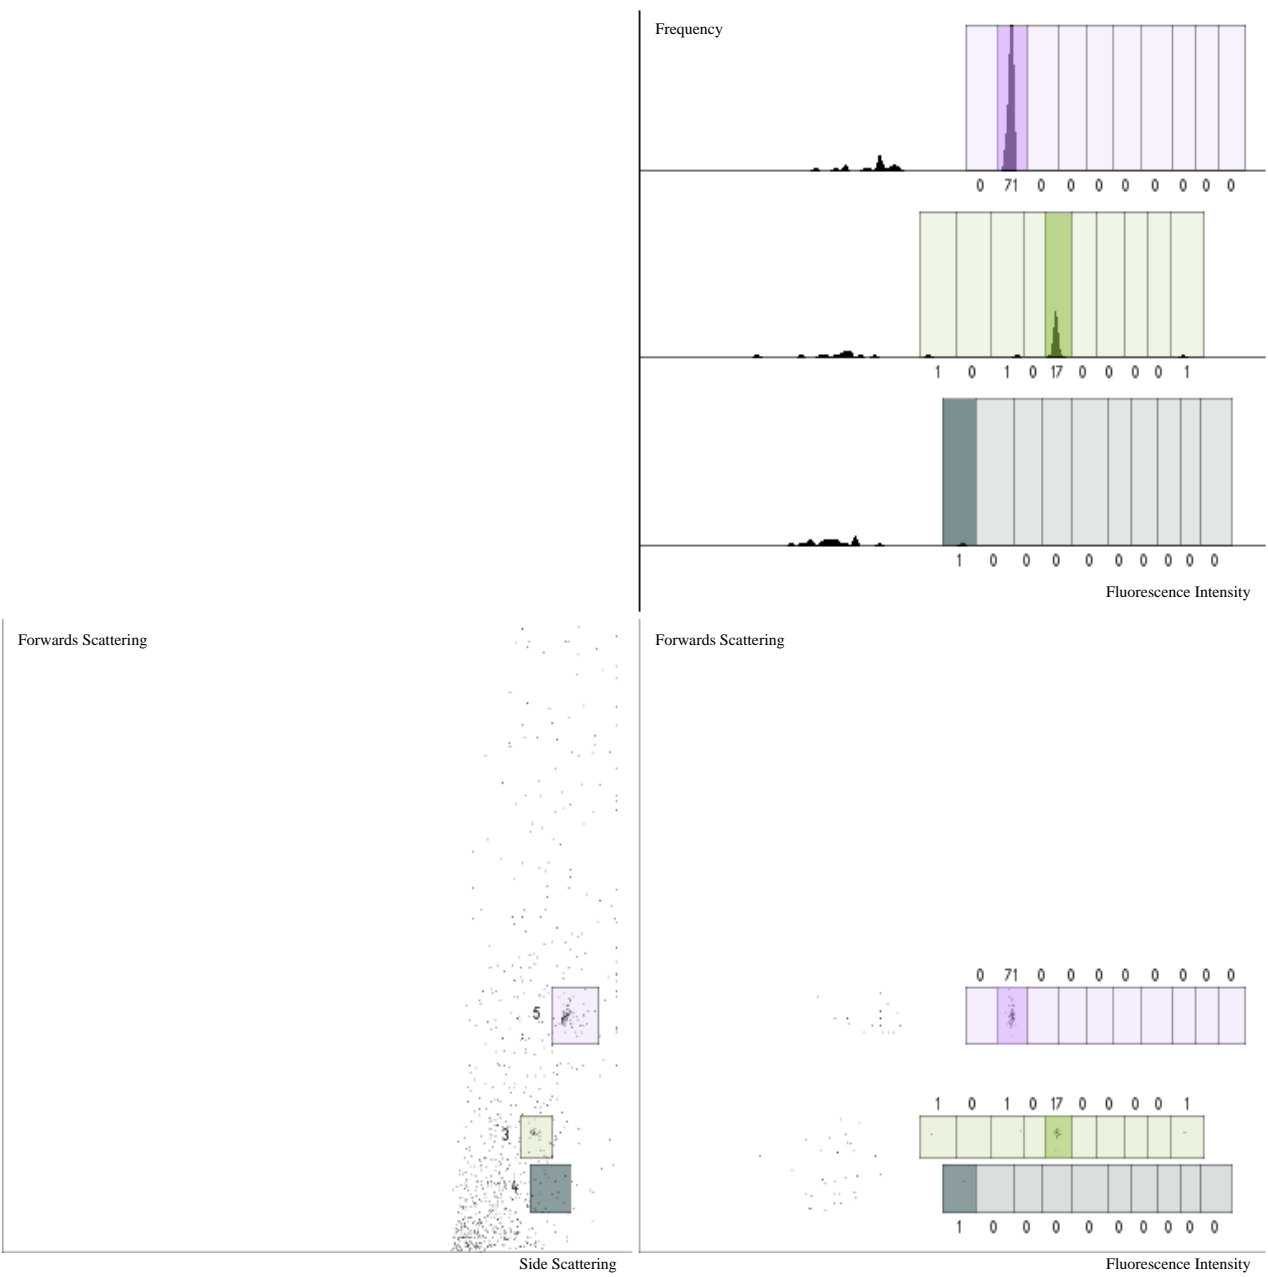

ANNEX 3: TAG DECONVOLUTION - BEAD 178

Passes flow sorting criteria: Yes  
Passes tag deconvolution criteria: Yes  
Included in protocol analysis: Yes  
Protocol: 4, 6, 1, 1  
Filename: Bin1\_plateC2\_B9.fcs  
Split 1: Petrol shading  
Split 2: Green shading  
Split 3: Violet shading

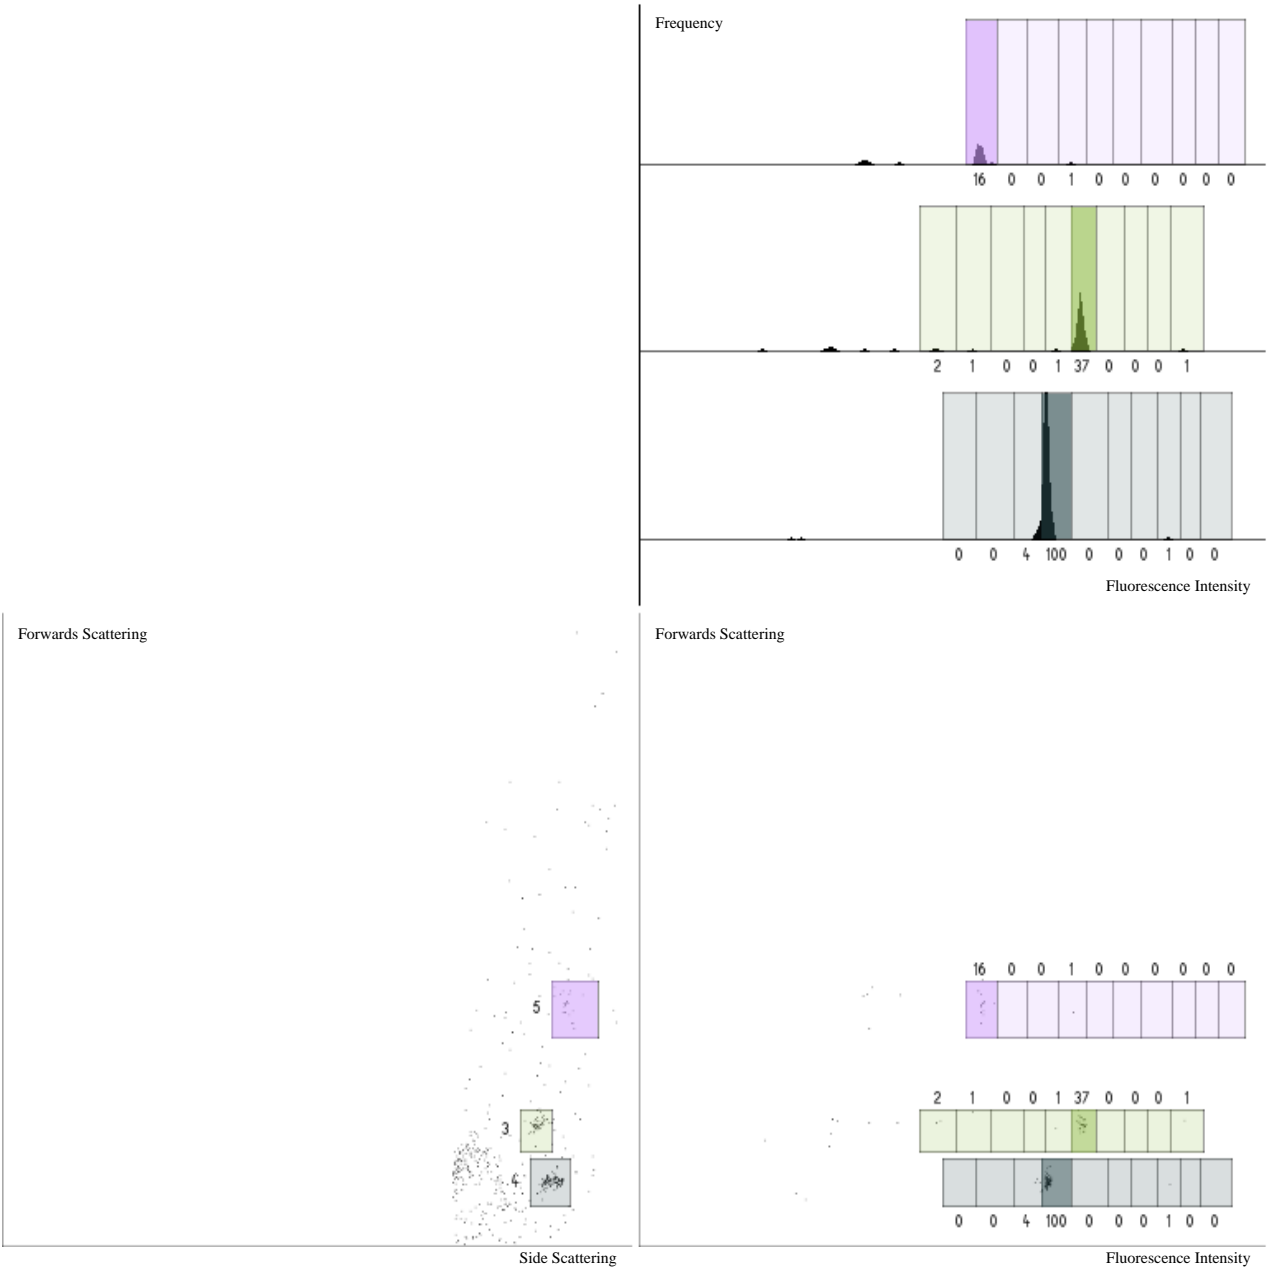

ANNEX 3: TAG DECONVOLUTION - BEAD 179

Passes flow sorting criteria: Yes  
Passes tag deconvolution criteria: Yes  
Included in protocol analysis: Yes  
Protocol: 6, 5, 6, 1  
Filename: Bin1\_plateC2\_B10.fcs  
Split 1: Petrol shading  
Split 2: Green shading  
Split 3: Violet shading

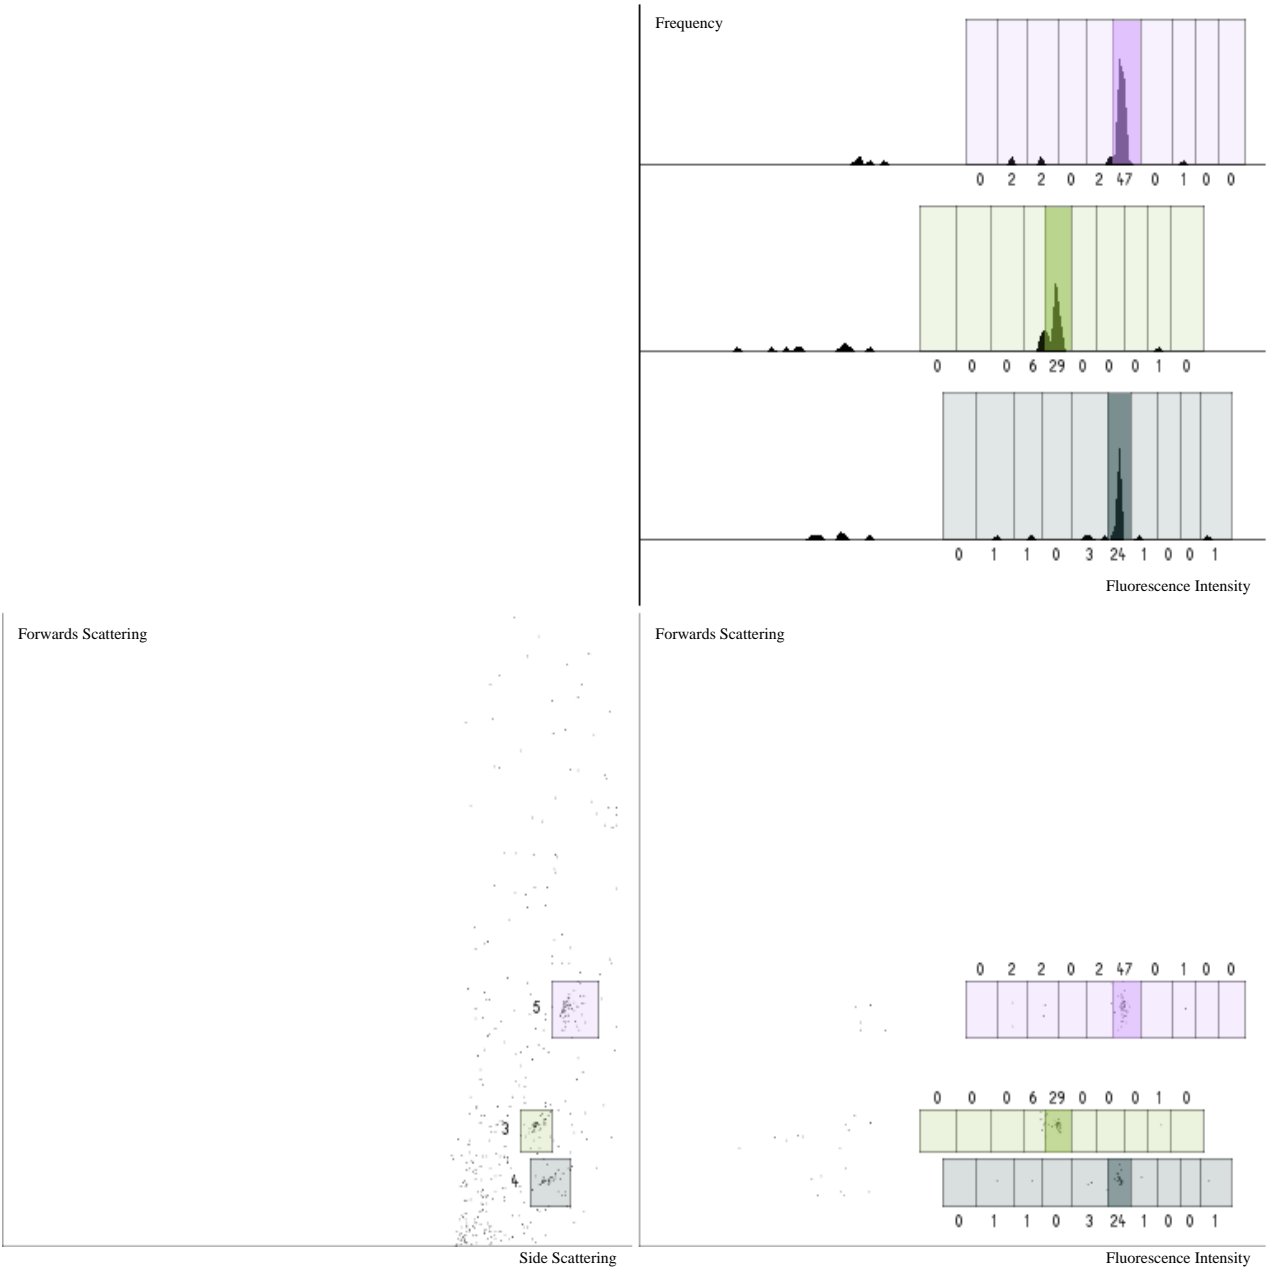

ANNEX 3: TAG DECONVOLUTION - BEAD 180

Passes flow sorting criteria: Yes  
Passes tag deconvolution criteria: Yes  
Included in protocol analysis: Yes  
Protocol: 5, 10, 5, 1  
Filename: Bin1\_plateC2\_B11.fcs  
Split 1: Petrol shading  
Split 2: Green shading  
Split 3: Violet shading

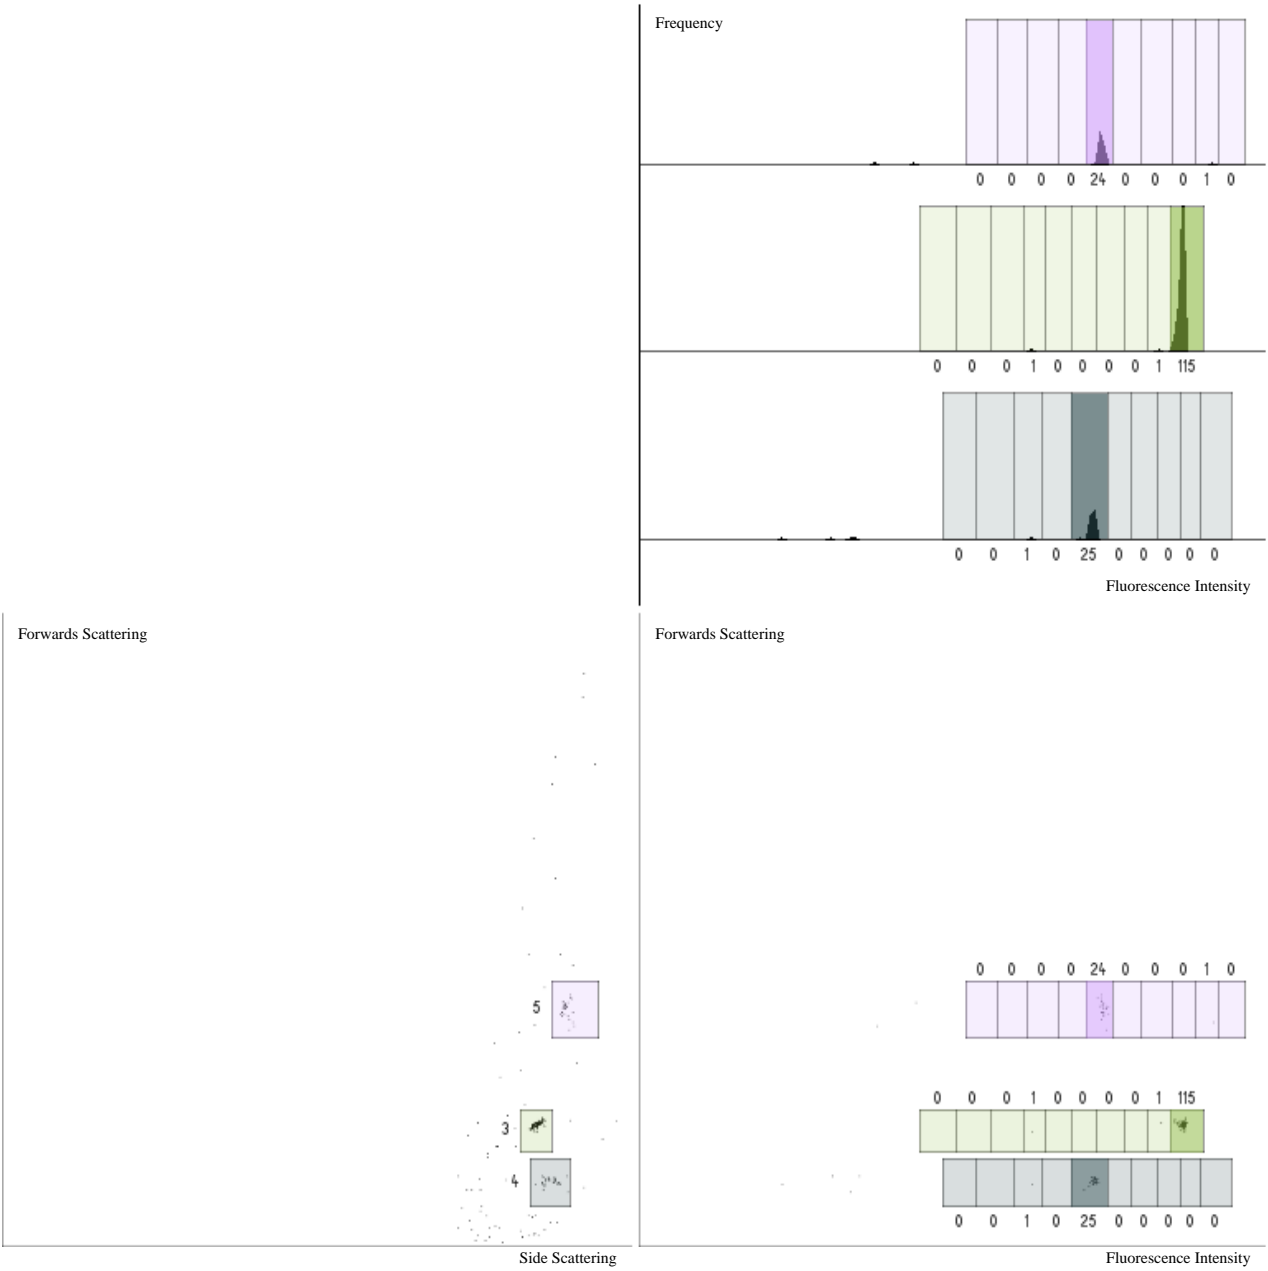

ANNEX 3: TAG DECONVOLUTION - BEAD 181

Passes flow sorting criteria: Yes  
Passes tag deconvolution criteria: Yes  
Included in protocol analysis: Yes  
Protocol: 1, 3, 10, 1  
Filename: Bin1\_plateC2\_B12.fcs  
Split 1: Petrol shading  
Split 2: Green shading  
Split 3: Violet shading

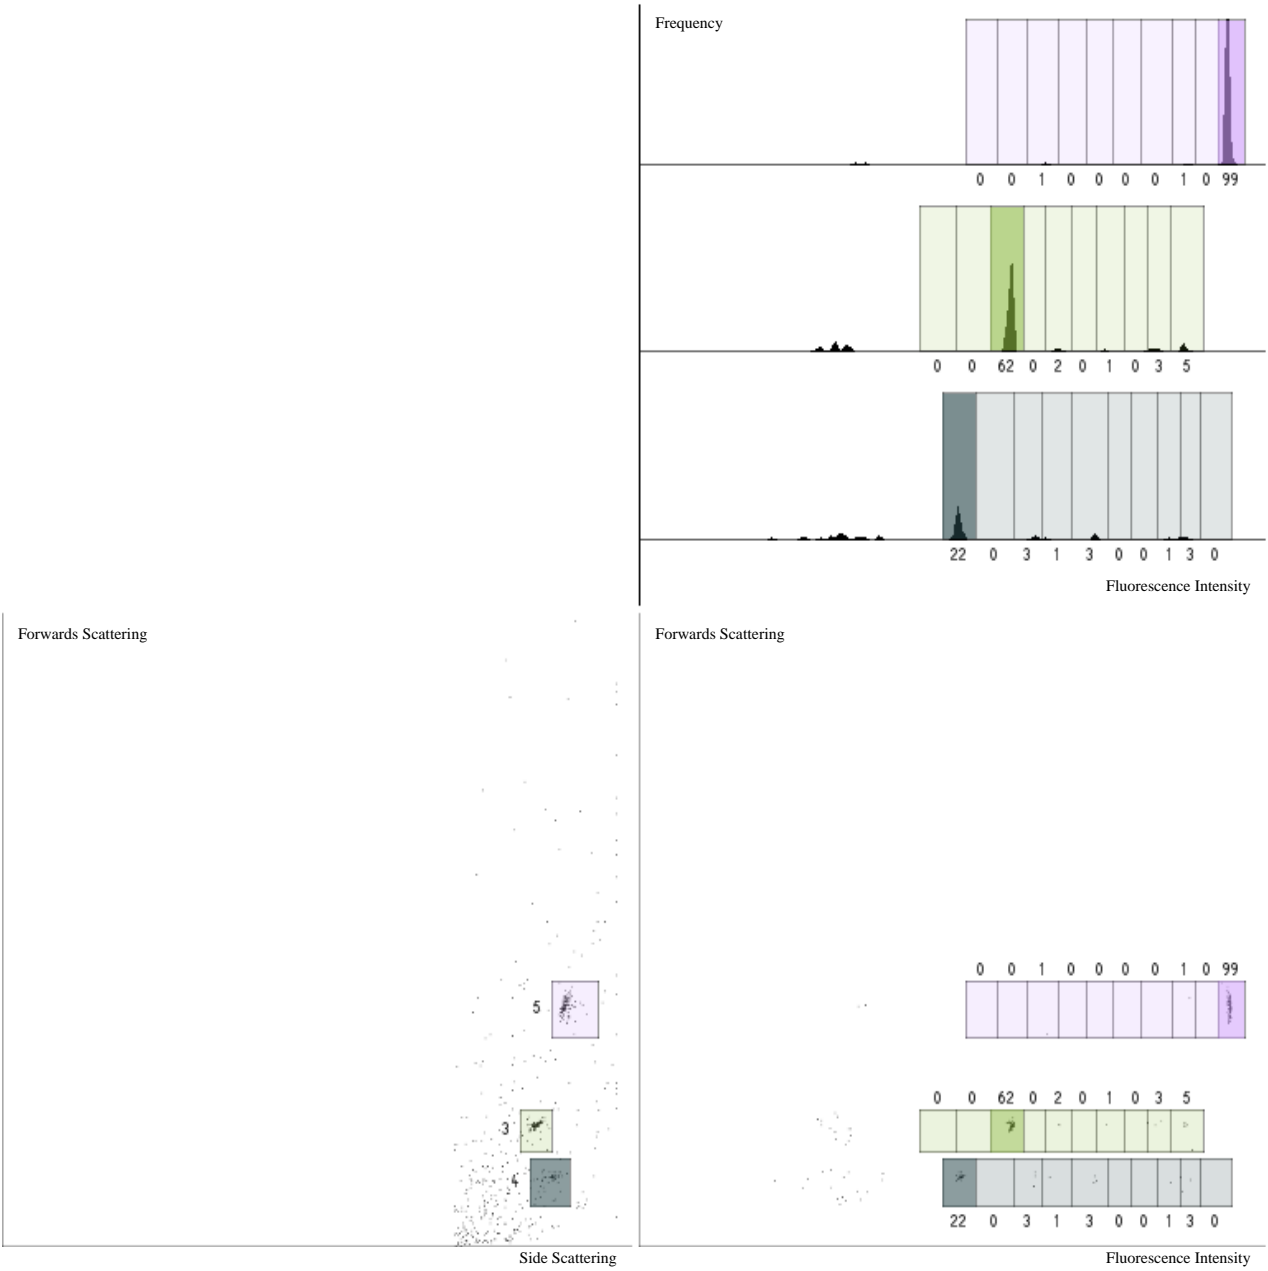

ANNEX 3: TAG DECONVOLUTION - BEAD 182

Passes flow sorting criteria: Yes  
Passes tag deconvolution criteria: Yes  
Included in protocol analysis: Yes  
Protocol: 6, 5, 3, 1  
Filename: Bin1\_plateC2\_C1.fcs  
Split 1: Petrol shading  
Split 2: Green shading  
Split 3: Violet shading

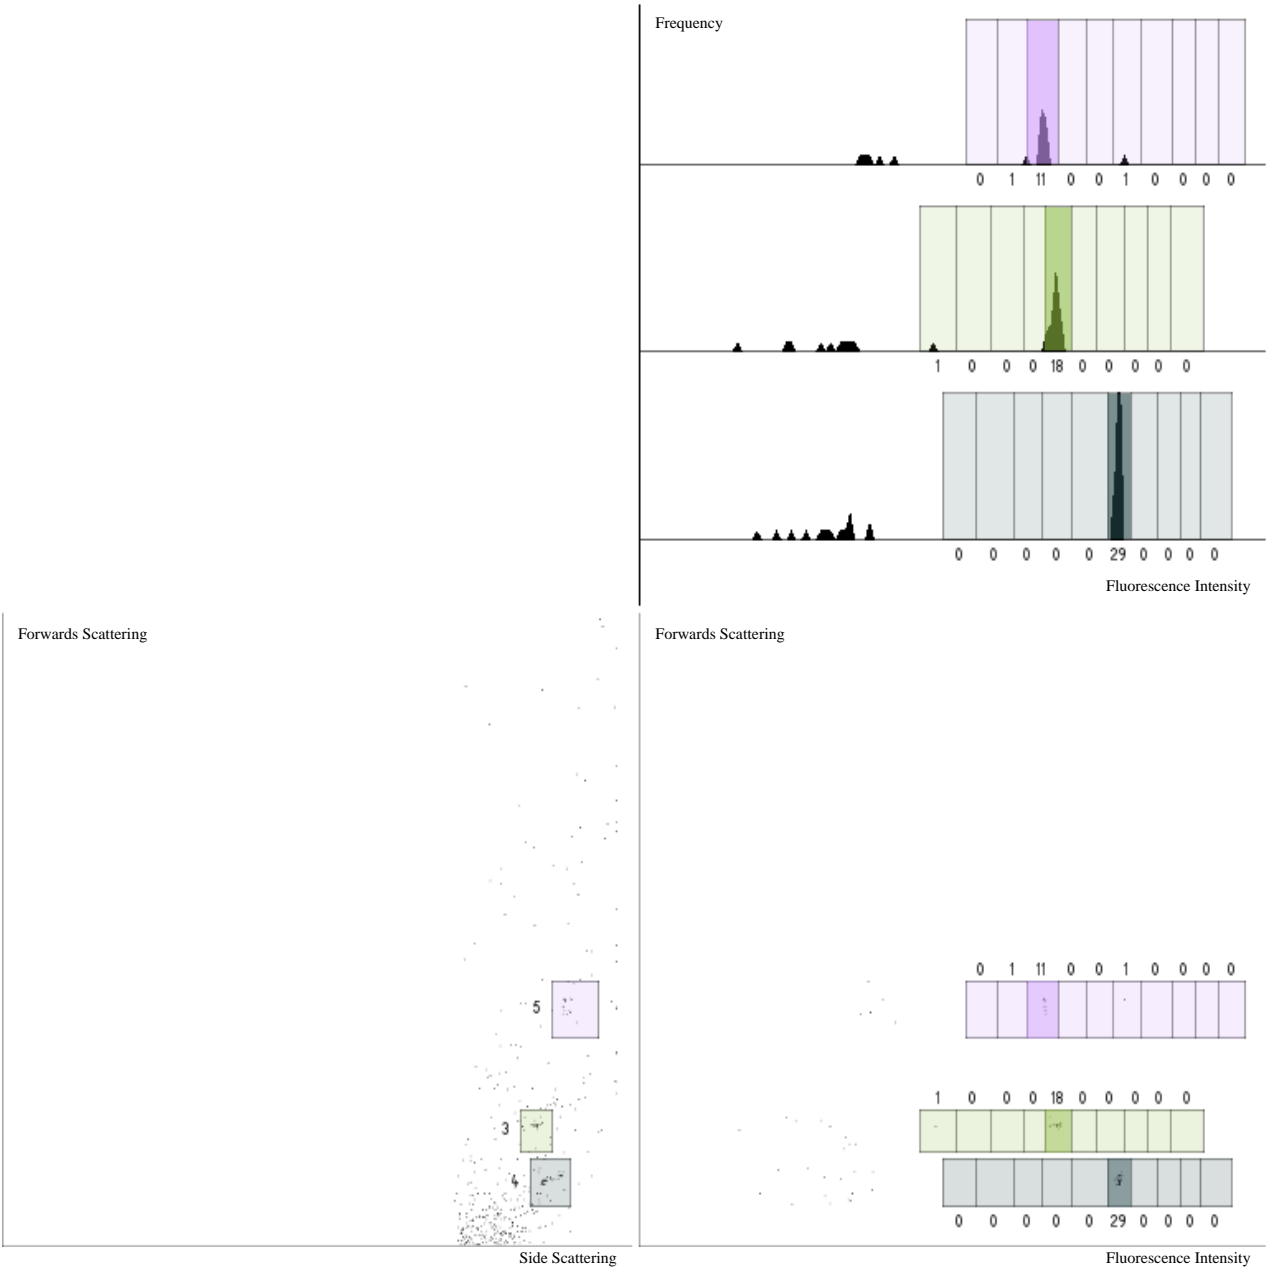



ANNEX 3: TAG DECONVOLUTION - BEAD 183

Passes flow sorting criteria: Yes  
Passes tag deconvolution criteria: Yes  
Included in protocol analysis: Yes  
Protocol: 4, 9, 5, 1  
Filename: Bin1\_plateC2\_C4.fcs  
Split 1: Petrol shading  
Split 2: Green shading  
Split 3: Violet shading

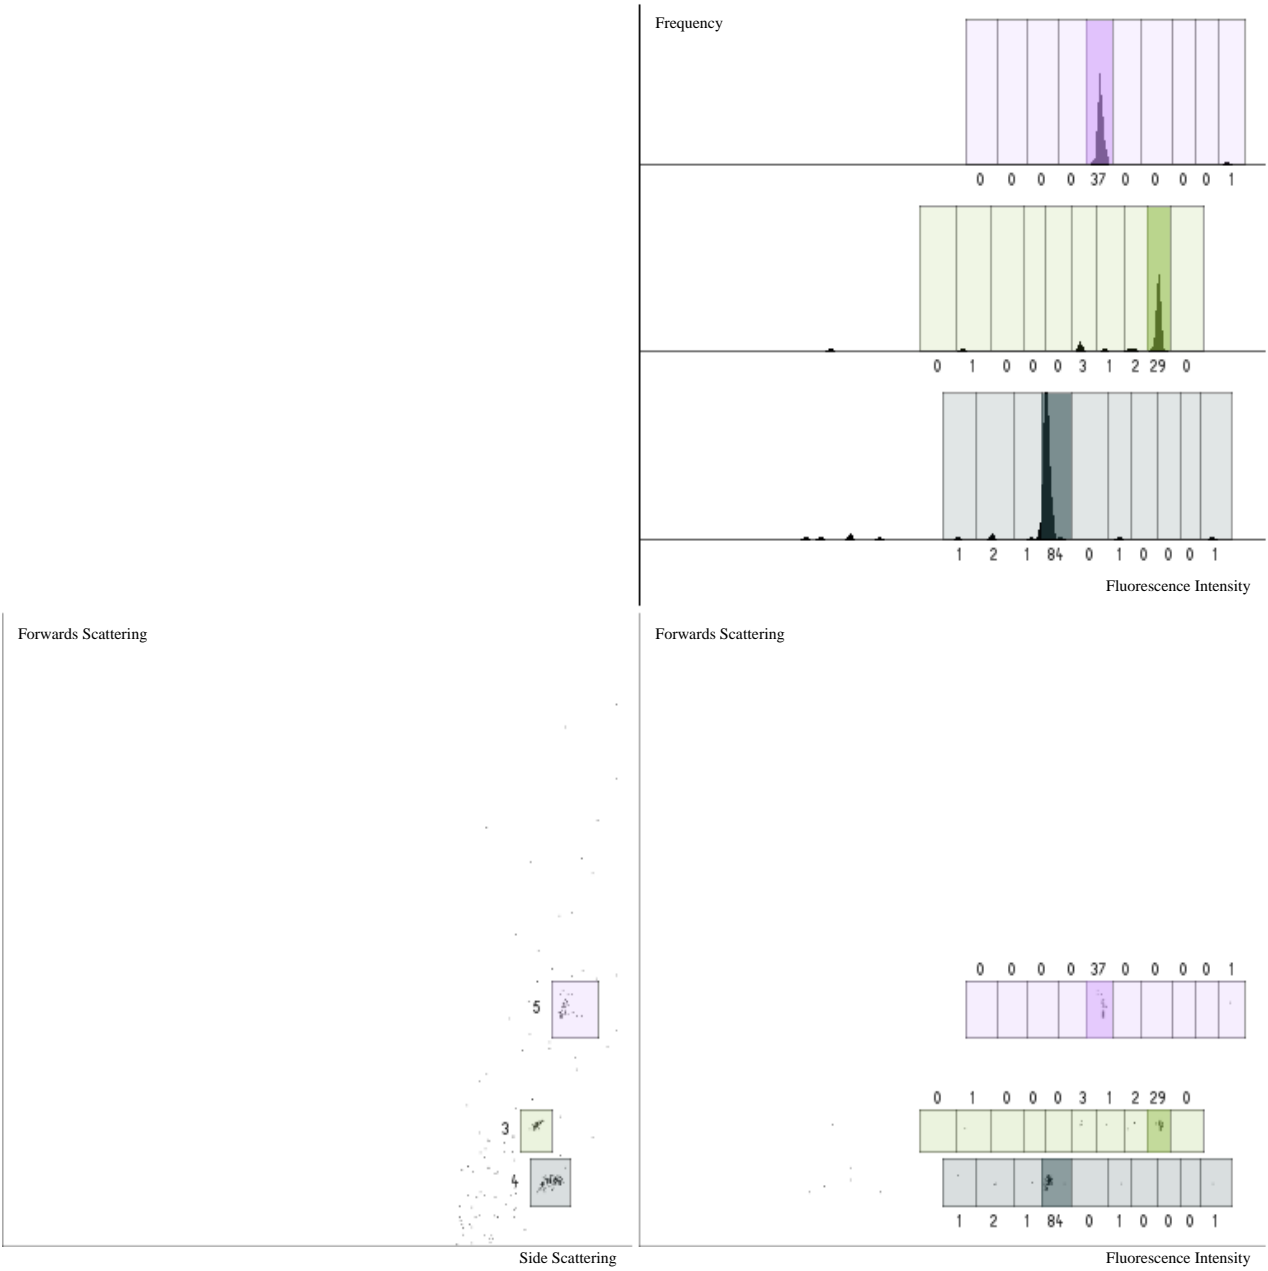

ANNEX 3: TAG DECONVOLUTION - BEAD 184

Passes flow sorting criteria: Yes  
Passes tag deconvolution criteria: Yes  
Included in protocol analysis: Yes  
Protocol: 2, 9, 6, 1  
Filename: Bin1\_plateC2\_C5.fcs  
Split 1: Petrol shading  
Split 2: Green shading  
Split 3: Violet shading

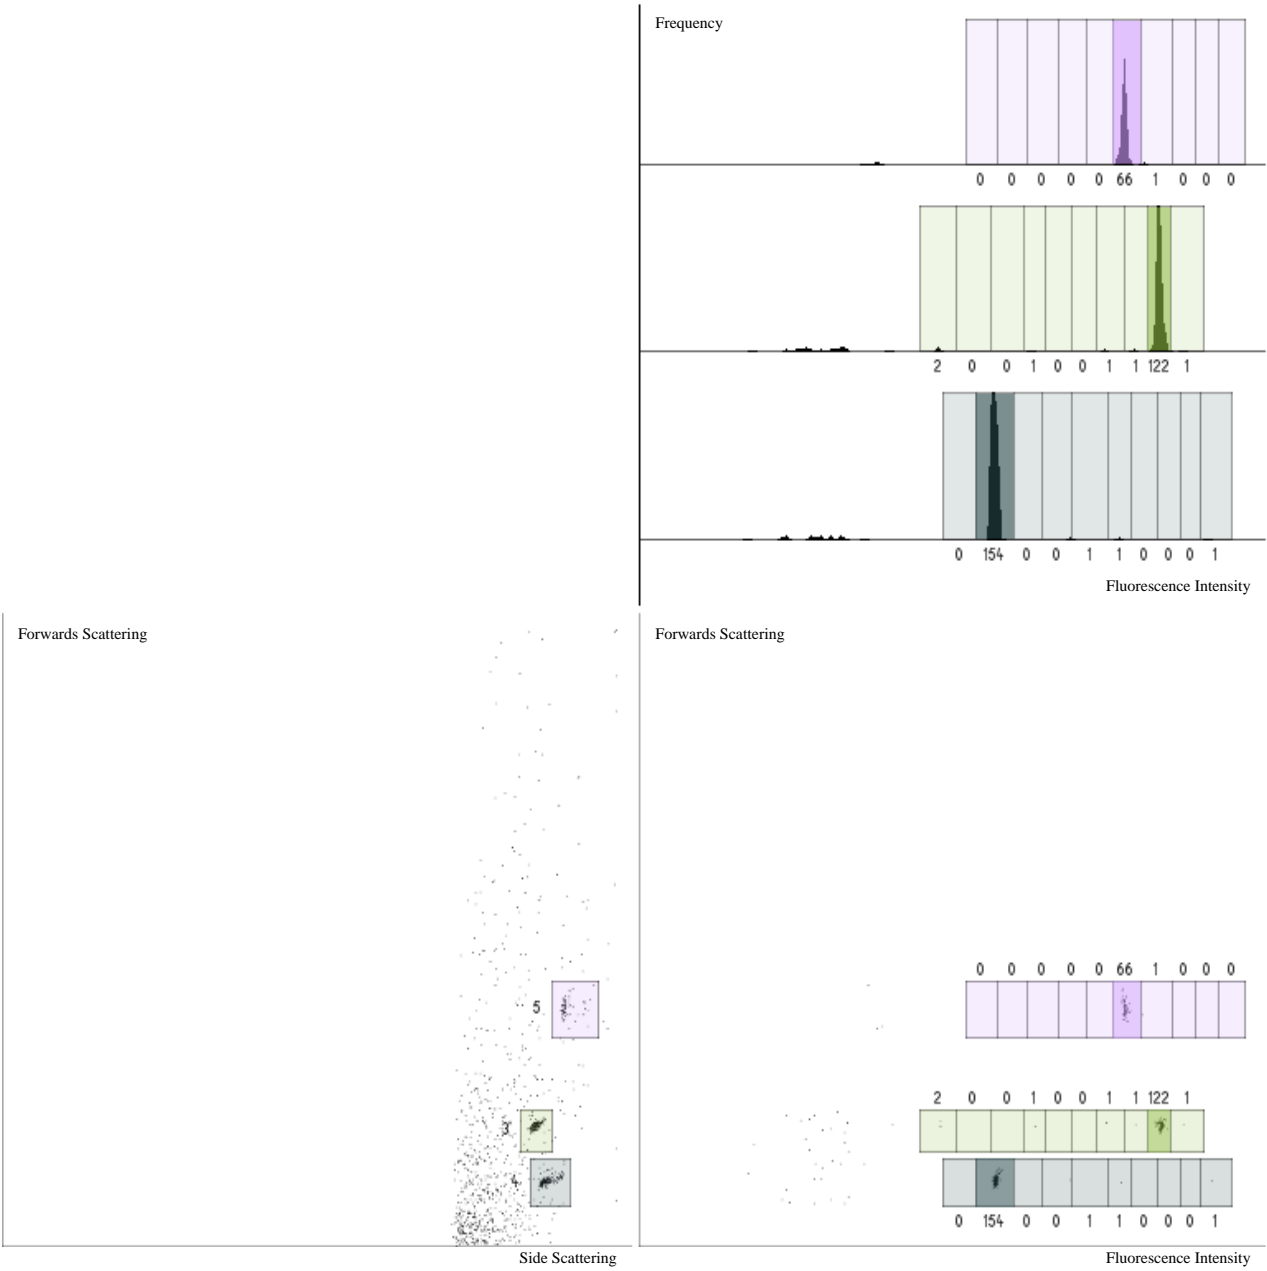

ANNEX 3: TAG DECONVOLUTION - BEAD 185

Passes flow sorting criteria: Yes  
Passes tag deconvolution criteria: Yes  
Included in protocol analysis: Yes  
Protocol: 3, 4, 1, 2  
Filename: Bin2\_plateA2\_E8.fcs  
Split 1: Petrol shading  
Split 2: Green shading  
Split 3: Violet shading

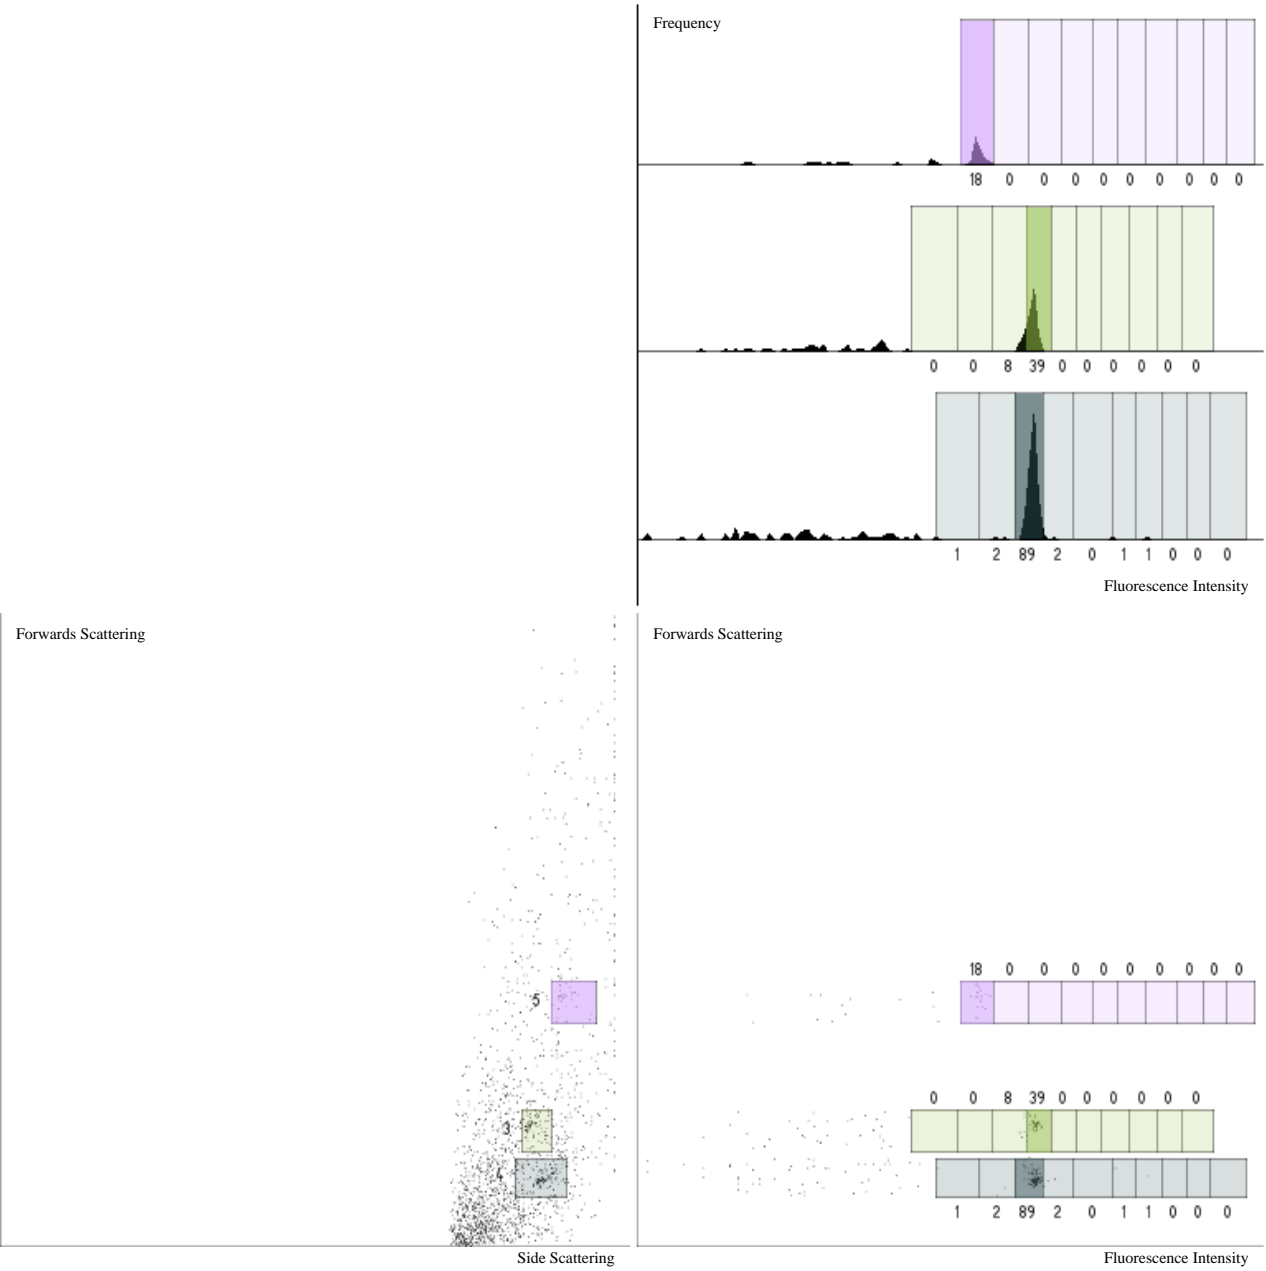

ANNEX 3: TAG DECONVOLUTION - BEAD 186

Passes flow sorting criteria: Yes  
Passes tag deconvolution criteria: Yes  
Included in protocol analysis: Yes  
Protocol: 5, 10, 2, 2  
Filename: Bin2\_plateA2\_A1.fcs  
Split 1: Petrol shading  
Split 2: Green shading  
Split 3: Violet shading

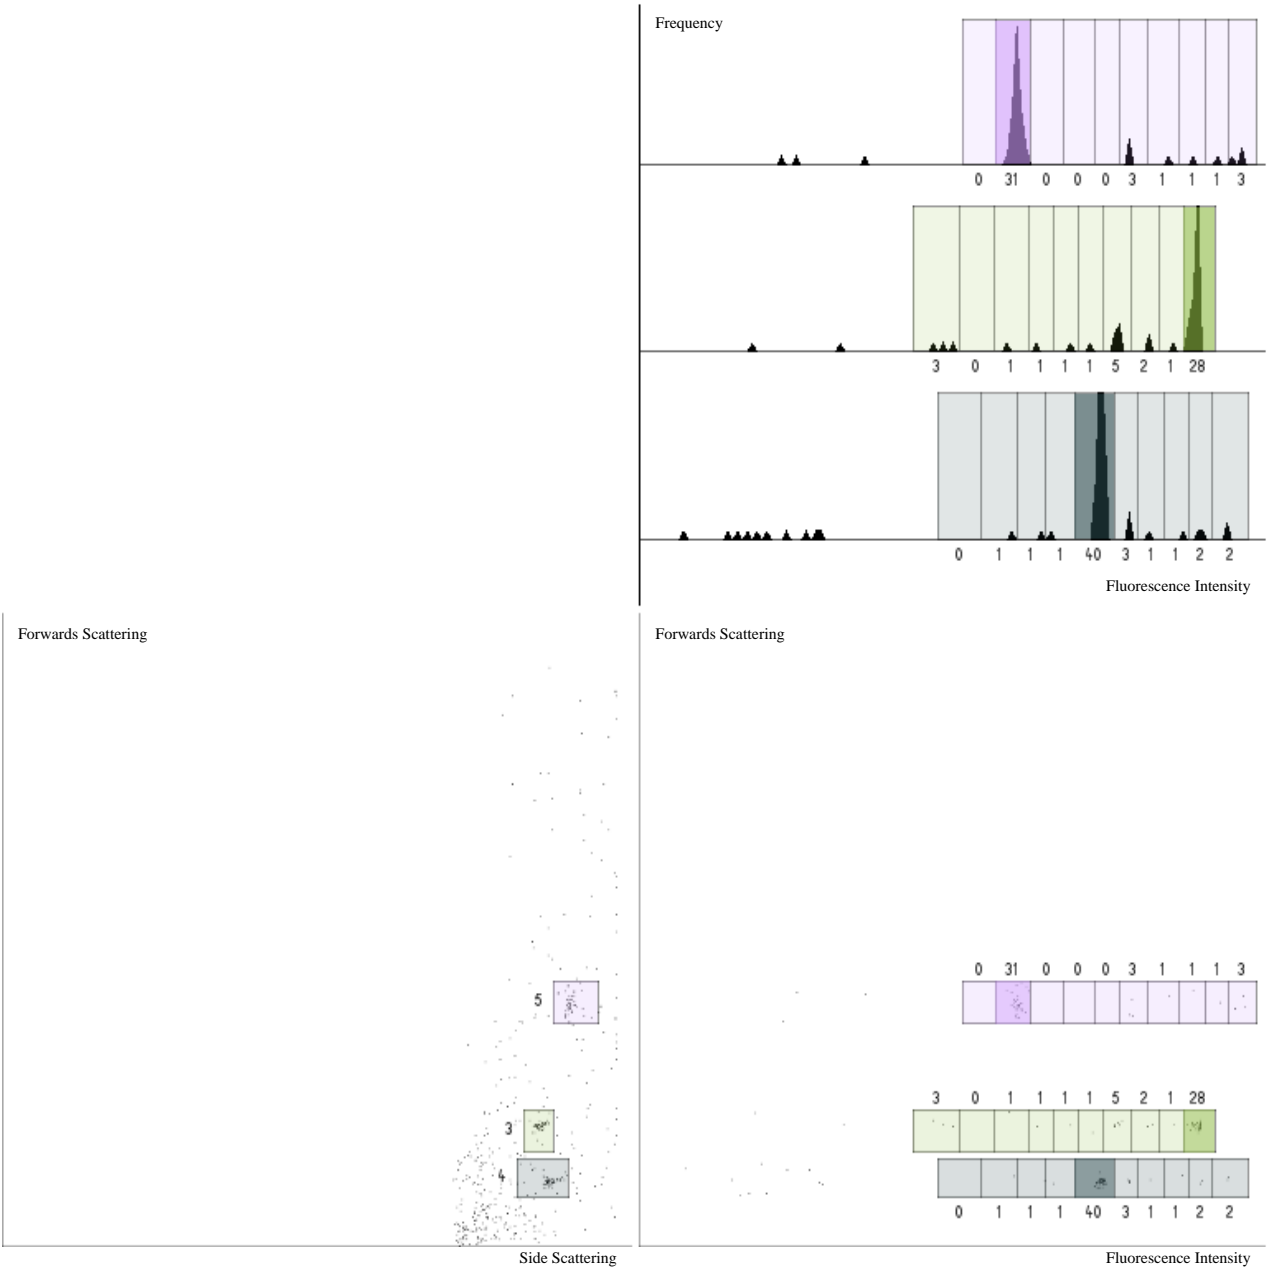

ANNEX 3: TAG DECONVOLUTION - BEAD 187

Passes flow sorting criteria: Yes  
Passes tag deconvolution criteria: Yes  
Included in protocol analysis: Yes  
Protocol: 8, 6, 5, 2  
Filename: Bin2\_plateA2\_A3.fcs  
Split 1: Petrol shading  
Split 2: Green shading  
Split 3: Violet shading

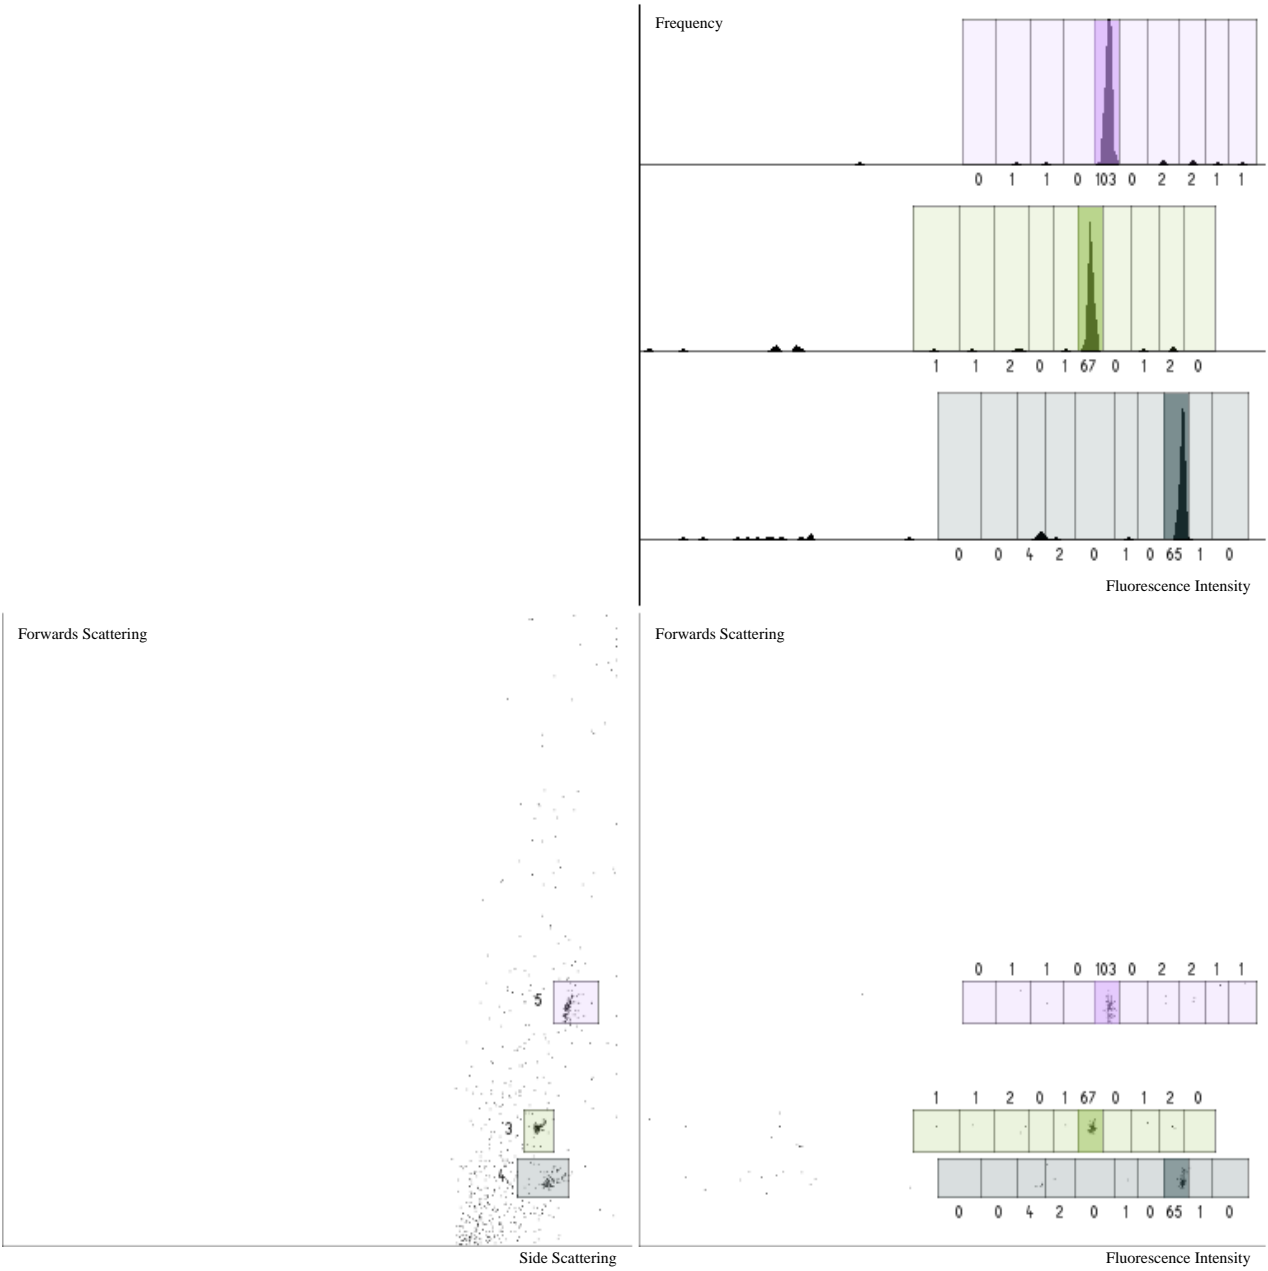

ANNEX 3: TAG DECONVOLUTION - BEAD 188

Passes flow sorting criteria: Yes  
Passes tag deconvolution criteria: Yes  
Included in protocol analysis: Yes  
Protocol: 9, 4, 9, 2  
Filename: Bin2\_plateA2\_A4.fcs  
Split 1: Petrol shading  
Split 2: Green shading  
Split 3: Violet shading

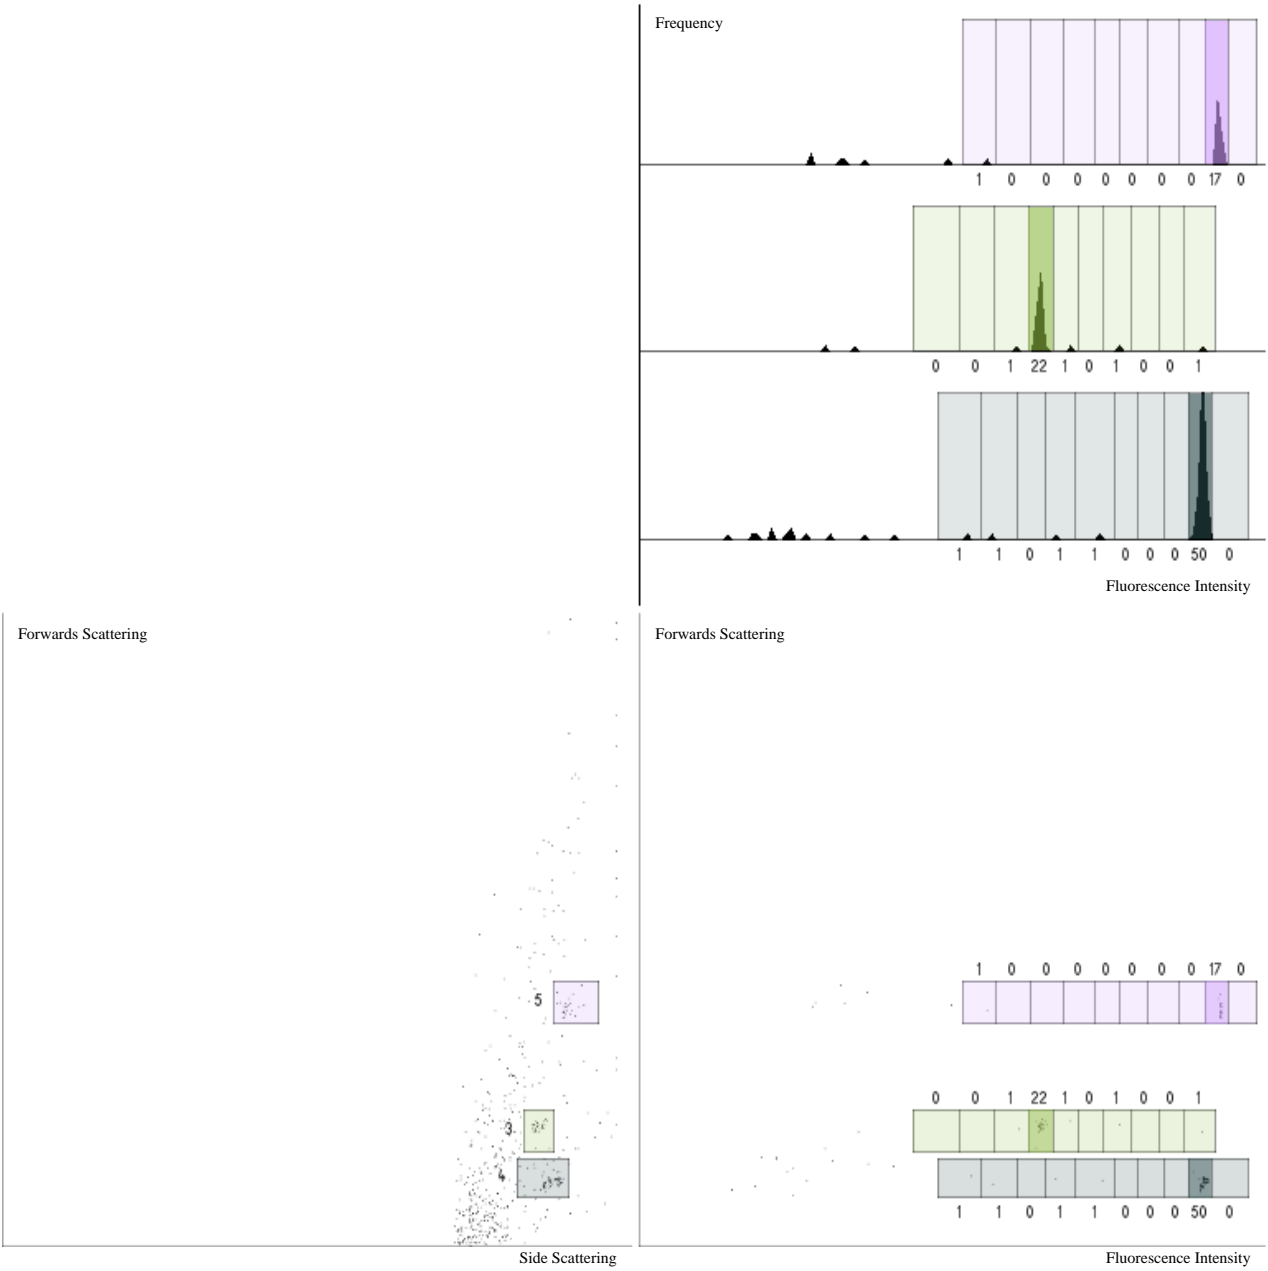

ANNEX 3: TAG DECONVOLUTION - BEAD 189

Passes flow sorting criteria: Yes  
Passes tag deconvolution criteria: Yes  
Included in protocol analysis: Yes  
Protocol: 4, 9, 3, 2  
Filename: Bin2\_plateA2\_A5.fcs  
Split 1: Petrol shading  
Split 2: Green shading  
Split 3: Violet shading

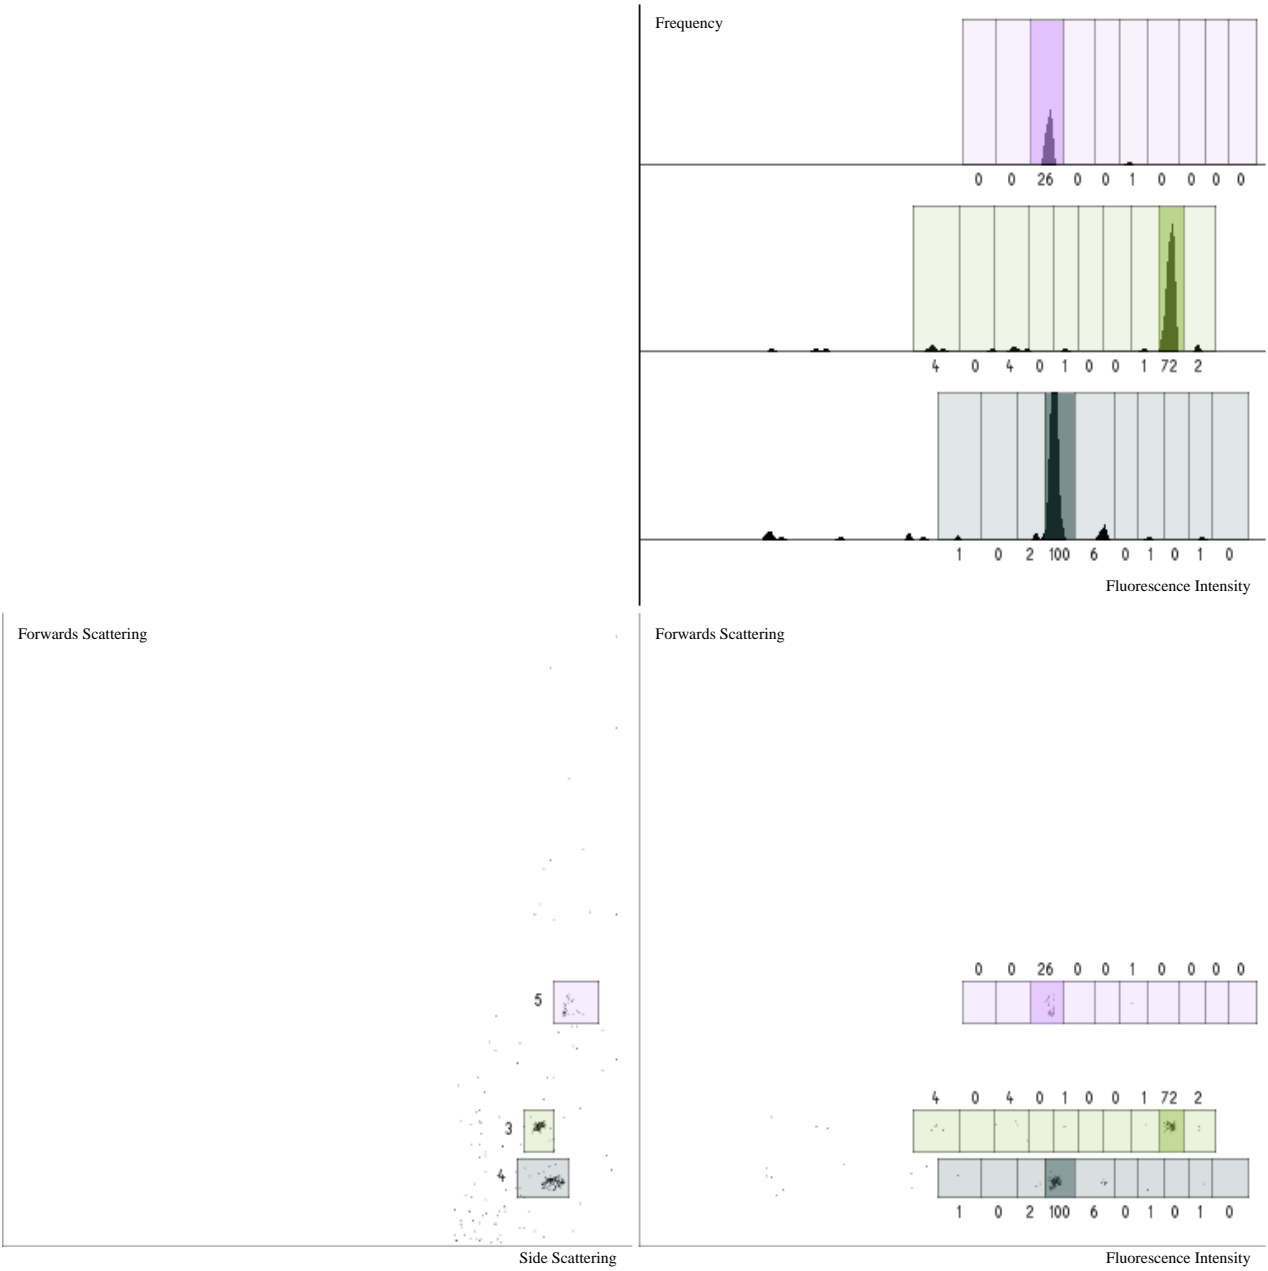

ANNEX 3: TAG DECONVOLUTION - BEAD 190

Passes flow sorting criteria: Yes  
Passes tag deconvolution criteria: Yes  
Included in protocol analysis: Yes  
Protocol: 3, 6, 10, 2  
Filename: Bin2\_plateA2\_A6.fcs  
Split 1: Petrol shading  
Split 2: Green shading  
Split 3: Violet shading

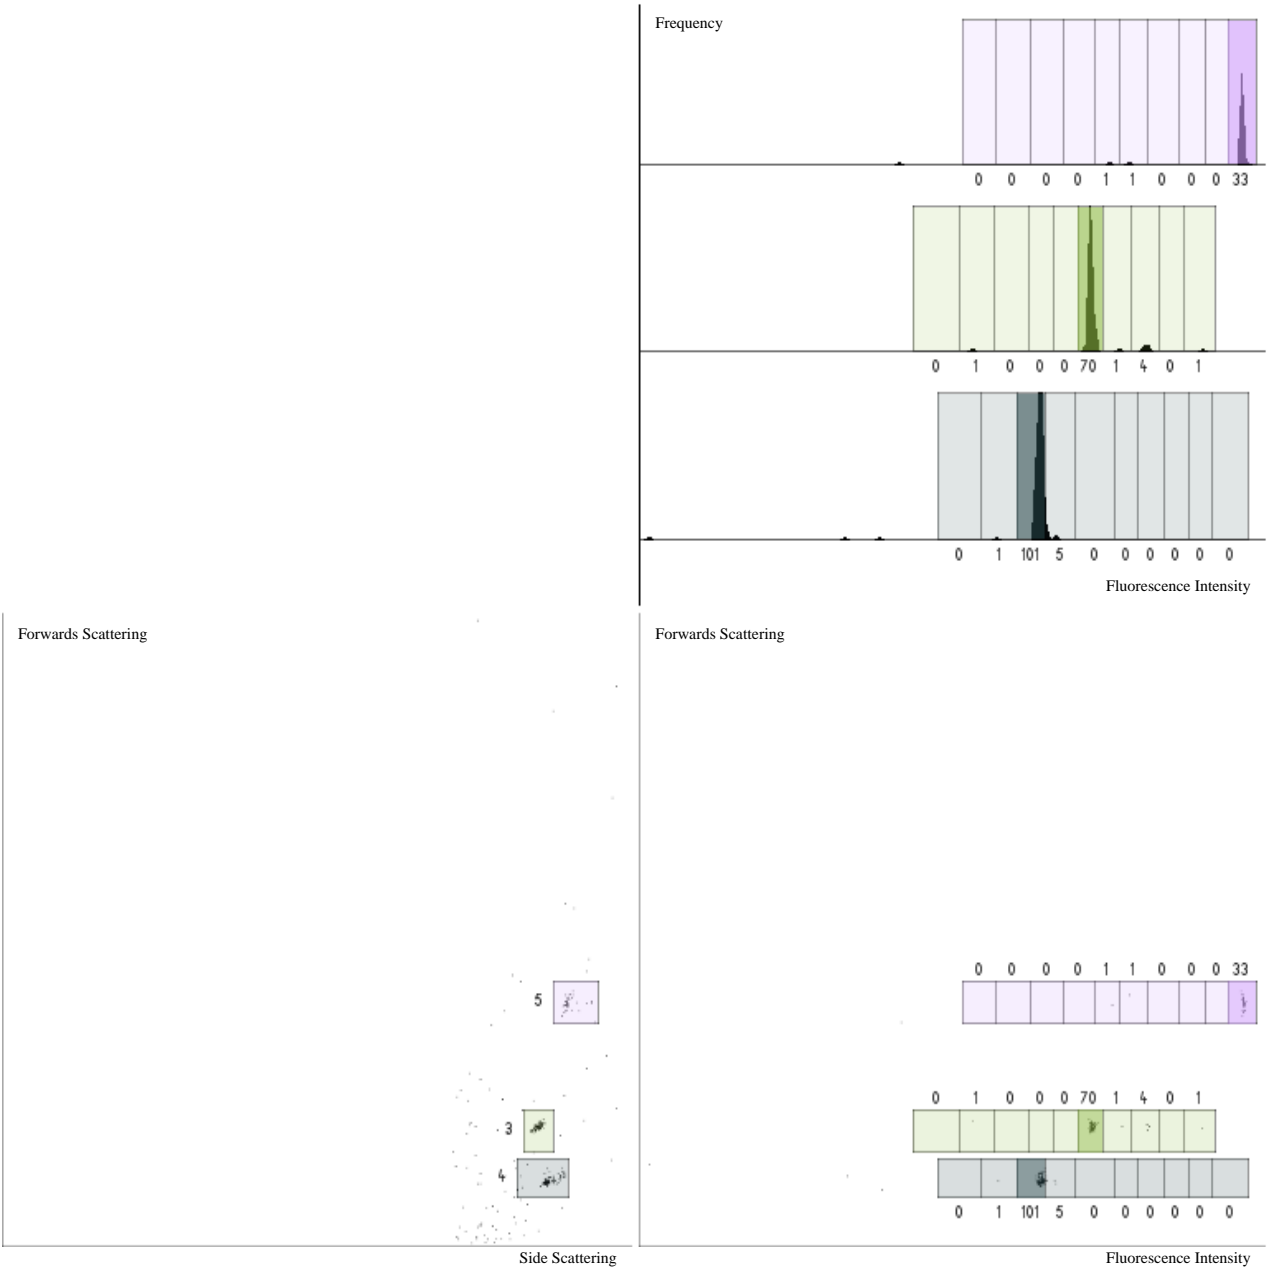



ANNEX 3: TAG DECONVOLUTION - BEAD 191

Passes flow sorting criteria: Yes  
Passes tag deconvolution criteria: No  
Included in protocol analysis: No  
Protocol: N/A  
Filename: Bin2\_plateA2\_A7.fcs  
Split 1: Petrol shading  
Split 2: Green shading  
Split 3: Violet shading

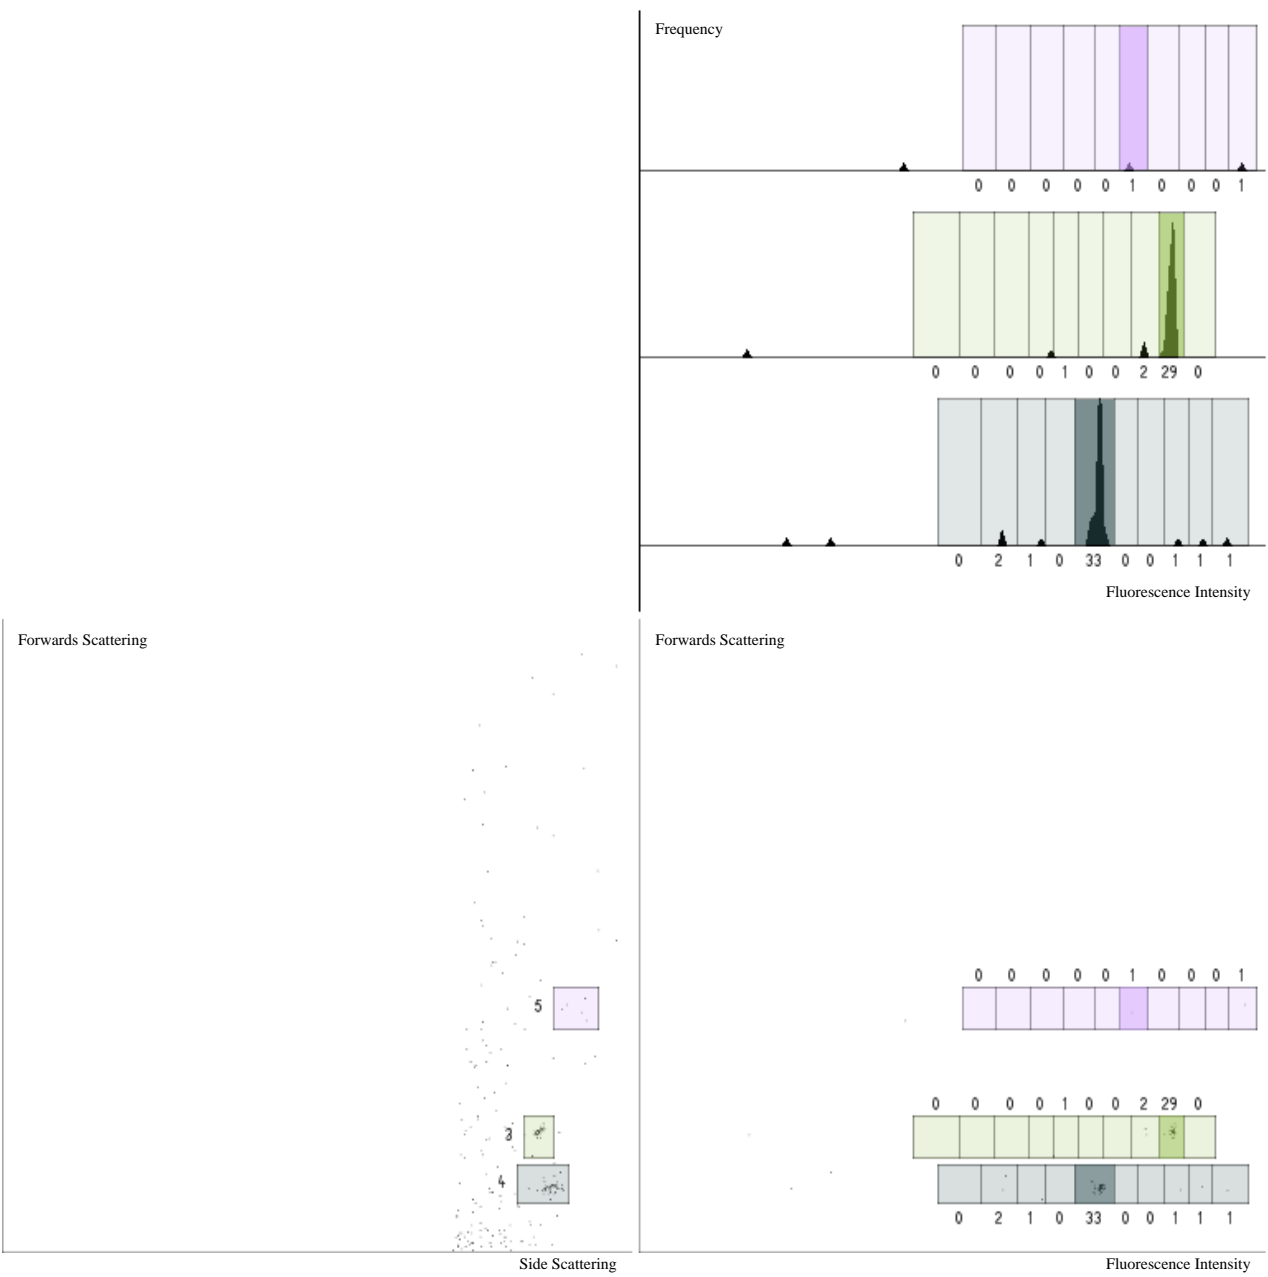

ANNEX 3: TAG DECONVOLUTION - BEAD 192

Passes flow sorting criteria: Yes  
Passes tag deconvolution criteria: No  
Included in protocol analysis: No  
Protocol: N/A  
Filename: Bin2\_plateA2\_A8.fcs  
Split 1: Petrol shading  
Split 2: Green shading  
Split 3: Violet shading

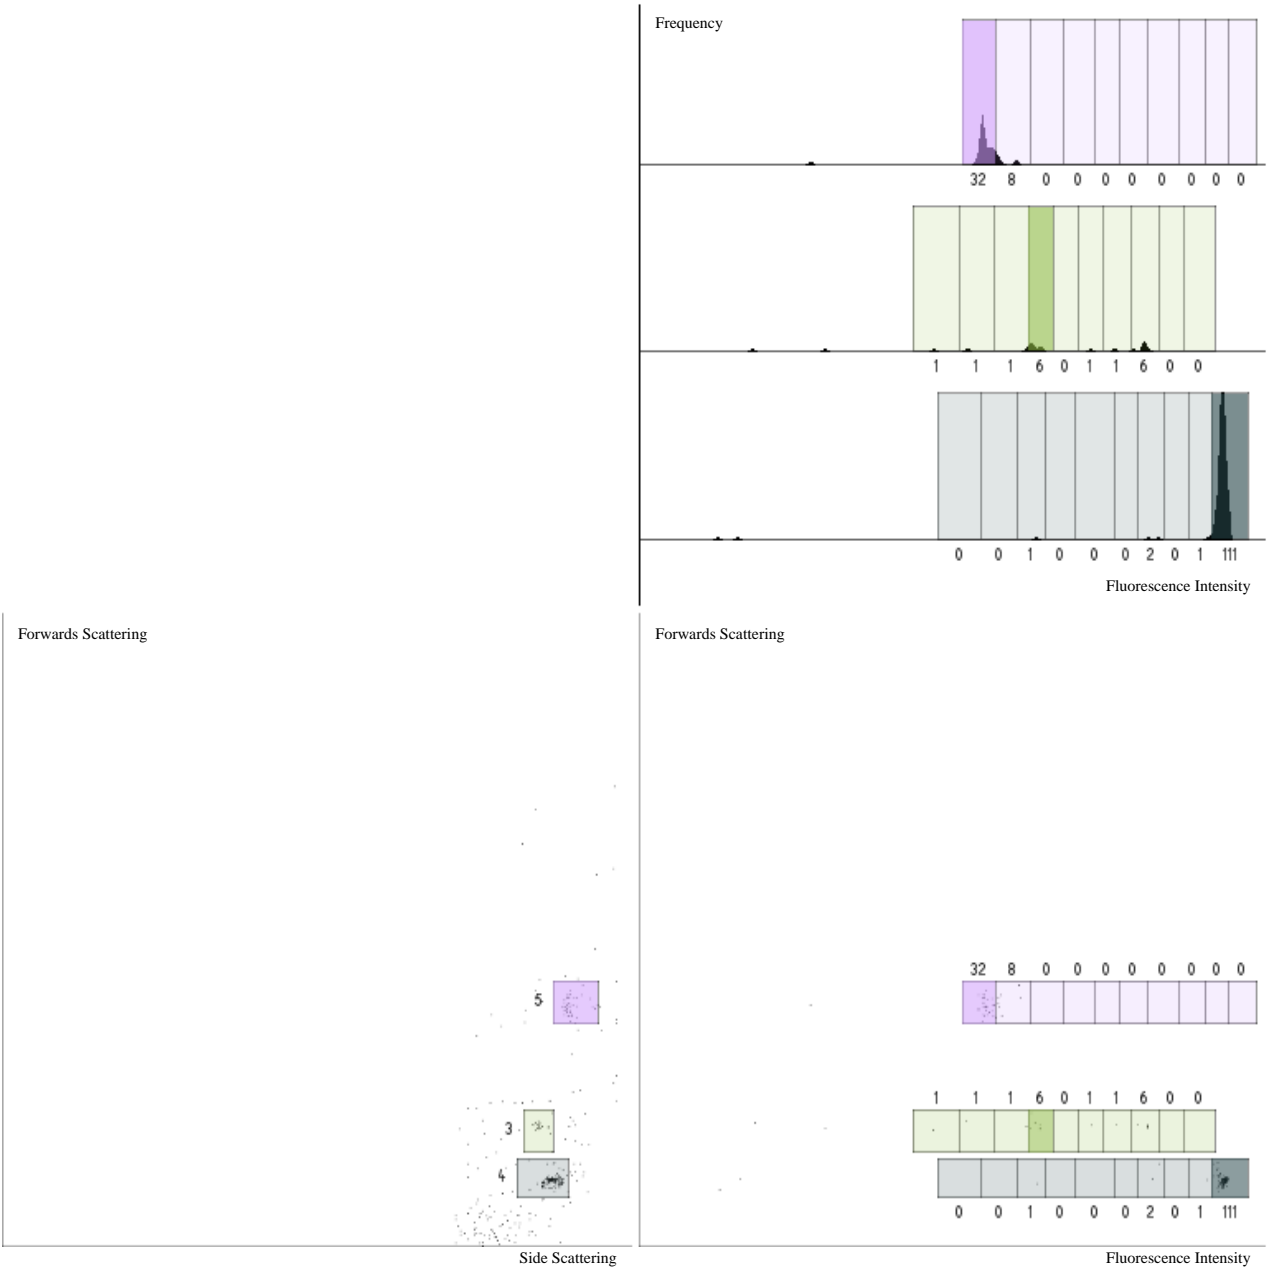

ANNEX 3: TAG DECONVOLUTION - BEAD 193

Passes flow sorting criteria: Yes  
Passes tag deconvolution criteria: Yes  
Included in protocol analysis: Yes  
Protocol: 10, 4, 4, 2  
Filename: Bin2\_plateA2\_A9.fcs  
Split 1: Petrol shading  
Split 2: Green shading  
Split 3: Violet shading

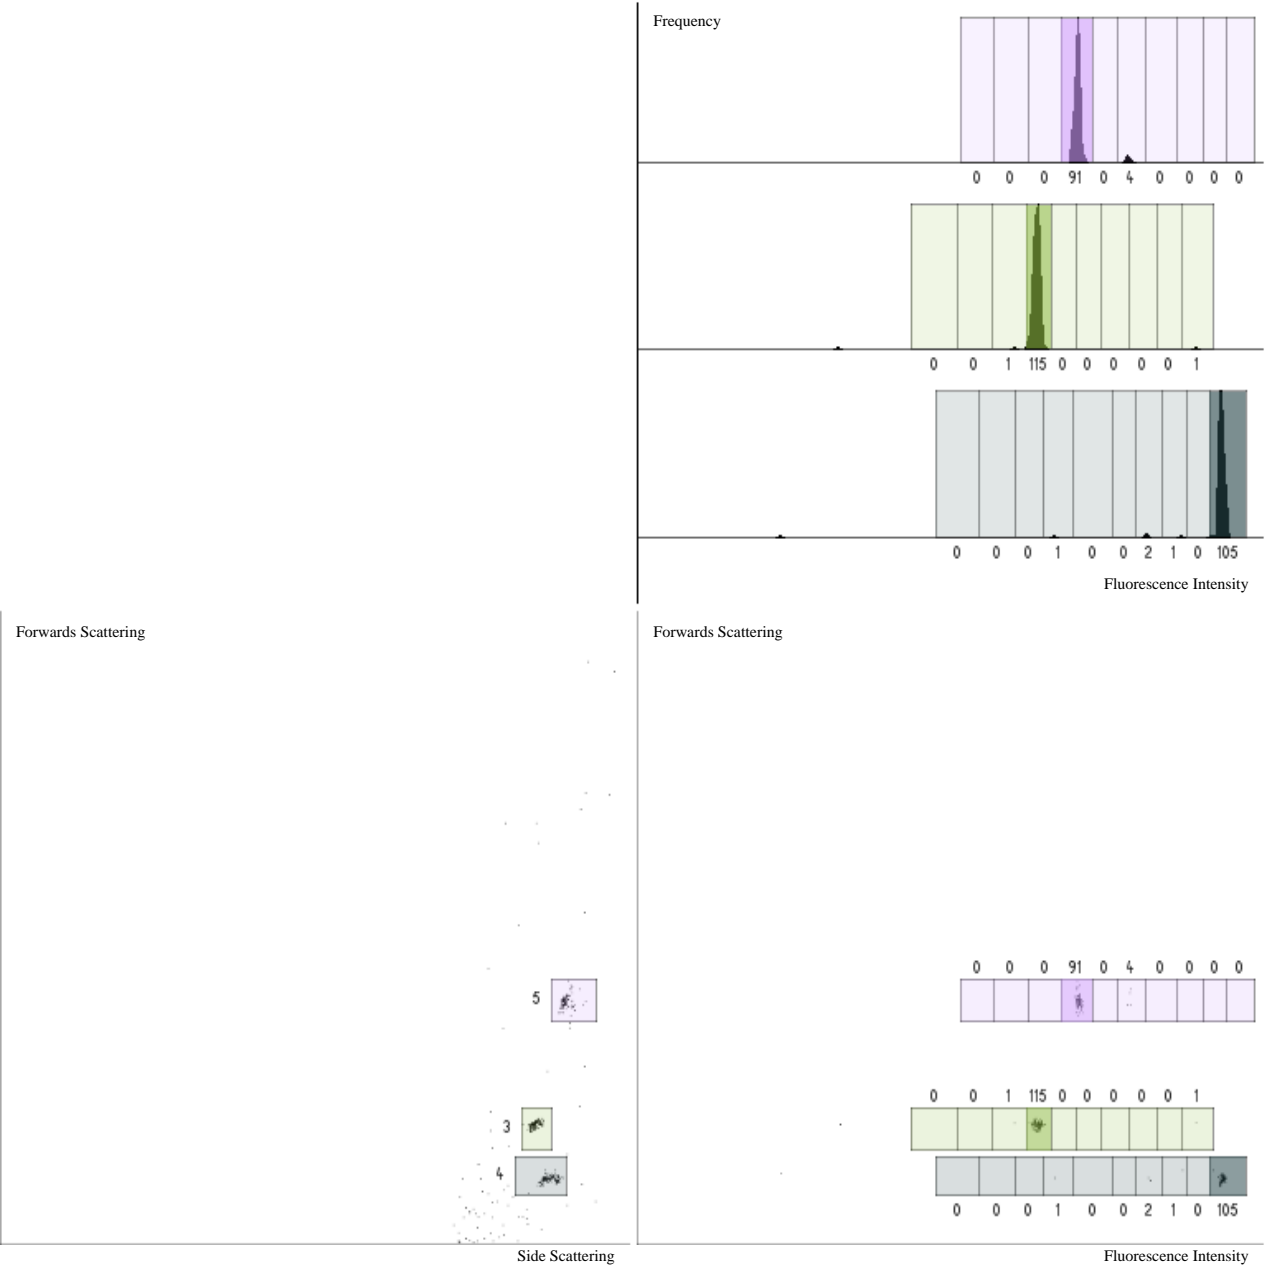

ANNEX 3: TAG DECONVOLUTION - BEAD 194

Passes flow sorting criteria: Yes  
Passes tag deconvolution criteria: Yes  
Included in protocol analysis: Yes  
Protocol: 10, 6, 9, 2  
Filename: Bin2\_plateA2\_A10.fcs  
Split 1: Petrol shading  
Split 2: Green shading  
Split 3: Violet shading

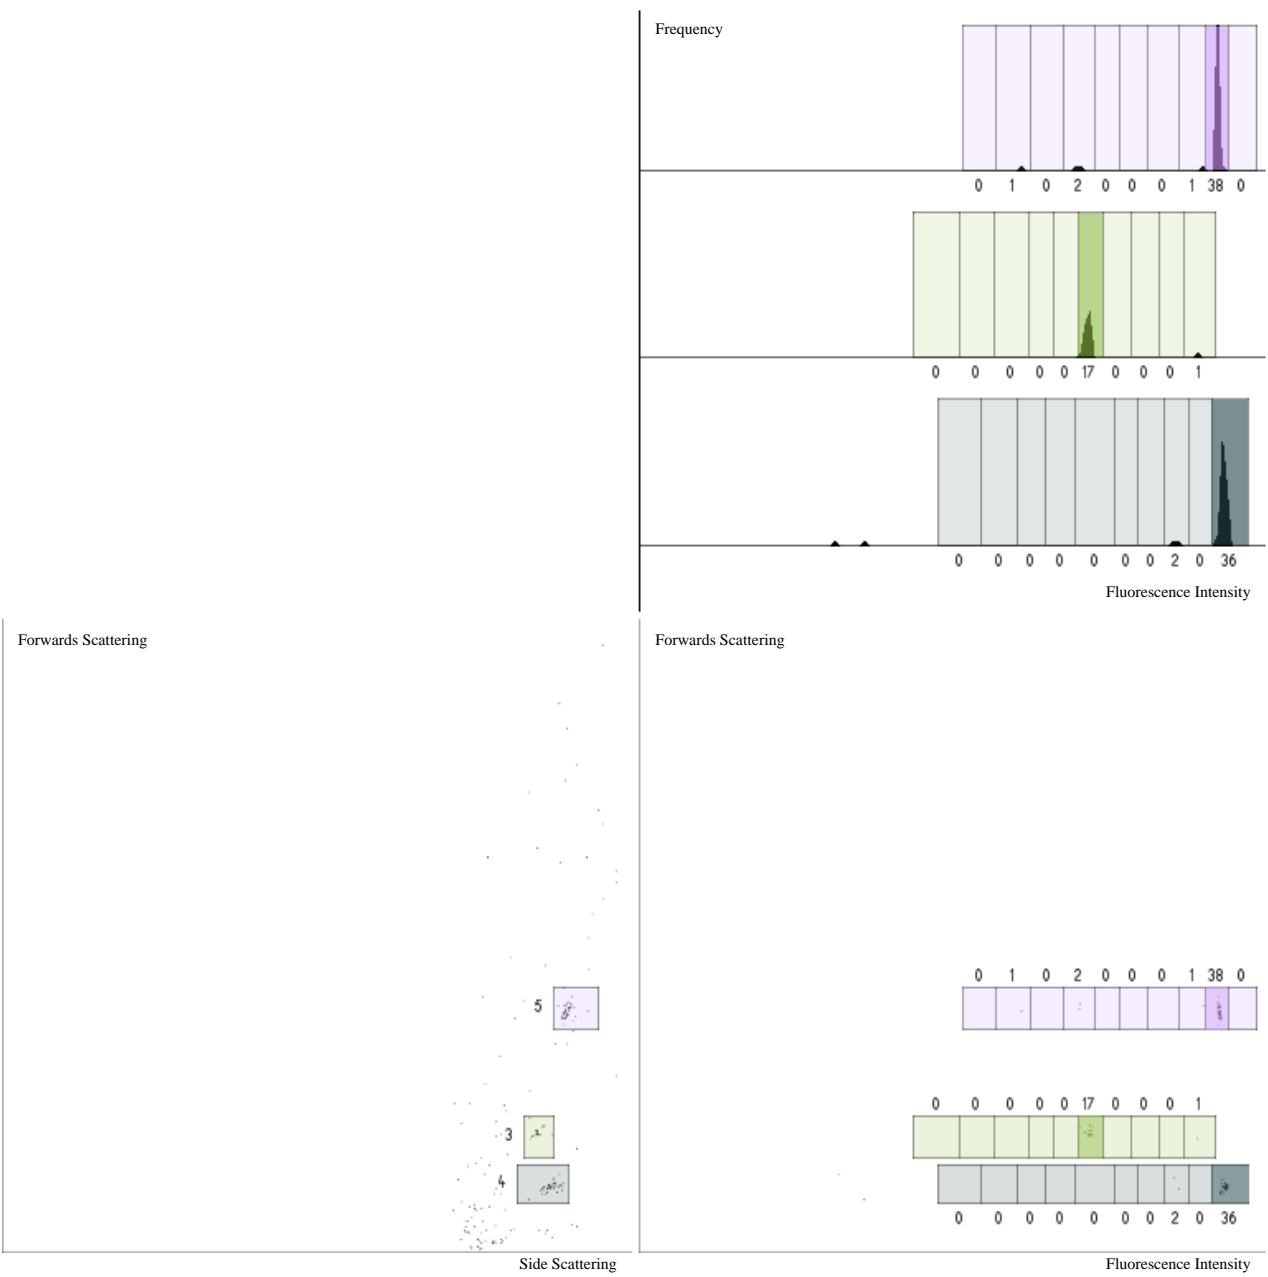

ANNEX 3: TAG DECONVOLUTION - BEAD 195

Passes flow sorting criteria: Yes  
Passes tag deconvolution criteria: Yes  
Included in protocol analysis: Yes  
Protocol: 5, 8, 9, 2  
Filename: Bin2\_plateA2\_A11.fcs  
Split 1: Petrol shading  
Split 2: Green shading  
Split 3: Violet shading

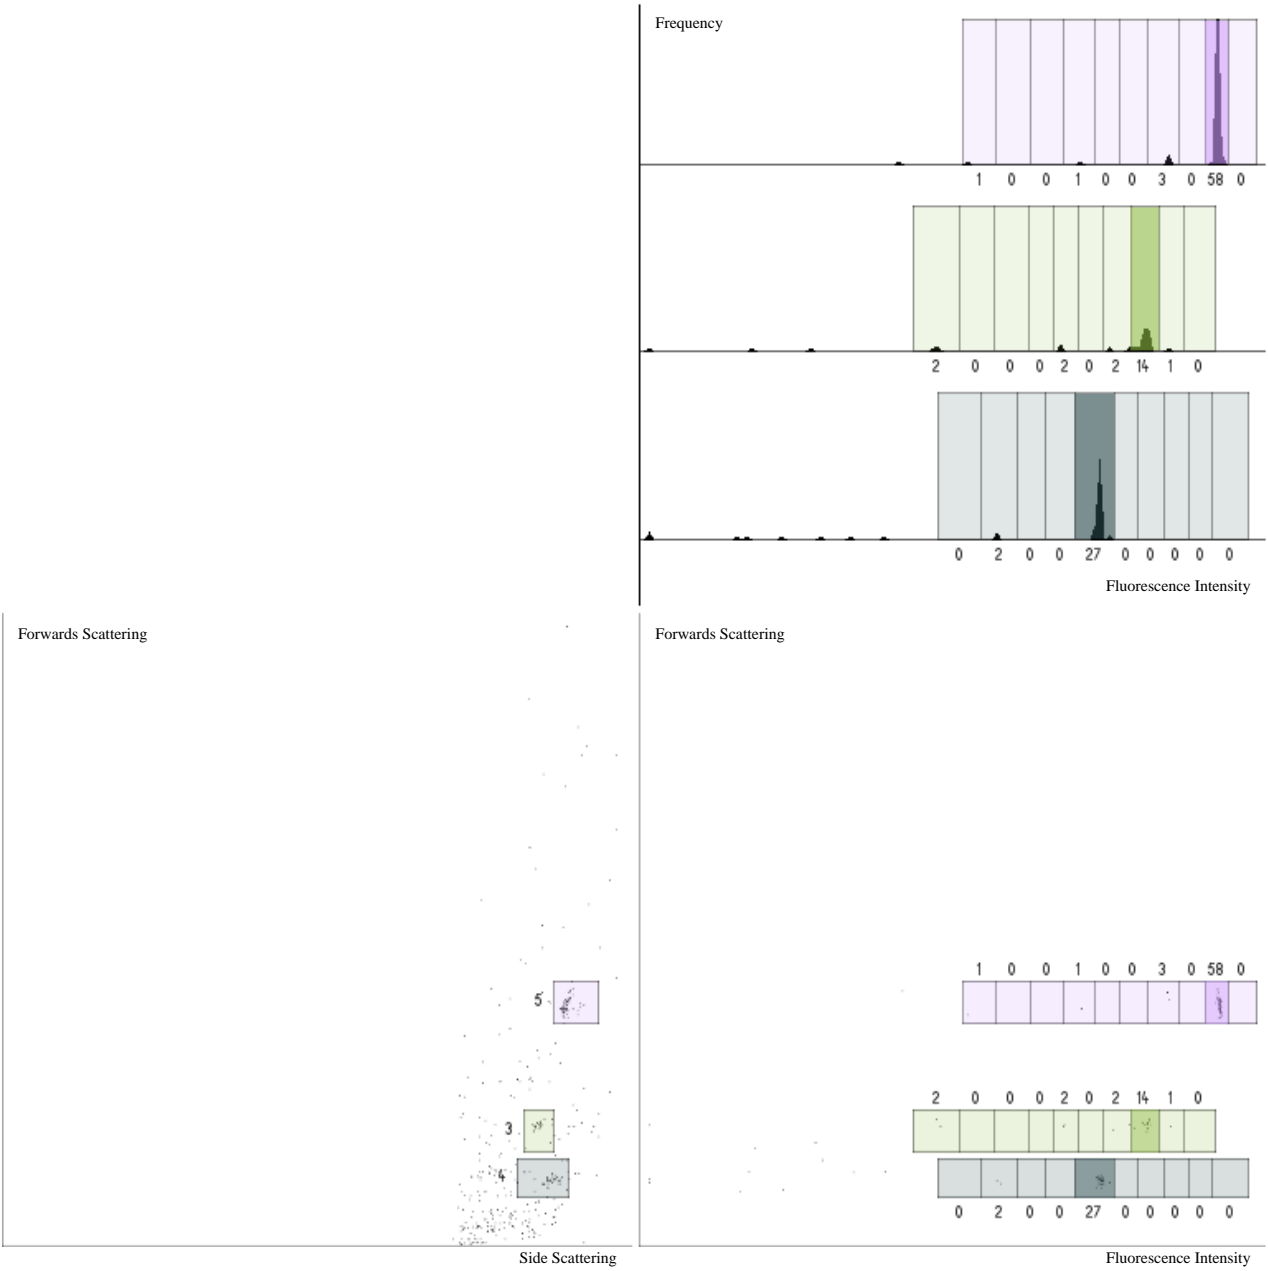

ANNEX 3: TAG DECONVOLUTION - BEAD 196

Passes flow sorting criteria: Yes  
Passes tag deconvolution criteria: Yes  
Included in protocol analysis: Yes  
Protocol: 4, 1, 2, 2  
Filename: Bin2\_plateA2\_A12.fcs  
Split 1: Petrol shading  
Split 2: Green shading  
Split 3: Violet shading

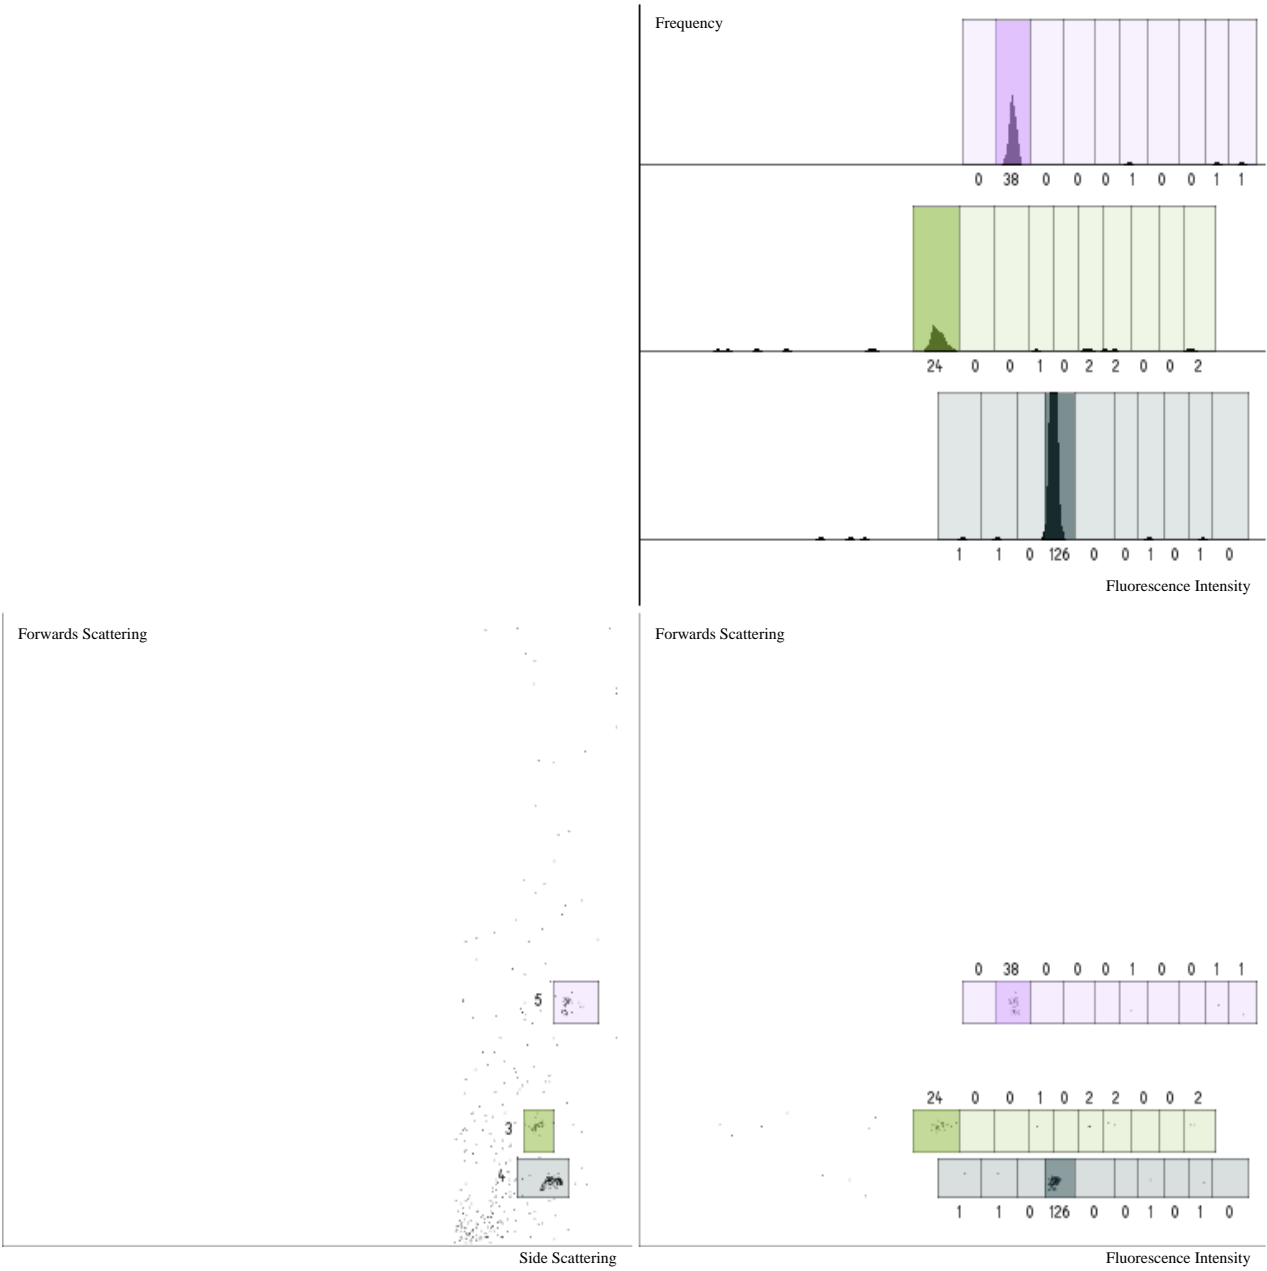

ANNEX 3: TAG DECONVOLUTION - BEAD 197

Passes flow sorting criteria: Yes  
Passes tag deconvolution criteria: Yes  
Included in protocol analysis: Yes  
Protocol: 2, 3, 10, 2  
Filename: Bin2\_plateA2\_B1.fcs  
Split 1: Petrol shading  
Split 2: Green shading  
Split 3: Violet shading

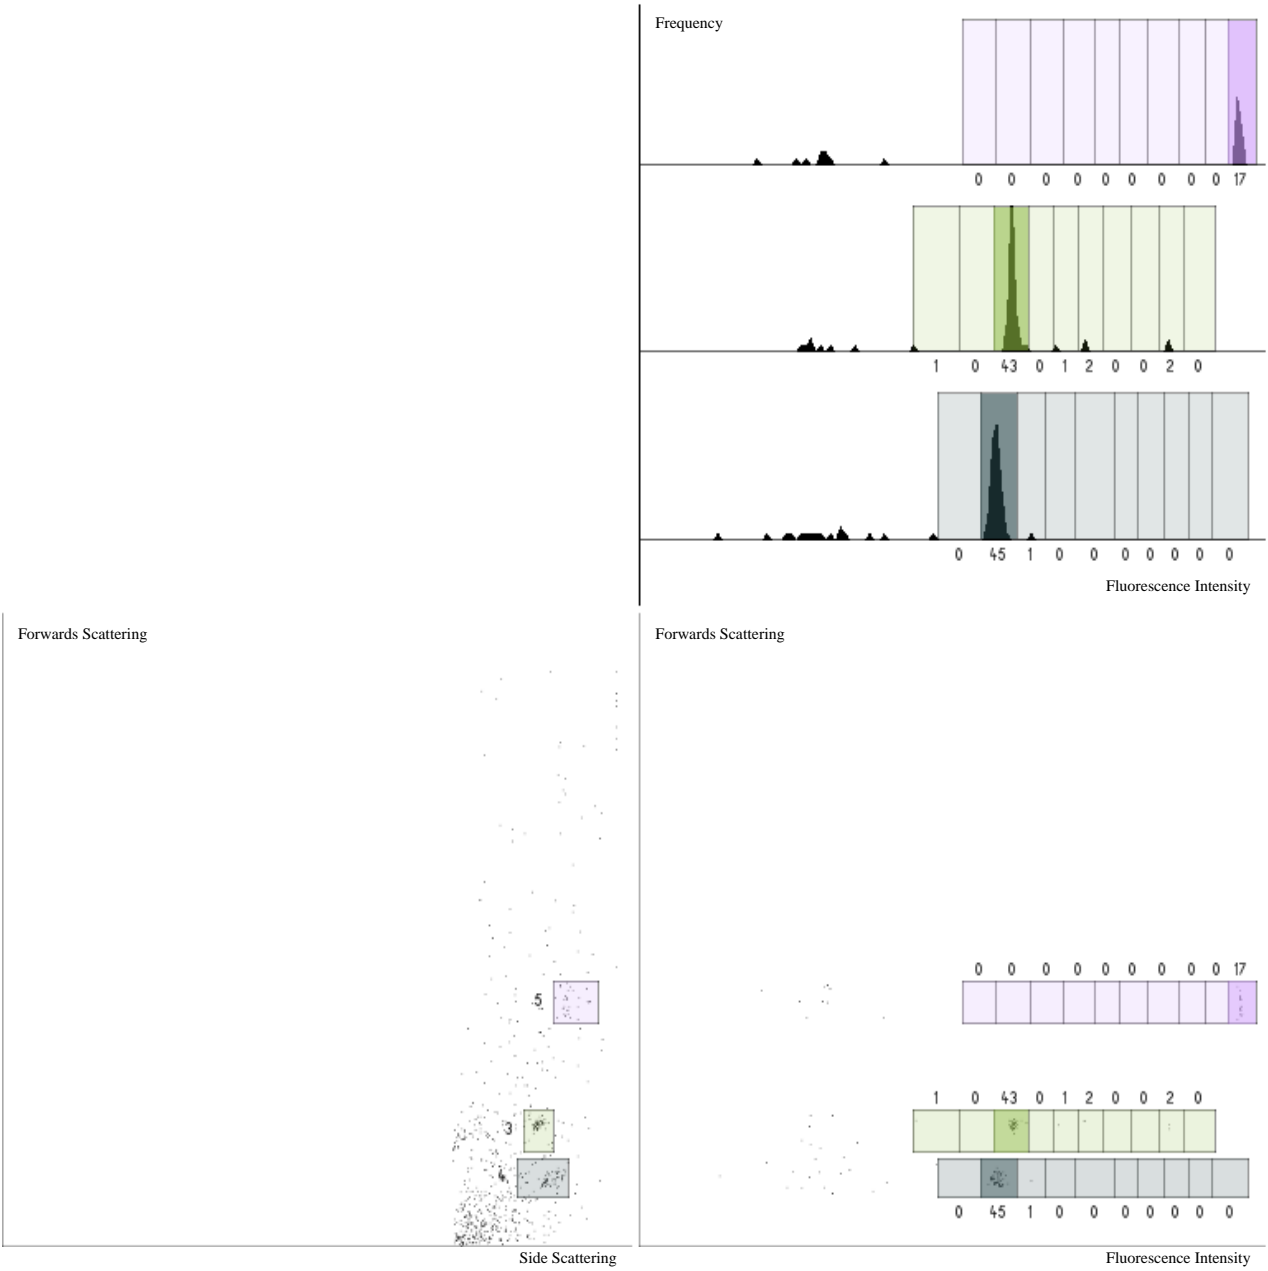

ANNEX 3: TAG DECONVOLUTION - BEAD 198

Passes flow sorting criteria: Yes  
Passes tag deconvolution criteria: Yes  
Included in protocol analysis: Yes  
Protocol: 5, 9, 2, 2  
Filename: Bin2\_plateA2\_B3.fcs  
Split 1: Petrol shading  
Split 2: Green shading  
Split 3: Violet shading

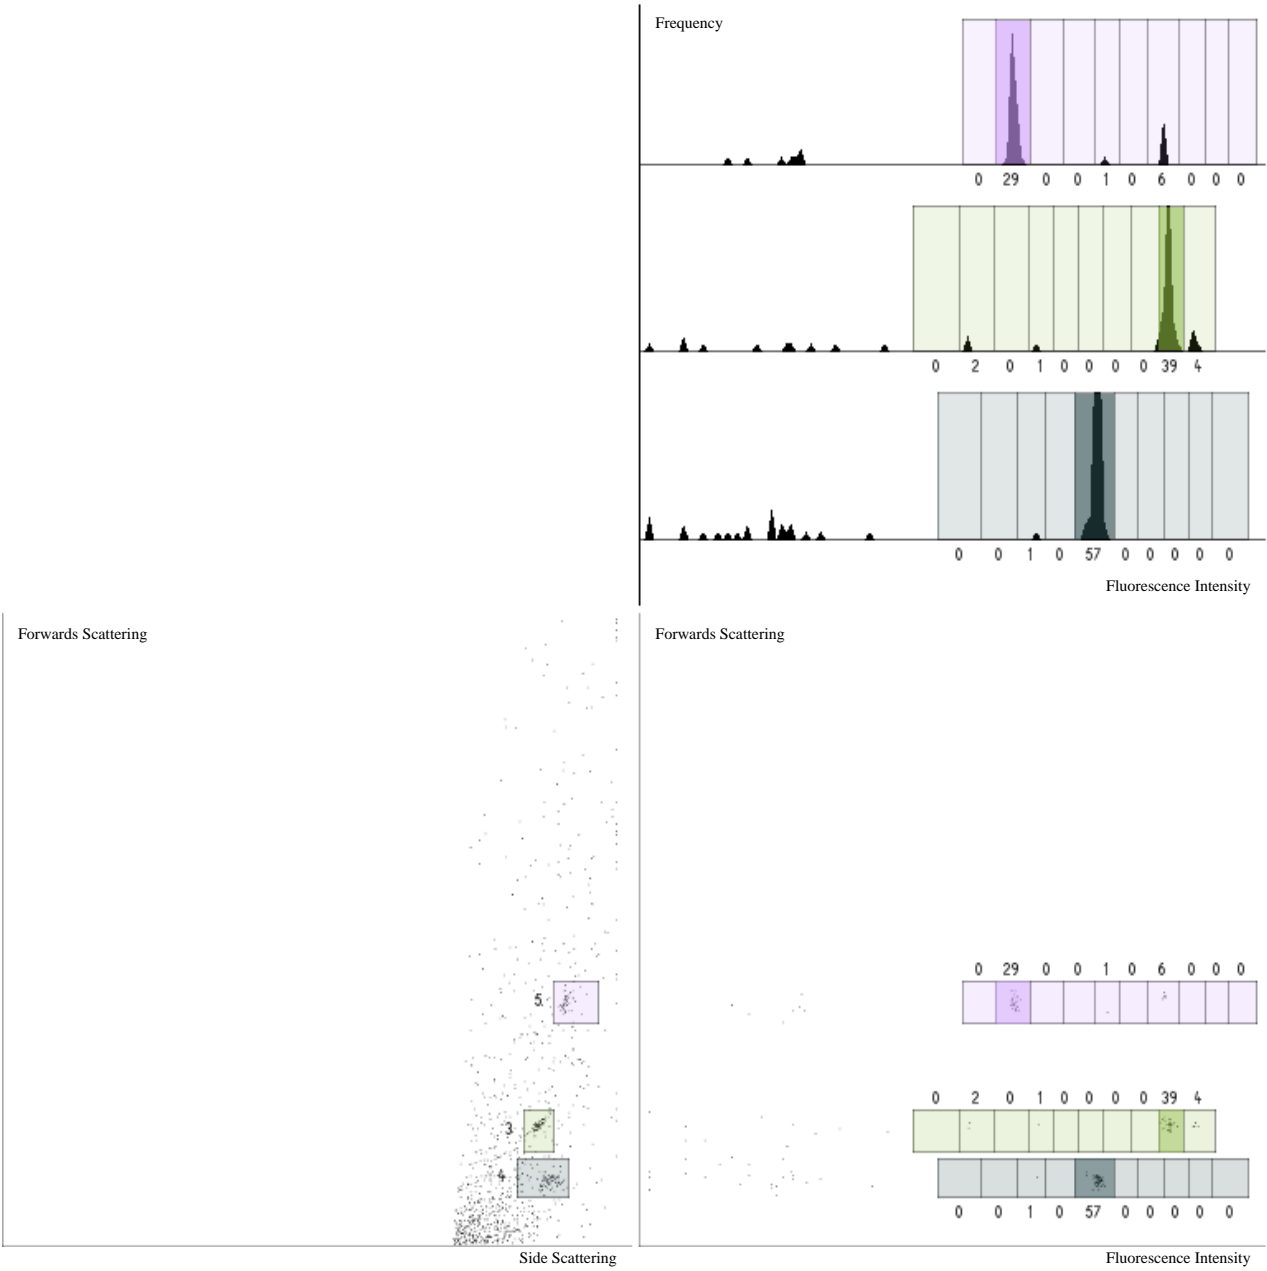



ANNEX 3: TAG DECONVOLUTION - BEAD 199

Passes flow sorting criteria: Yes  
Passes tag deconvolution criteria: Yes  
Included in protocol analysis: Yes  
Protocol: 3, 5, 9, 2  
Filename: Bin2\_plateA2\_B5.fcs  
Split 1: Petrol shading  
Split 2: Green shading  
Split 3: Violet shading

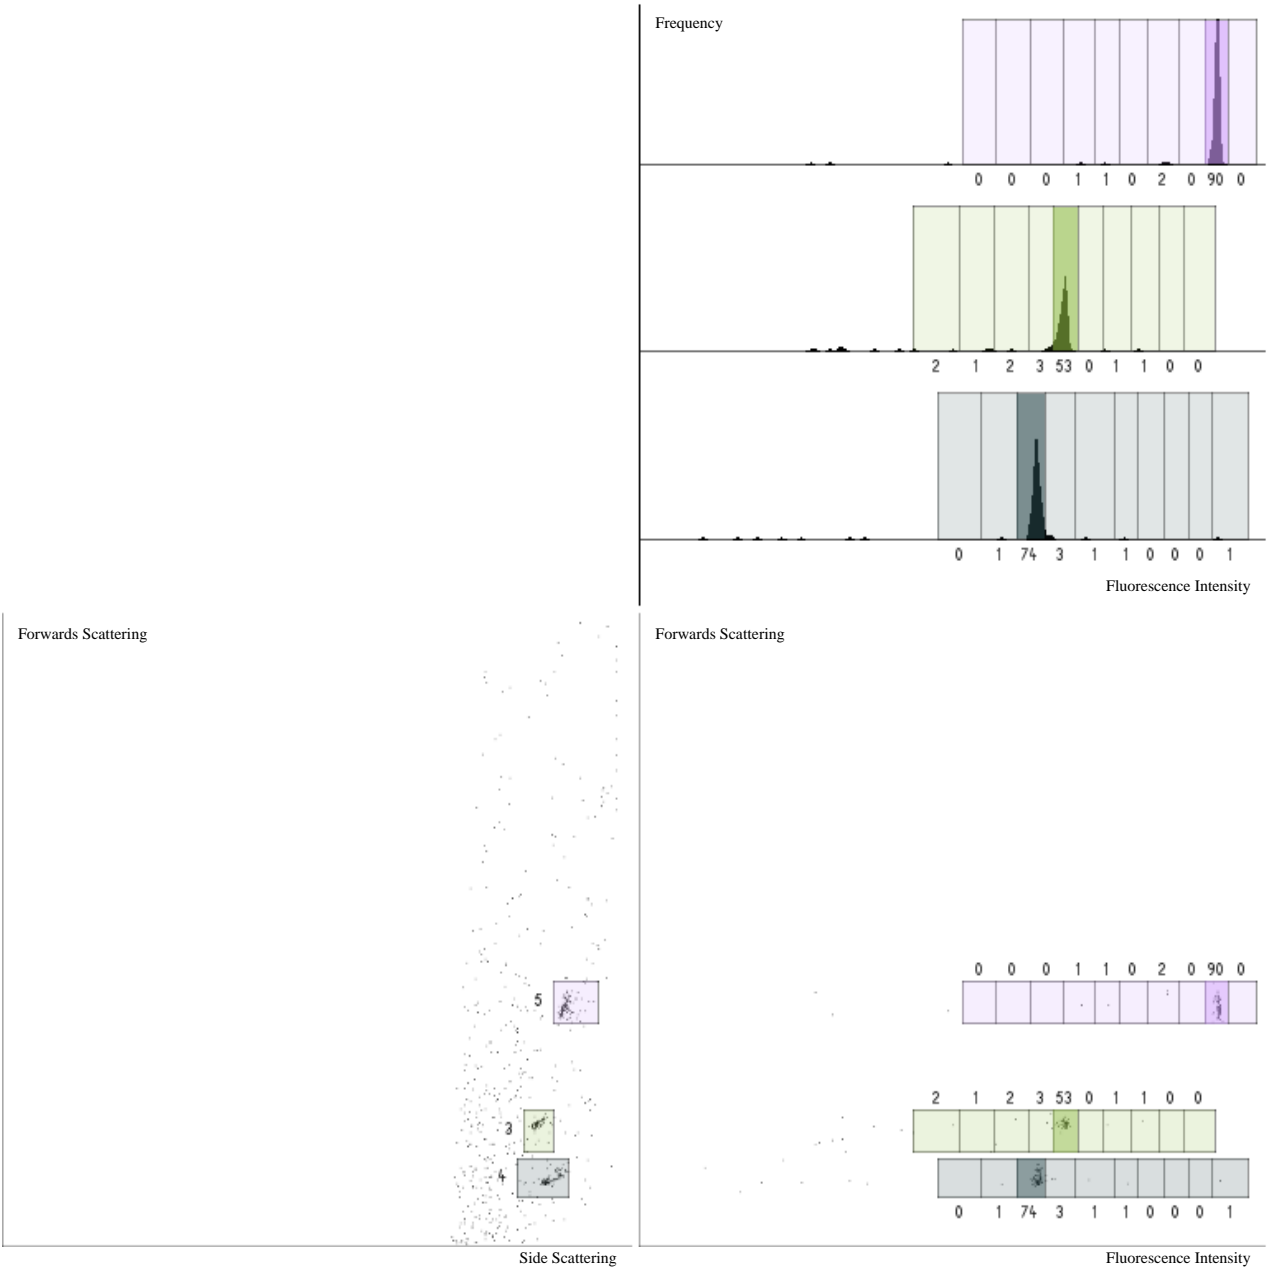

ANNEX 3: TAG DECONVOLUTION - BEAD 200

Passes flow sorting criteria: Yes  
Passes tag deconvolution criteria: Yes  
Included in protocol analysis: Yes  
Protocol: 2, 9, 3, 2  
Filename: Bin2\_plateA2\_B6.fcs  
Split 1: Petrol shading  
Split 2: Green shading  
Split 3: Violet shading

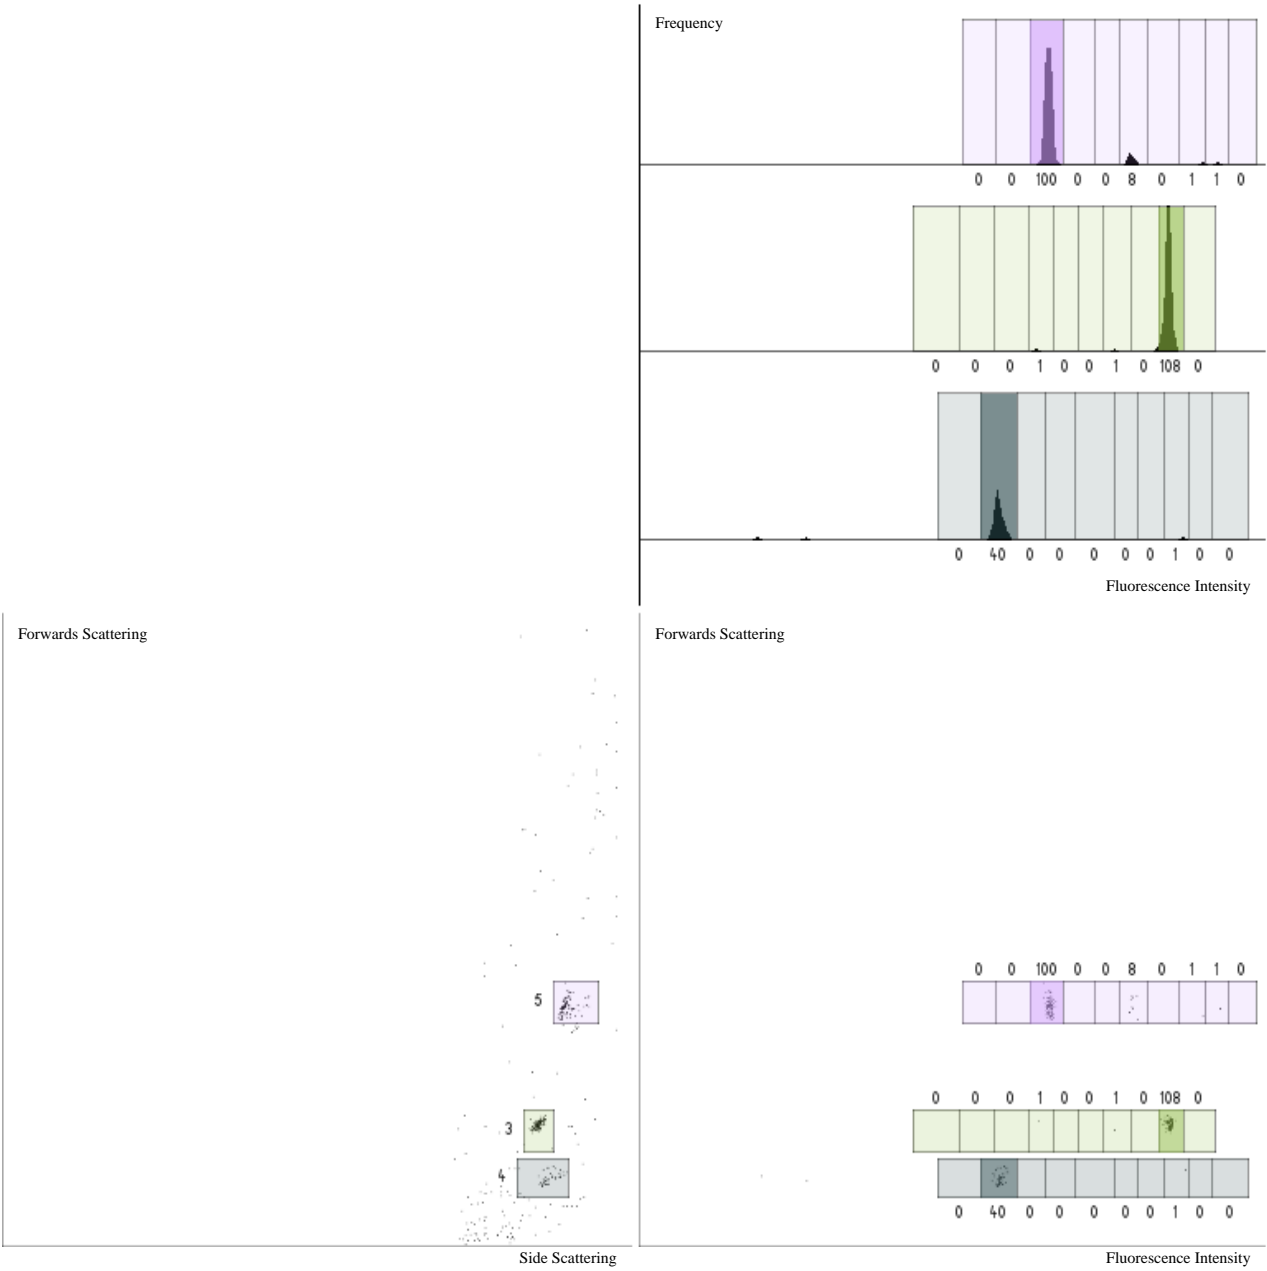

ANNEX 3: TAG DECONVOLUTION - BEAD 201

Passes flow sorting criteria: Yes  
Passes tag deconvolution criteria: Yes  
Included in protocol analysis: Yes  
Protocol: 3, 6, 9, 2  
Filename: Bin2\_plateA2\_B7.fcs  
Split 1: Petrol shading  
Split 2: Green shading  
Split 3: Violet shading

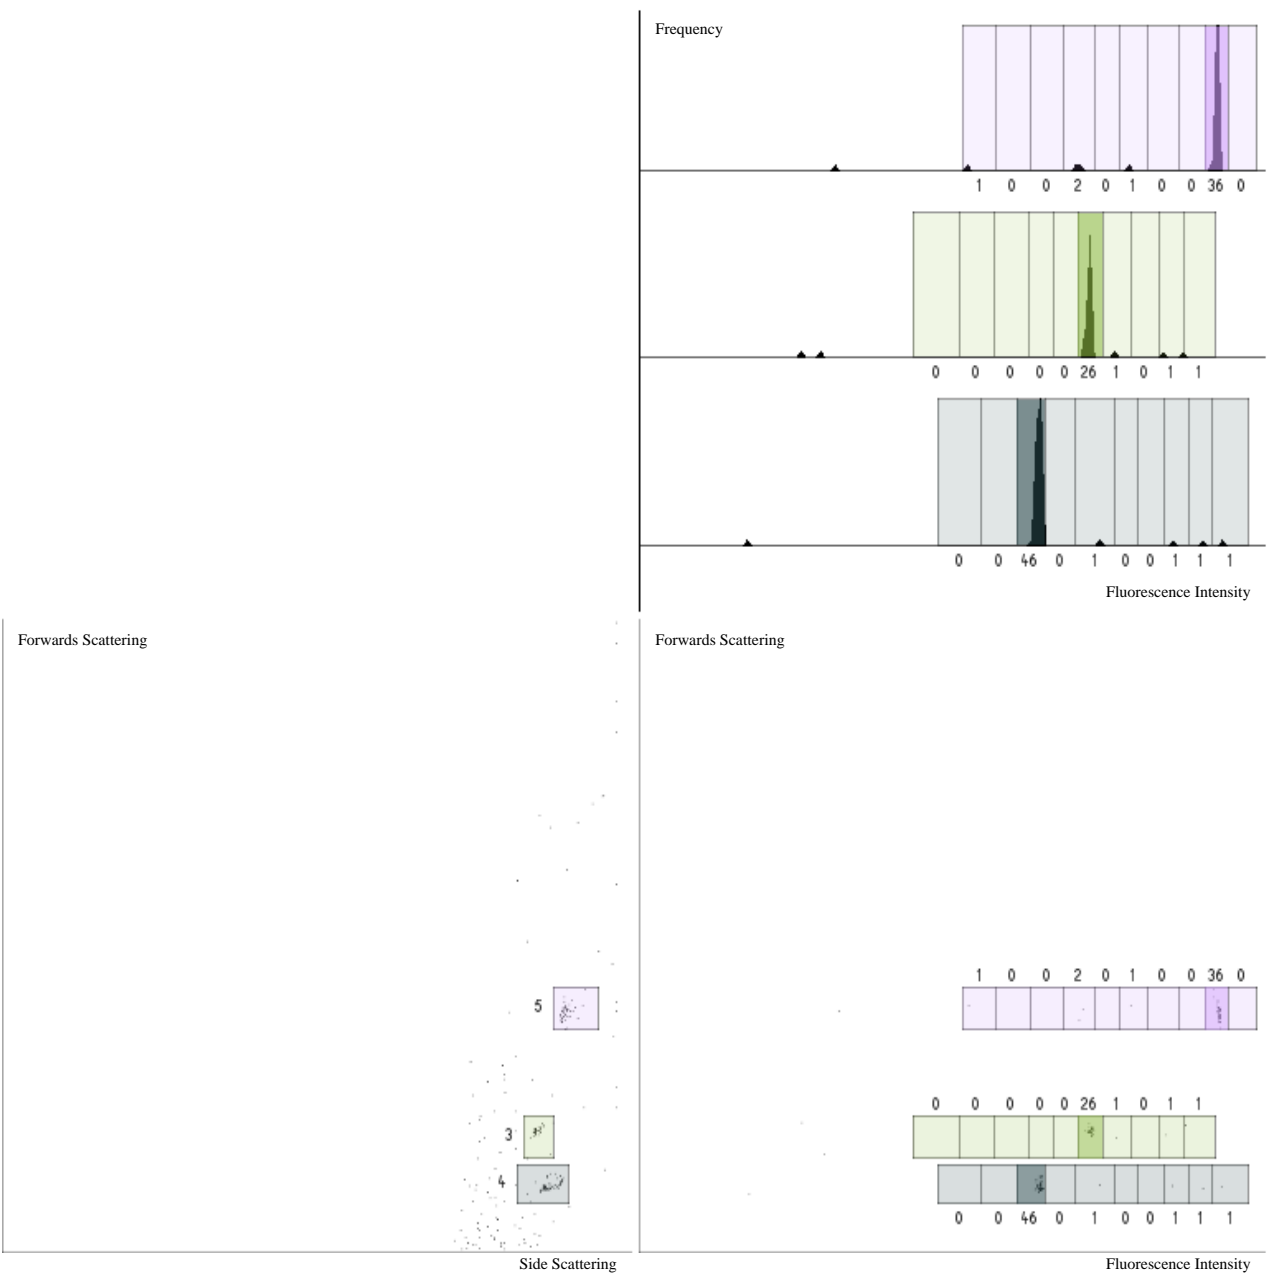

ANNEX 3: TAG DECONVOLUTION - BEAD 202

Passes flow sorting criteria: Yes  
Passes tag deconvolution criteria: No  
Included in protocol analysis: No  
Protocol: N/A  
Filename: Bin2\_plateA2\_B8.fcs  
Split 1: Petrol shading  
Split 2: Green shading  
Split 3: Violet shading

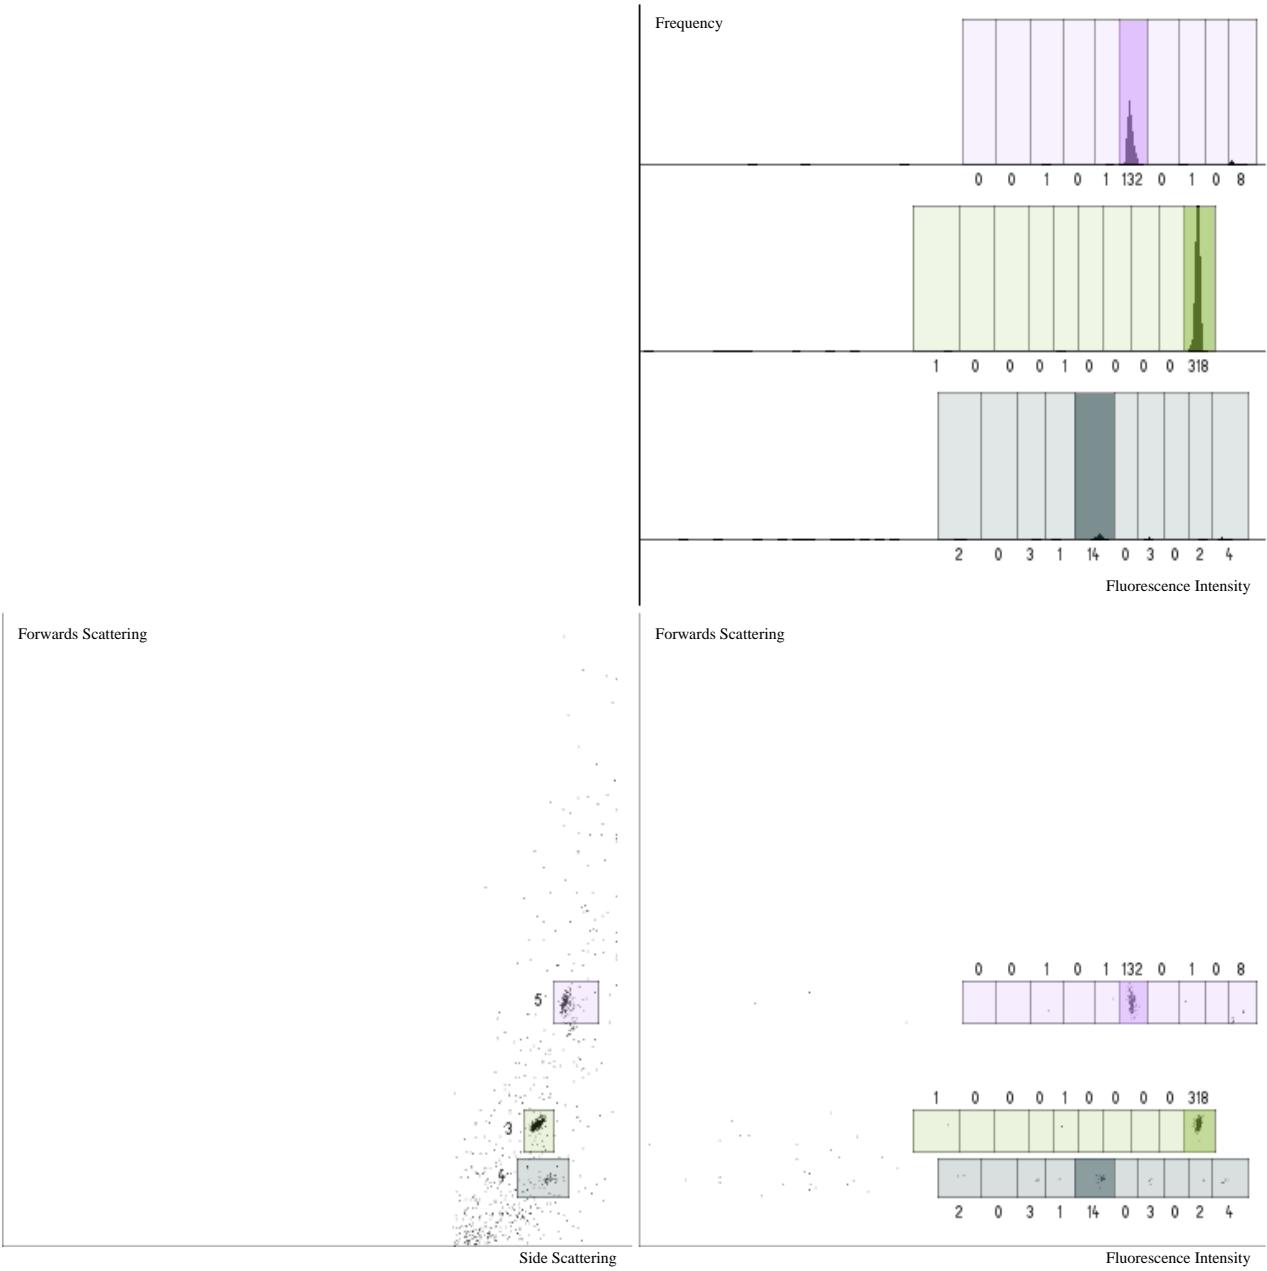

ANNEX 3: TAG DECONVOLUTION - BEAD 203

Passes flow sorting criteria: Yes  
Passes tag deconvolution criteria: Yes  
Included in protocol analysis: Yes  
Protocol: 10, 6, 7, 2  
Filename: Bin2\_plateA2\_B9.fcs  
Split 1: Petrol shading  
Split 2: Green shading  
Split 3: Violet shading

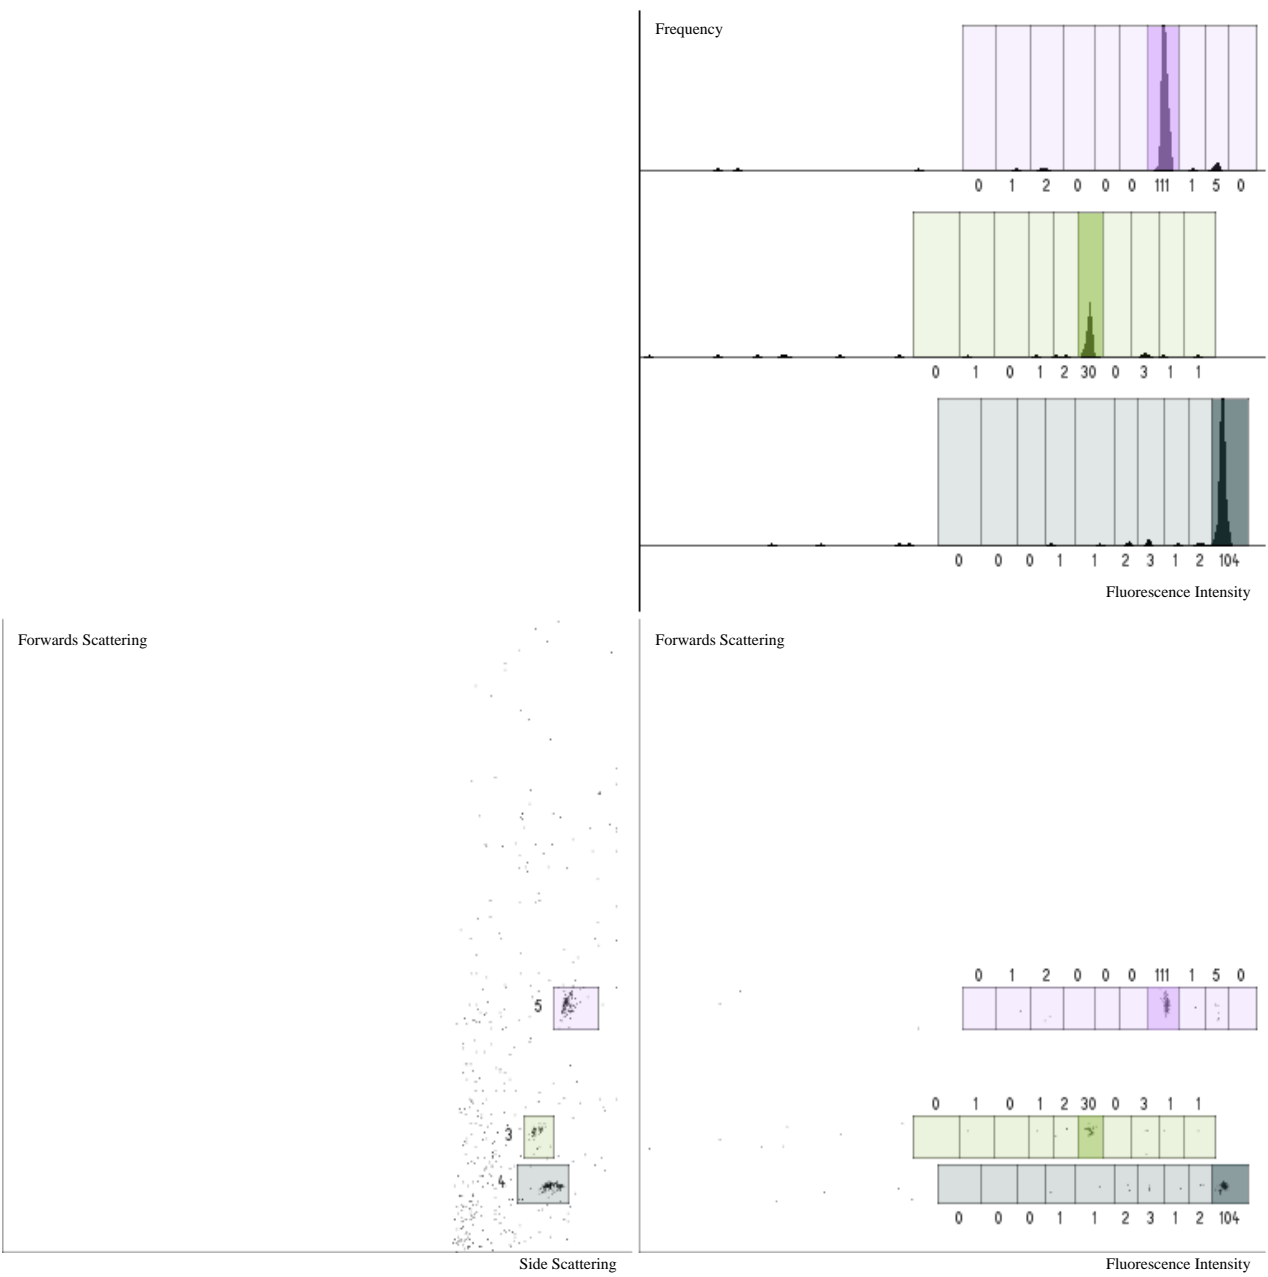

ANNEX 3: TAG DECONVOLUTION - BEAD 204

Passes flow sorting criteria: Yes  
Passes tag deconvolution criteria: Yes  
Included in protocol analysis: Yes  
Protocol: 1, 5, 2, 2  
Filename: Bin2\_plateA2\_B10.fcs  
Split 1: Petrol shading  
Split 2: Green shading  
Split 3: Violet shading

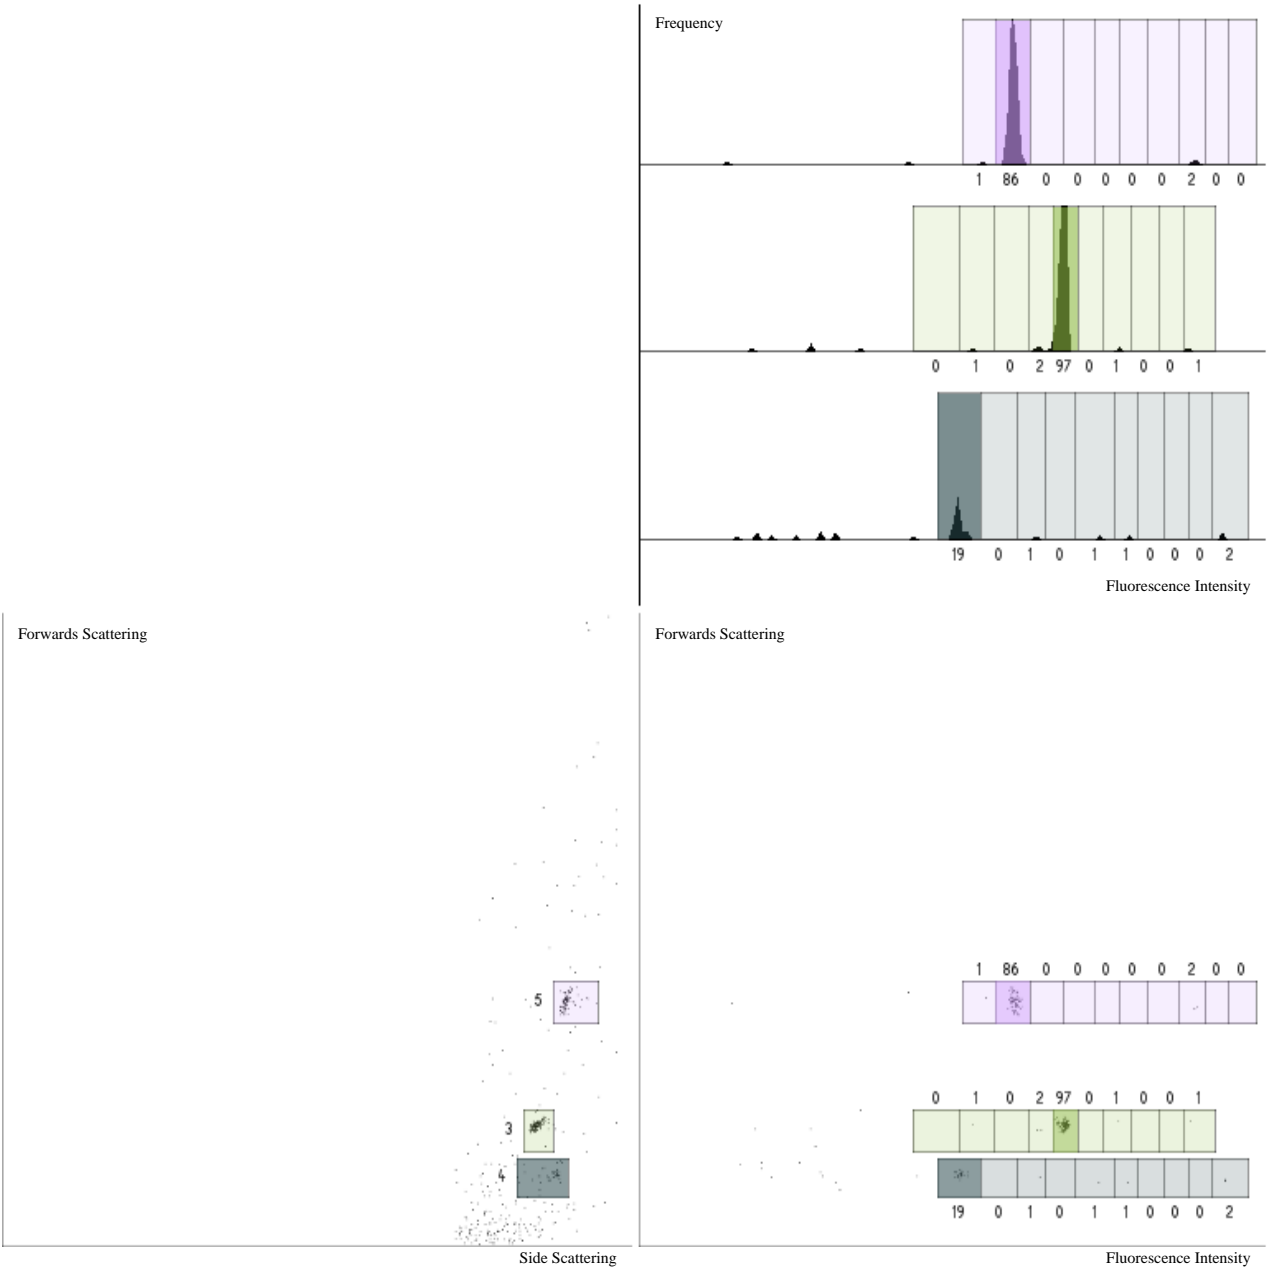

ANNEX 3: TAG DECONVOLUTION - BEAD 205

Passes flow sorting criteria: Yes  
Passes tag deconvolution criteria: No  
Included in protocol analysis: No  
Protocol: N/A  
Filename: Bin2\_plateA2\_B11.fcs  
Split 1: Petrol shading  
Split 2: Green shading  
Split 3: Violet shading

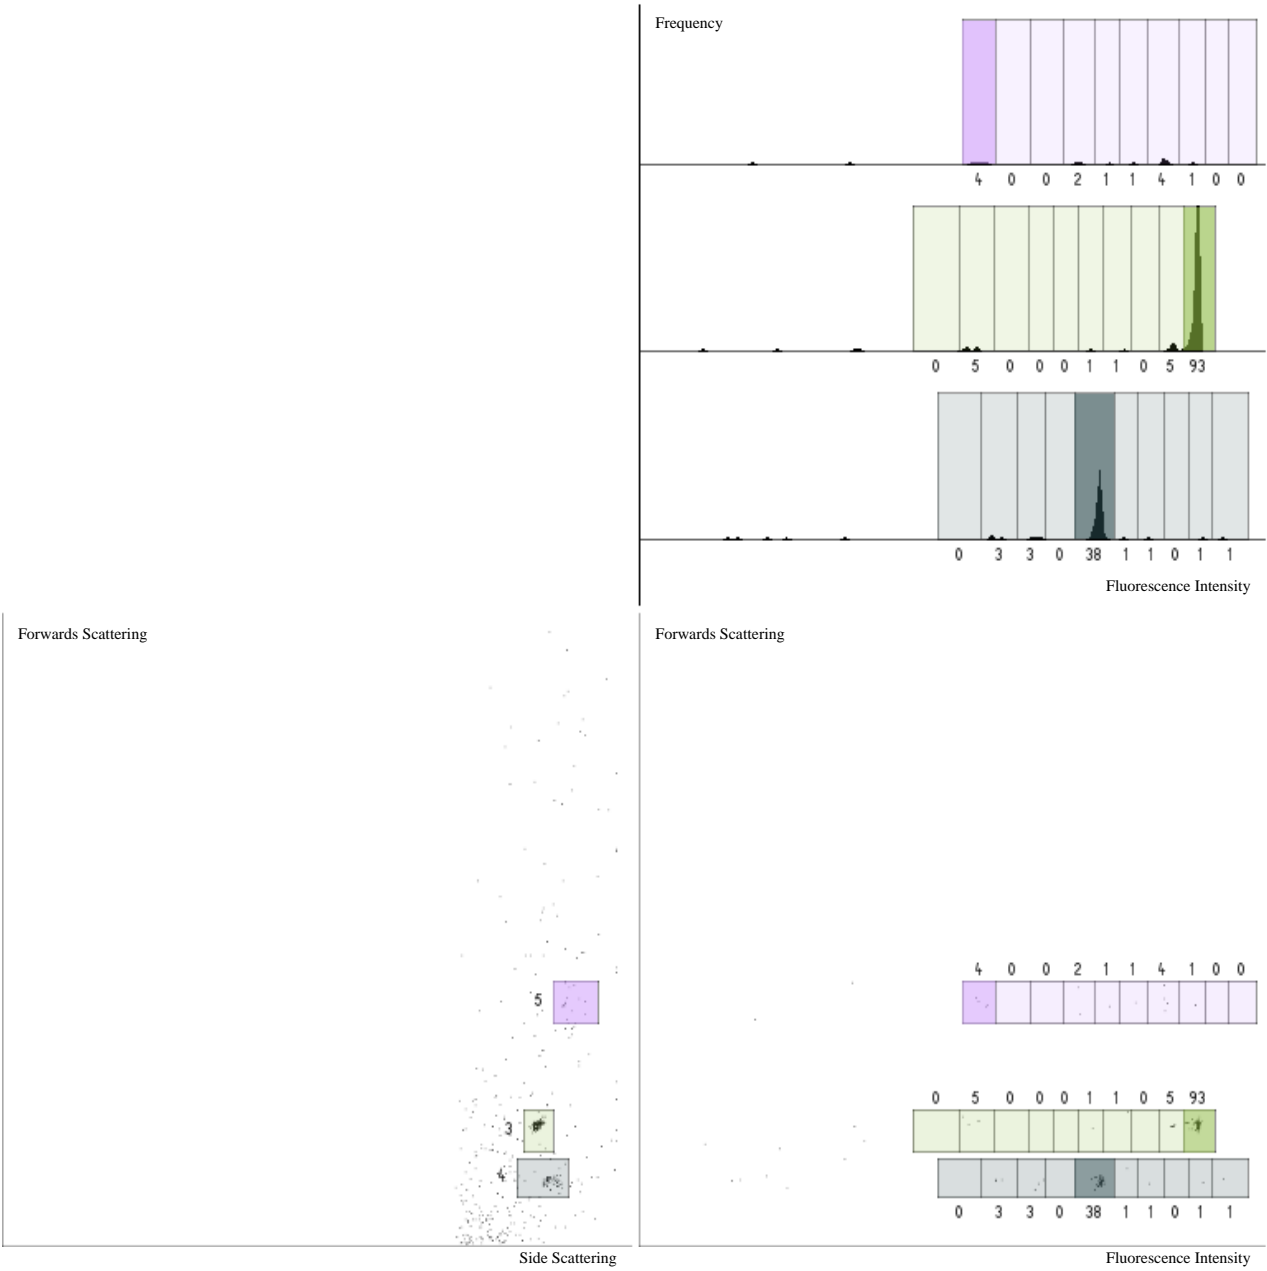

ANNEX 3: TAG DECONVOLUTION - BEAD 206

Passes flow sorting criteria: Yes  
Passes tag deconvolution criteria: Yes  
Included in protocol analysis: Yes  
Protocol: 2, 6, 3, 2  
Filename: Bin2\_plateA2\_B12.fcs  
Split 1: Petrol shading  
Split 2: Green shading  
Split 3: Violet shading

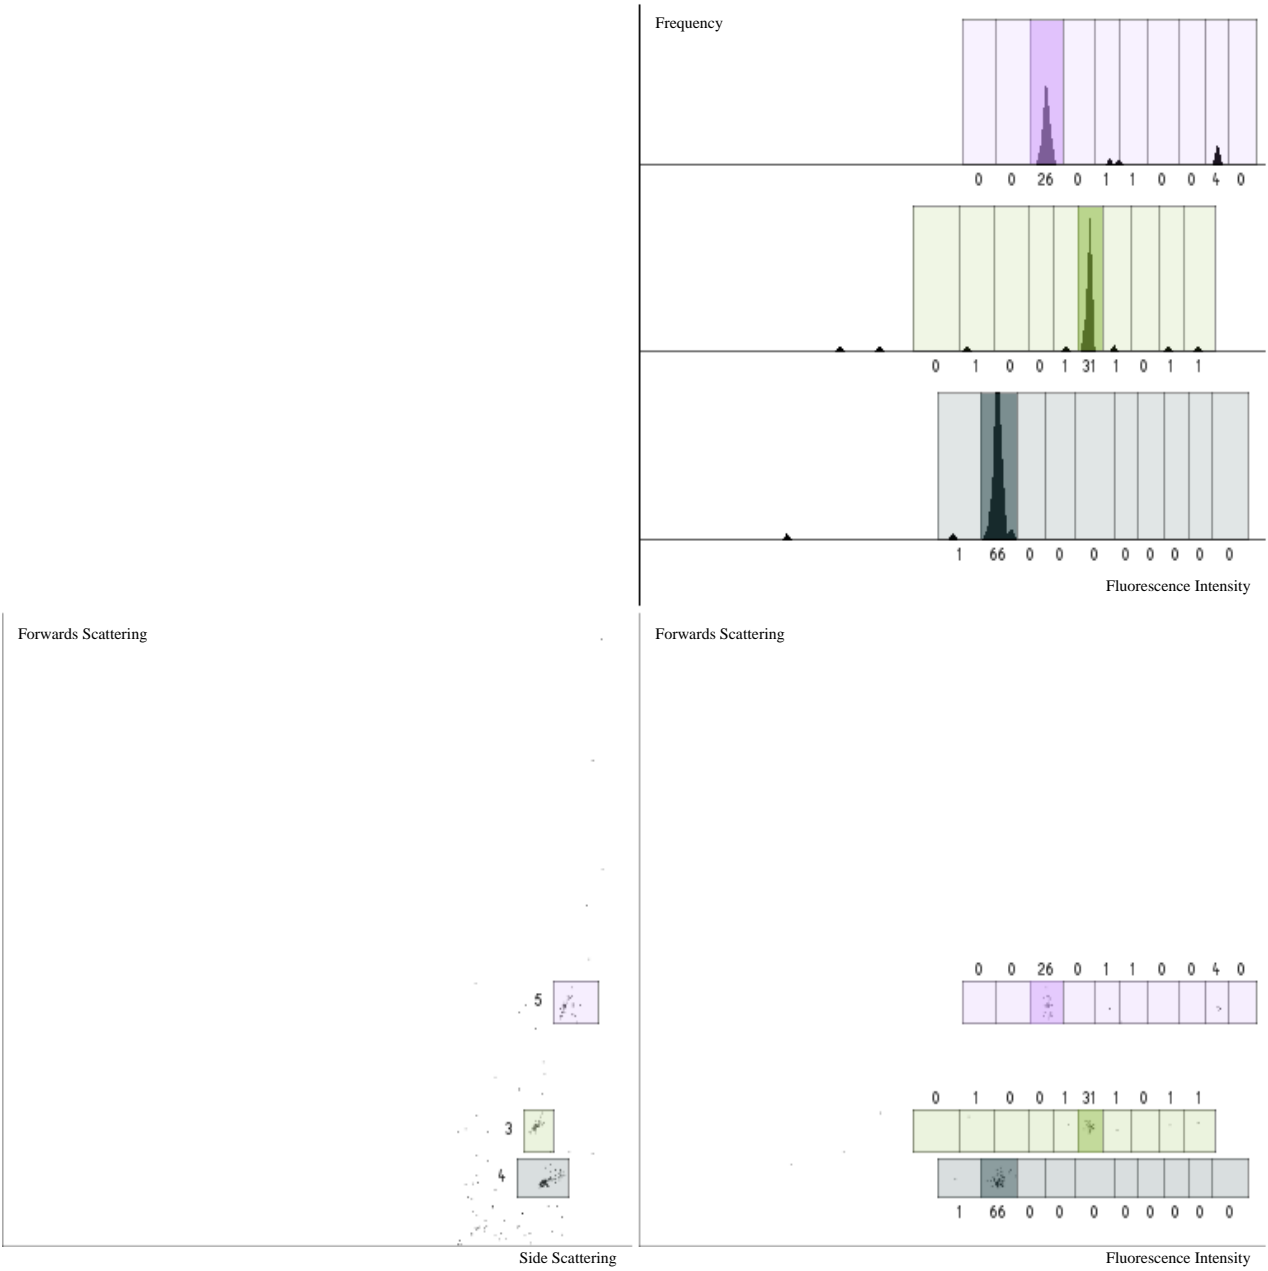



ANNEX 3: TAG DECONVOLUTION - BEAD 207

Passes flow sorting criteria: Yes  
Passes tag deconvolution criteria: Yes  
Included in protocol analysis: Yes  
Protocol: 9, 10, 5, 2  
Filename: Bin2\_plateA2\_C1.fcs  
Split 1: Petrol shading  
Split 2: Green shading  
Split 3: Violet shading

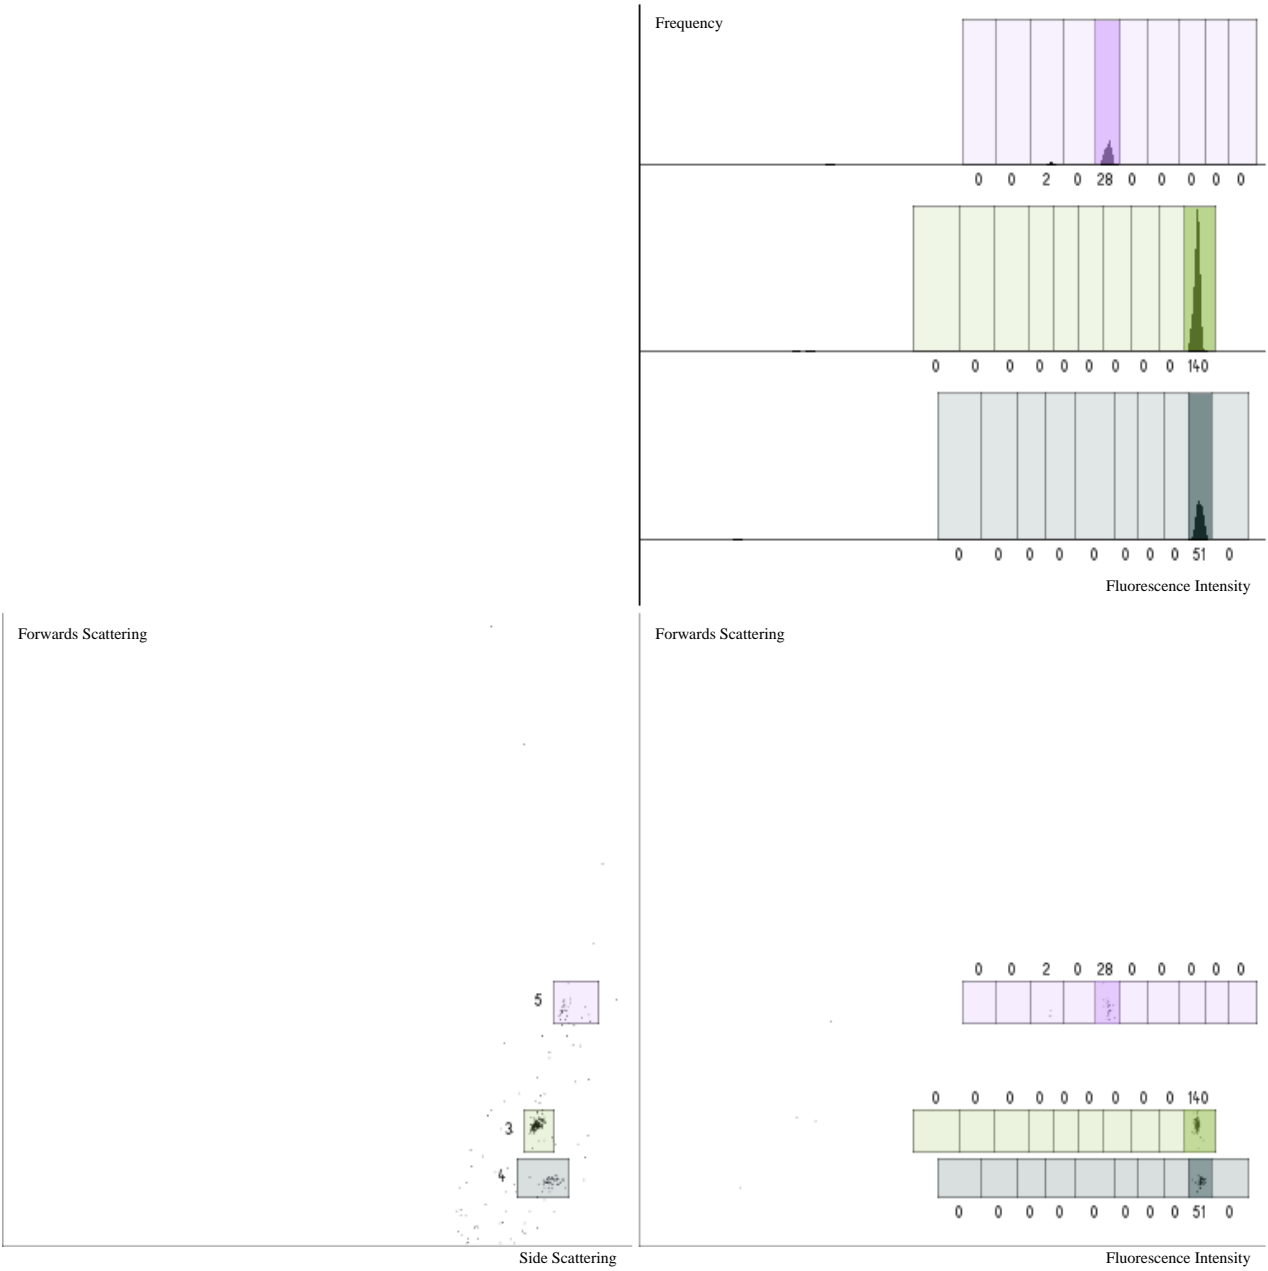

ANNEX 3: TAG DECONVOLUTION - BEAD 208

Passes flow sorting criteria: Yes  
Passes tag deconvolution criteria: Yes  
Included in protocol analysis: Yes  
Protocol: 5, 10, 3, 2  
Filename: Bin2\_plateA2\_C2.fcs  
Split 1: Petrol shading  
Split 2: Green shading  
Split 3: Violet shading

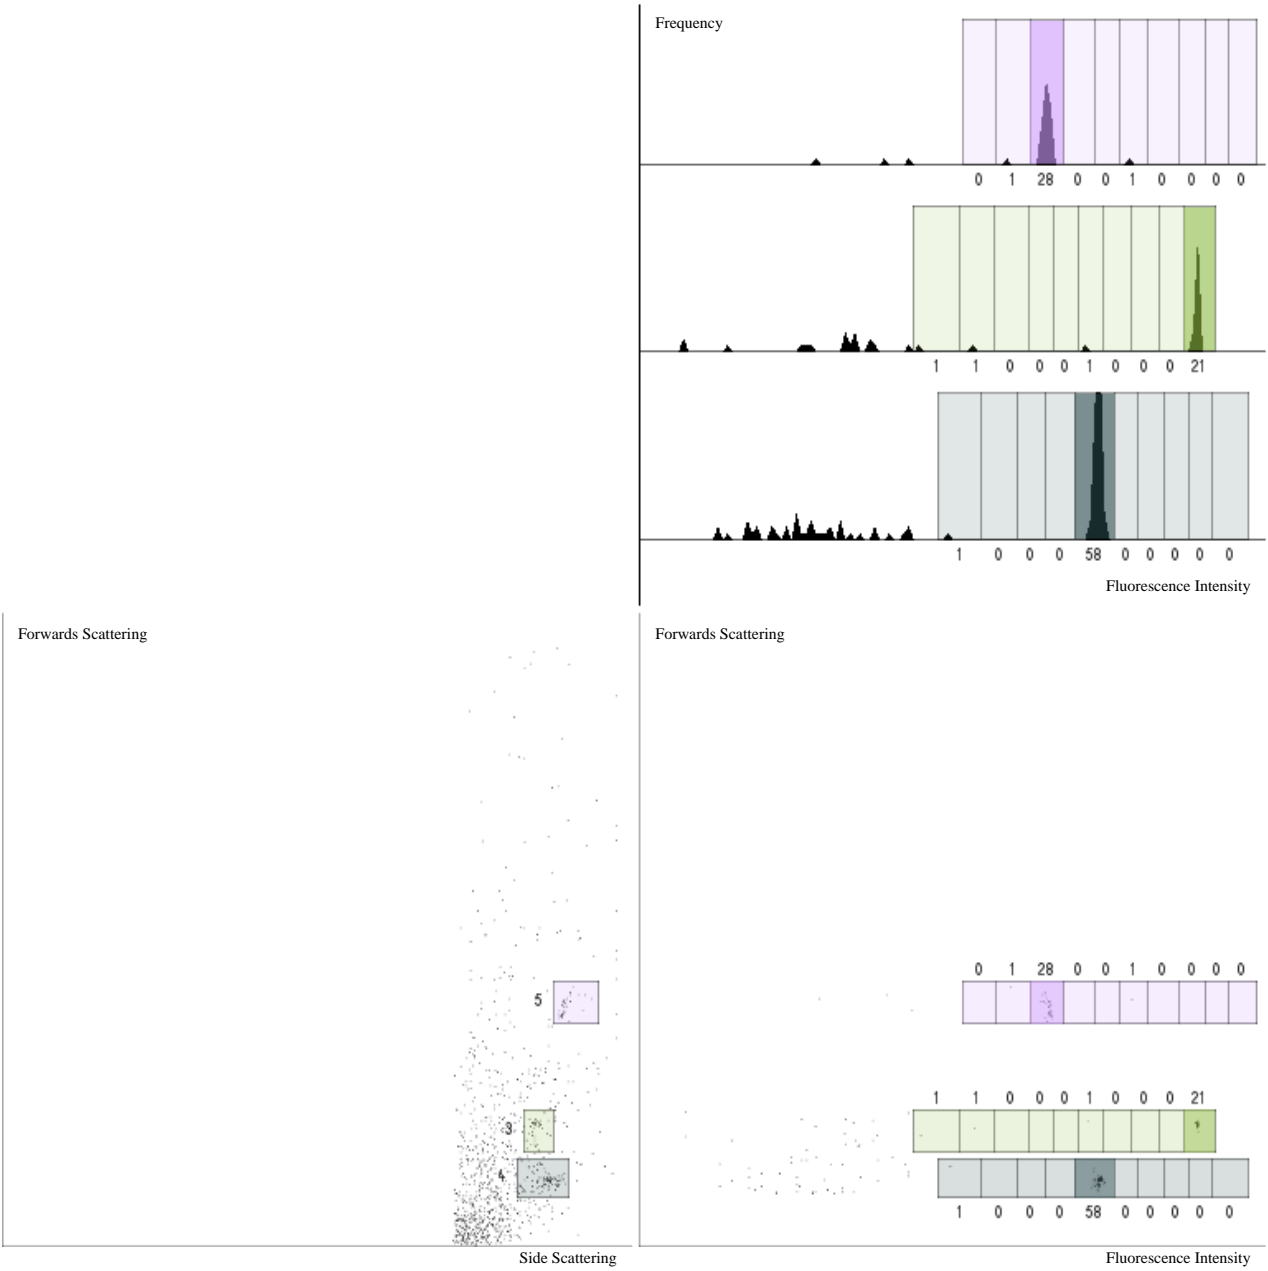

ANNEX 3: TAG DECONVOLUTION - BEAD 209

Passes flow sorting criteria: Yes  
Passes tag deconvolution criteria: Yes  
Included in protocol analysis: Yes  
Protocol: 8, 6, 10, 2  
Filename: Bin2\_plateA2\_C3.fcs  
Split 1: Petrol shading  
Split 2: Green shading  
Split 3: Violet shading

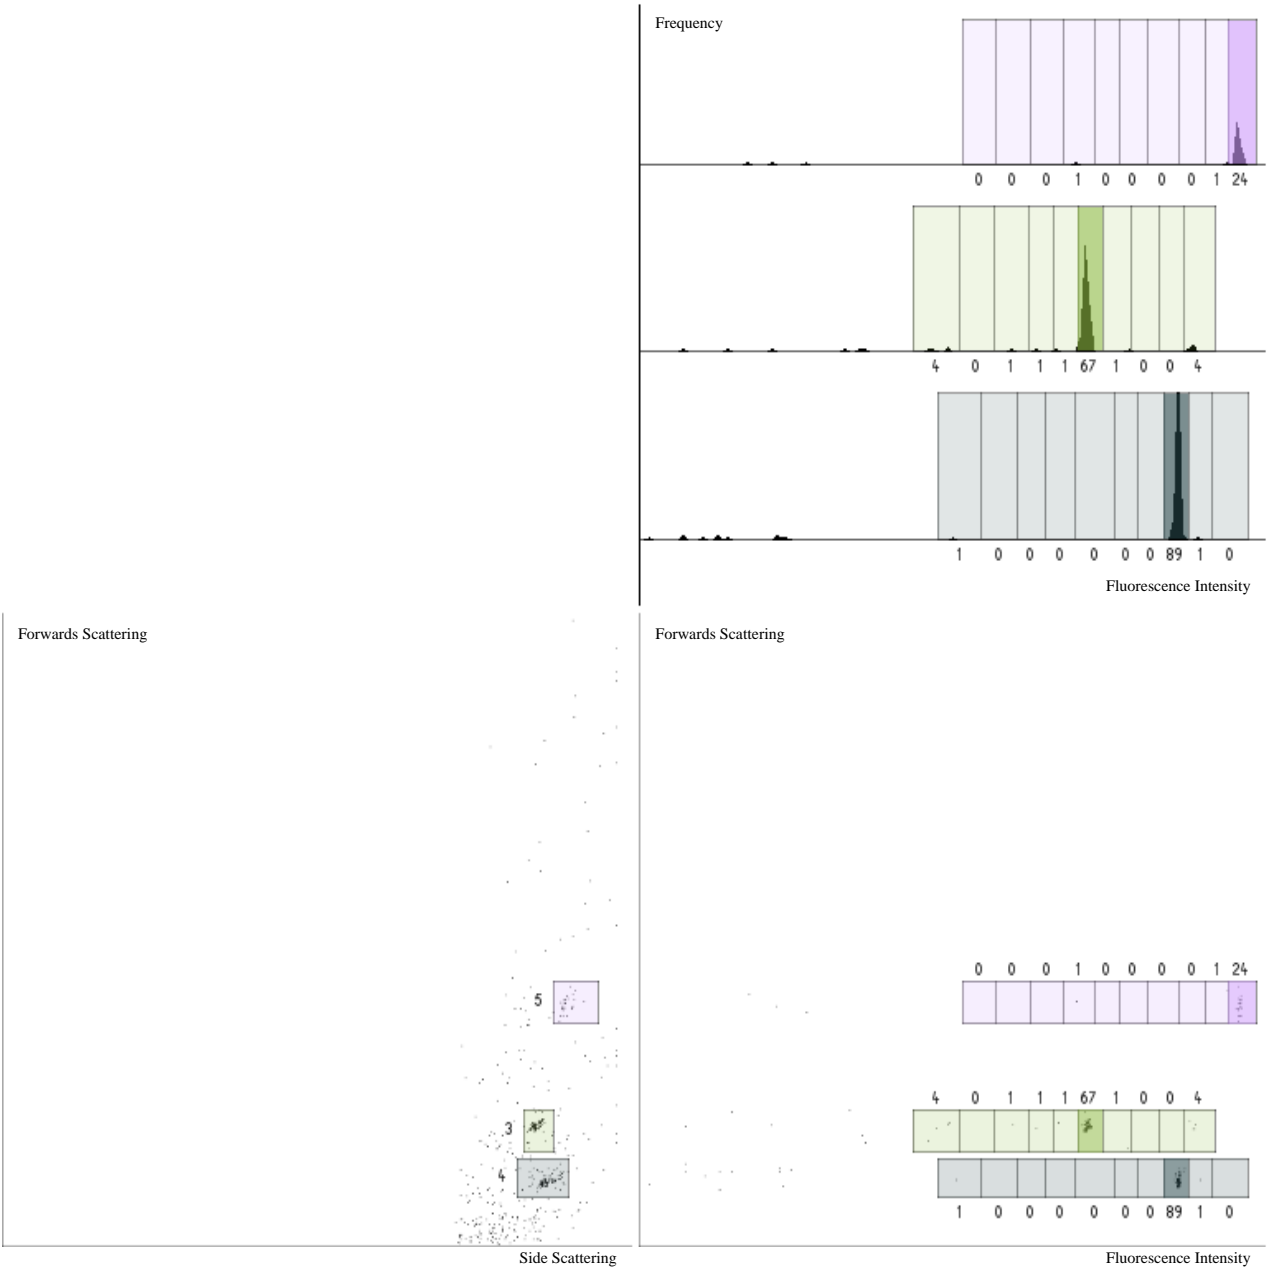

ANNEX 3: TAG DECONVOLUTION - BEAD 210

Passes flow sorting criteria: Yes  
Passes tag deconvolution criteria: Yes  
Included in protocol analysis: Yes  
Protocol: 10, 10, 5, 2  
Filename: Bin2\_plateA2\_C4.fcs  
Split 1: Petrol shading  
Split 2: Green shading  
Split 3: Violet shading

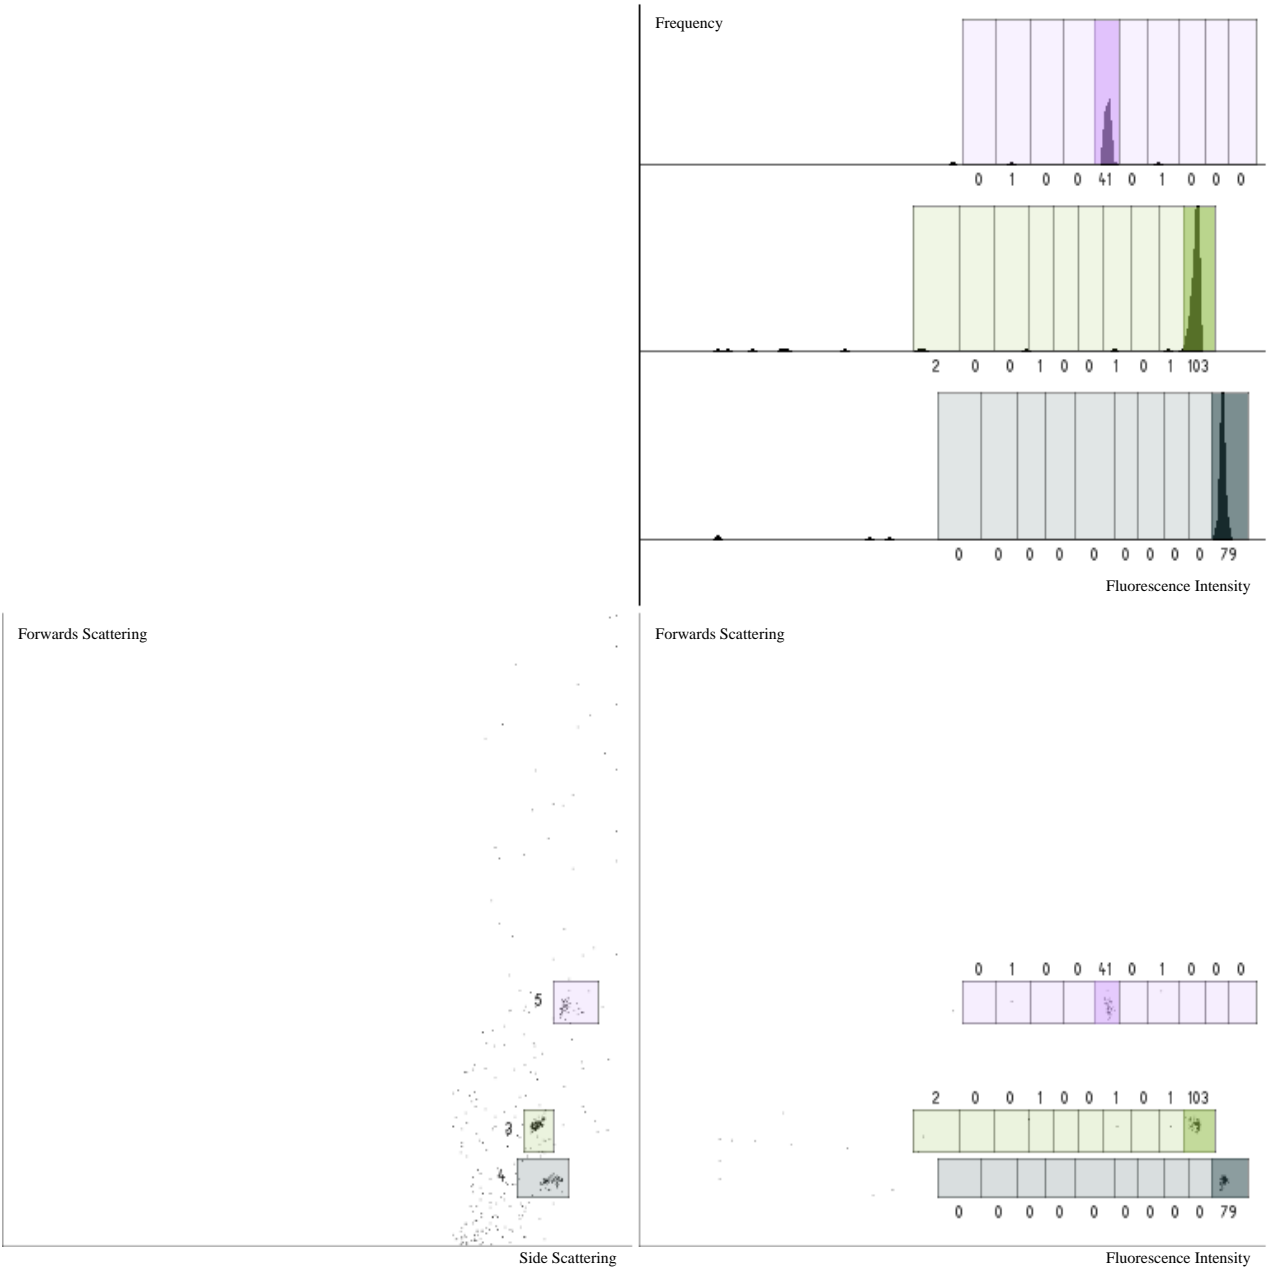

ANNEX 3: TAG DECONVOLUTION - BEAD 211

Passes flow sorting criteria: Yes  
Passes tag deconvolution criteria: Yes  
Included in protocol analysis: Yes  
Protocol: 10, 6, 9, 2  
Filename: Bin2\_plateA2\_C5.fcs  
Split 1: Petrol shading  
Split 2: Green shading  
Split 3: Violet shading

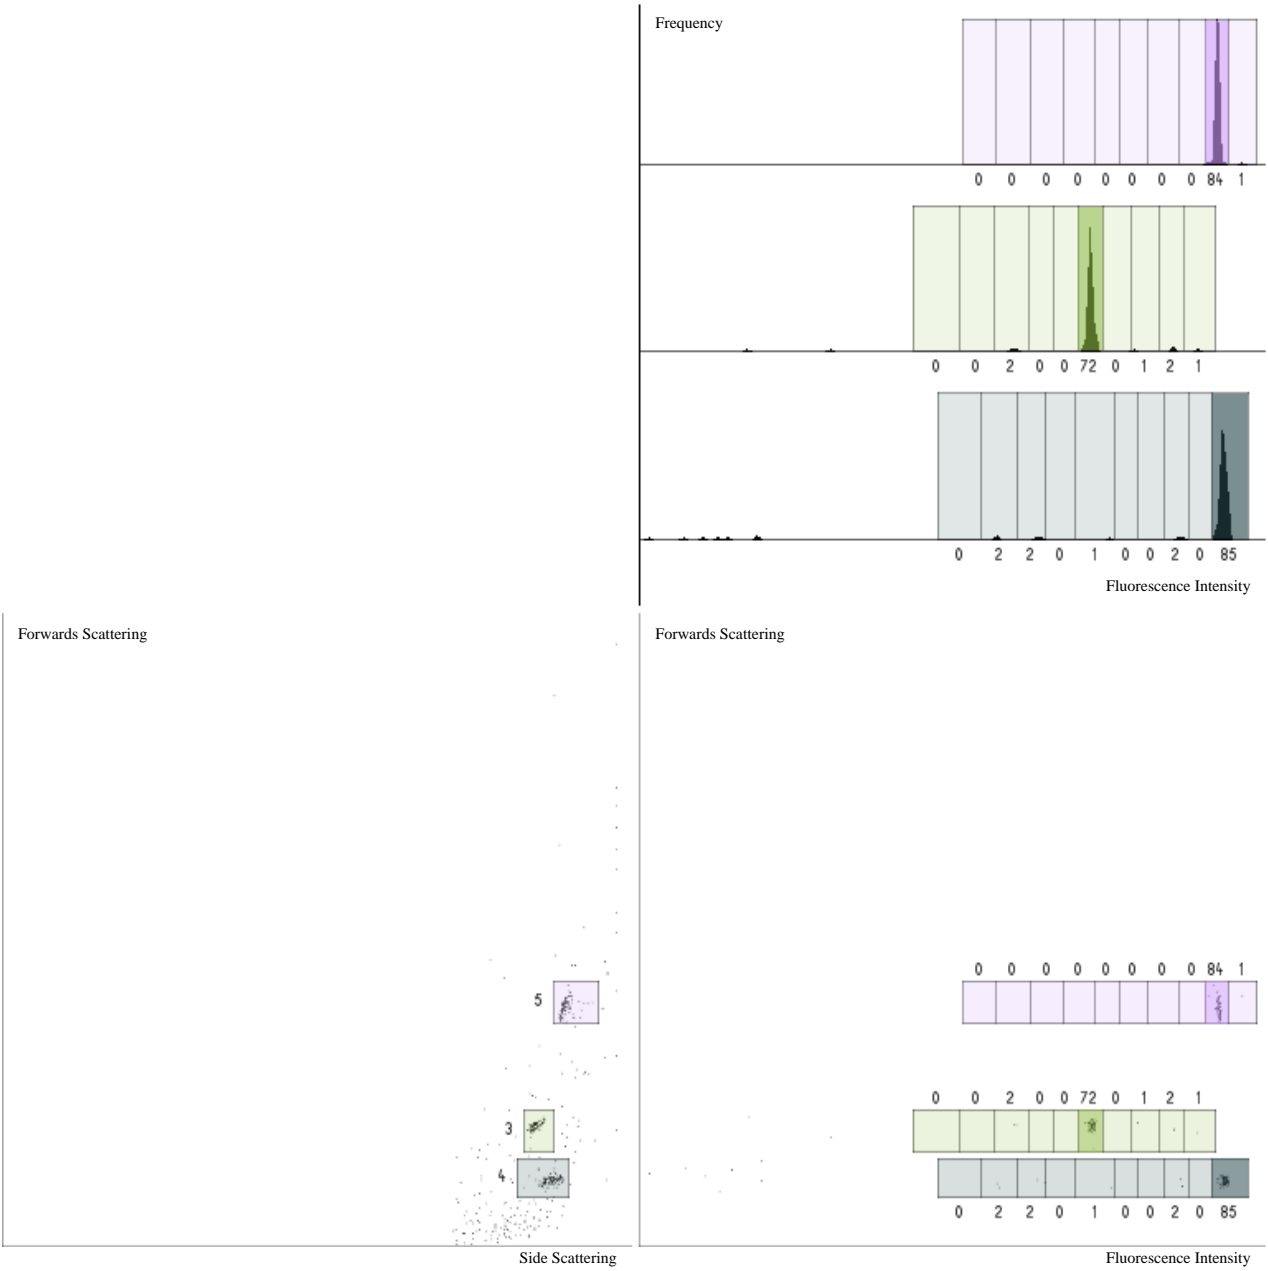

ANNEX 3: TAG DECONVOLUTION - BEAD 212

Passes flow sorting criteria: Yes  
Passes tag deconvolution criteria: Yes  
Included in protocol analysis: Yes  
Protocol: 5, 10, 7, 2  
Filename: Bin2\_plateA2\_C6.fcs  
Split 1: Petrol shading  
Split 2: Green shading  
Split 3: Violet shading

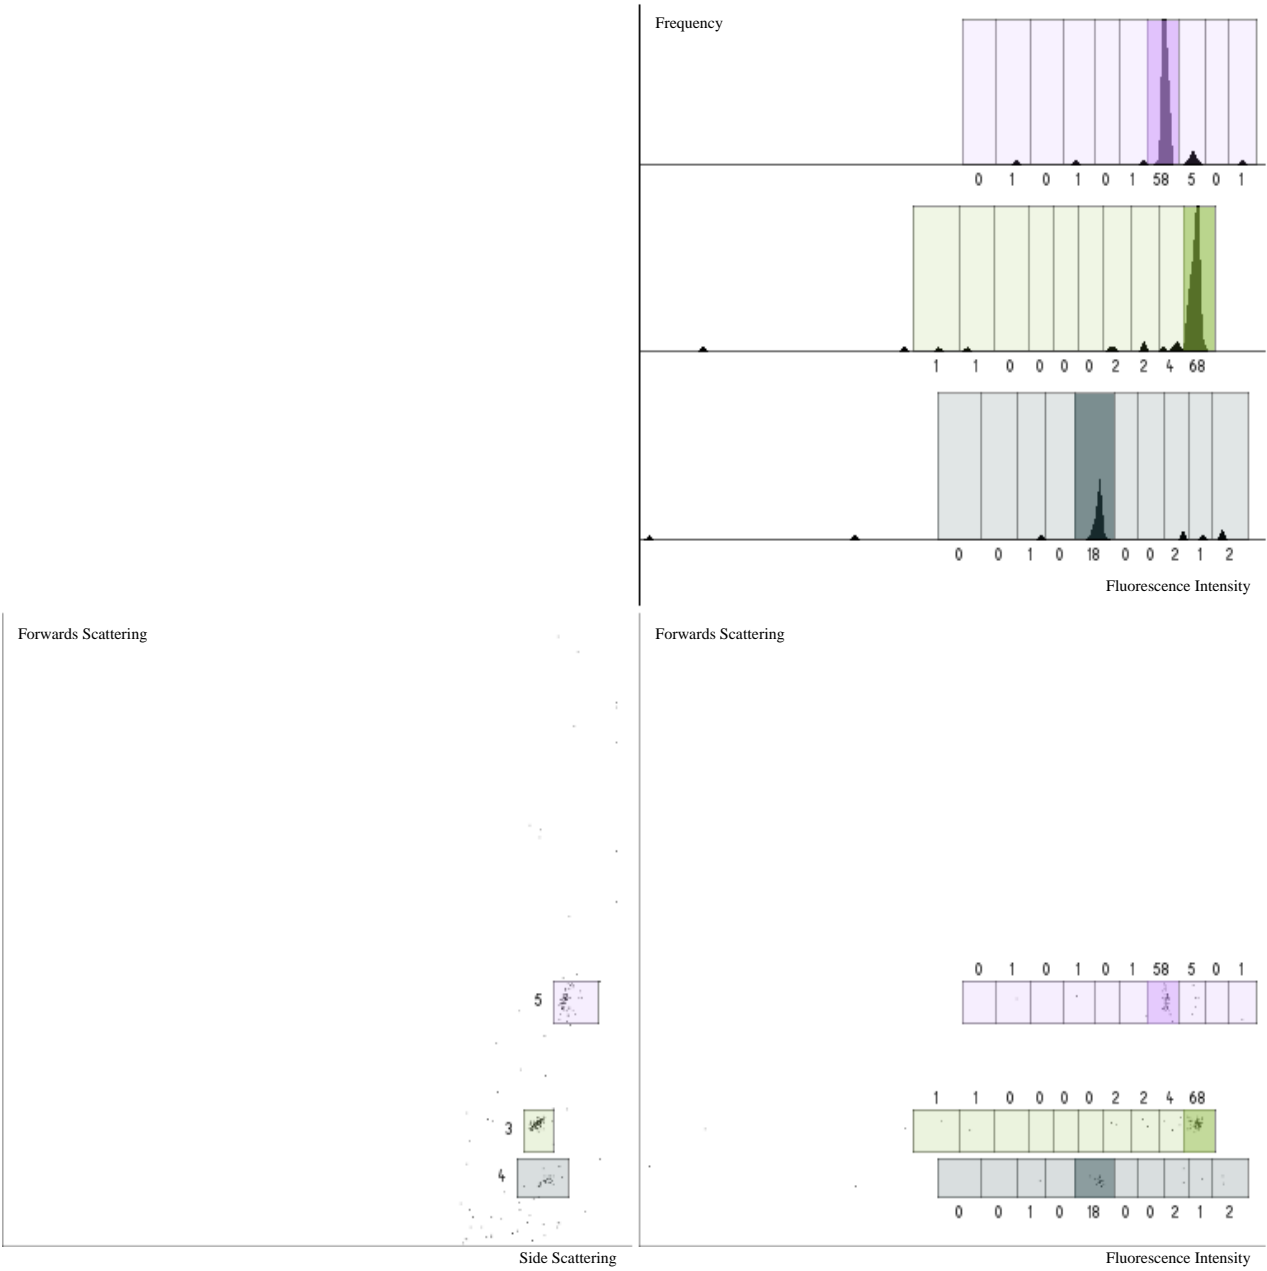

ANNEX 3: TAG DECONVOLUTION - BEAD 213

Passes flow sorting criteria: Yes  
Passes tag deconvolution criteria: Yes  
Included in protocol analysis: Yes  
Protocol: 6, 6, 3, 2  
Filename: Bin2\_plateA2\_C7.fcs  
Split 1: Petrol shading  
Split 2: Green shading  
Split 3: Violet shading

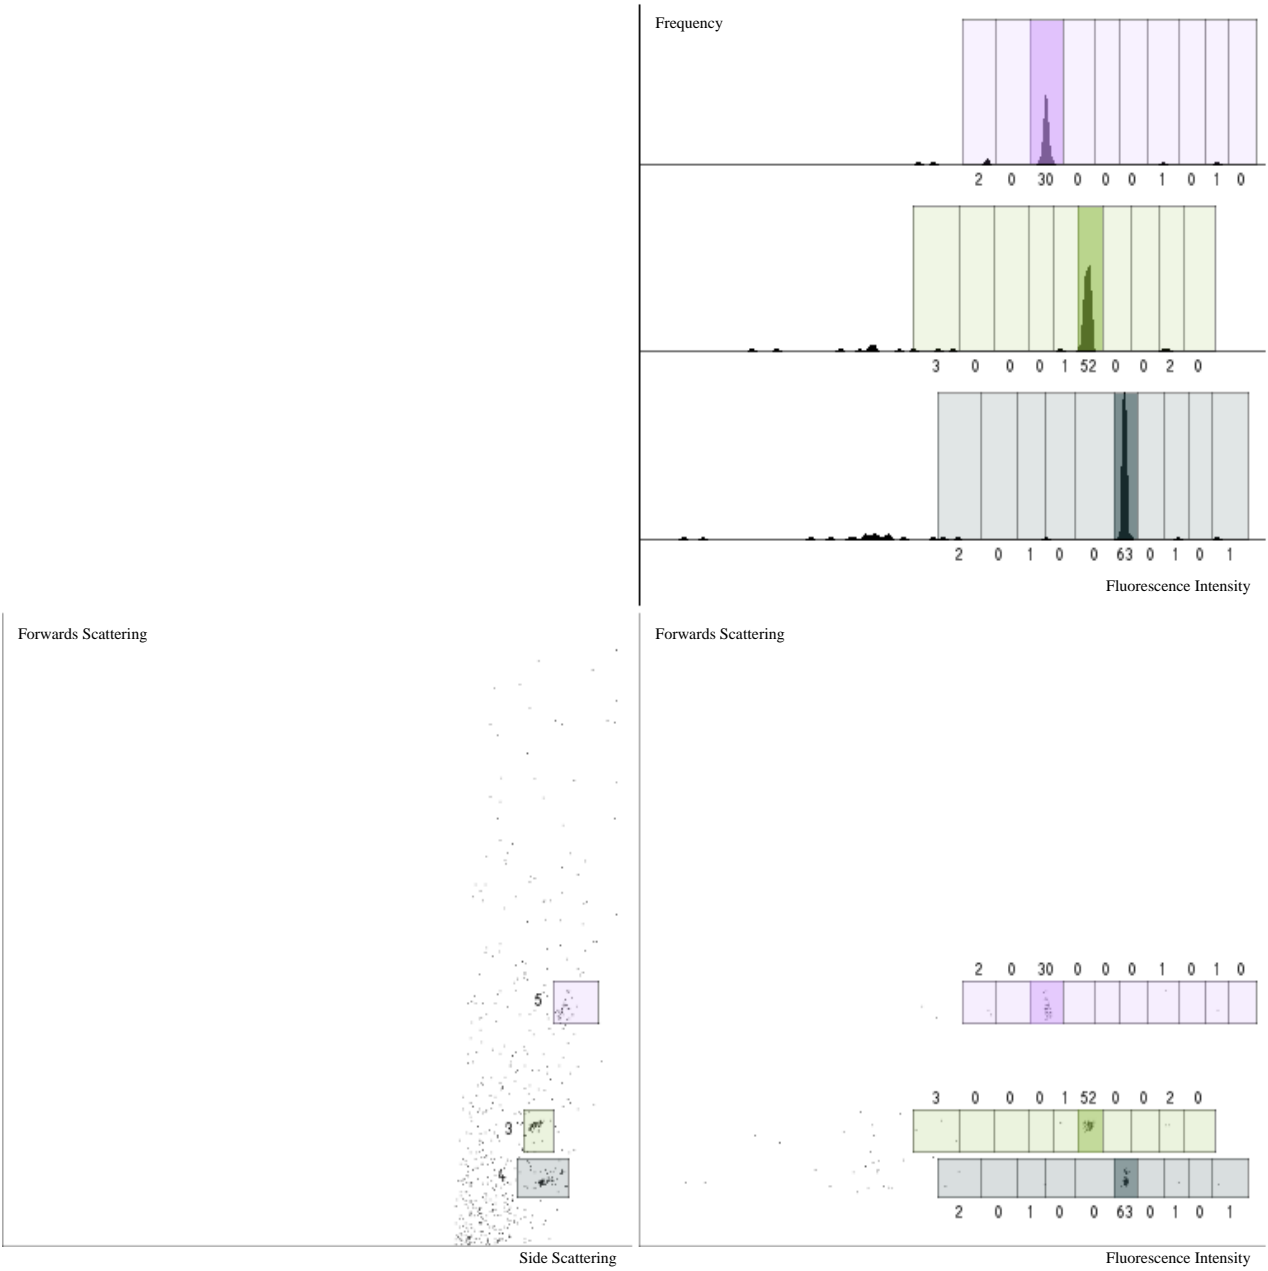

ANNEX 3: TAG DECONVOLUTION - BEAD 214

Passes flow sorting criteria: Yes  
Passes tag deconvolution criteria: Yes  
Included in protocol analysis: Yes  
Protocol: 4, 10, 3, 2  
Filename: Bin2\_plateA2\_C8.fcs  
Split 1: Petrol shading  
Split 2: Green shading  
Split 3: Violet shading

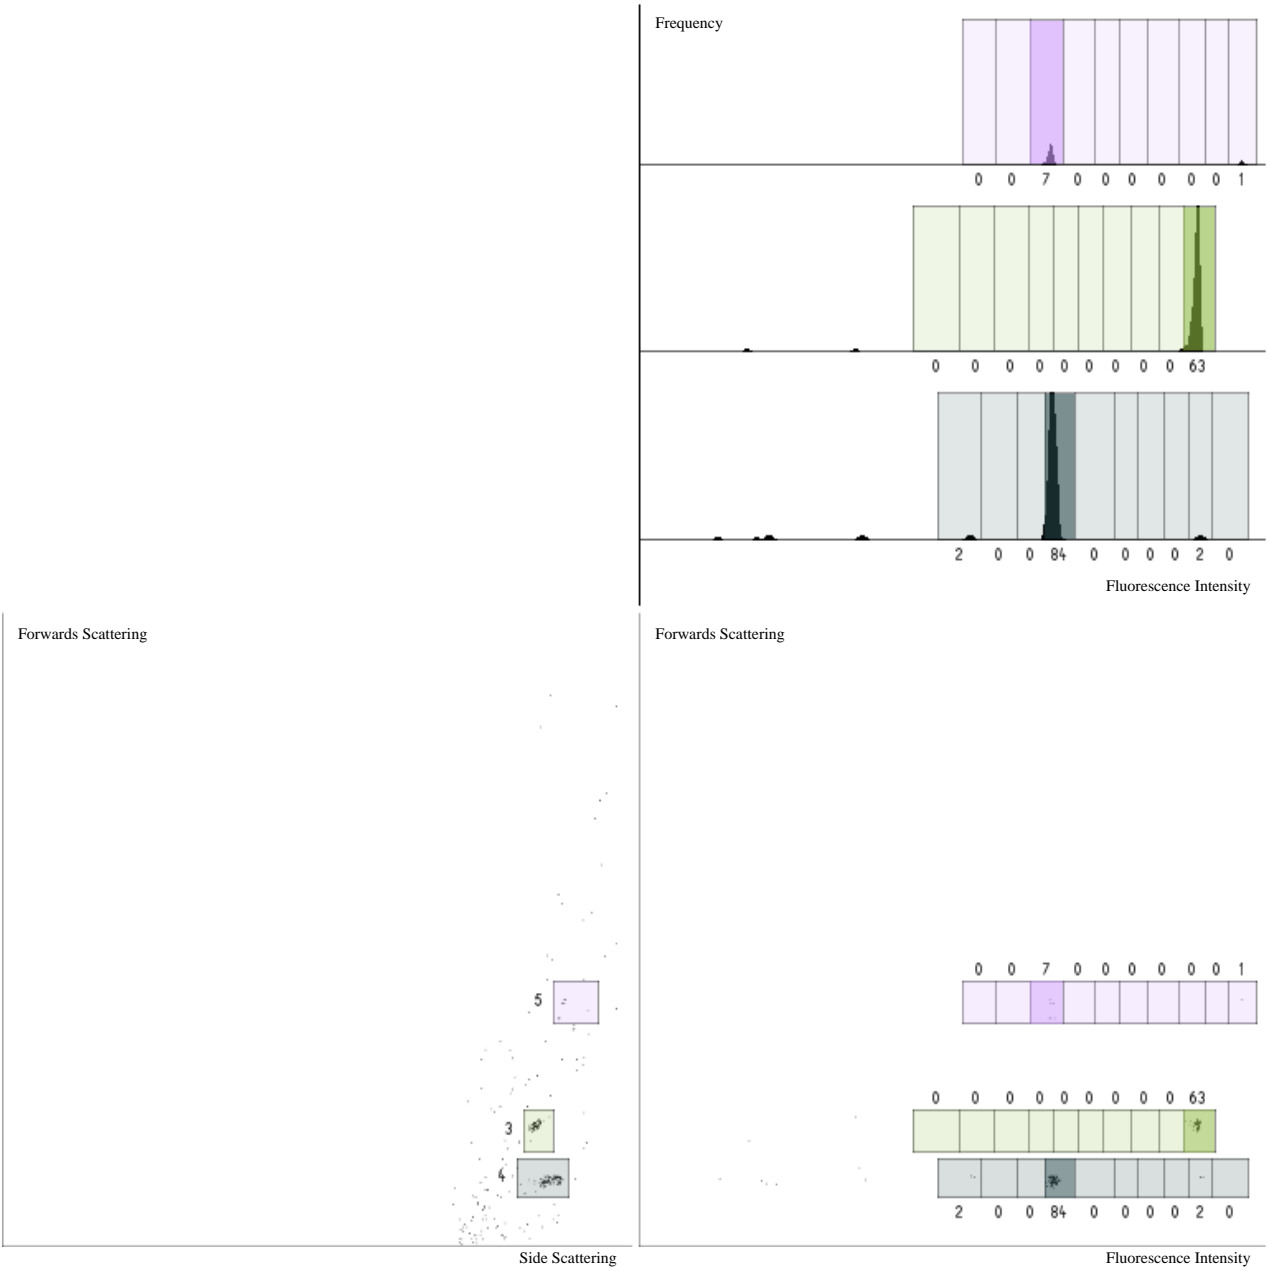



ANNEX 3: TAG DECONVOLUTION - BEAD 215

Passes flow sorting criteria: Yes  
Passes tag deconvolution criteria: Yes  
Included in protocol analysis: Yes  
Protocol: 7, 4, 2, 2  
Filename: Bin2\_plateA2\_C9.fcs  
Split 1: Petrol shading  
Split 2: Green shading  
Split 3: Violet shading

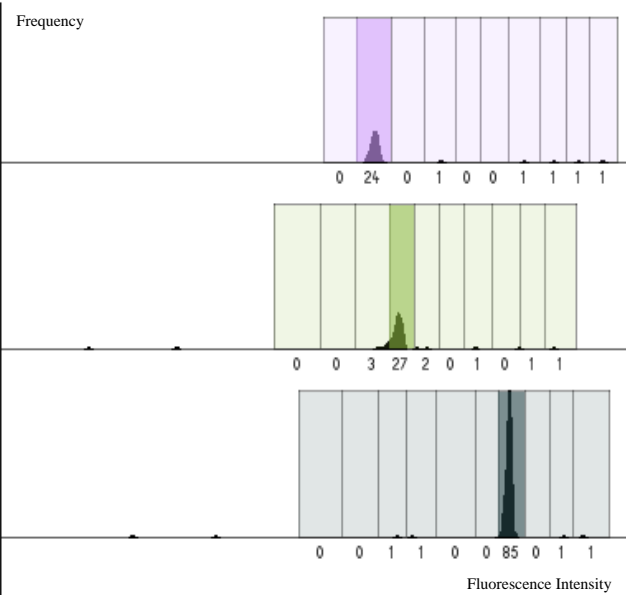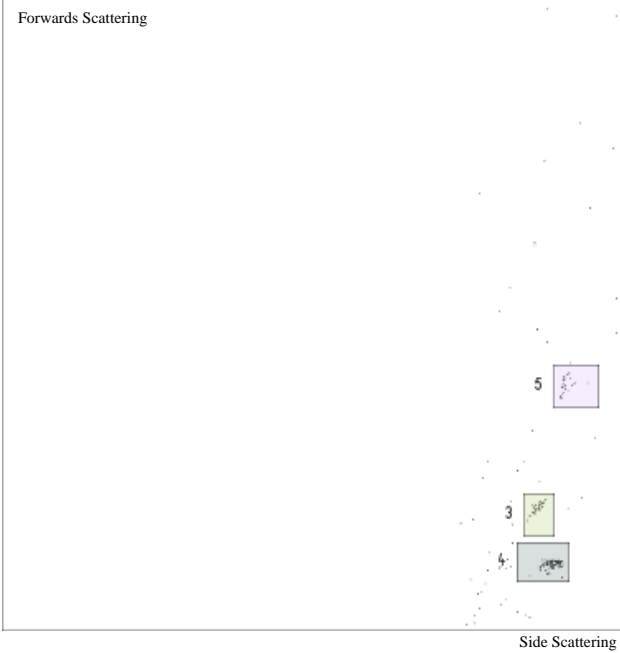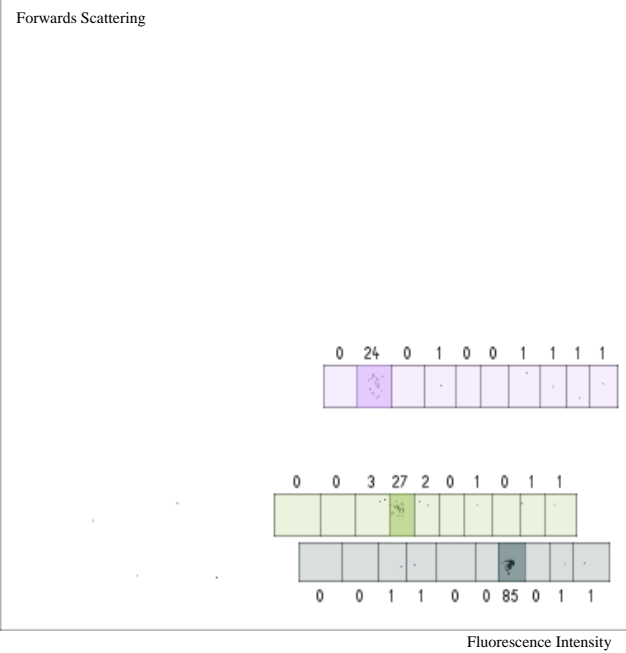

ANNEX 3: TAG DECONVOLUTION - BEAD 216

Passes flow sorting criteria: Yes  
Passes tag deconvolution criteria: Yes  
Included in protocol analysis: Yes  
Protocol: 1, 5, 3, 2  
Filename: Bin2\_plateA2\_C10.fcs  
Split 1: Petrol shading  
Split 2: Green shading  
Split 3: Violet shading

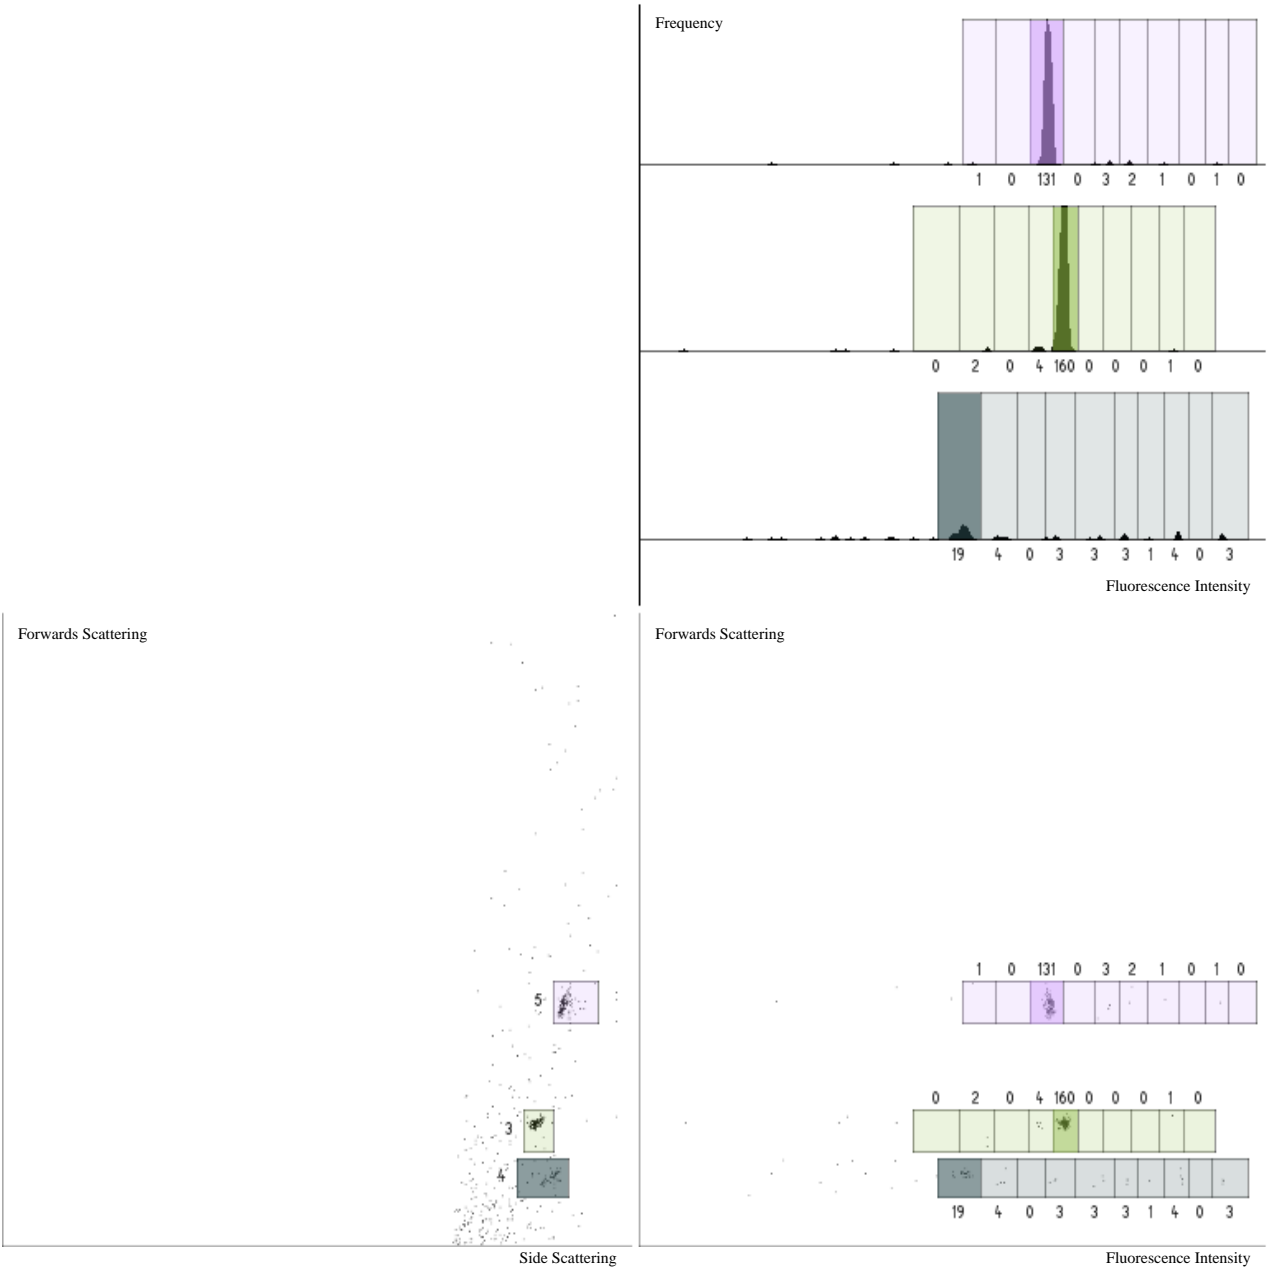

ANNEX 3: TAG DECONVOLUTION - BEAD 217

Passes flow sorting criteria: Yes  
Passes tag deconvolution criteria: Yes  
Included in protocol analysis: Yes  
Protocol: 10, 8, 7, 2  
Filename: Bin2\_plateA2\_C11.fcs  
Split 1: Petrol shading  
Split 2: Green shading  
Split 3: Violet shading

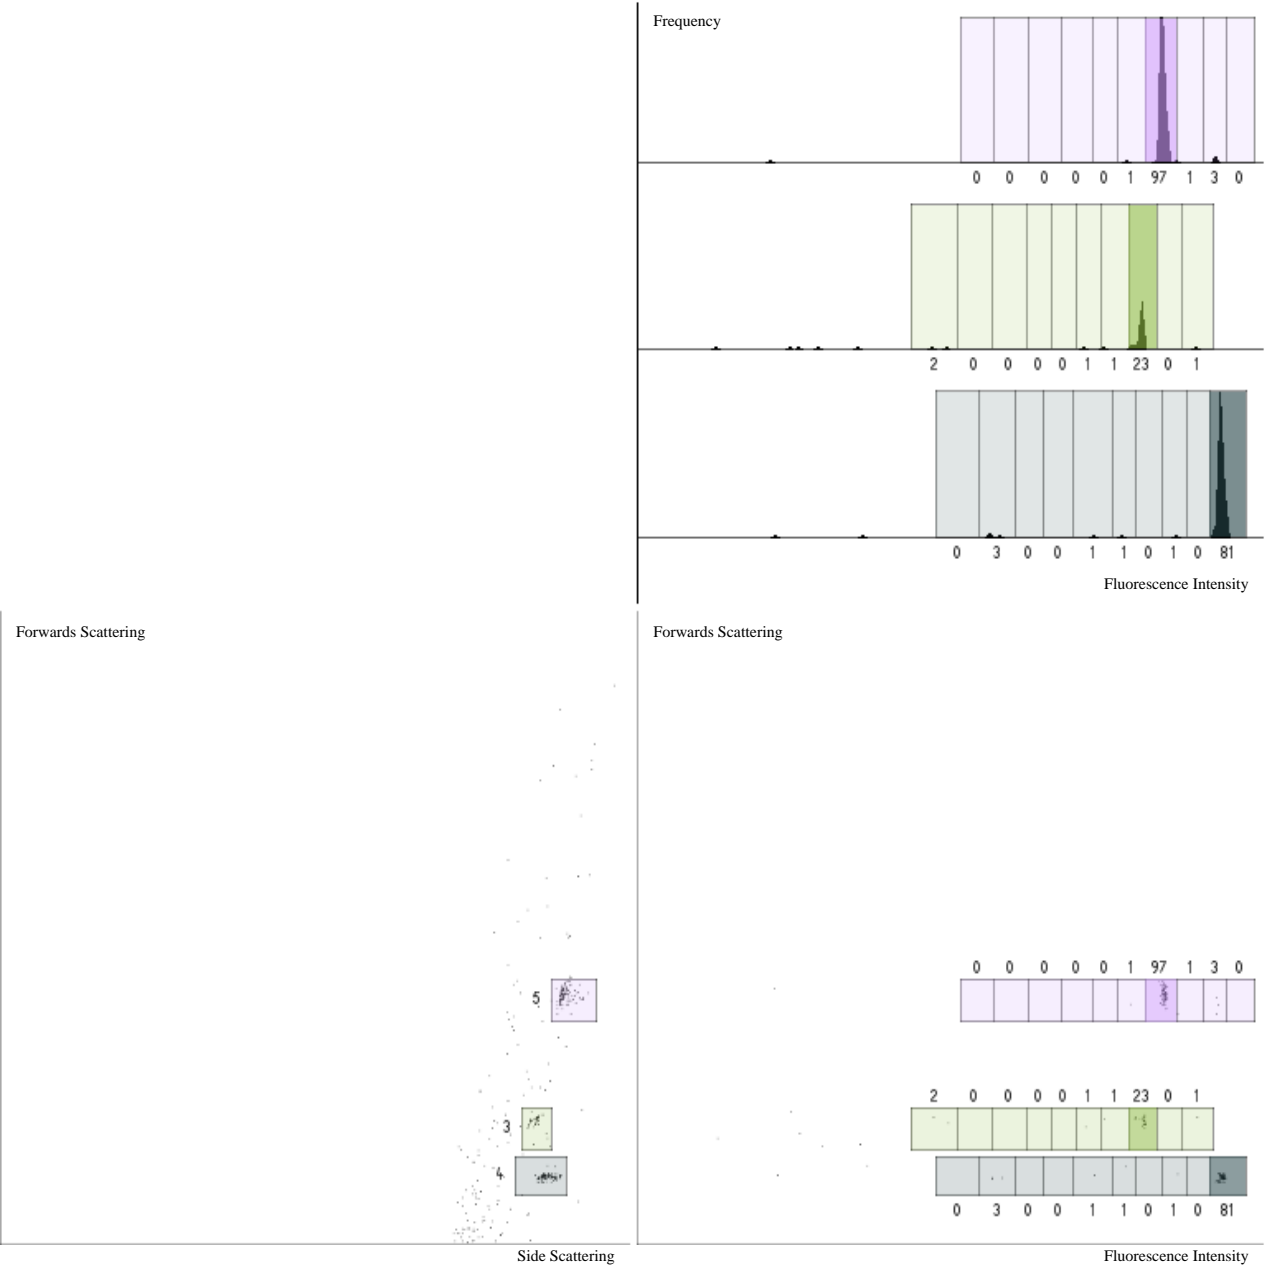

ANNEX 3: TAG DECONVOLUTION - BEAD 218

Passes flow sorting criteria: Yes  
Passes tag deconvolution criteria: Yes  
Included in protocol analysis: Yes  
Protocol: 7, 4, 8, 2  
Filename: Bin2\_plateA2\_C12.fcs  
Split 1: Petrol shading  
Split 2: Green shading  
Split 3: Violet shading

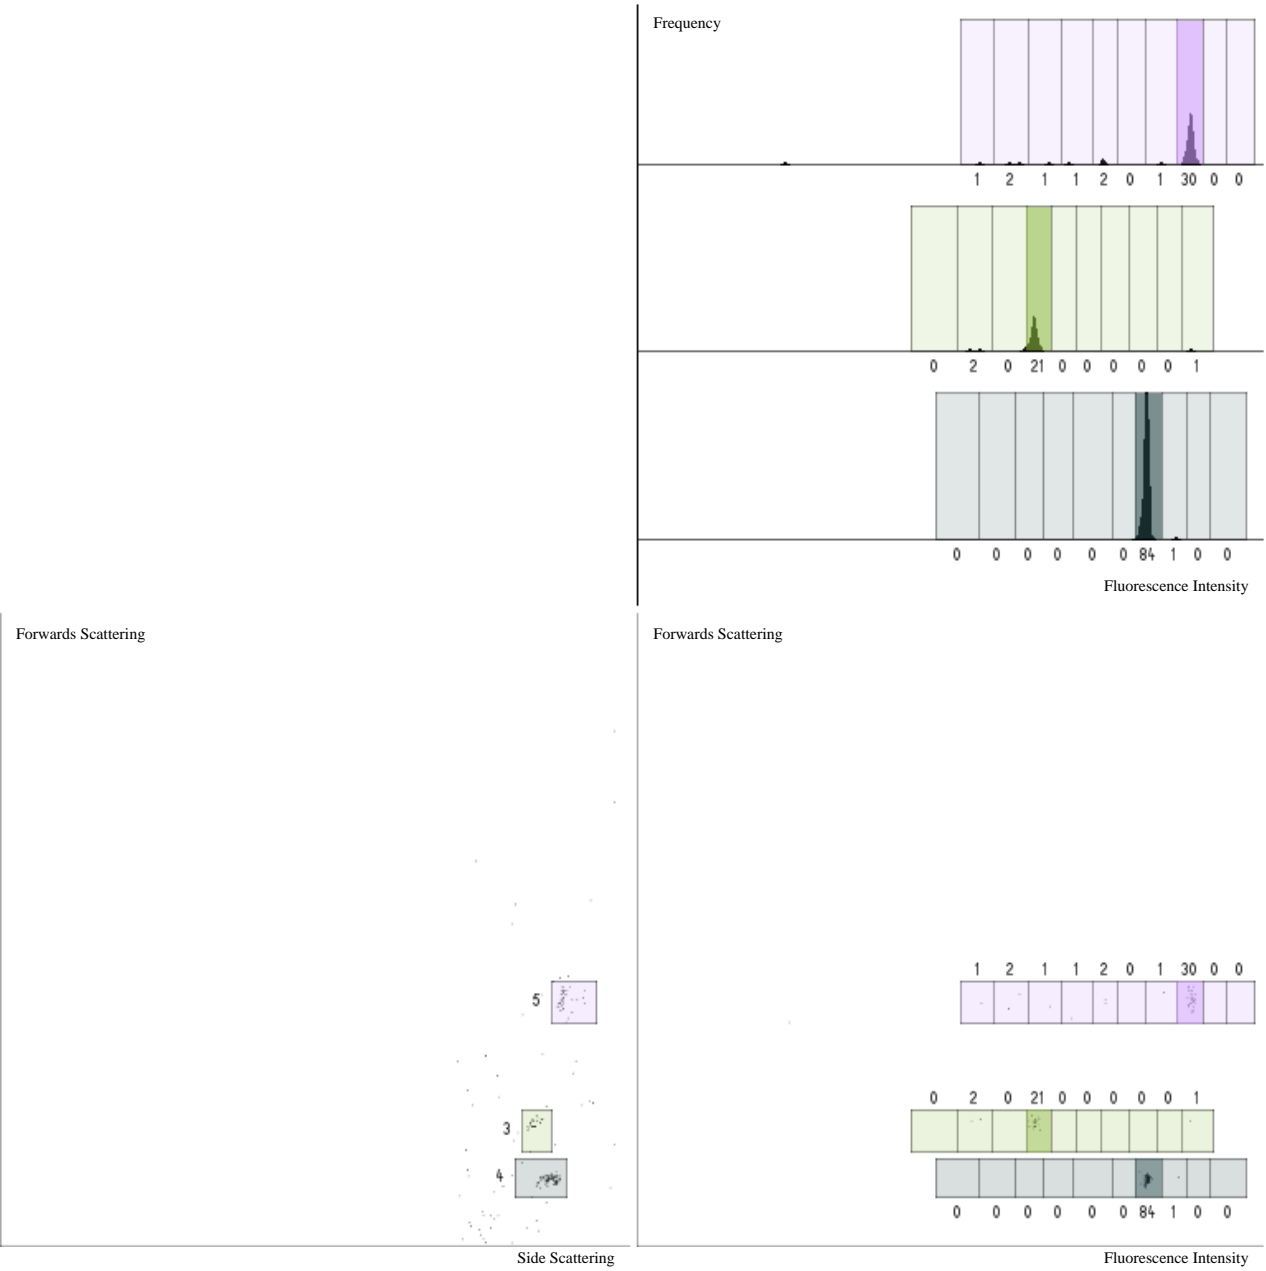

ANNEX 3: TAG DECONVOLUTION - BEAD 219

Passes flow sorting criteria: Yes  
Passes tag deconvolution criteria: Yes  
Included in protocol analysis: Yes  
Protocol: 9, 6, 6, 2  
Filename: Bin2\_plateA2\_D1.fcs  
Split 1: Petrol shading  
Split 2: Green shading  
Split 3: Violet shading

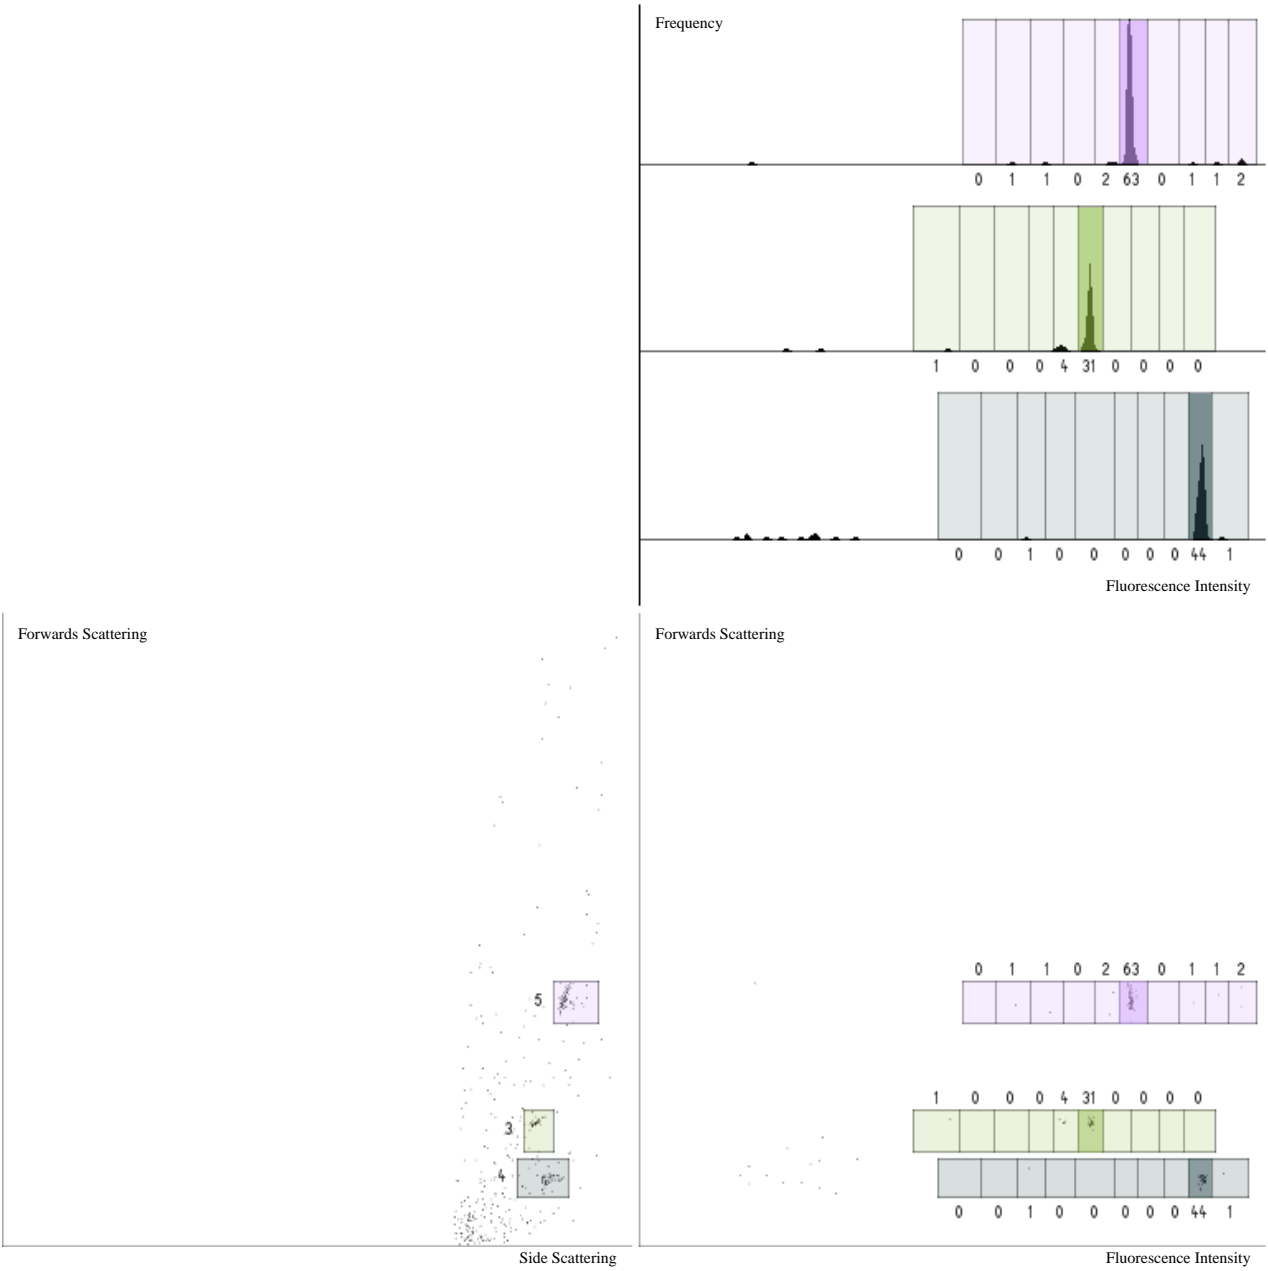

ANNEX 3: TAG DECONVOLUTION - BEAD 220

Passes flow sorting criteria: Yes  
Passes tag deconvolution criteria: Yes  
Included in protocol analysis: Yes  
Protocol: 10, 5, 5, 2  
Filename: Bin2\_plateA2\_D2.fcs  
Split 1: Petrol shading  
Split 2: Green shading  
Split 3: Violet shading

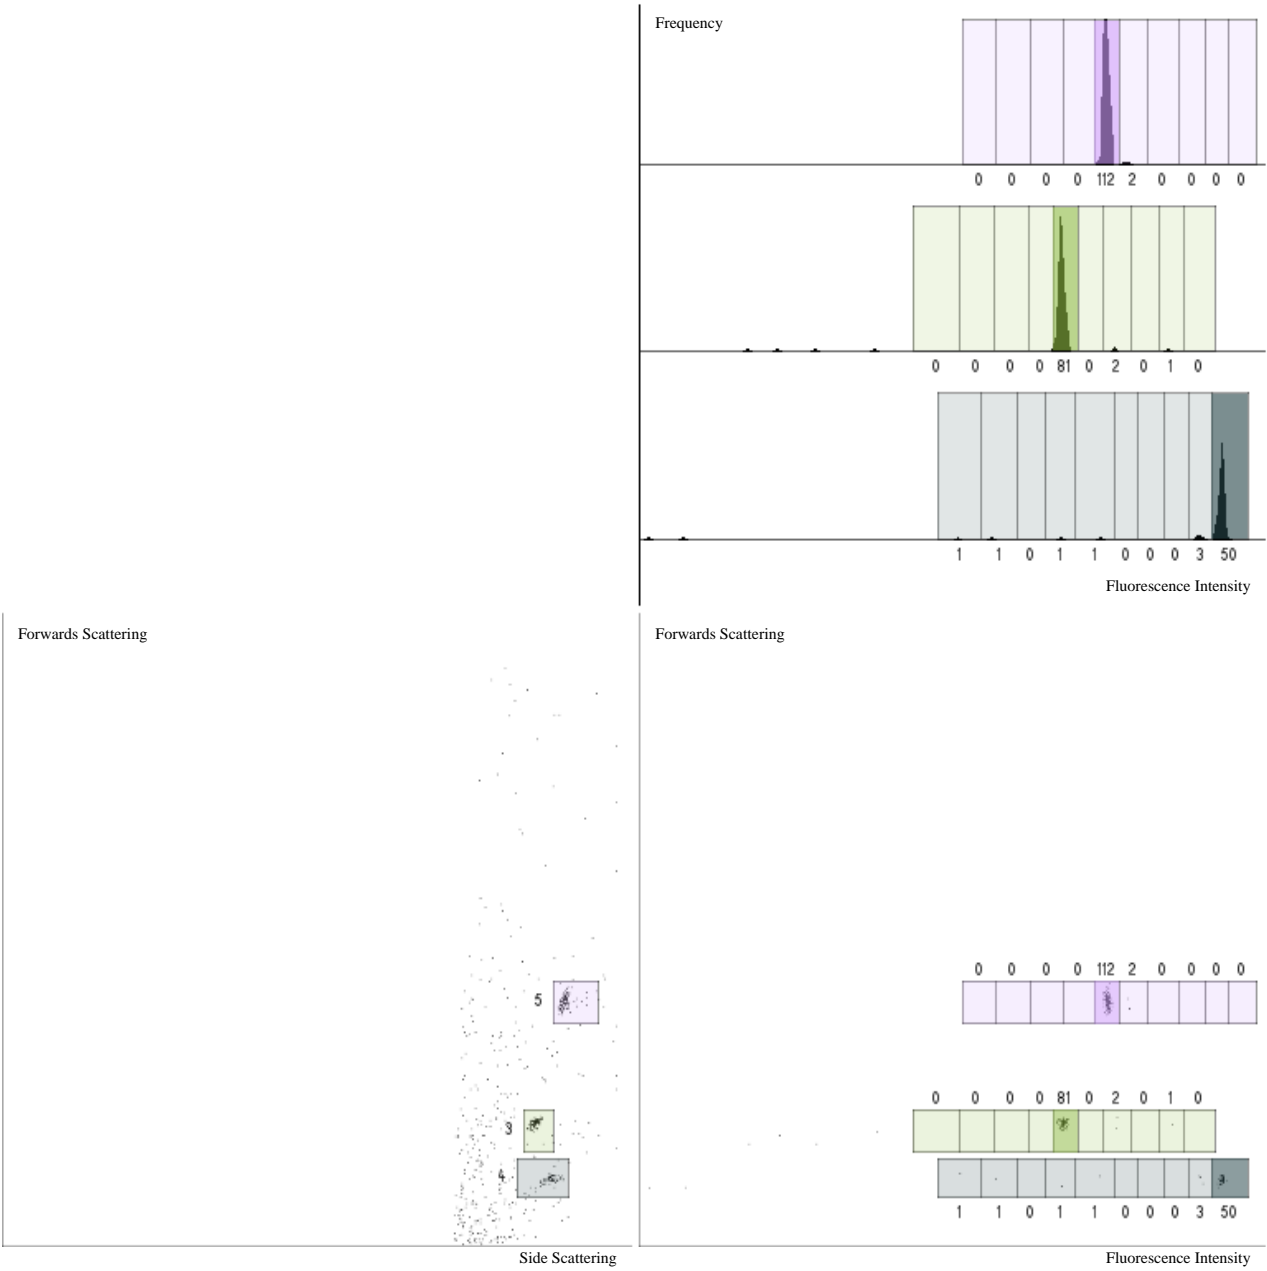

ANNEX 3: TAG DECONVOLUTION - BEAD 221

Passes flow sorting criteria: Yes  
Passes tag deconvolution criteria: Yes  
Included in protocol analysis: Yes  
Protocol: 6, 8, 2, 2  
Filename: Bin2\_plateA2\_D3.fcs  
Split 1: Petrol shading  
Split 2: Green shading  
Split 3: Violet shading

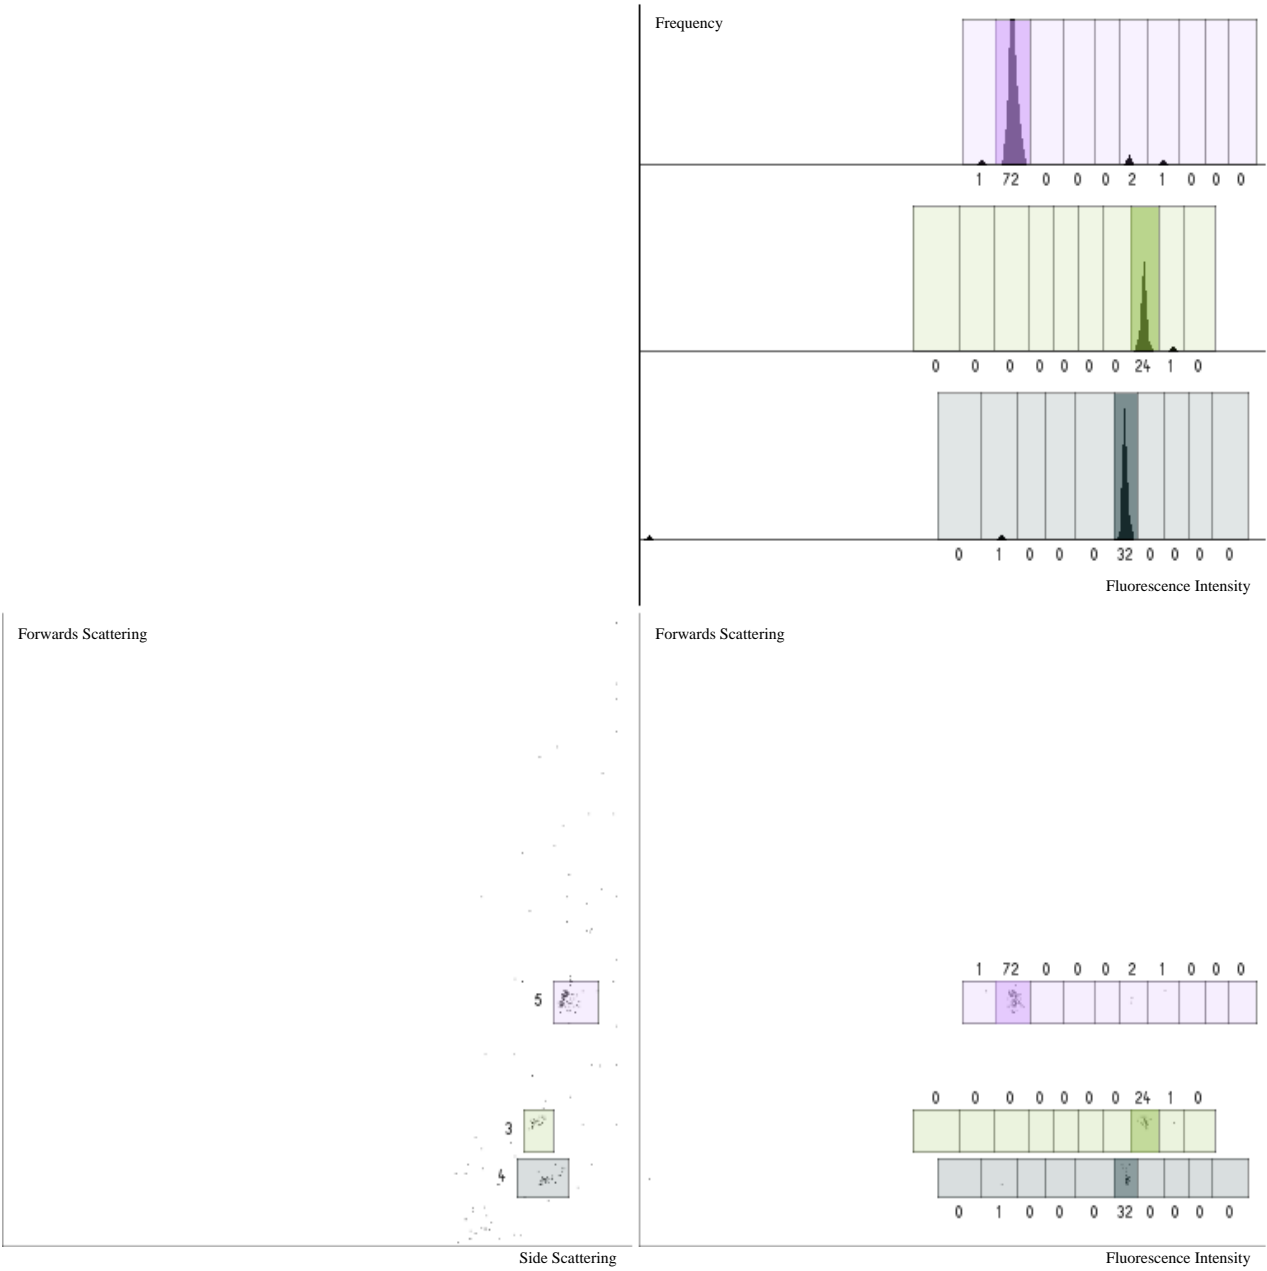

ANNEX 3: TAG DECONVOLUTION - BEAD 222

Passes flow sorting criteria: Yes  
Passes tag deconvolution criteria: Yes  
Included in protocol analysis: Yes  
Protocol: 7, 3, 6, 2  
Filename: Bin2\_plateA2\_D4.fcs  
Split 1: Petrol shading  
Split 2: Green shading  
Split 3: Violet shading

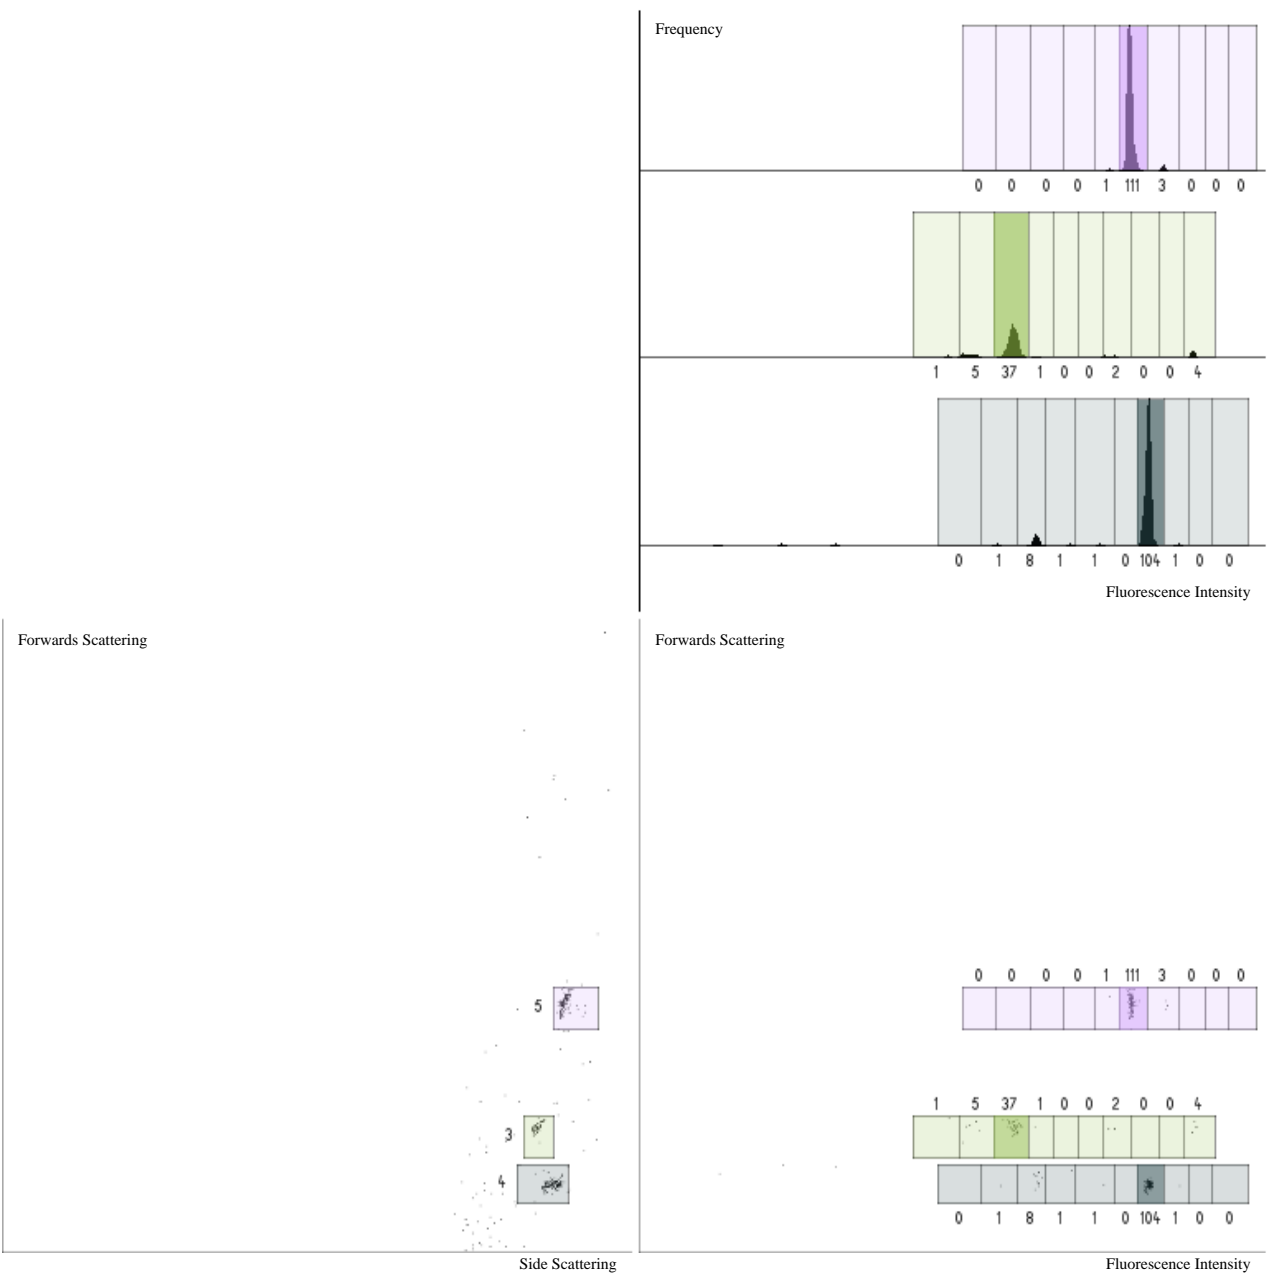



ANNEX 3: TAG DECONVOLUTION - BEAD 223

Passes flow sorting criteria: Yes  
Passes tag deconvolution criteria: Yes  
Included in protocol analysis: Yes  
Protocol: 5, 9, 5, 2  
Filename: Bin2\_plateA2\_D5.fcs  
Split 1: Petrol shading  
Split 2: Green shading  
Split 3: Violet shading

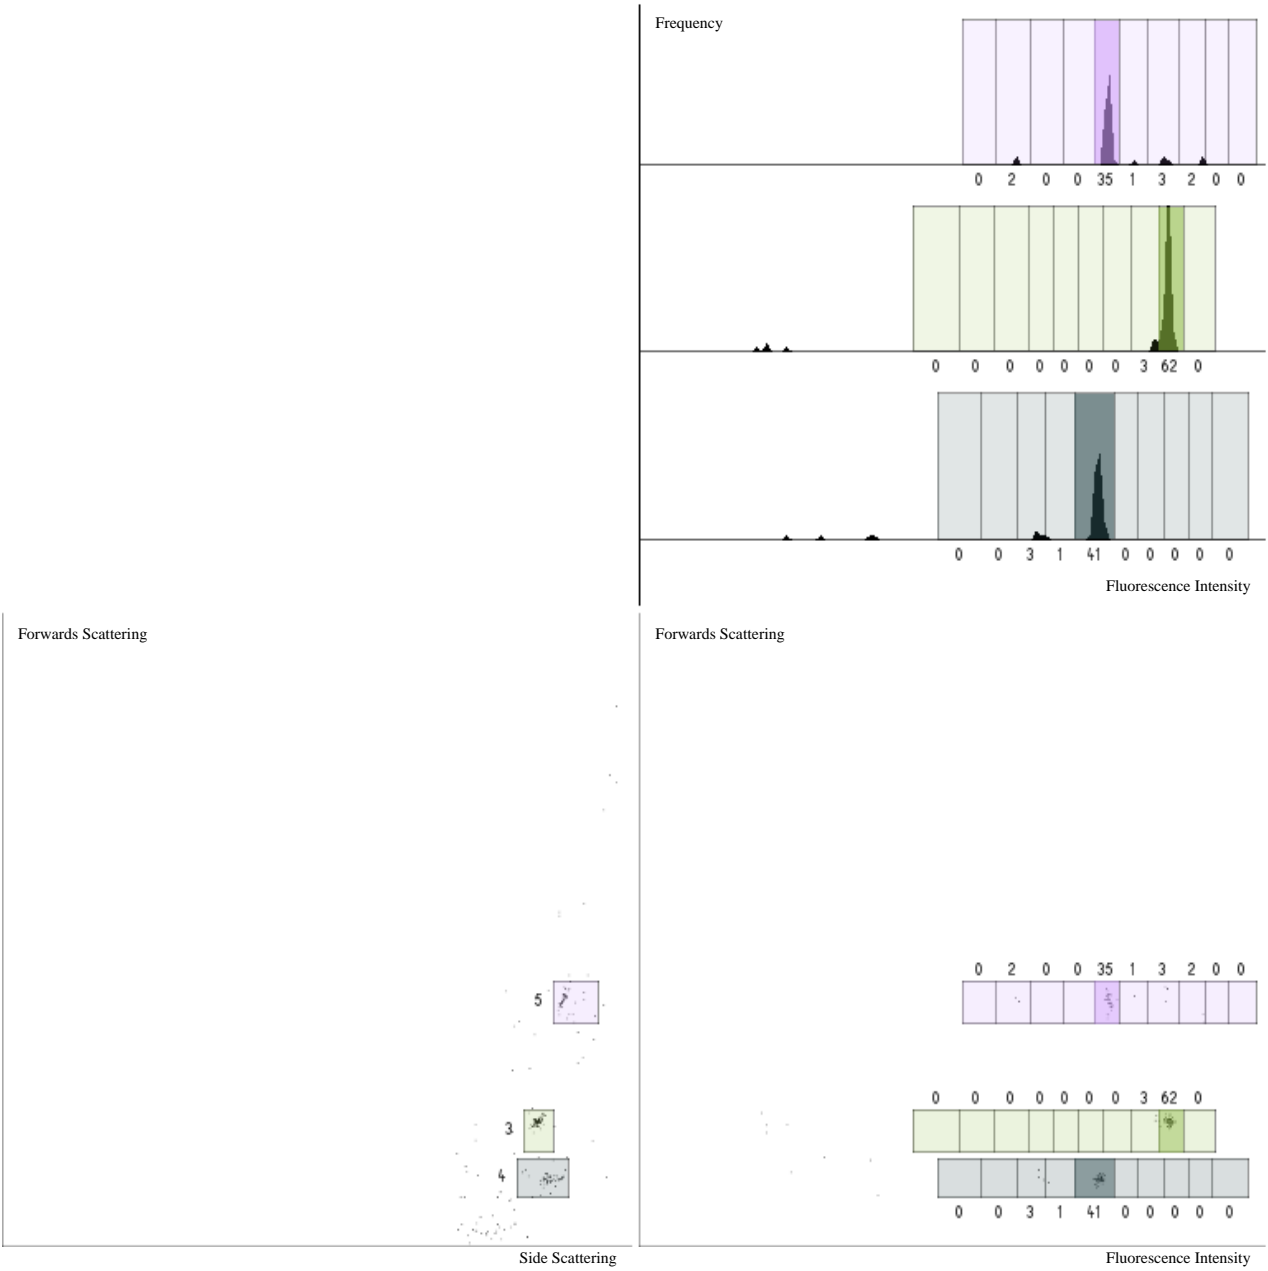

ANNEX 3: TAG DECONVOLUTION - BEAD 224

Passes flow sorting criteria: Yes  
Passes tag deconvolution criteria: Yes  
Included in protocol analysis: Yes  
Protocol: 8, 2, 2, 2  
Filename: Bin2\_plateA2\_D6.fcs  
Split 1: Petrol shading  
Split 2: Green shading  
Split 3: Violet shading

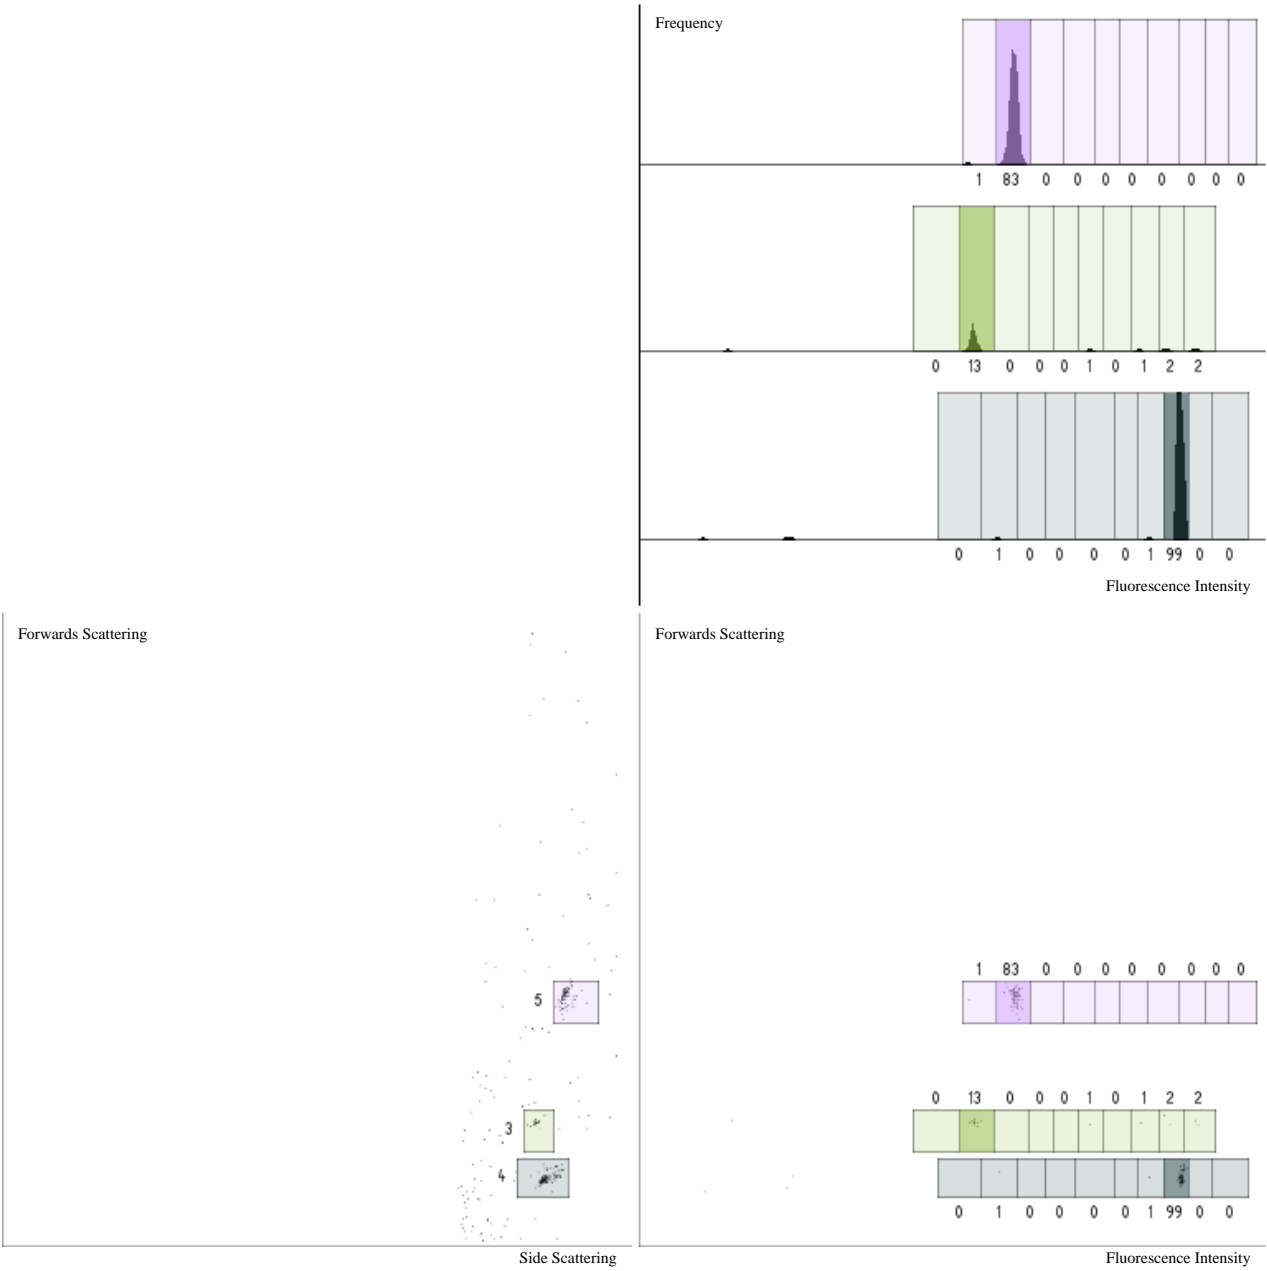

ANNEX 3: TAG DECONVOLUTION - BEAD 225

Passes flow sorting criteria: Yes  
Passes tag deconvolution criteria: No  
Included in protocol analysis: No  
Protocol: N/A  
Filename: Bin2\_plateA2\_D7.fcs  
Split 1: Petrol shading  
Split 2: Green shading  
Split 3: Violet shading

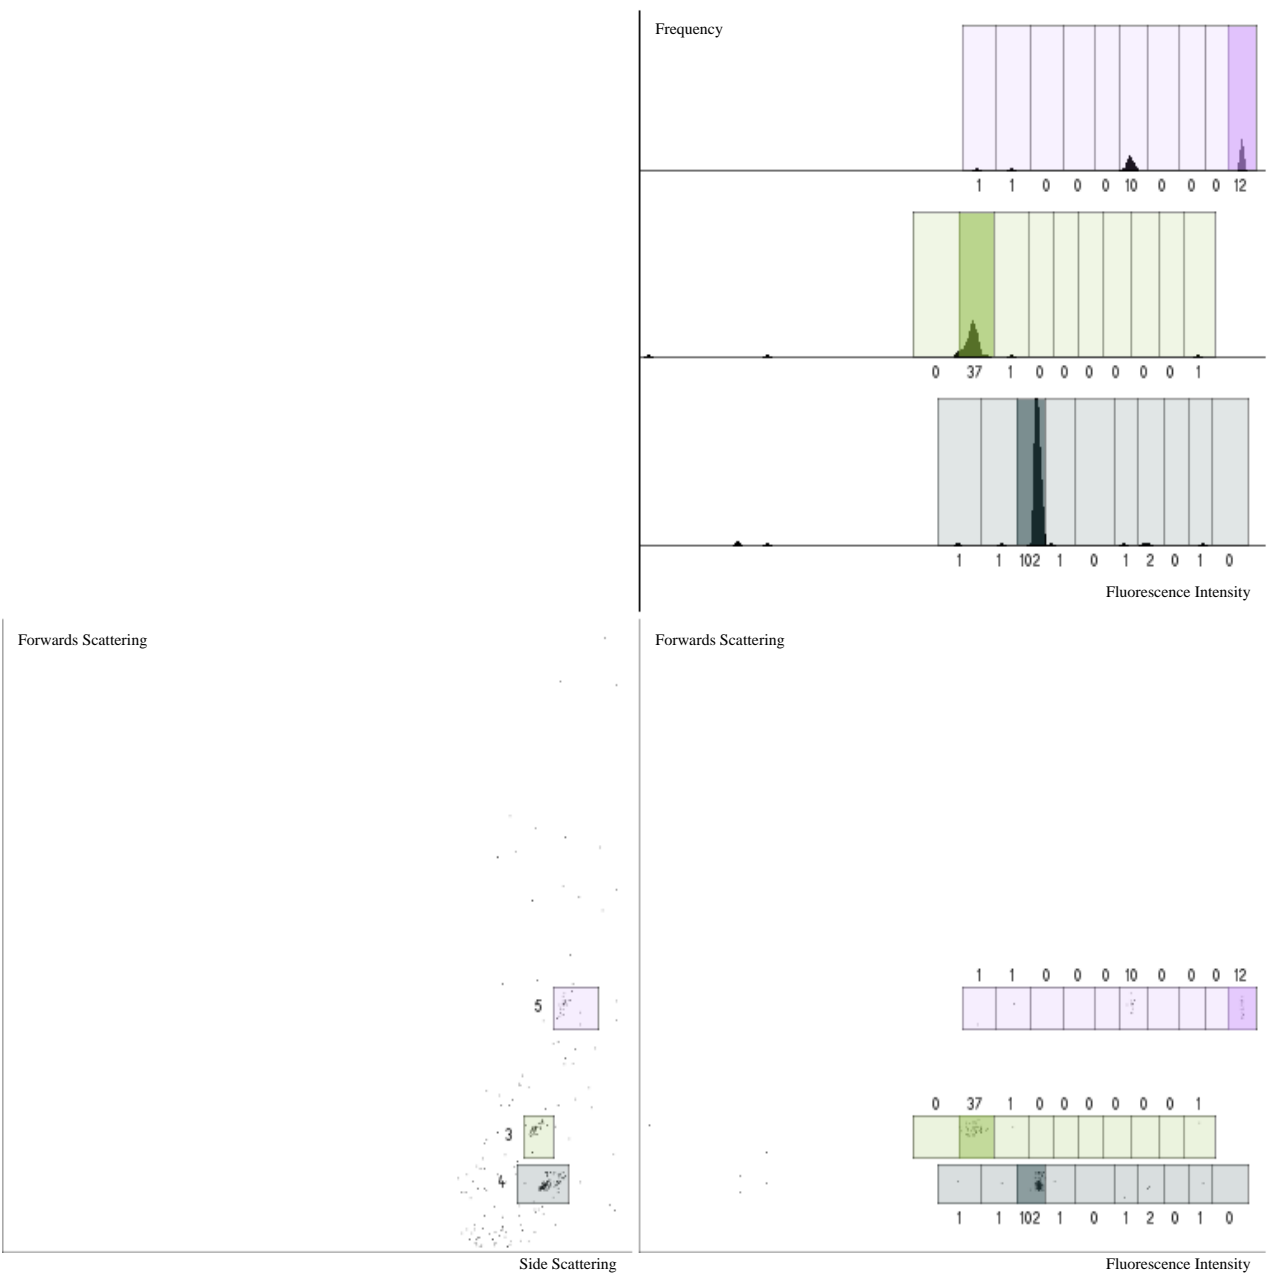

ANNEX 3: TAG DECONVOLUTION - BEAD 226

Passes flow sorting criteria: Yes  
Passes tag deconvolution criteria: No  
Included in protocol analysis: No  
Protocol: N/A  
Filename: Bin2\_plateA2\_D8.fcs  
Split 1: Petrol shading  
Split 2: Green shading  
Split 3: Violet shading

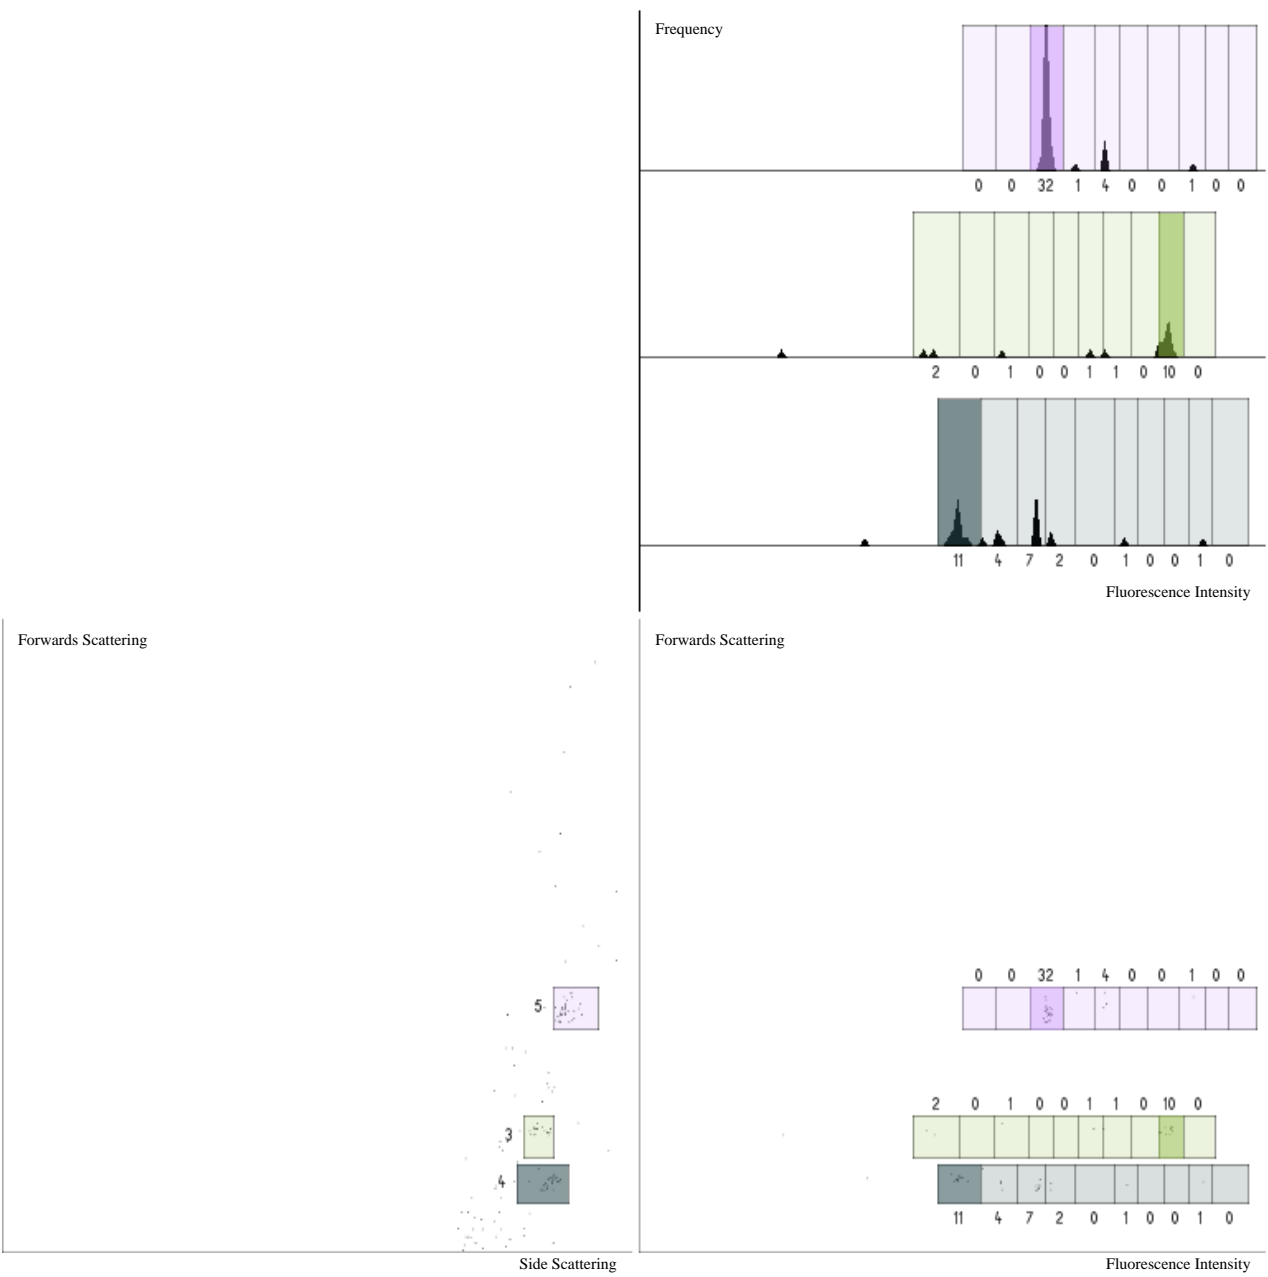

ANNEX 3: TAG DECONVOLUTION - BEAD 227

Passes flow sorting criteria: Yes  
Passes tag deconvolution criteria: Yes  
Included in protocol analysis: Yes  
Protocol: 1, 5, 6, 2  
Filename: Bin2\_plateA2\_D9.fcs  
Split 1: Petrol shading  
Split 2: Green shading  
Split 3: Violet shading

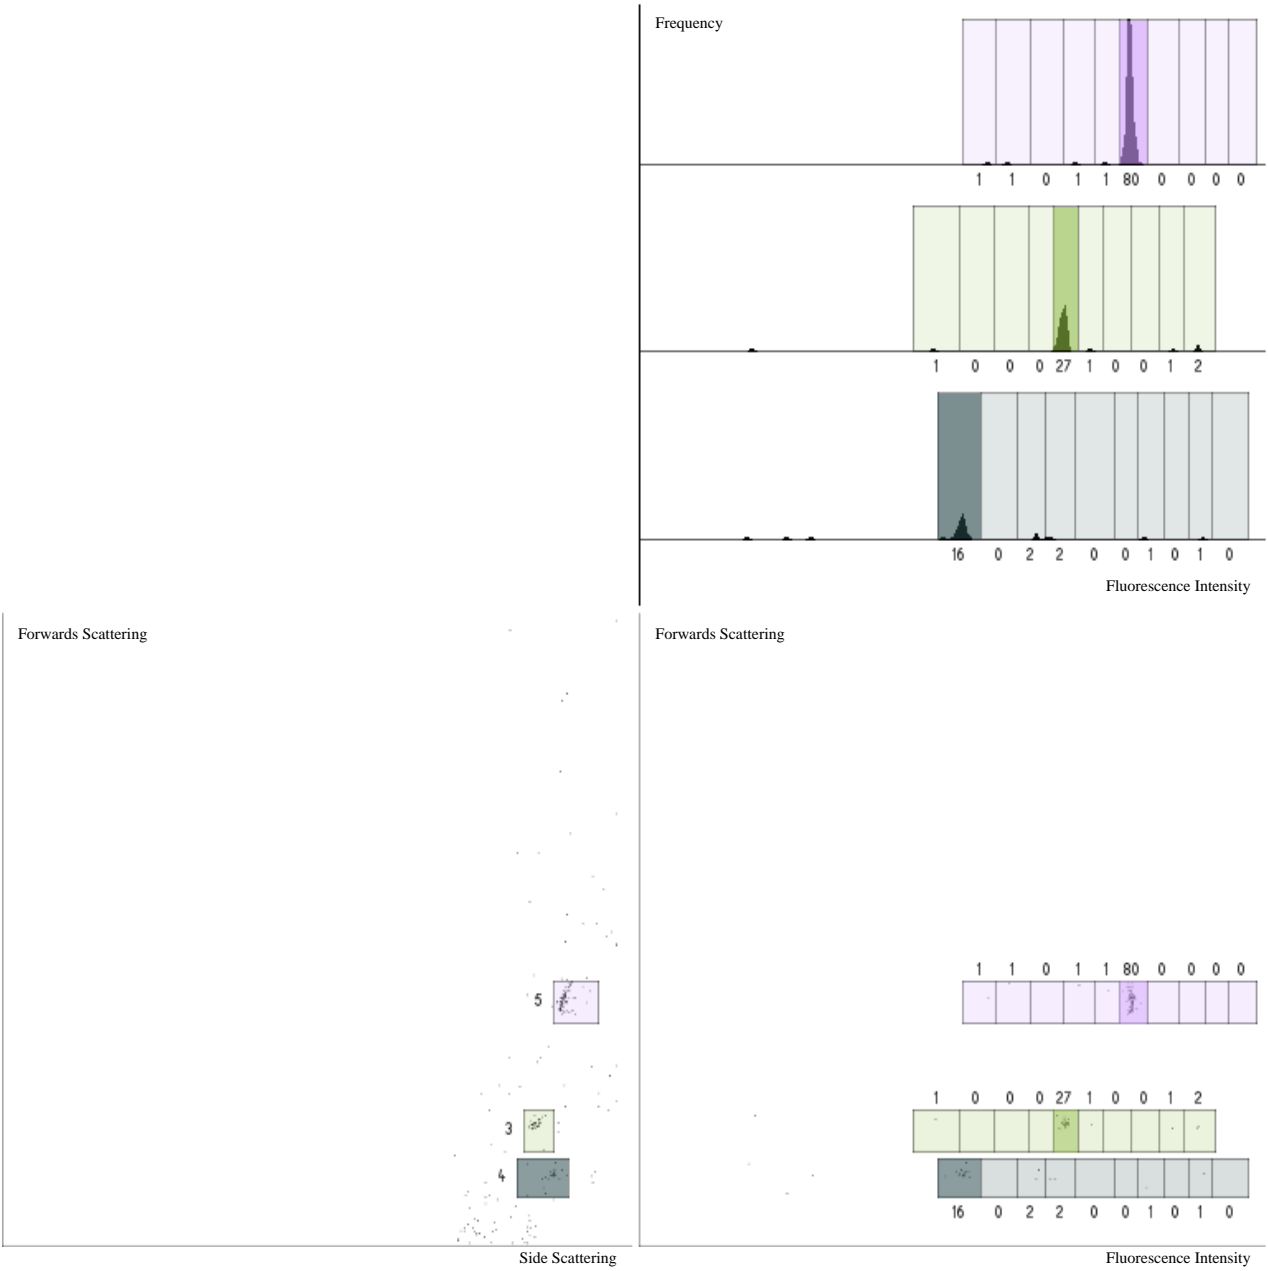

ANNEX 3: TAG DECONVOLUTION - BEAD 228

Passes flow sorting criteria: Yes  
Passes tag deconvolution criteria: Yes  
Included in protocol analysis: Yes  
Protocol: 5, 2, 2, 2  
Filename: Bin2\_plateA2\_D10.fcs  
Split 1: Petrol shading  
Split 2: Green shading  
Split 3: Violet shading

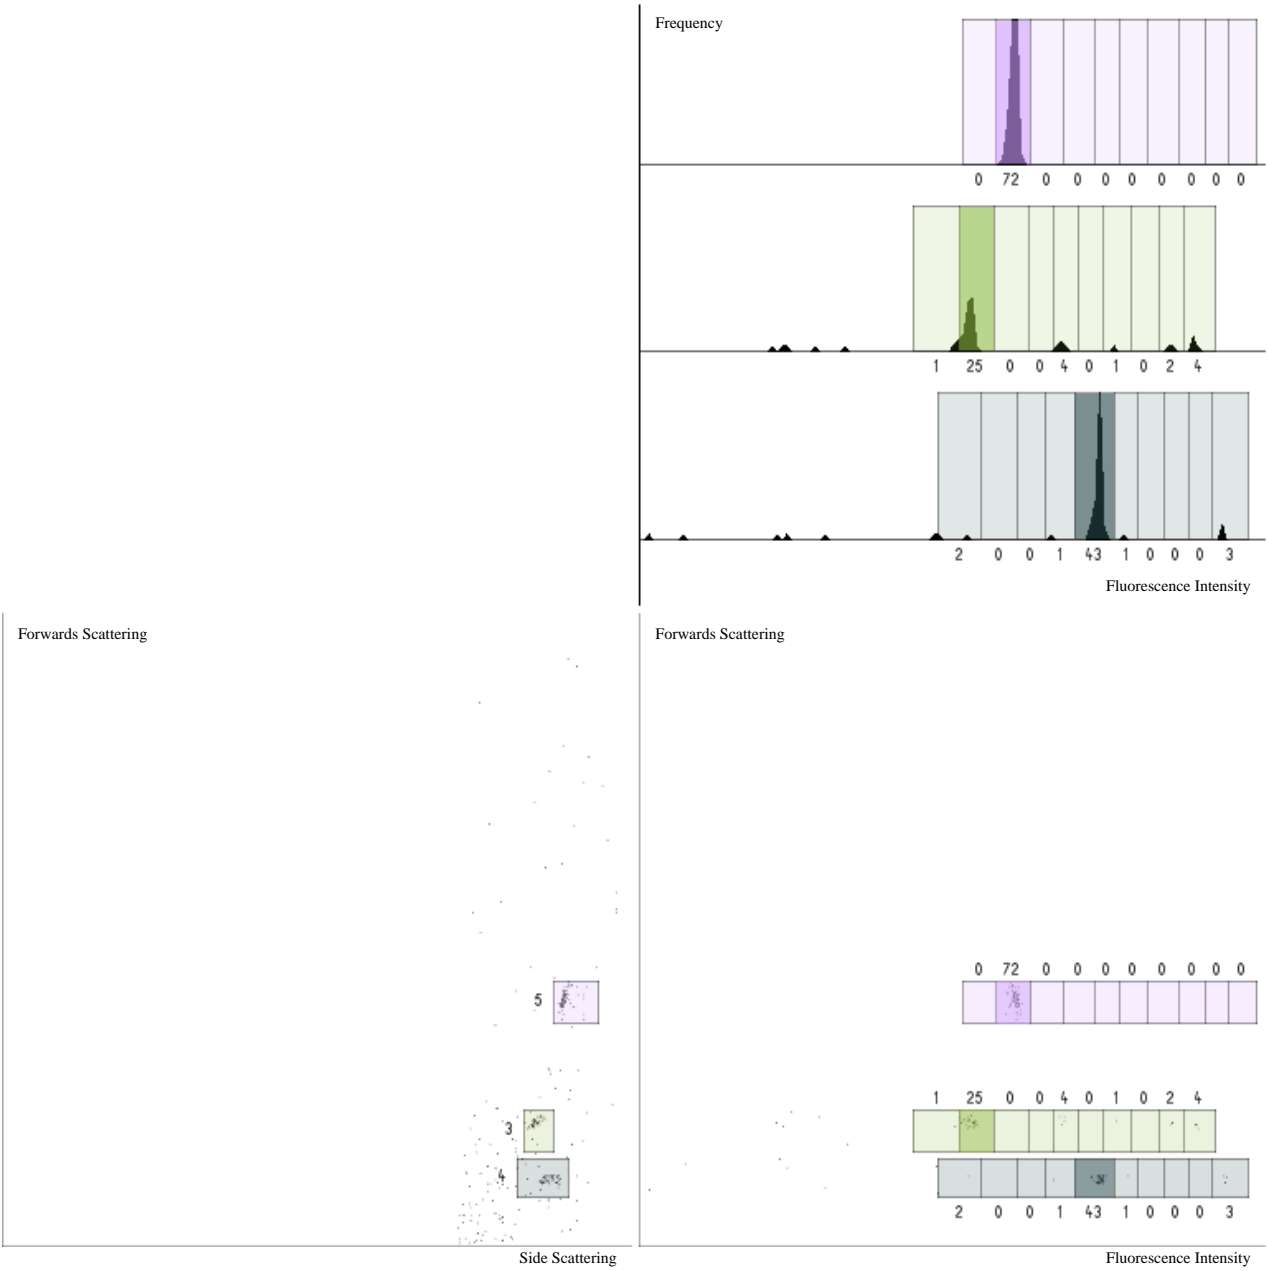

Passes flow sorting criteria: Yes  
 Passes tag deconvolution criteria: Yes  
 Included in protocol analysis: Yes  
 Protocol: 6, 5, 8, 2  
 Filename: Bin2\_plateA2\_D11.fcs  
 Split 1: Petrol shading  
 Split 2: Green shading  
 Split 3: Violet shading

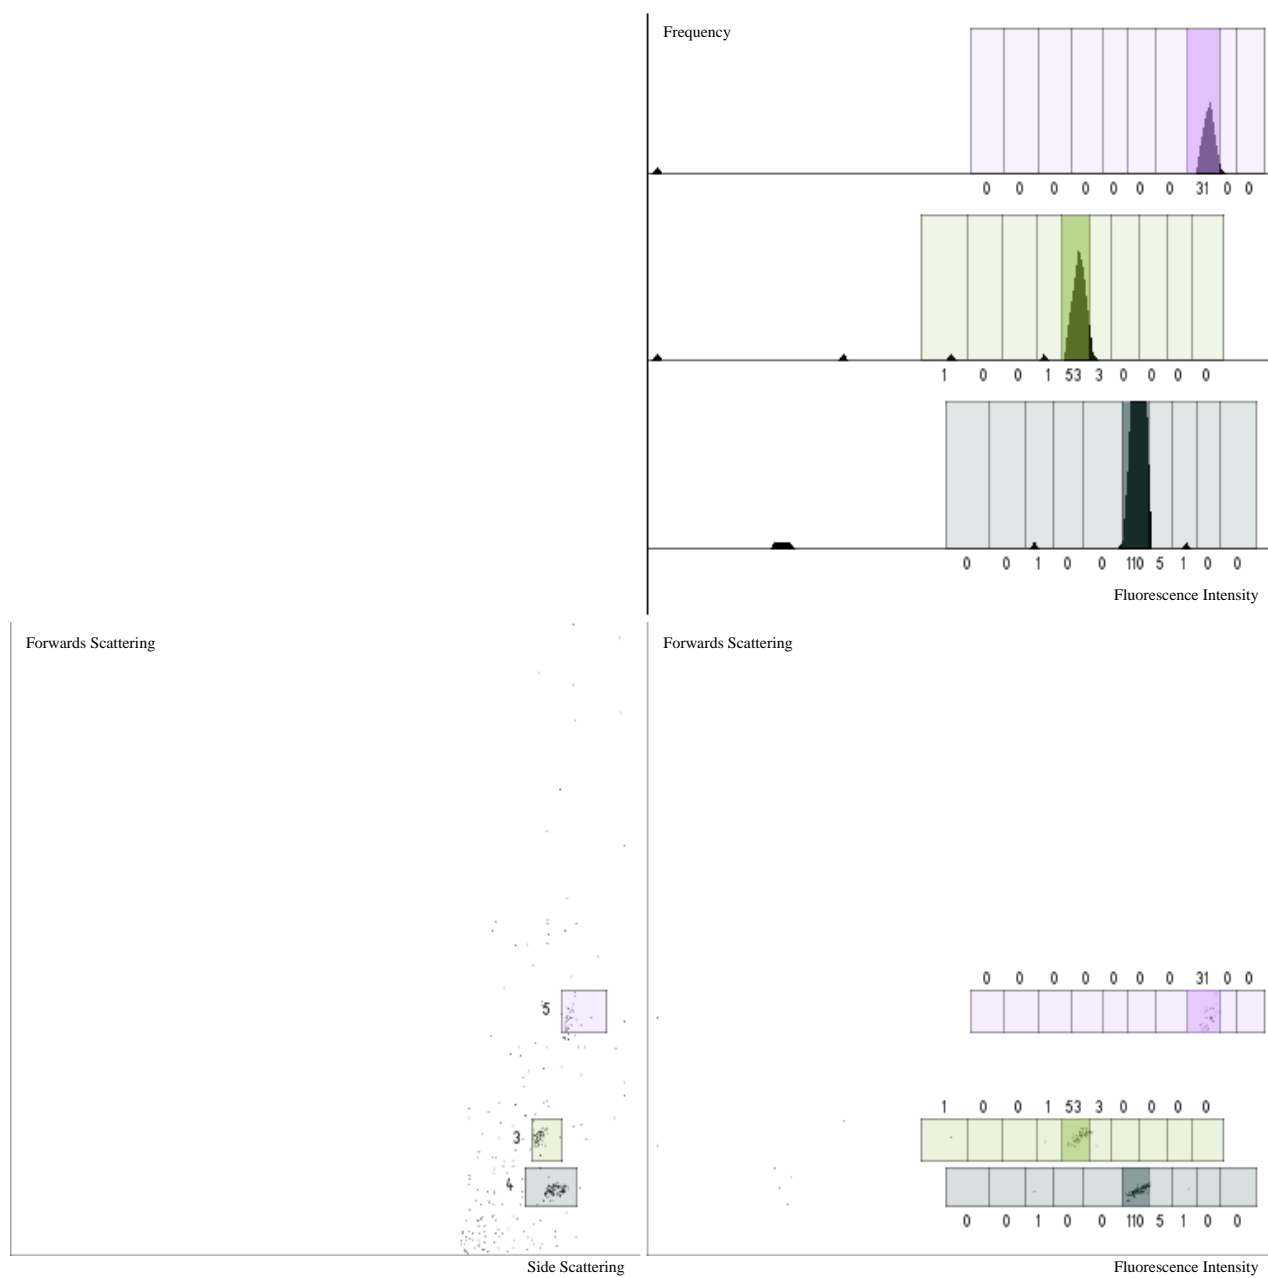

ANNEX 3: TAG DECONVOLUTION - BEAD 230

Passes flow sorting criteria: Yes  
Passes tag deconvolution criteria: No  
Included in protocol analysis: No  
Protocol: N/A  
Filename: Bin2\_plateA2\_D12.fcs  
Split 1: Petrol shading  
Split 2: Green shading  
Split 3: Violet shading

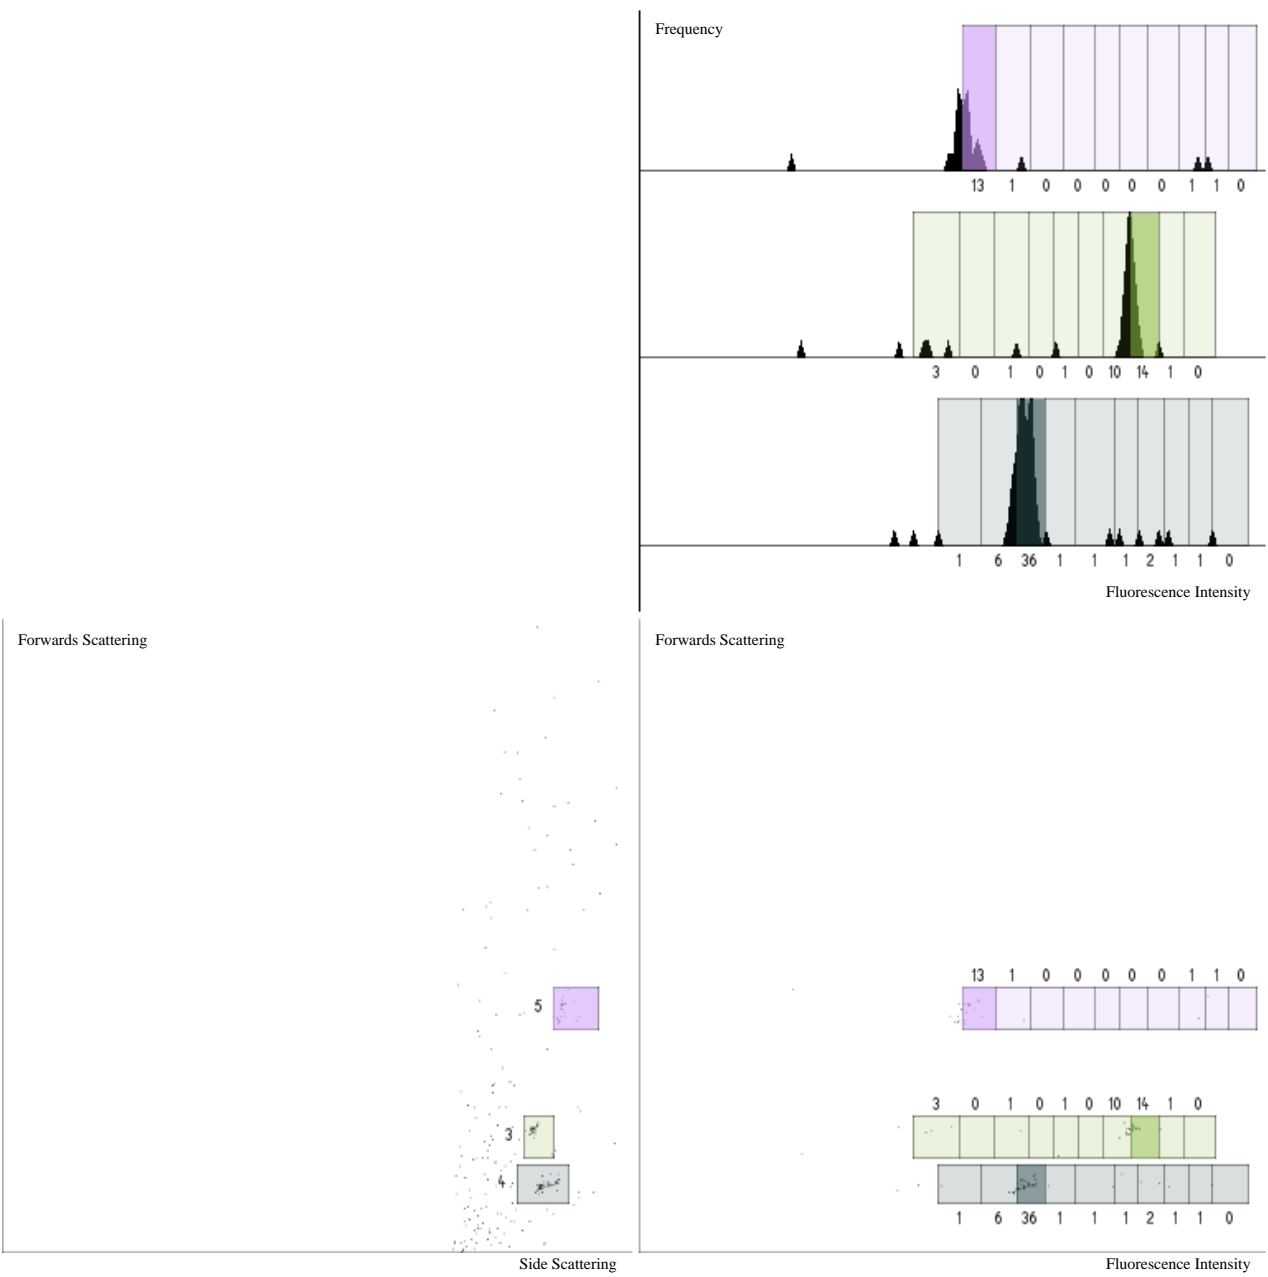



ANNEX 3: TAG DECONVOLUTION - BEAD 231

Passes flow sorting criteria: Yes  
Passes tag deconvolution criteria: No  
Included in protocol analysis: No  
Protocol: N/A  
Filename: Bin2\_plateA2\_E1.fcs  
Split 1: Petrol shading  
Split 2: Green shading  
Split 3: Violet shading

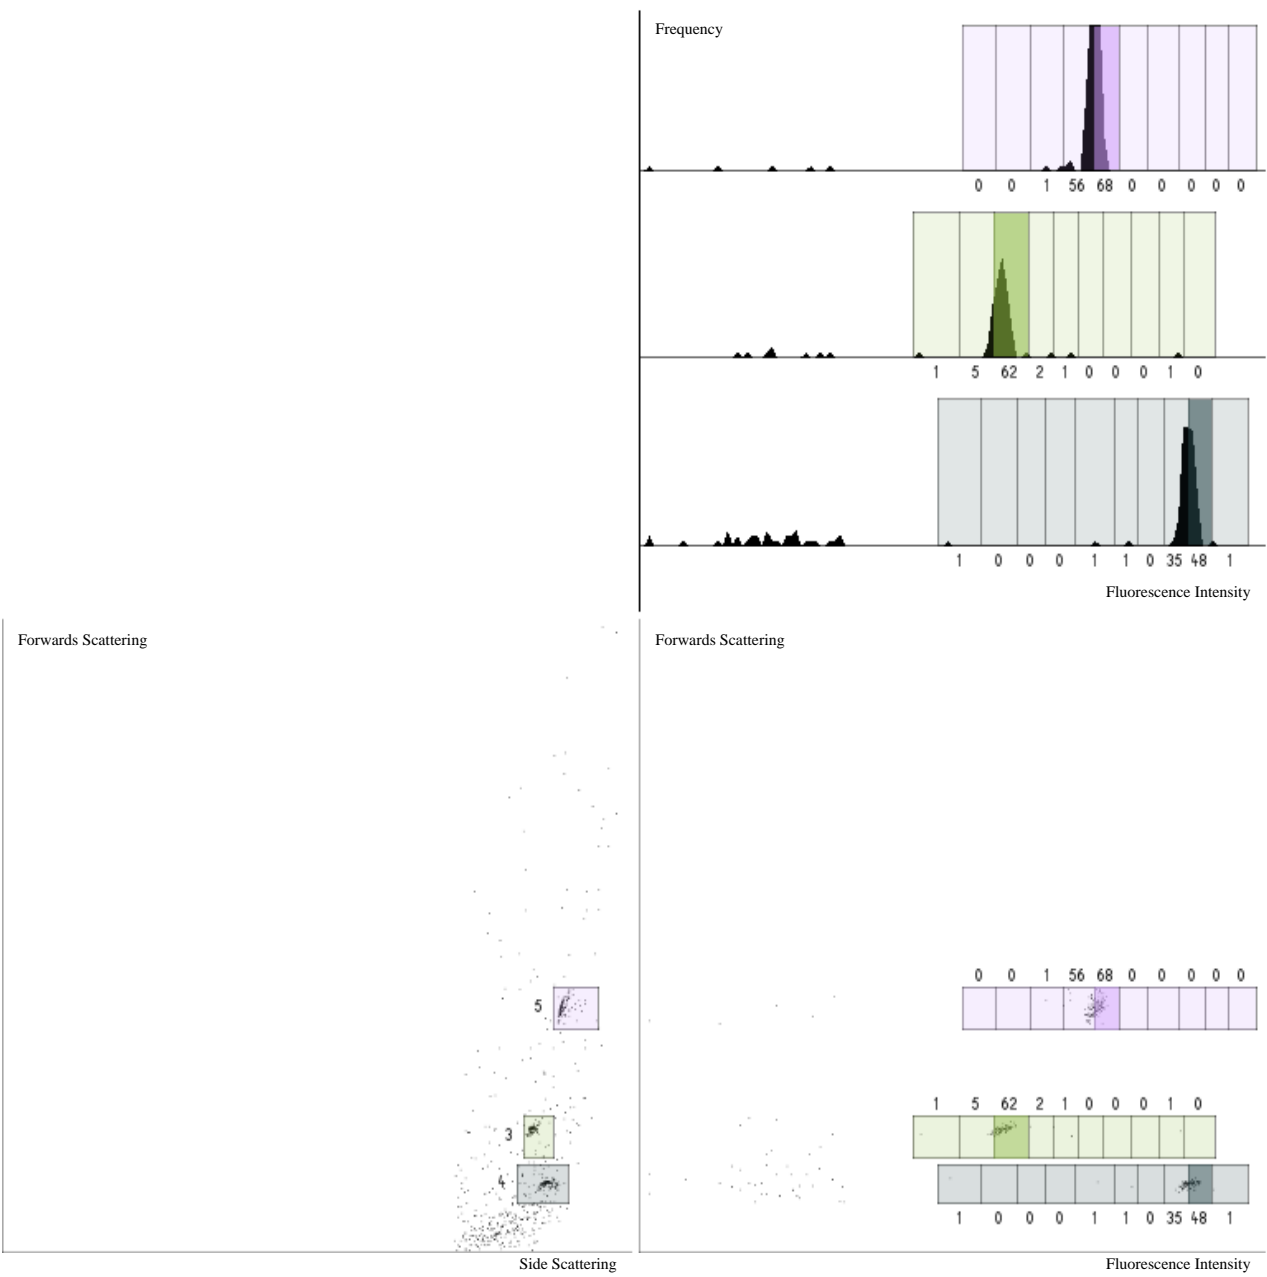

ANNEX 3: TAG DECONVOLUTION - BEAD 232

Passes flow sorting criteria: Yes  
Passes tag deconvolution criteria: No  
Included in protocol analysis: No  
Protocol: N/A  
Filename: Bin2\_plateA2\_E2.fcs  
Split 1: Petrol shading  
Split 2: Green shading  
Split 3: Violet shading

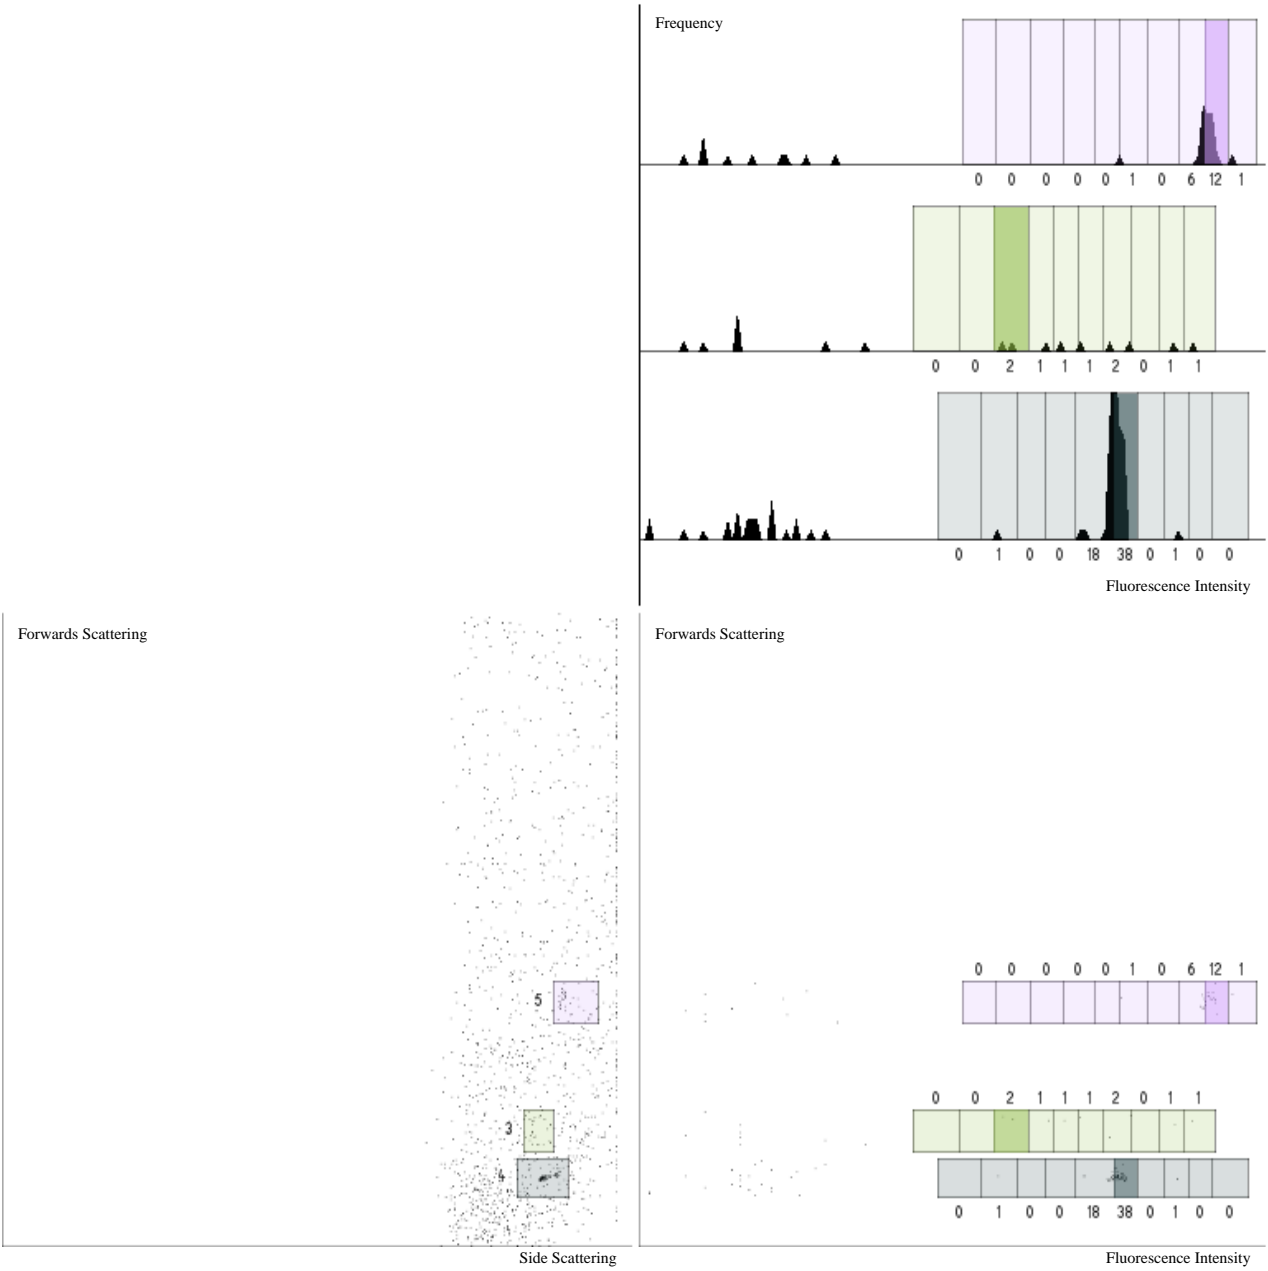

ANNEX 3: TAG DECONVOLUTION - BEAD 233

Passes flow sorting criteria: Yes  
Passes tag deconvolution criteria: No  
Included in protocol analysis: No  
Protocol: N/A  
Filename: Bin2\_plateA2\_E3.fcs  
Split 1: Petrol shading  
Split 2: Green shading  
Split 3: Violet shading

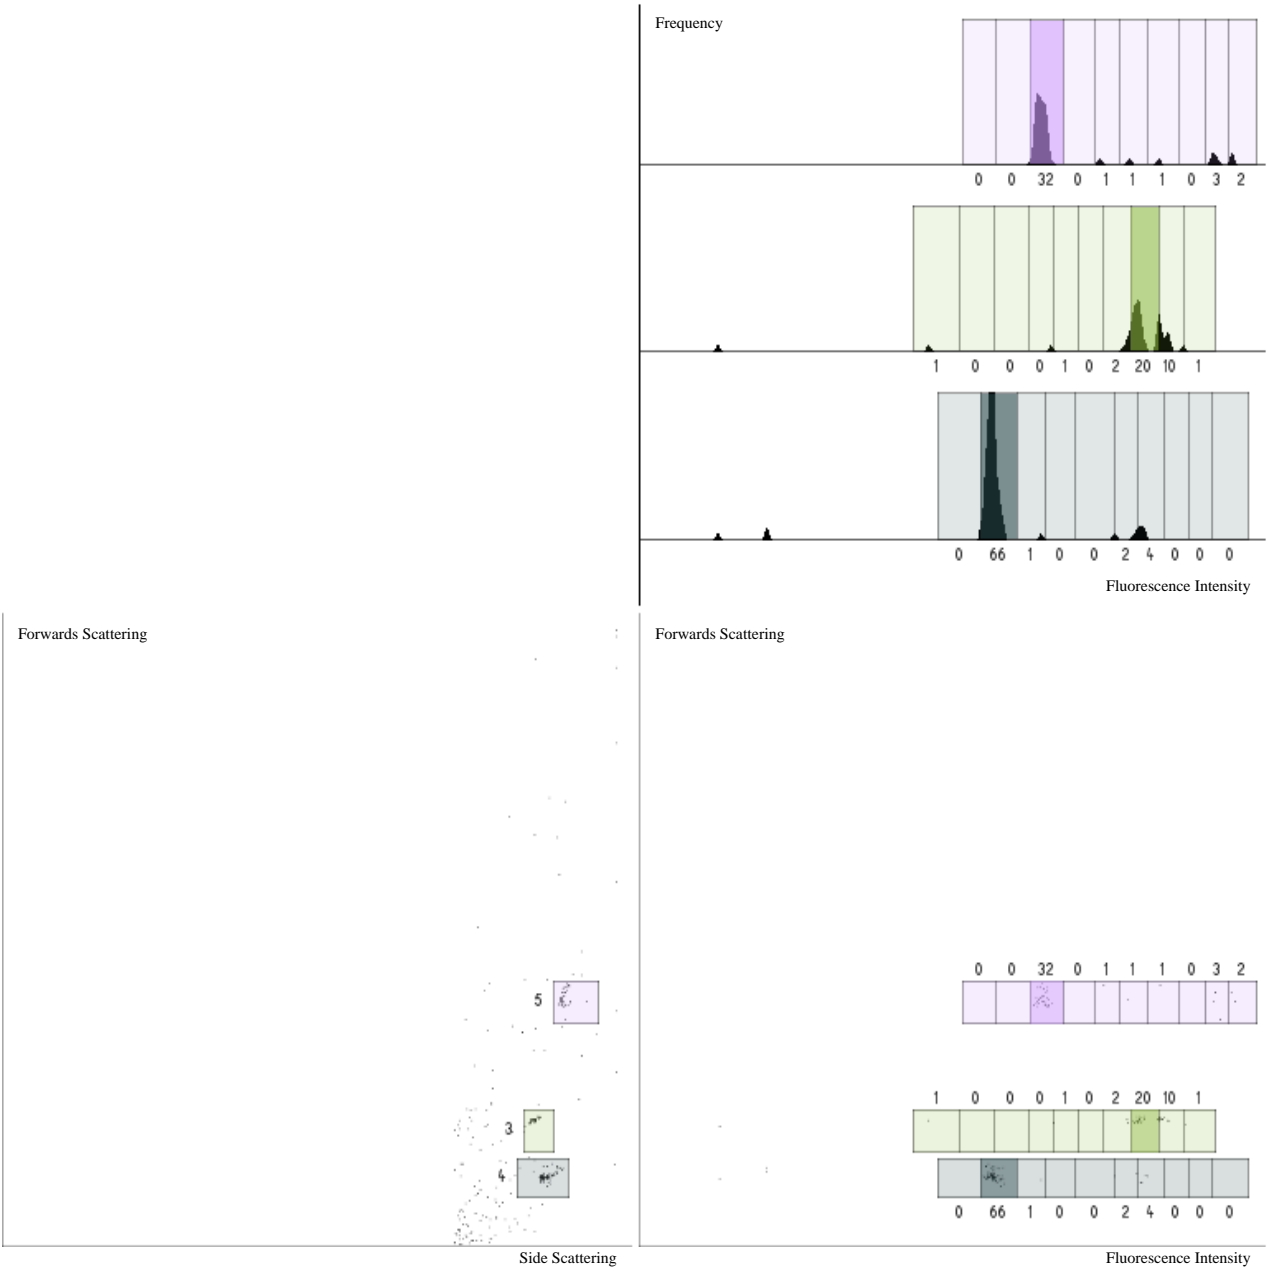

ANNEX 3: TAG DECONVOLUTION - BEAD 234

Passes flow sorting criteria: Yes  
Passes tag deconvolution criteria: Yes  
Included in protocol analysis: Yes  
Protocol: 6, 2, 9, 2  
Filename: Bin2\_plateA2\_E4.fcs  
Split 1: Petrol shading  
Split 2: Green shading  
Split 3: Violet shading

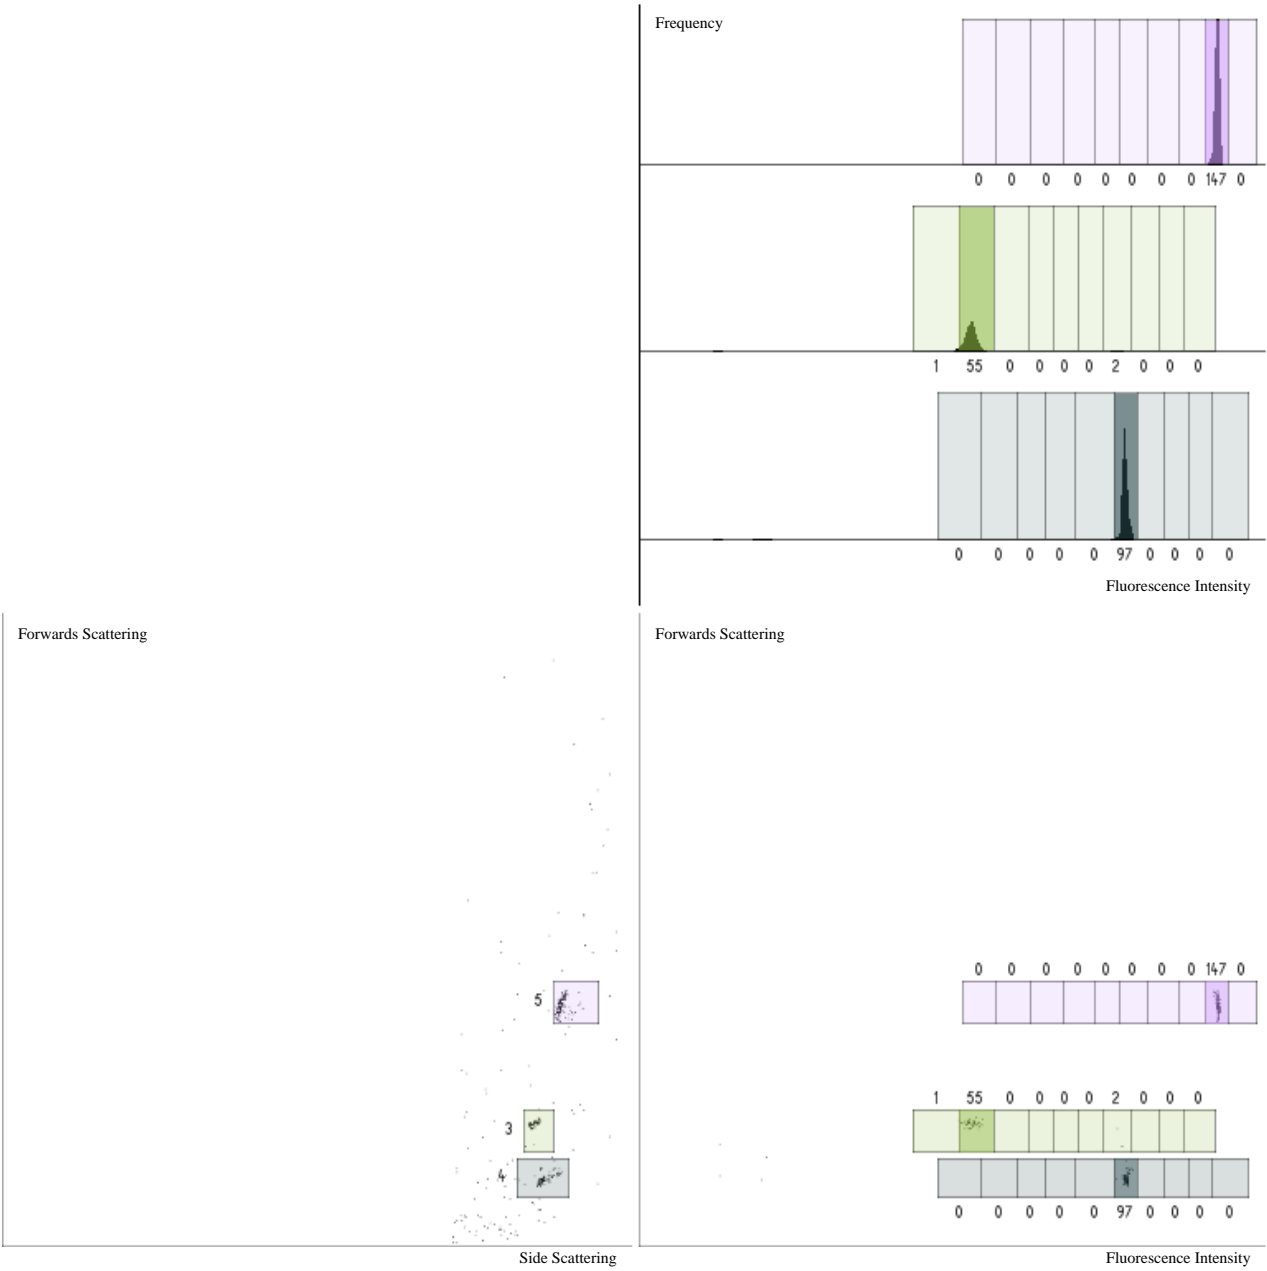

ANNEX 3: TAG DECONVOLUTION - BEAD 235

Passes flow sorting criteria: Yes  
Passes tag deconvolution criteria: Yes  
Included in protocol analysis: Yes  
Protocol: 1, 6, 5, 2  
Filename: Bin2\_plateA2\_E5.fcs  
Split 1: Petrol shading  
Split 2: Green shading  
Split 3: Violet shading

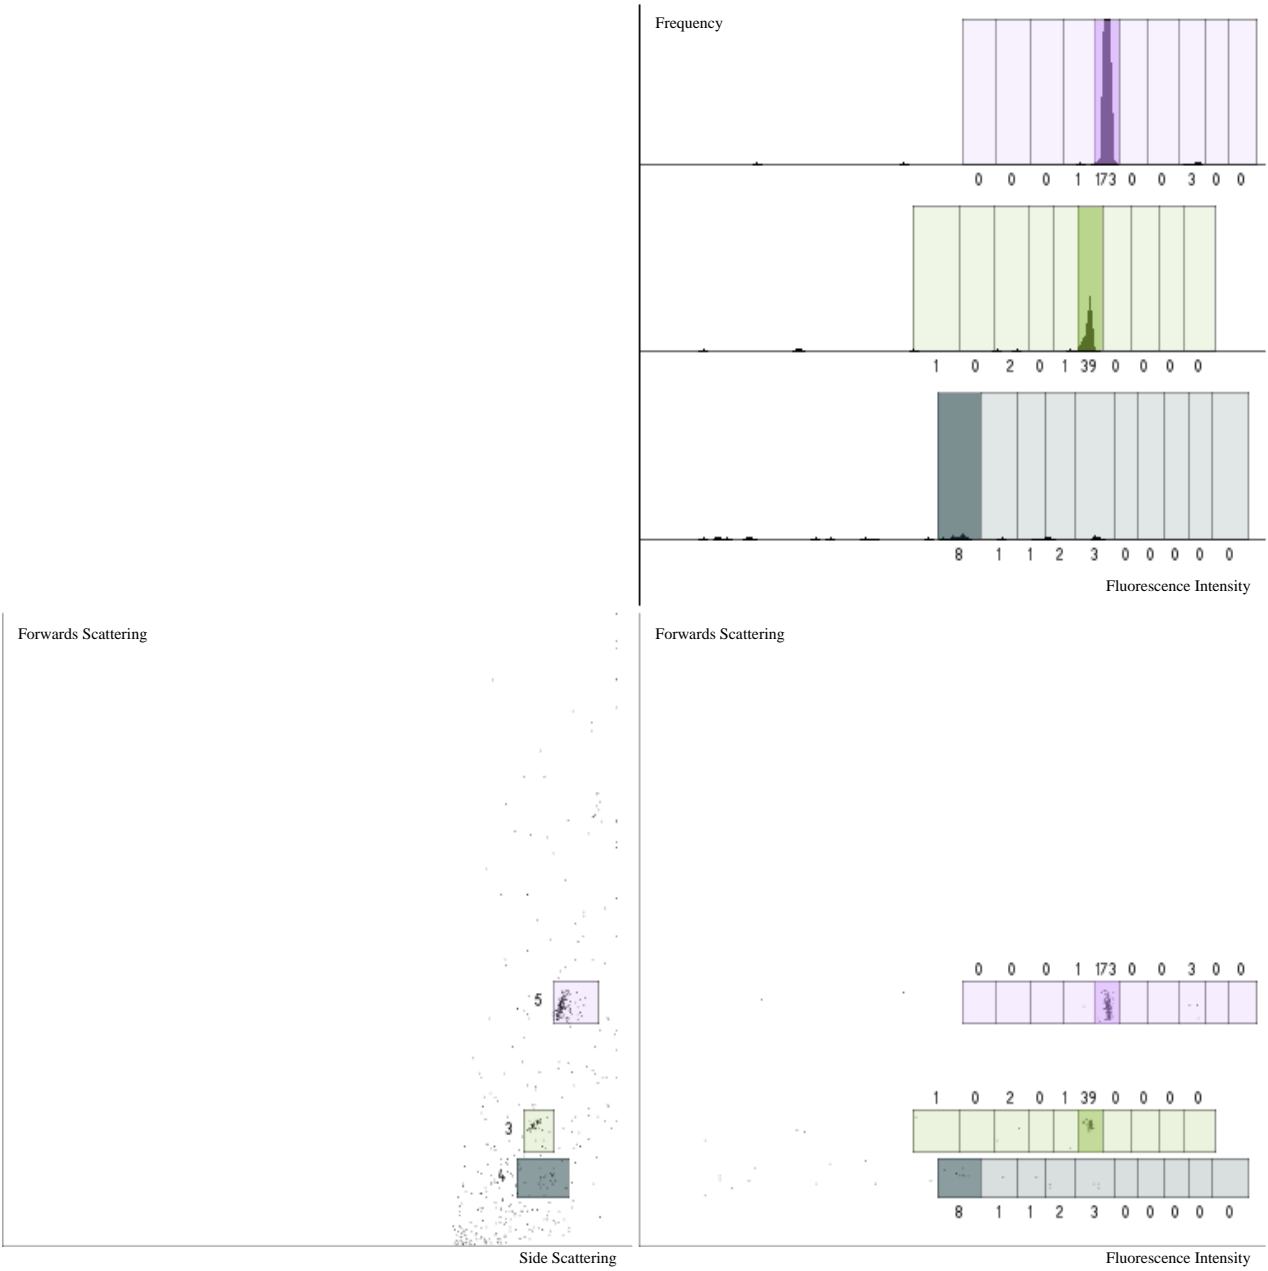

ANNEX 3: TAG DECONVOLUTION - BEAD 236

Passes flow sorting criteria: Yes  
Passes tag deconvolution criteria: Yes  
Included in protocol analysis: Yes  
Protocol: 8, 3, 2, 2  
Filename: Bin2\_plateA2\_E6.fcs  
Split 1: Petrol shading  
Split 2: Green shading  
Split 3: Violet shading

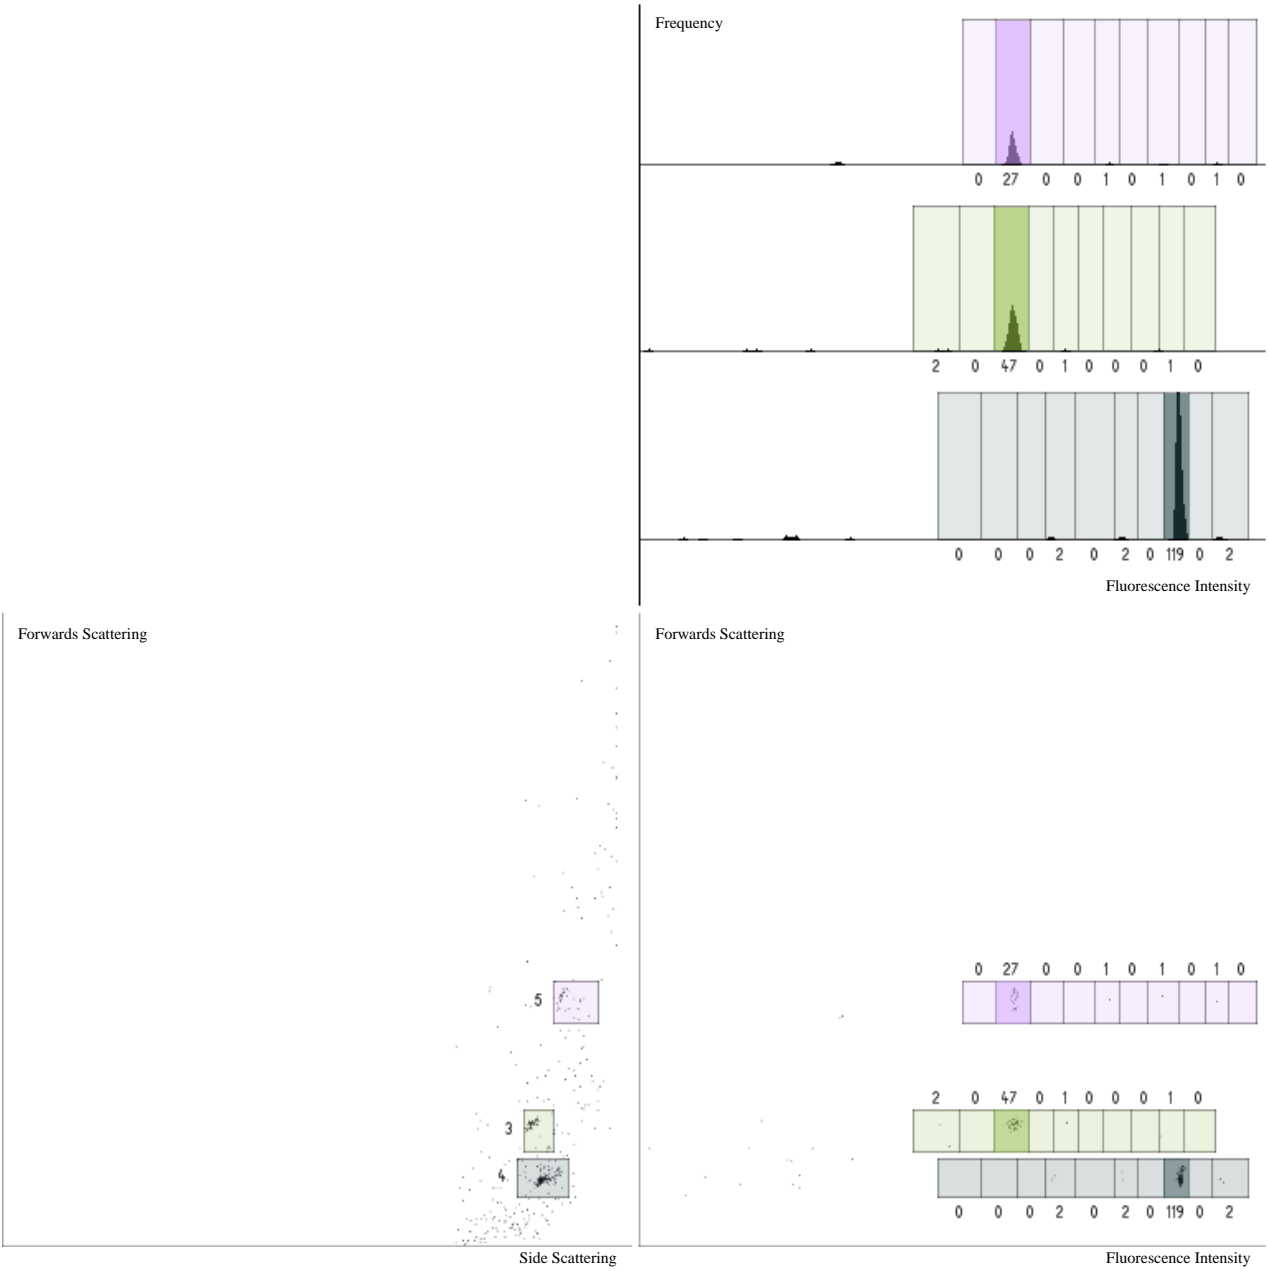

ANNEX 3: TAG DECONVOLUTION - BEAD 237

Passes flow sorting criteria: Yes  
Passes tag deconvolution criteria: Yes  
Included in protocol analysis: Yes  
Protocol: 3, 5, 8, 2  
Filename: Bin2\_plateA2\_E7.fcs  
Split 1: Petrol shading  
Split 2: Green shading  
Split 3: Violet shading

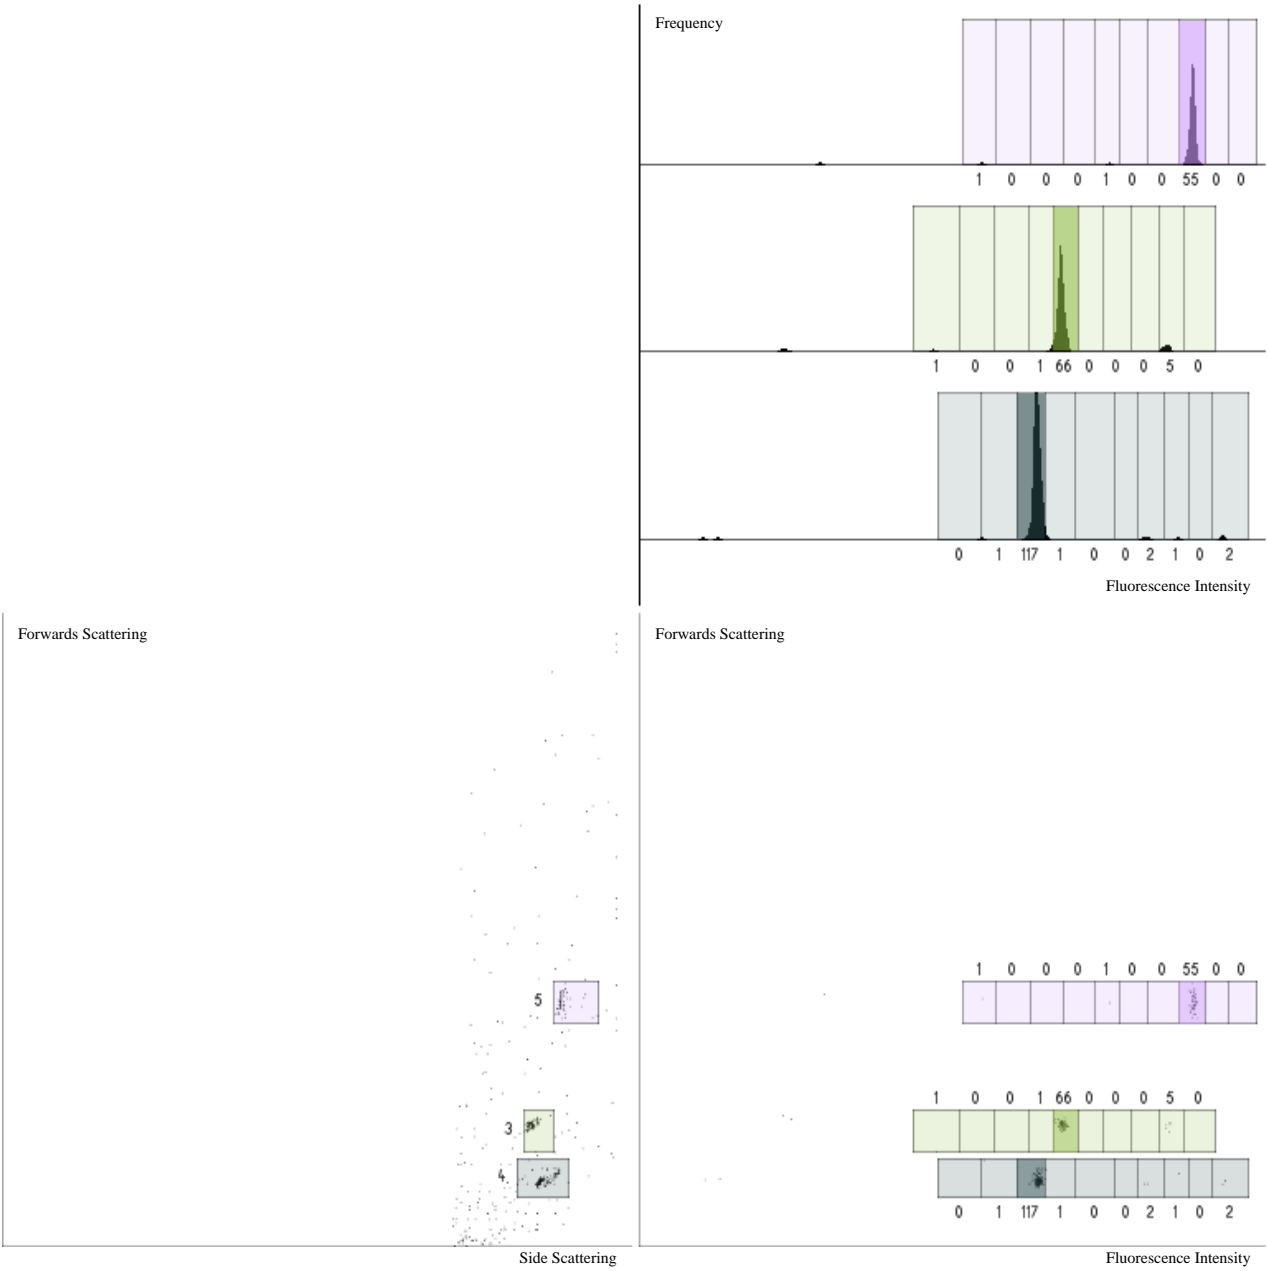

ANNEX 3: TAG DECONVOLUTION - BEAD 238

Passes flow sorting criteria: Yes  
Passes tag deconvolution criteria: Yes  
Included in protocol analysis: Yes  
Protocol: 6, 5, 2, 2  
Filename: Bin2\_plateA2\_G8.fcs  
Split 1: Petrol shading  
Split 2: Green shading  
Split 3: Violet shading

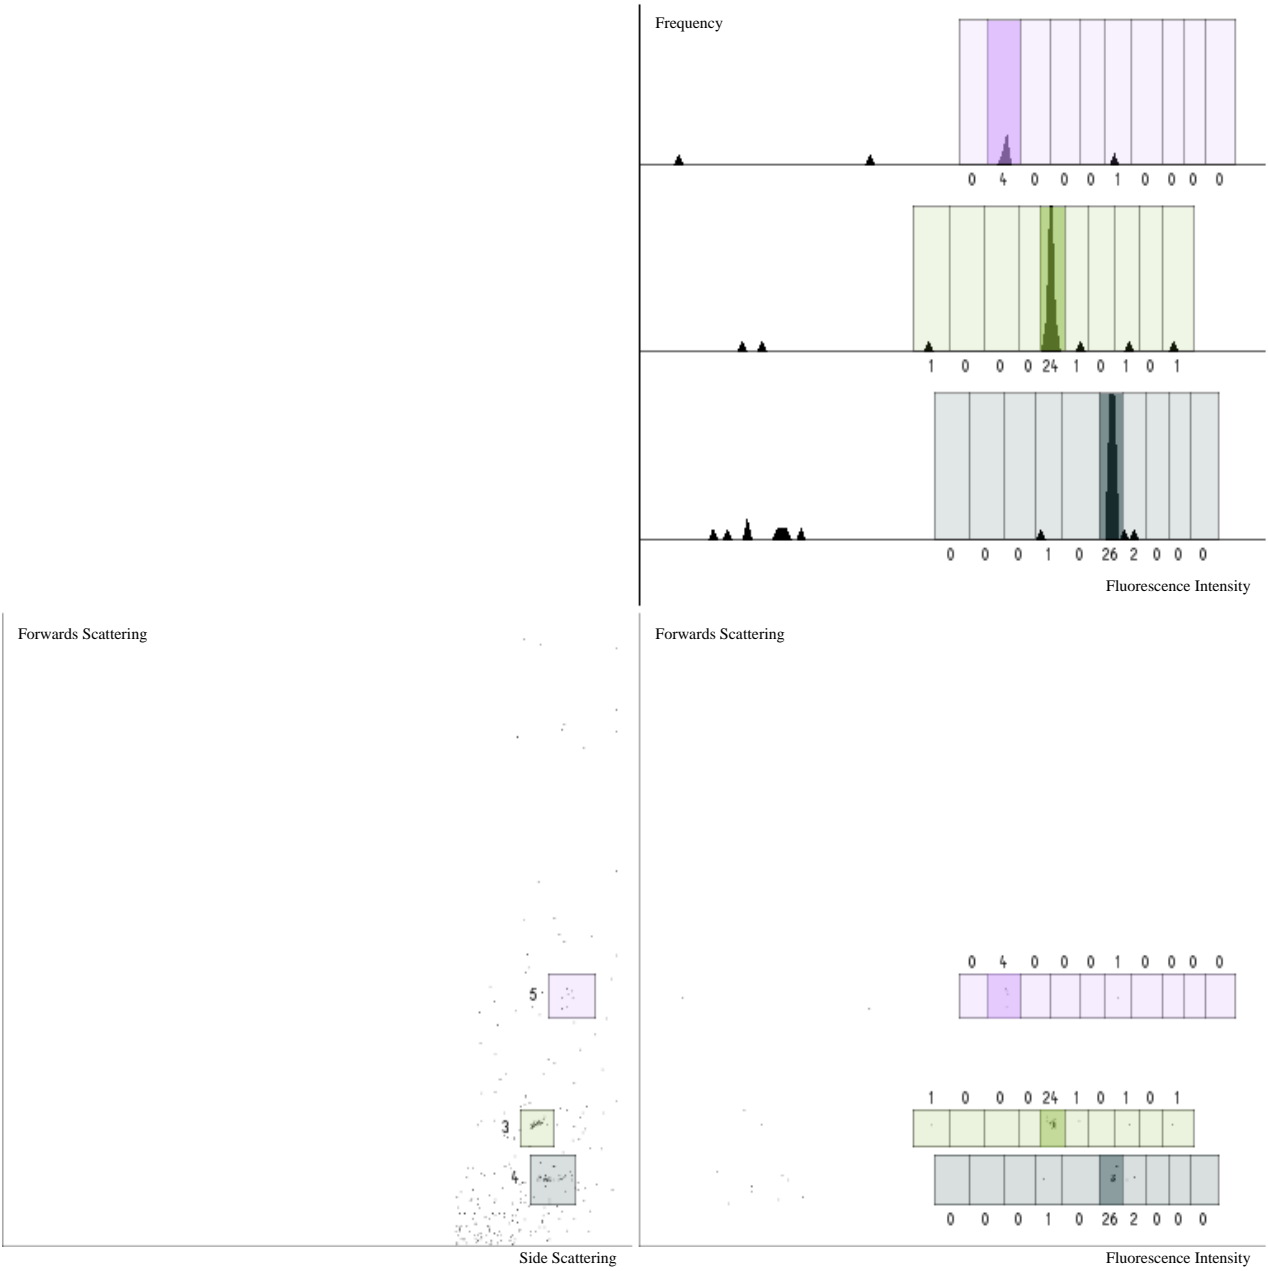



ANNEX 3: TAG DECONVOLUTION - BEAD 239

Passes flow sorting criteria: Yes  
Passes tag deconvolution criteria: Yes  
Included in protocol analysis: Yes  
Protocol: 5, 7, 6, 2  
Filename: Bin2\_plateA2\_E9.fcs  
Split 1: Petrol shading  
Split 2: Green shading  
Split 3: Violet shading

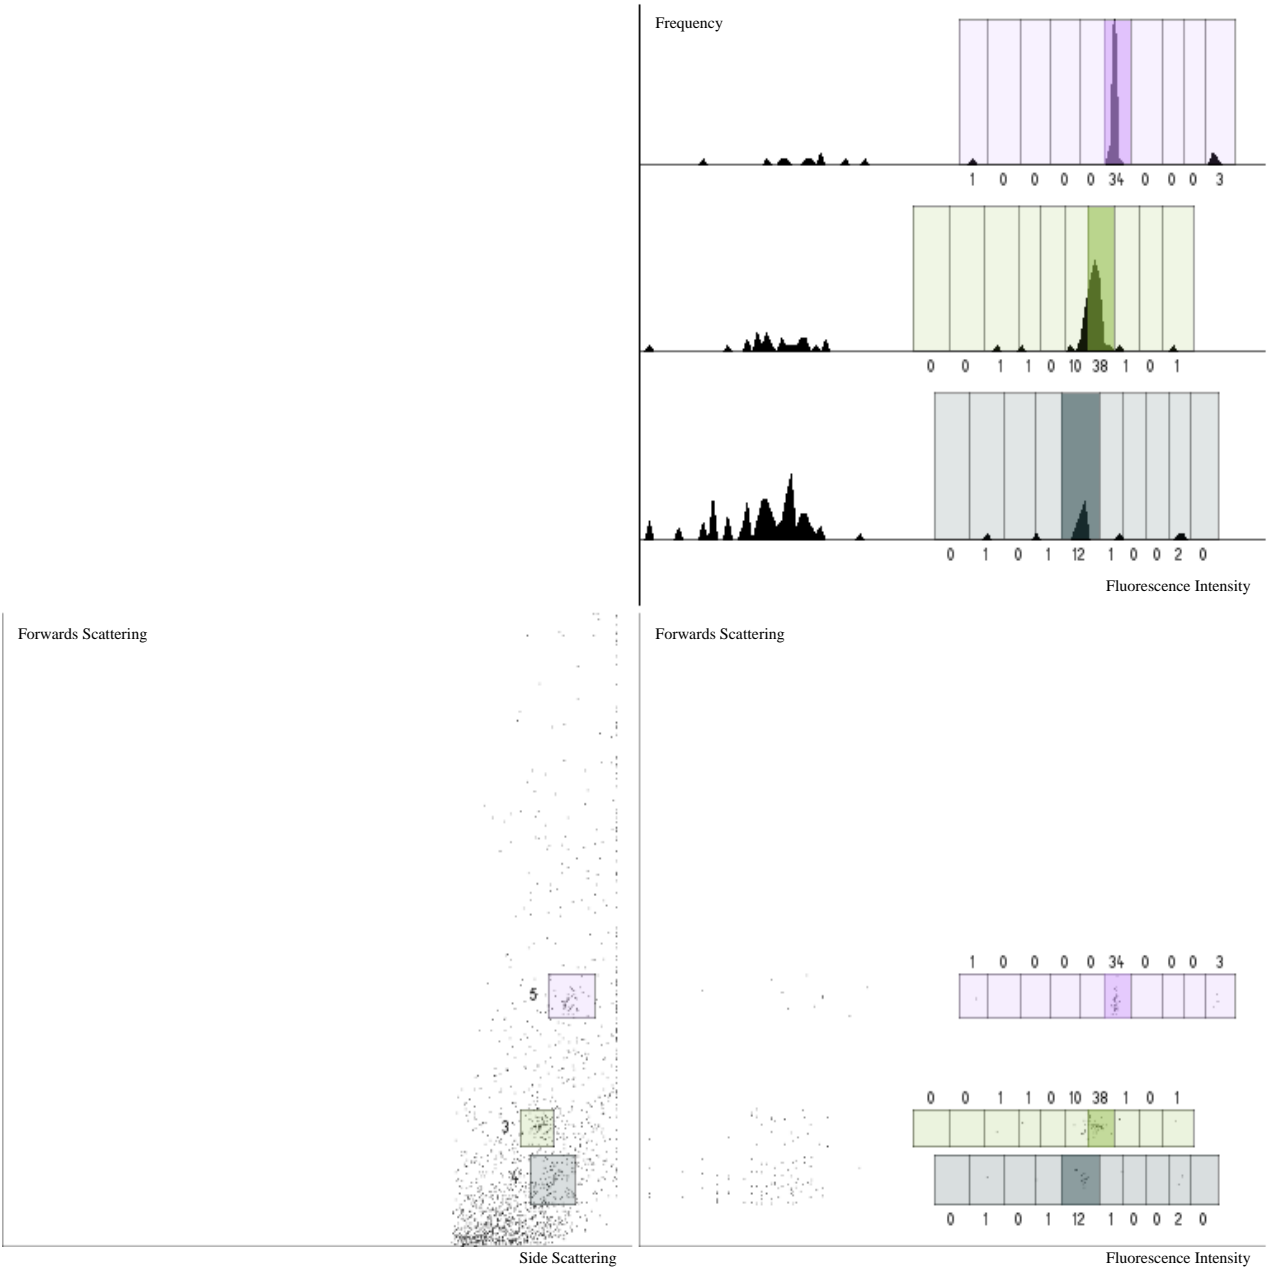

ANNEX 3: TAG DECONVOLUTION - BEAD 240

Passes flow sorting criteria: Yes  
Passes tag deconvolution criteria: Yes  
Included in protocol analysis: Yes  
Protocol: 10, 8, 9, 2  
Filename: Bin2\_plateA2\_E10.fcs  
Split 1: Petrol shading  
Split 2: Green shading  
Split 3: Violet shading

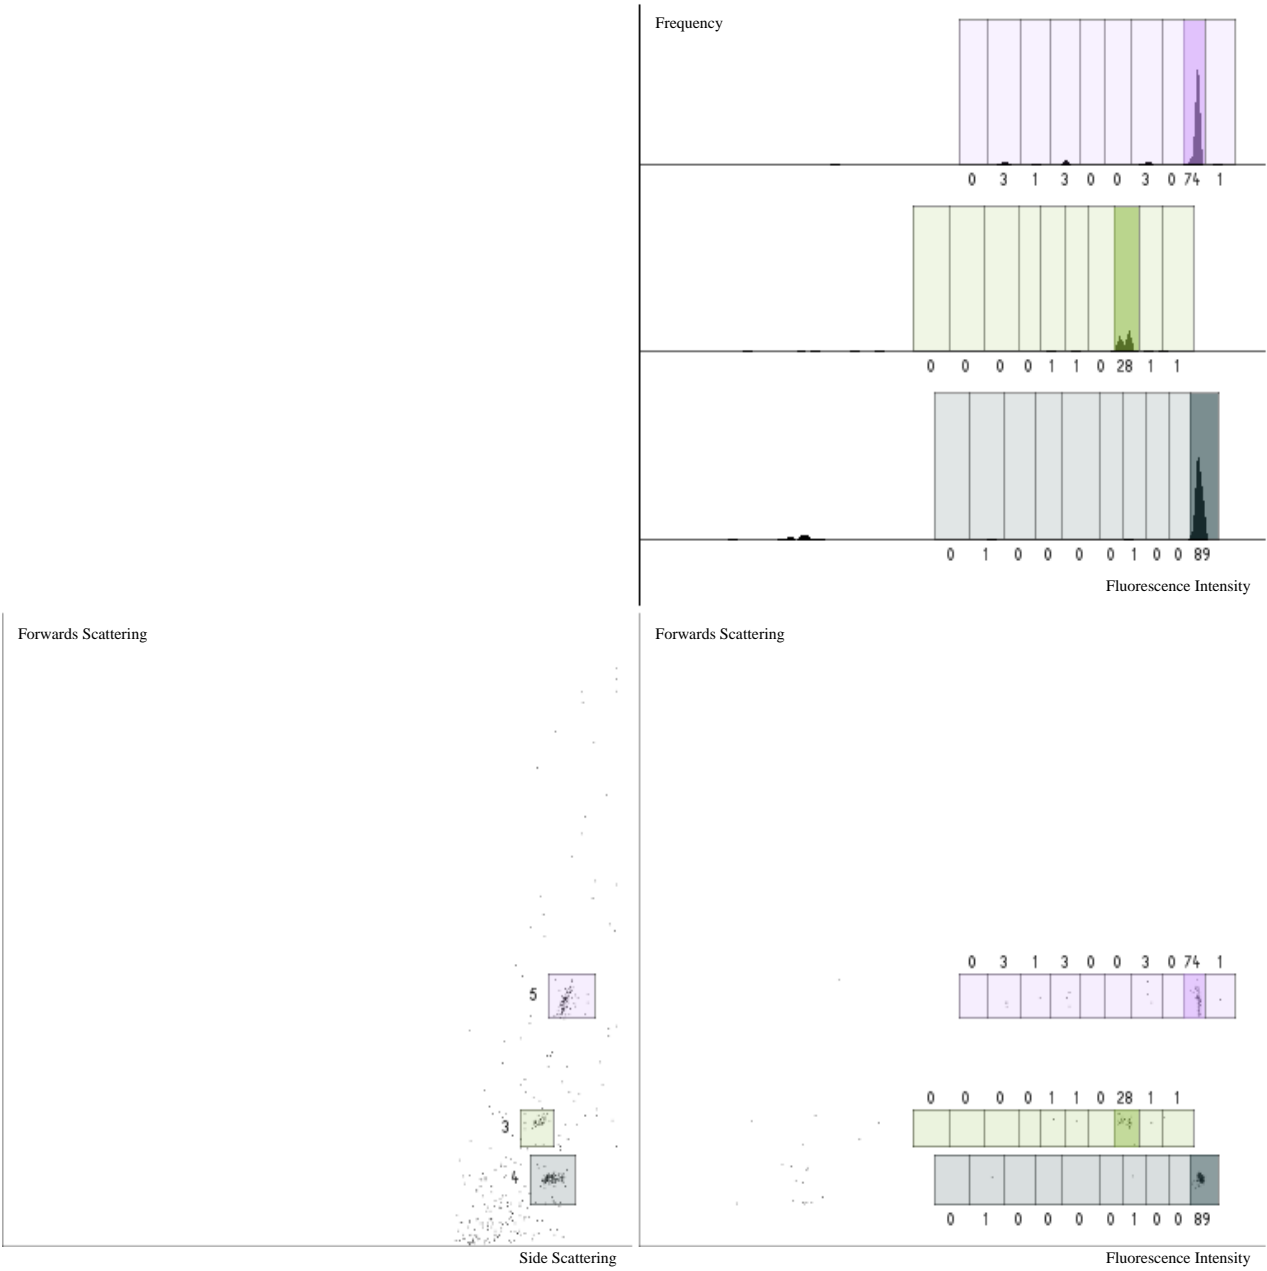

ANNEX 3: TAG DECONVOLUTION - BEAD 241

Passes flow sorting criteria: Yes  
Passes tag deconvolution criteria: No  
Included in protocol analysis: No  
Protocol: N/A  
Filename: Bin2\_plateA2\_E11.fcs  
Split 1: Petrol shading  
Split 2: Green shading  
Split 3: Violet shading

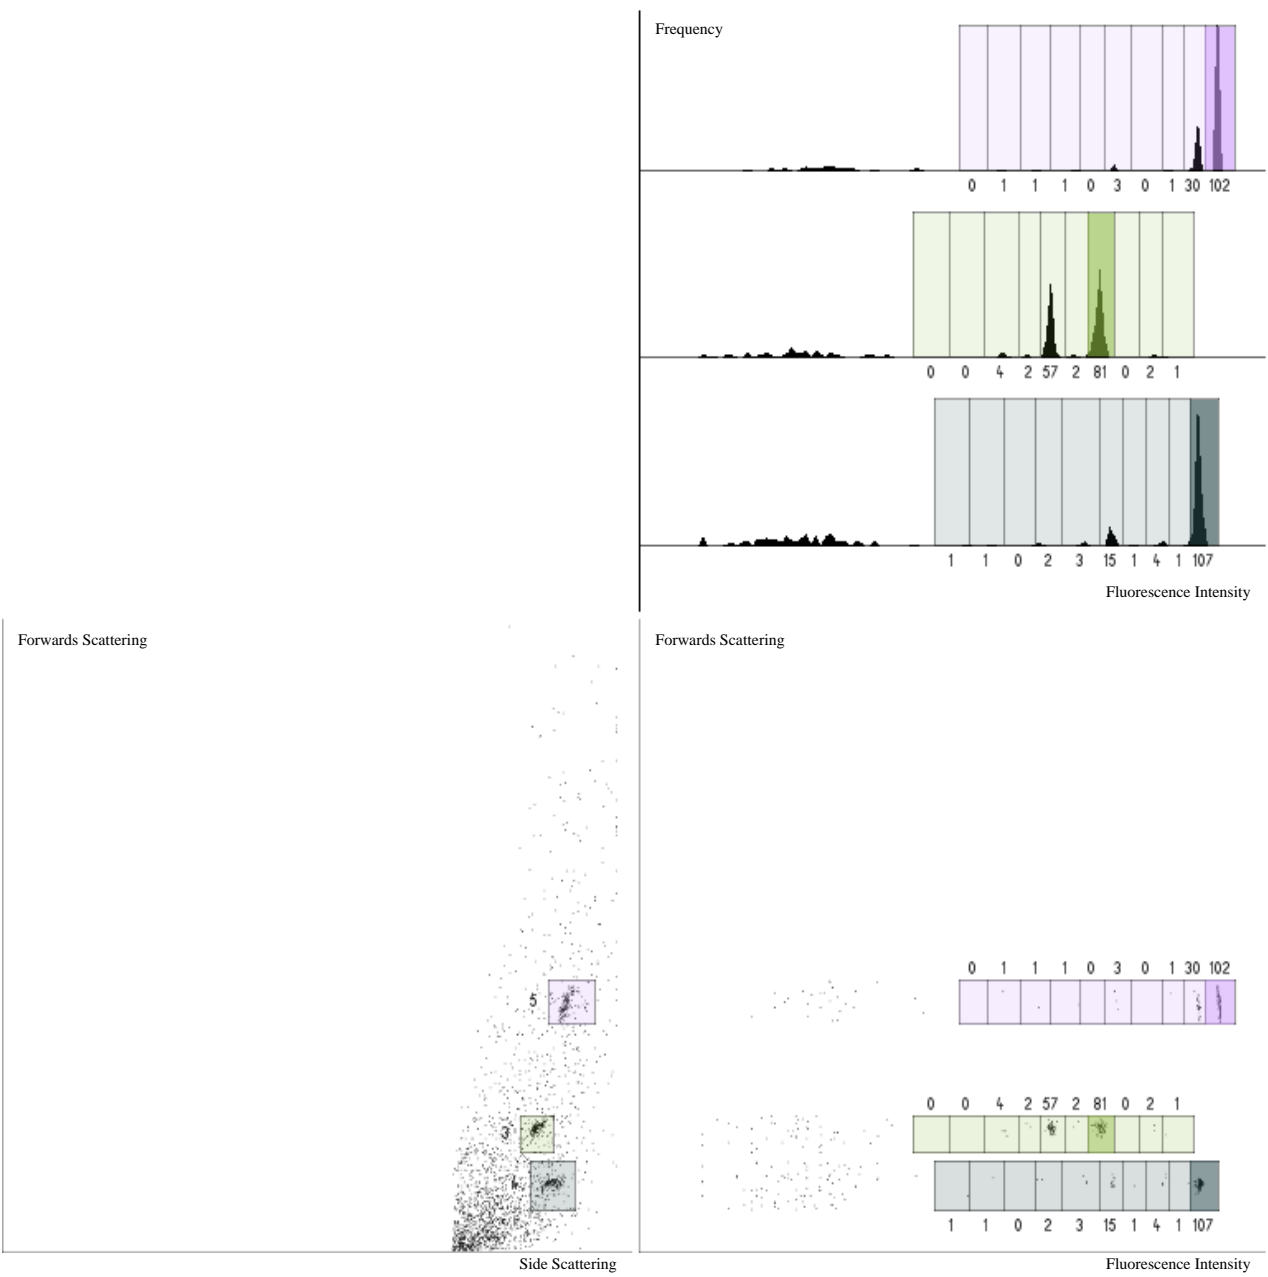

ANNEX 3: TAG DECONVOLUTION - BEAD 242

Passes flow sorting criteria: Yes  
Passes tag deconvolution criteria: Yes  
Included in protocol analysis: Yes  
Protocol: 6, 4, 6, 2  
Filename: Bin2\_plateA2\_E12.fcs  
Split 1: Petrol shading  
Split 2: Green shading  
Split 3: Violet shading

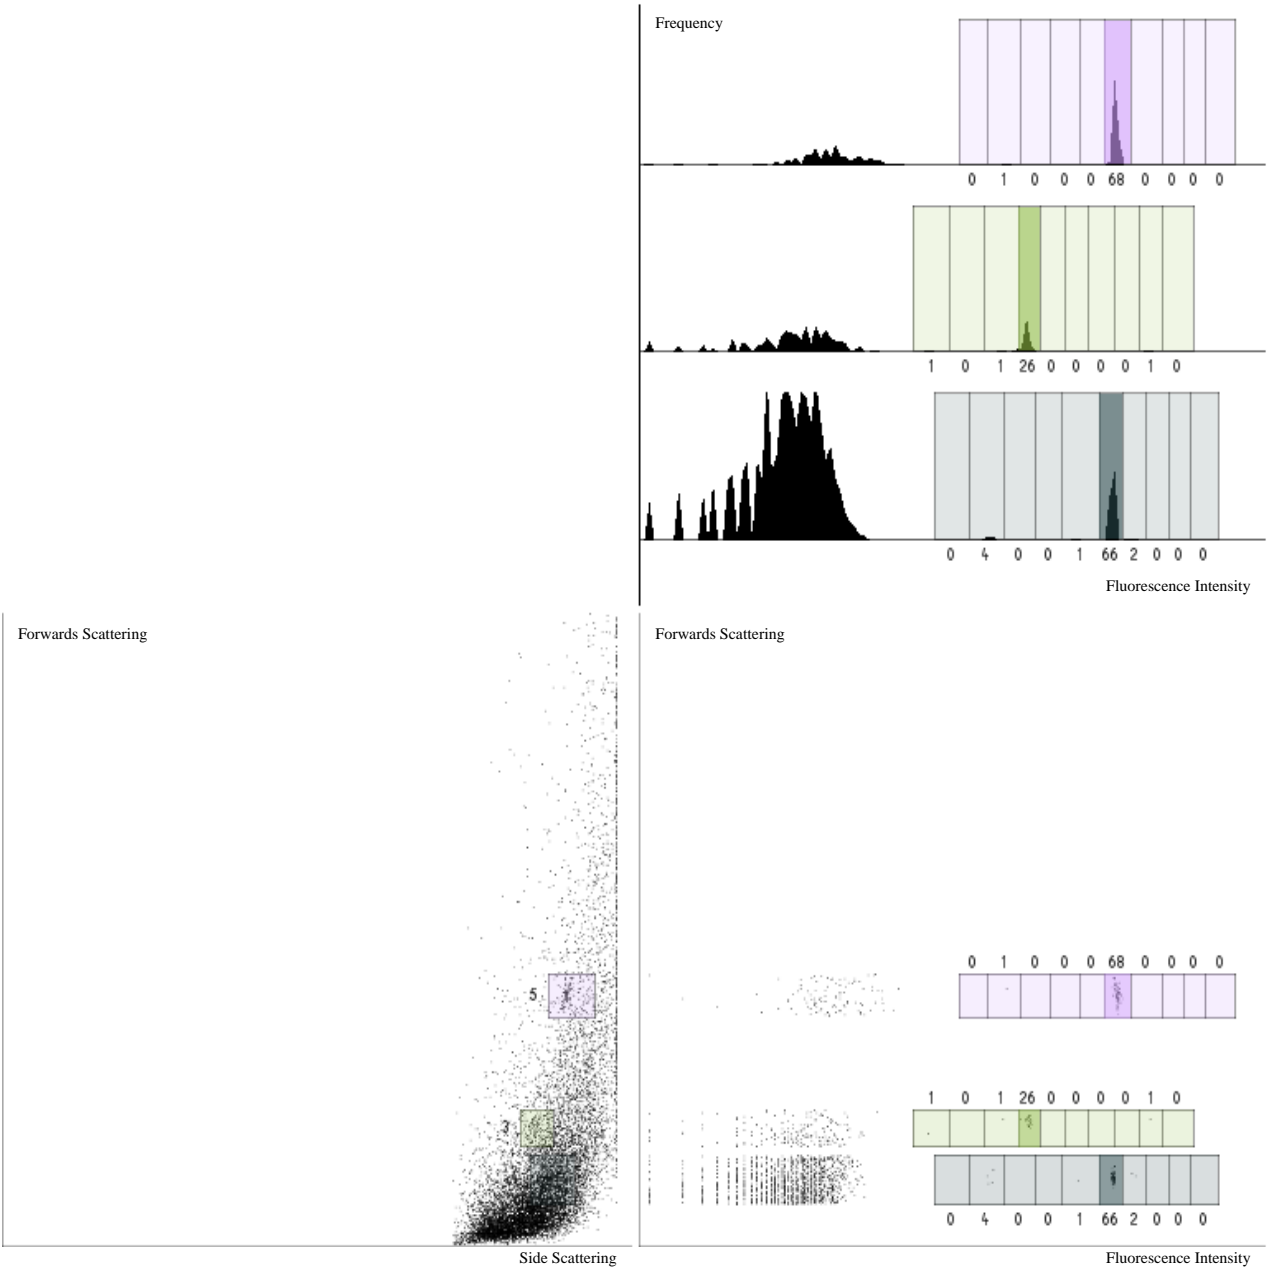

ANNEX 3: TAG DECONVOLUTION - BEAD 243

Passes flow sorting criteria: Yes  
Passes tag deconvolution criteria: Yes  
Included in protocol analysis: Yes  
Protocol: 4, 4, 10, 2  
Filename: Bin2\_plateA2\_F1.fcs  
Split 1: Petrol shading  
Split 2: Green shading  
Split 3: Violet shading

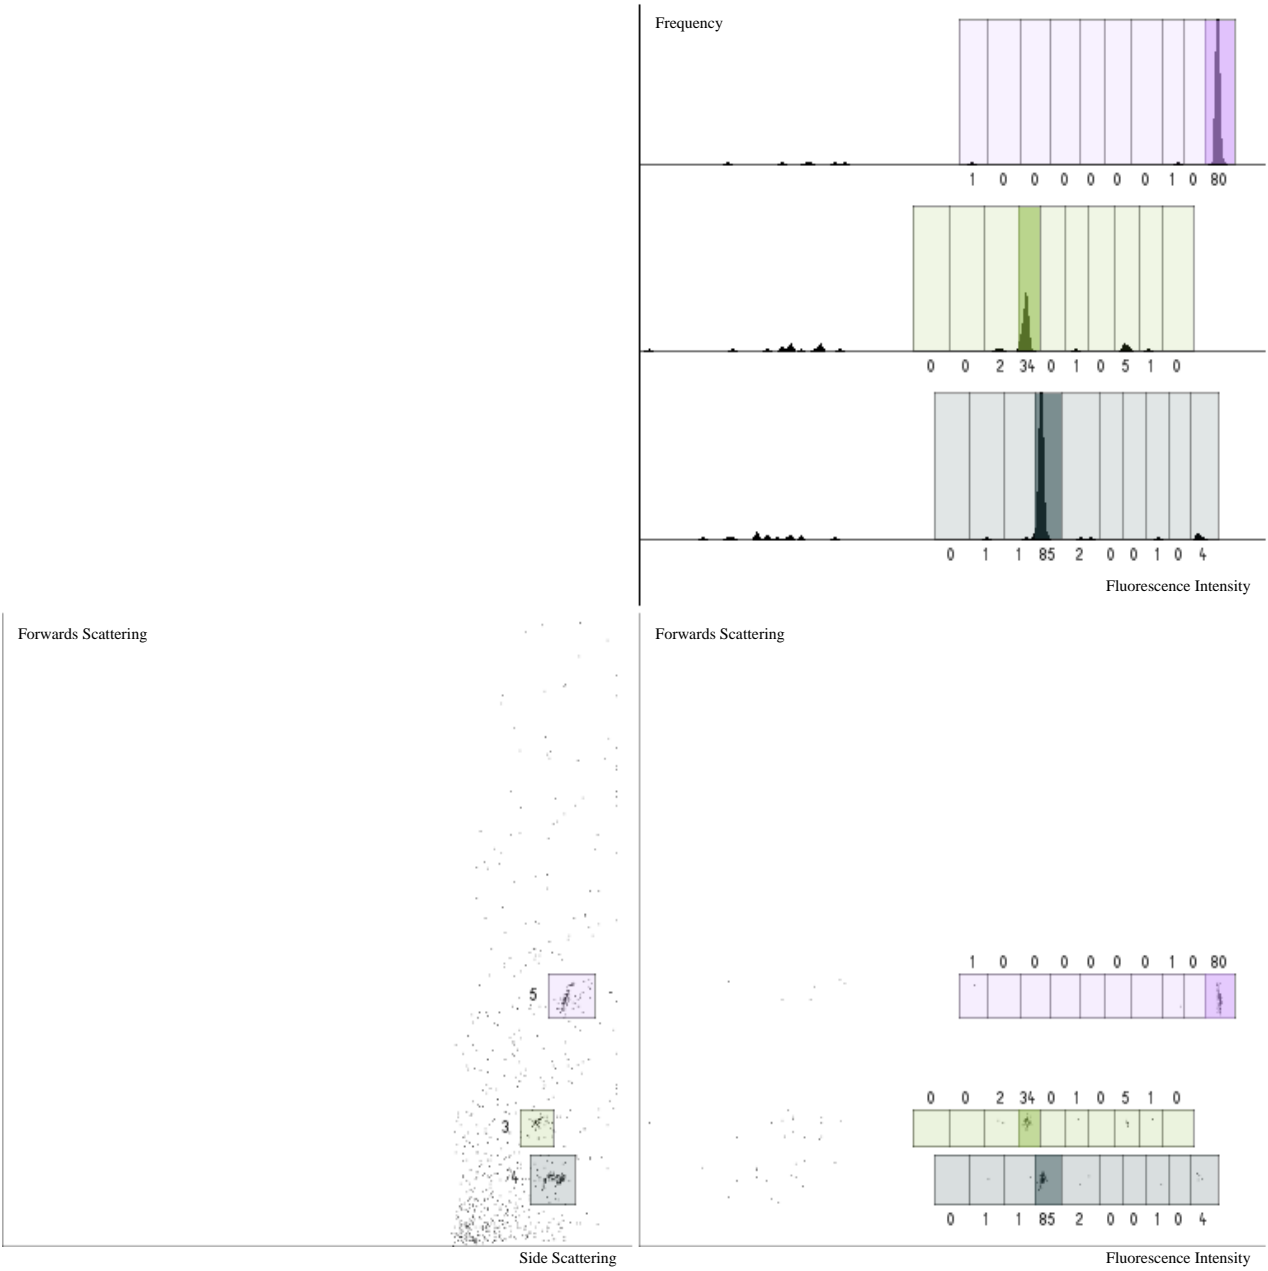

ANNEX 3: TAG DECONVOLUTION - BEAD 244

Passes flow sorting criteria: Yes  
Passes tag deconvolution criteria: Yes  
Included in protocol analysis: Yes  
Protocol: 8, 10, 9, 2  
Filename: Bin2\_plateA2\_F2.fcs  
Split 1: Petrol shading  
Split 2: Green shading  
Split 3: Violet shading

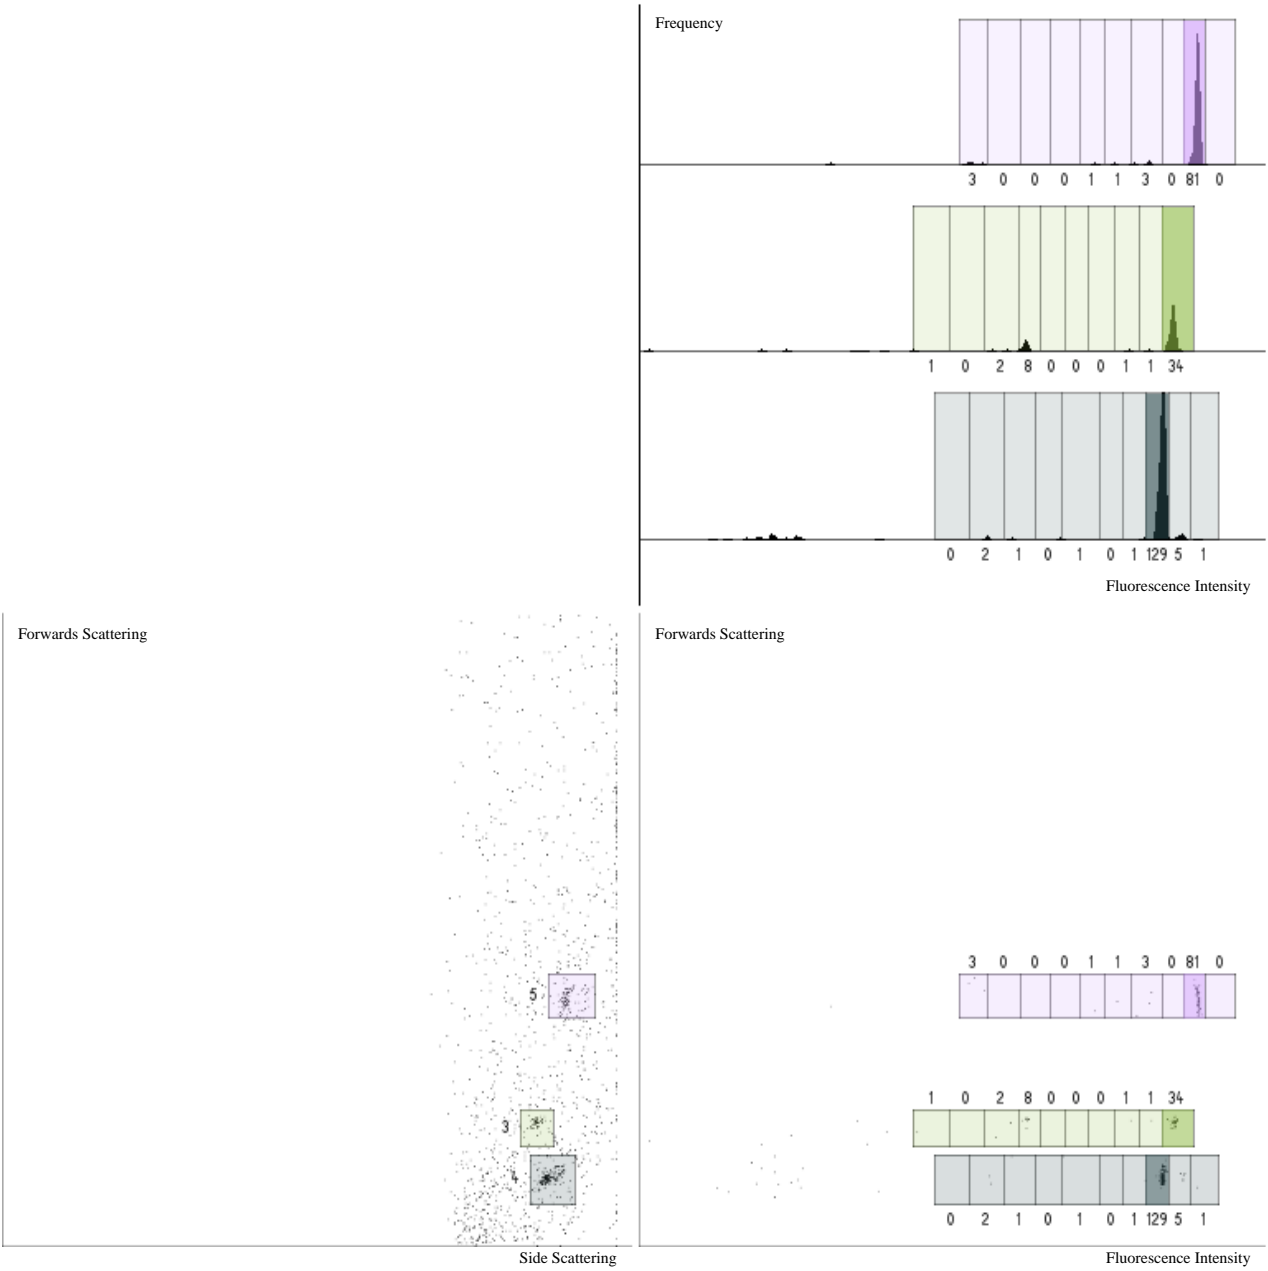

ANNEX 3: TAG DECONVOLUTION - BEAD 245

Passes flow sorting criteria: Yes  
Passes tag deconvolution criteria: Yes  
Included in protocol analysis: Yes  
Protocol: 5, 4, 7, 2  
Filename: Bin2\_plateA2\_F3.fcs  
Split 1: Petrol shading  
Split 2: Green shading  
Split 3: Violet shading

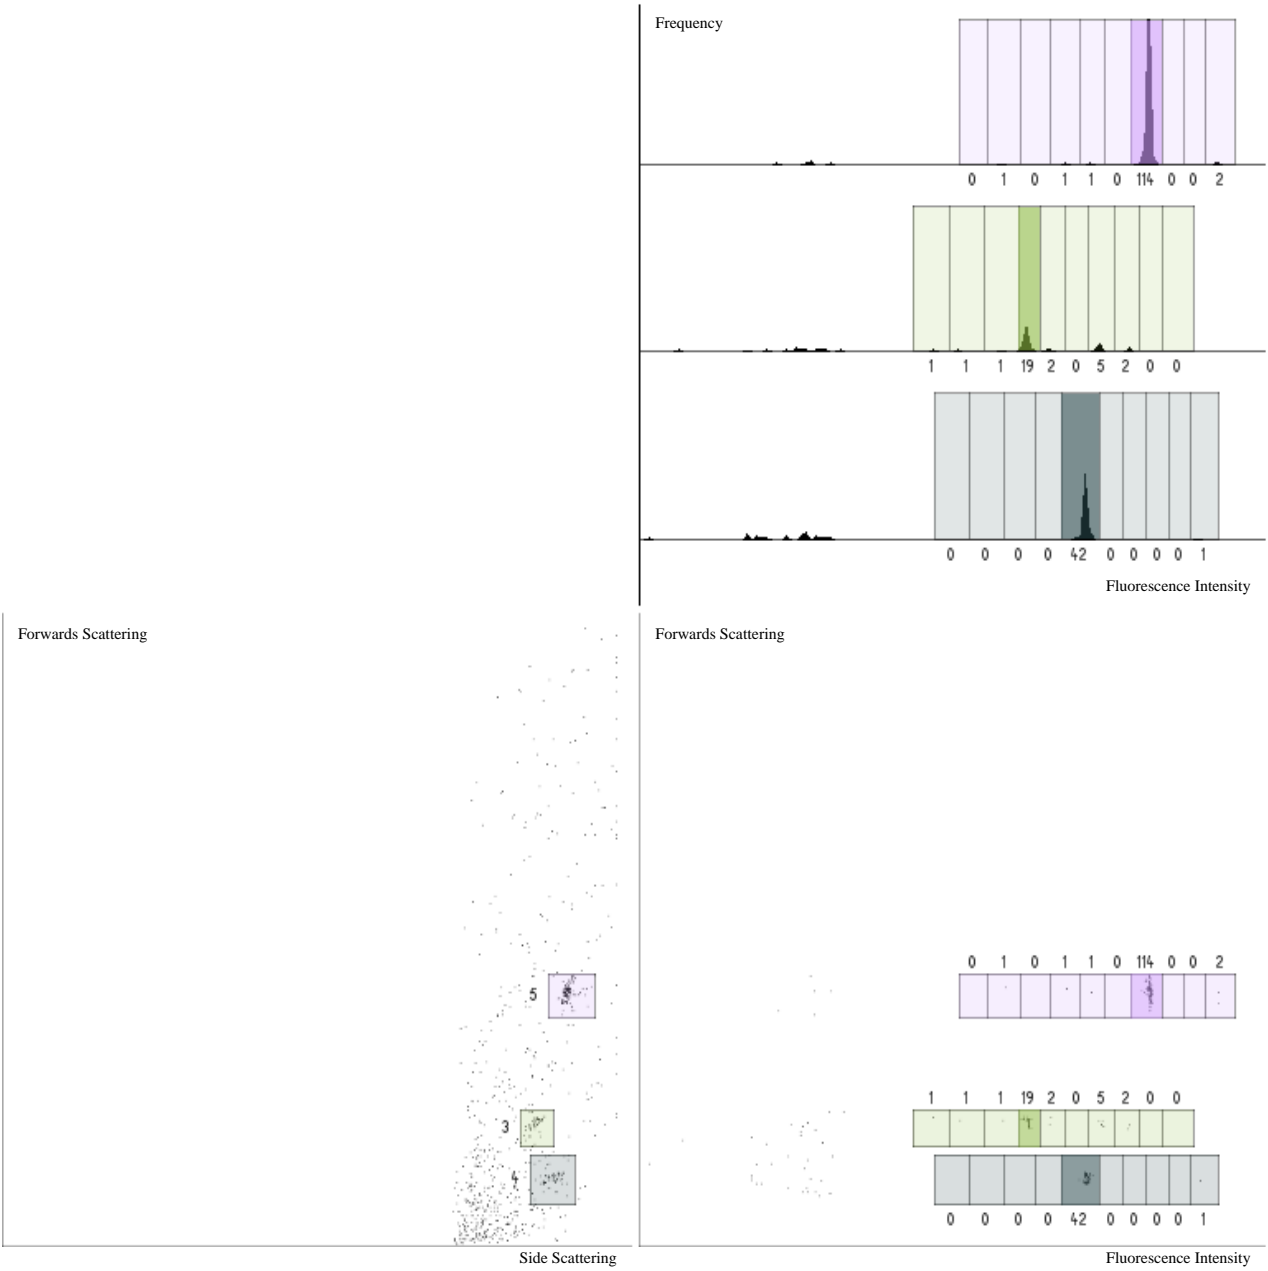

ANNEX 3: TAG DECONVOLUTION - BEAD 246

Passes flow sorting criteria: Yes  
Passes tag deconvolution criteria: Yes  
Included in protocol analysis: Yes  
Protocol: 5, 9, 1, 2  
Filename: Bin2\_plateA2\_F4.fcs  
Split 1: Petrol shading  
Split 2: Green shading  
Split 3: Violet shading

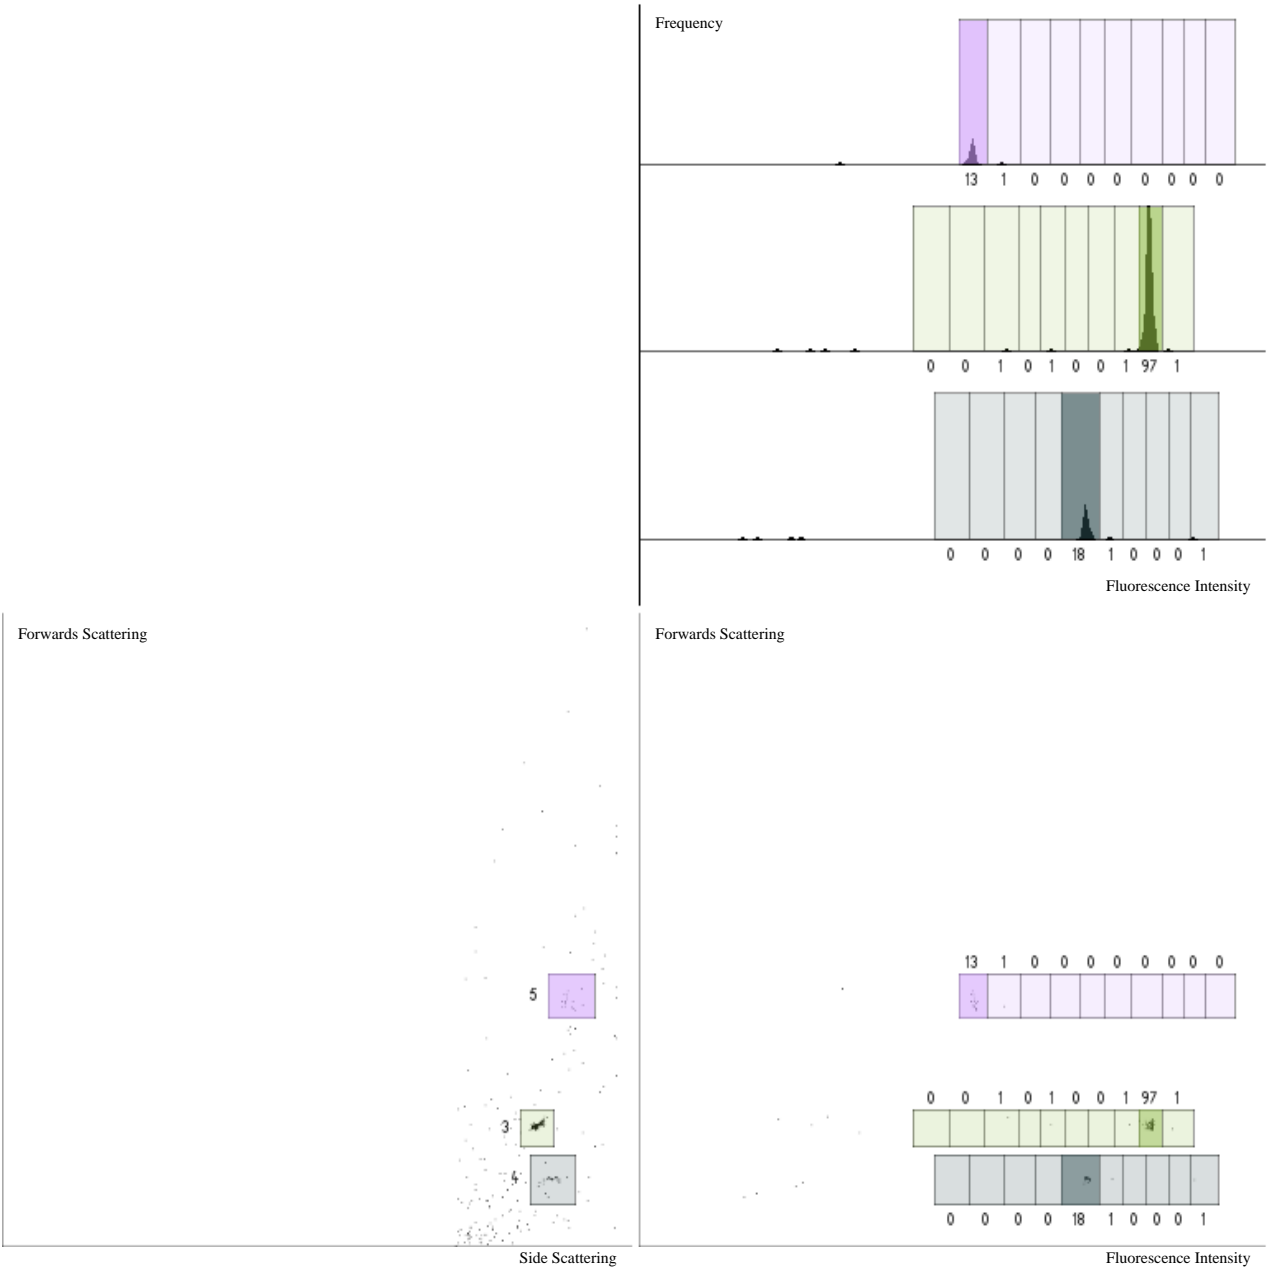



ANNEX 3: TAG DECONVOLUTION - BEAD 247

Passes flow sorting criteria: Yes  
Passes tag deconvolution criteria: Yes  
Included in protocol analysis: Yes  
Protocol: 9, 10, 9, 2  
Filename: Bin2\_plateA2\_F5.fcs  
Split 1: Petrol shading  
Split 2: Green shading  
Split 3: Violet shading

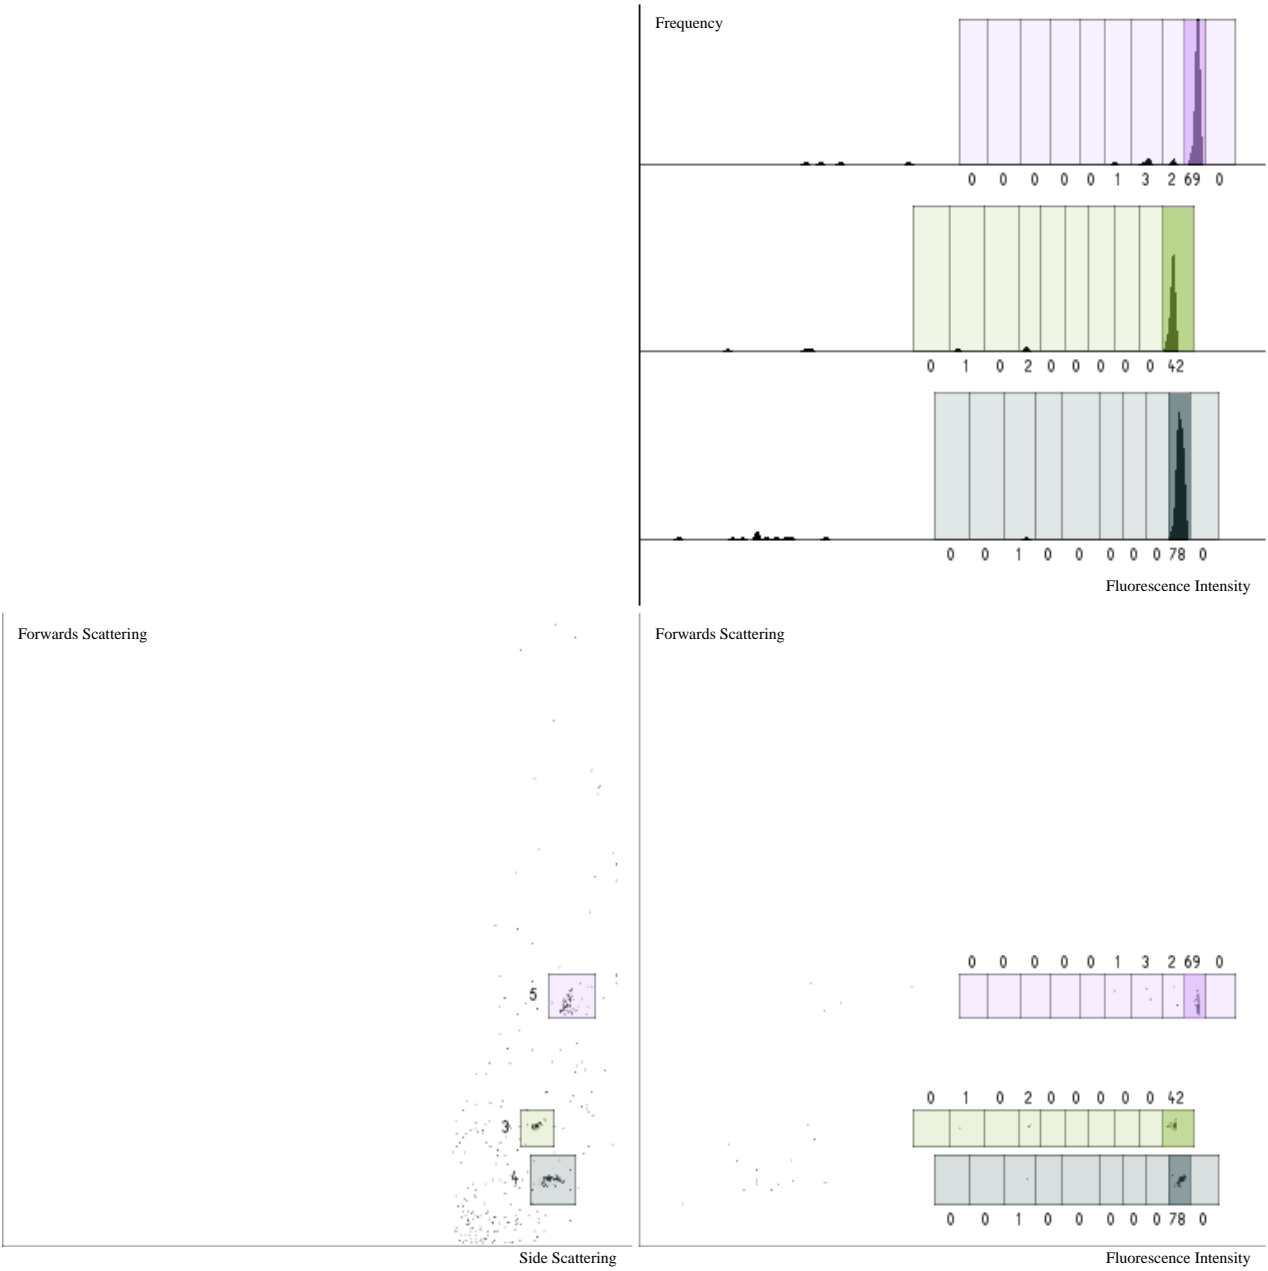

ANNEX 3: TAG DECONVOLUTION - BEAD 248

Passes flow sorting criteria: Yes  
Passes tag deconvolution criteria: Yes  
Included in protocol analysis: Yes  
Protocol: 5, 6, 6, 2  
Filename: Bin2\_plateA2\_F6.fcs  
Split 1: Petrol shading  
Split 2: Green shading  
Split 3: Violet shading

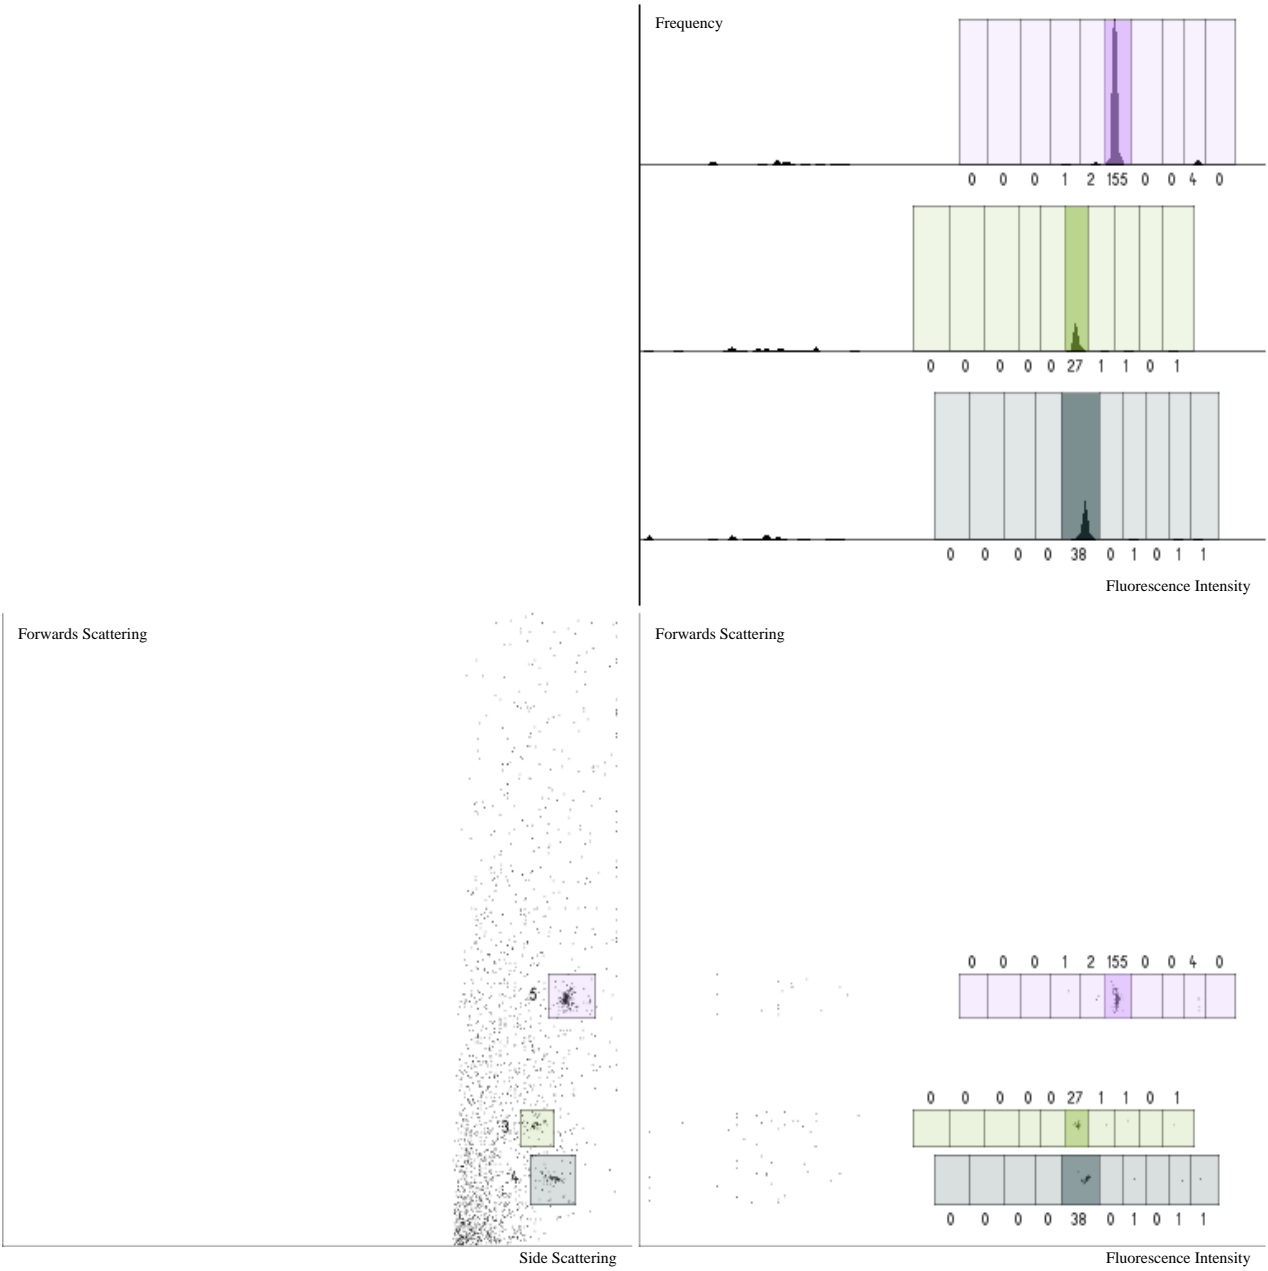

ANNEX 3: TAG DECONVOLUTION - BEAD 249

Passes flow sorting criteria: Yes  
Passes tag deconvolution criteria: Yes  
Included in protocol analysis: Yes  
Protocol: 4, 10, 7, 2  
Filename: Bin2\_plateA2\_F7.fcs  
Split 1: Petrol shading  
Split 2: Green shading  
Split 3: Violet shading

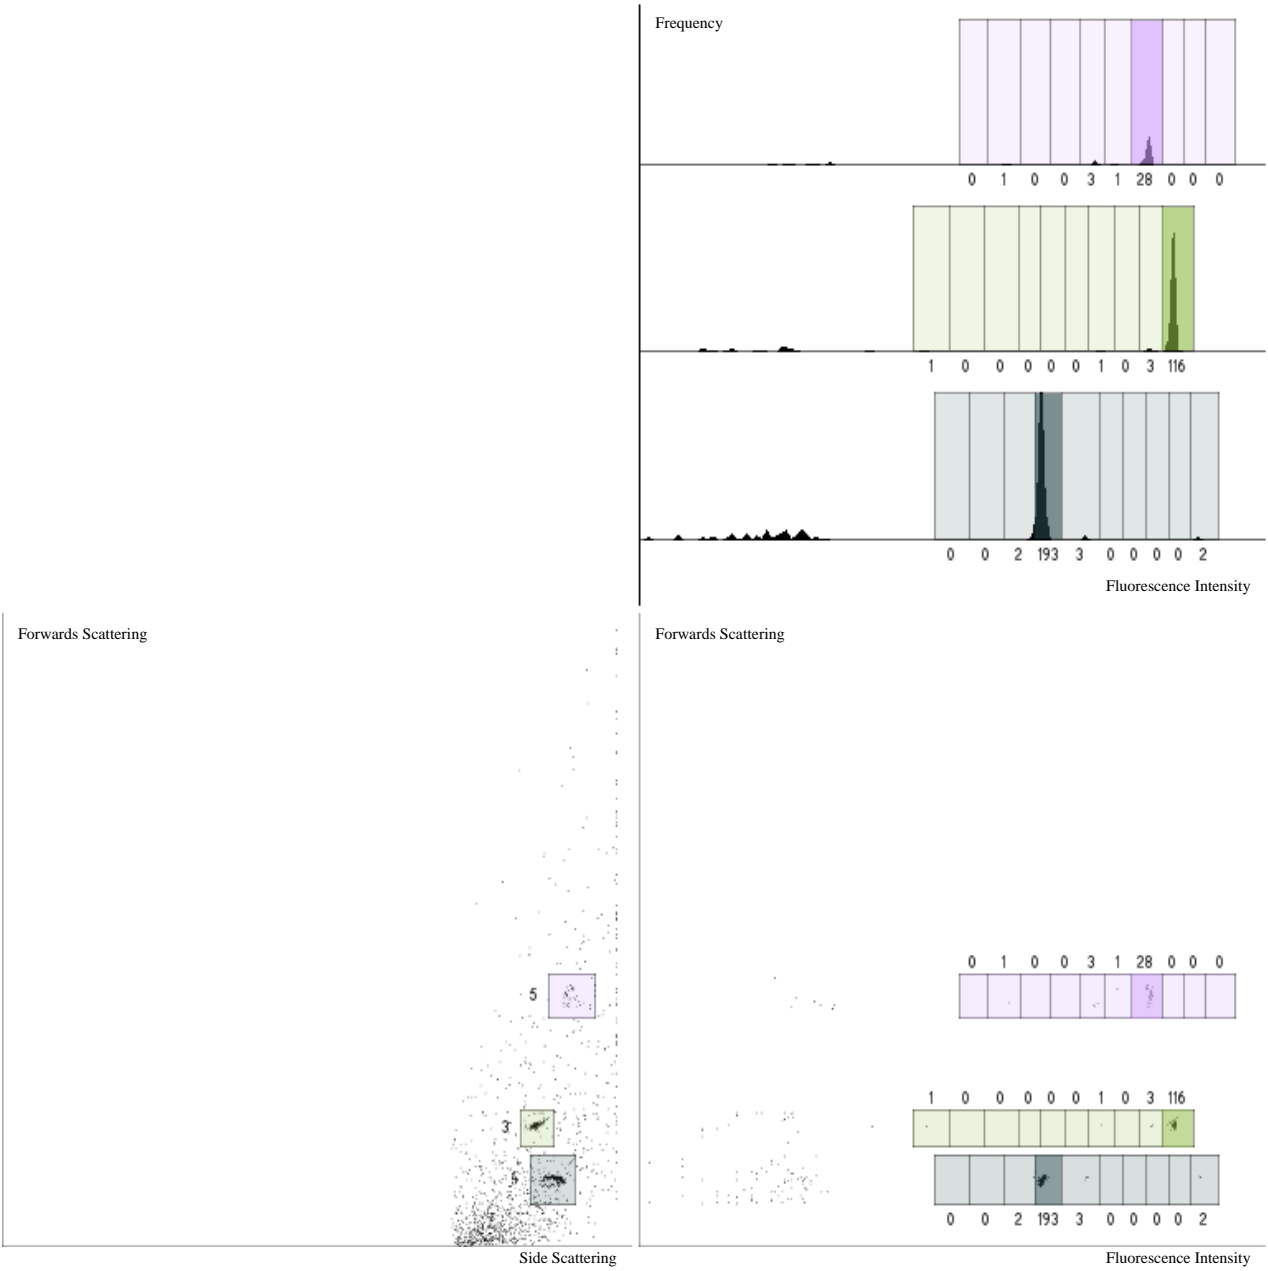

ANNEX 3: TAG DECONVOLUTION - BEAD 250

Passes flow sorting criteria: Yes  
Passes tag deconvolution criteria: No  
Included in protocol analysis: No  
Protocol: N/A  
Filename: Bin2\_plateA2\_F8.fcs  
Split 1: Petrol shading  
Split 2: Green shading  
Split 3: Violet shading

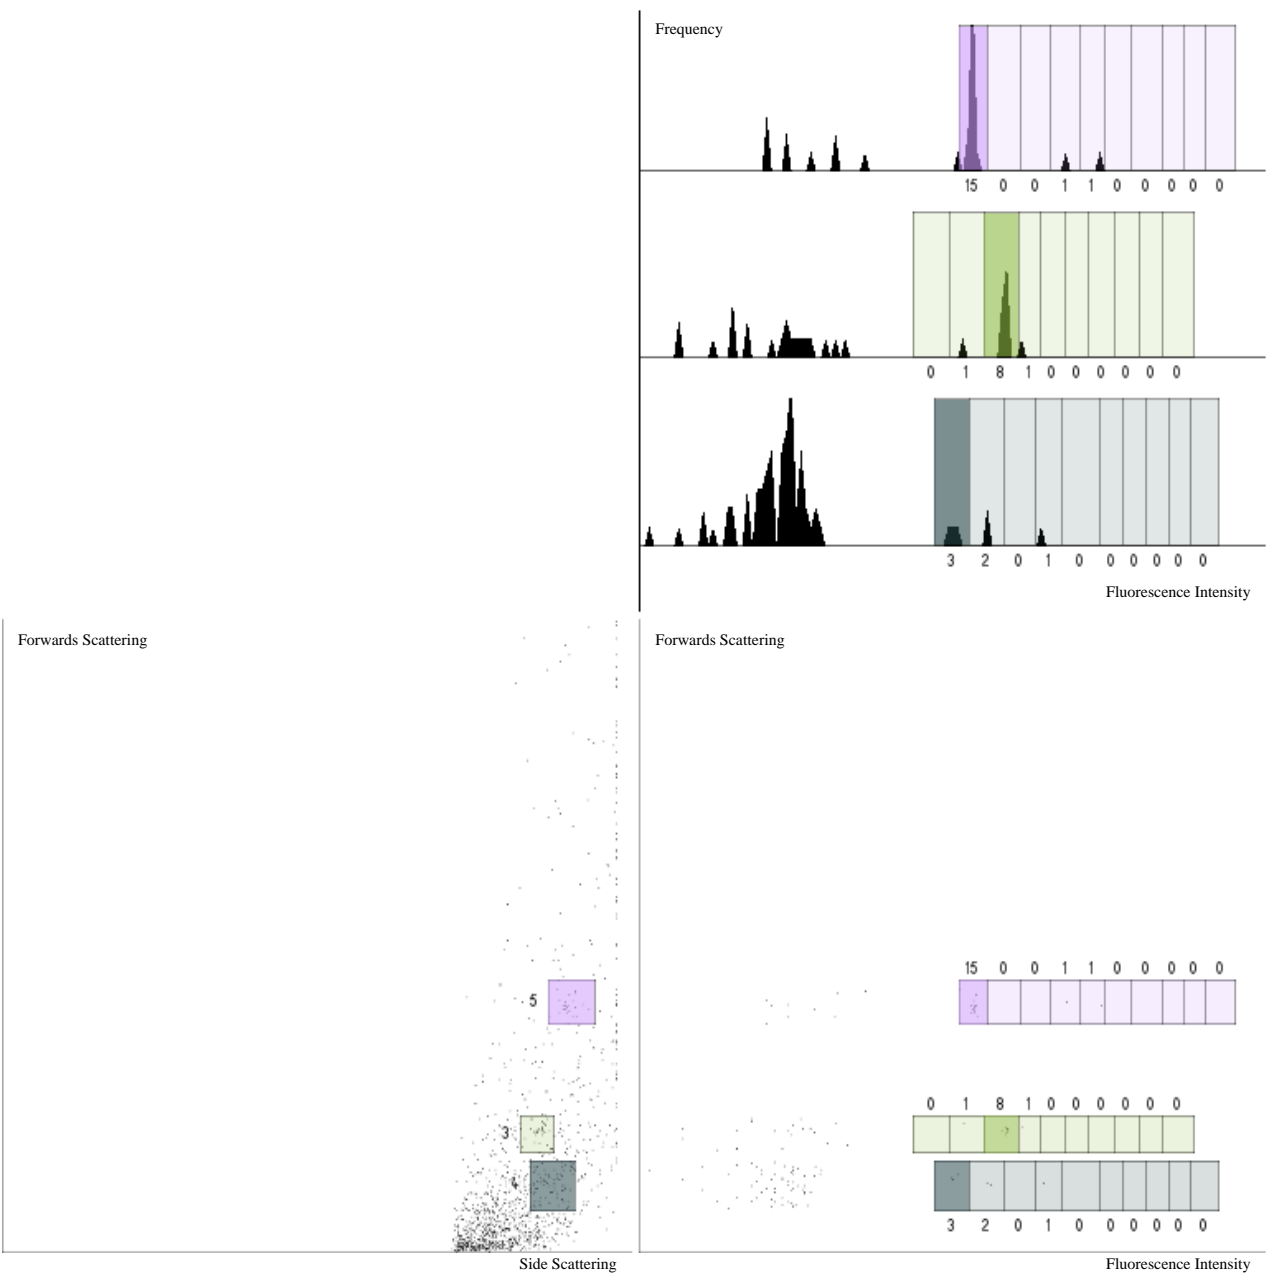

ANNEX 3: TAG DECONVOLUTION - BEAD 251

Passes flow sorting criteria: Yes  
Passes tag deconvolution criteria: Yes  
Included in protocol analysis: Yes  
Protocol: 3, 4, 6, 2  
Filename: Bin2\_plateA2\_F9.fcs  
Split 1: Petrol shading  
Split 2: Green shading  
Split 3: Violet shading

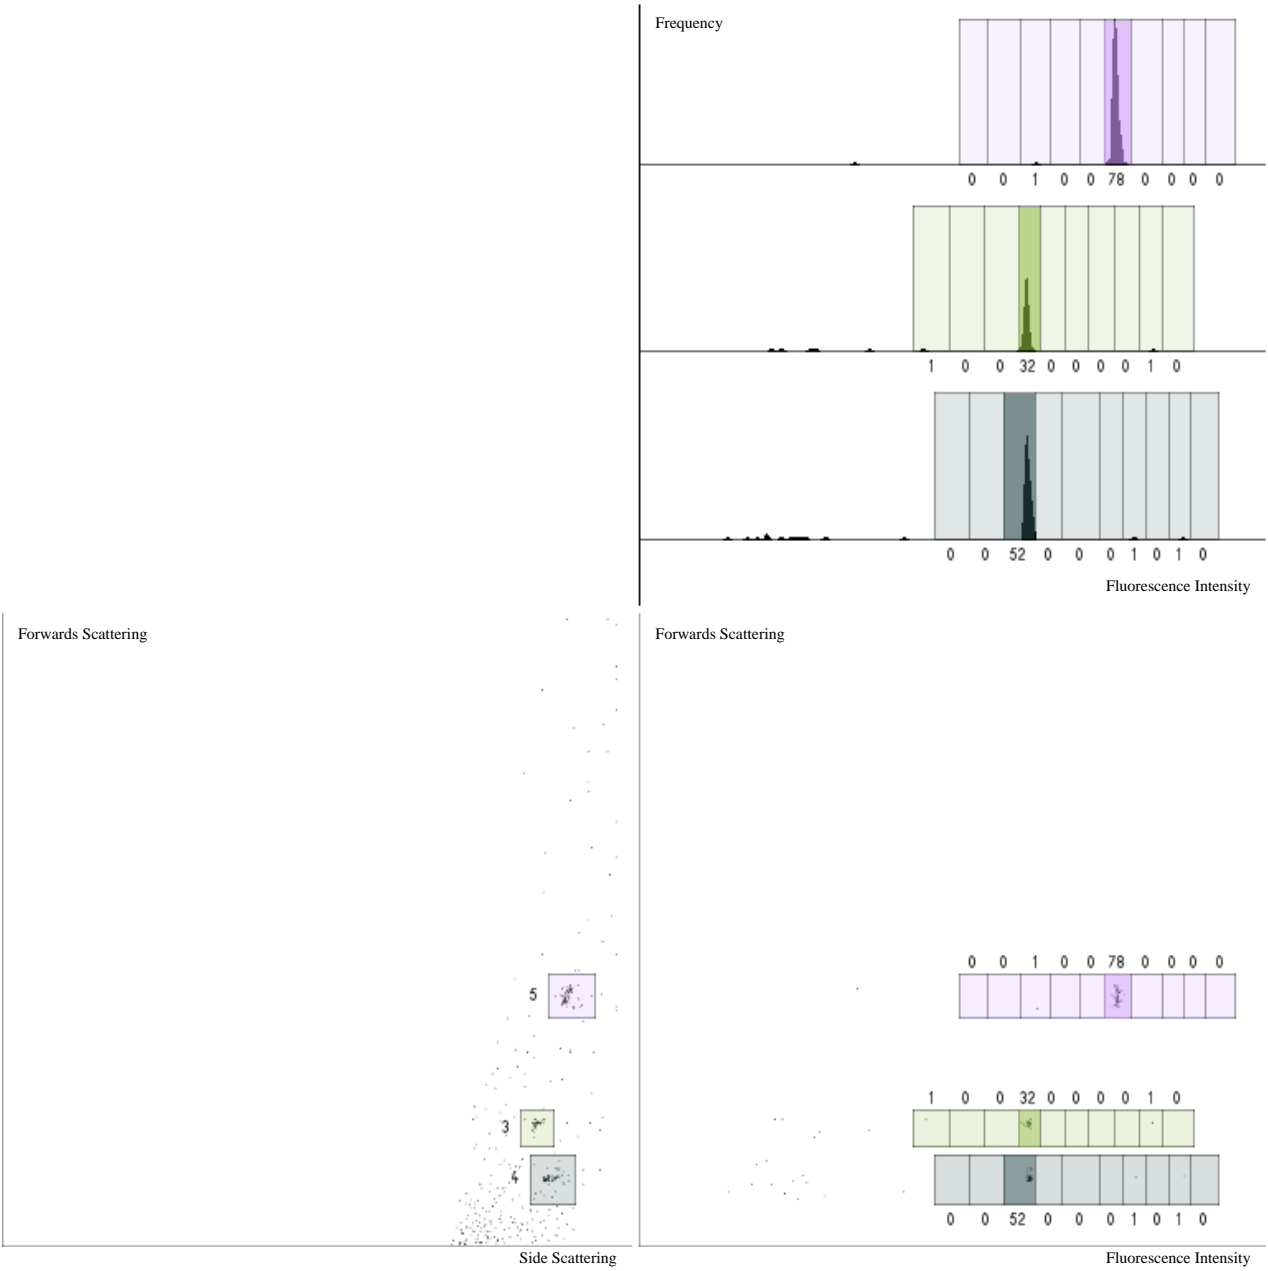

ANNEX 3: TAG DECONVOLUTION - BEAD 252

Passes flow sorting criteria: Yes  
Passes tag deconvolution criteria: Yes  
Included in protocol analysis: Yes  
Protocol: 5, 10, 10, 2  
Filename: Bin2\_plateA2\_F10.fcs  
Split 1: Petrol shading  
Split 2: Green shading  
Split 3: Violet shading

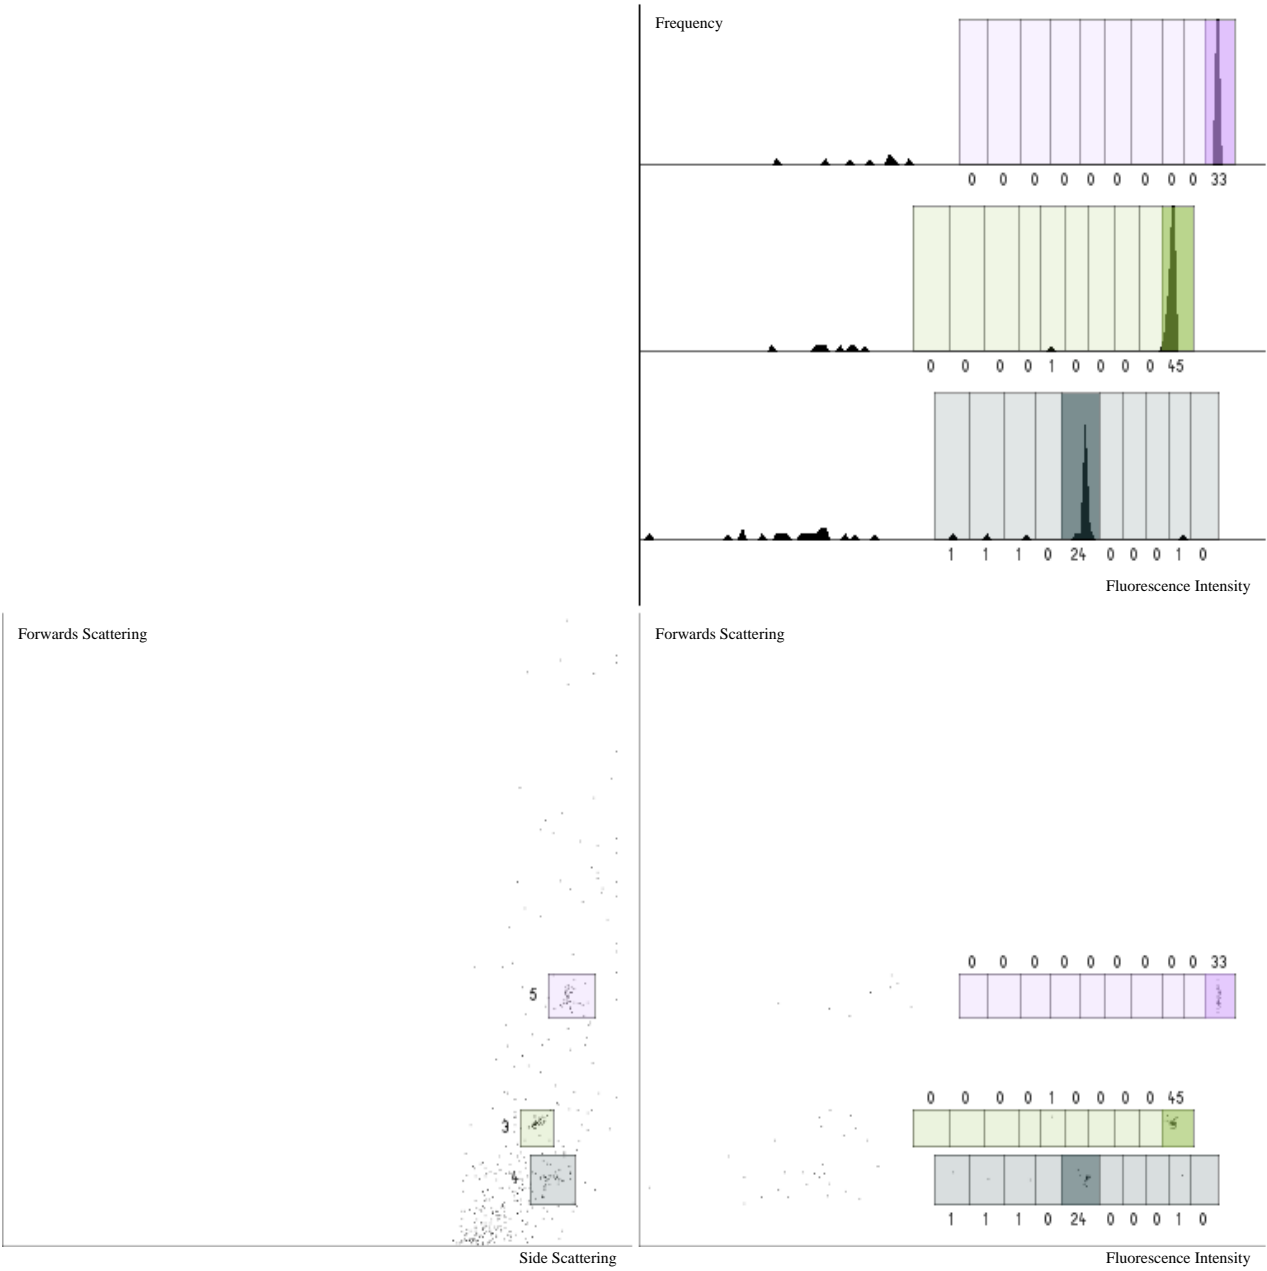

ANNEX 3: TAG DECONVOLUTION - BEAD 253

Passes flow sorting criteria: Yes  
Passes tag deconvolution criteria: Yes  
Included in protocol analysis: Yes  
Protocol: 3, 3, 5, 2  
Filename: Bin2\_plateA2\_F11.fcs  
Split 1: Petrol shading  
Split 2: Green shading  
Split 3: Violet shading

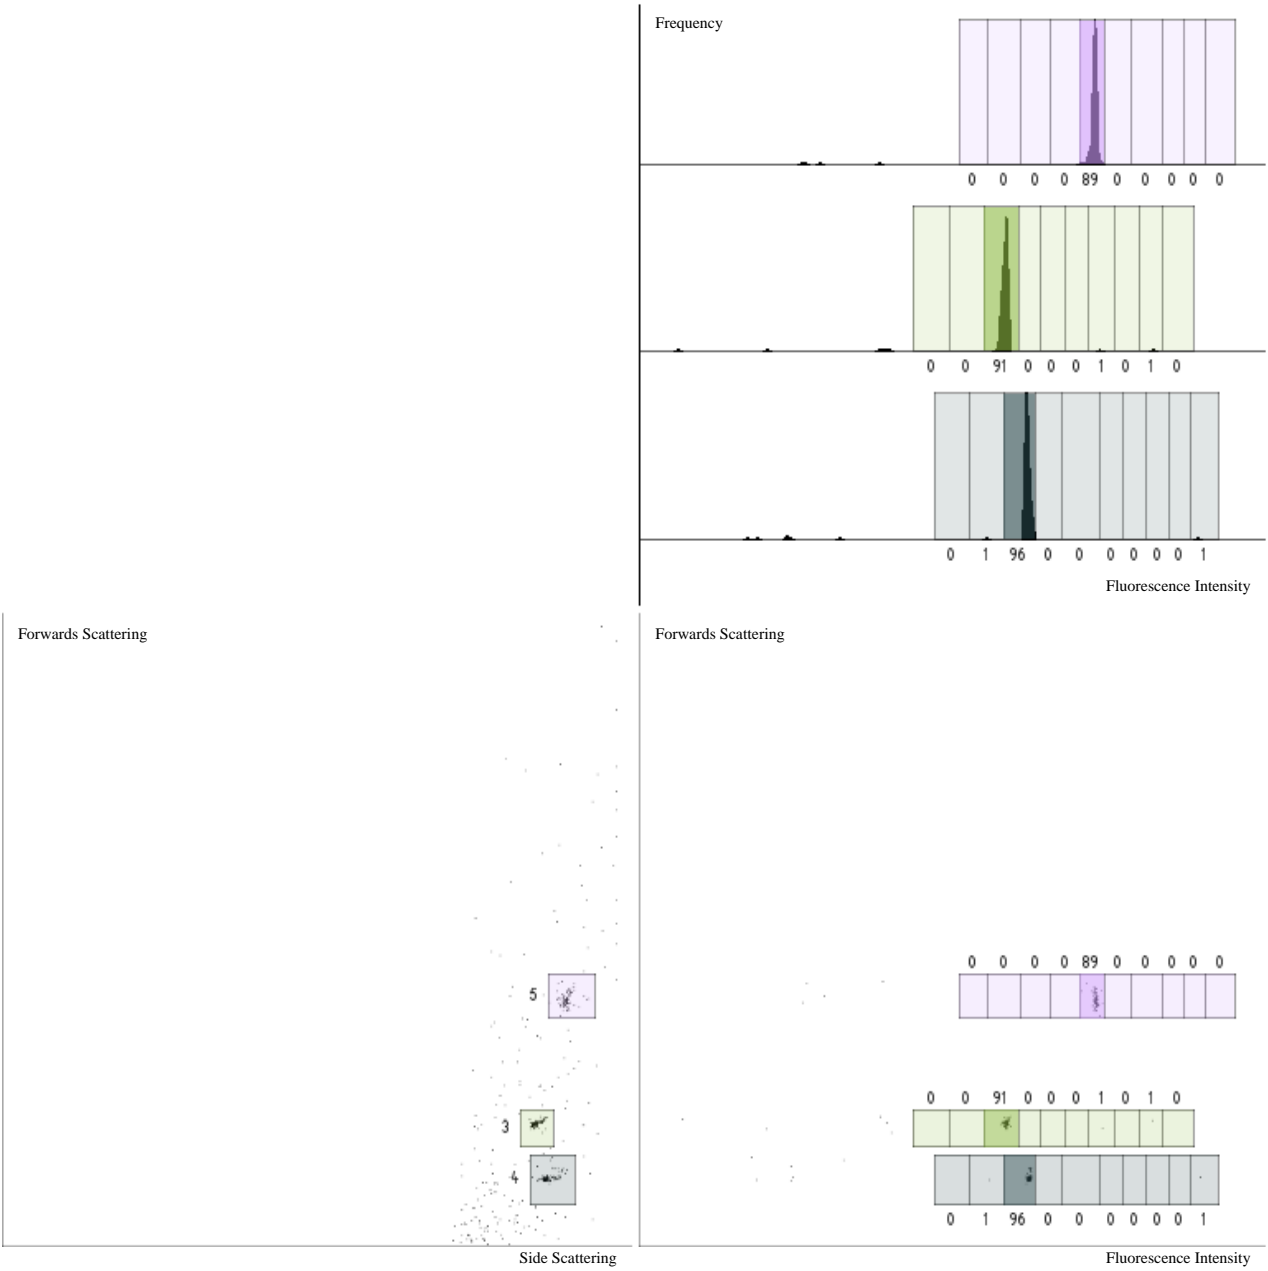

ANNEX 3: TAG DECONVOLUTION - BEAD 254

Passes flow sorting criteria: Yes  
Passes tag deconvolution criteria: No  
Included in protocol analysis: No  
Protocol: N/A  
Filename: Bin2\_plateA2\_F12.fcs  
Split 1: Petrol shading  
Split 2: Green shading  
Split 3: Violet shading

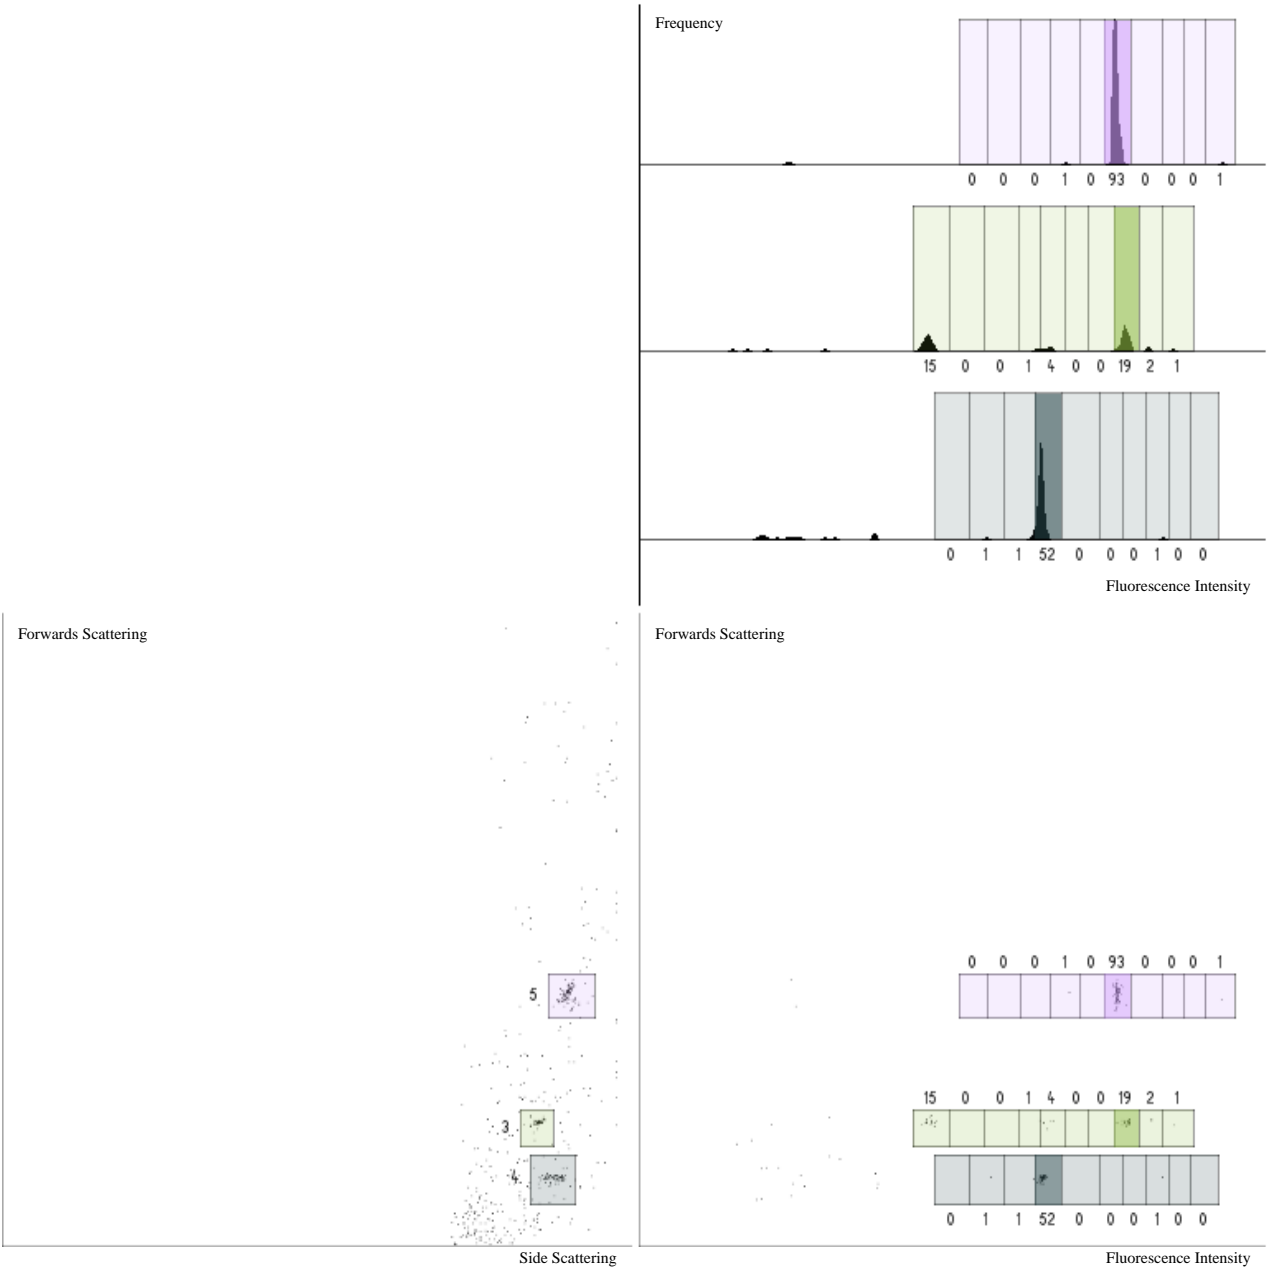



ANNEX 3: TAG DECONVOLUTION - BEAD 255

Passes flow sorting criteria: Yes  
Passes tag deconvolution criteria: Yes  
Included in protocol analysis: Yes  
Protocol: 2, 3, 1, 2  
Filename: Bin2\_plateA2\_G1.fcs  
Split 1: Petrol shading  
Split 2: Green shading  
Split 3: Violet shading

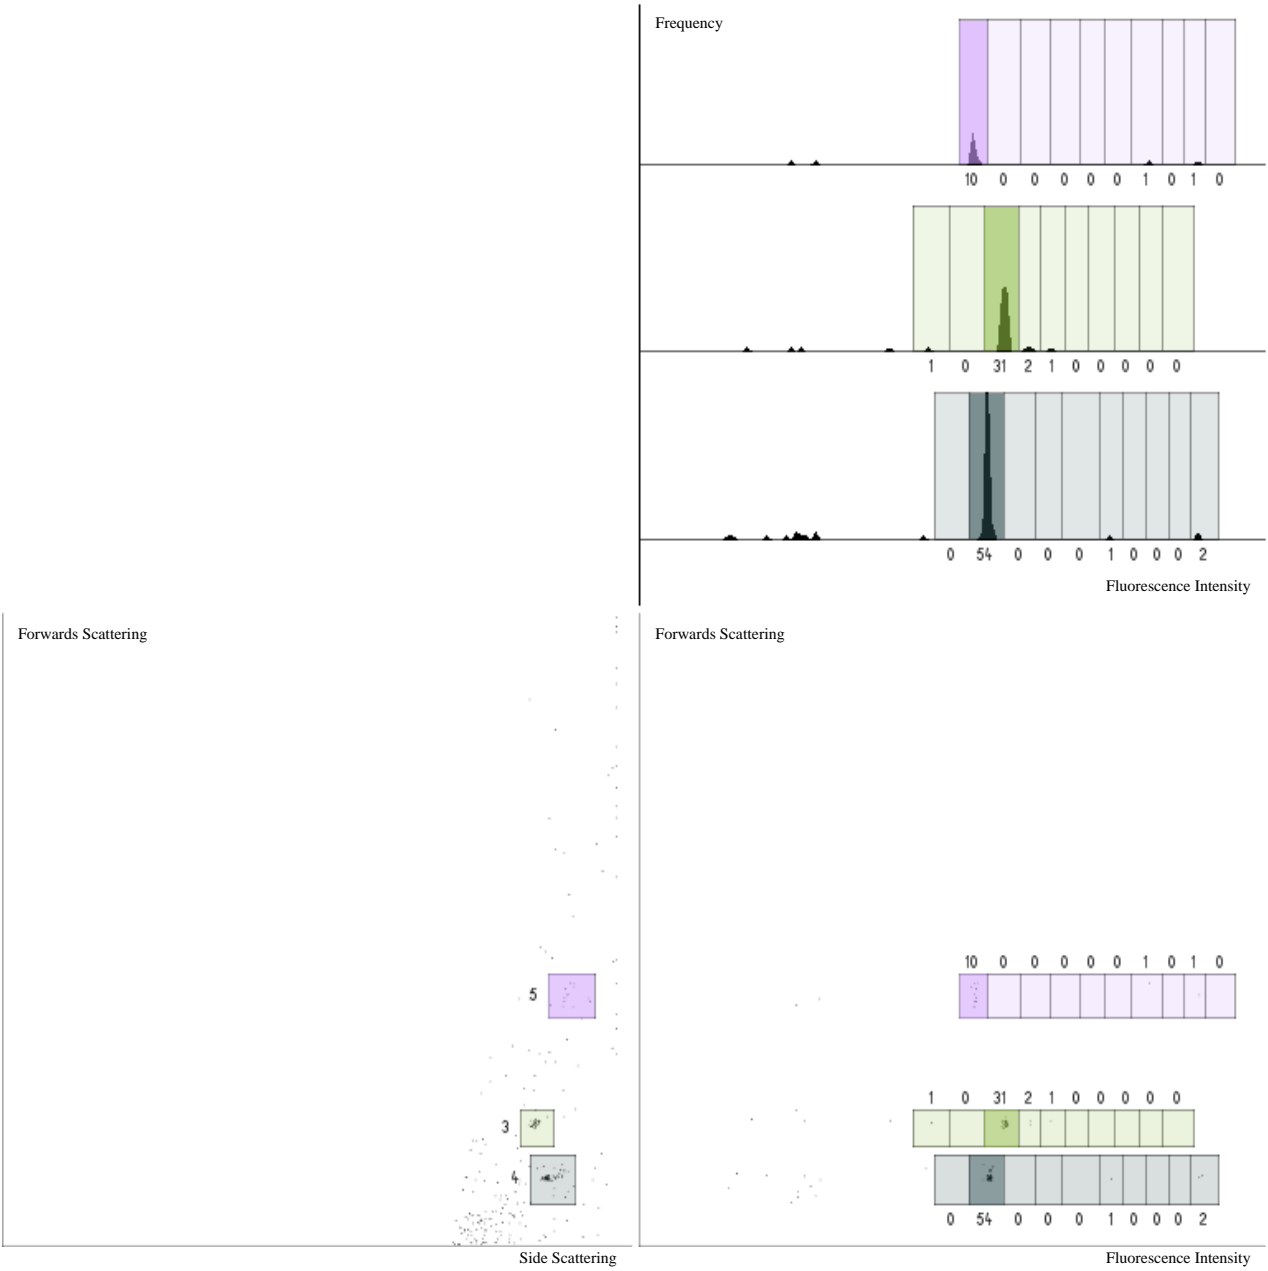

ANNEX 3: TAG DECONVOLUTION - BEAD 256

Passes flow sorting criteria: Yes  
Passes tag deconvolution criteria: No  
Included in protocol analysis: No  
Protocol: N/A  
Filename: Bin2\_plateA2\_G4.fcs  
Split 1: Petrol shading  
Split 2: Green shading  
Split 3: Violet shading

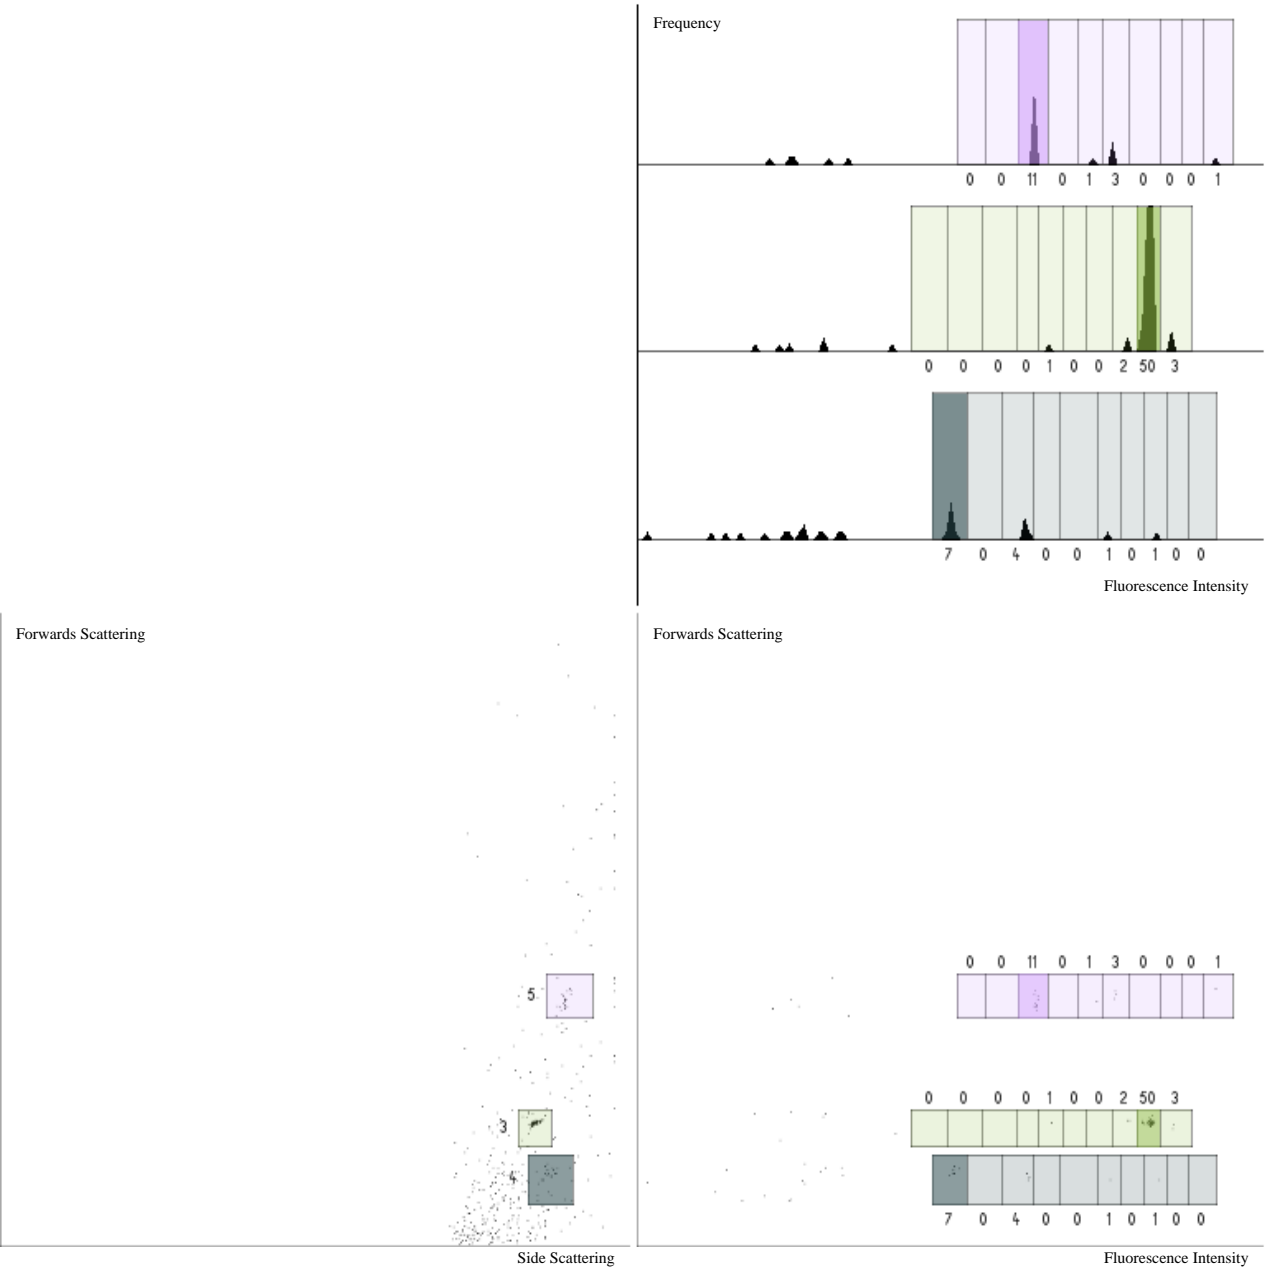

ANNEX 3: TAG DECONVOLUTION - BEAD 257

Passes flow sorting criteria: Yes  
Passes tag deconvolution criteria: No  
Included in protocol analysis: No  
Protocol: N/A  
Filename: Bin2\_plateA2\_G5.fcs  
Split 1: Petrol shading  
Split 2: Green shading  
Split 3: Violet shading

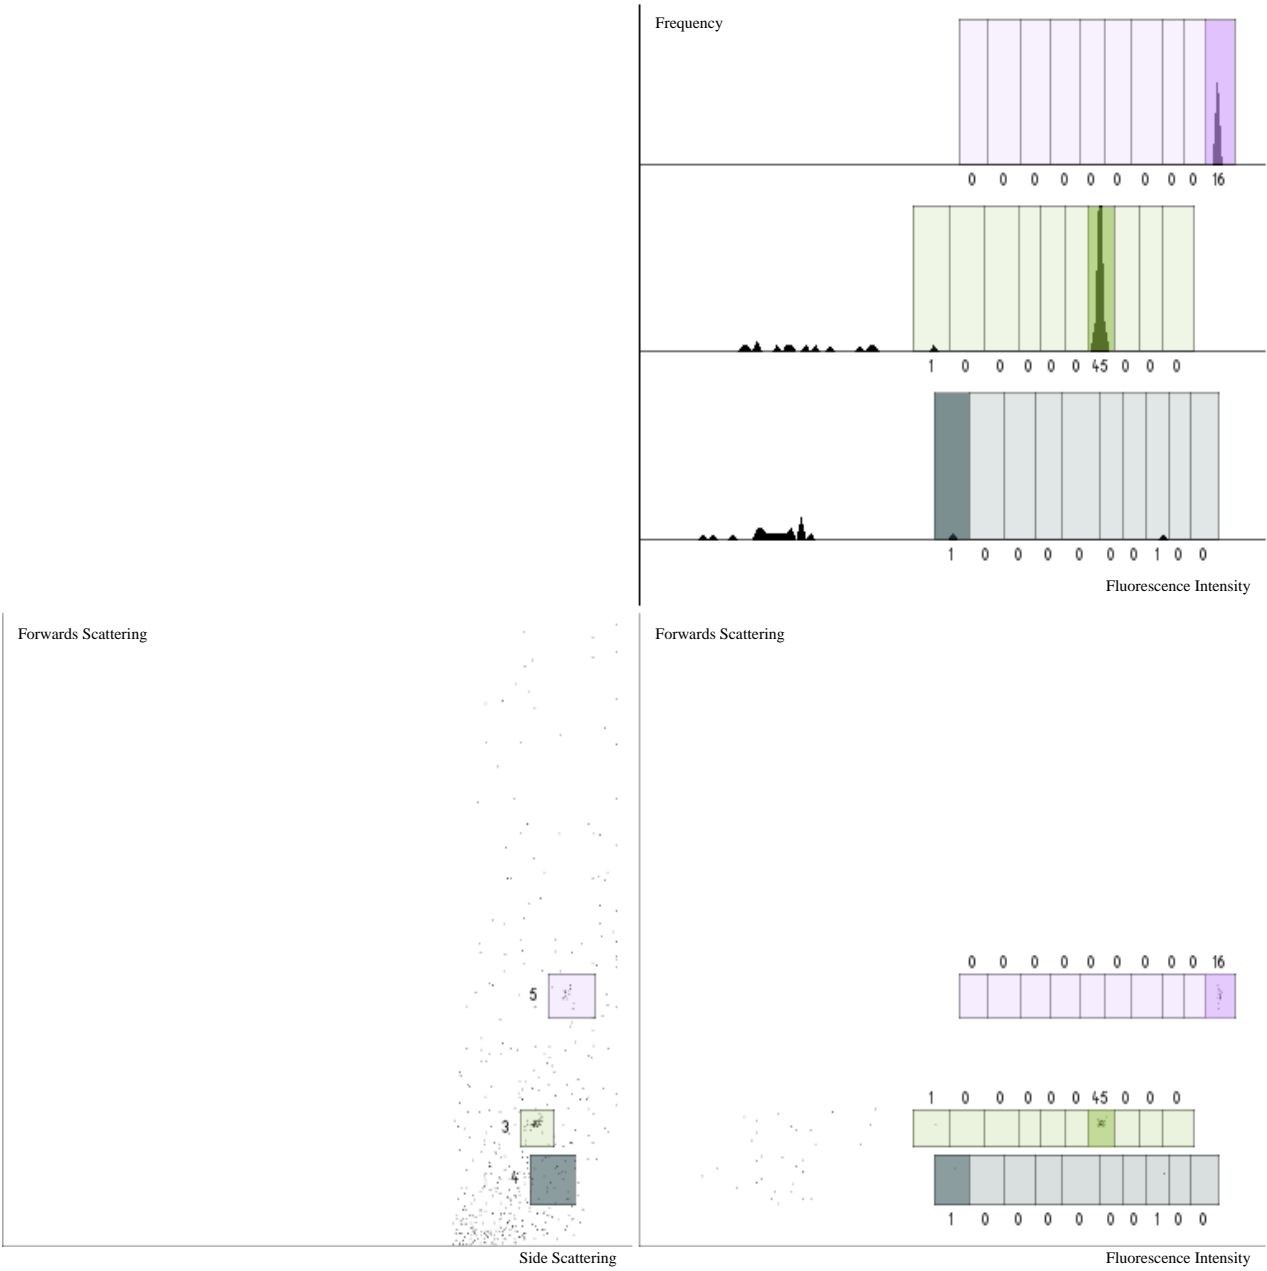

ANNEX 3: TAG DECONVOLUTION - BEAD 258

Passes flow sorting criteria: Yes  
Passes tag deconvolution criteria: Yes  
Included in protocol analysis: Yes  
Protocol: 5, 5, 3, 2  
Filename: Bin2\_plateA2\_G6.fcs  
Split 1: Petrol shading  
Split 2: Green shading  
Split 3: Violet shading

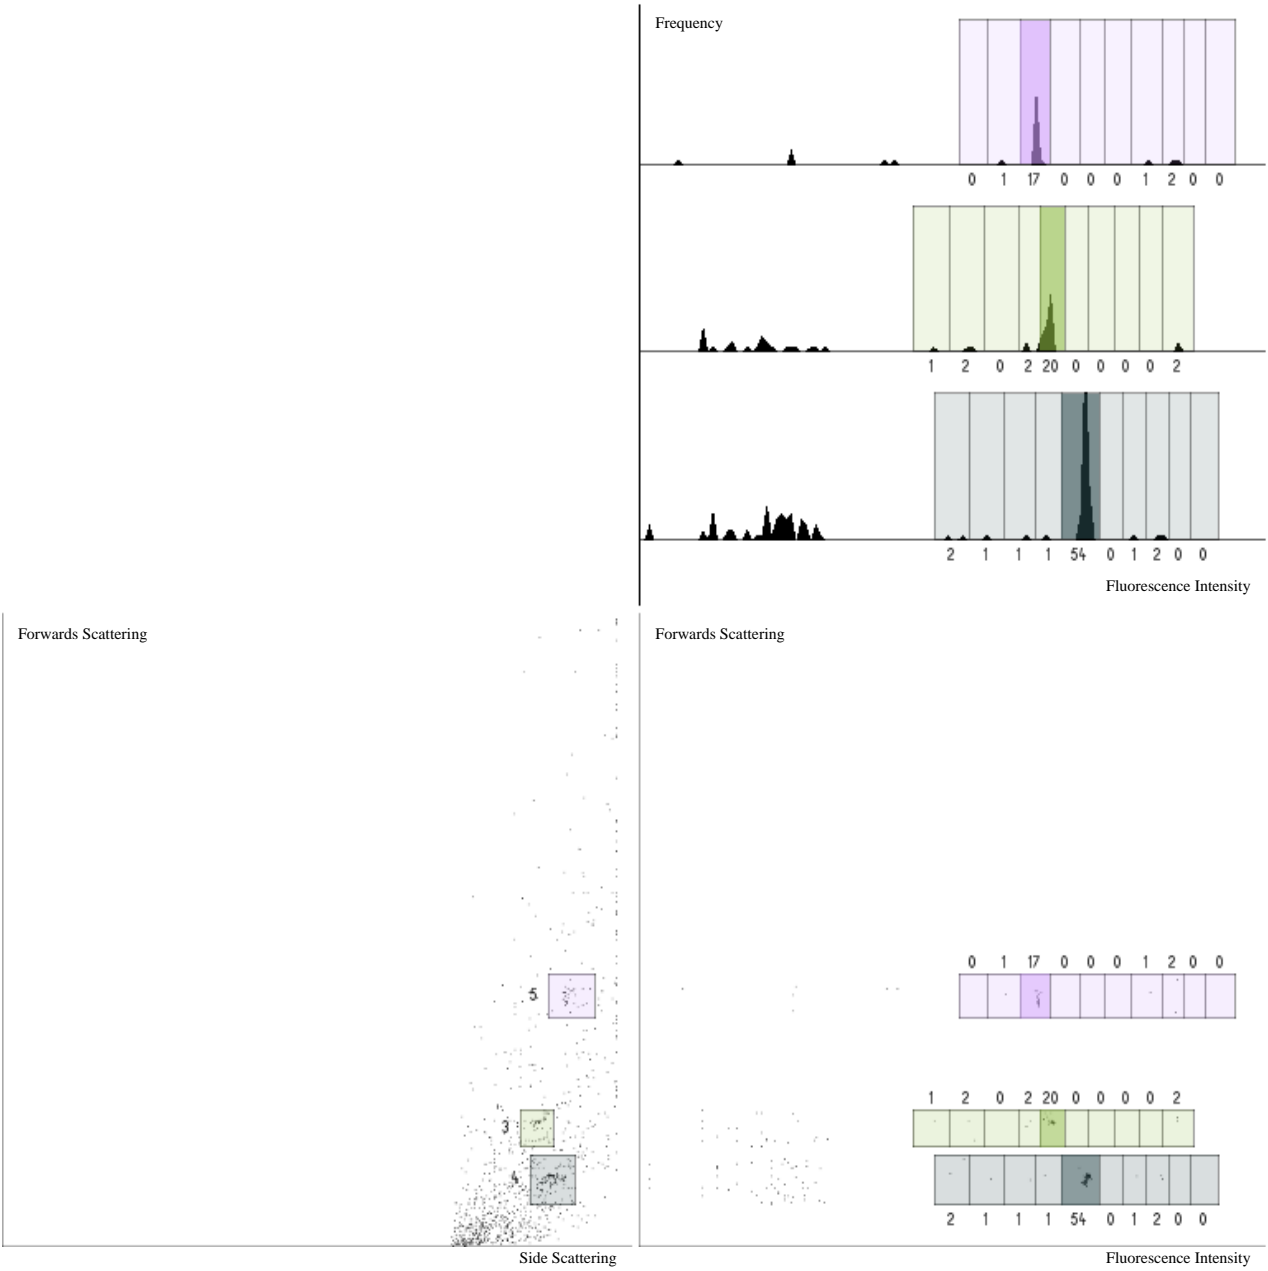

ANNEX 3: TAG DECONVOLUTION - BEAD 259

Passes flow sorting criteria: Yes  
Passes tag deconvolution criteria: Yes  
Included in protocol analysis: Yes  
Protocol: 2, 10, 5, 2  
Filename: Bin2\_plateA2\_G7.fcs  
Split 1: Petrol shading  
Split 2: Green shading  
Split 3: Violet shading

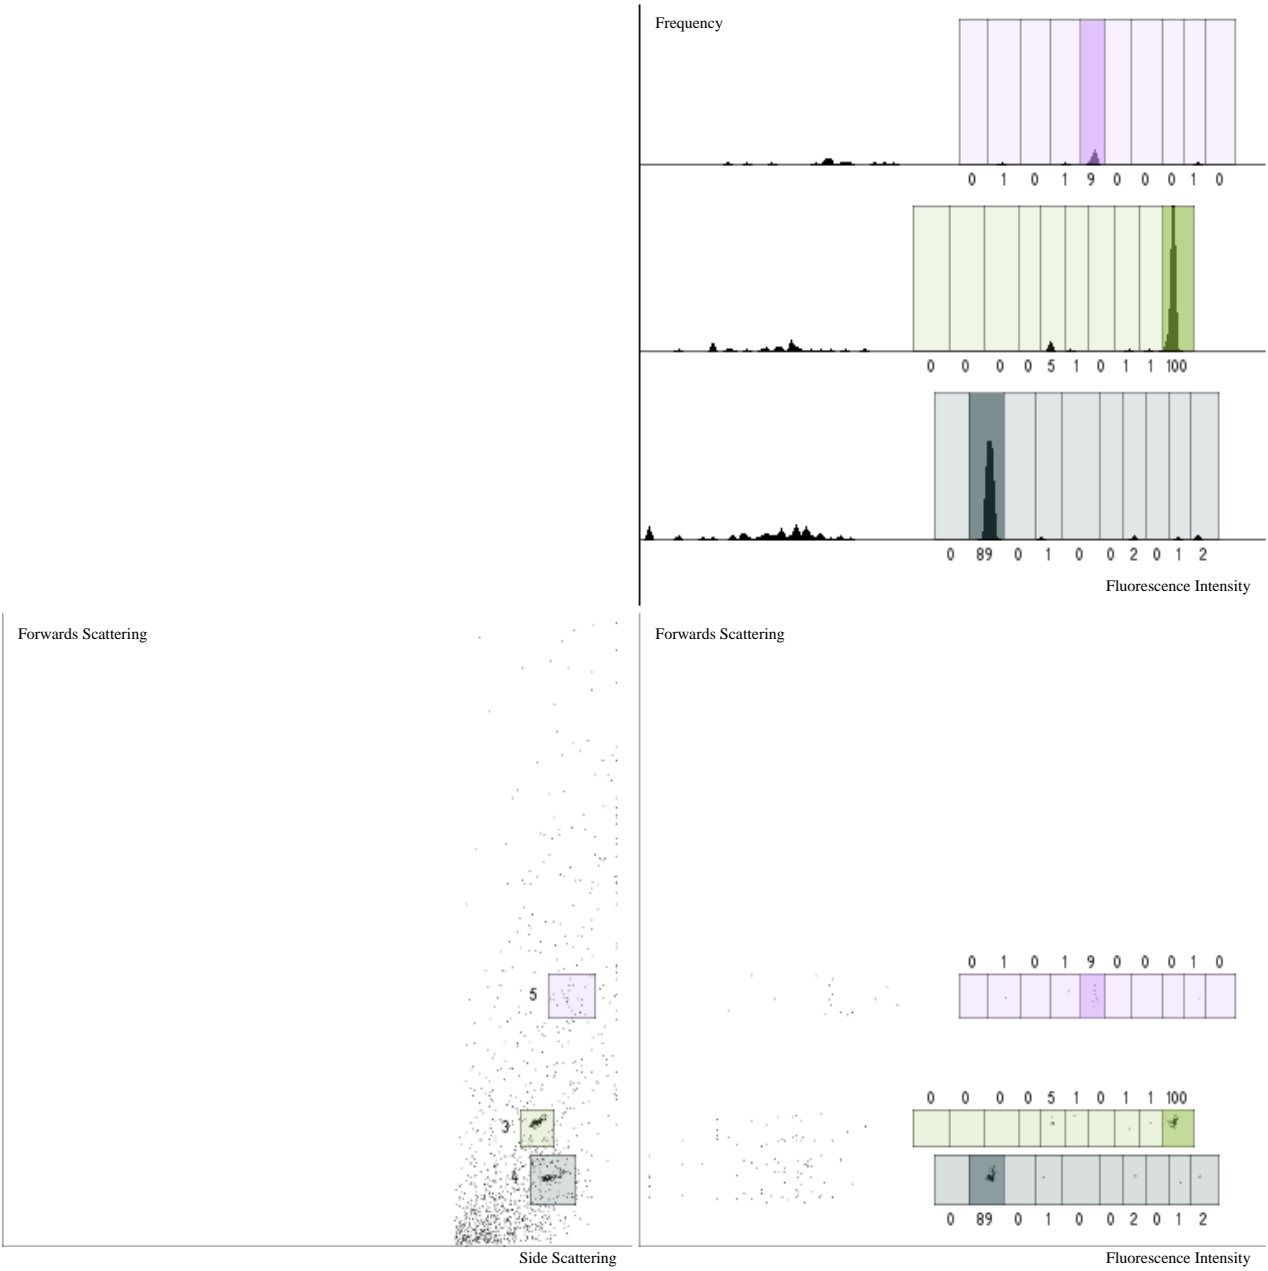

ANNEX 3: TAG DECONVOLUTION - BEAD 260

Passes flow sorting criteria: Yes  
Passes tag deconvolution criteria: Yes  
Included in protocol analysis: Yes  
Protocol: 3, 5, 8, 3  
Filename: Bin3\_plateA2\_B9.fcs  
Split 1: Petrol shading  
Split 2: Green shading  
Split 3: Violet shading

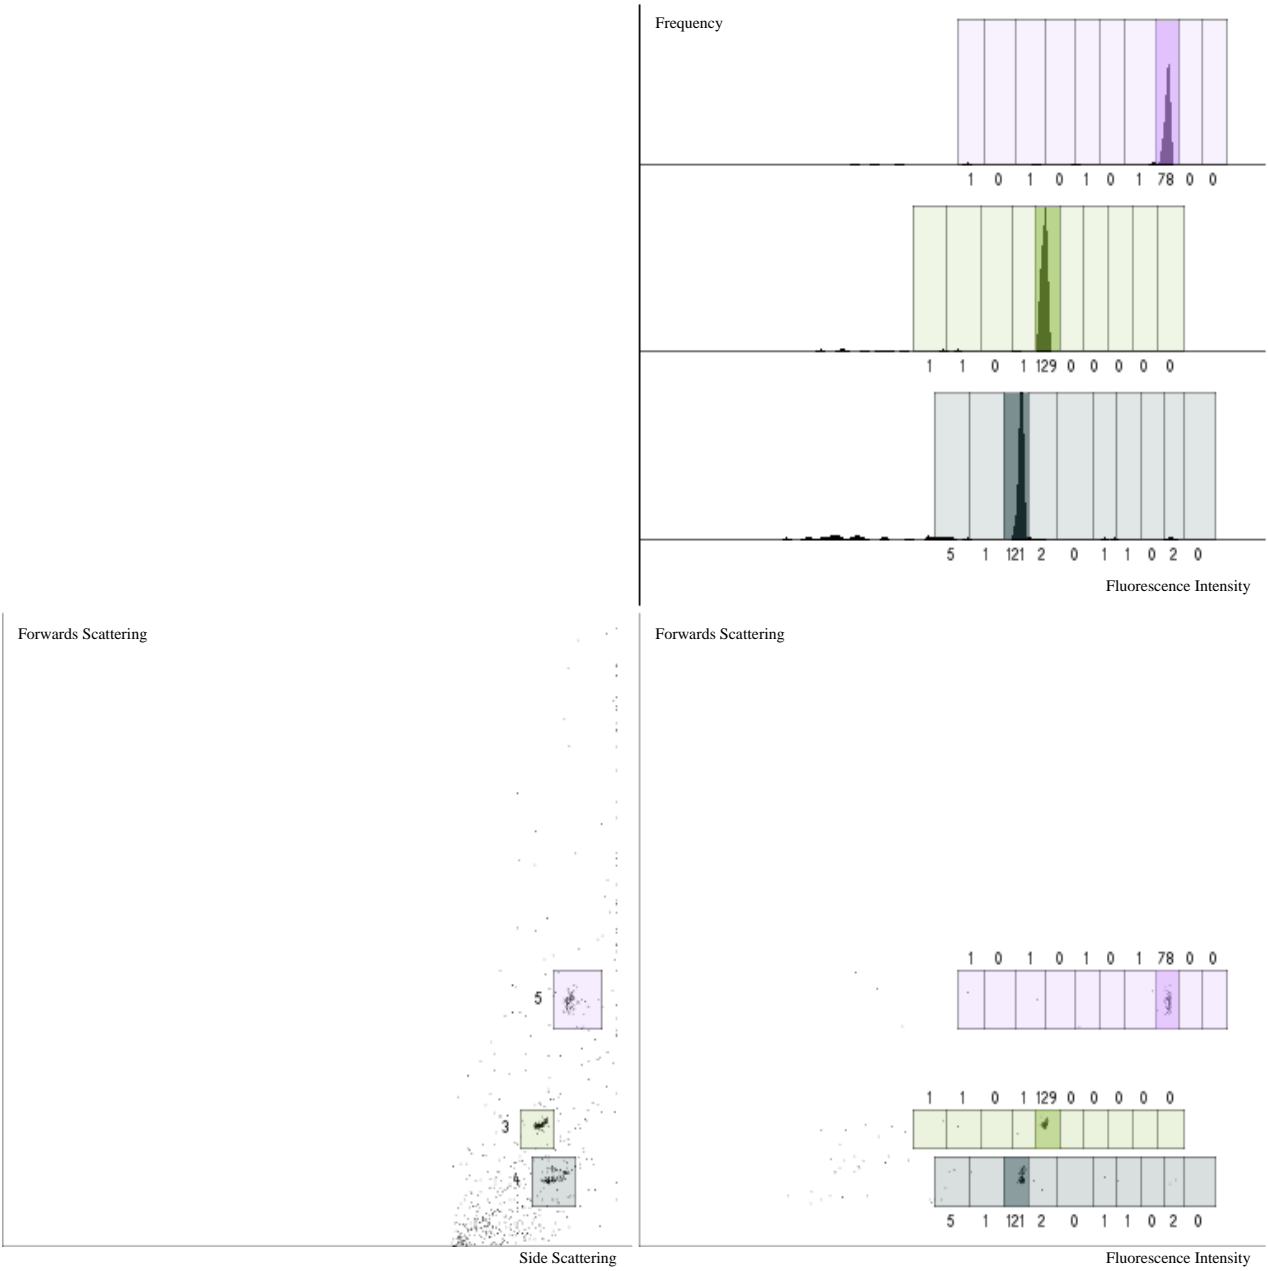

ANNEX 3: TAG DECONVOLUTION - BEAD 261

Passes flow sorting criteria: Yes  
Passes tag deconvolution criteria: Yes  
Included in protocol analysis: Yes  
Protocol: 5, 9, 1, 3  
Filename: Bin3\_plateA2\_A1.fcs  
Split 1: Petrol shading  
Split 2: Green shading  
Split 3: Violet shading

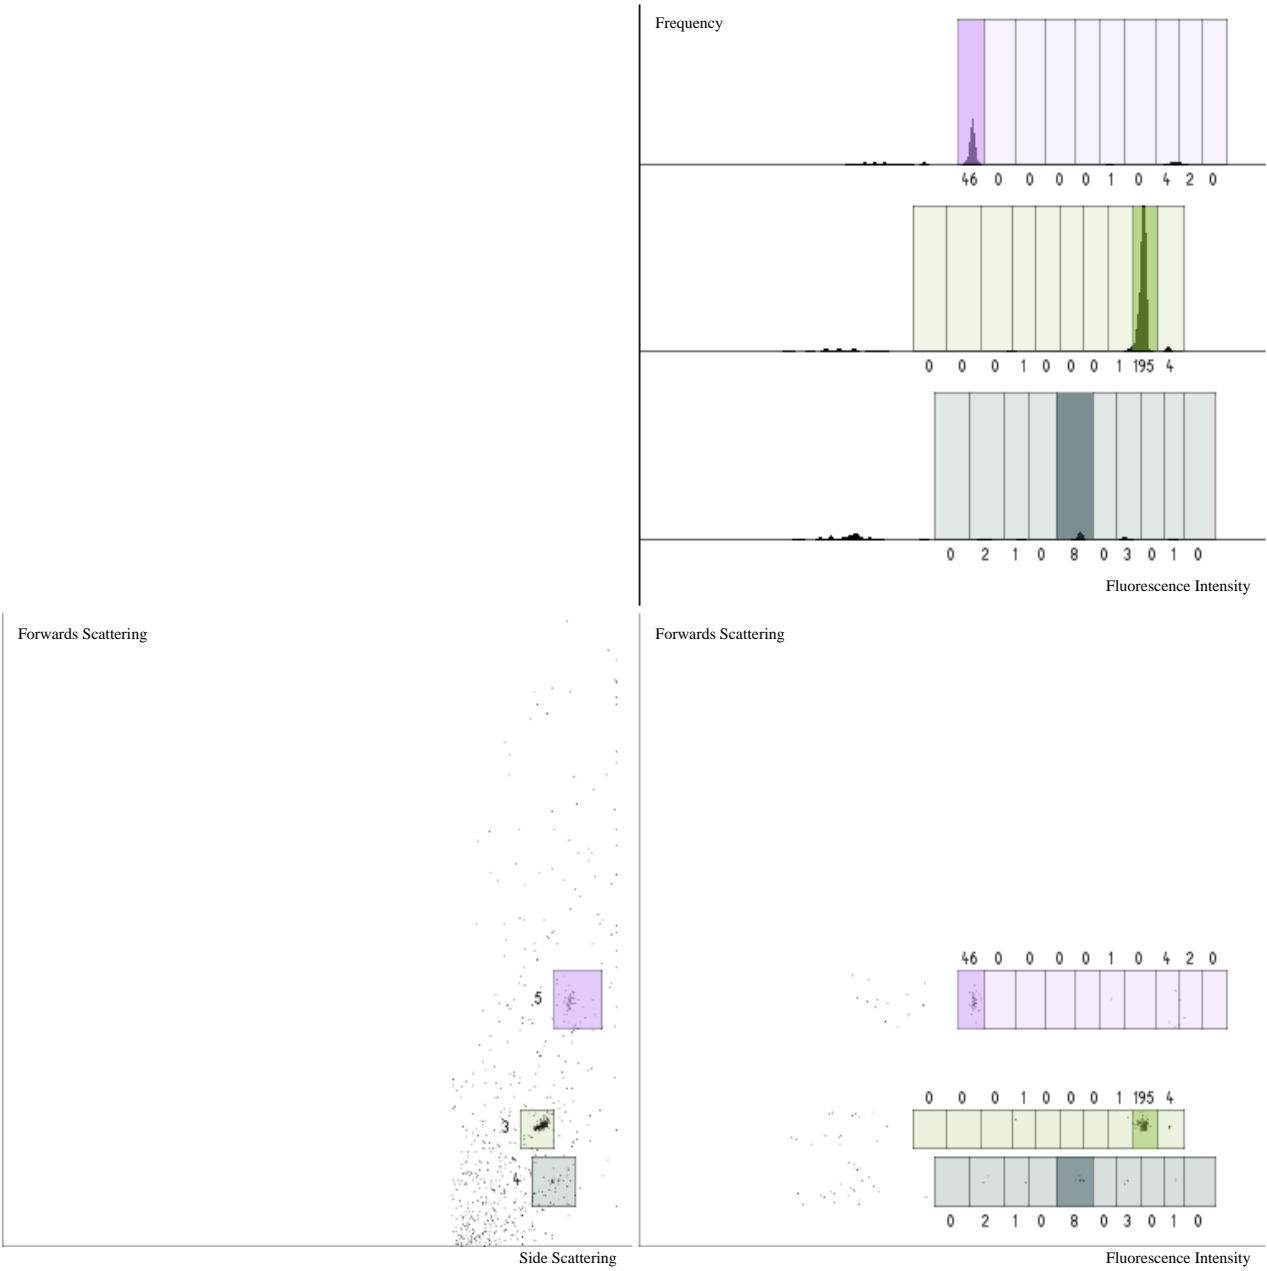

ANNEX 3: TAG DECONVOLUTION - BEAD 262

Passes flow sorting criteria: Yes  
Passes tag deconvolution criteria: Yes  
Included in protocol analysis: Yes  
Protocol: 5, 10, 9, 3  
Filename: Bin3\_plateA2\_A2.fcs  
Split 1: Petrol shading  
Split 2: Green shading  
Split 3: Violet shading

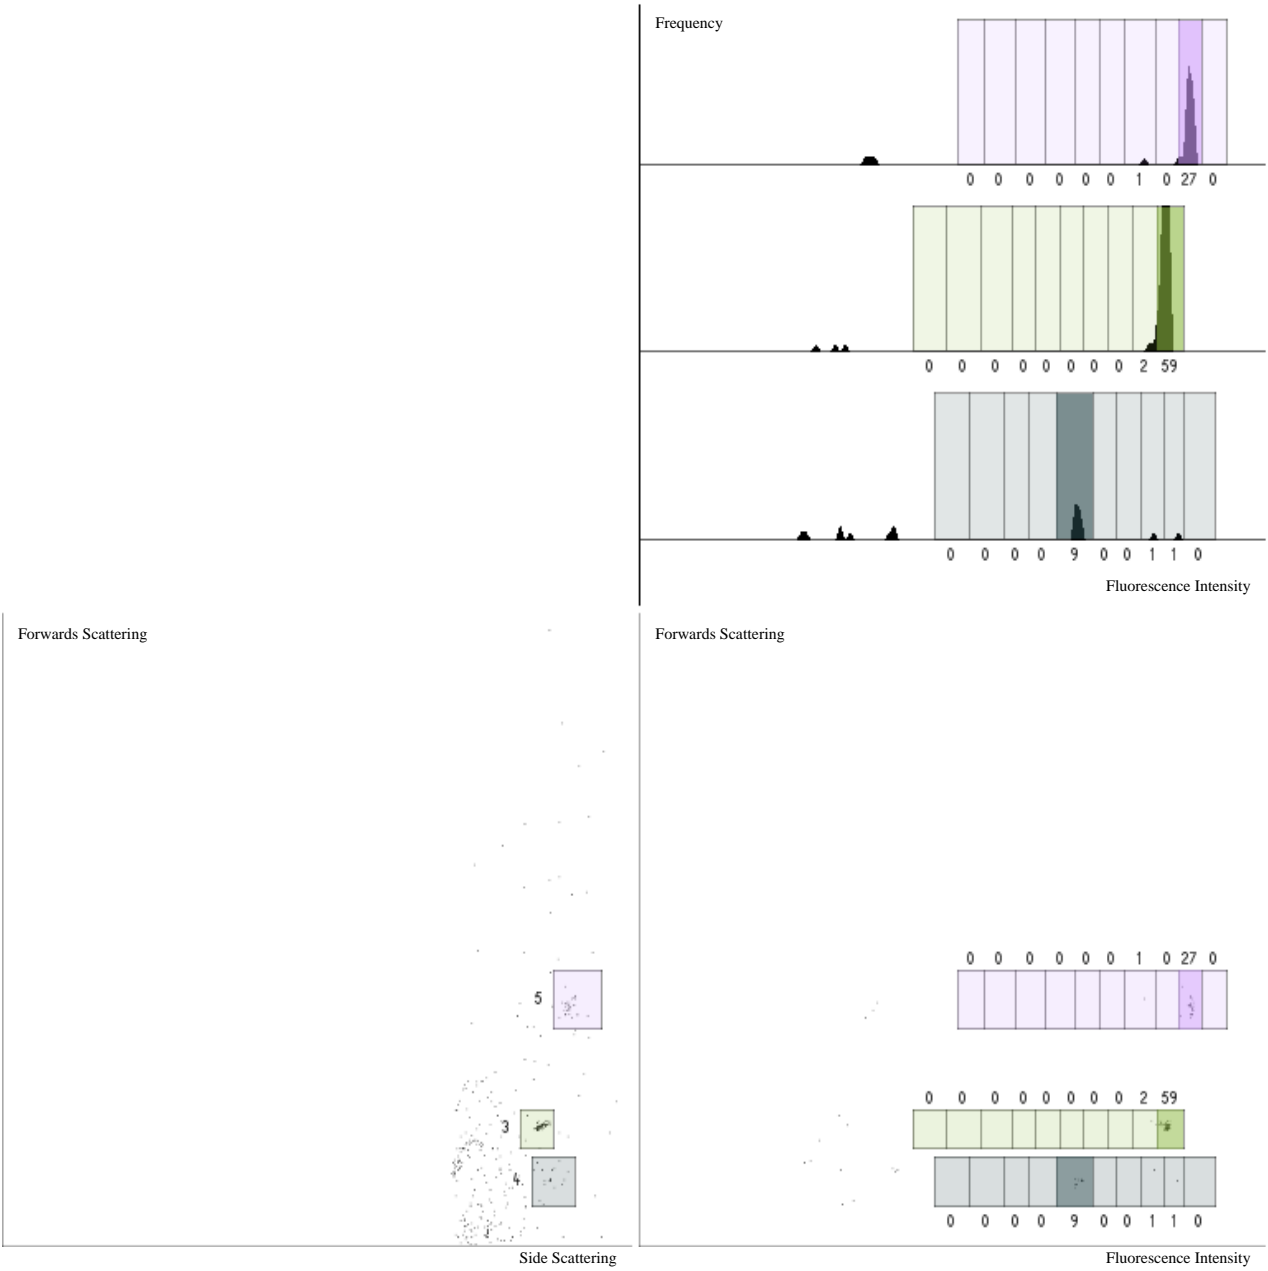



ANNEX 3: TAG DECONVOLUTION - BEAD 263

Passes flow sorting criteria: Yes  
Passes tag deconvolution criteria: Yes  
Included in protocol analysis: Yes  
Protocol: 9, 4, 3, 3  
Filename: Bin3\_plateA2\_A3.fcs  
Split 1: Petrol shading  
Split 2: Green shading  
Split 3: Violet shading

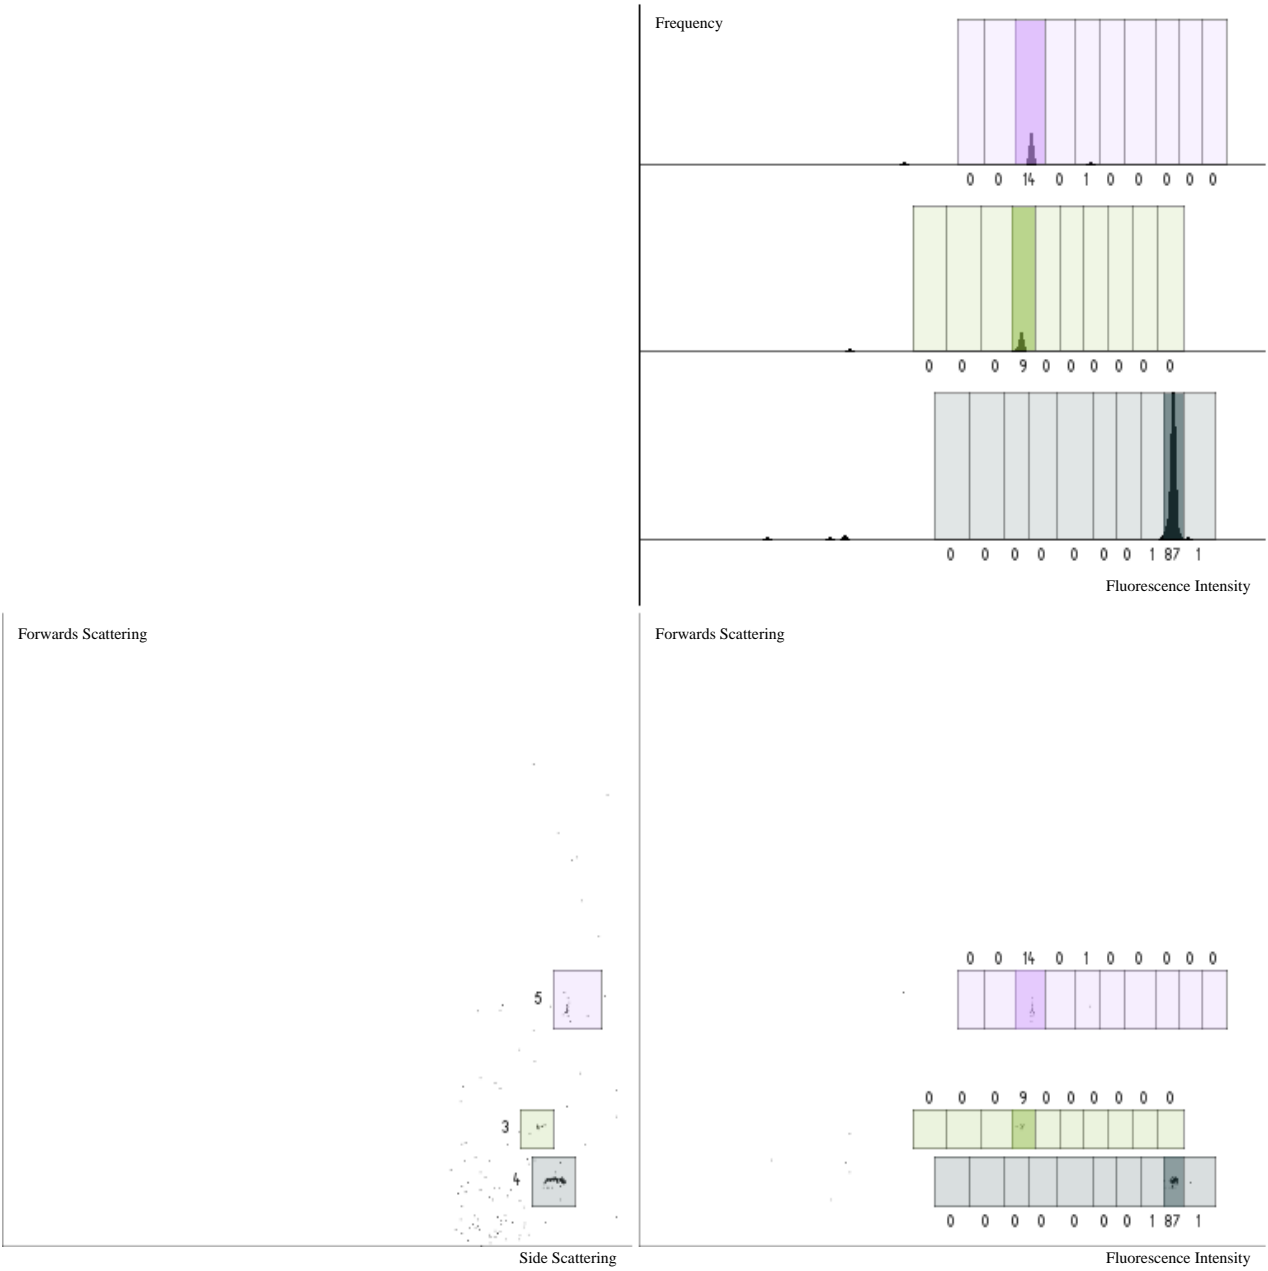

ANNEX 3: TAG DECONVOLUTION - BEAD 264

Passes flow sorting criteria: Yes  
Passes tag deconvolution criteria: Yes  
Included in protocol analysis: Yes  
Protocol: 9, 5, 7, 3  
Filename: Bin3\_plateA2\_A4.fcs  
Split 1: Petrol shading  
Split 2: Green shading  
Split 3: Violet shading

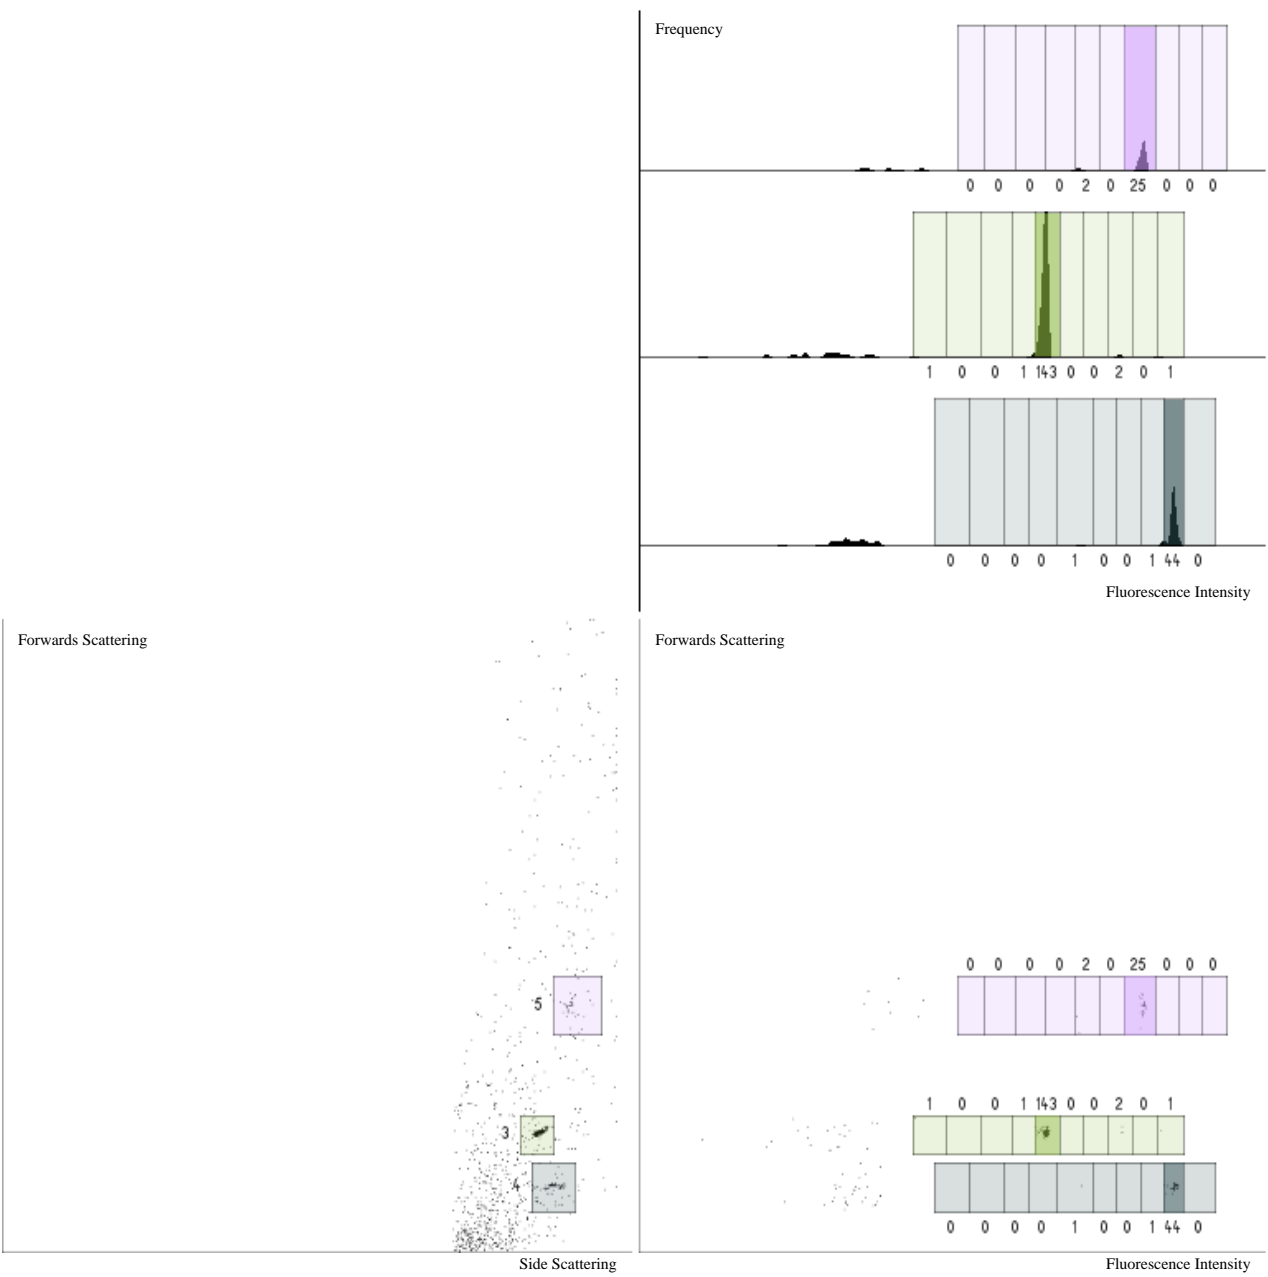

ANNEX 3: TAG DECONVOLUTION - BEAD 265

Passes flow sorting criteria: Yes  
Passes tag deconvolution criteria: Yes  
Included in protocol analysis: Yes  
Protocol: 8, 6, 10, 3  
Filename: Bin3\_plateA2\_A5.fcs  
Split 1: Petrol shading  
Split 2: Green shading  
Split 3: Violet shading

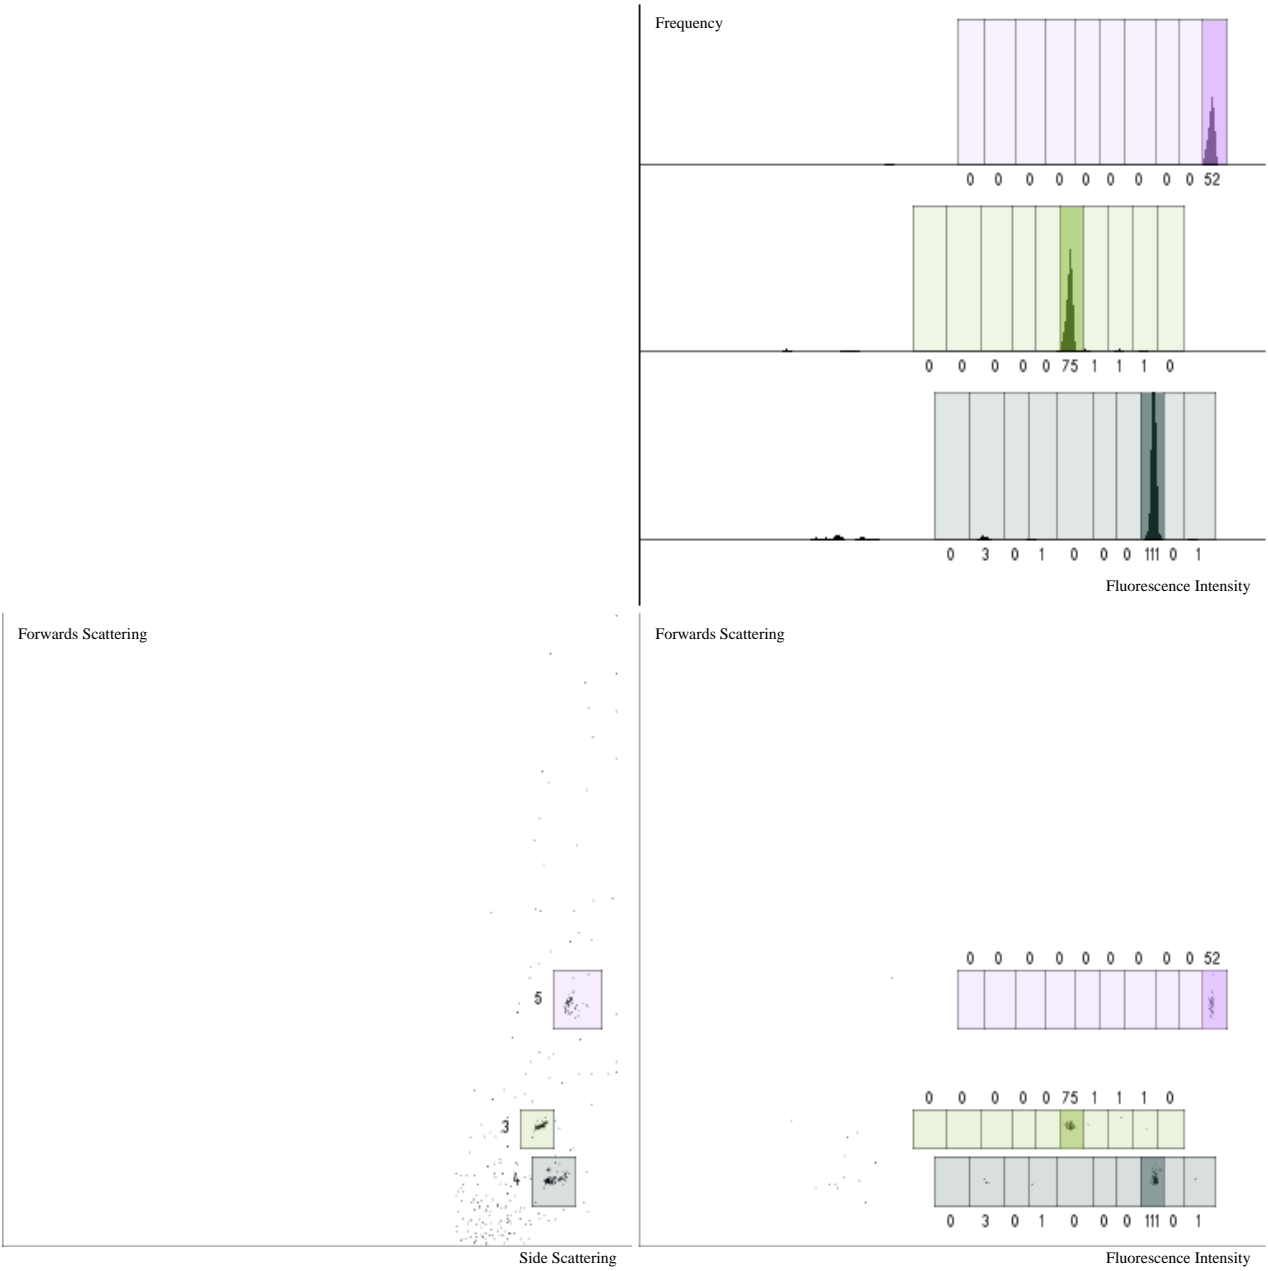

ANNEX 3: TAG DECONVOLUTION - BEAD 266

Passes flow sorting criteria: Yes  
Passes tag deconvolution criteria: Yes  
Included in protocol analysis: Yes  
Protocol: 1, 7, 10, 3  
Filename: Bin3\_plateA2\_A6.fcs  
Split 1: Petrol shading  
Split 2: Green shading  
Split 3: Violet shading

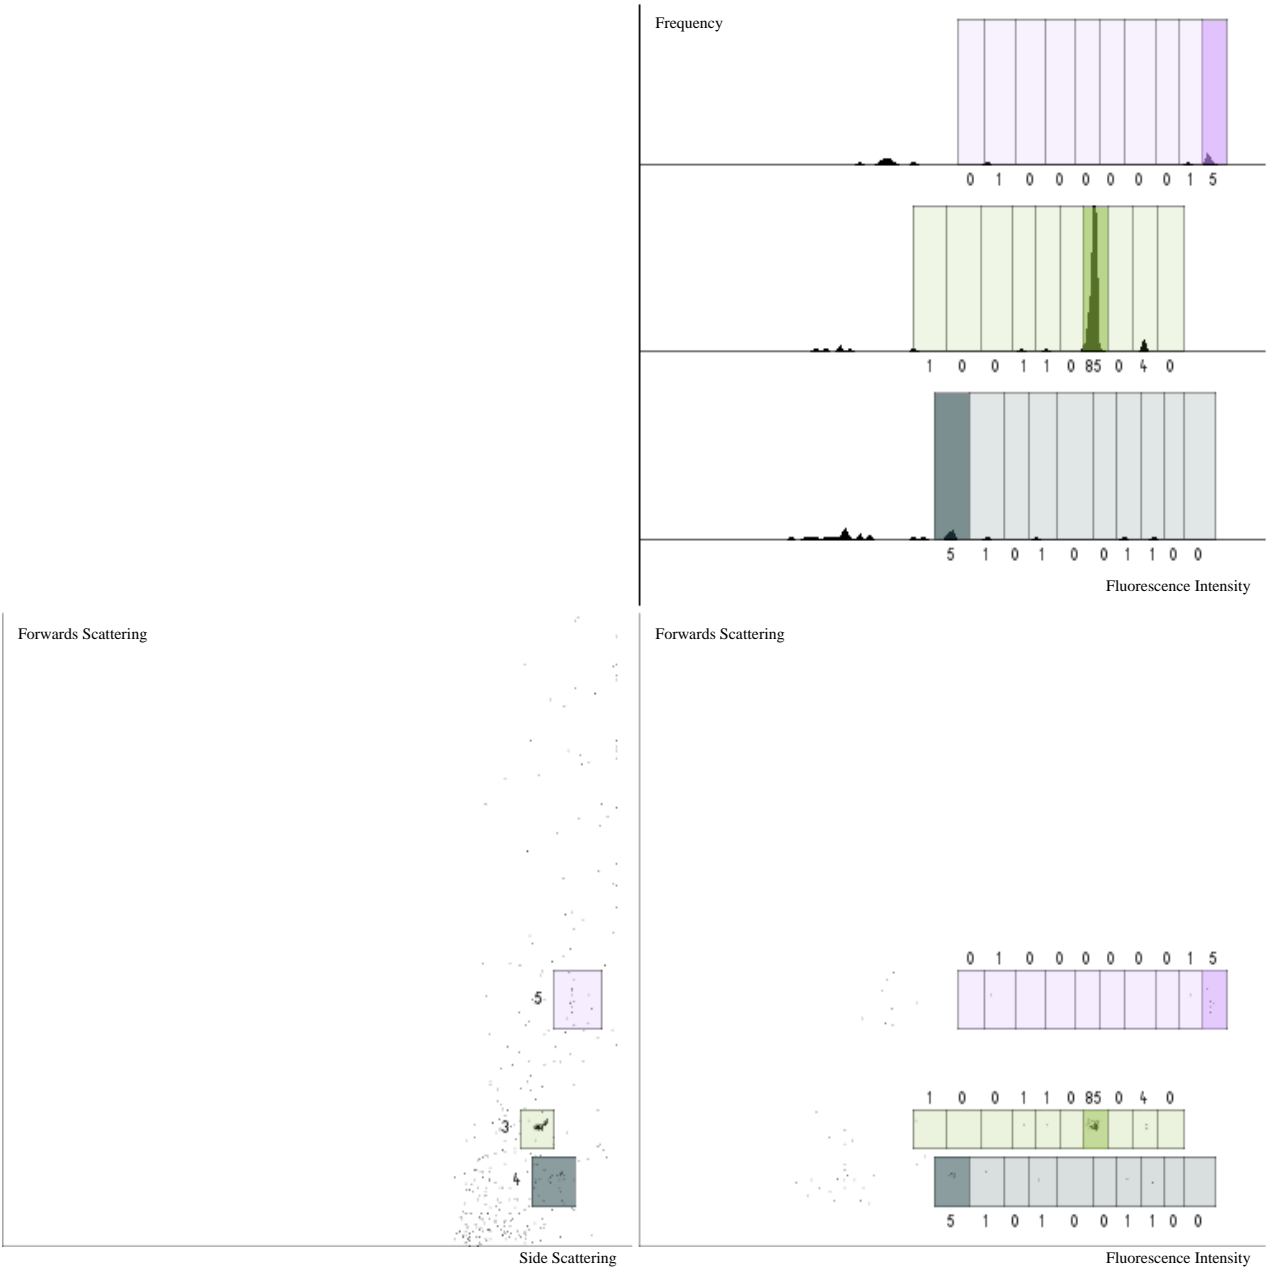

ANNEX 3: TAG DECONVOLUTION - BEAD 267

Passes flow sorting criteria: Yes  
Passes tag deconvolution criteria: Yes  
Included in protocol analysis: Yes  
Protocol: 7, 1, 7, 3  
Filename: Bin3\_plateA2\_A7.fcs  
Split 1: Petrol shading  
Split 2: Green shading  
Split 3: Violet shading

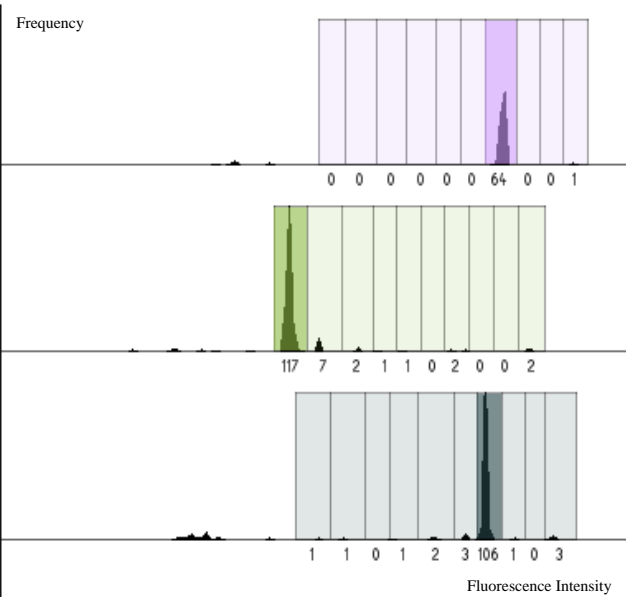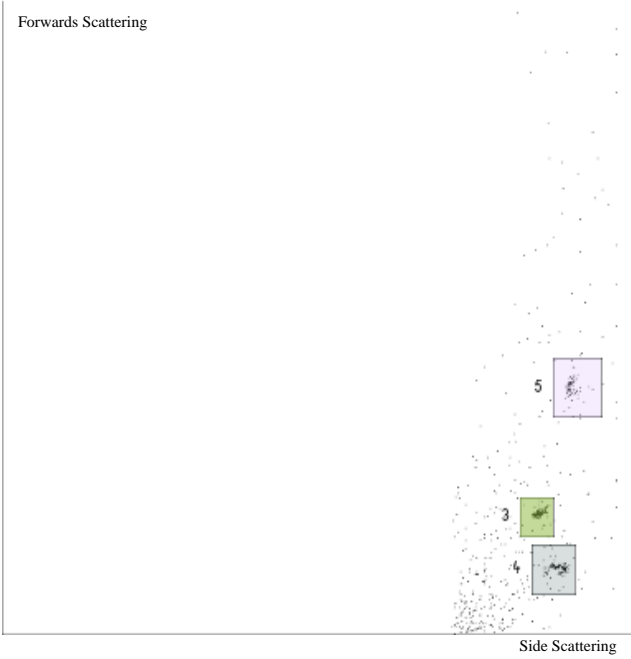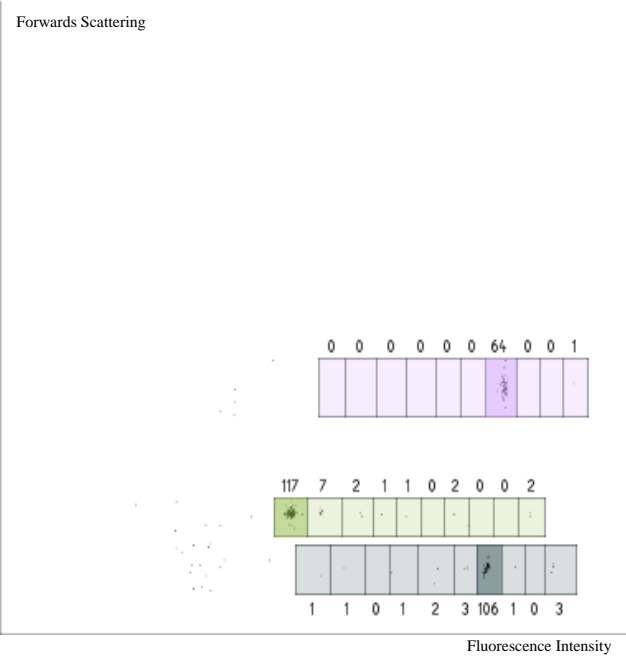

ANNEX 3: TAG DECONVOLUTION - BEAD 268

Passes flow sorting criteria: Yes  
Passes tag deconvolution criteria: Yes  
Included in protocol analysis: Yes  
Protocol: 7, 4, 2, 3  
Filename: Bin3\_plateA2\_A8.fcs  
Split 1: Petrol shading  
Split 2: Green shading  
Split 3: Violet shading

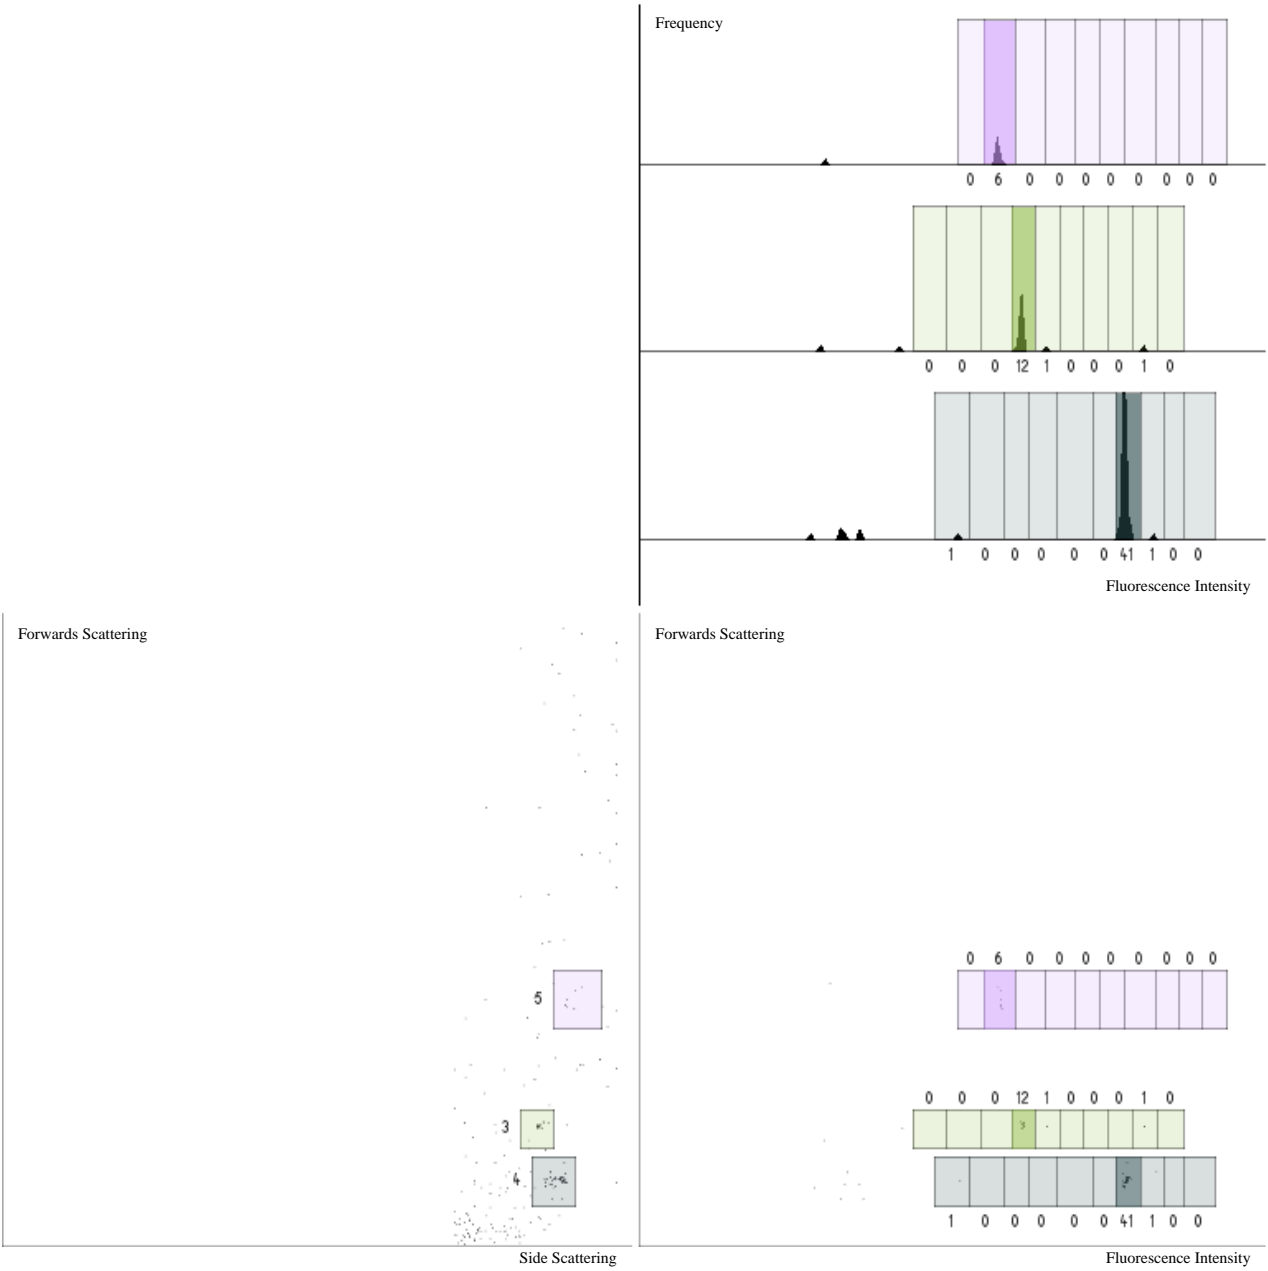

Passes flow sorting criteria: Yes  
 Passes tag deconvolution criteria: No  
 Included in protocol analysis: No  
 Protocol: N/A  
 Filename: Bin3\_plateA2\_A9.fcs  
 Split 1: Petrol shading  
 Split 2: Green shading  
 Split 3: Violet shading

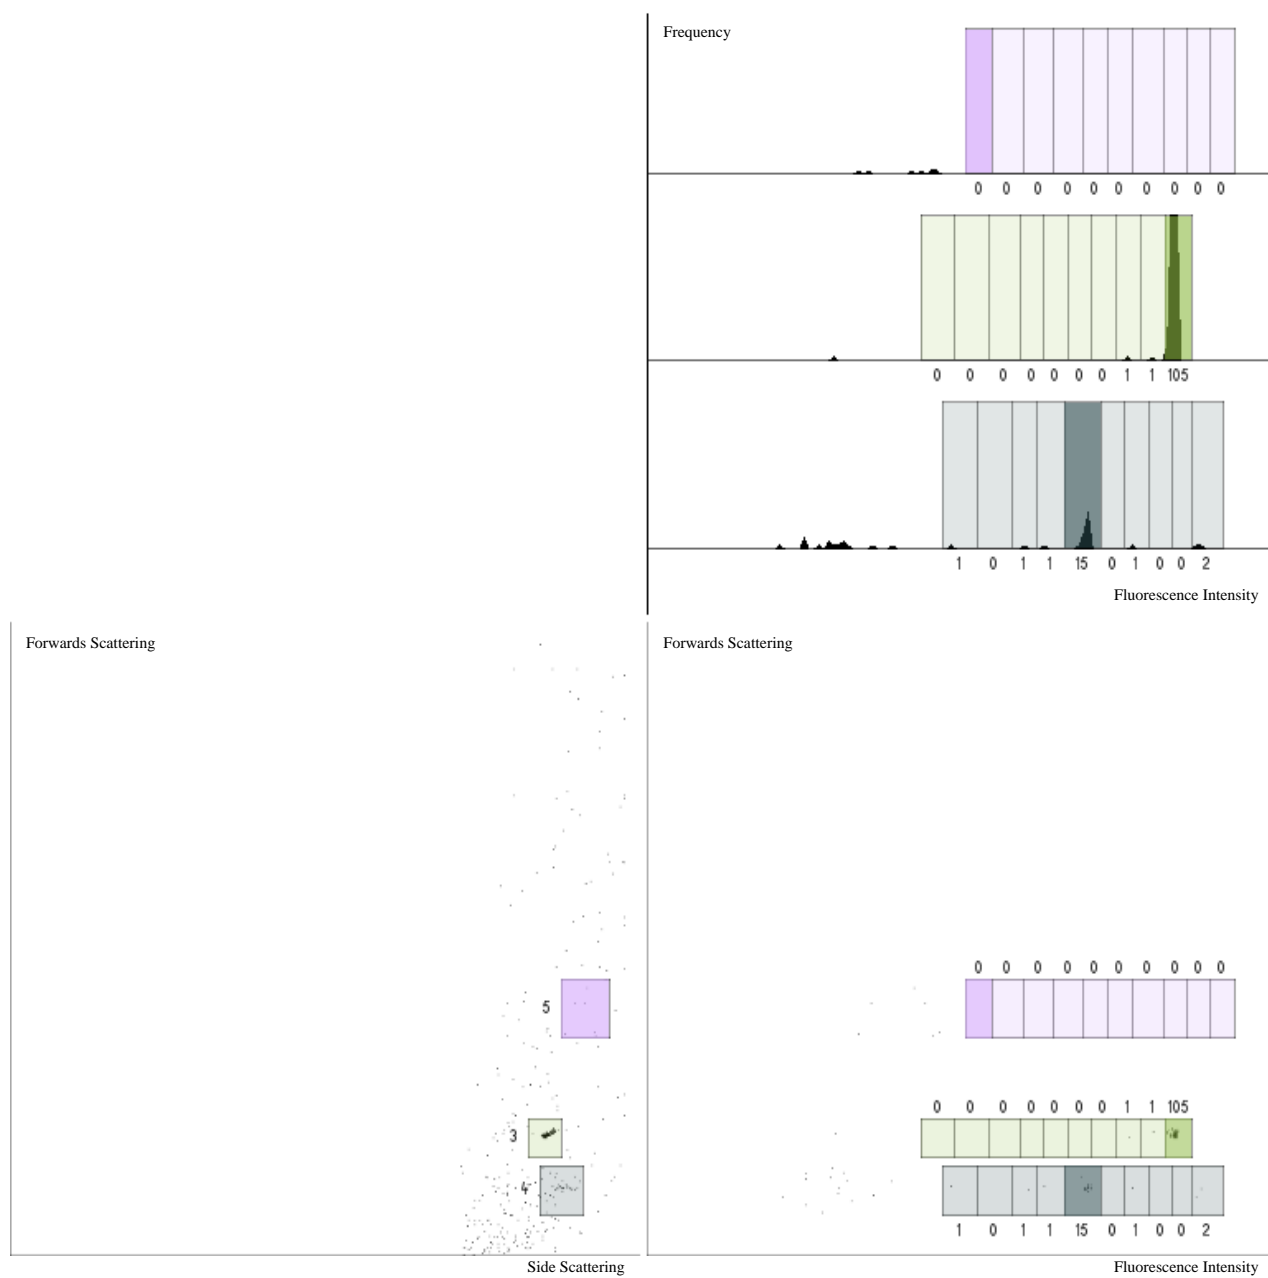

ANNEX 3: TAG DECONVOLUTION - BEAD 270

Passes flow sorting criteria: Yes  
Passes tag deconvolution criteria: Yes  
Included in protocol analysis: Yes  
Protocol: 2, 3, 8, 3  
Filename: Bin3\_plateA2\_A10.fcs  
Split 1: Petrol shading  
Split 2: Green shading  
Split 3: Violet shading

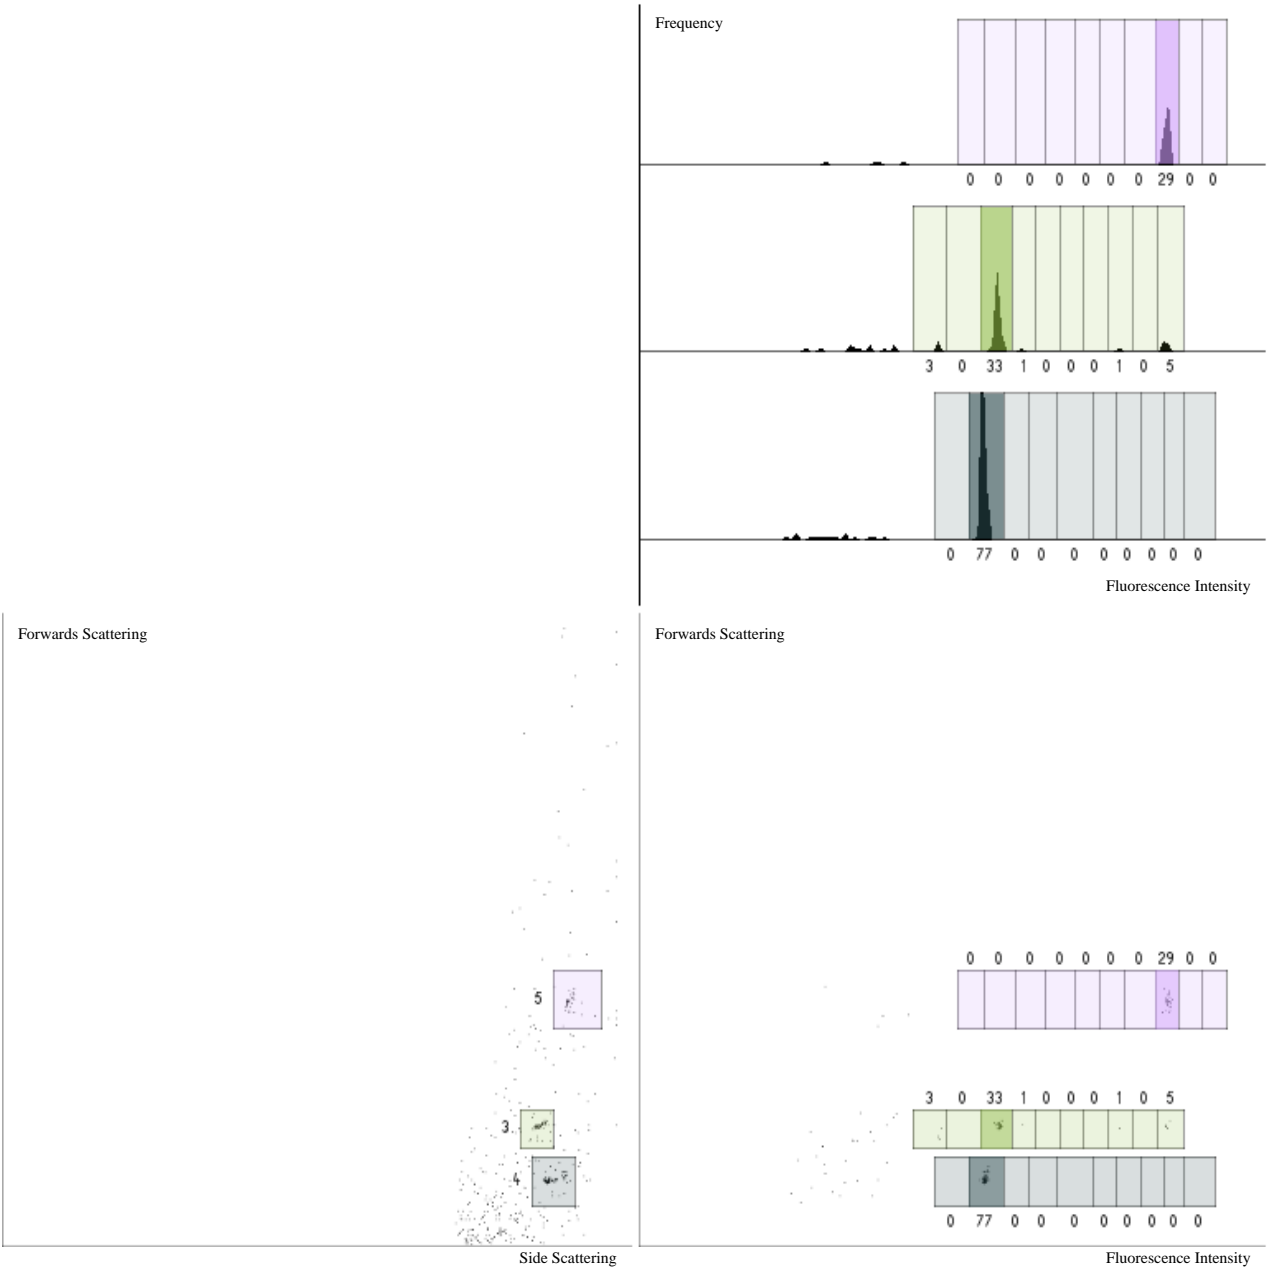



ANNEX 3: TAG DECONVOLUTION - BEAD 271

Passes flow sorting criteria: Yes  
Passes tag deconvolution criteria: Yes  
Included in protocol analysis: Yes  
Protocol: 5, 9, 2, 3  
Filename: Bin3\_plateA2\_A11.fcs  
Split 1: Petrol shading  
Split 2: Green shading  
Split 3: Violet shading

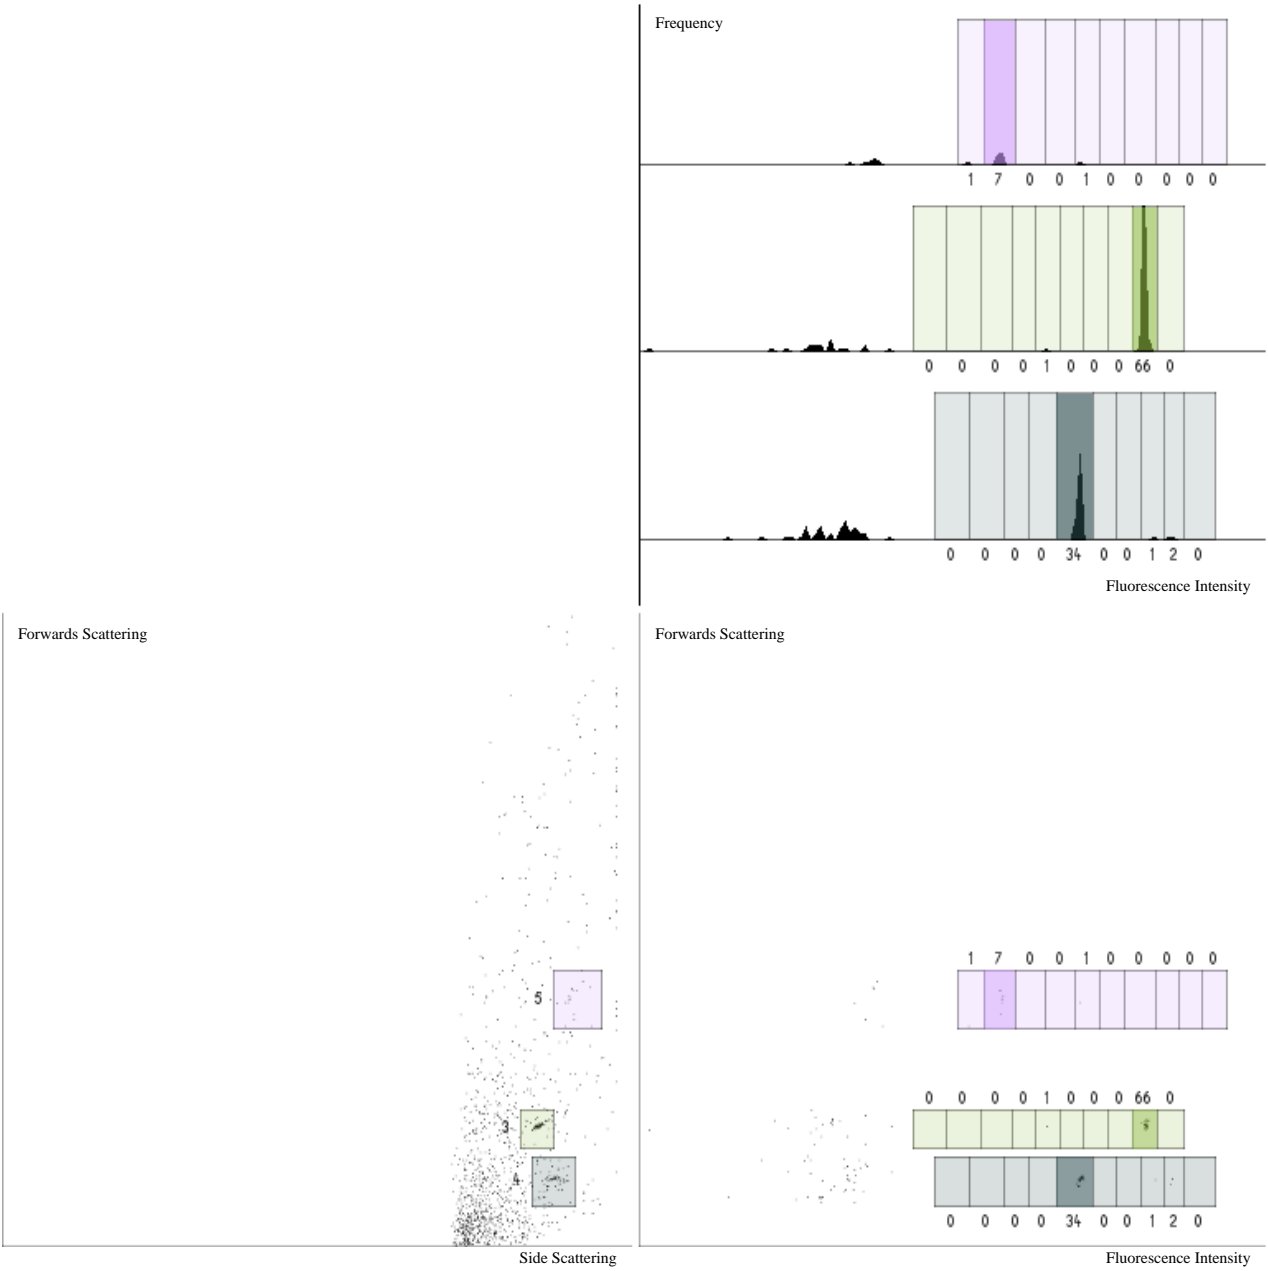

ANNEX 3: TAG DECONVOLUTION - BEAD 272

Passes flow sorting criteria: Yes  
Passes tag deconvolution criteria: Yes  
Included in protocol analysis: Yes  
Protocol: 1, 5, 7, 3  
Filename: Bin3\_plateA2\_A12.fcs  
Split 1: Petrol shading  
Split 2: Green shading  
Split 3: Violet shading

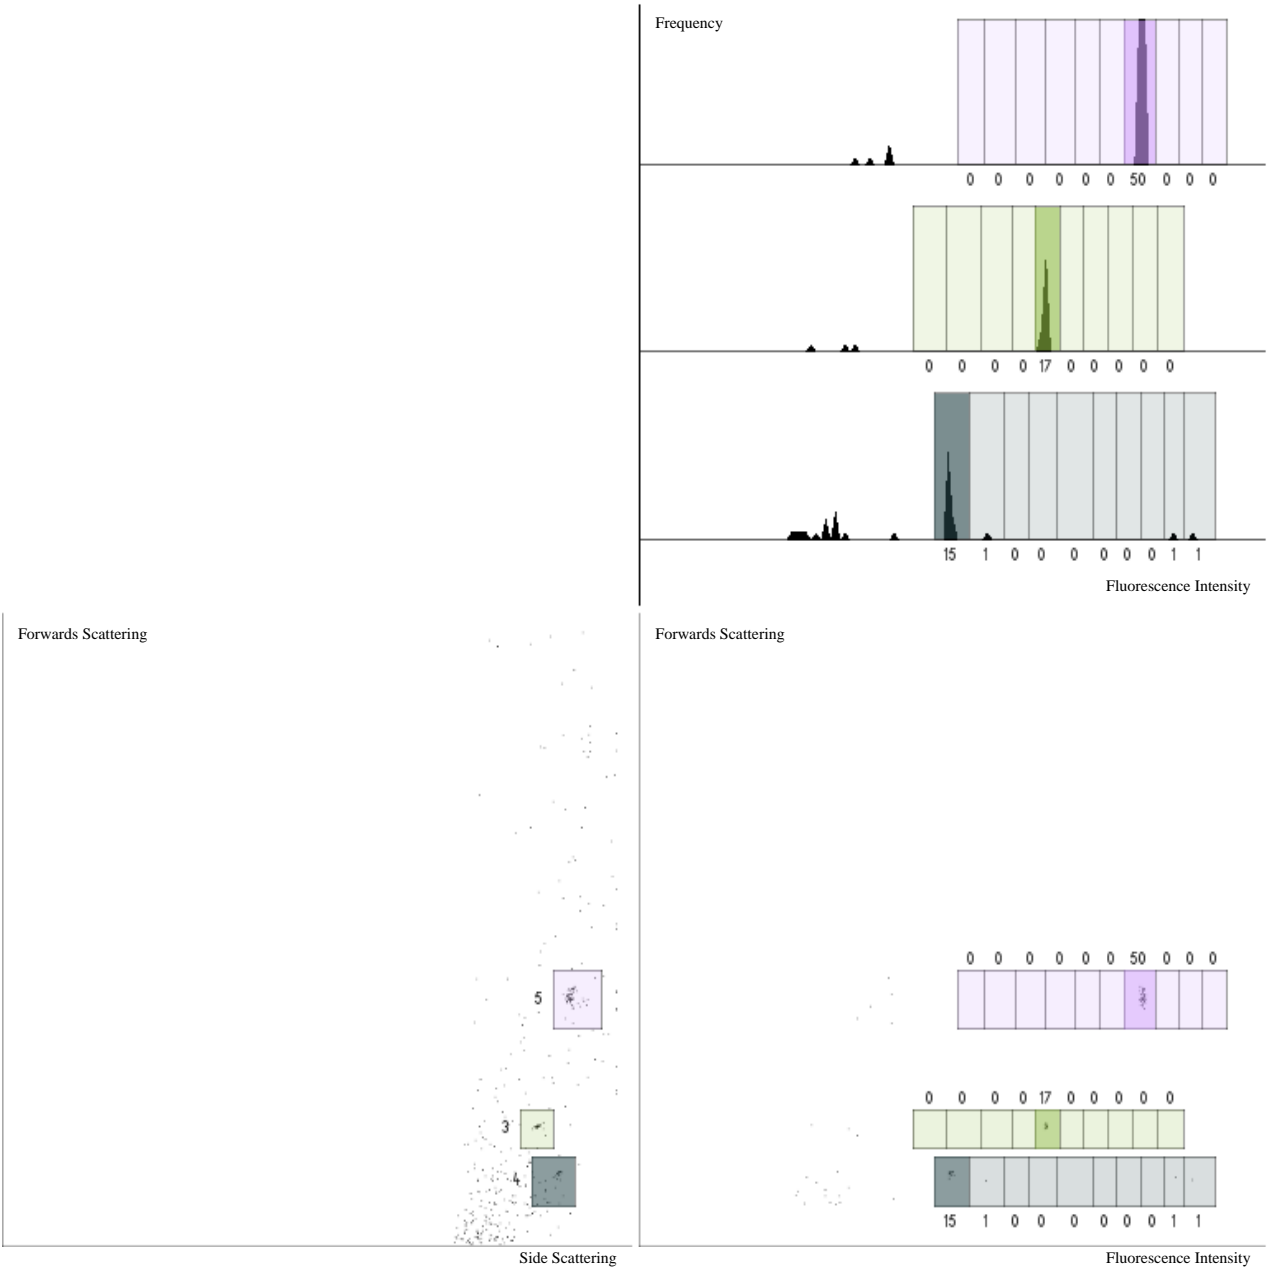

ANNEX 3: TAG DECONVOLUTION - BEAD 273

Passes flow sorting criteria: Yes  
Passes tag deconvolution criteria: No  
Included in protocol analysis: No  
Protocol: N/A  
Filename: Bin3\_plateA2\_B2.fcs  
Split 1: Petrol shading  
Split 2: Green shading  
Split 3: Violet shading

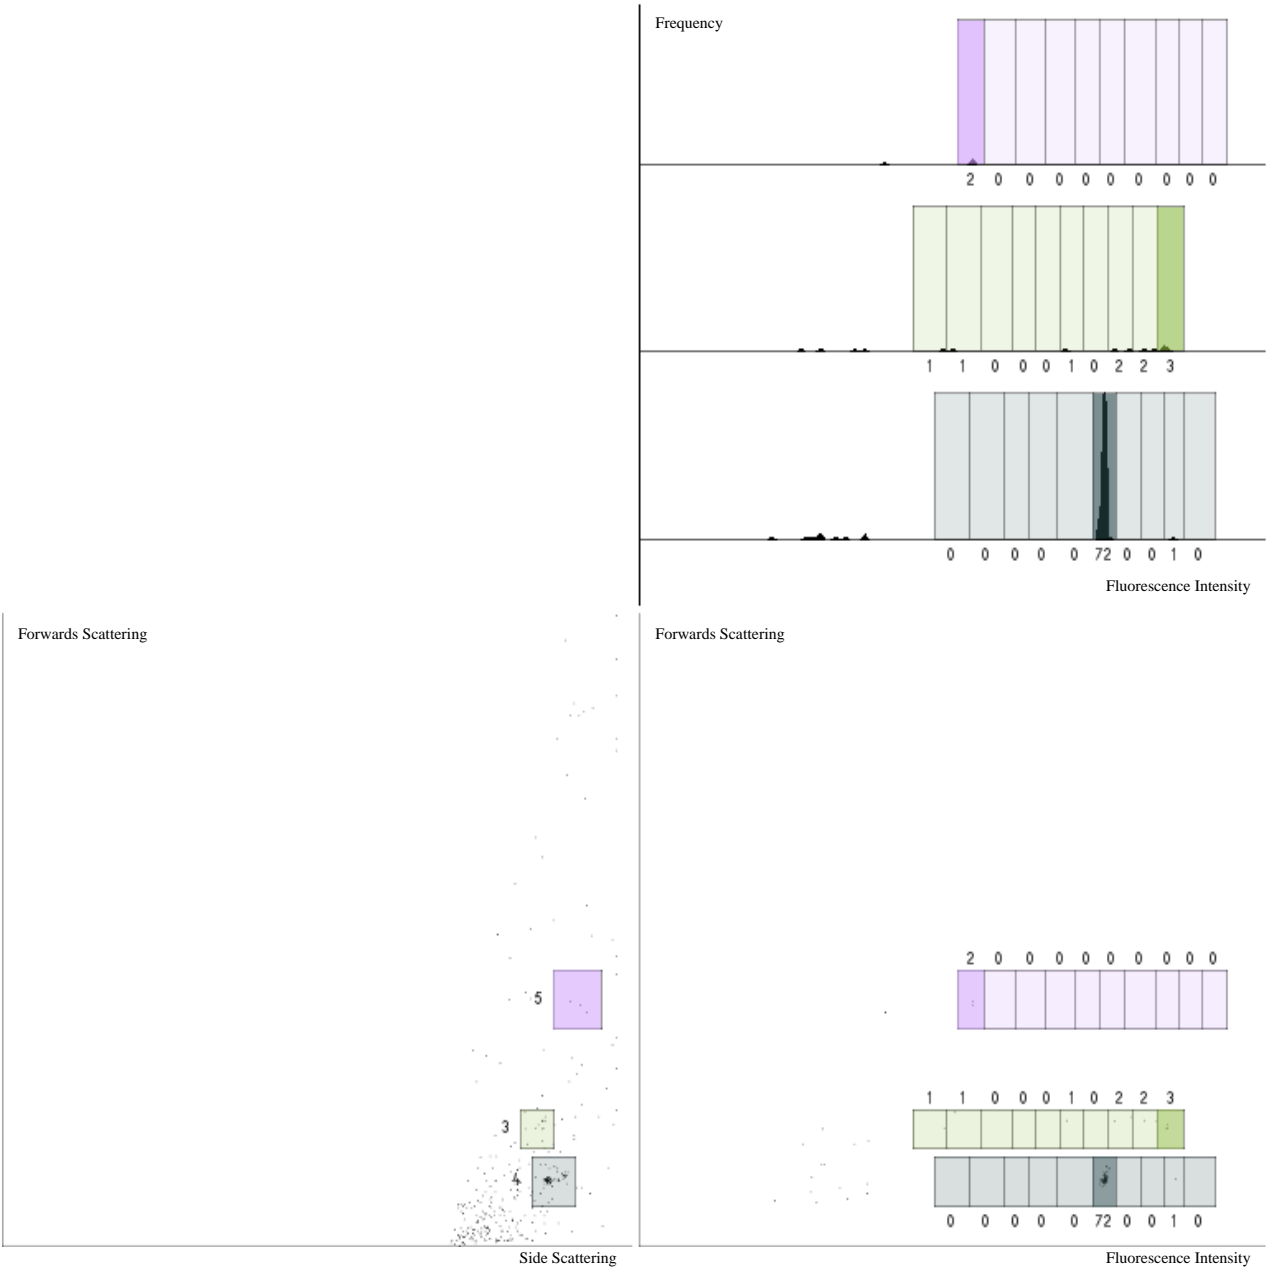

ANNEX 3: TAG DECONVOLUTION - BEAD 274

Passes flow sorting criteria: Yes  
Passes tag deconvolution criteria: Yes  
Included in protocol analysis: Yes  
Protocol: 7, 10, 2, 3  
Filename: Bin3\_plateA2\_B3.fcs  
Split 1: Petrol shading  
Split 2: Green shading  
Split 3: Violet shading

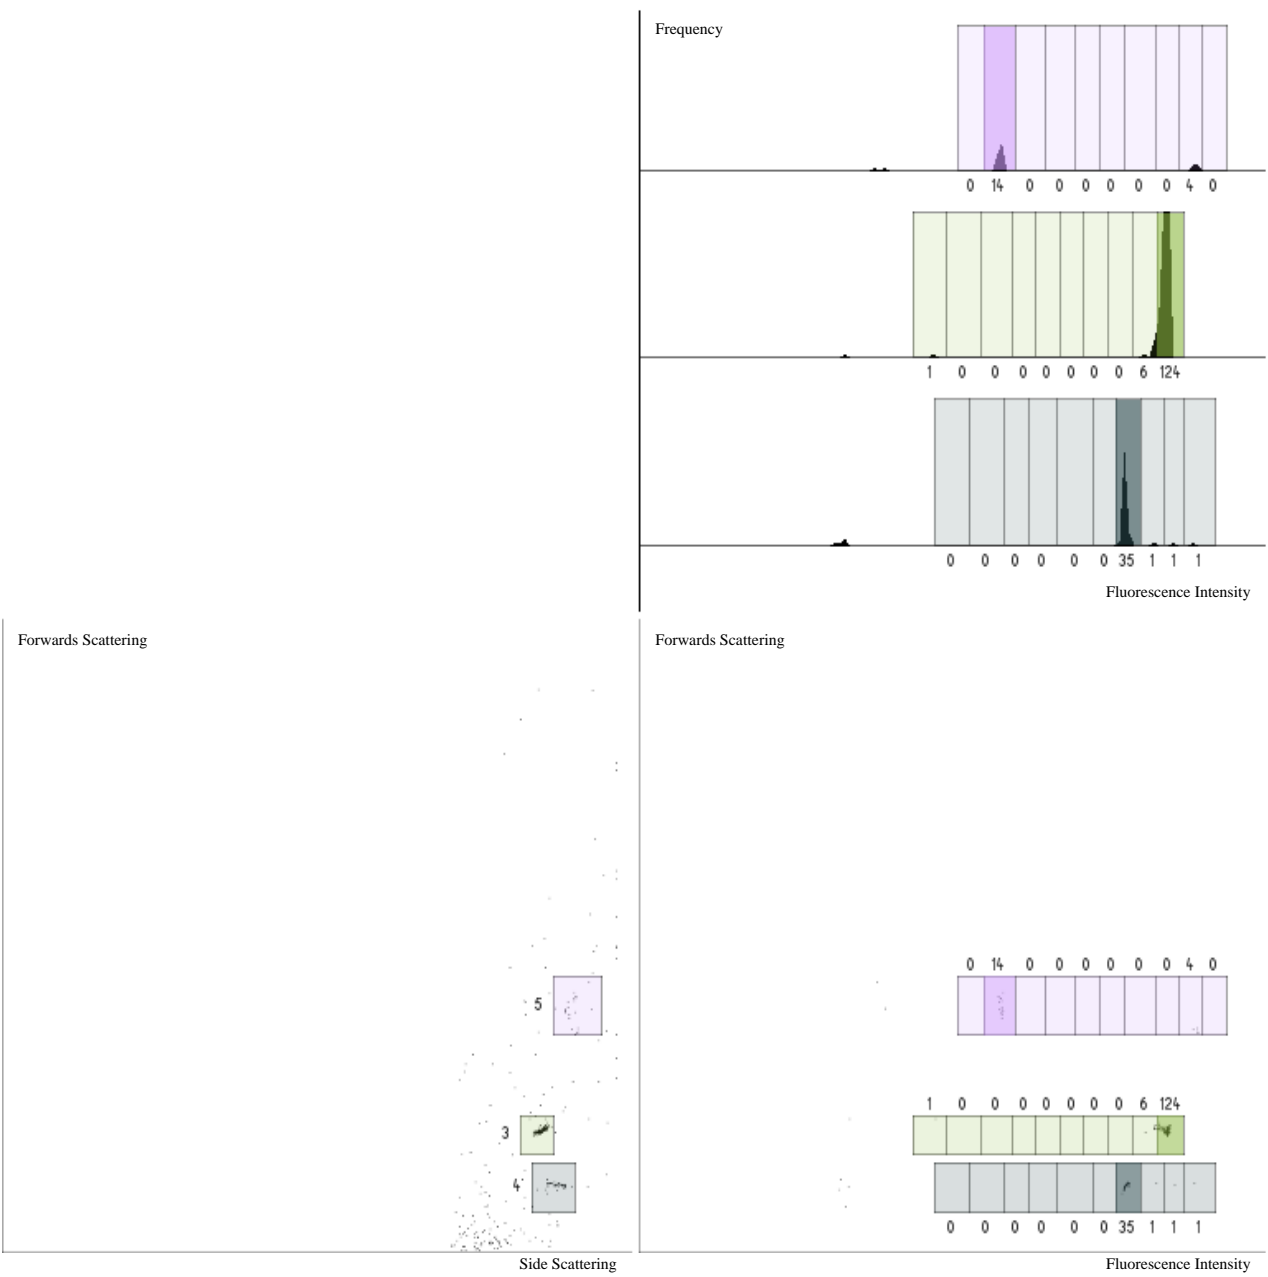

ANNEX 3: TAG DECONVOLUTION - BEAD 275

Passes flow sorting criteria: Yes  
Passes tag deconvolution criteria: No  
Included in protocol analysis: No  
Protocol: N/A  
Filename: Bin3\_plateA2\_B5.fcs  
Split 1: Petrol shading  
Split 2: Green shading  
Split 3: Violet shading

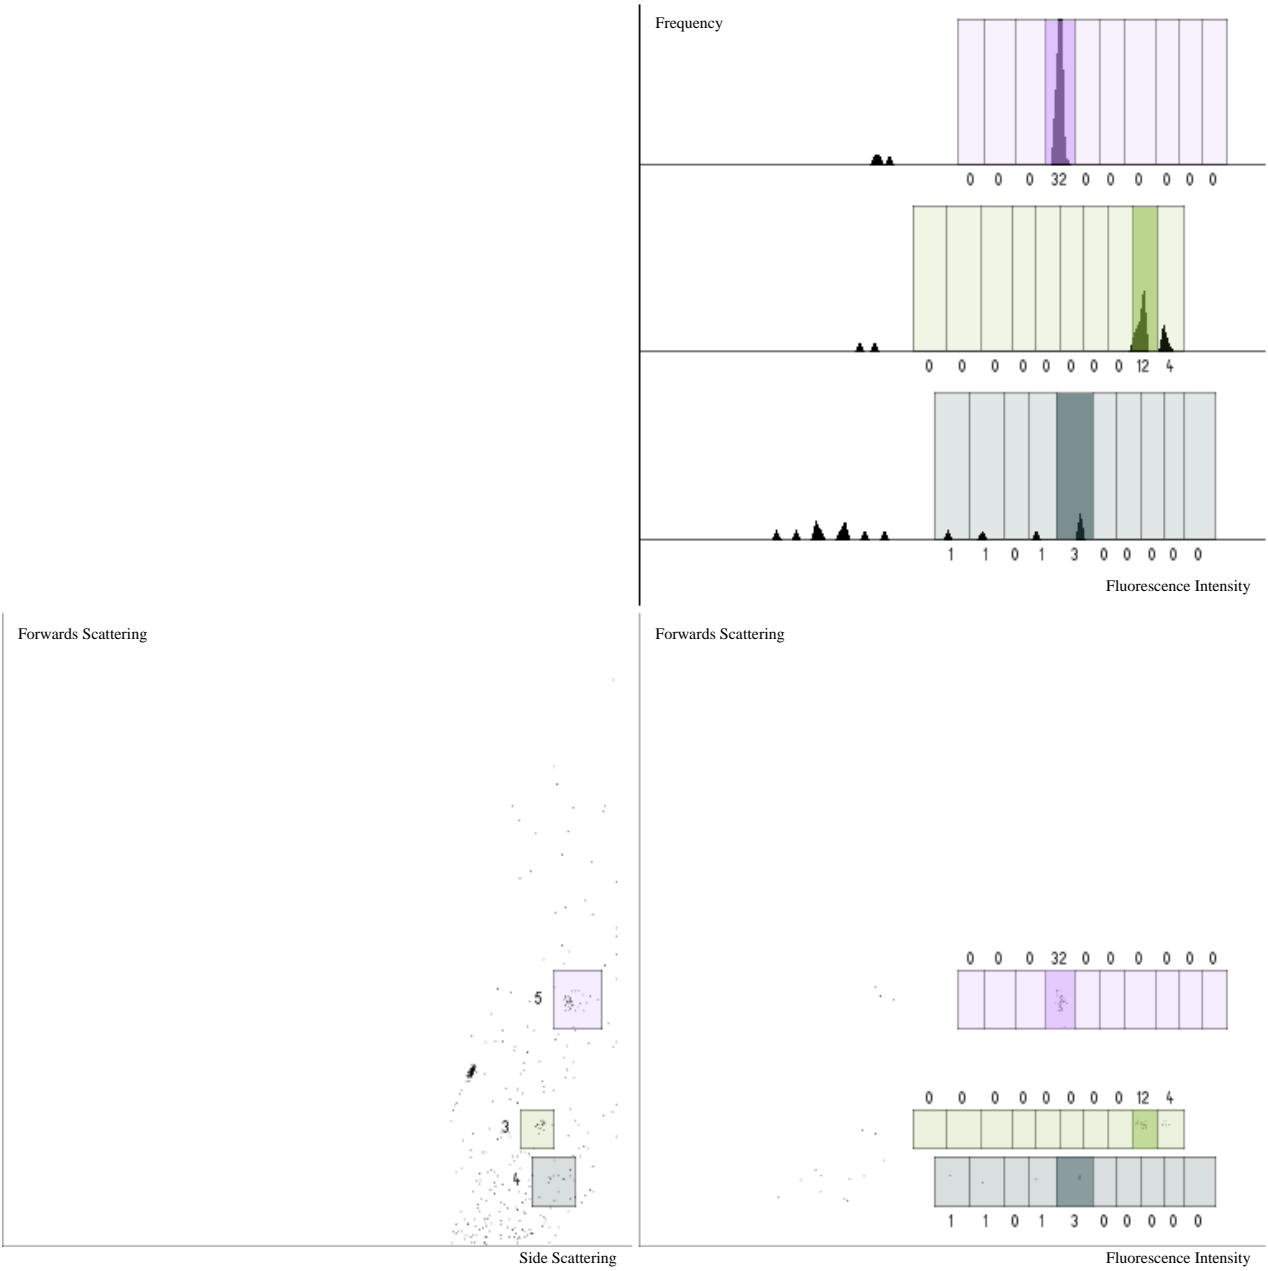

ANNEX 3: TAG DECONVOLUTION - BEAD 276

Passes flow sorting criteria: Yes  
Passes tag deconvolution criteria: Yes  
Included in protocol analysis: Yes  
Protocol: 2, 6, 10, 3  
Filename: Bin3\_plateA2\_B6.fcs  
Split 1: Petrol shading  
Split 2: Green shading  
Split 3: Violet shading

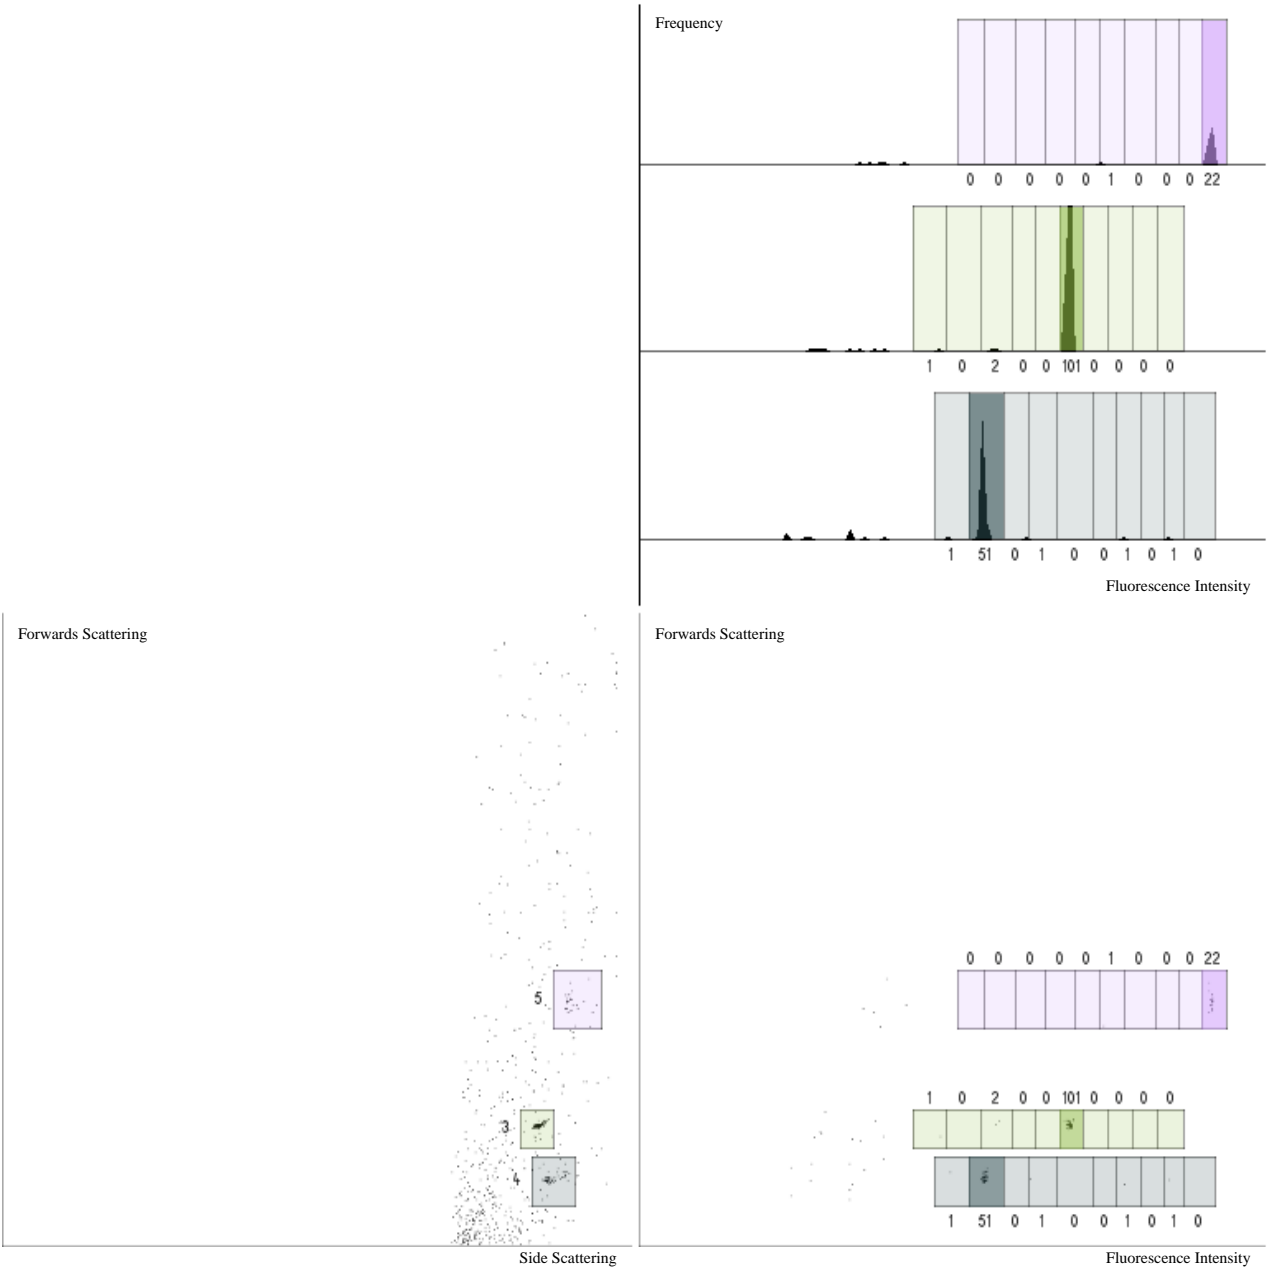

ANNEX 3: TAG DECONVOLUTION - BEAD 277

Passes flow sorting criteria: Yes  
Passes tag deconvolution criteria: Yes  
Included in protocol analysis: Yes  
Protocol: 7, 10, 3, 3  
Filename: Bin3\_plateA2\_B7.fcs  
Split 1: Petrol shading  
Split 2: Green shading  
Split 3: Violet shading

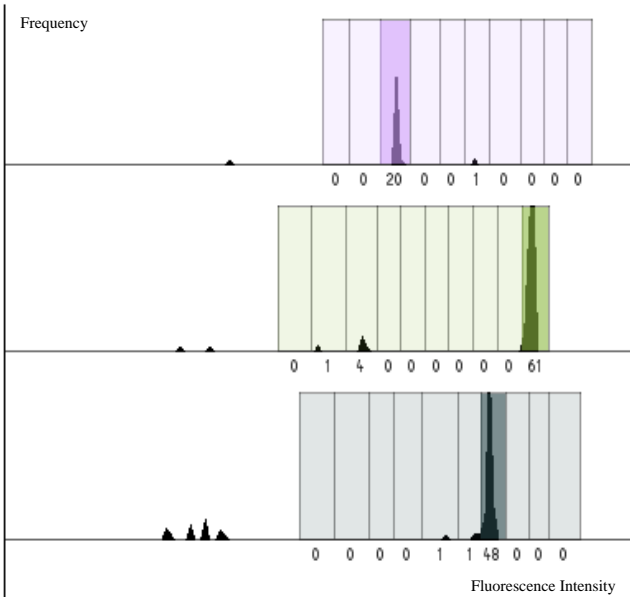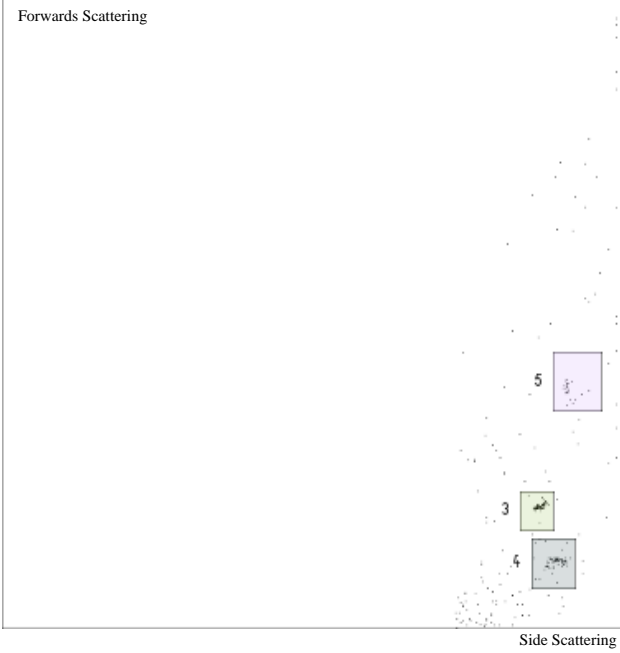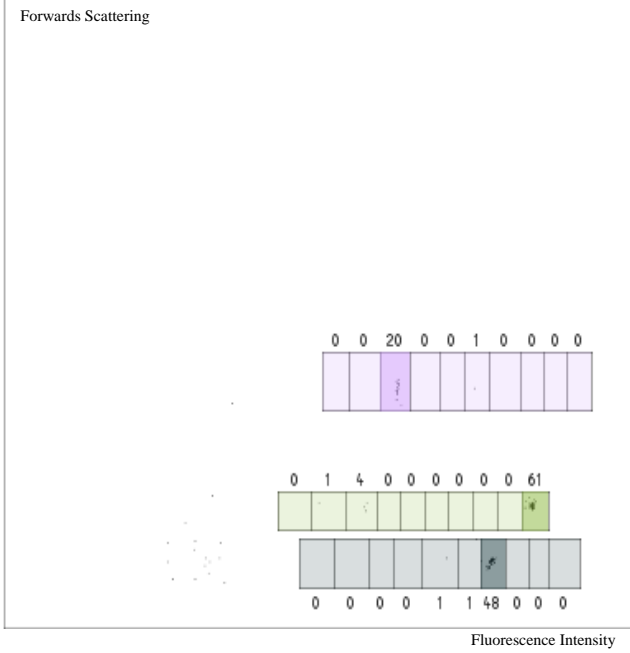

ANNEX 3: TAG DECONVOLUTION - BEAD 278

Passes flow sorting criteria: Yes  
Passes tag deconvolution criteria: Yes  
Included in protocol analysis: Yes  
Protocol: 5, 10, 9, 3  
Filename: Bin3\_plateA2\_B8.fcs  
Split 1: Petrol shading  
Split 2: Green shading  
Split 3: Violet shading

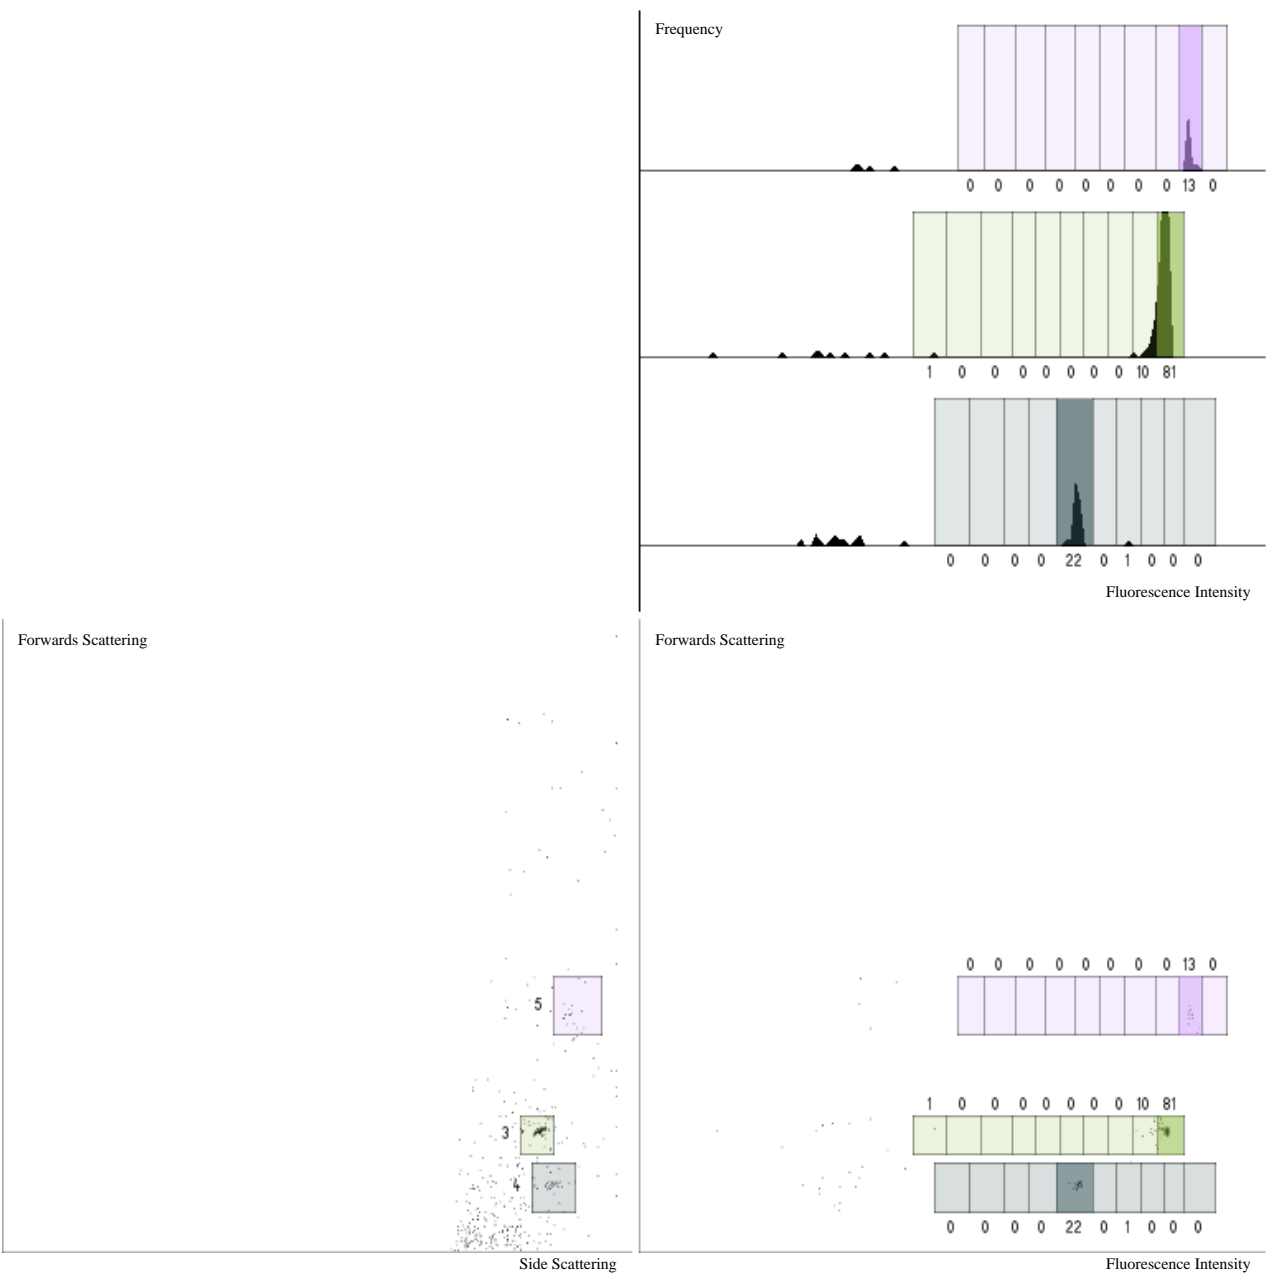



ANNEX 3: TAG DECONVOLUTION - BEAD 279

Passes flow sorting criteria: Yes  
Passes tag deconvolution criteria: No  
Included in protocol analysis: No  
Protocol: N/A  
Filename: Bin3\_plateA2\_B12.fcs  
Split 1: Petrol shading  
Split 2: Green shading  
Split 3: Violet shading

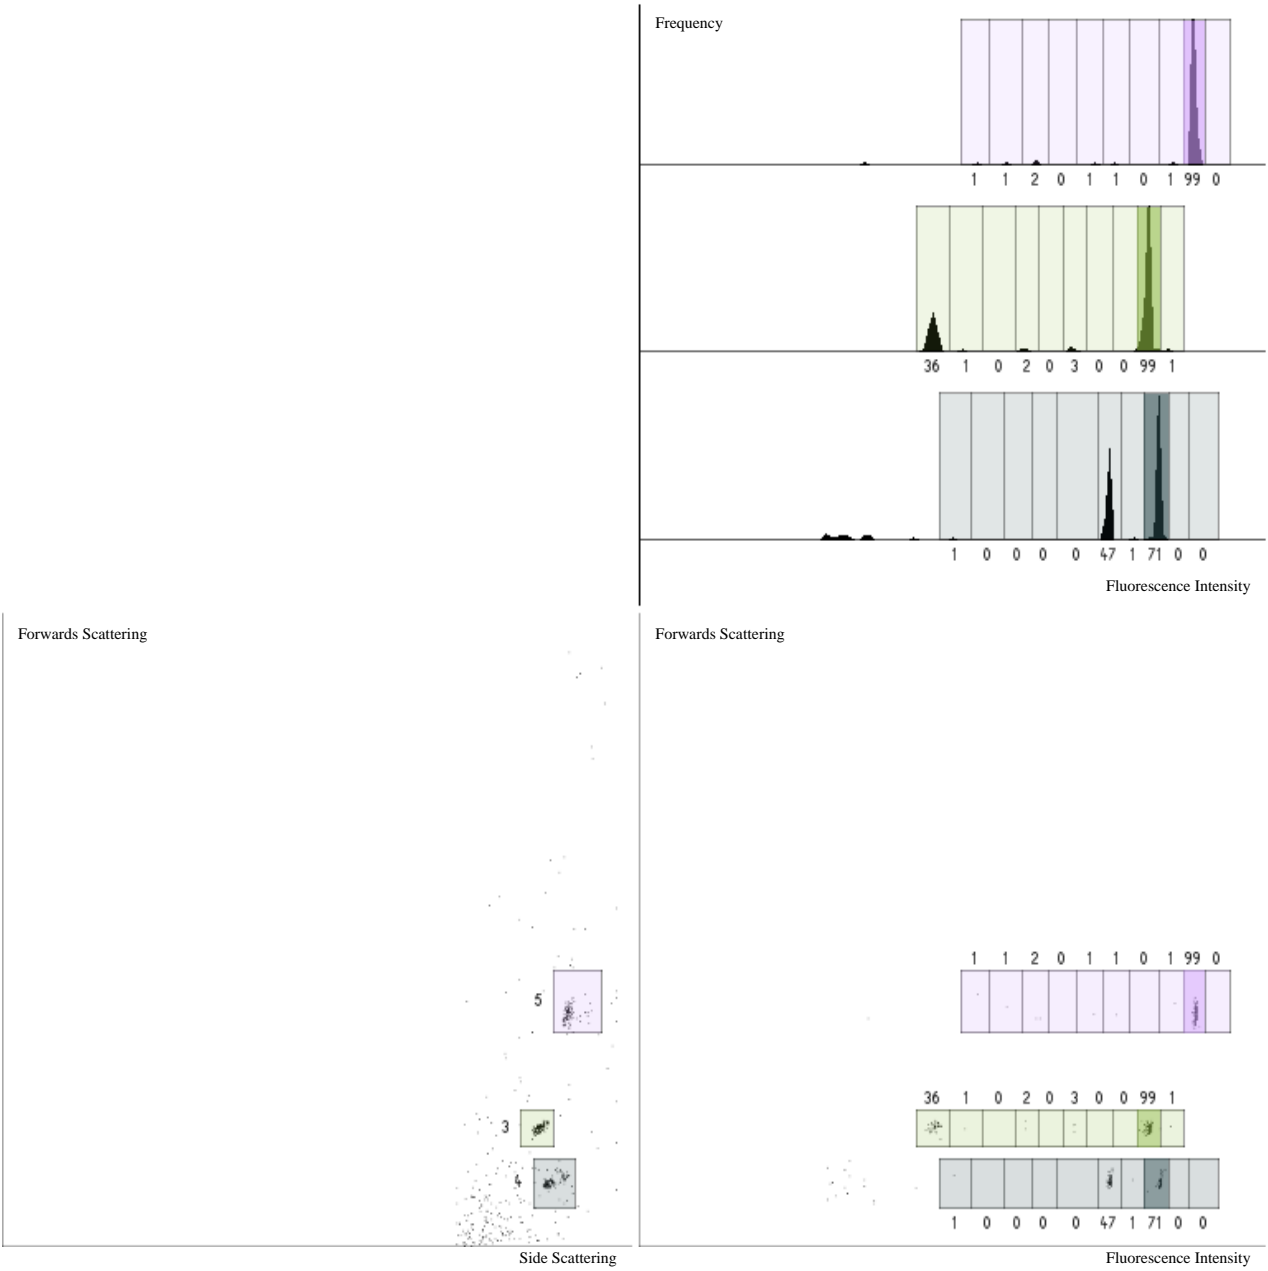

ANNEX 3: TAG DECONVOLUTION - BEAD 280

Passes flow sorting criteria: Yes  
Passes tag deconvolution criteria: Yes  
Included in protocol analysis: Yes  
Protocol: 1, 5, 3, 3  
Filename: Bin3\_plateA2\_B10.fcs  
Split 1: Petrol shading  
Split 2: Green shading  
Split 3: Violet shading

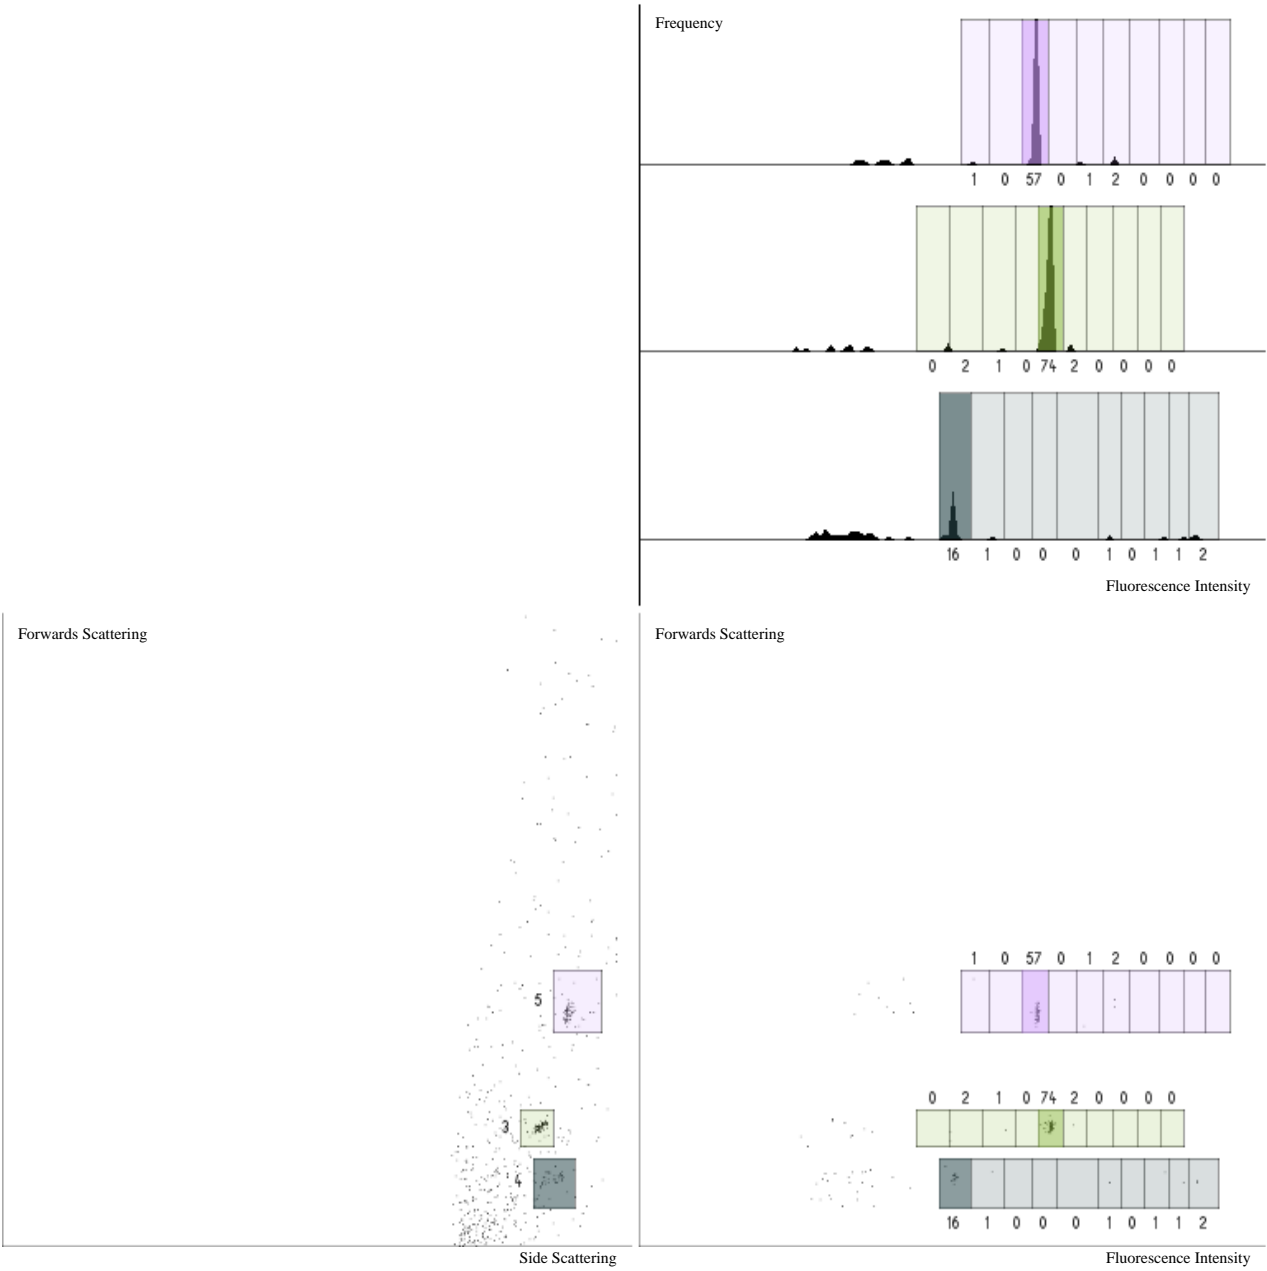

ANNEX 3: TAG DECONVOLUTION - BEAD 281

Passes flow sorting criteria: Yes  
Passes tag deconvolution criteria: Yes  
Included in protocol analysis: Yes  
Protocol: 3, 5, 2, 3  
Filename: Bin3\_plateA2\_B11.fcs  
Split 1: Petrol shading  
Split 2: Green shading  
Split 3: Violet shading

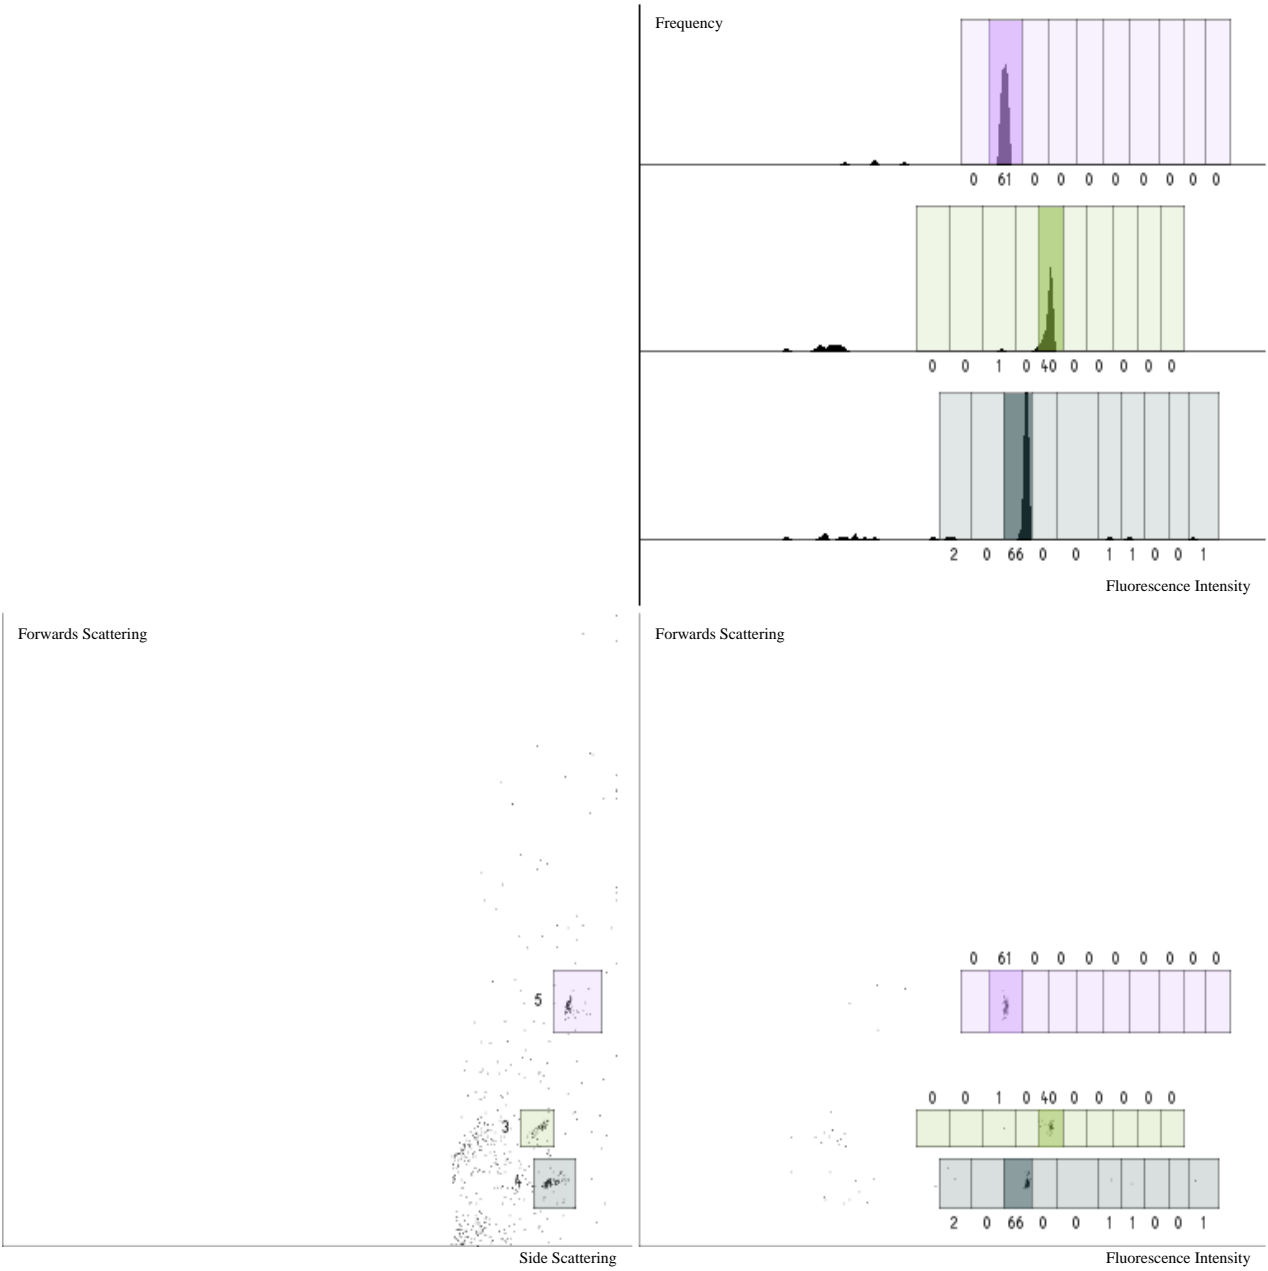

ANNEX 3: TAG DECONVOLUTION - BEAD 282

Passes flow sorting criteria: Yes  
Passes tag deconvolution criteria: Yes  
Included in protocol analysis: Yes  
Protocol: 10, 8, 7, 4  
Filename: Bin4\_plateA2\_E8.fcs  
Split 1: Petrol shading  
Split 2: Green shading  
Split 3: Violet shading

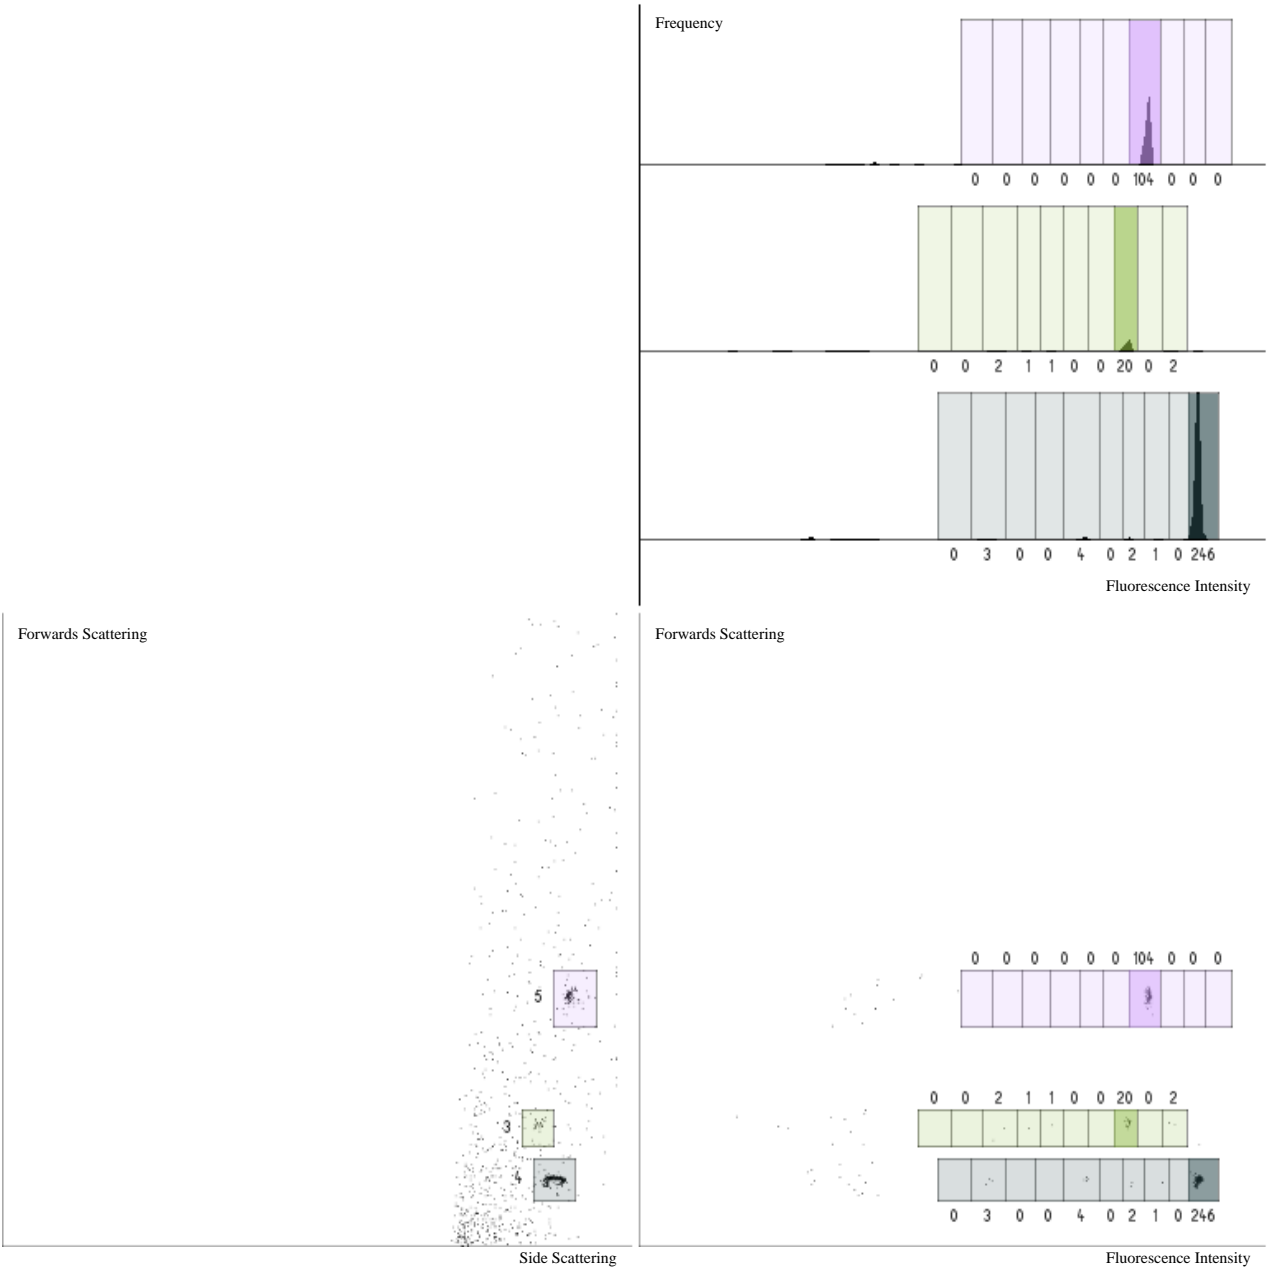

ANNEX 3: TAG DECONVOLUTION - BEAD 283

Passes flow sorting criteria: Yes  
Passes tag deconvolution criteria: Yes  
Included in protocol analysis: Yes  
Protocol: 10, 9, 5, 4  
Filename: Bin4\_plateA2\_D1.fcs  
Split 1: Petrol shading  
Split 2: Green shading  
Split 3: Violet shading

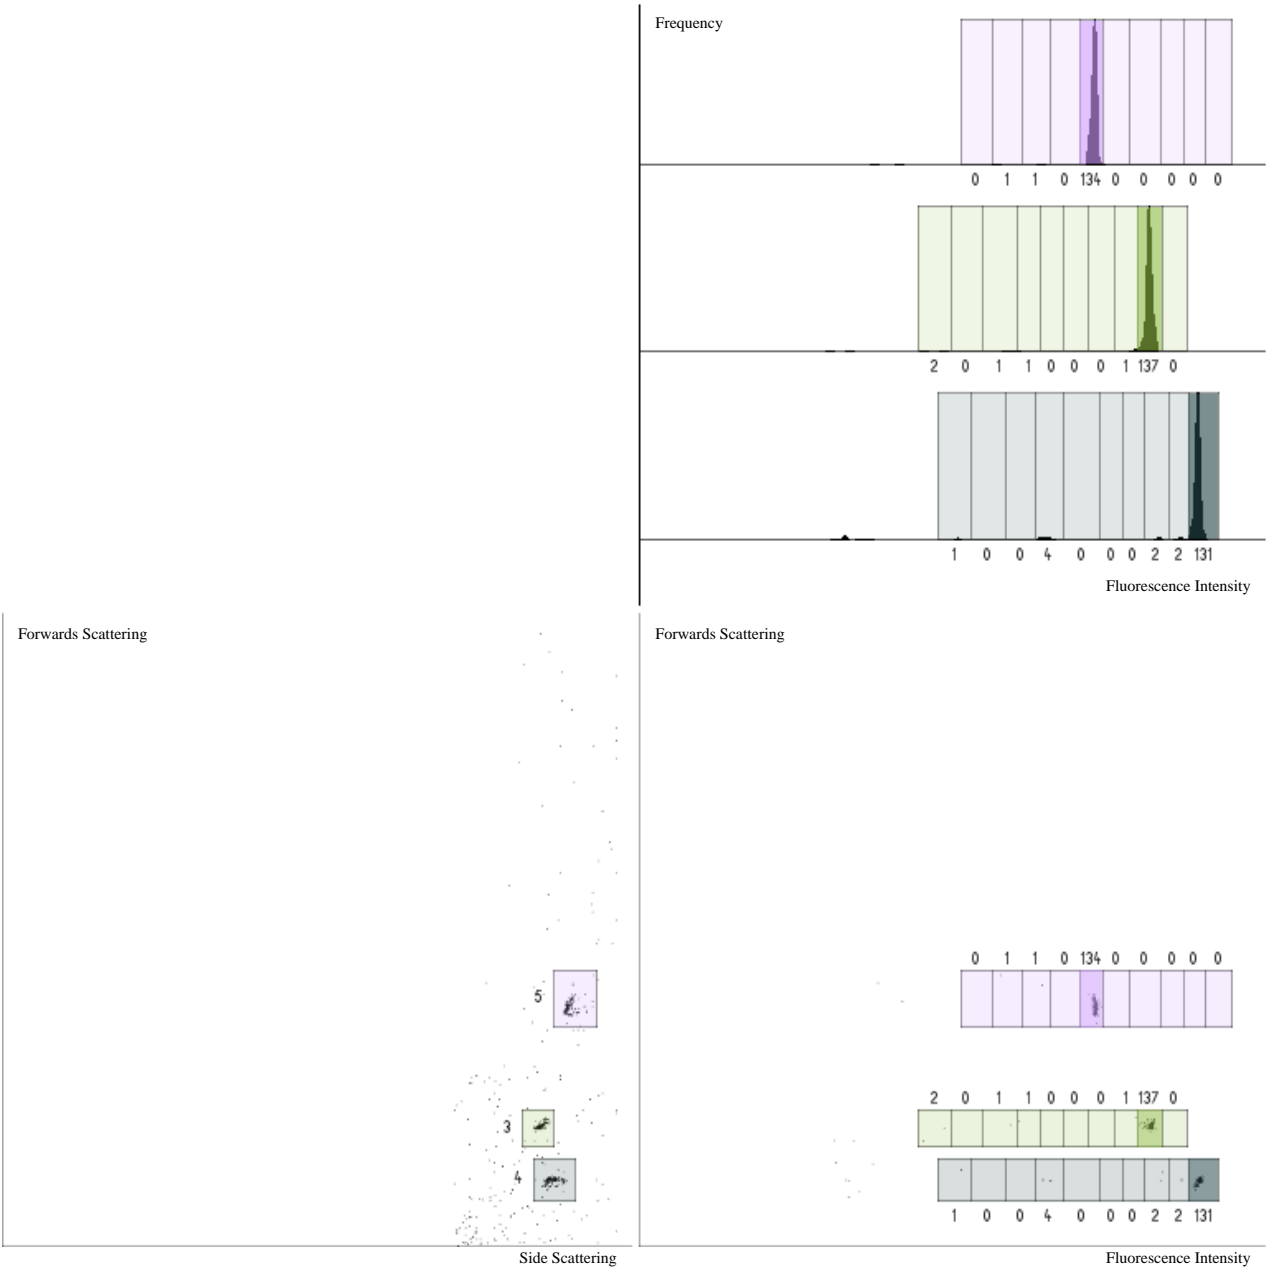

ANNEX 3: TAG DECONVOLUTION - BEAD 284

Passes flow sorting criteria: Yes  
Passes tag deconvolution criteria: Yes  
Included in protocol analysis: Yes  
Protocol: 1, 5, 2, 4  
Filename: Bin4\_plateA2\_D2.fcs  
Split 1: Petrol shading  
Split 2: Green shading  
Split 3: Violet shading

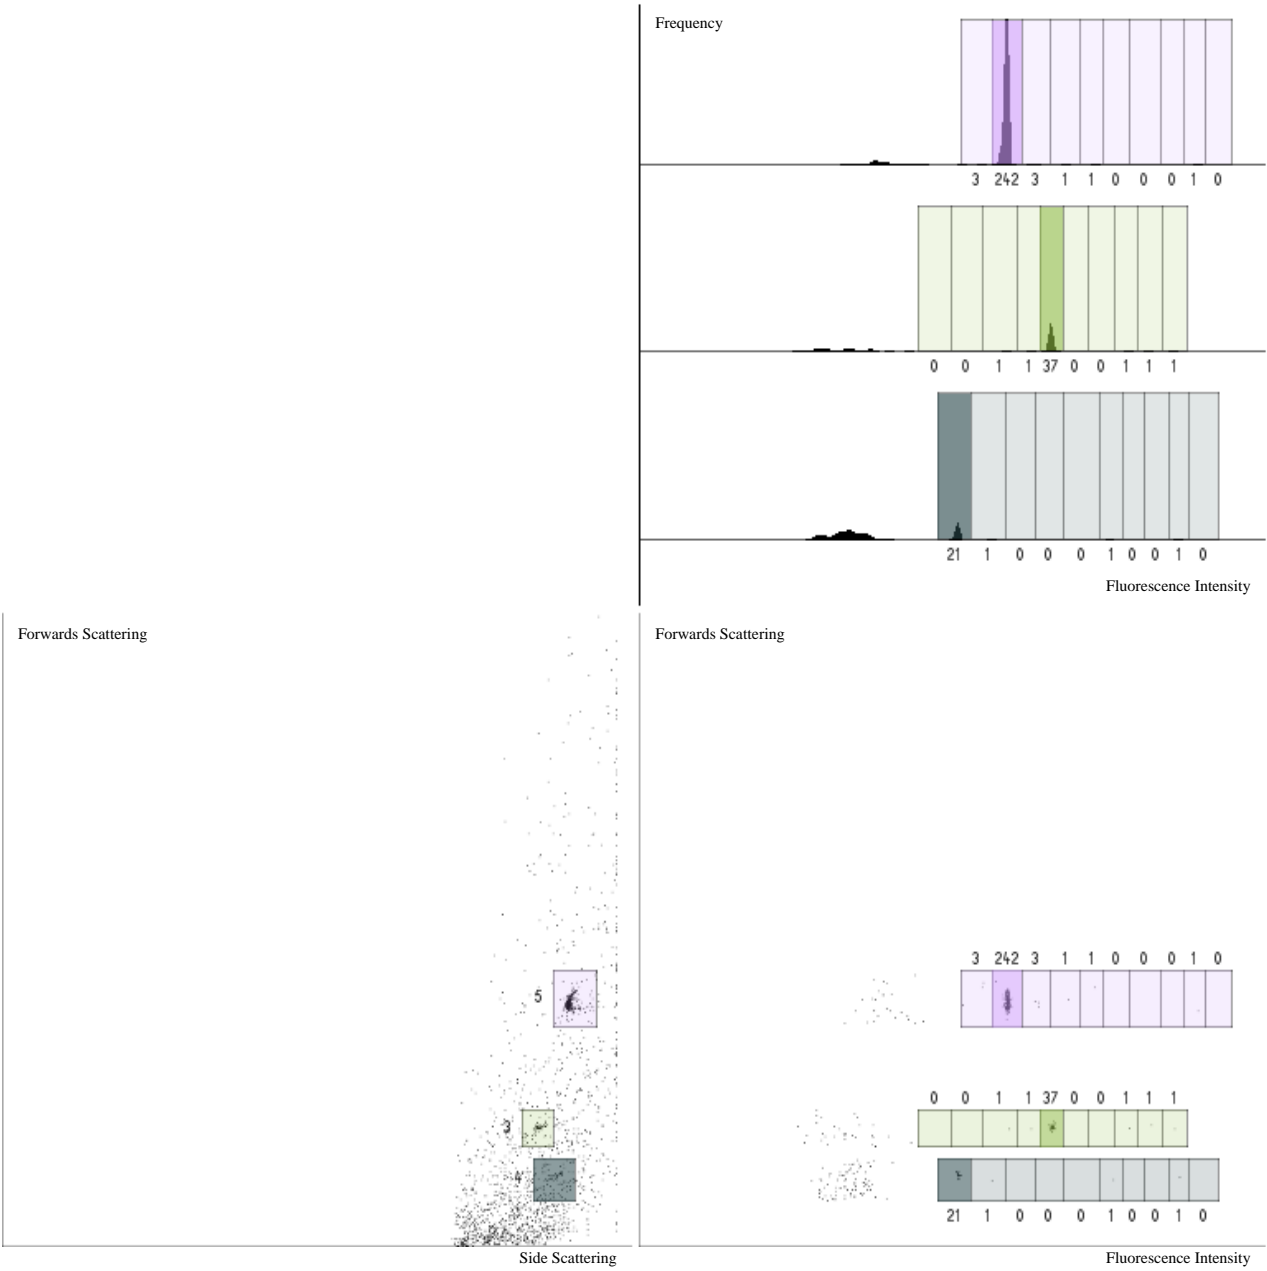

ANNEX 3: TAG DECONVOLUTION - BEAD 285

Passes flow sorting criteria: Yes  
Passes tag deconvolution criteria: Yes  
Included in protocol analysis: Yes  
Protocol: 10, 1, 5, 4  
Filename: Bin4\_plateA2\_D3.fcs  
Split 1: Petrol shading  
Split 2: Green shading  
Split 3: Violet shading

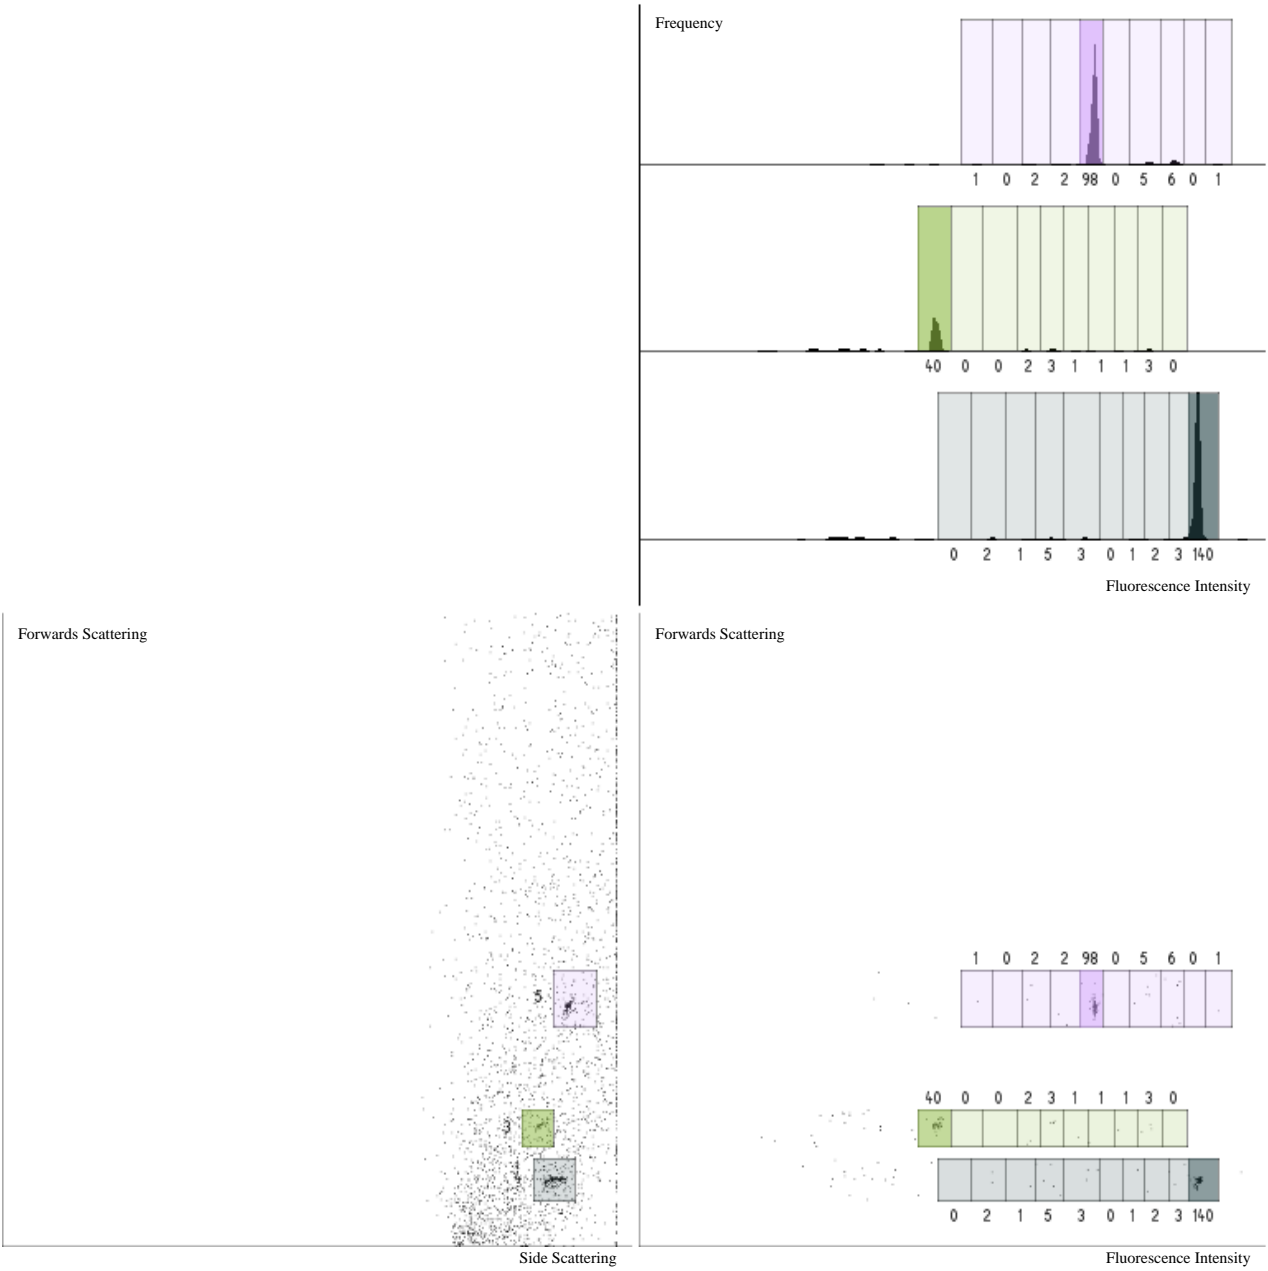

ANNEX 3: TAG DECONVOLUTION - BEAD 286

Passes flow sorting criteria: Yes  
Passes tag deconvolution criteria: Yes  
Included in protocol analysis: Yes  
Protocol: 3, 1, 8, 4  
Filename: Bin4\_plateA2\_D4.fcs  
Split 1: Petrol shading  
Split 2: Green shading  
Split 3: Violet shading

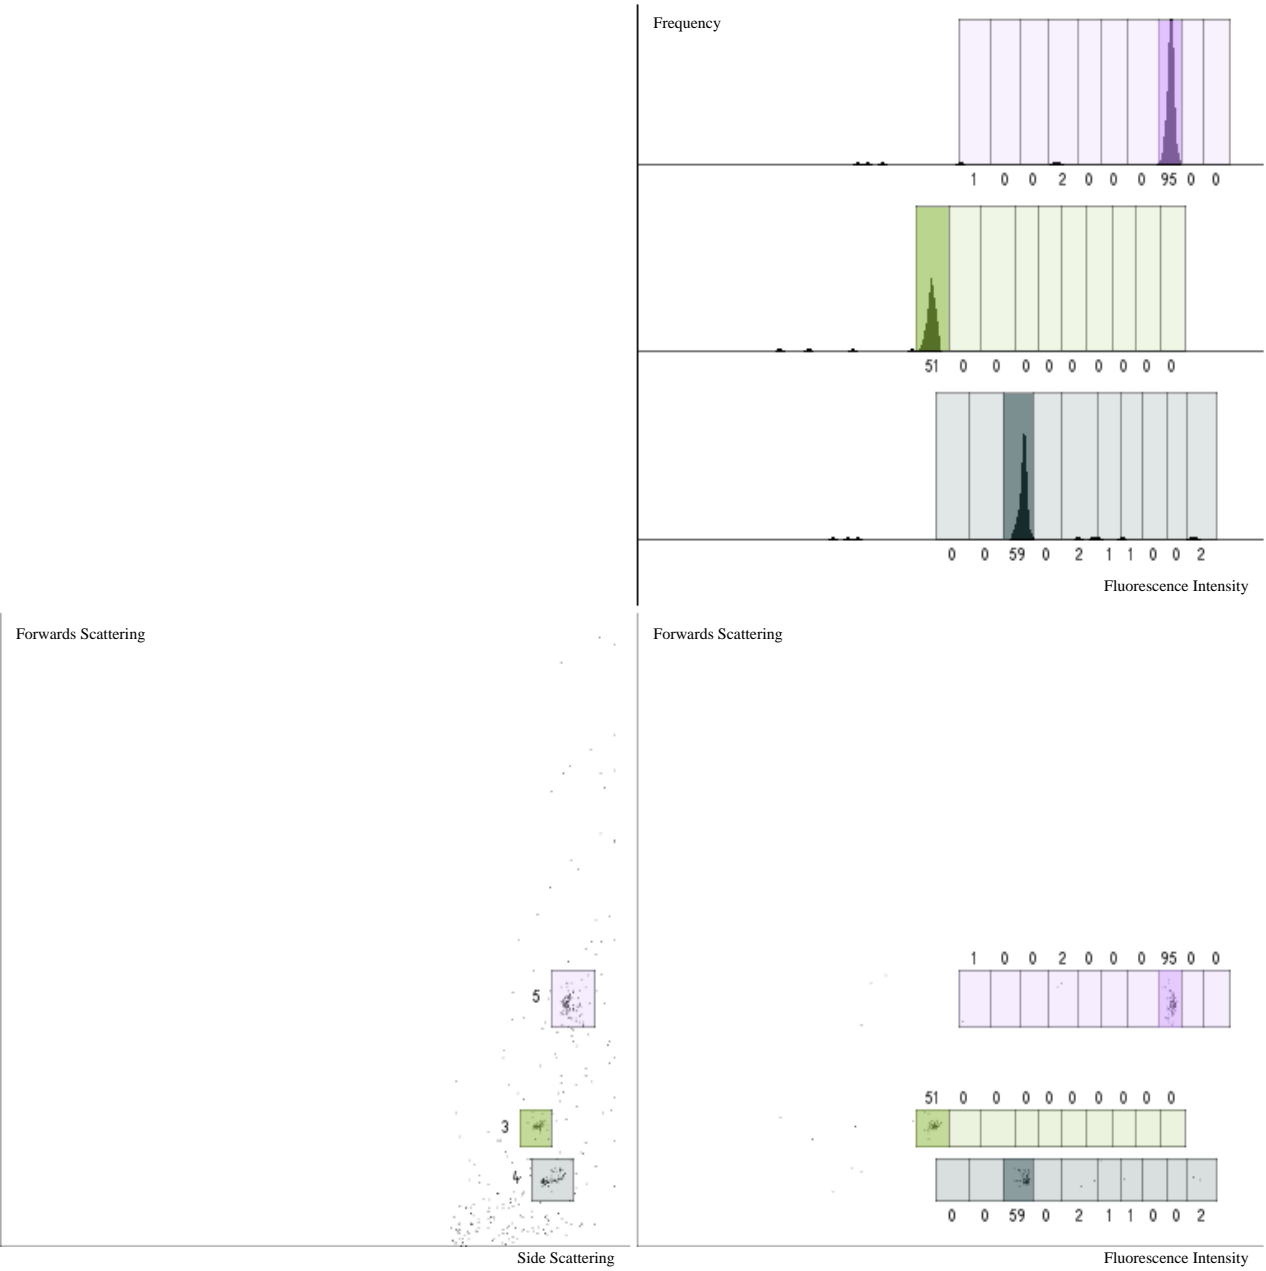



ANNEX 3: TAG DECONVOLUTION - BEAD 287

Passes flow sorting criteria: Yes  
Passes tag deconvolution criteria: Yes  
Included in protocol analysis: Yes  
Protocol: 3, 2, 2, 4  
Filename: Bin4\_plateA2\_D5.fcs  
Split 1: Petrol shading  
Split 2: Green shading  
Split 3: Violet shading

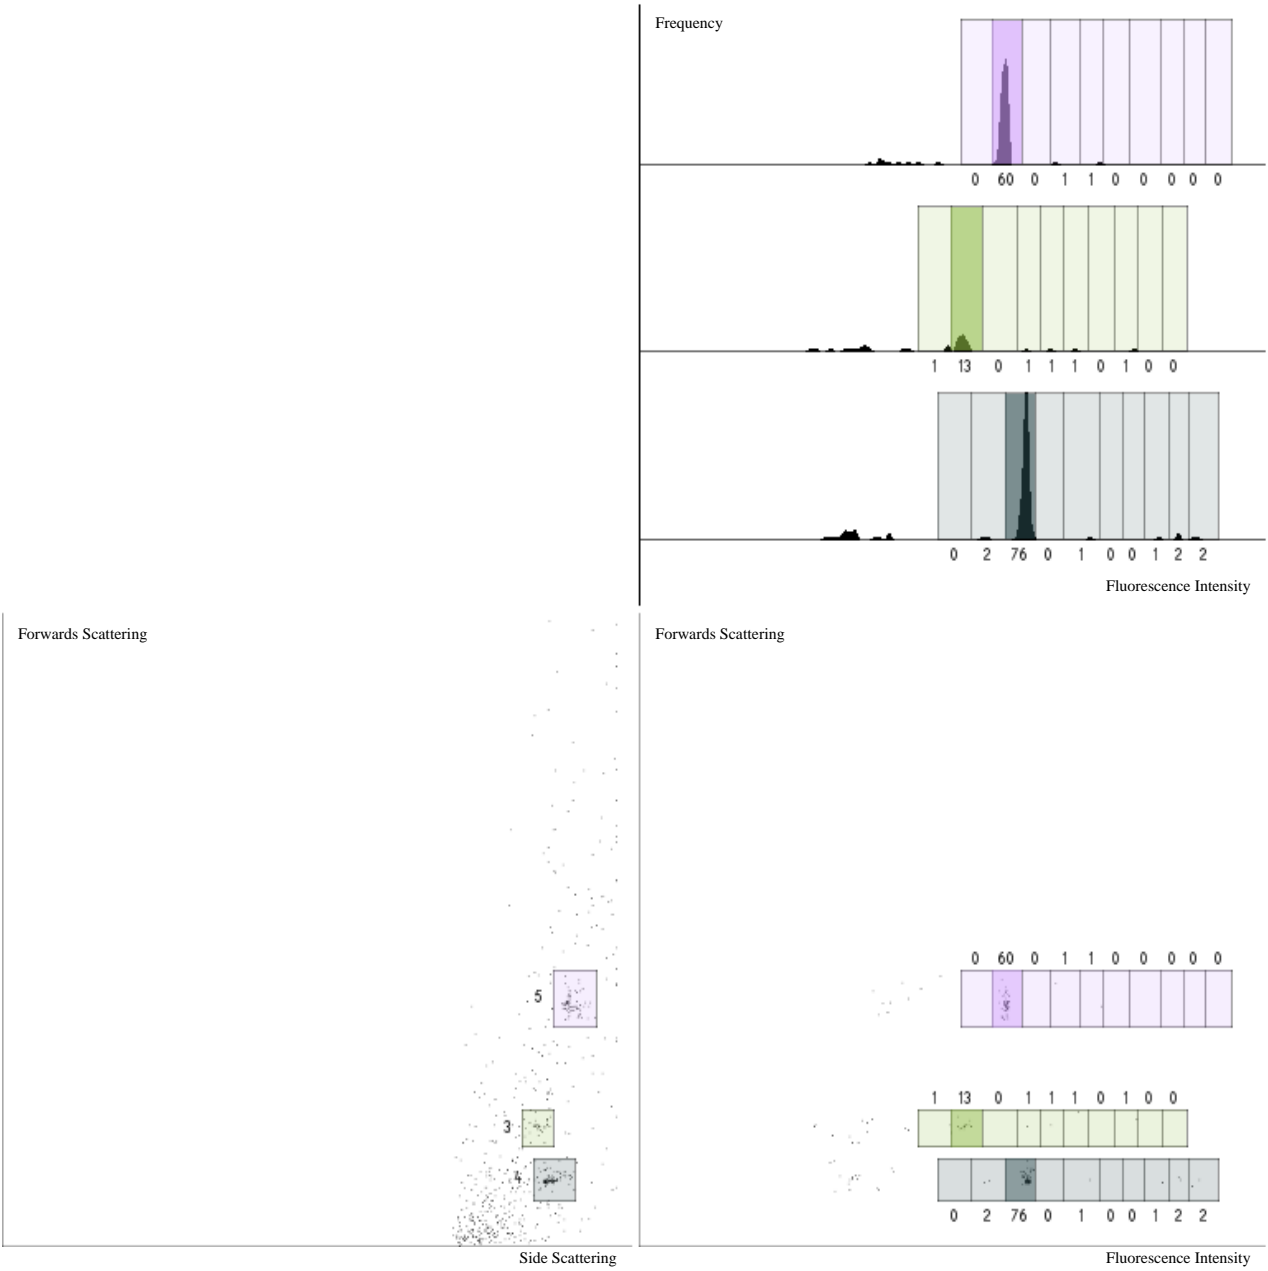

ANNEX 3: TAG DECONVOLUTION - BEAD 288

Passes flow sorting criteria: Yes  
Passes tag deconvolution criteria: Yes  
Included in protocol analysis: Yes  
Protocol: 1, 2, 9, 4  
Filename: Bin4\_plateA2\_D6.fcs  
Split 1: Petrol shading  
Split 2: Green shading  
Split 3: Violet shading

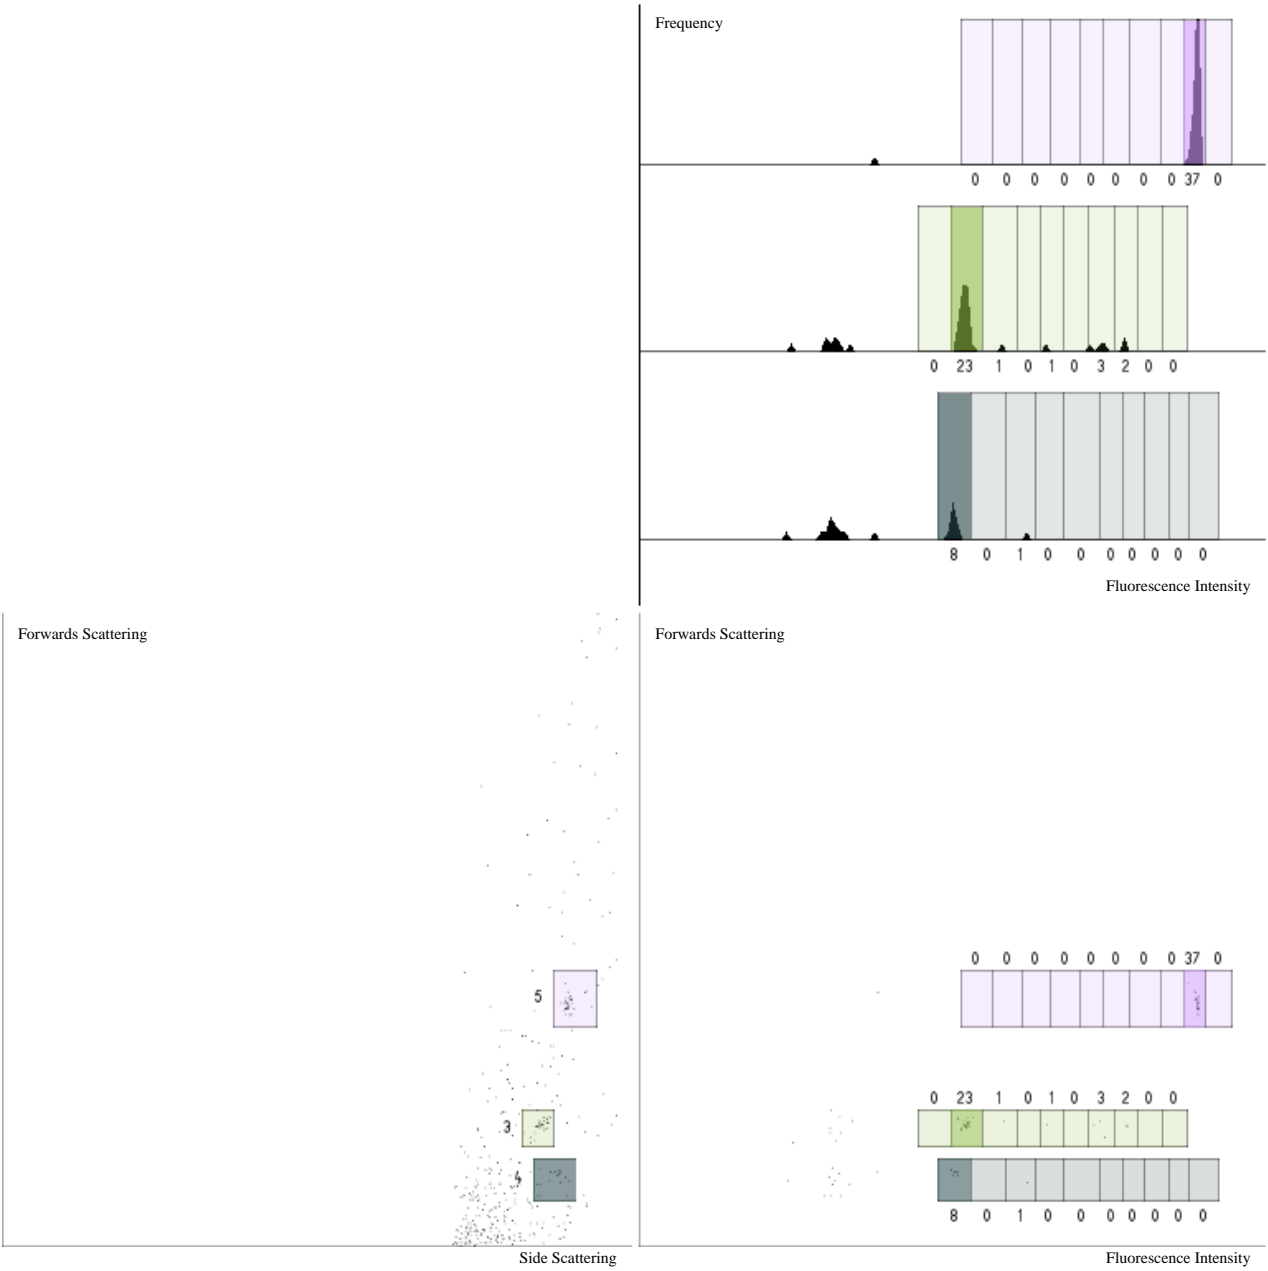

ANNEX 3: TAG DECONVOLUTION - BEAD 289

Passes flow sorting criteria: Yes  
Passes tag deconvolution criteria: No  
Included in protocol analysis: No  
Protocol: N/A  
Filename: Bin4\_plateA2\_D7.fcs  
Split 1: Petrol shading  
Split 2: Green shading  
Split 3: Violet shading

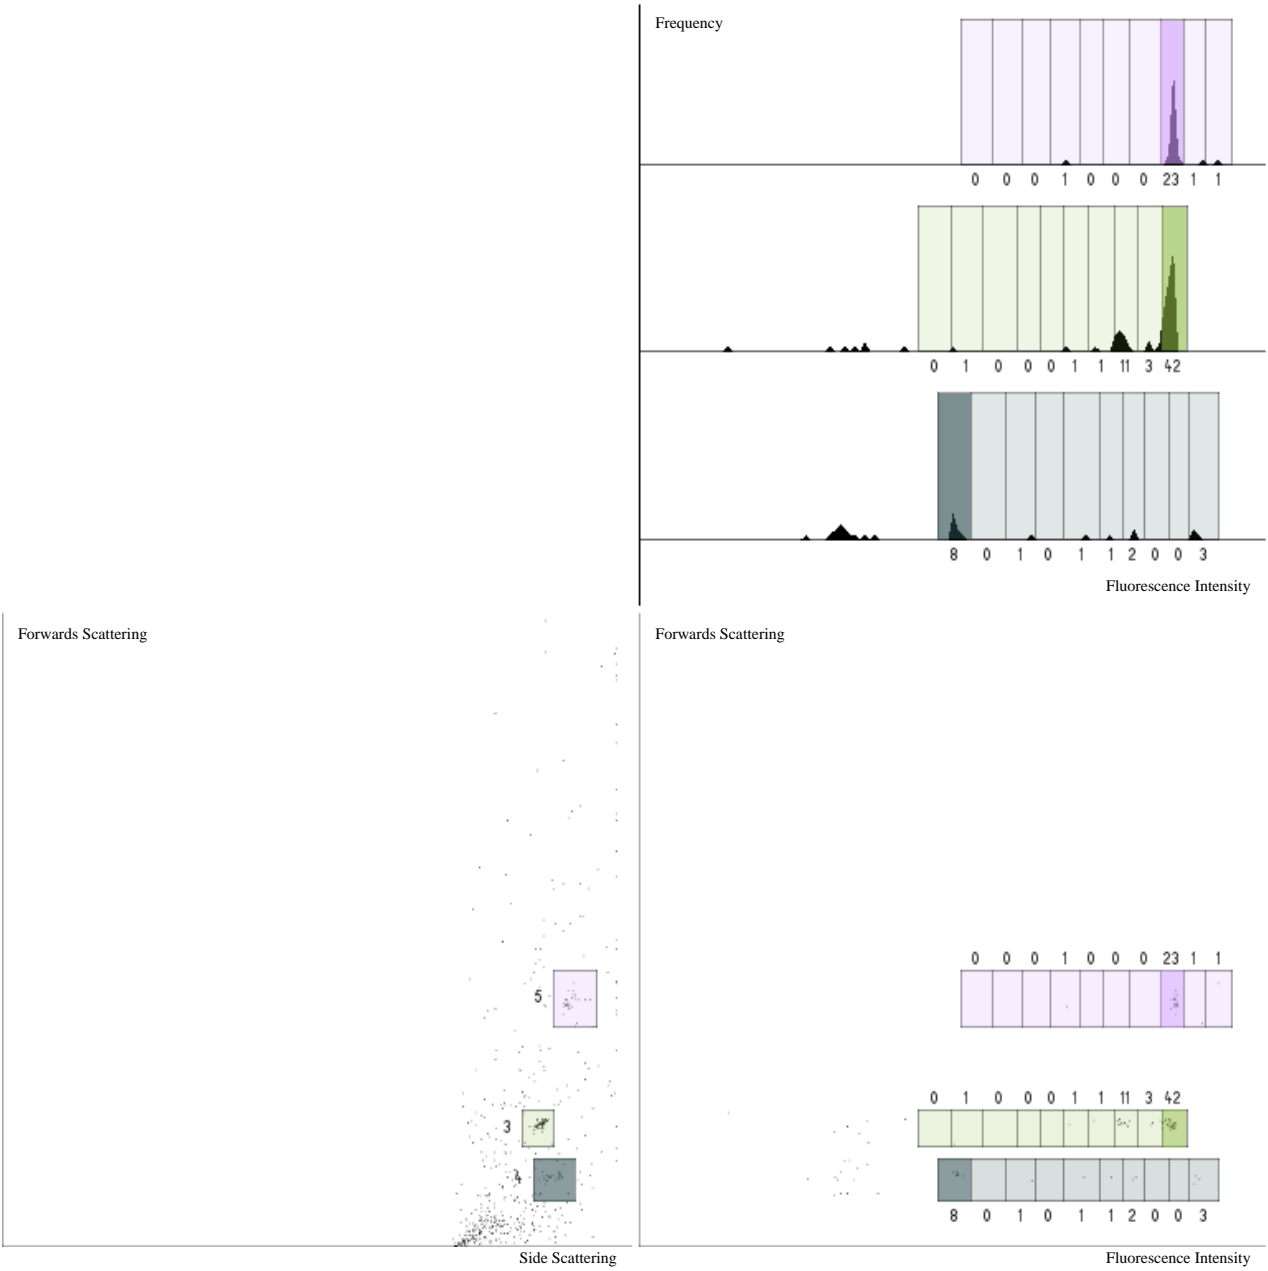

ANNEX 3: TAG DECONVOLUTION - BEAD 290

Passes flow sorting criteria: Yes  
Passes tag deconvolution criteria: No  
Included in protocol analysis: No  
Protocol: N/A  
Filename: Bin4\_plateA2\_D8.fcs  
Split 1: Petrol shading  
Split 2: Green shading  
Split 3: Violet shading

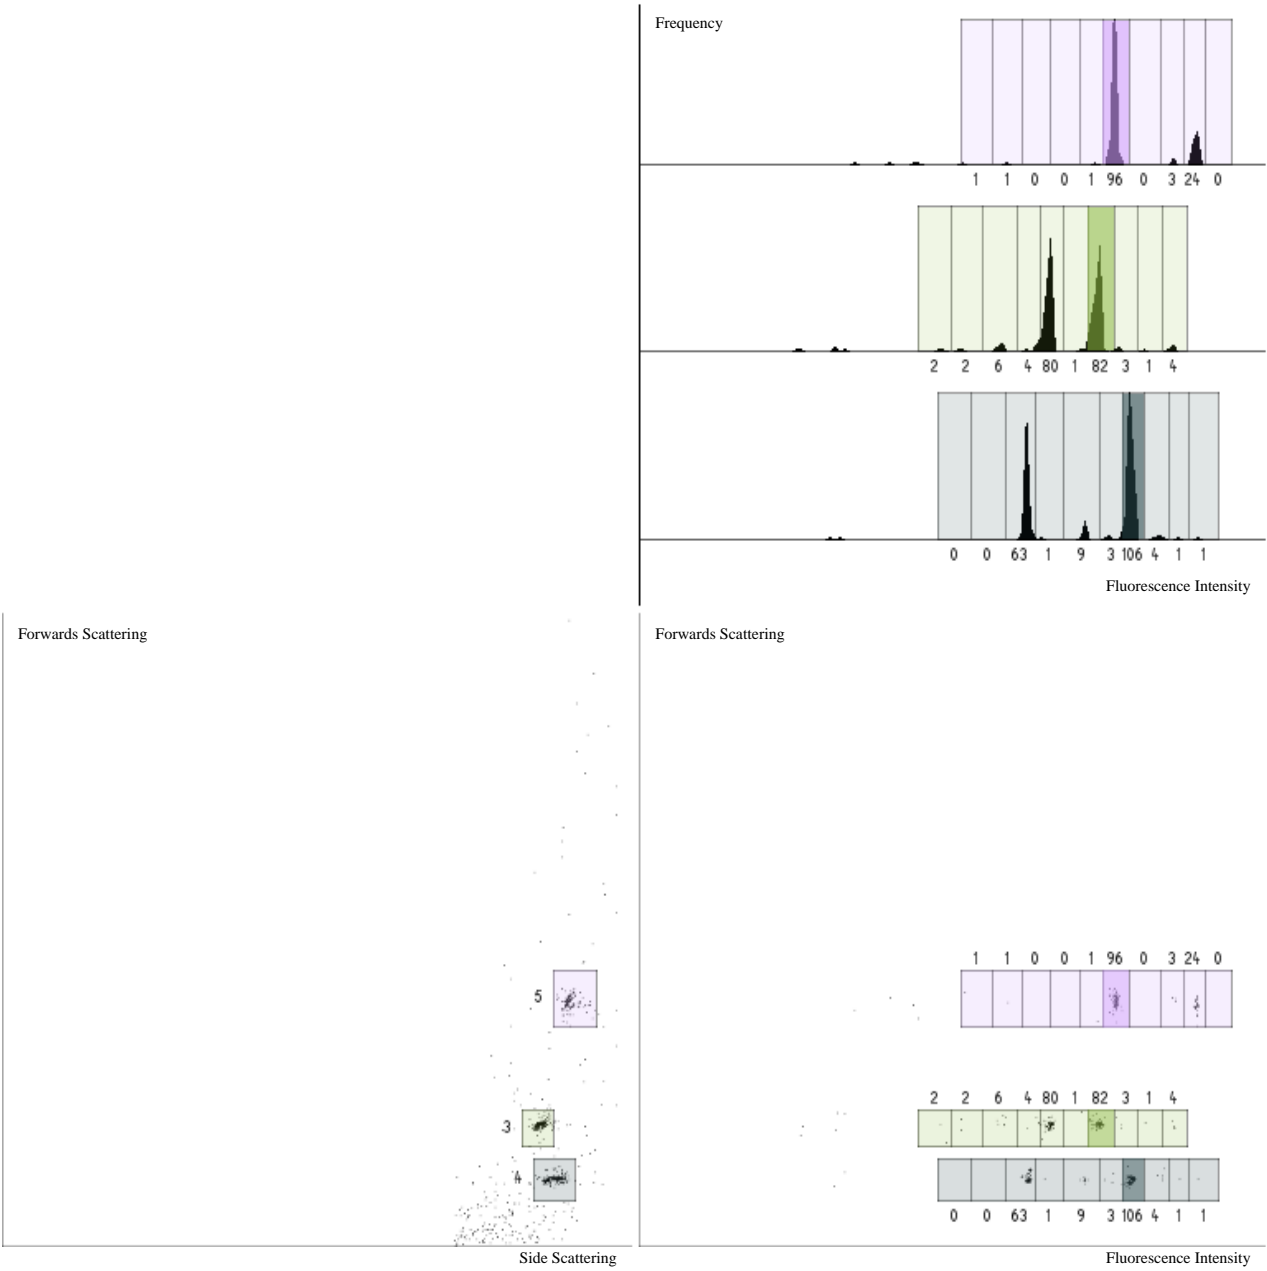

ANNEX 3: TAG DECONVOLUTION - BEAD 291

Passes flow sorting criteria: Yes  
Passes tag deconvolution criteria: Yes  
Included in protocol analysis: Yes  
Protocol: 5, 5, 1, 4  
Filename: Bin4\_plateA2\_D9.fcs  
Split 1: Petrol shading  
Split 2: Green shading  
Split 3: Violet shading

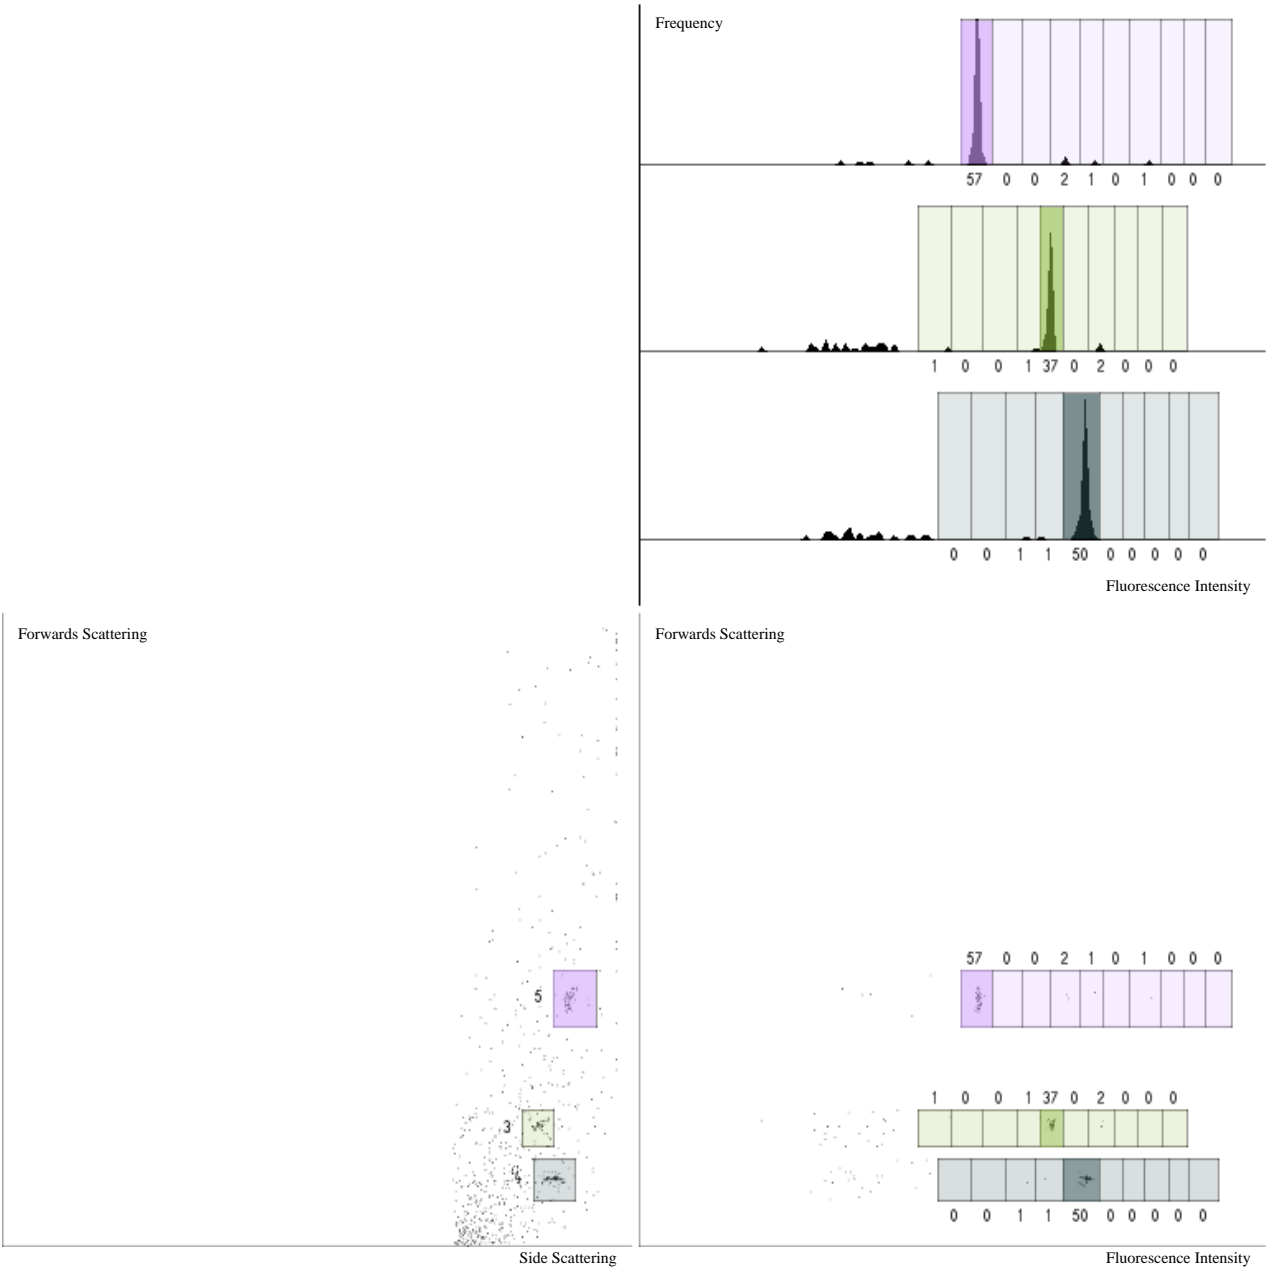

ANNEX 3: TAG DECONVOLUTION - BEAD 292

Passes flow sorting criteria: Yes  
Passes tag deconvolution criteria: No  
Included in protocol analysis: No  
Protocol: N/A  
Filename: Bin4\_plateA2\_D10.fcs  
Split 1: Petrol shading  
Split 2: Green shading  
Split 3: Violet shading

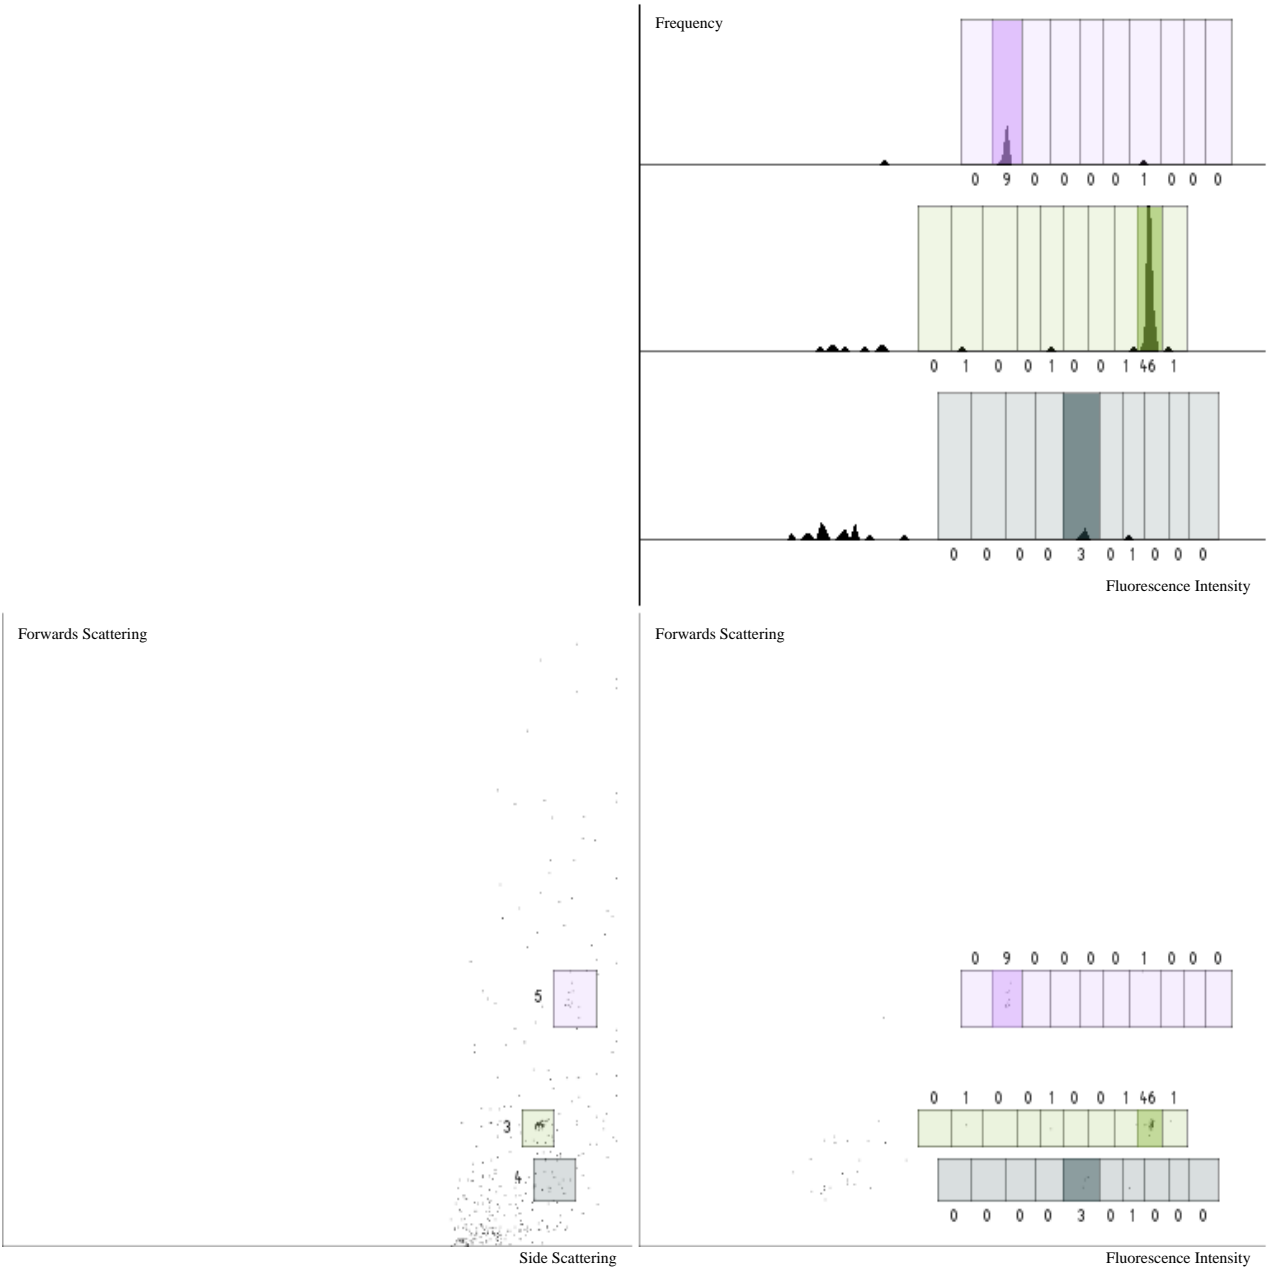

ANNEX 3: TAG DECONVOLUTION - BEAD 293

Passes flow sorting criteria: Yes  
Passes tag deconvolution criteria: No  
Included in protocol analysis: No  
Protocol: N/A  
Filename: Bin4\_plateA2\_D11.fcs  
Split 1: Petrol shading  
Split 2: Green shading  
Split 3: Violet shading

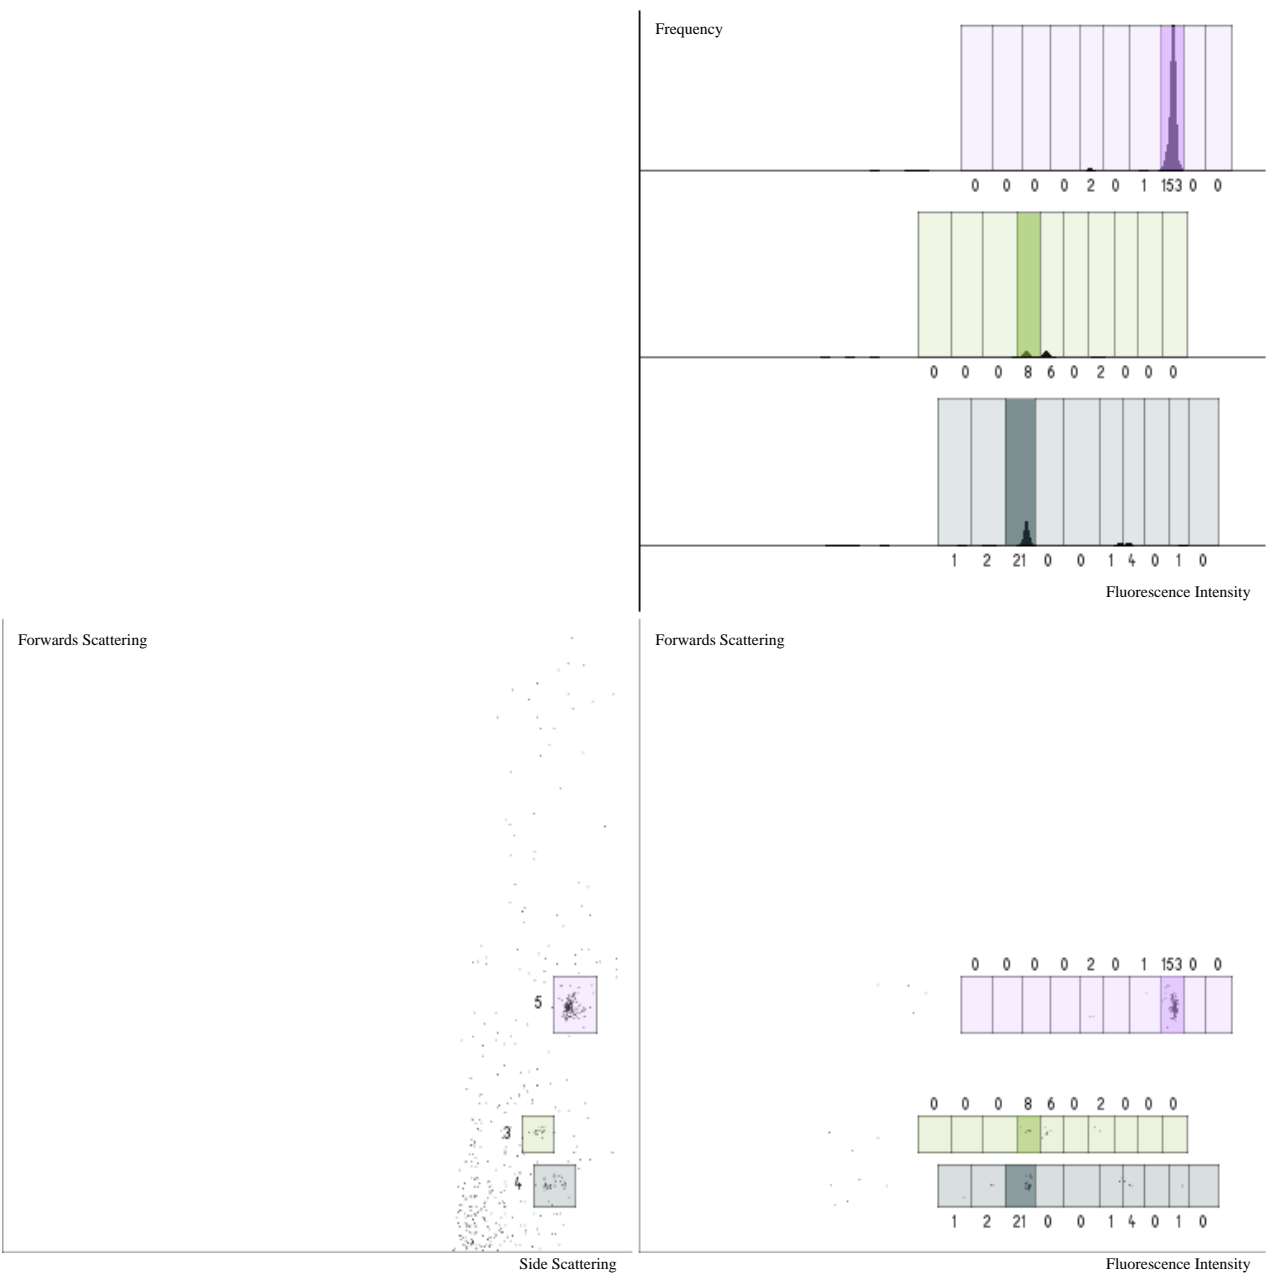

ANNEX 3: TAG DECONVOLUTION - BEAD 294

Passes flow sorting criteria: Yes  
Passes tag deconvolution criteria: Yes  
Included in protocol analysis: Yes  
Protocol: 5, 10, 6, 4  
Filename: Bin4\_plateA2\_D12.fcs  
Split 1: Petrol shading  
Split 2: Green shading  
Split 3: Violet shading

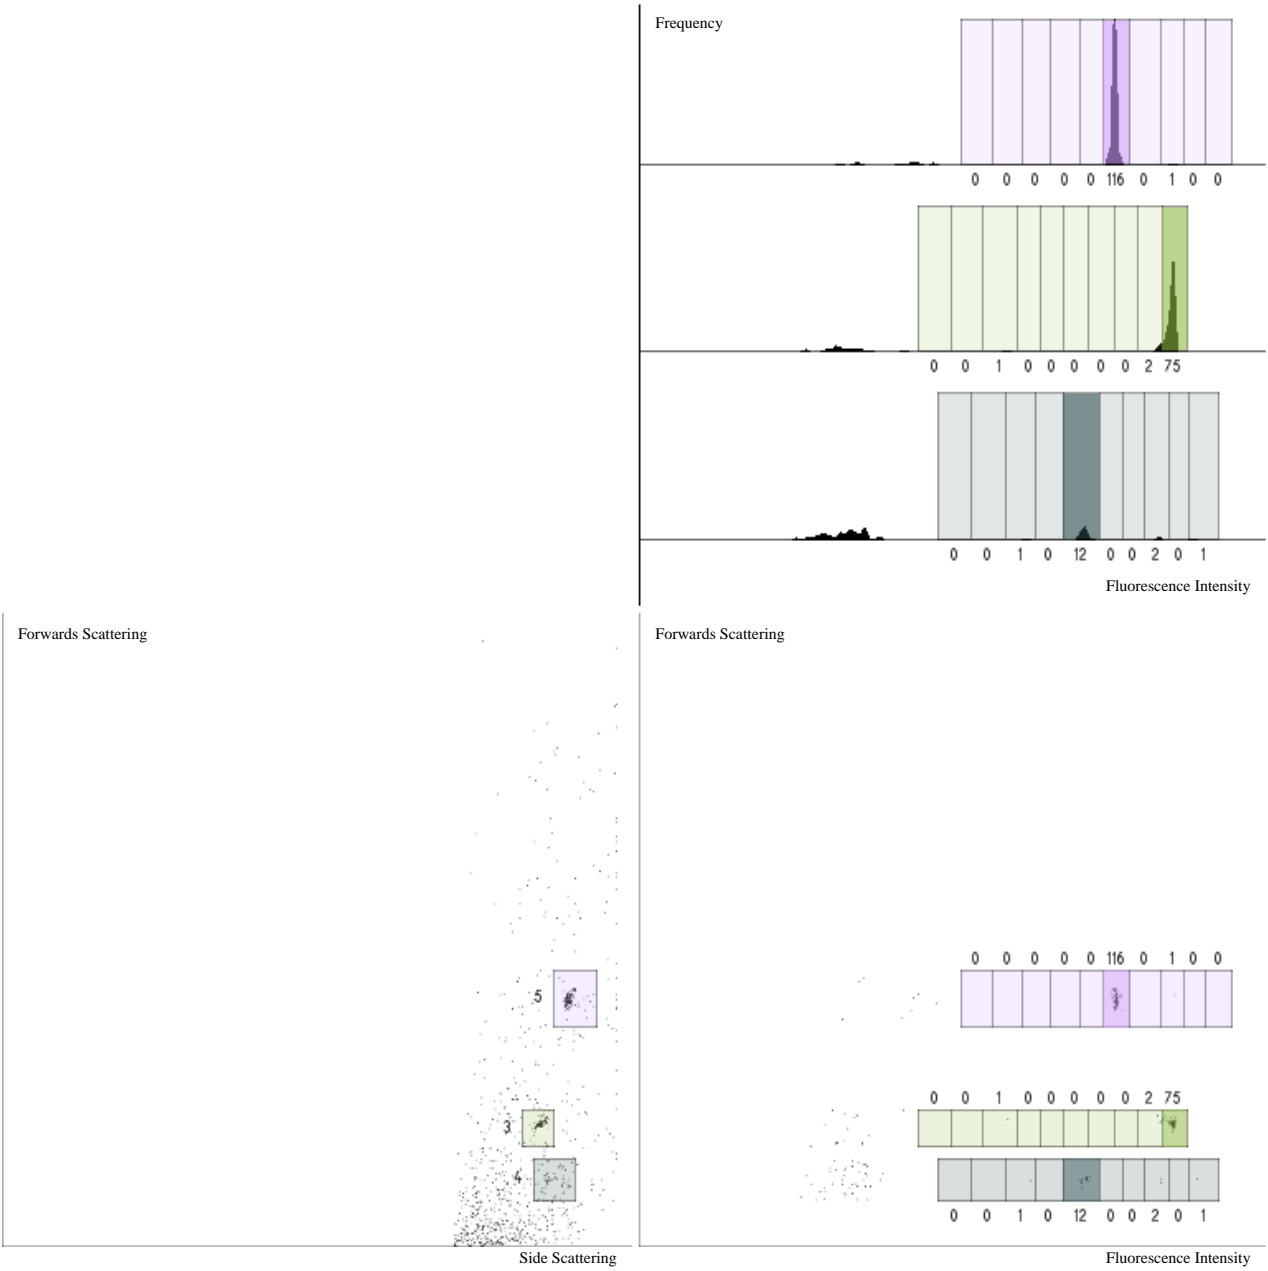



ANNEX 3: TAG DECONVOLUTION - BEAD 295

Passes flow sorting criteria: Yes  
Passes tag deconvolution criteria: Yes  
Included in protocol analysis: Yes  
Protocol: 10, 8, 8, 4  
Filename: Bin4\_plateA2\_E1.fcs  
Split 1: Petrol shading  
Split 2: Green shading  
Split 3: Violet shading

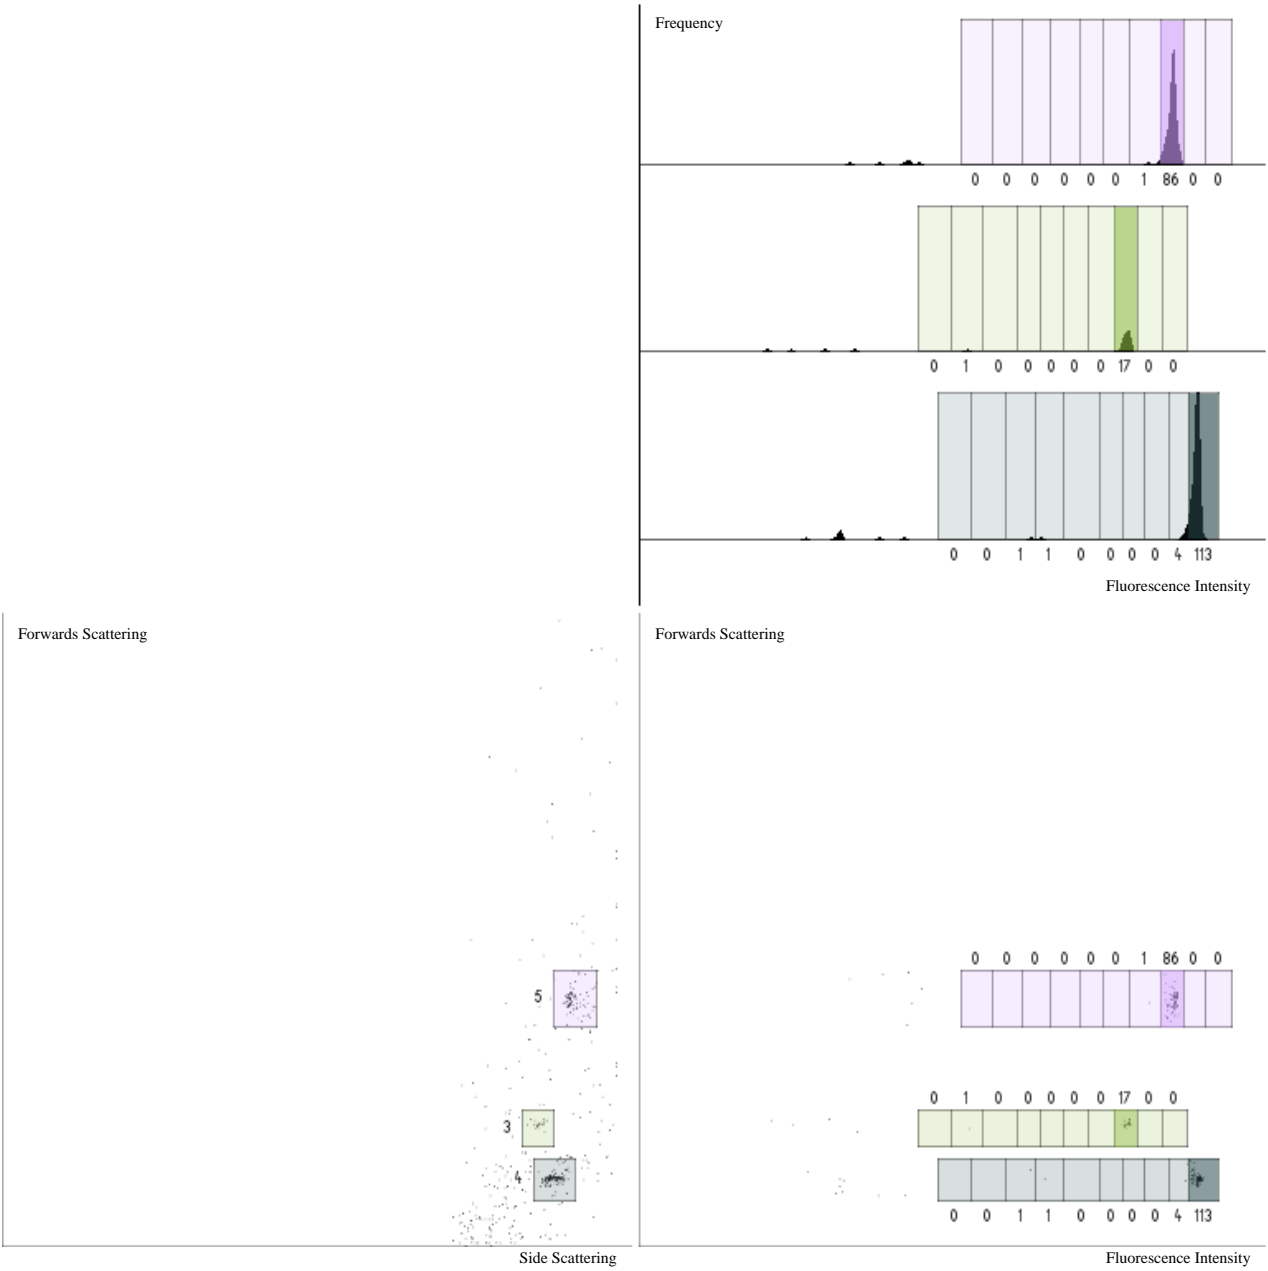

ANNEX 3: TAG DECONVOLUTION - BEAD 296

Passes flow sorting criteria: Yes  
Passes tag deconvolution criteria: No  
Included in protocol analysis: No  
Protocol: N/A  
Filename: Bin4\_plateA2\_E2.fcs  
Split 1: Petrol shading  
Split 2: Green shading  
Split 3: Violet shading

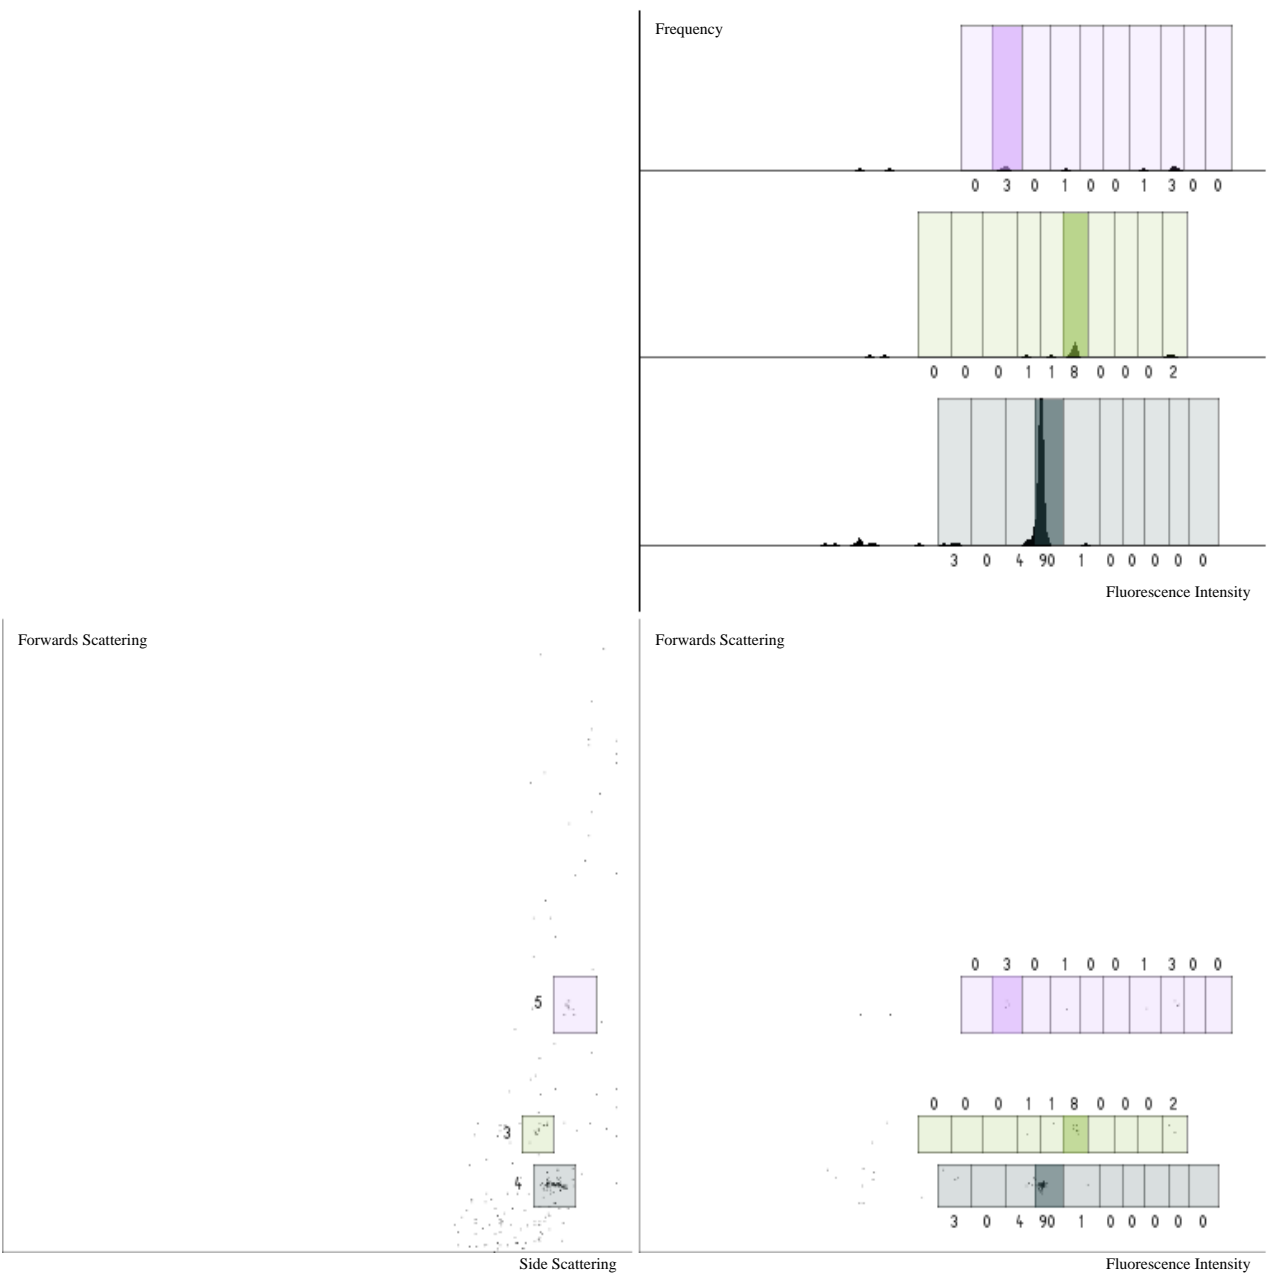

ANNEX 3: TAG DECONVOLUTION - BEAD 297

Passes flow sorting criteria: Yes  
Passes tag deconvolution criteria: No  
Included in protocol analysis: No  
Protocol: N/A  
Filename: Bin4\_plateA2\_E3.fcs  
Split 1: Petrol shading  
Split 2: Green shading  
Split 3: Violet shading

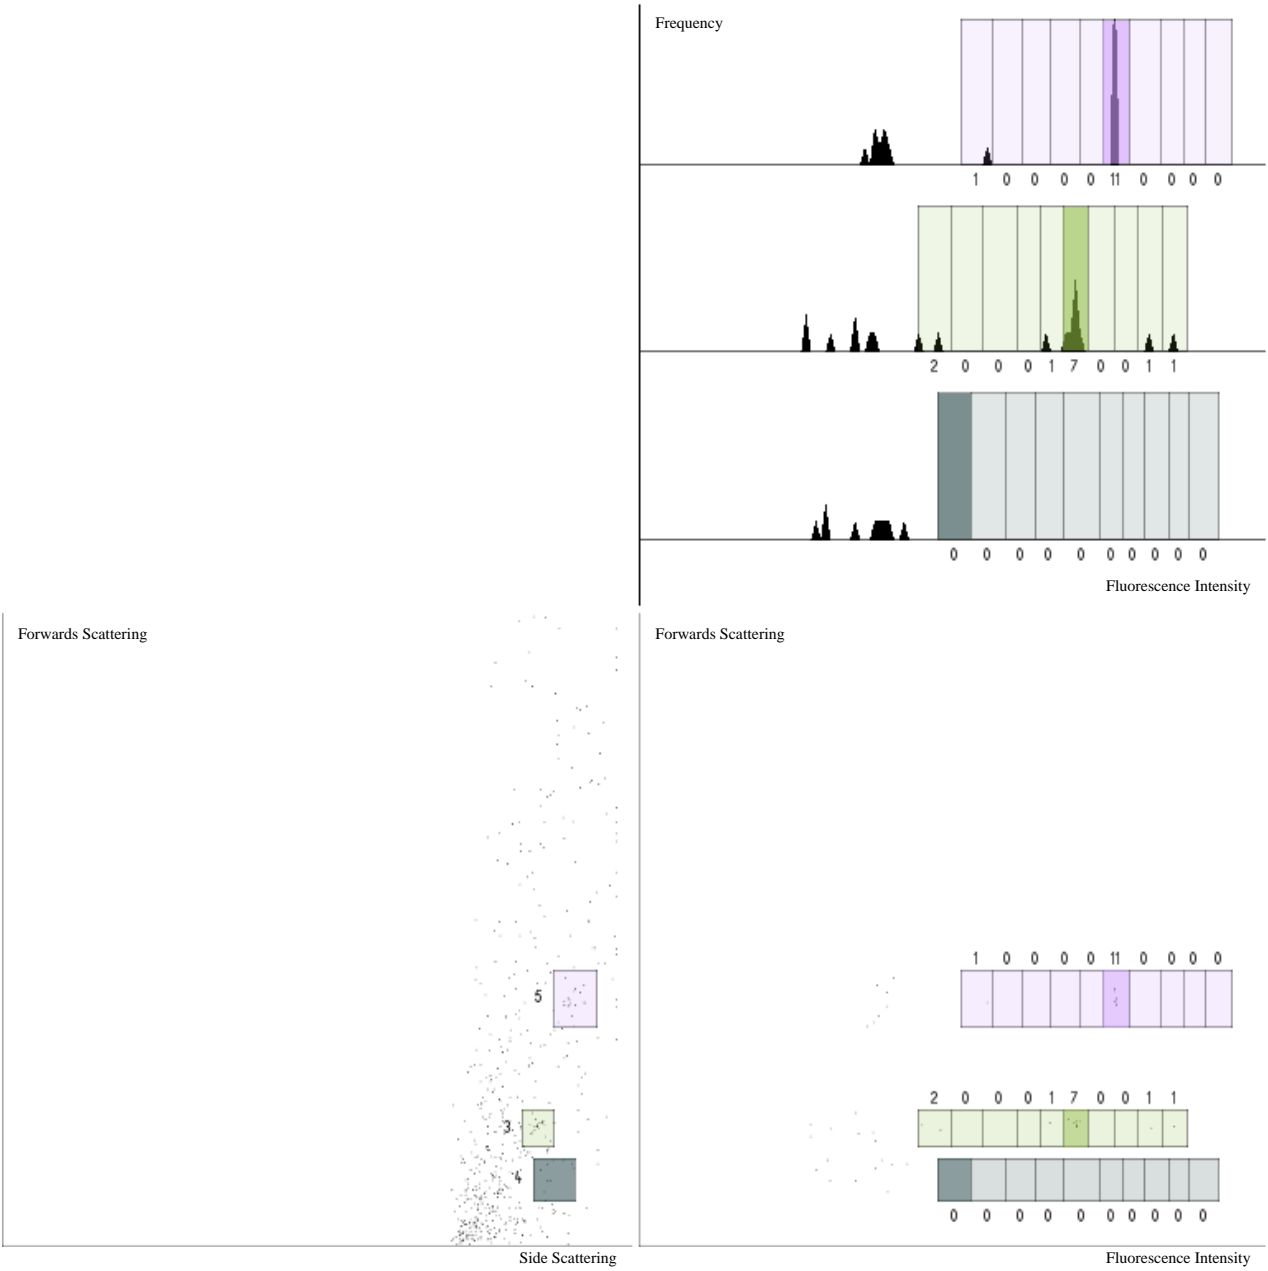

ANNEX 3: TAG DECONVOLUTION - BEAD 298

Passes flow sorting criteria: Yes  
Passes tag deconvolution criteria: Yes  
Included in protocol analysis: Yes  
Protocol: 1, 9, 5, 4  
Filename: Bin4\_plateA2\_E4.fcs  
Split 1: Petrol shading  
Split 2: Green shading  
Split 3: Violet shading

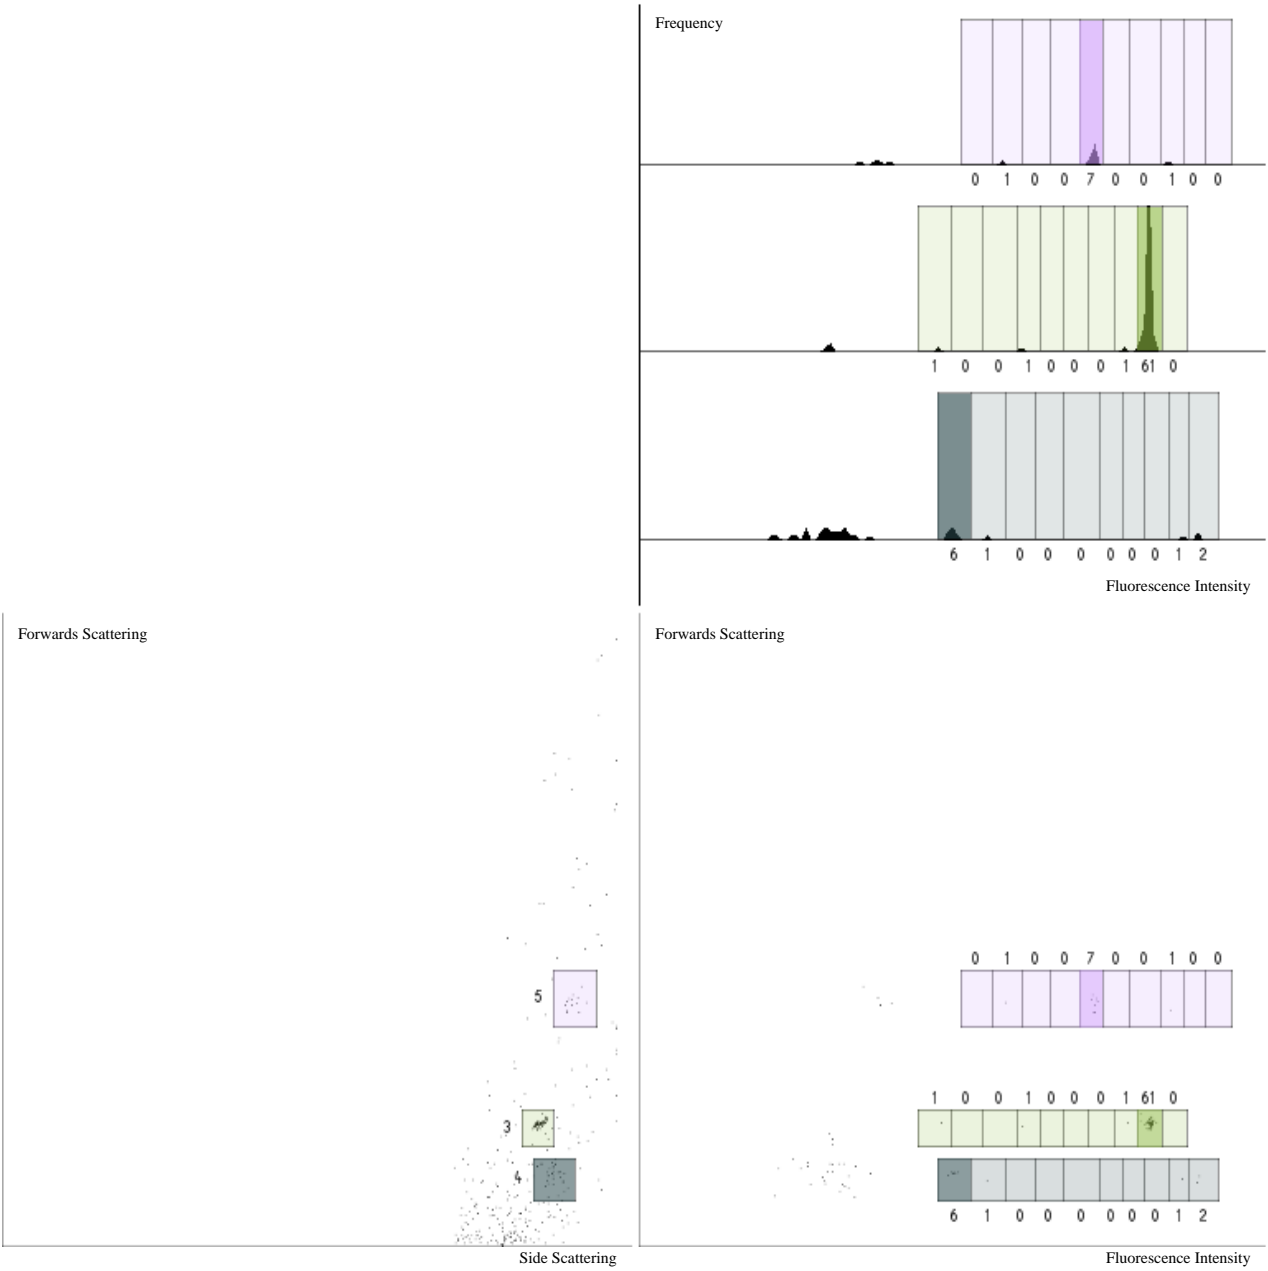

ANNEX 3: TAG DECONVOLUTION - BEAD 299

Passes flow sorting criteria: Yes  
Passes tag deconvolution criteria: Yes  
Included in protocol analysis: Yes  
Protocol: 1, 5, 2, 4  
Filename: Bin4\_plateA2\_E5.fcs  
Split 1: Petrol shading  
Split 2: Green shading  
Split 3: Violet shading

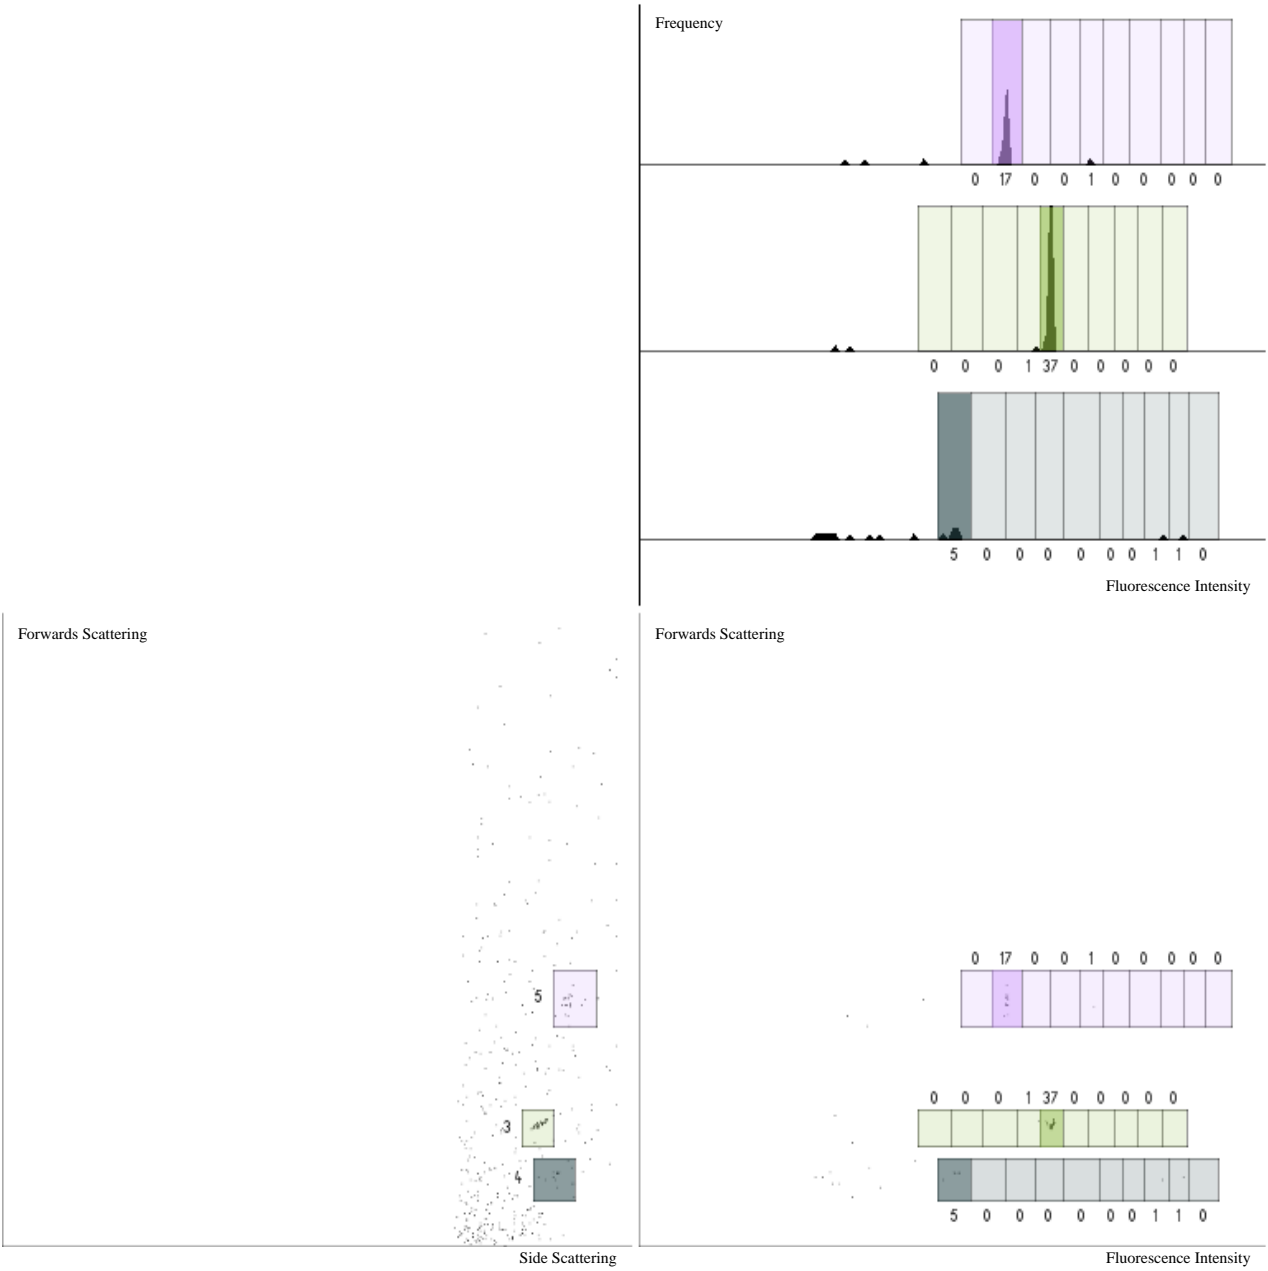

ANNEX 3: TAG DECONVOLUTION - BEAD 300

Passes flow sorting criteria: Yes  
Passes tag deconvolution criteria: No  
Included in protocol analysis: No  
Protocol: N/A  
Filename: Bin4\_plateA2\_E6.fcs  
Split 1: Petrol shading  
Split 2: Green shading  
Split 3: Violet shading

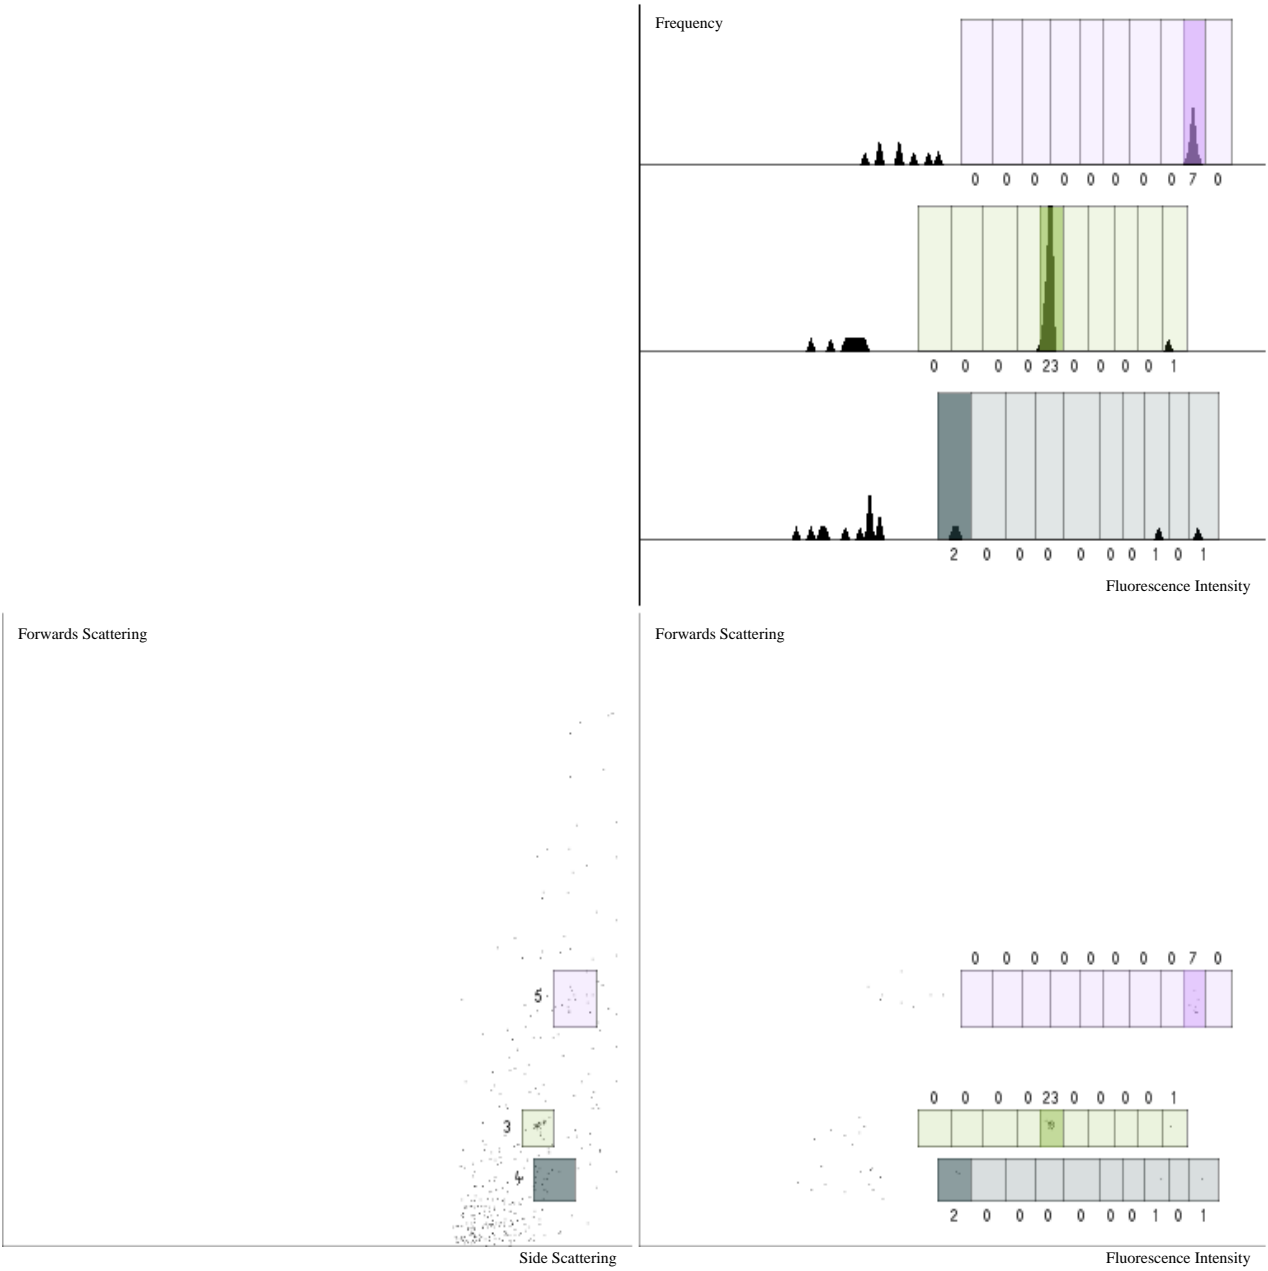

ANNEX 3: TAG DECONVOLUTION - BEAD 301

Passes flow sorting criteria: Yes  
Passes tag deconvolution criteria: Yes  
Included in protocol analysis: Yes  
Protocol: 2, 6, 7, 4  
Filename: Bin4\_plateA2\_E7.fcs  
Split 1: Petrol shading  
Split 2: Green shading  
Split 3: Violet shading

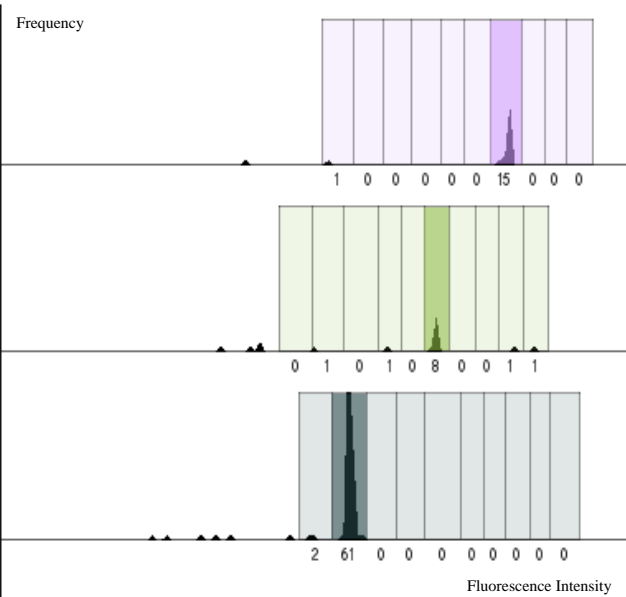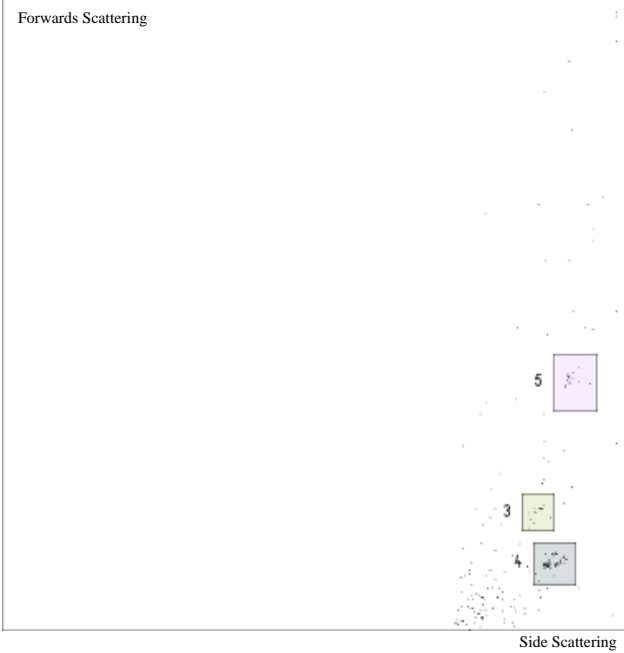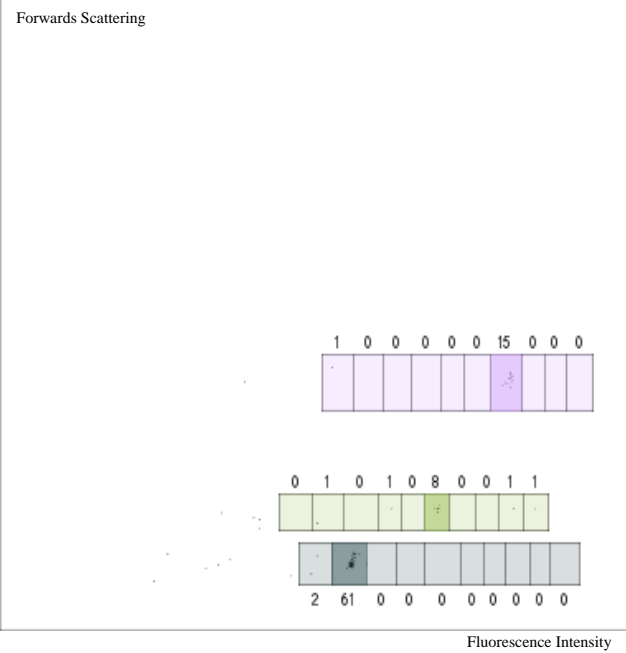

ANNEX 3: TAG DECONVOLUTION - BEAD 302

Passes flow sorting criteria: Yes  
Passes tag deconvolution criteria: No  
Included in protocol analysis: No  
Protocol: N/A  
Filename: Bin4\_plateA2\_G12.fcs  
Split 1: Petrol shading  
Split 2: Green shading  
Split 3: Violet shading

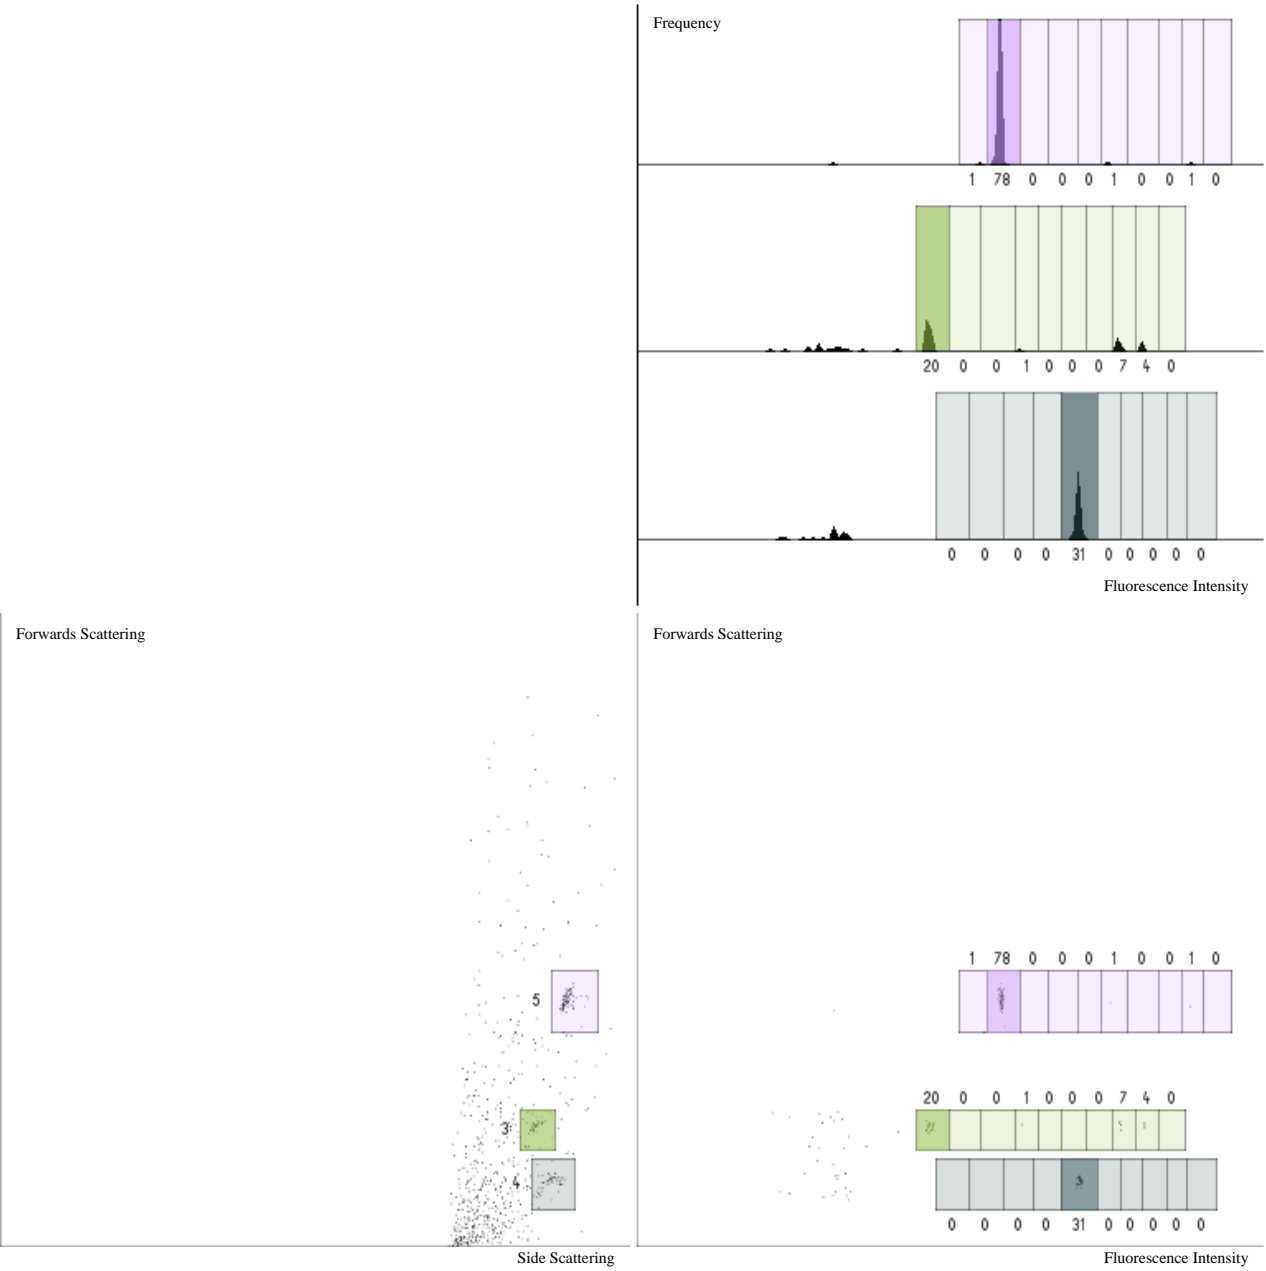



ANNEX 3: TAG DECONVOLUTION - BEAD 303

Passes flow sorting criteria: Yes  
Passes tag deconvolution criteria: Yes  
Included in protocol analysis: Yes  
Protocol: 6, 10, 10, 4  
Filename: Bin4\_plateA2\_E9.fcs  
Split 1: Petrol shading  
Split 2: Green shading  
Split 3: Violet shading

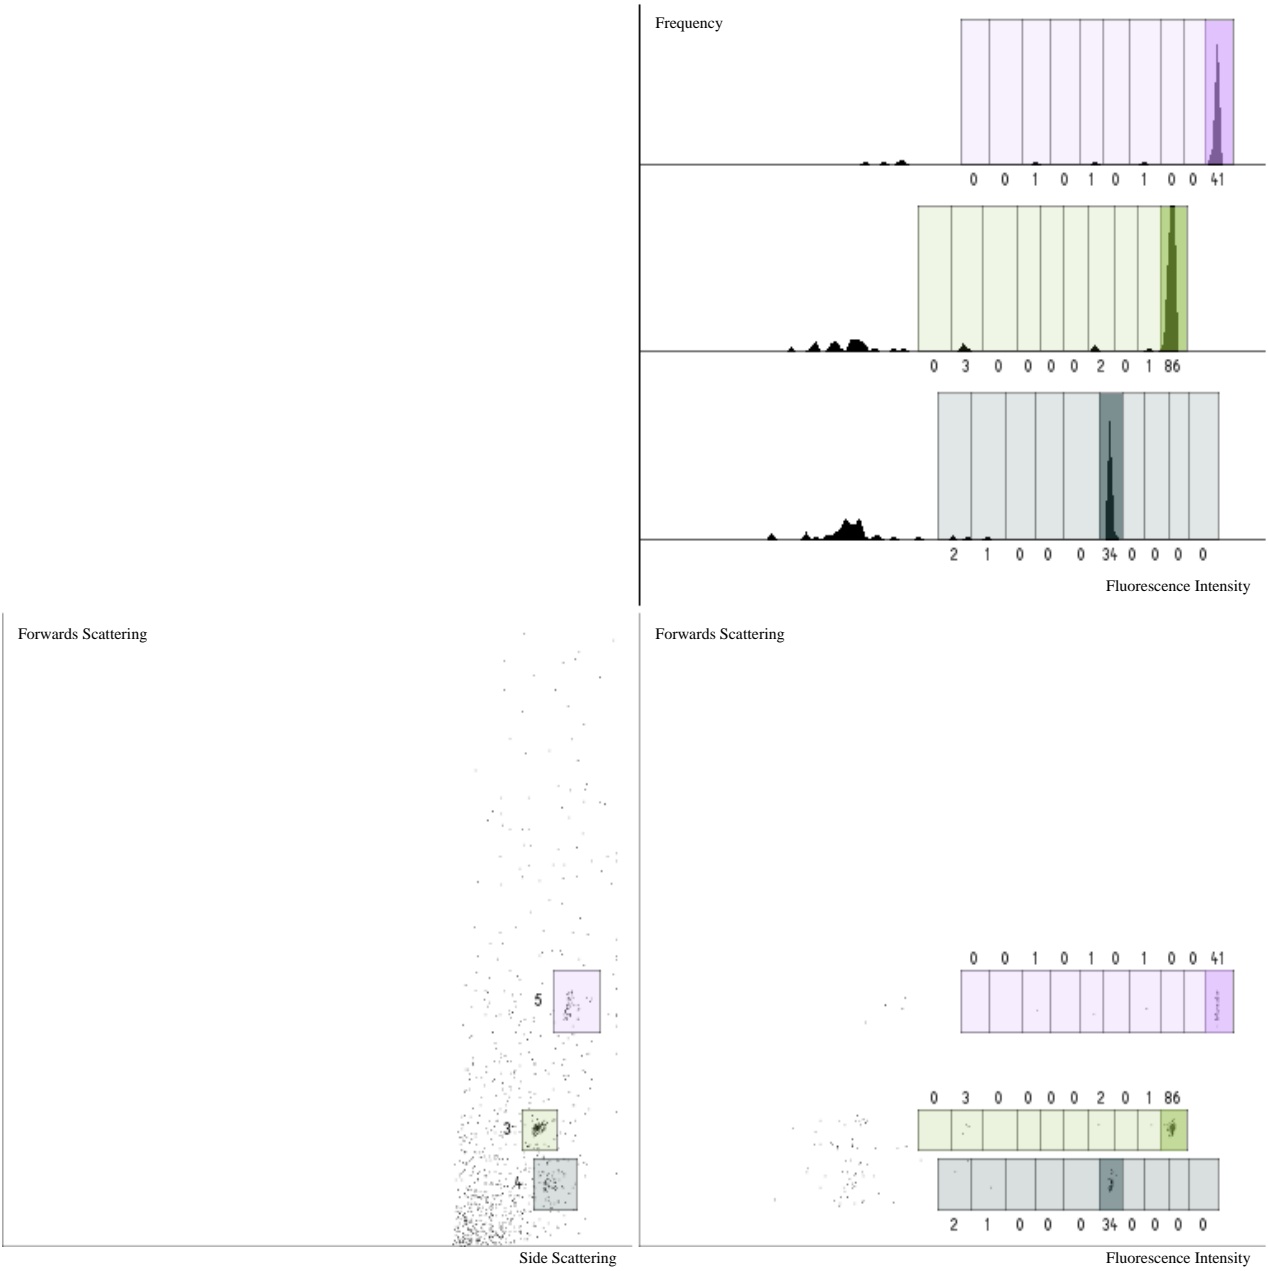

ANNEX 3: TAG DECONVOLUTION - BEAD 304

Passes flow sorting criteria: Yes  
Passes tag deconvolution criteria: Yes  
Included in protocol analysis: Yes  
Protocol: 4, 5, 6, 4  
Filename: Bin4\_plateA2\_E10.fcs  
Split 1: Petrol shading  
Split 2: Green shading  
Split 3: Violet shading

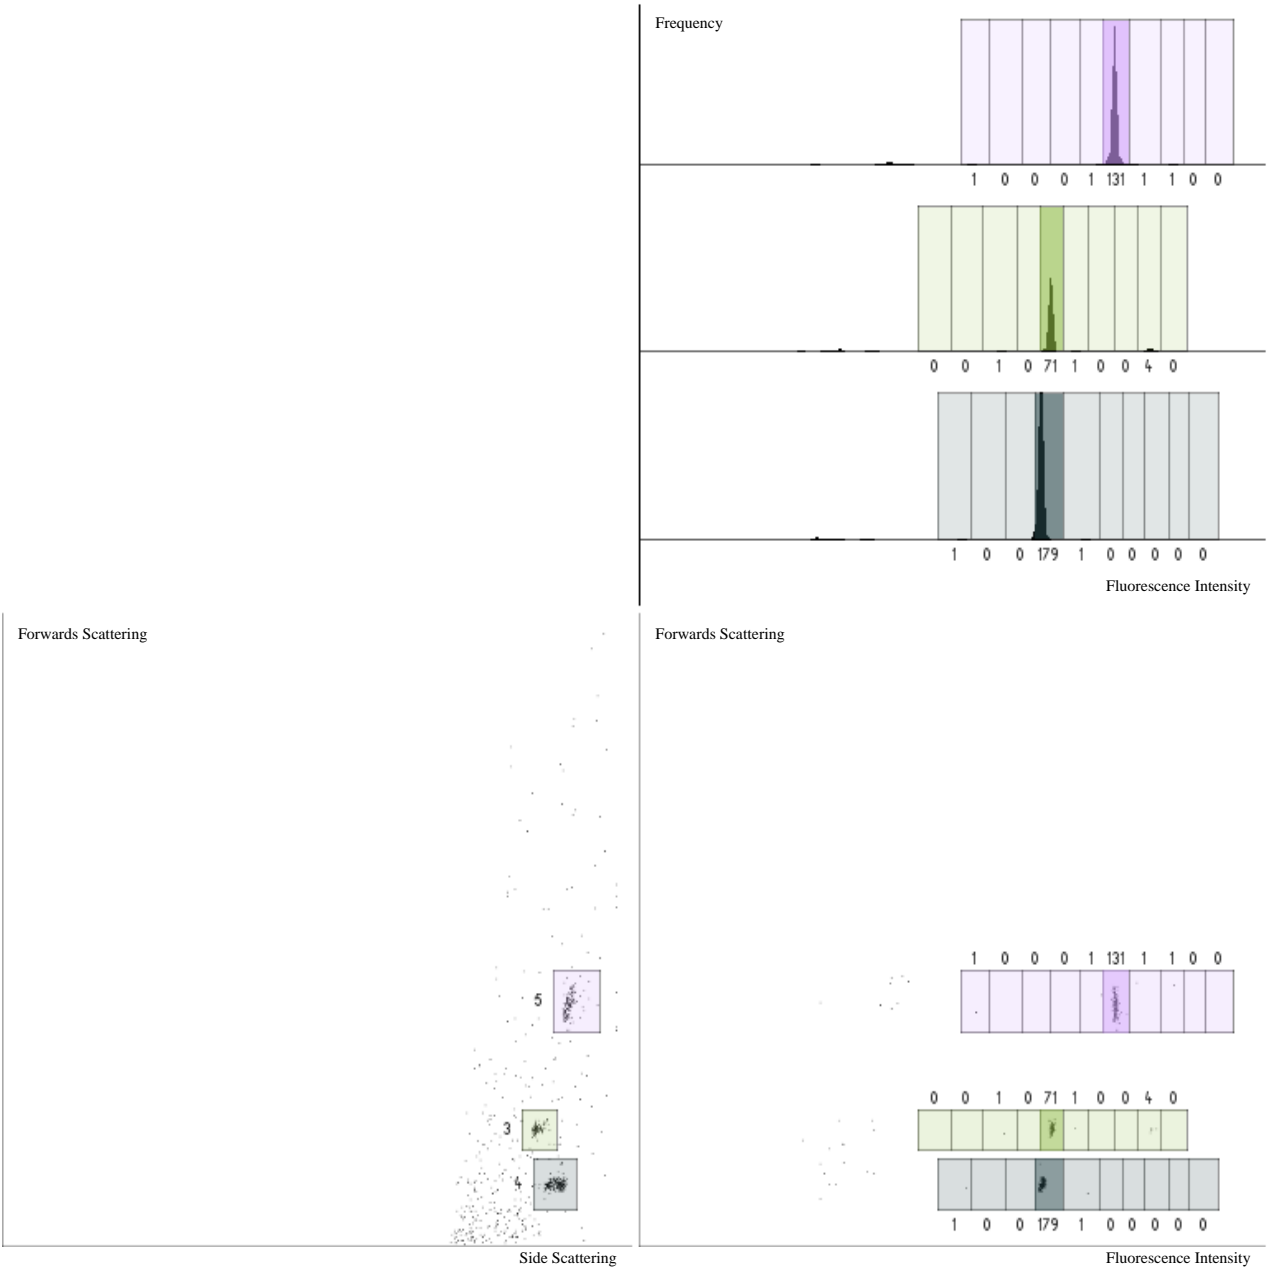

ANNEX 3: TAG DECONVOLUTION - BEAD 305

Passes flow sorting criteria: Yes  
Passes tag deconvolution criteria: Yes  
Included in protocol analysis: Yes  
Protocol: 1, 8, 6, 4  
Filename: Bin4\_plateA2\_E11.fcs  
Split 1: Petrol shading  
Split 2: Green shading  
Split 3: Violet shading

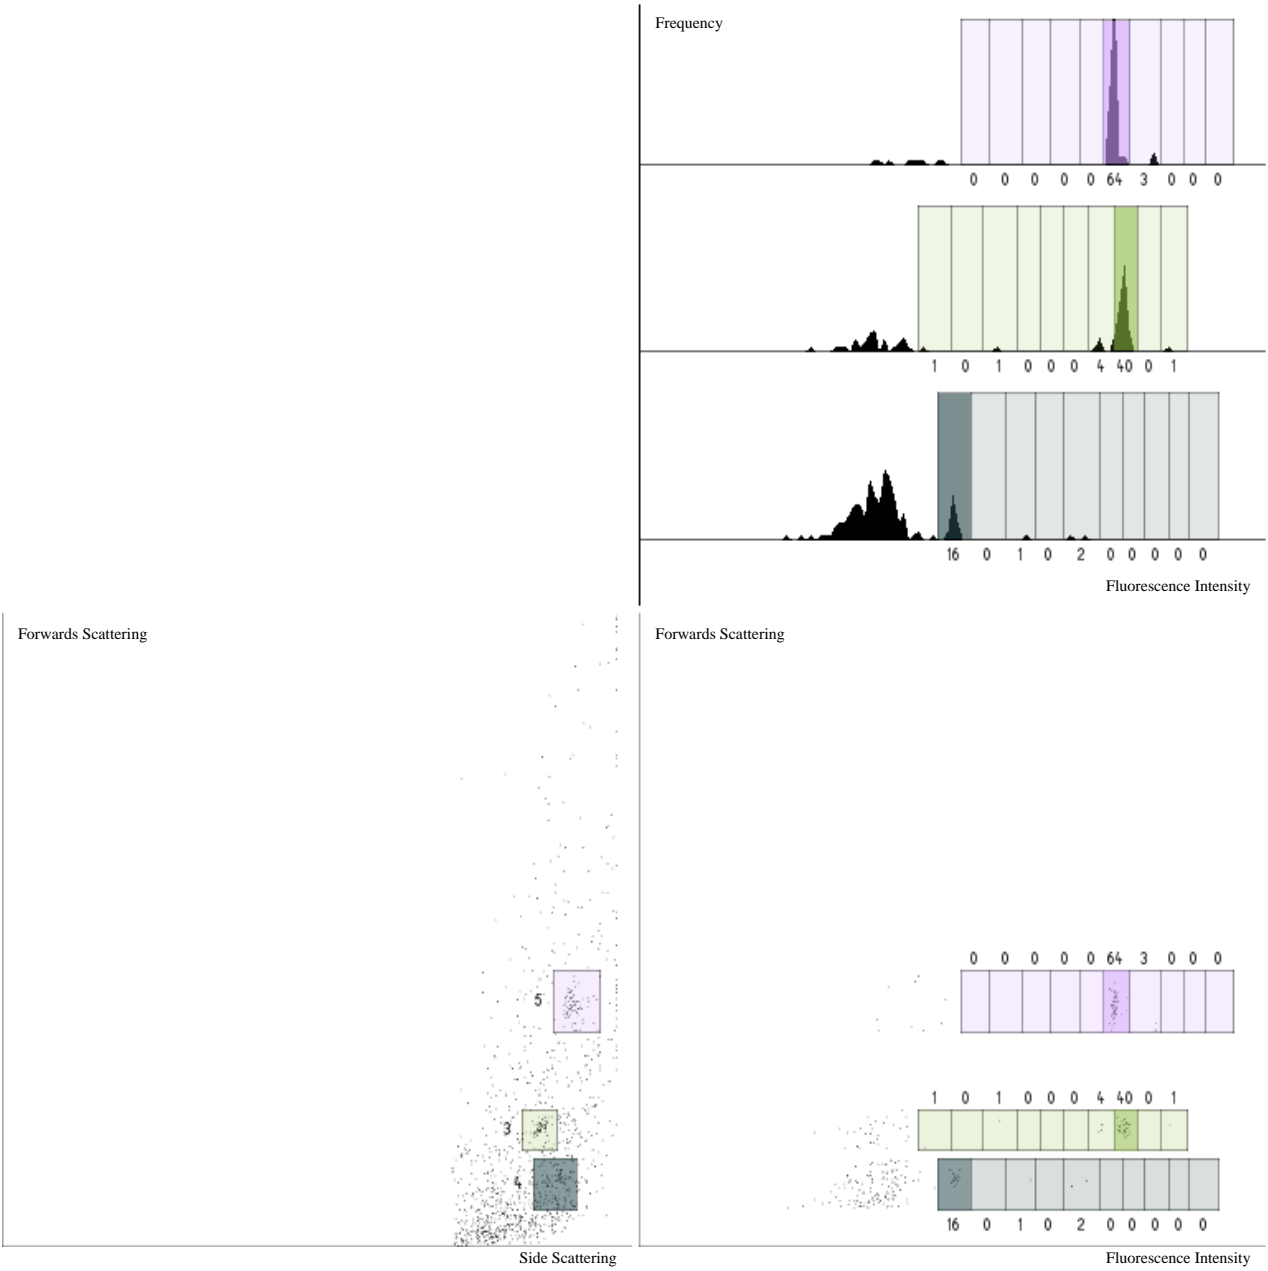

ANNEX 3: TAG DECONVOLUTION - BEAD 306

Passes flow sorting criteria: Yes  
Passes tag deconvolution criteria: Yes  
Included in protocol analysis: Yes  
Protocol: 7, 6, 6, 4  
Filename: Bin4\_plateA2\_E12.fcs  
Split 1: Petrol shading  
Split 2: Green shading  
Split 3: Violet shading

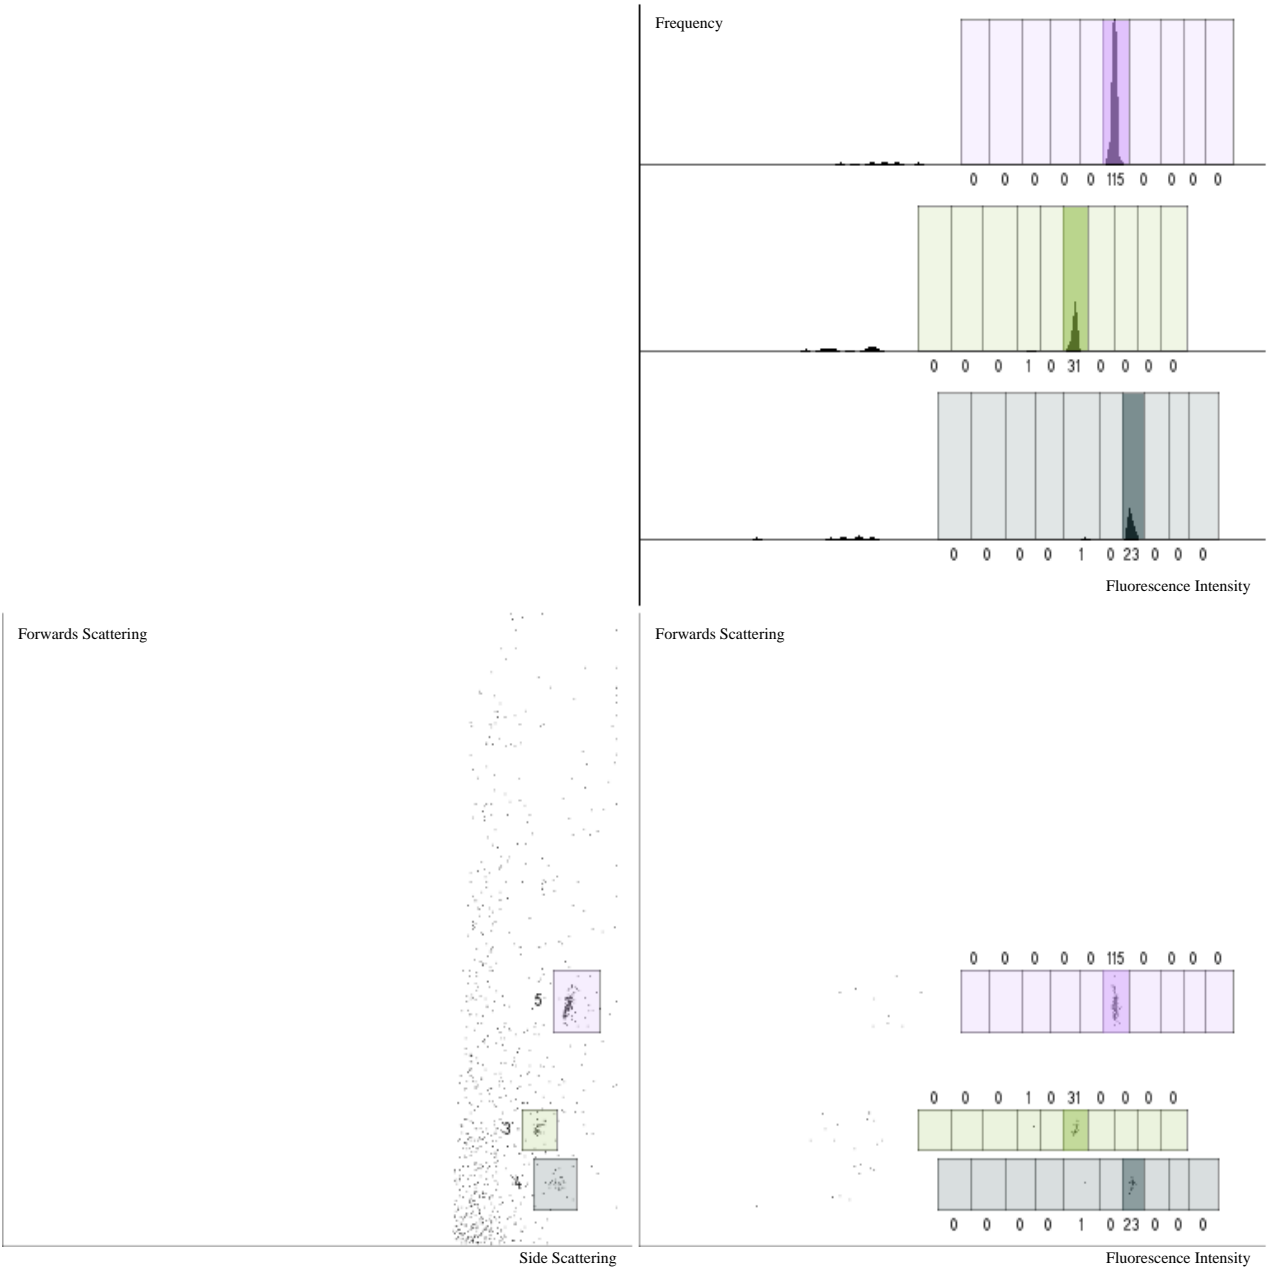

ANNEX 3: TAG DECONVOLUTION - BEAD 307

Passes flow sorting criteria: Yes  
Passes tag deconvolution criteria: Yes  
Included in protocol analysis: Yes  
Protocol: 9, 9, 10, 4  
Filename: Bin4\_plateA2\_F1.fcs  
Split 1: Petrol shading  
Split 2: Green shading  
Split 3: Violet shading

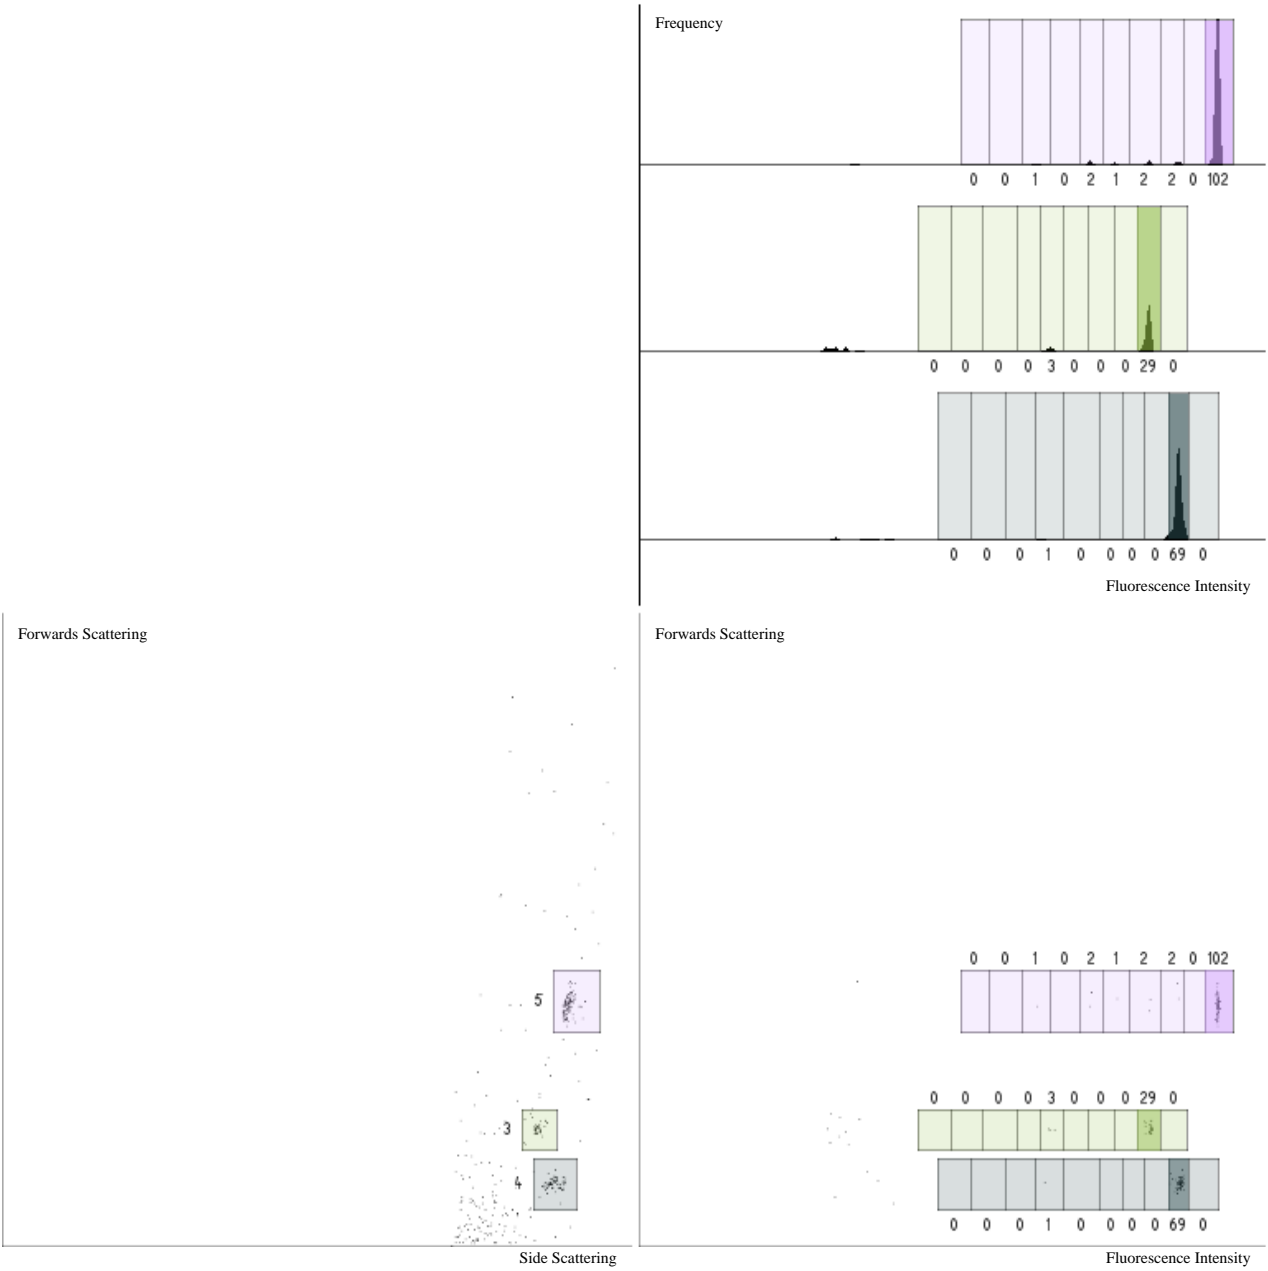

ANNEX 3: TAG DECONVOLUTION - BEAD 308

Passes flow sorting criteria: Yes  
Passes tag deconvolution criteria: Yes  
Included in protocol analysis: Yes  
Protocol: 10, 5, 9, 4  
Filename: Bin4\_plateA2\_F2.fcs  
Split 1: Petrol shading  
Split 2: Green shading  
Split 3: Violet shading

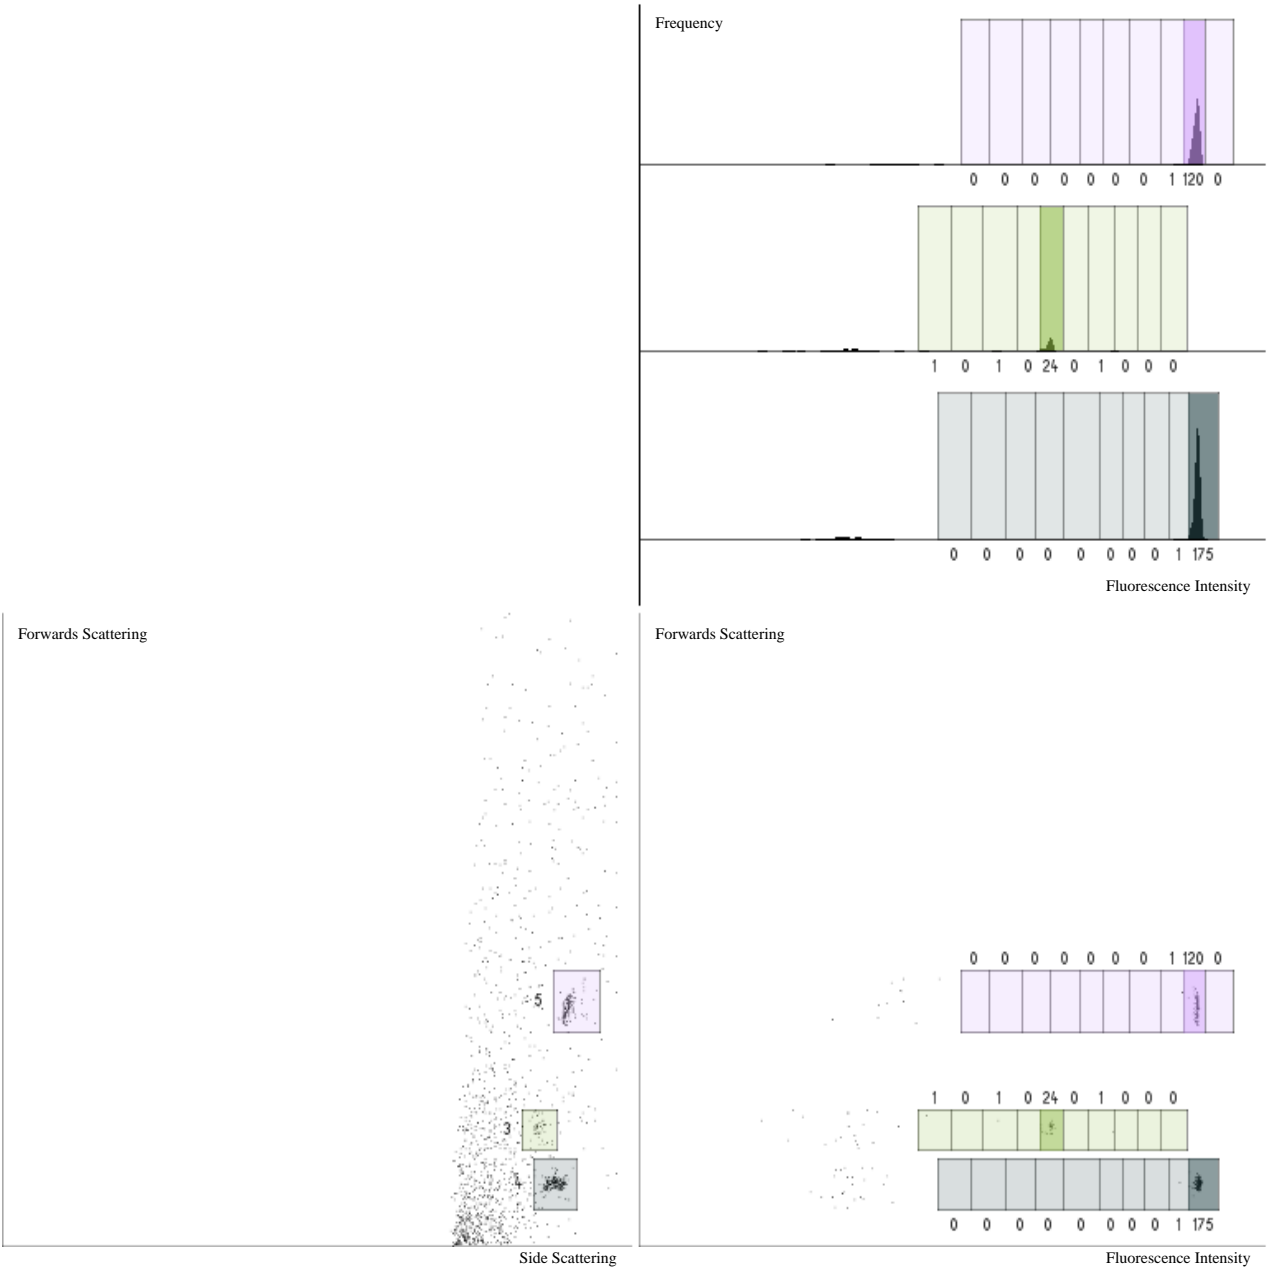

ANNEX 3: TAG DECONVOLUTION - BEAD 309

Passes flow sorting criteria: Yes  
Passes tag deconvolution criteria: Yes  
Included in protocol analysis: Yes  
Protocol: 3, 10, 10, 4  
Filename: Bin4\_plateA2\_F3.fcs  
Split 1: Petrol shading  
Split 2: Green shading  
Split 3: Violet shading

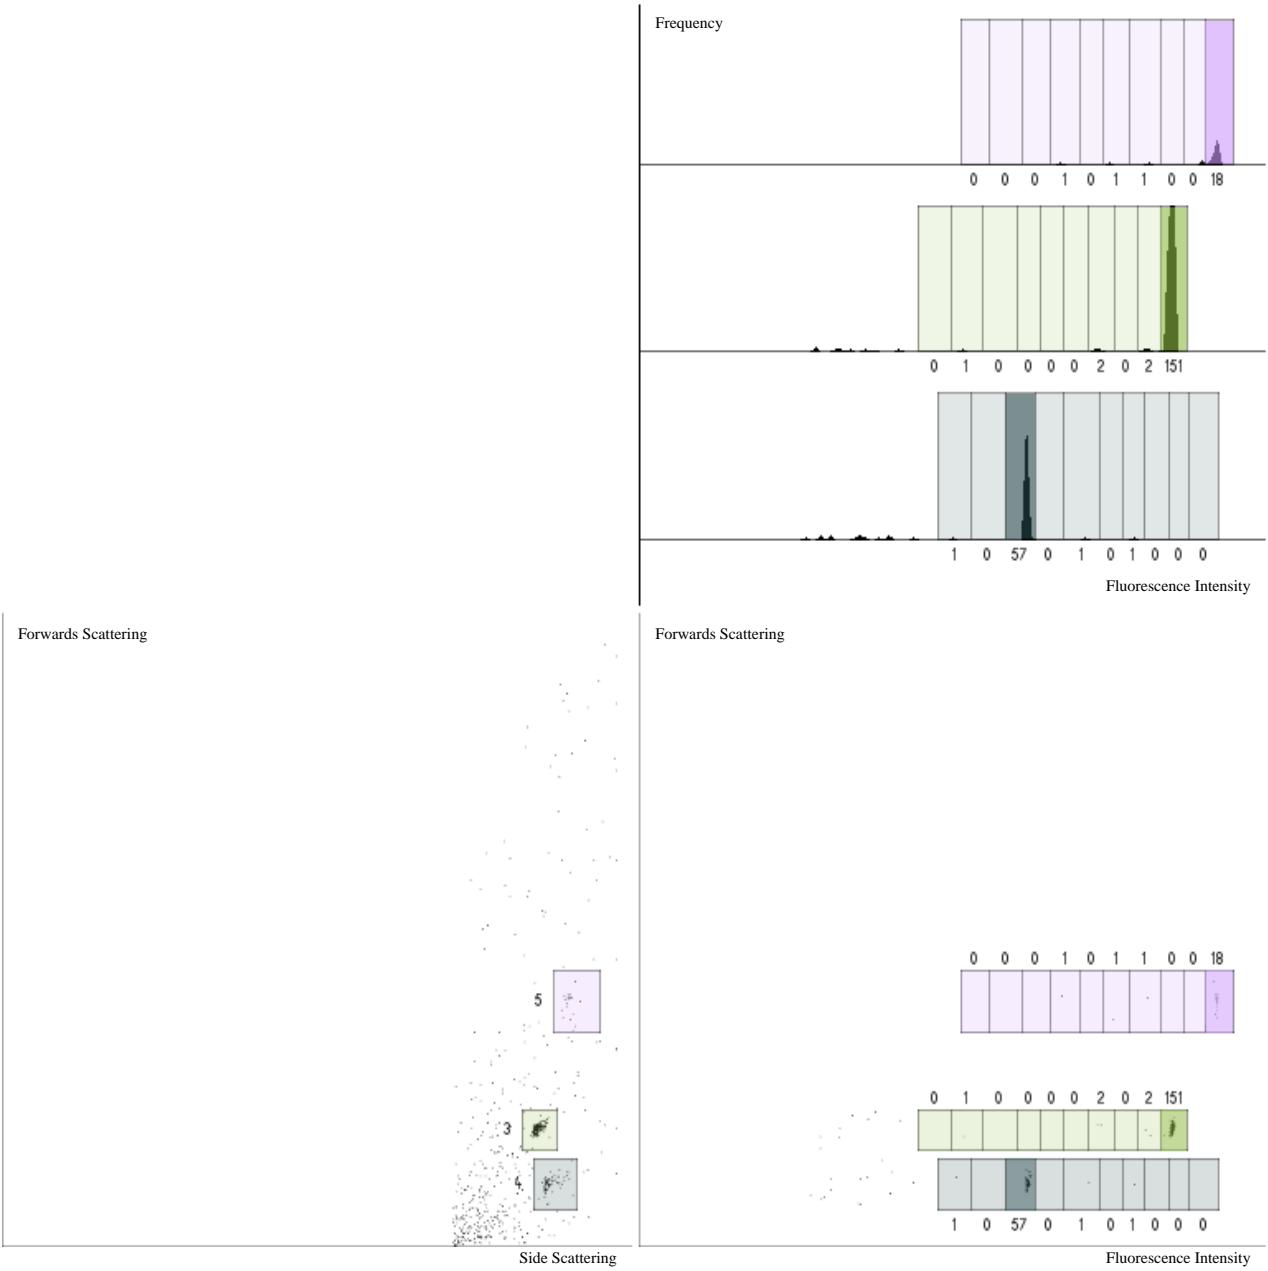

ANNEX 3: TAG DECONVOLUTION - BEAD 310

Passes flow sorting criteria: Yes  
Passes tag deconvolution criteria: Yes  
Included in protocol analysis: Yes  
Protocol: 1, 5, 9, 4  
Filename: Bin4\_plateA2\_F4.fcs  
Split 1: Petrol shading  
Split 2: Green shading  
Split 3: Violet shading

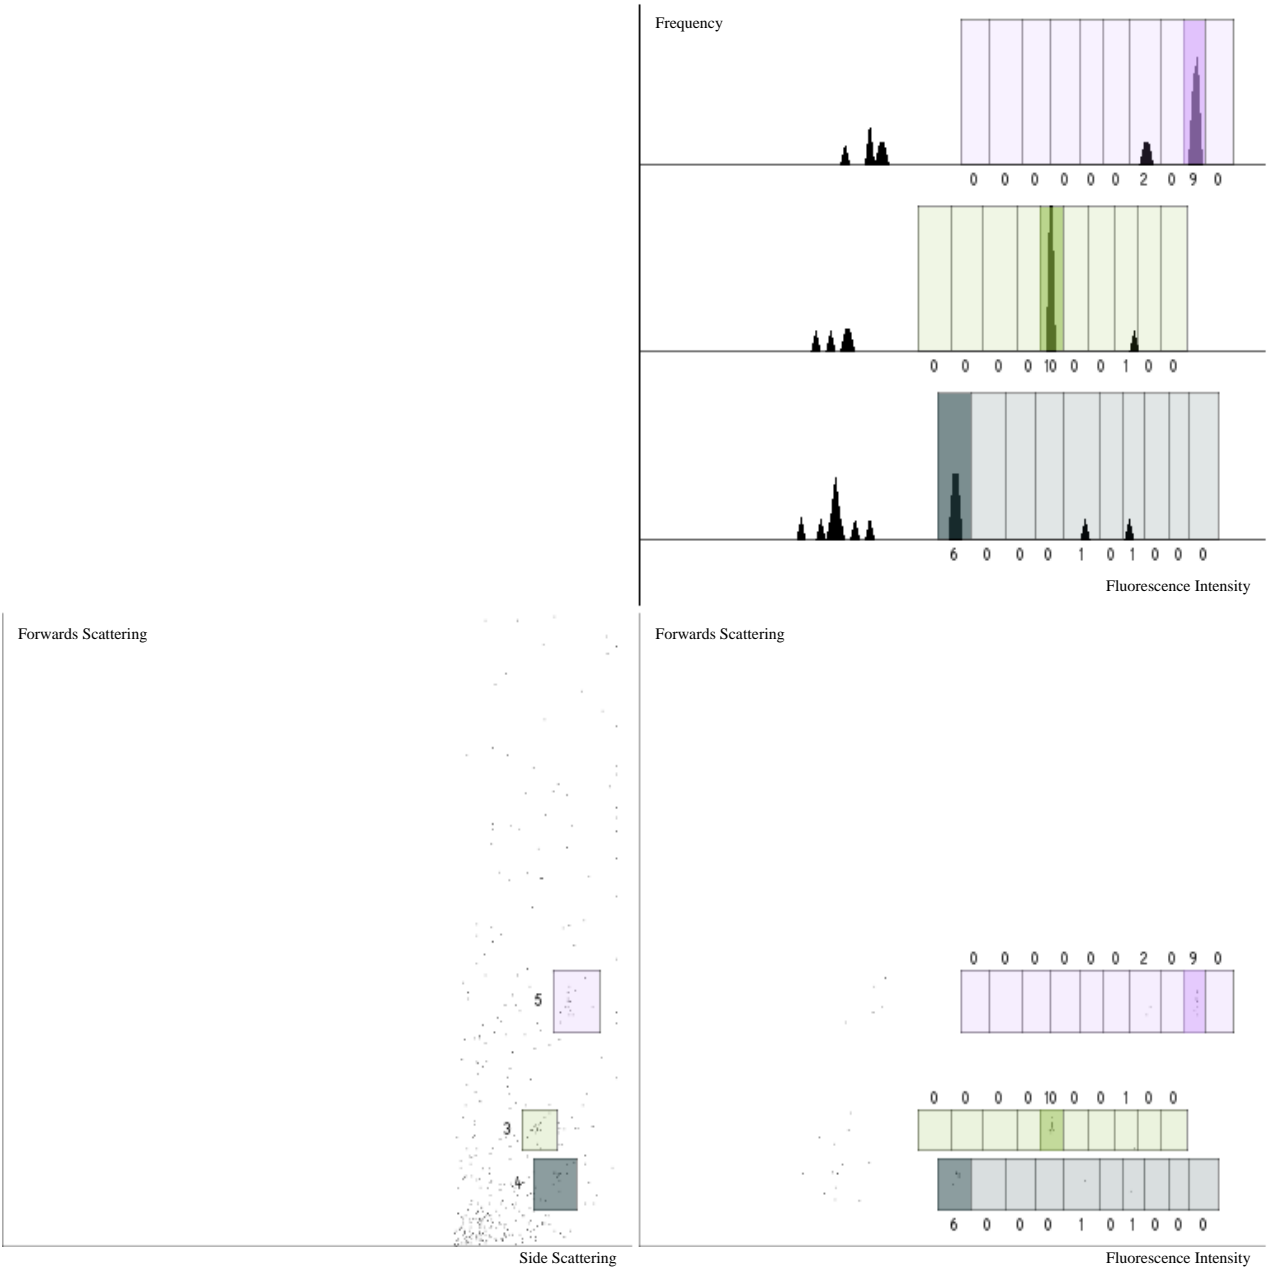



ANNEX 3: TAG DECONVOLUTION - BEAD 311

Passes flow sorting criteria: Yes  
Passes tag deconvolution criteria: No  
Included in protocol analysis: No  
Protocol: N/A  
Filename: Bin4\_plateA2\_F5.fcs  
Split 1: Petrol shading  
Split 2: Green shading  
Split 3: Violet shading

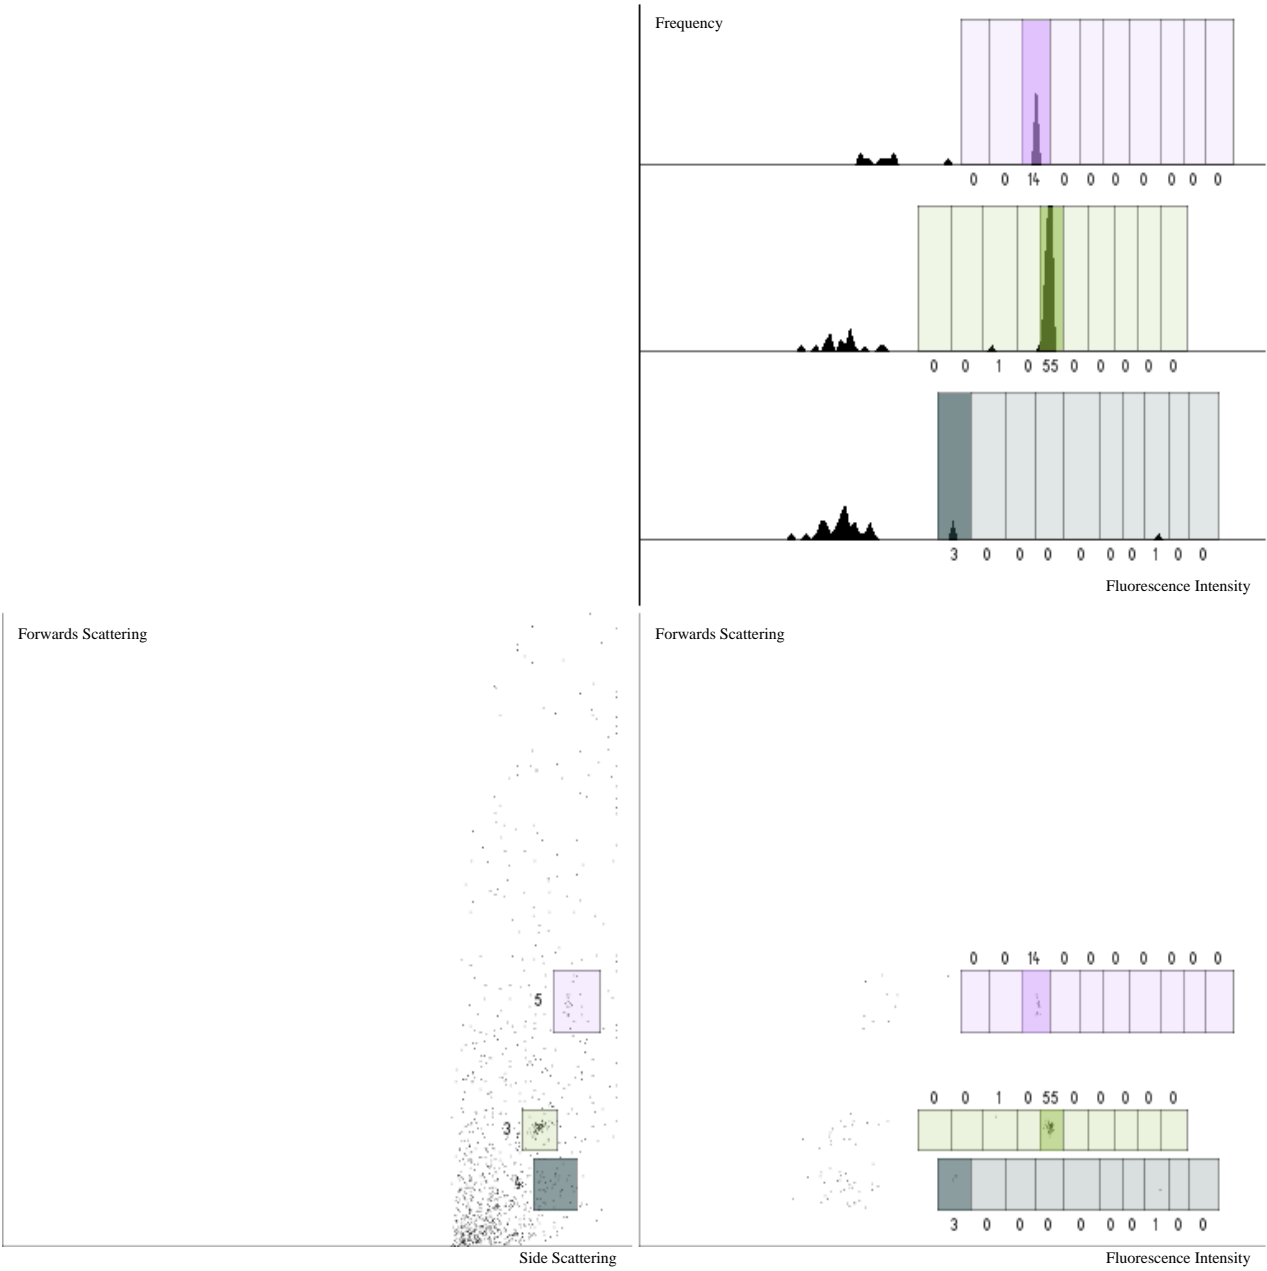

ANNEX 3: TAG DECONVOLUTION - BEAD 312

Passes flow sorting criteria: Yes  
Passes tag deconvolution criteria: Yes  
Included in protocol analysis: Yes  
Protocol: 1, 10, 7, 4  
Filename: Bin4\_plateA2\_F6.fcs  
Split 1: Petrol shading  
Split 2: Green shading  
Split 3: Violet shading

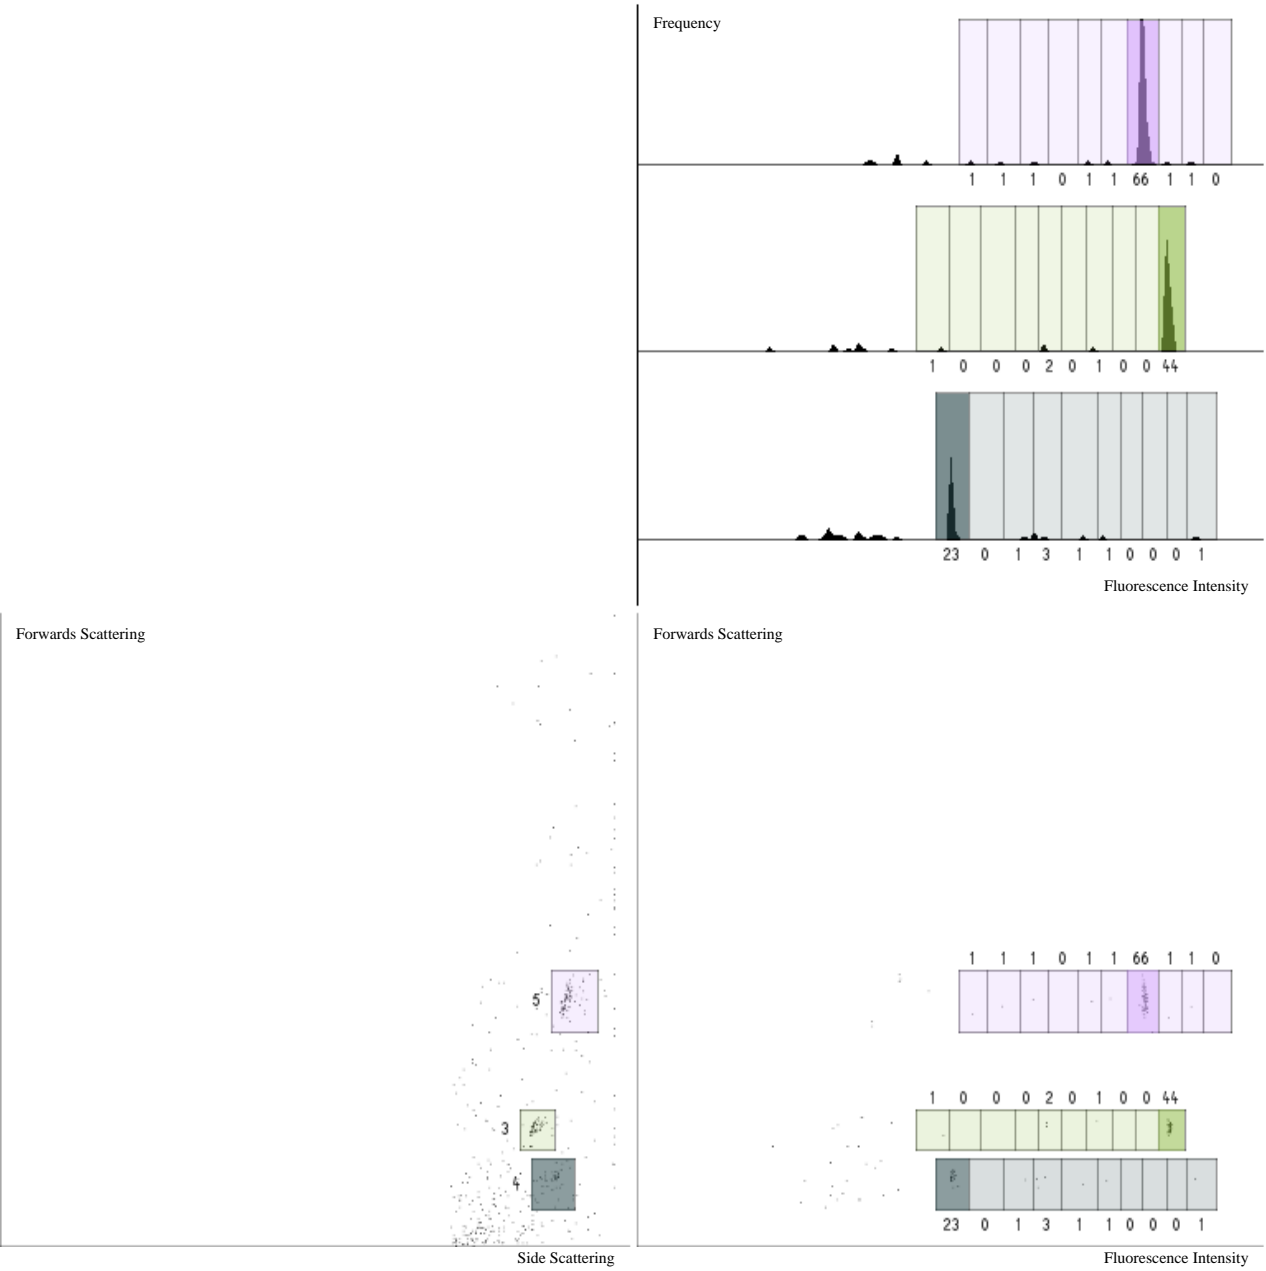

ANNEX 3: TAG DECONVOLUTION - BEAD 313

Passes flow sorting criteria: Yes  
Passes tag deconvolution criteria: No  
Included in protocol analysis: No  
Protocol: N/A  
Filename: Bin4\_plateA2\_F7.fcs  
Split 1: Petrol shading  
Split 2: Green shading  
Split 3: Violet shading

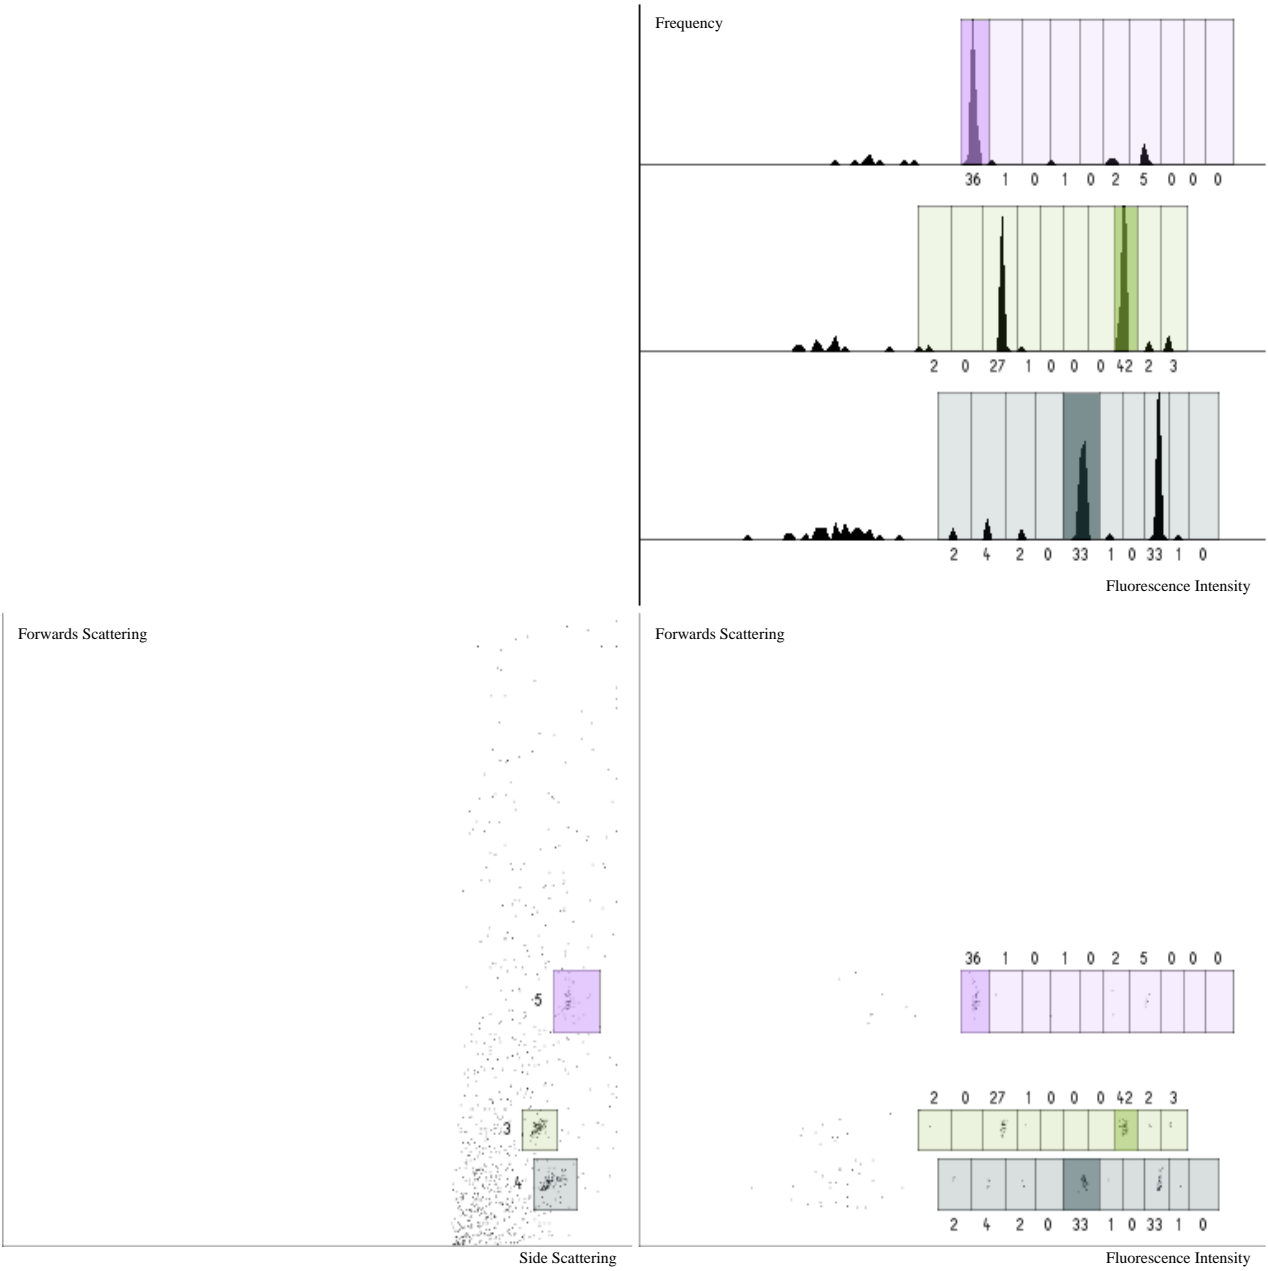

ANNEX 3: TAG DECONVOLUTION - BEAD 314

Passes flow sorting criteria: Yes  
Passes tag deconvolution criteria: No  
Included in protocol analysis: No  
Protocol: N/A  
Filename: Bin4\_plateA2\_F8.fcs  
Split 1: Petrol shading  
Split 2: Green shading  
Split 3: Violet shading

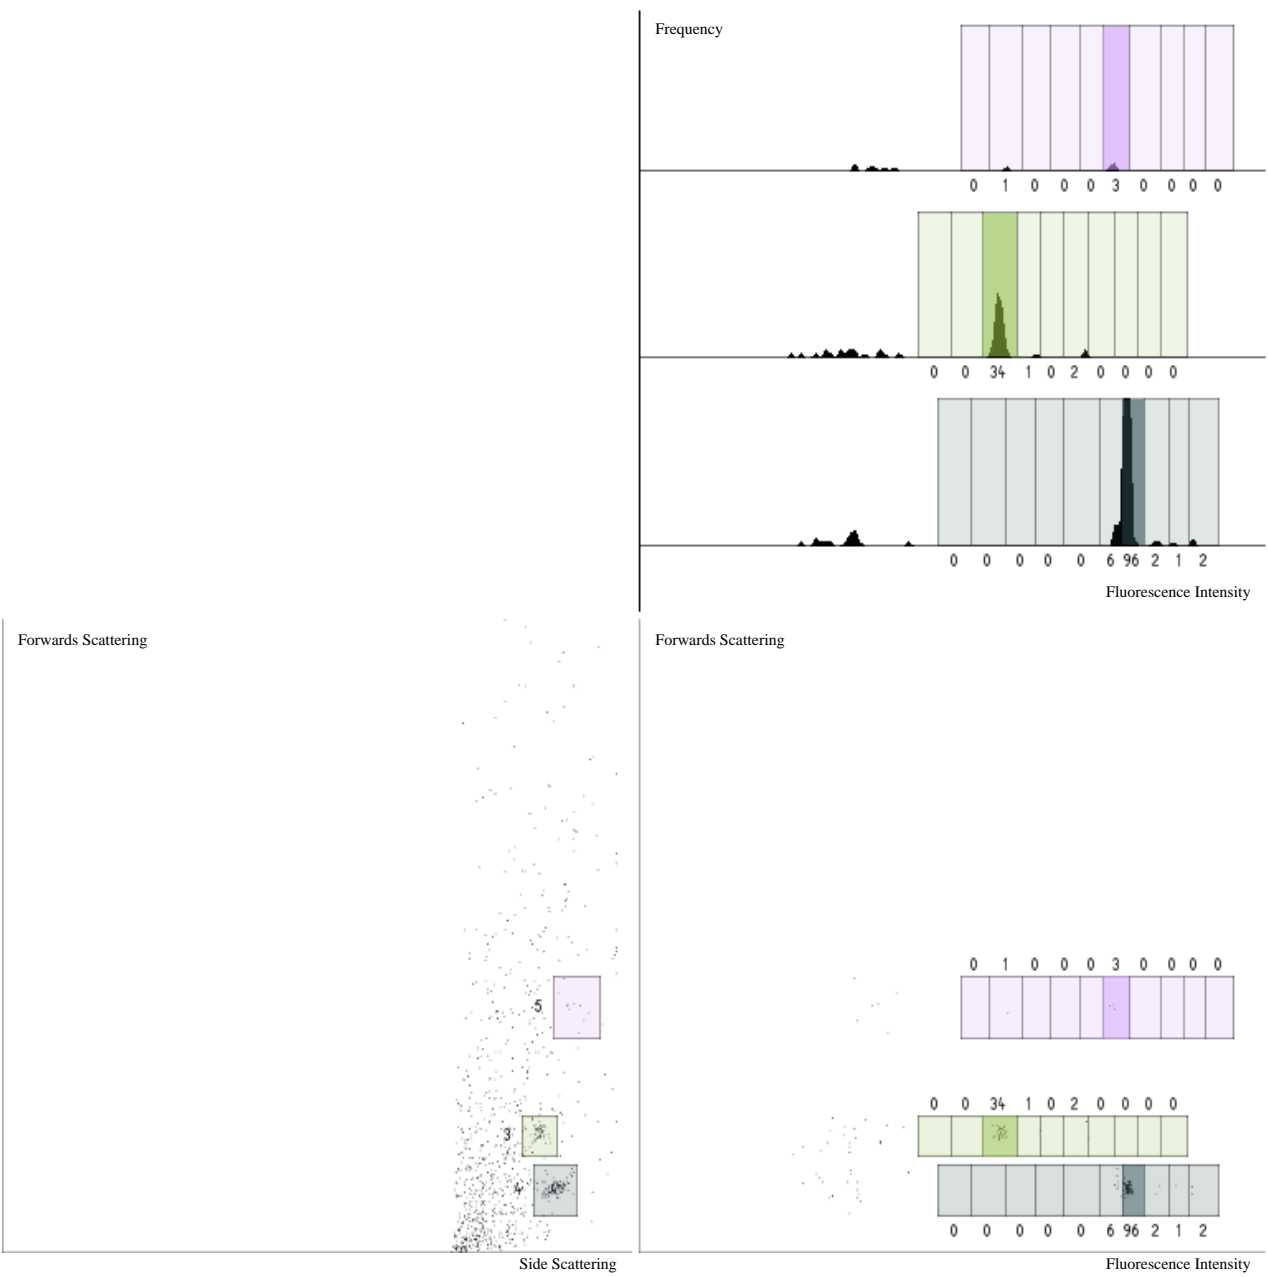

ANNEX 3: TAG DECONVOLUTION - BEAD 315

Passes flow sorting criteria: Yes  
Passes tag deconvolution criteria: Yes  
Included in protocol analysis: Yes  
Protocol: 2, 5, 9, 4  
Filename: Bin4\_plateA2\_F9.fcs  
Split 1: Petrol shading  
Split 2: Green shading  
Split 3: Violet shading

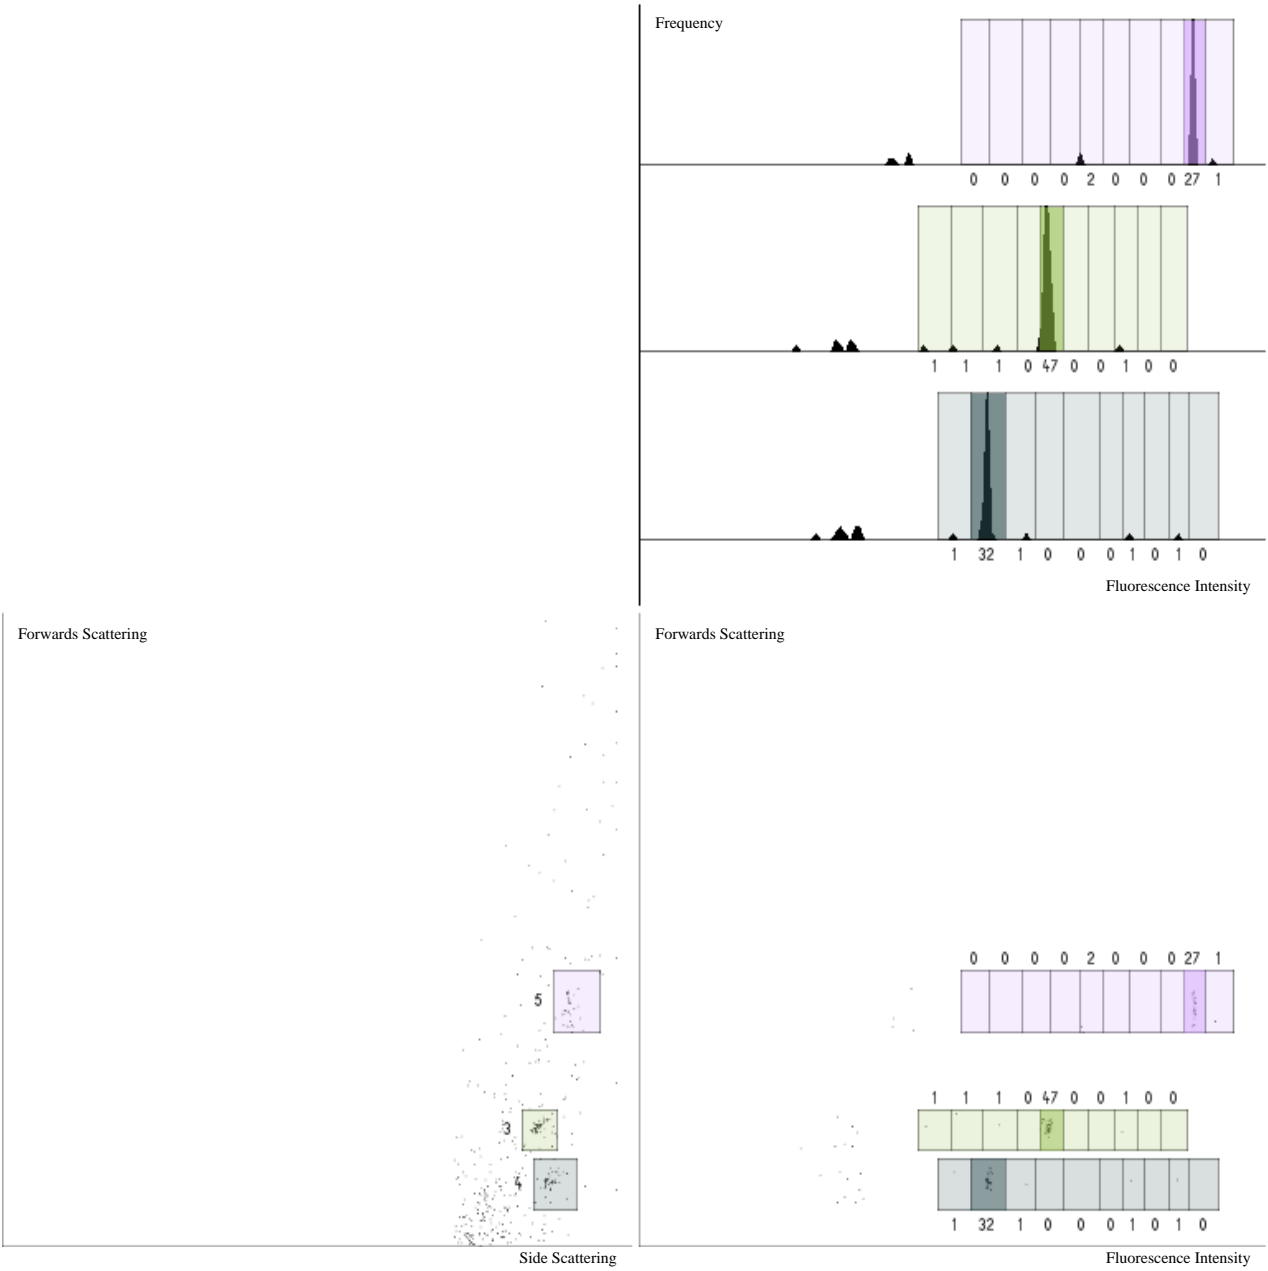

ANNEX 3: TAG DECONVOLUTION - BEAD 316

Passes flow sorting criteria: Yes  
Passes tag deconvolution criteria: Yes  
Included in protocol analysis: Yes  
Protocol: 5, 3, 9, 4  
Filename: Bin4\_plateA2\_F10.fcs  
Split 1: Petrol shading  
Split 2: Green shading  
Split 3: Violet shading

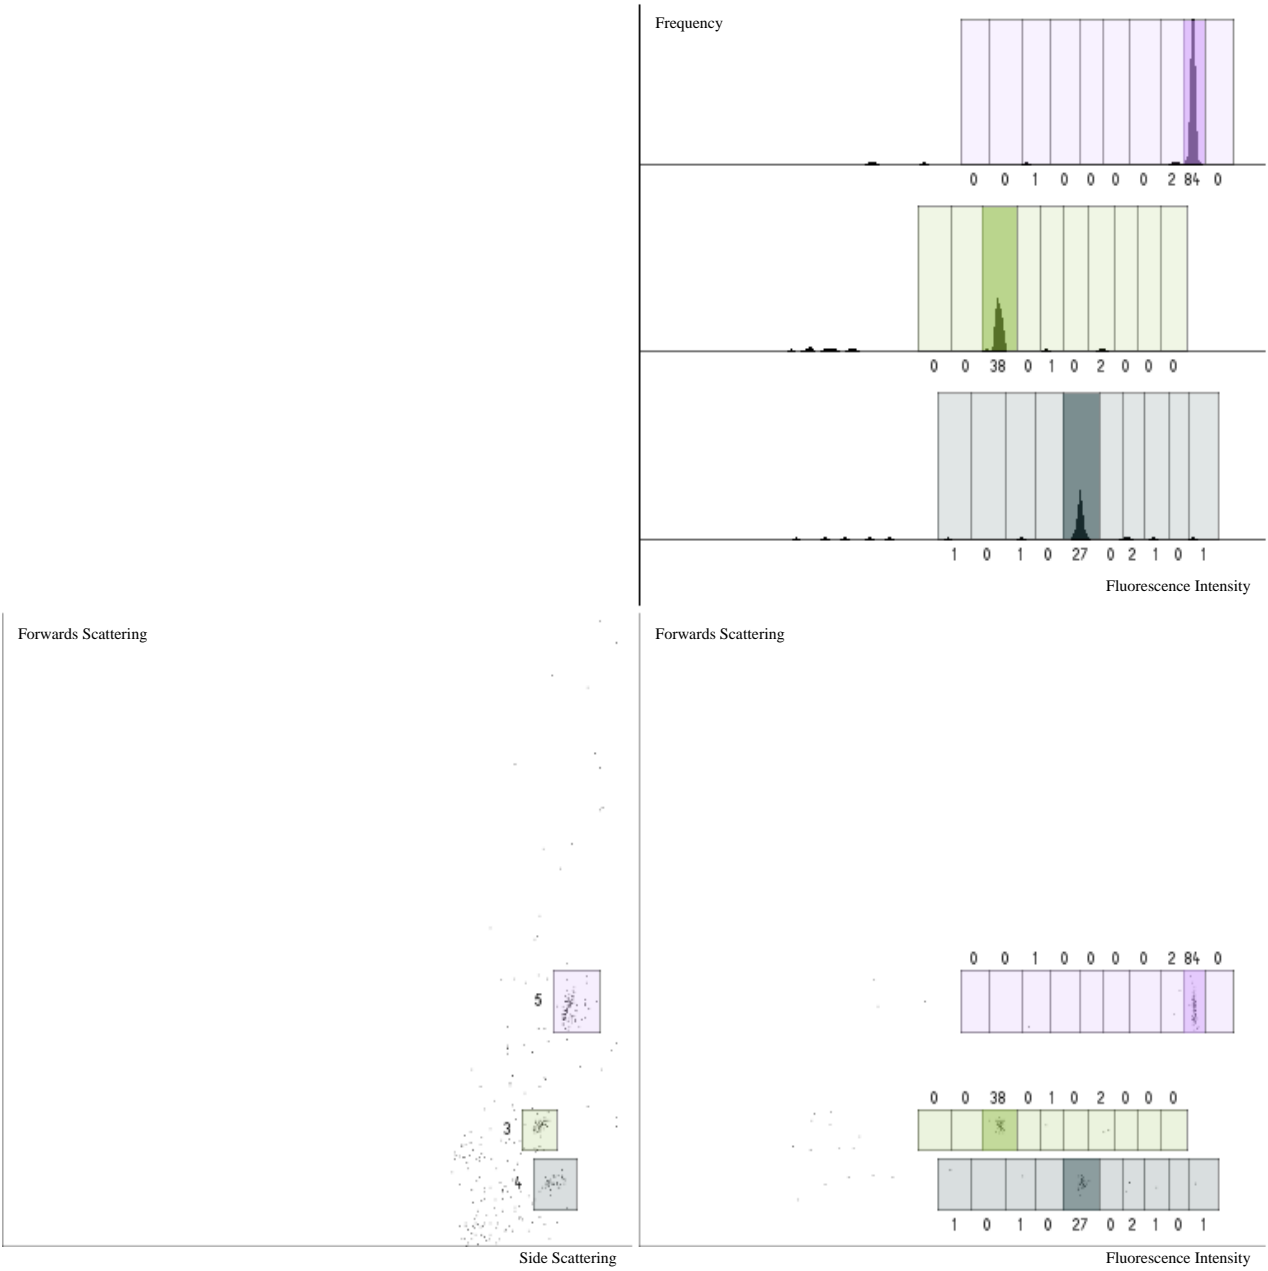

ANNEX 3: TAG DECONVOLUTION - BEAD 317

Passes flow sorting criteria: Yes  
Passes tag deconvolution criteria: Yes  
Included in protocol analysis: Yes  
Protocol: 6, 8, 4, 4  
Filename: Bin4\_plateA2\_F11.fcs  
Split 1: Petrol shading  
Split 2: Green shading  
Split 3: Violet shading

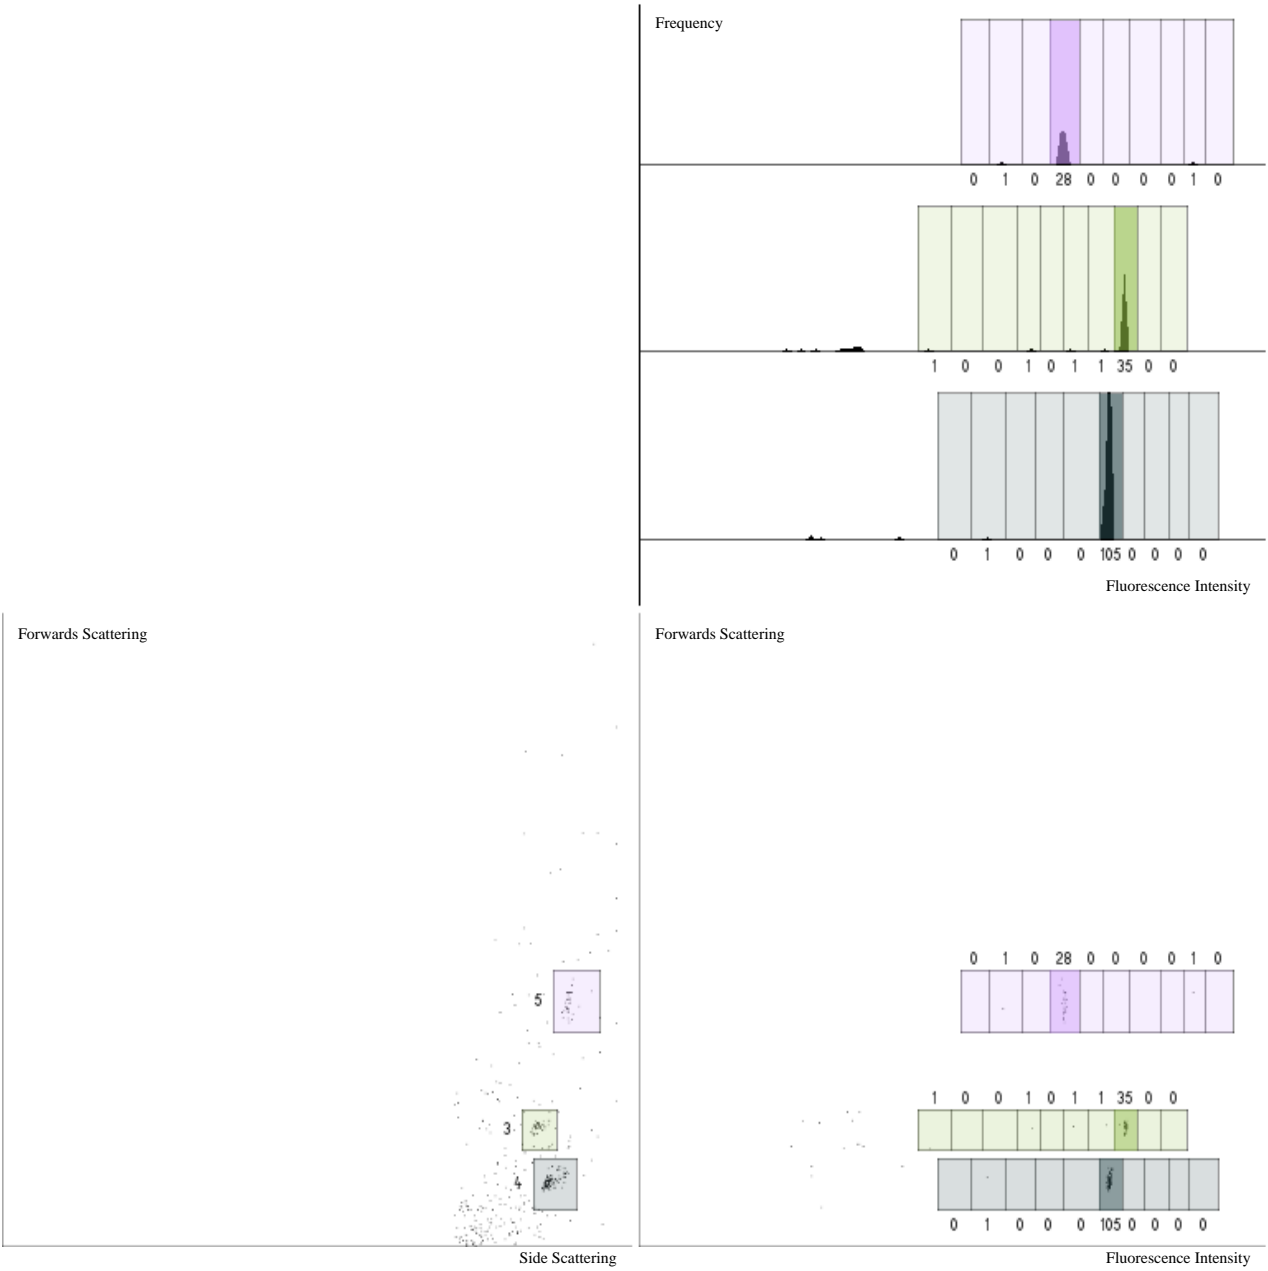

ANNEX 3: TAG DECONVOLUTION - BEAD 318

Passes flow sorting criteria: Yes  
Passes tag deconvolution criteria: Yes  
Included in protocol analysis: Yes  
Protocol: 5, 9, 3, 4  
Filename: Bin4\_plateA2\_F12.fcs  
Split 1: Petrol shading  
Split 2: Green shading  
Split 3: Violet shading

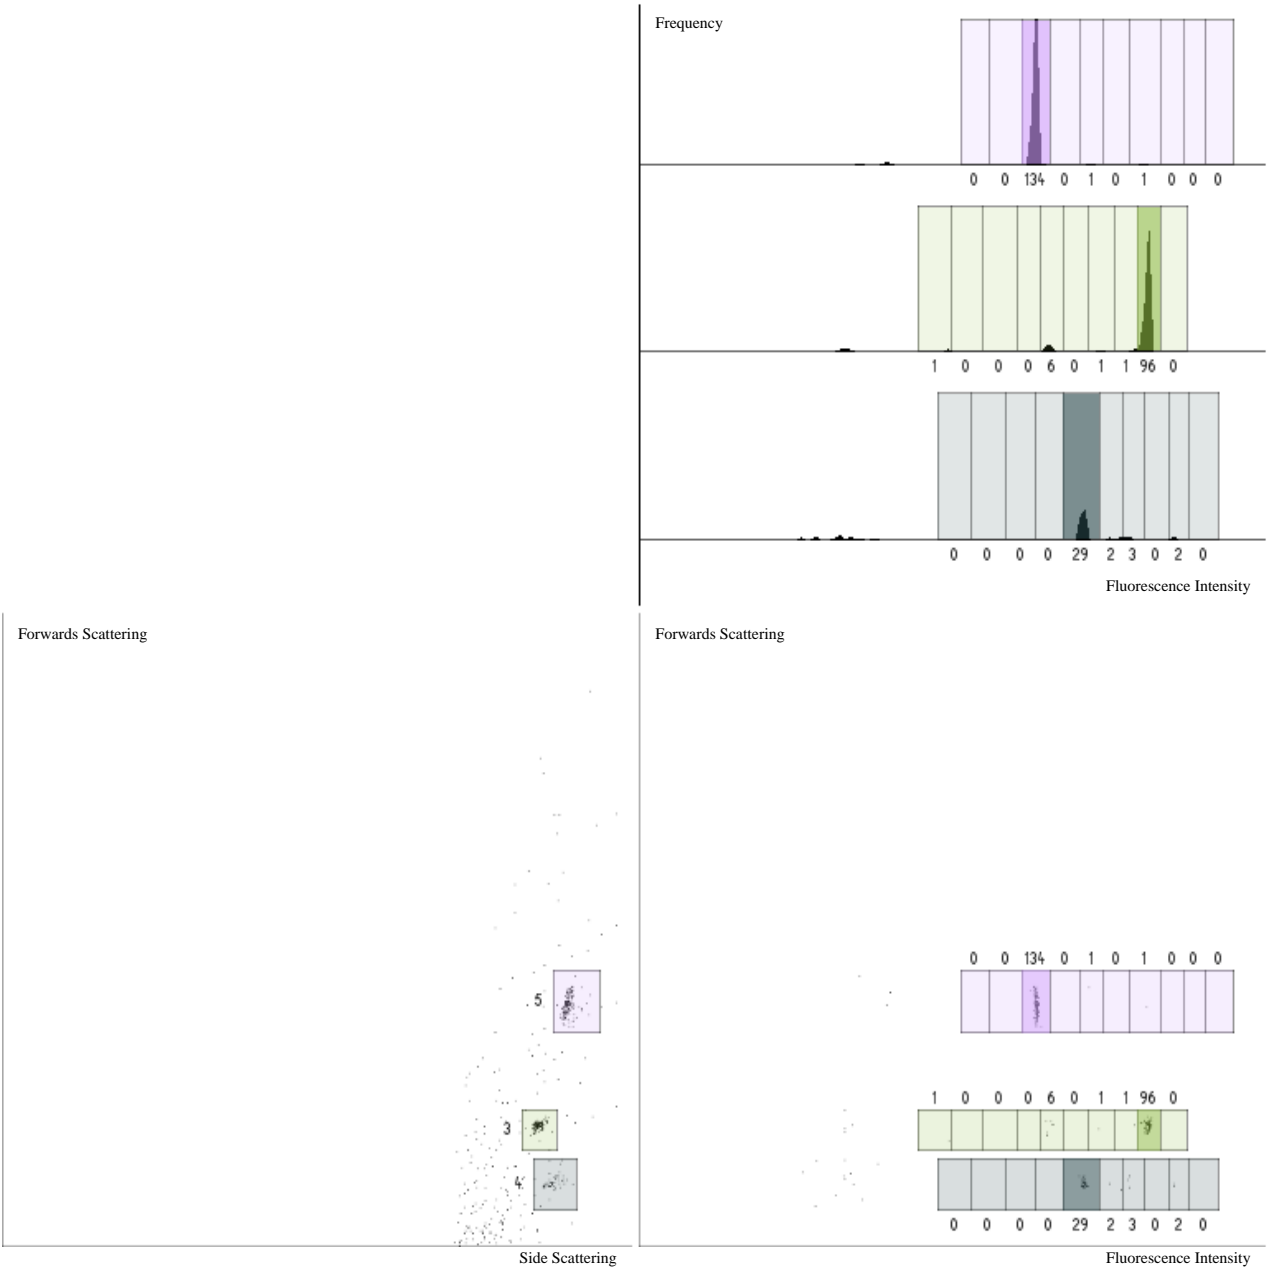



ANNEX 3: TAG DECONVOLUTION - BEAD 319

Passes flow sorting criteria: Yes  
Passes tag deconvolution criteria: Yes  
Included in protocol analysis: Yes  
Protocol: 7, 2, 3, 4  
Filename: Bin4\_plateA2\_G4.fcs  
Split 1: Petrol shading  
Split 2: Green shading  
Split 3: Violet shading

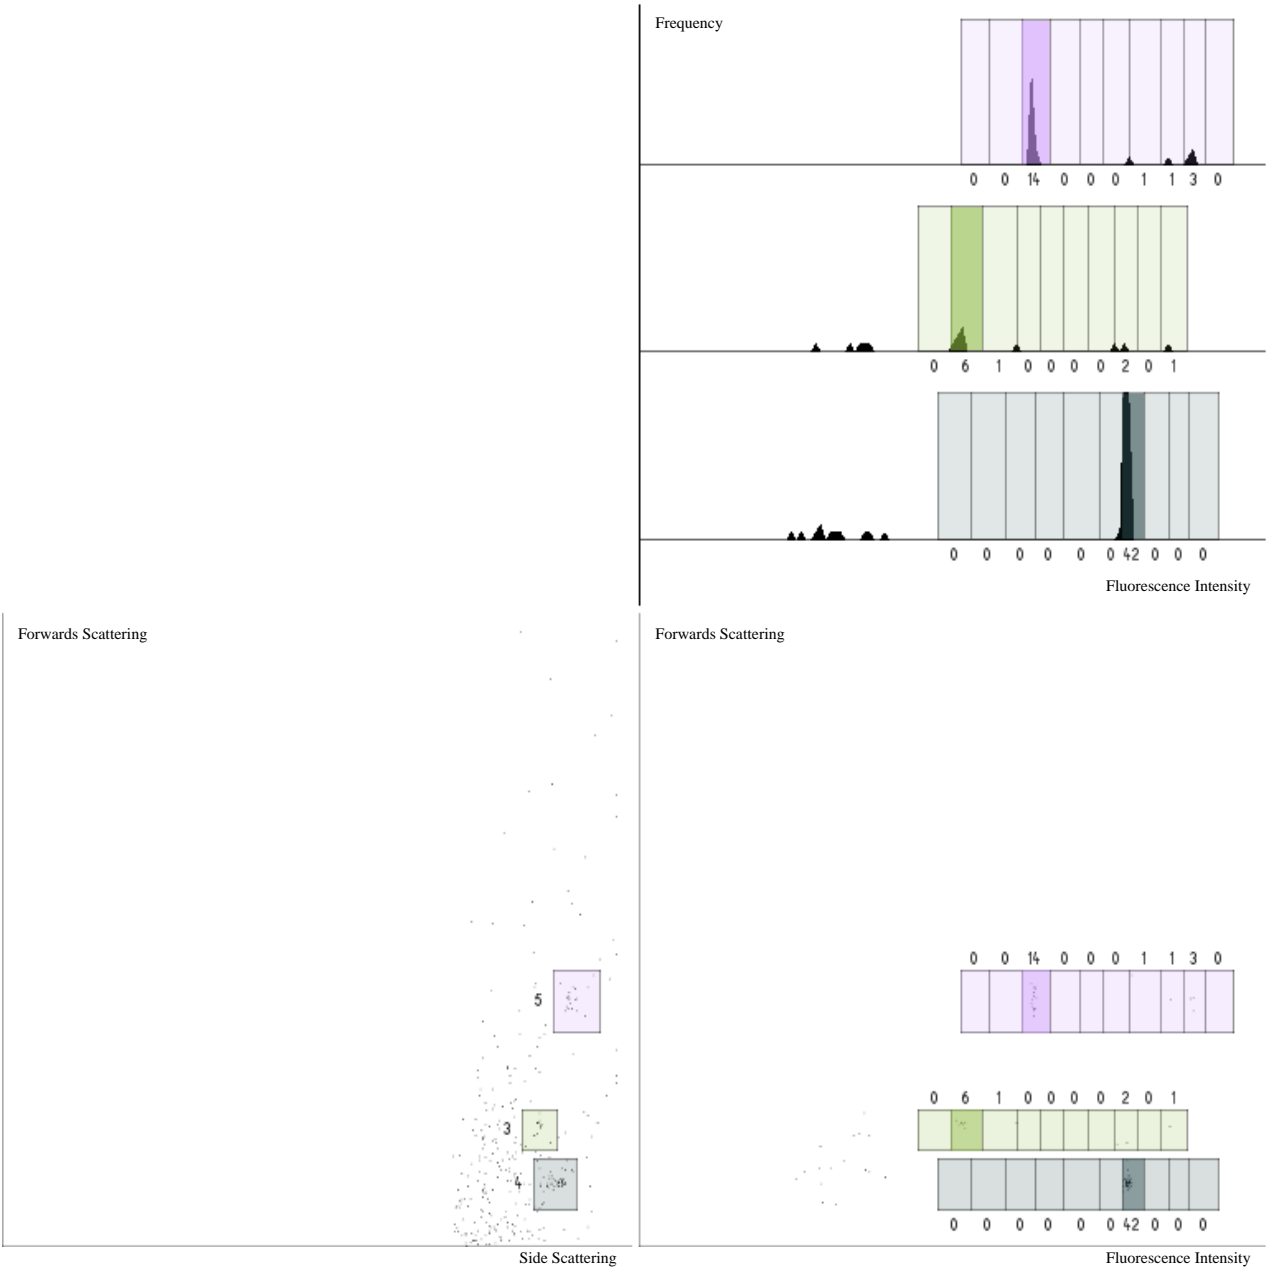

ANNEX 3: TAG DECONVOLUTION - BEAD 320

Passes flow sorting criteria: Yes  
Passes tag deconvolution criteria: No  
Included in protocol analysis: No  
Protocol: N/A  
Filename: Bin4\_plateA2\_G6.fcs  
Split 1: Petrol shading  
Split 2: Green shading  
Split 3: Violet shading

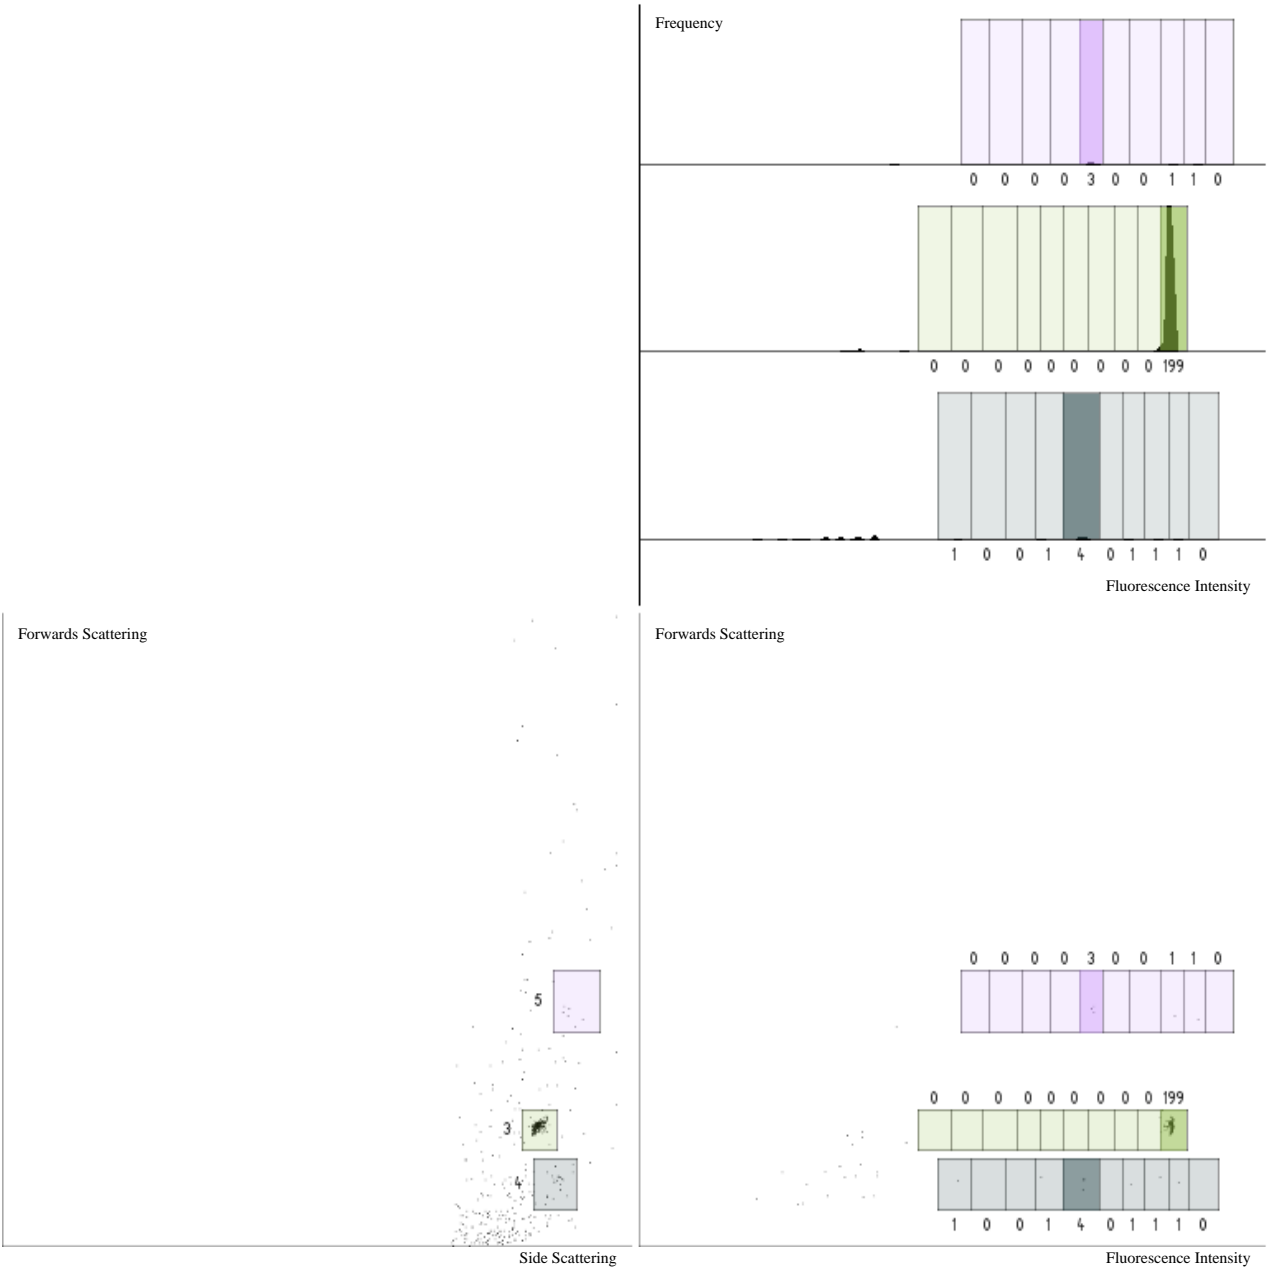

ANNEX 3: TAG DECONVOLUTION - BEAD 321

Passes flow sorting criteria: Yes  
Passes tag deconvolution criteria: Yes  
Included in protocol analysis: Yes  
Protocol: 4, 8, 3, 4  
Filename: Bin4\_plateA2\_G7.fcs  
Split 1: Petrol shading  
Split 2: Green shading  
Split 3: Violet shading

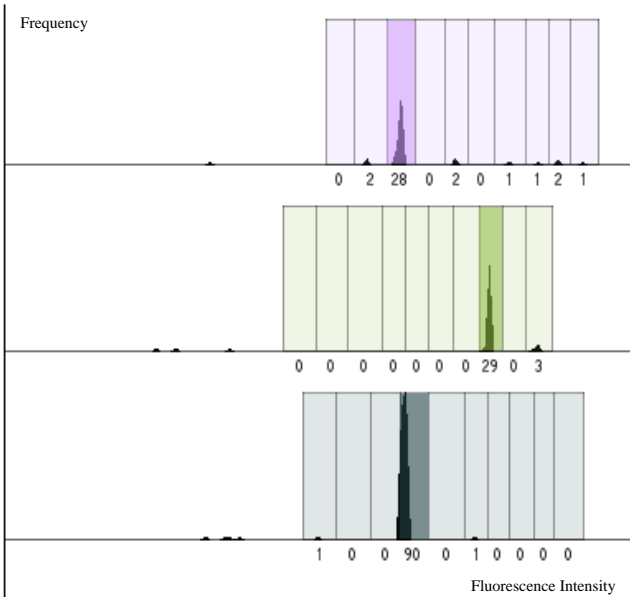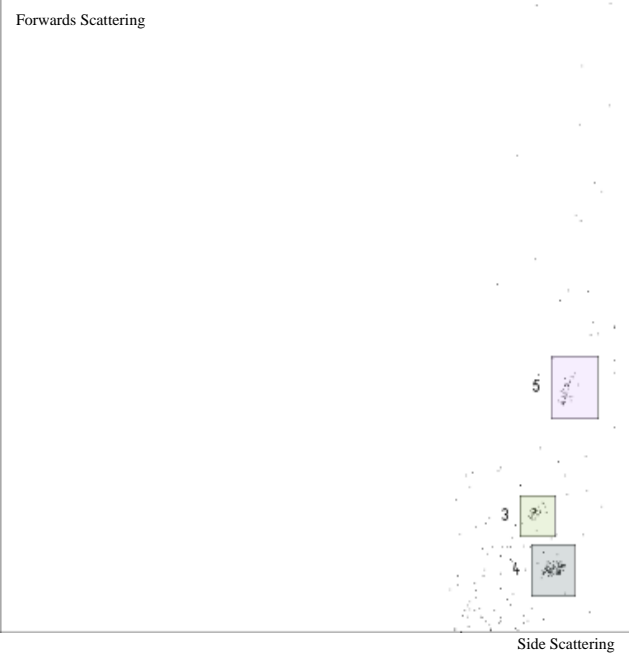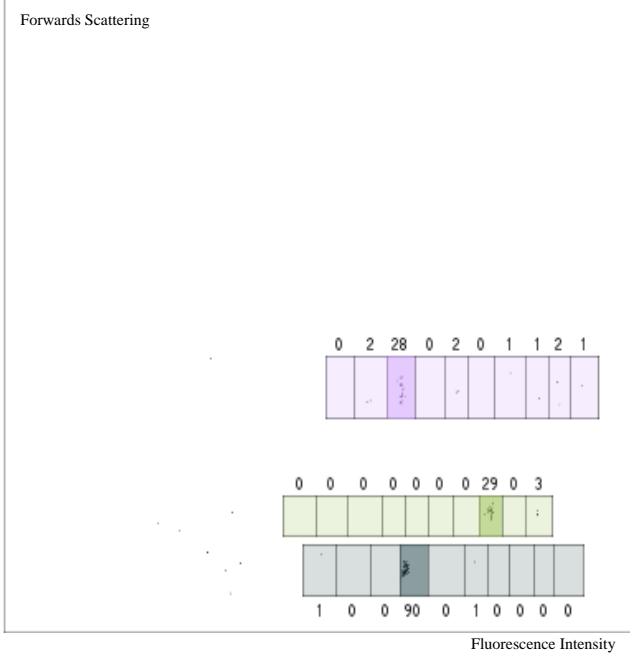

ANNEX 3: TAG DECONVOLUTION - BEAD 322

Passes flow sorting criteria: Yes  
Passes tag deconvolution criteria: No  
Included in protocol analysis: No  
Protocol: N/A  
Filename: Bin4\_plateA2\_G8.fcs  
Split 1: Petrol shading  
Split 2: Green shading  
Split 3: Violet shading

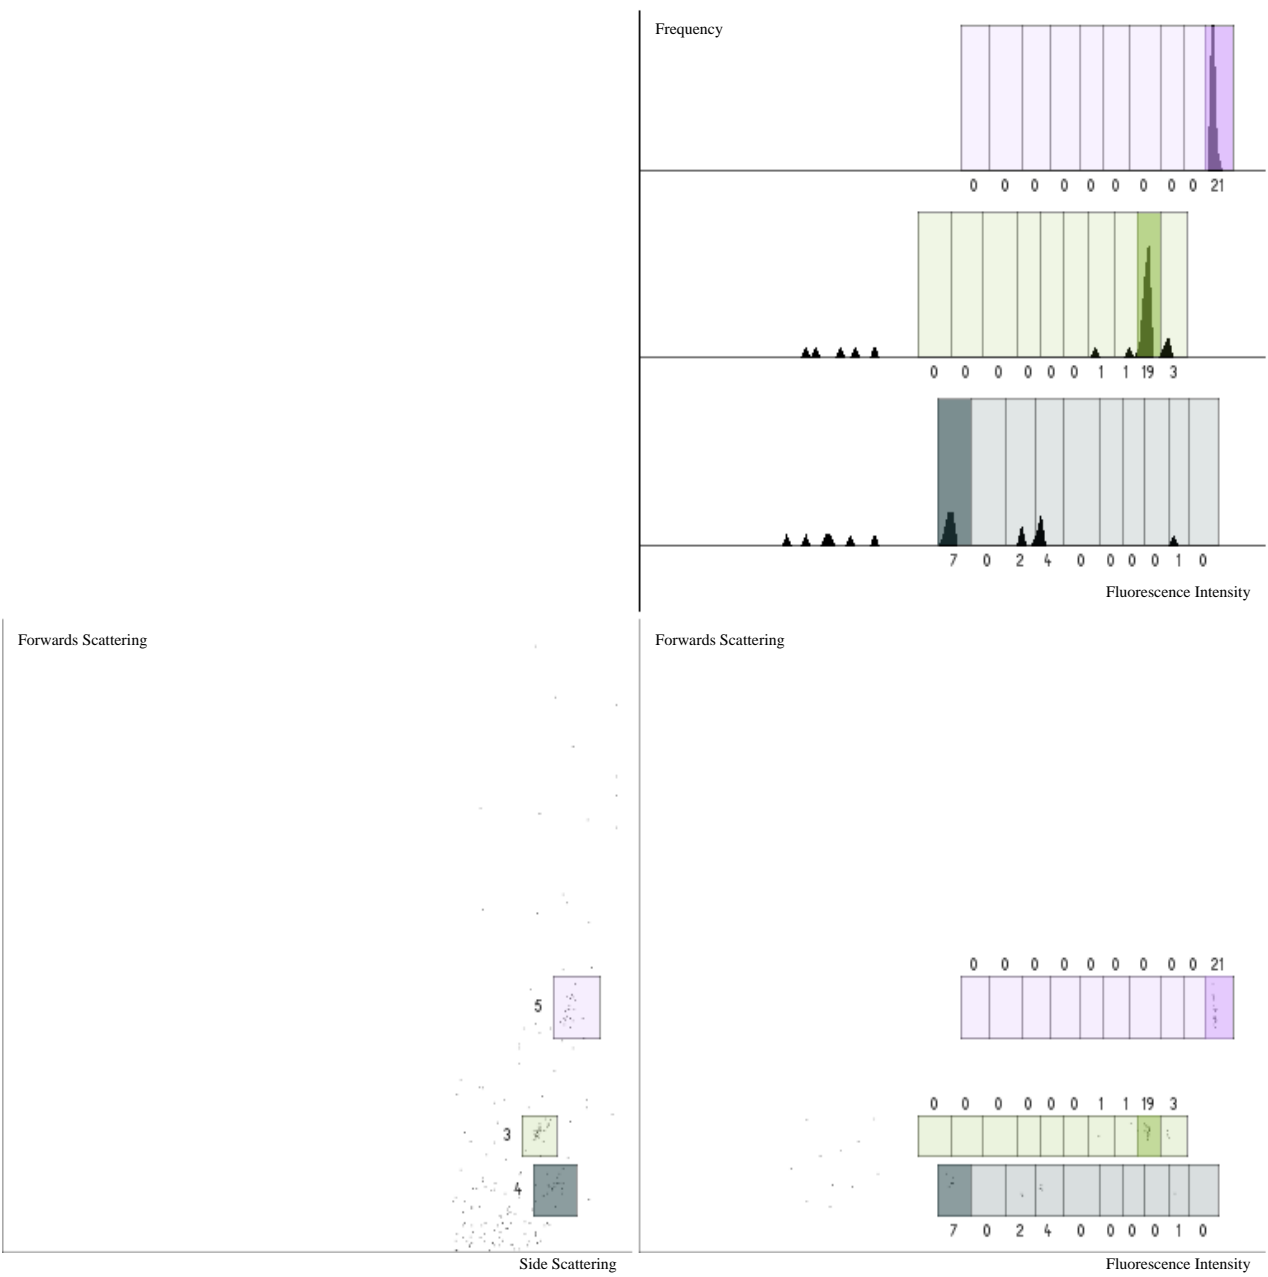

ANNEX 3: TAG DECONVOLUTION - BEAD 323

Passes flow sorting criteria: Yes  
Passes tag deconvolution criteria: Yes  
Included in protocol analysis: Yes  
Protocol: 1, 1, 6, 4  
Filename: Bin4\_plateA2\_G9.fcs  
Split 1: Petrol shading  
Split 2: Green shading  
Split 3: Violet shading

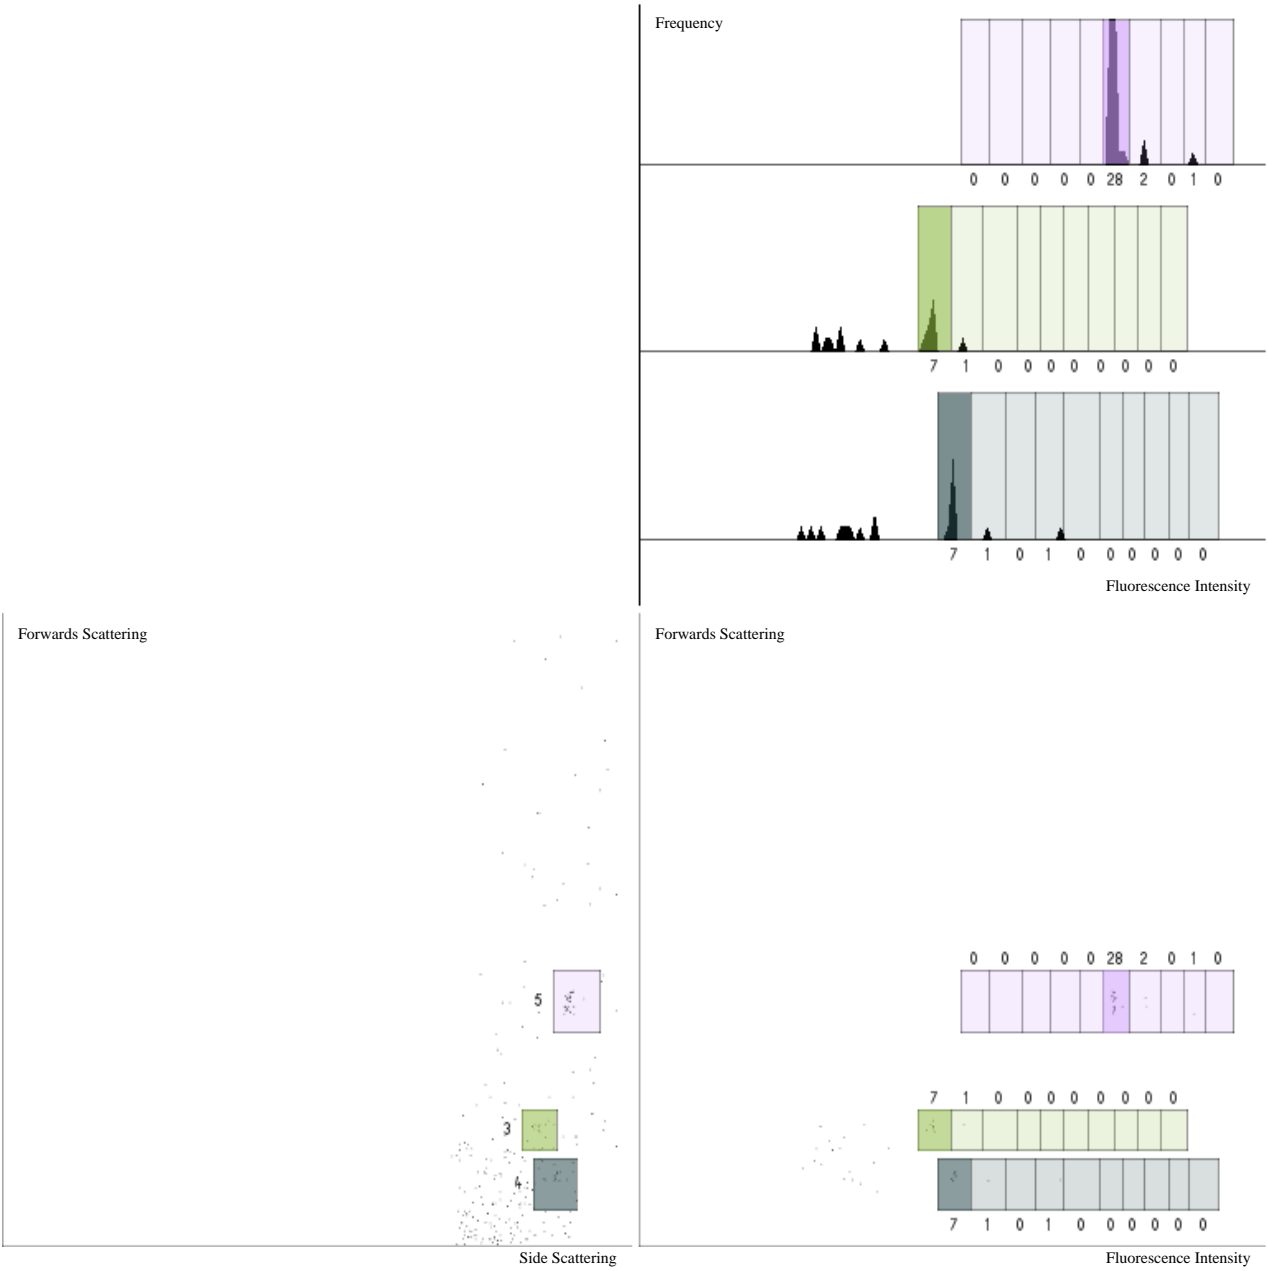

ANNEX 3: TAG DECONVOLUTION - BEAD 324

Passes flow sorting criteria: Yes  
Passes tag deconvolution criteria: No  
Included in protocol analysis: No  
Protocol: N/A  
Filename: Bin4\_plateA2\_G10.fcs  
Split 1: Petrol shading  
Split 2: Green shading  
Split 3: Violet shading

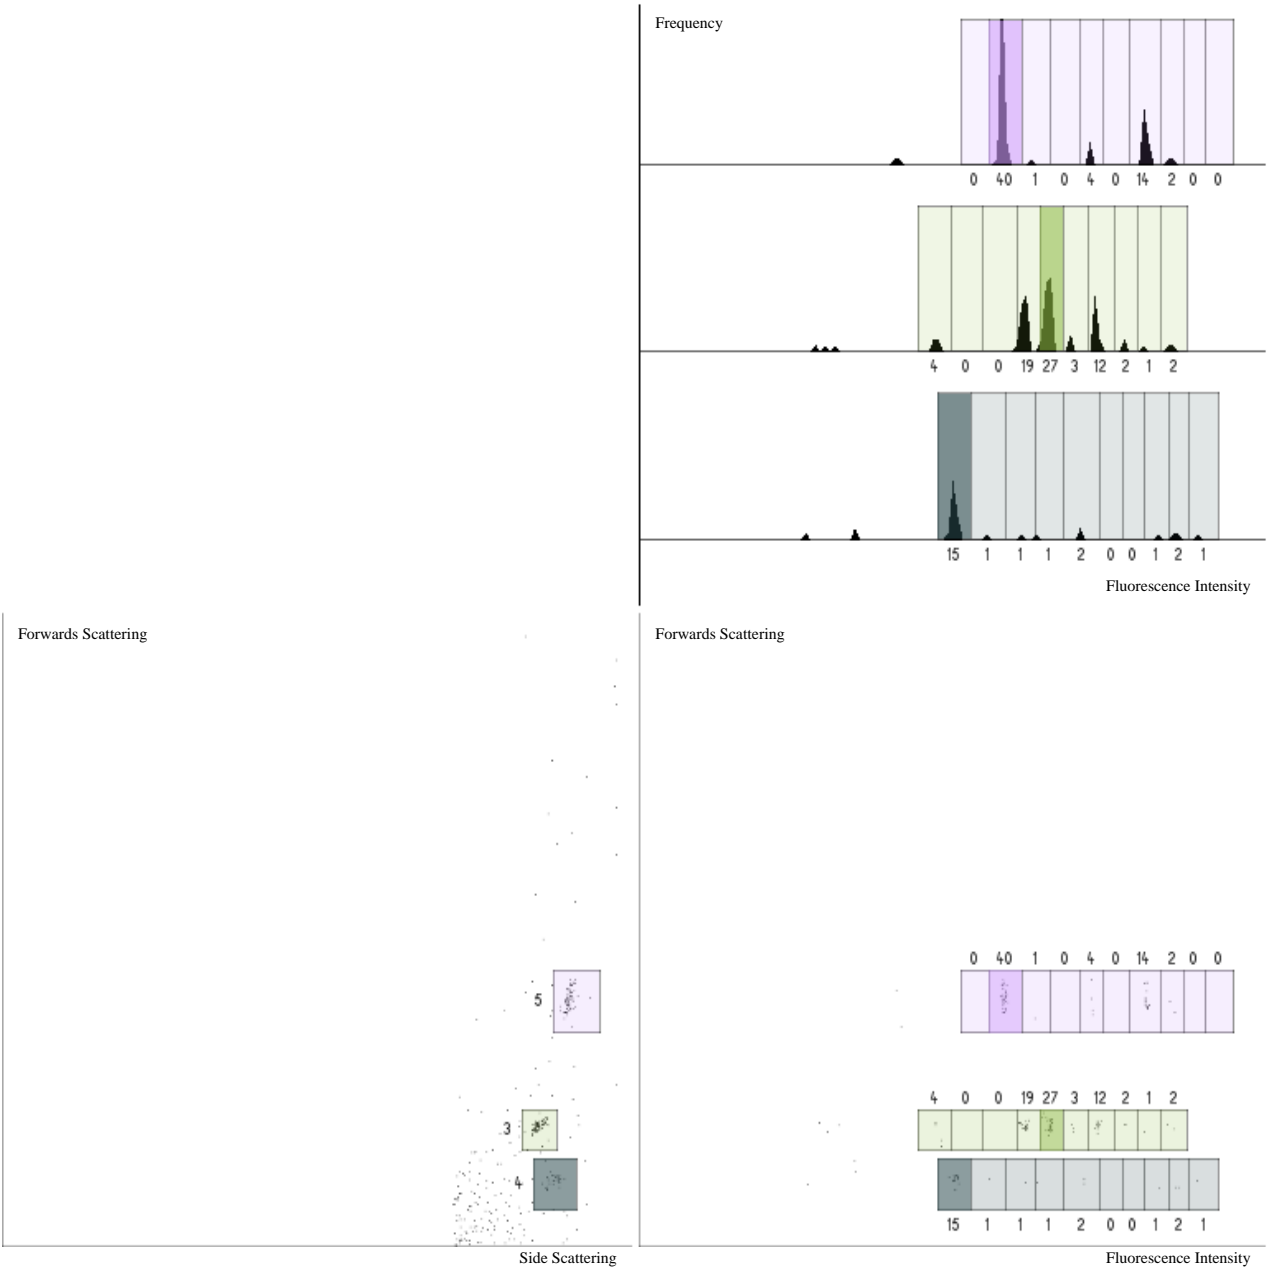

ANNEX 3: TAG DECONVOLUTION - BEAD 325

Passes flow sorting criteria: Yes  
Passes tag deconvolution criteria: No  
Included in protocol analysis: No  
Protocol: N/A  
Filename: Bin4\_plateA2\_G11.fcs  
Split 1: Petrol shading  
Split 2: Green shading  
Split 3: Violet shading

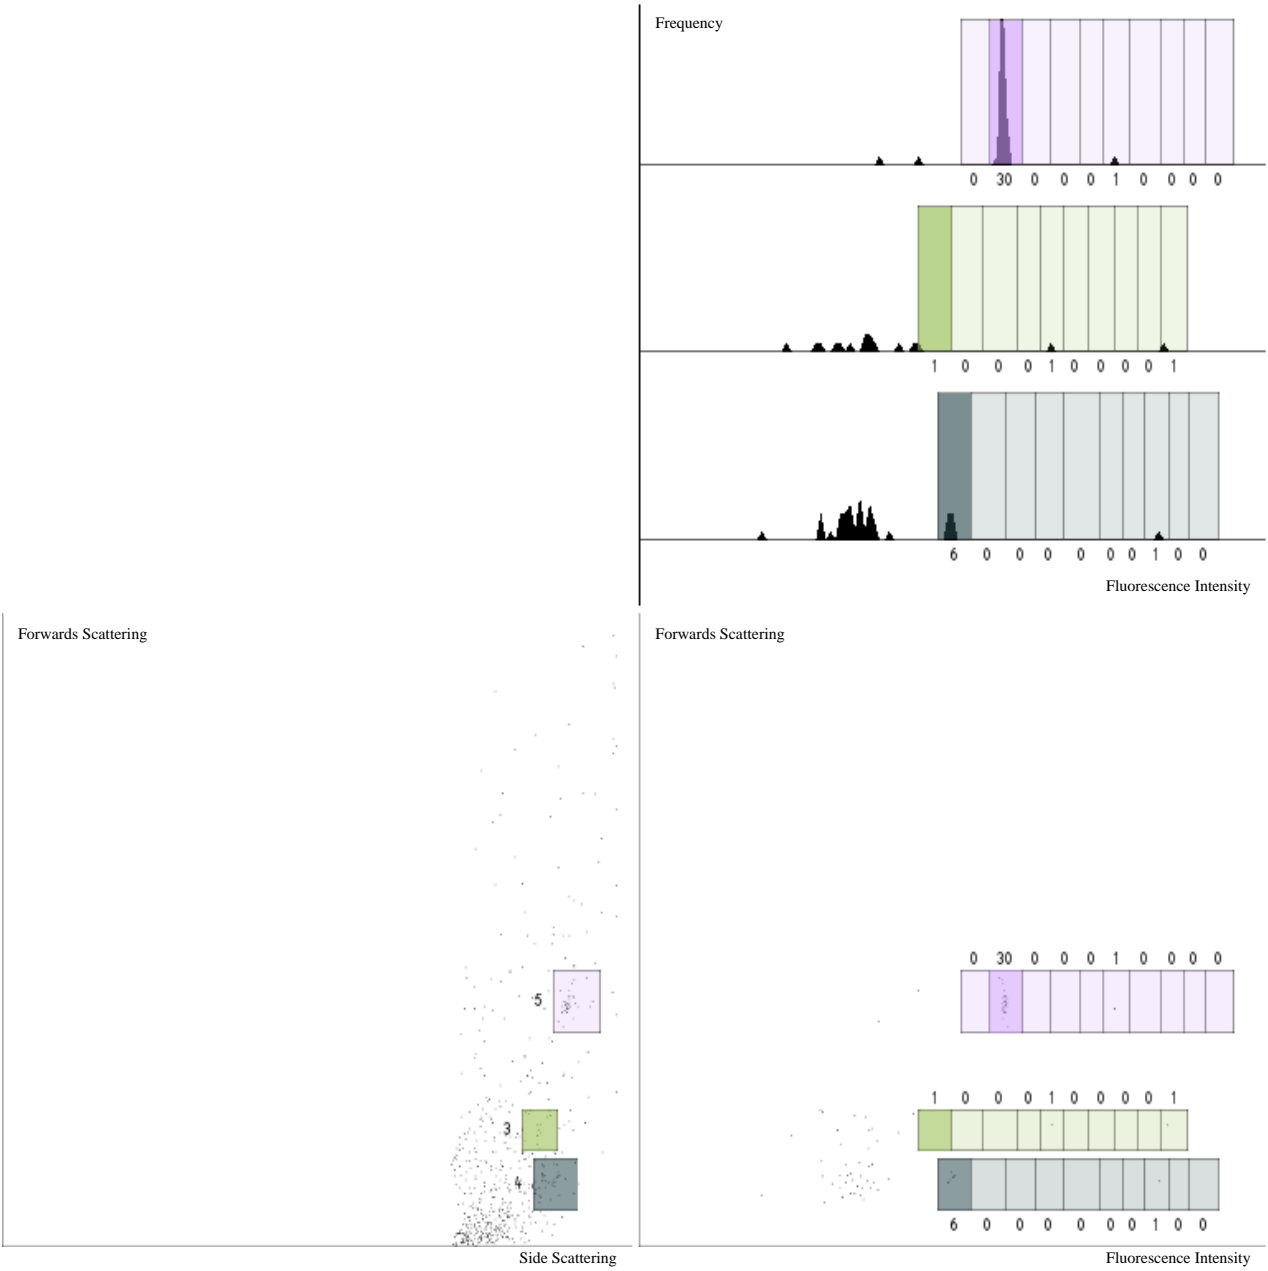

ANNEX 3: TAG DECONVOLUTION - BEAD 326

Passes flow sorting criteria: Yes  
Passes tag deconvolution criteria: Yes  
Included in protocol analysis: Yes  
Protocol: 3, 1, 5, 5  
Filename: Bin5\_plateA0\_C8.fcs  
Split 1: Petrol shading  
Split 2: Green shading  
Split 3: Violet shading

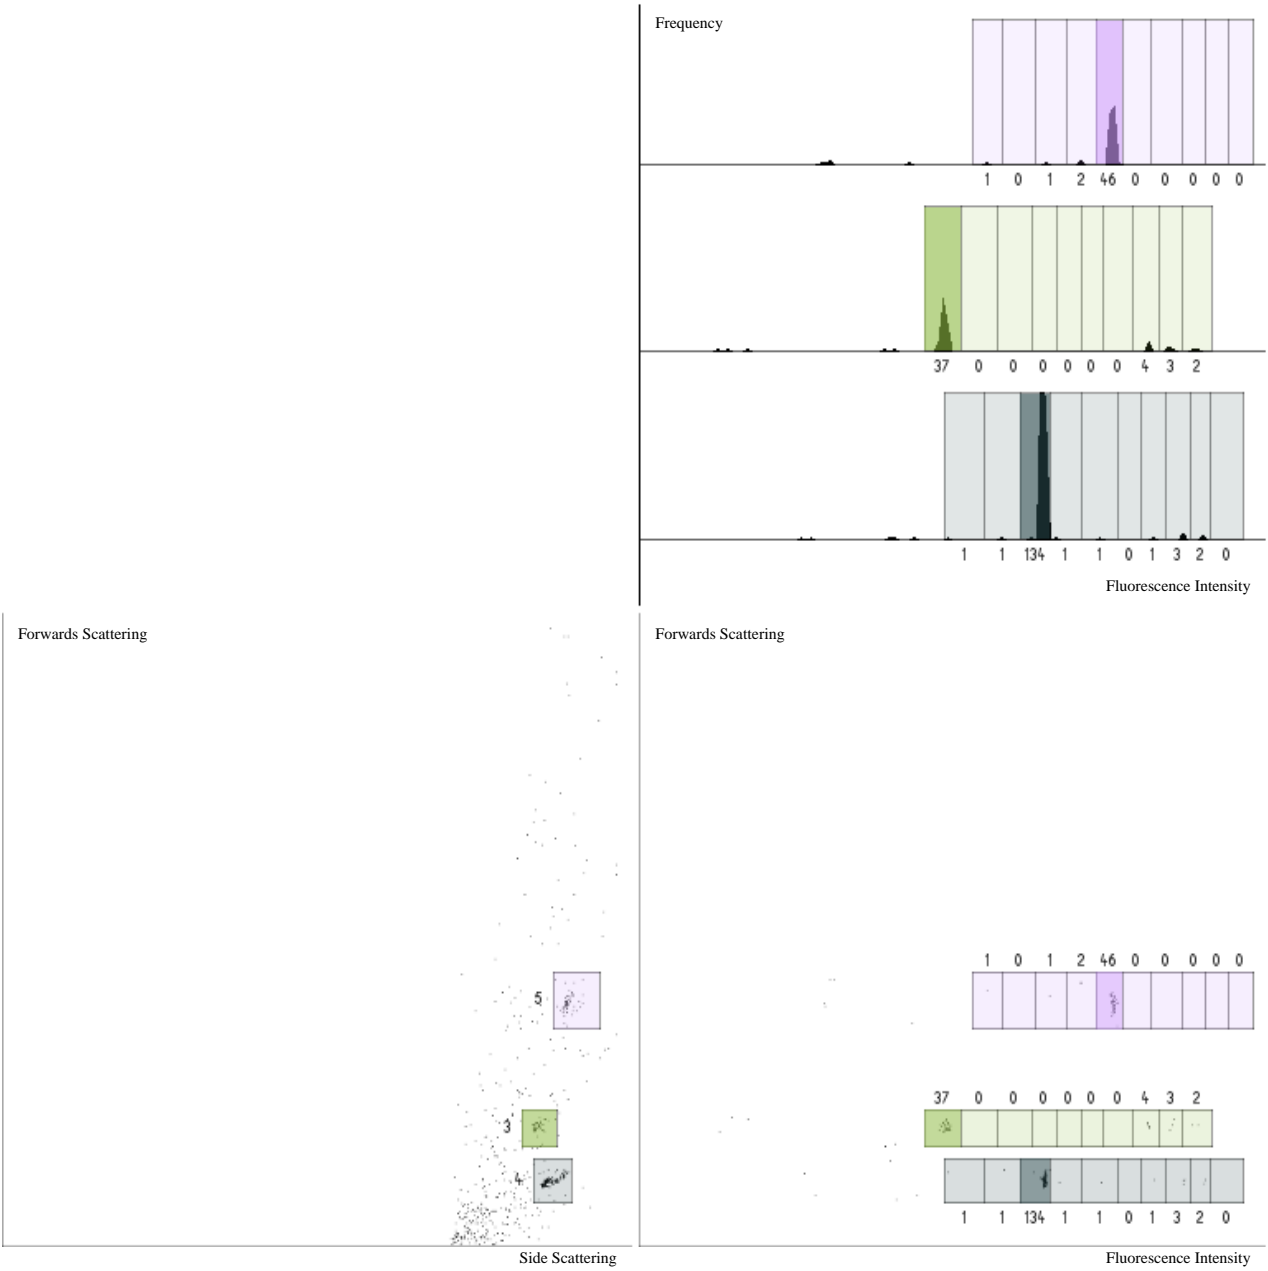



ANNEX 3: TAG DECONVOLUTION - BEAD 327

Passes flow sorting criteria: Yes  
Passes tag deconvolution criteria: Yes  
Included in protocol analysis: Yes  
Protocol: 6, 2, 5, 5  
Filename: Bin5\_plateA0\_B7.fcs  
Split 1: Petrol shading  
Split 2: Green shading  
Split 3: Violet shading

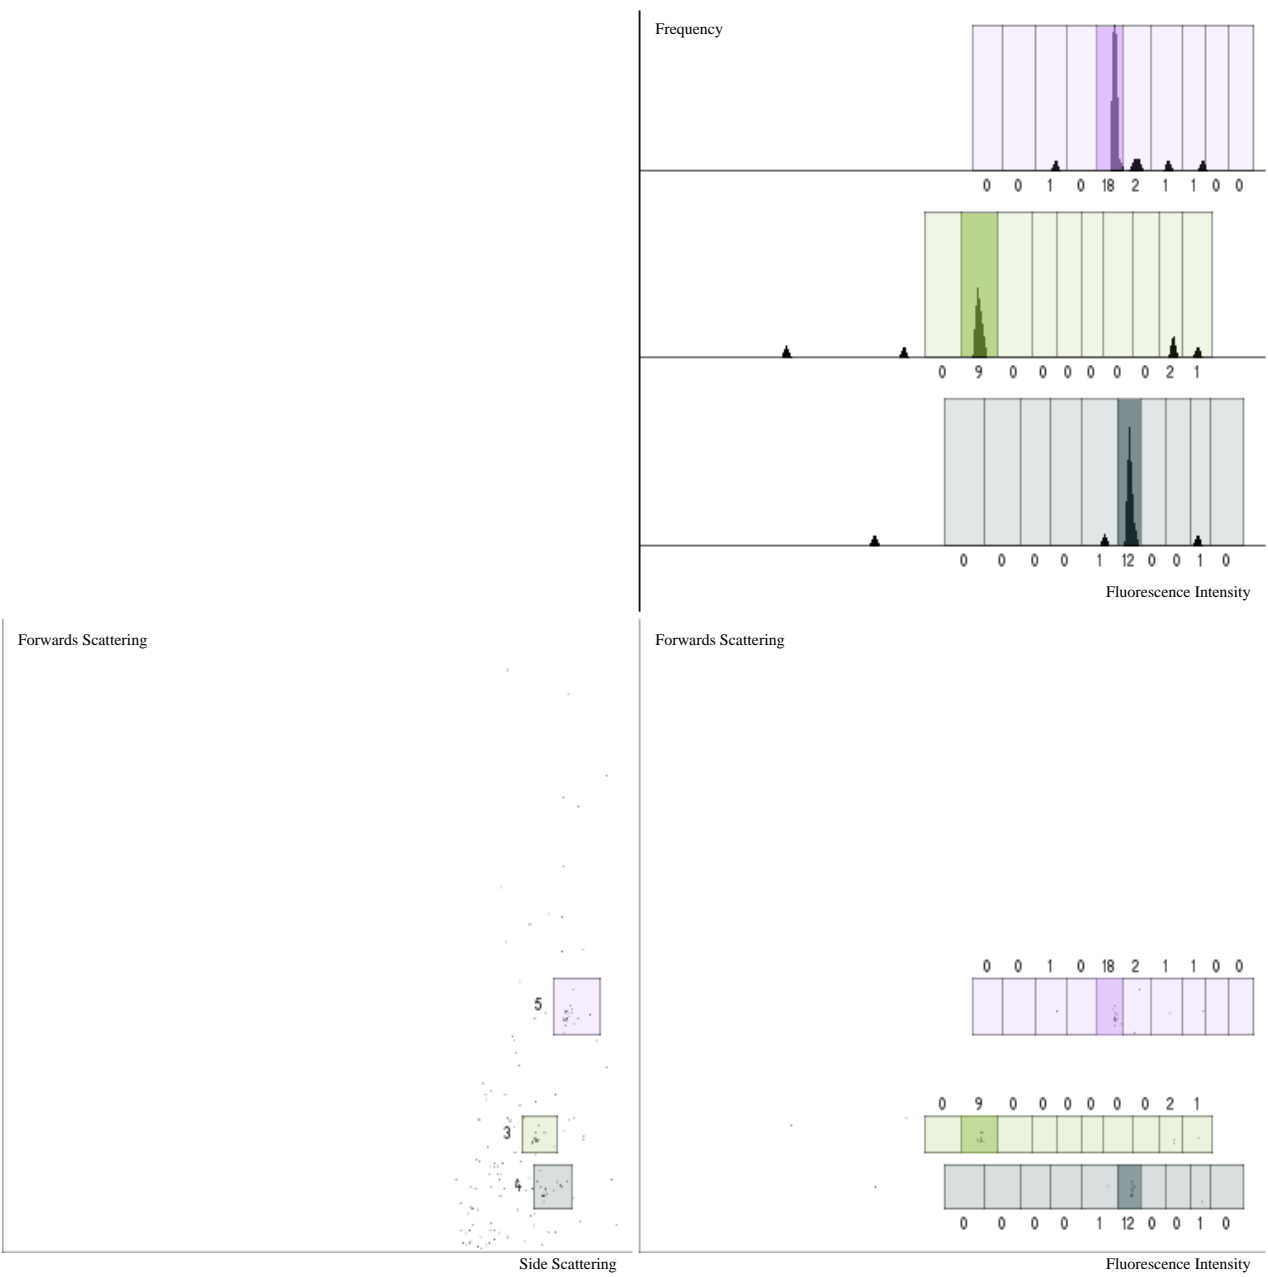

ANNEX 3: TAG DECONVOLUTION - BEAD 328

Passes flow sorting criteria: Yes  
Passes tag deconvolution criteria: Yes  
Included in protocol analysis: Yes  
Protocol: 5, 9, 6, 5  
Filename: Bin5\_plateA0\_B8.fcs  
Split 1: Petrol shading  
Split 2: Green shading  
Split 3: Violet shading

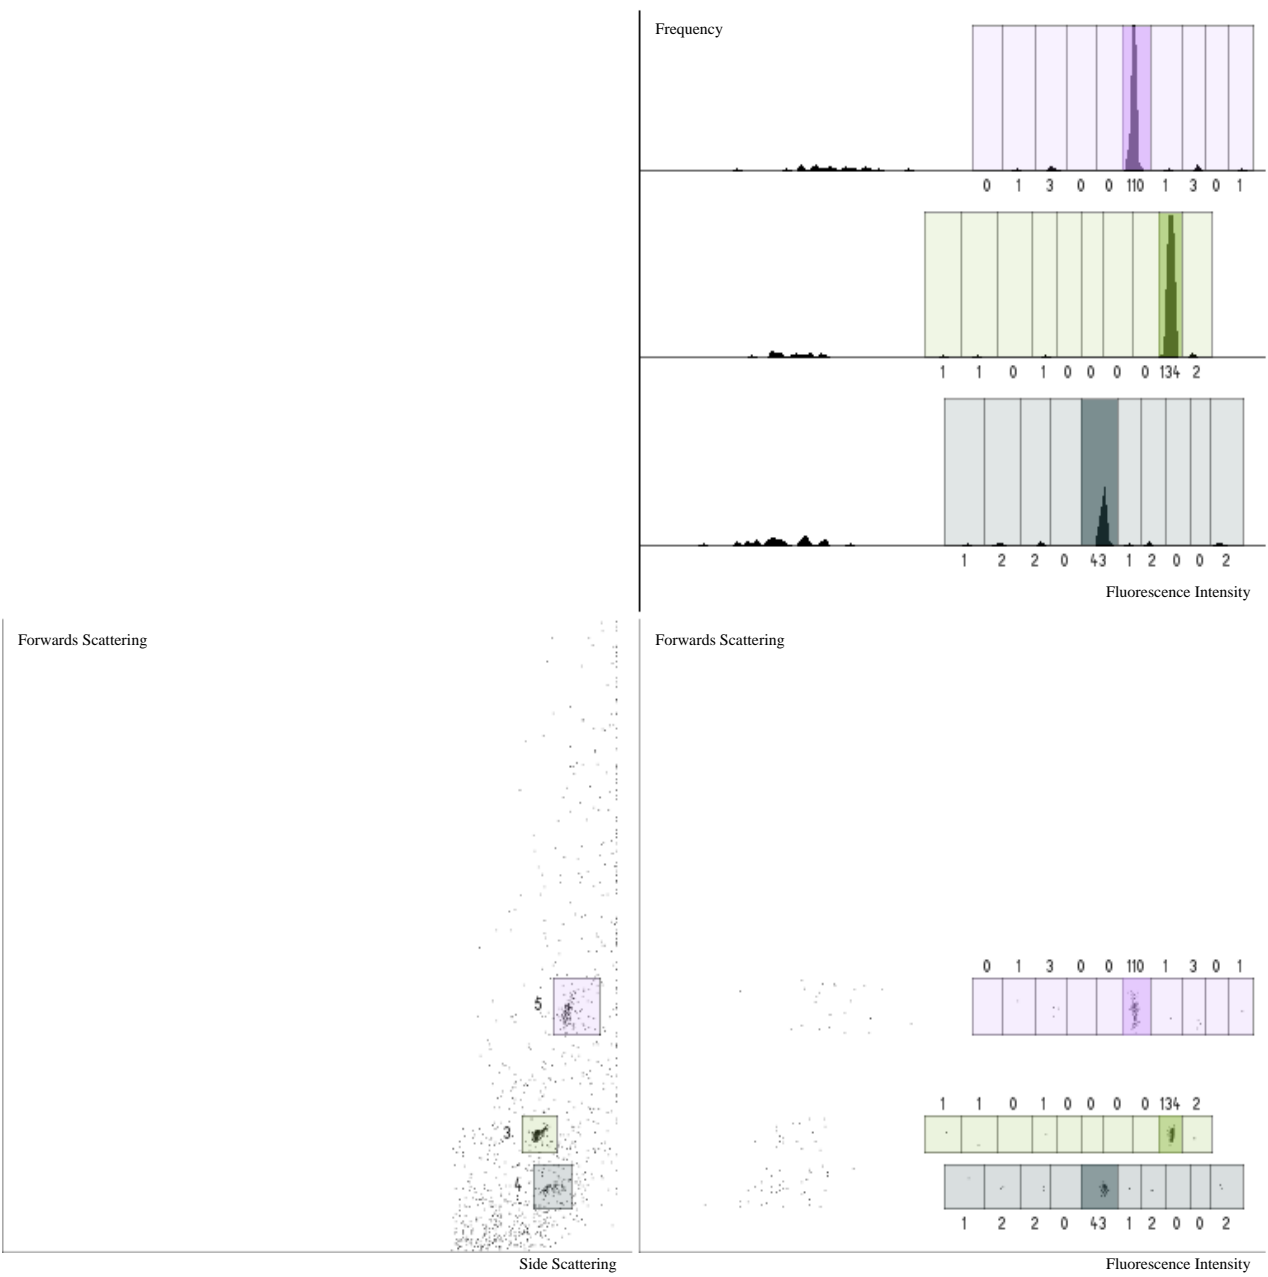

ANNEX 3: TAG DECONVOLUTION - BEAD 329

Passes flow sorting criteria: Yes  
Passes tag deconvolution criteria: Yes  
Included in protocol analysis: Yes  
Protocol: 6, 6, 10, 5  
Filename: Bin5\_plateA0\_B9.fcs  
Split 1: Petrol shading  
Split 2: Green shading  
Split 3: Violet shading

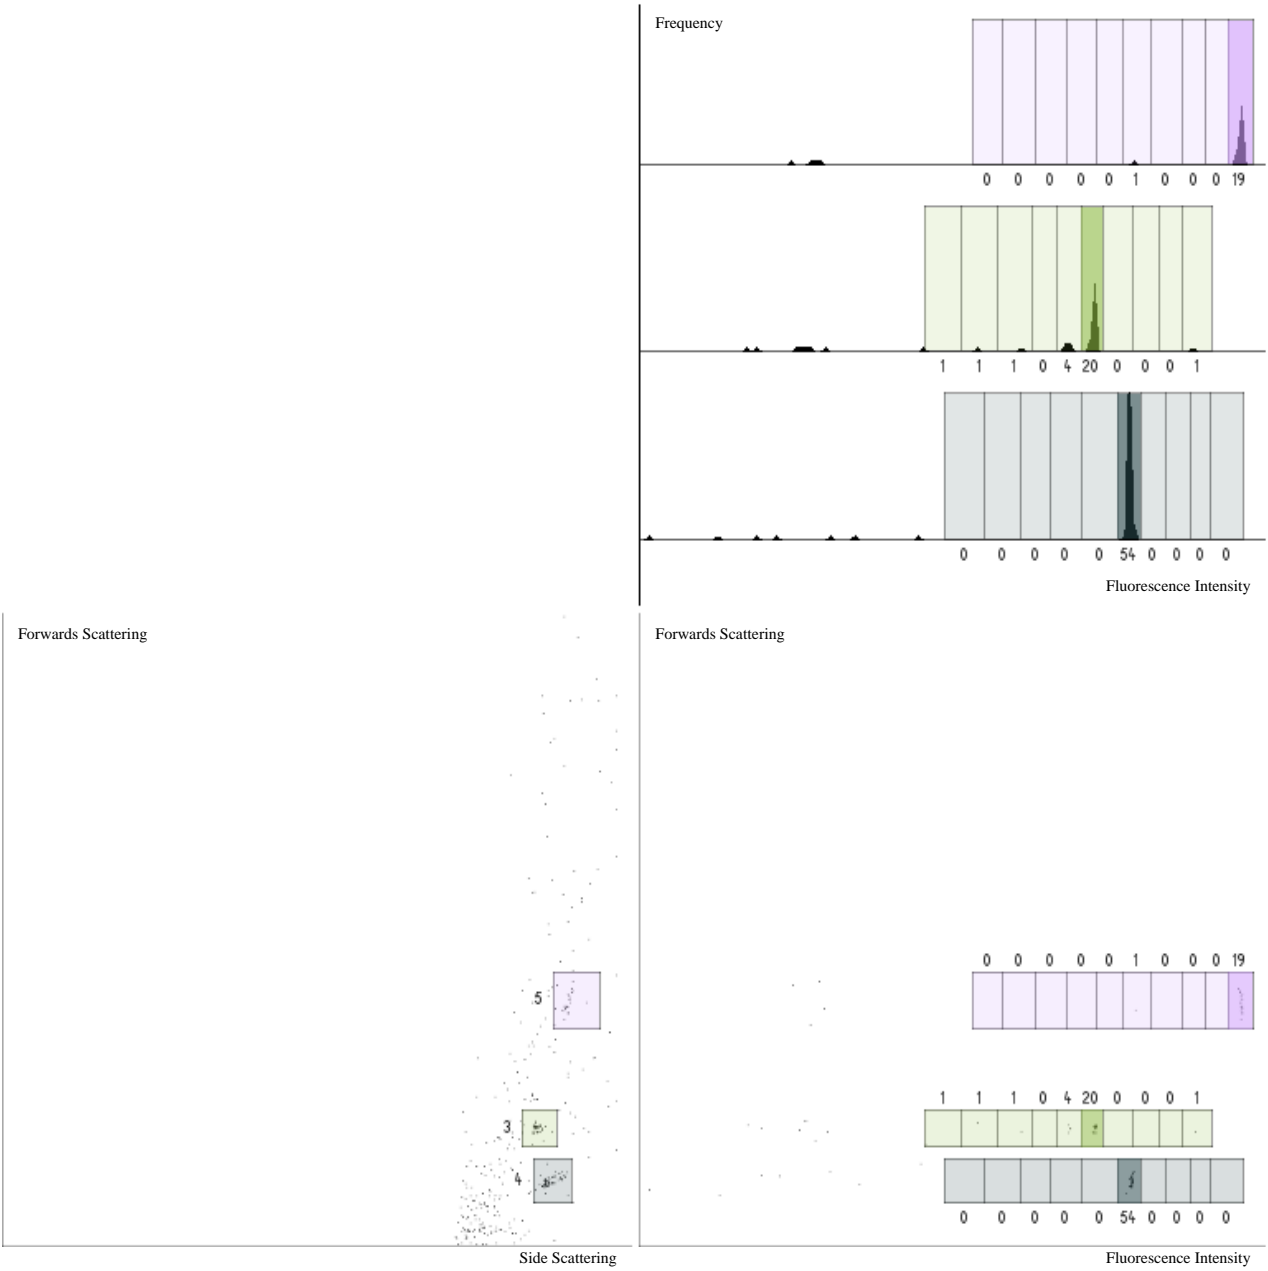

ANNEX 3: TAG DECONVOLUTION - BEAD 330

Passes flow sorting criteria: Yes  
Passes tag deconvolution criteria: Yes  
Included in protocol analysis: Yes  
Protocol: 4, 6, 5, 5  
Filename: Bin5\_plateA0\_B10.fcs  
Split 1: Petrol shading  
Split 2: Green shading  
Split 3: Violet shading

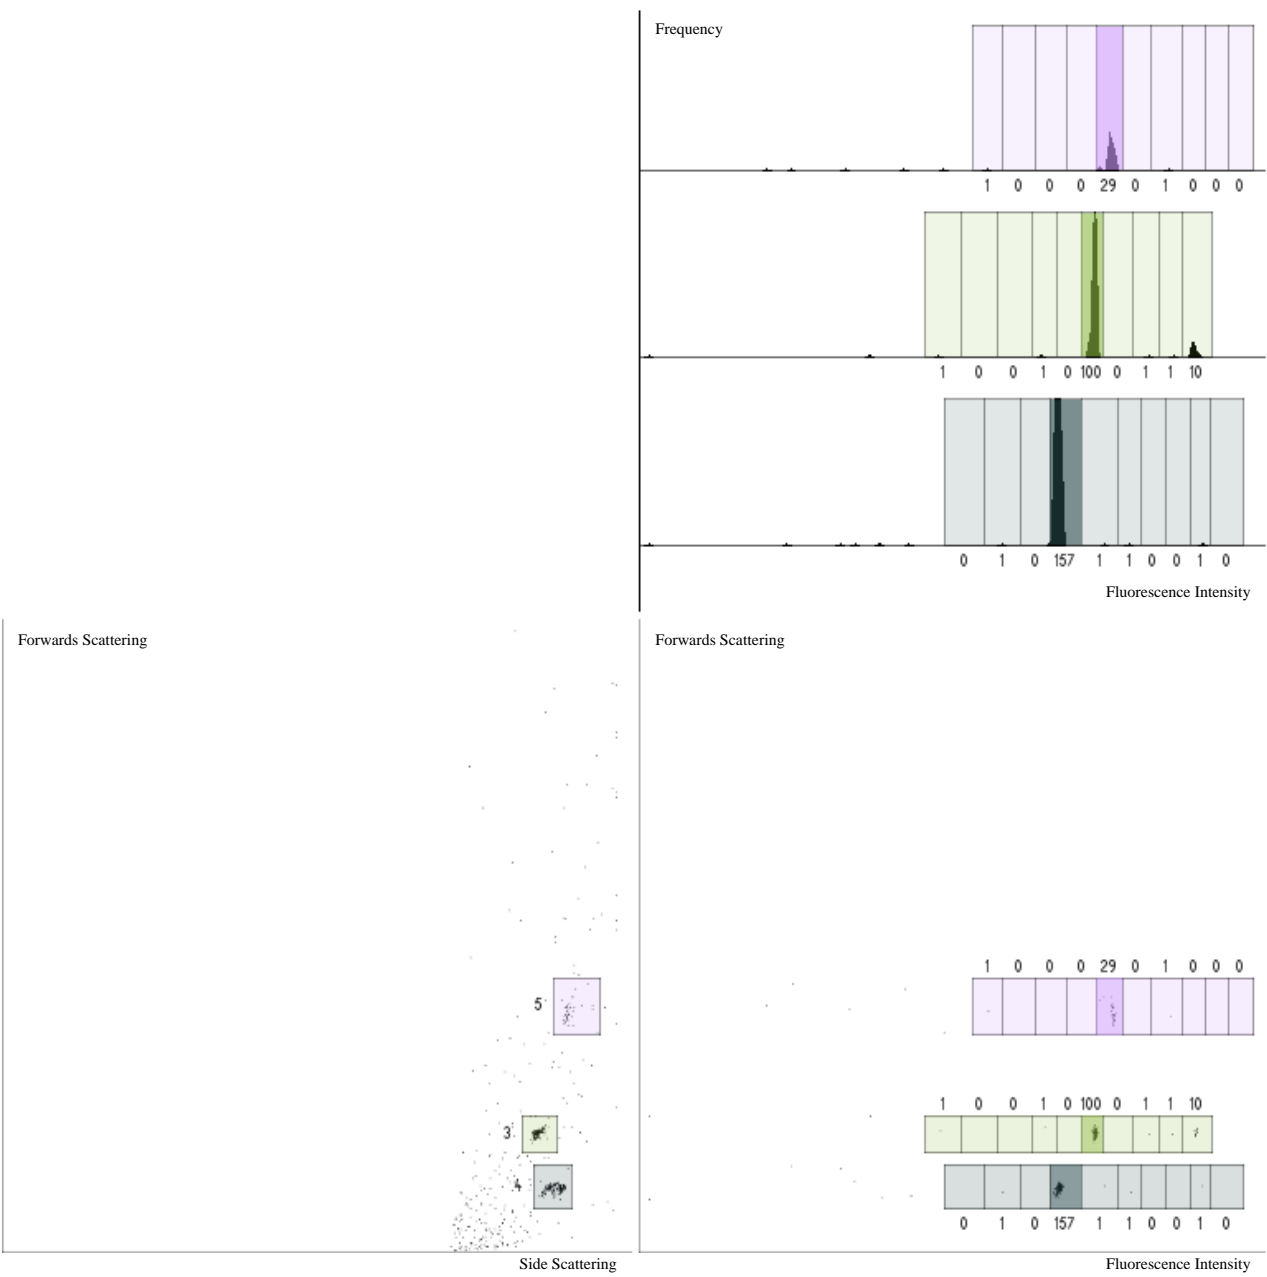

ANNEX 3: TAG DECONVOLUTION - BEAD 331

Passes flow sorting criteria: Yes  
Passes tag deconvolution criteria: Yes  
Included in protocol analysis: Yes  
Protocol: 4, 2, 3, 5  
Filename: Bin5\_plateA0\_C1.fcs  
Split 1: Petrol shading  
Split 2: Green shading  
Split 3: Violet shading

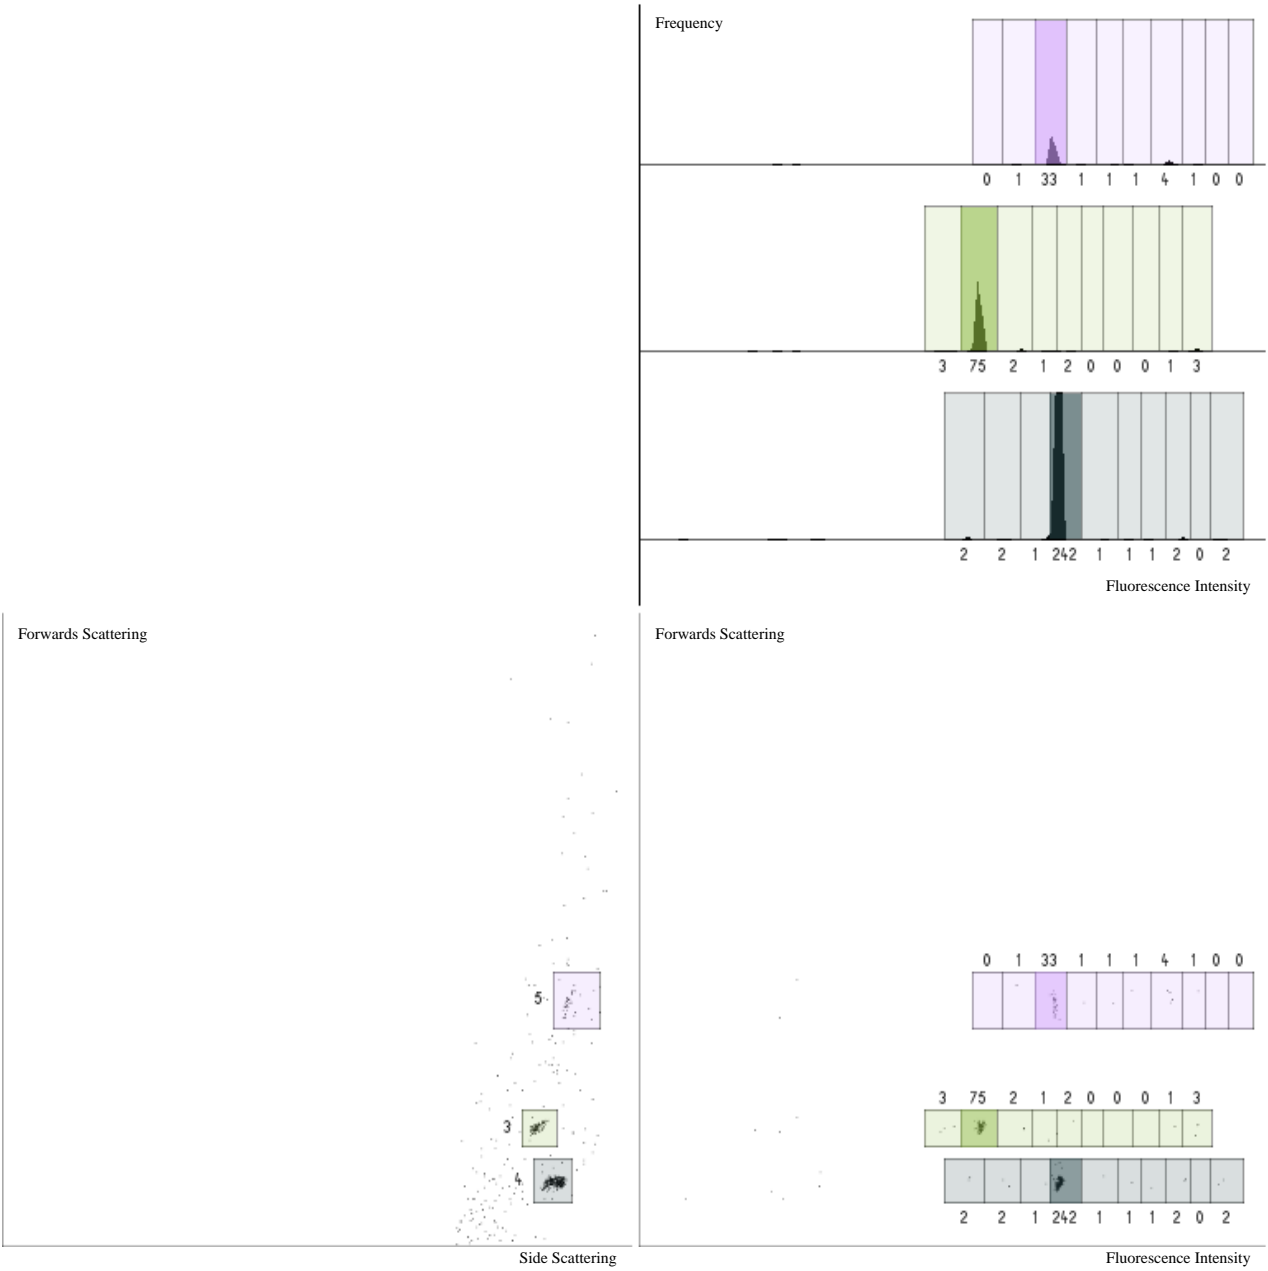

ANNEX 3: TAG DECONVOLUTION - BEAD 332

Passes flow sorting criteria: Yes  
Passes tag deconvolution criteria: No  
Included in protocol analysis: No  
Protocol: N/A  
Filename: Bin5\_plateA0\_C2.fcs  
Split 1: Petrol shading  
Split 2: Green shading  
Split 3: Violet shading

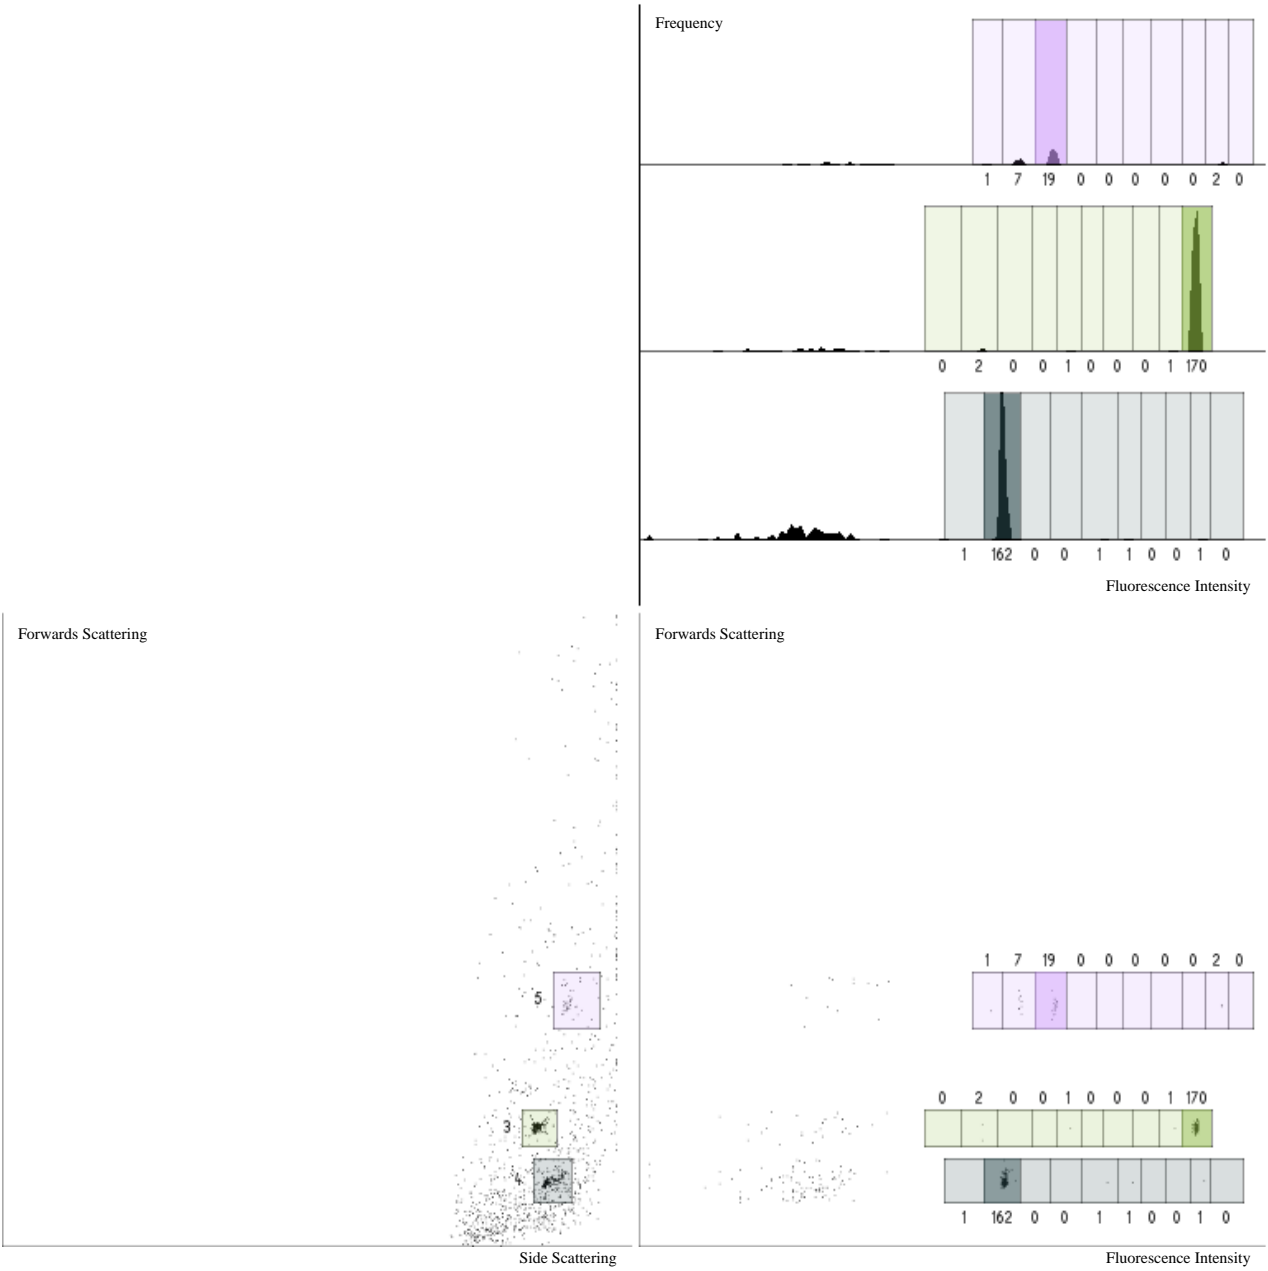

ANNEX 3: TAG DECONVOLUTION - BEAD 333

Passes flow sorting criteria: Yes  
Passes tag deconvolution criteria: No  
Included in protocol analysis: No  
Protocol: N/A  
Filename: Bin5\_plateA0\_C3.fcs  
Split 1: Petrol shading  
Split 2: Green shading  
Split 3: Violet shading

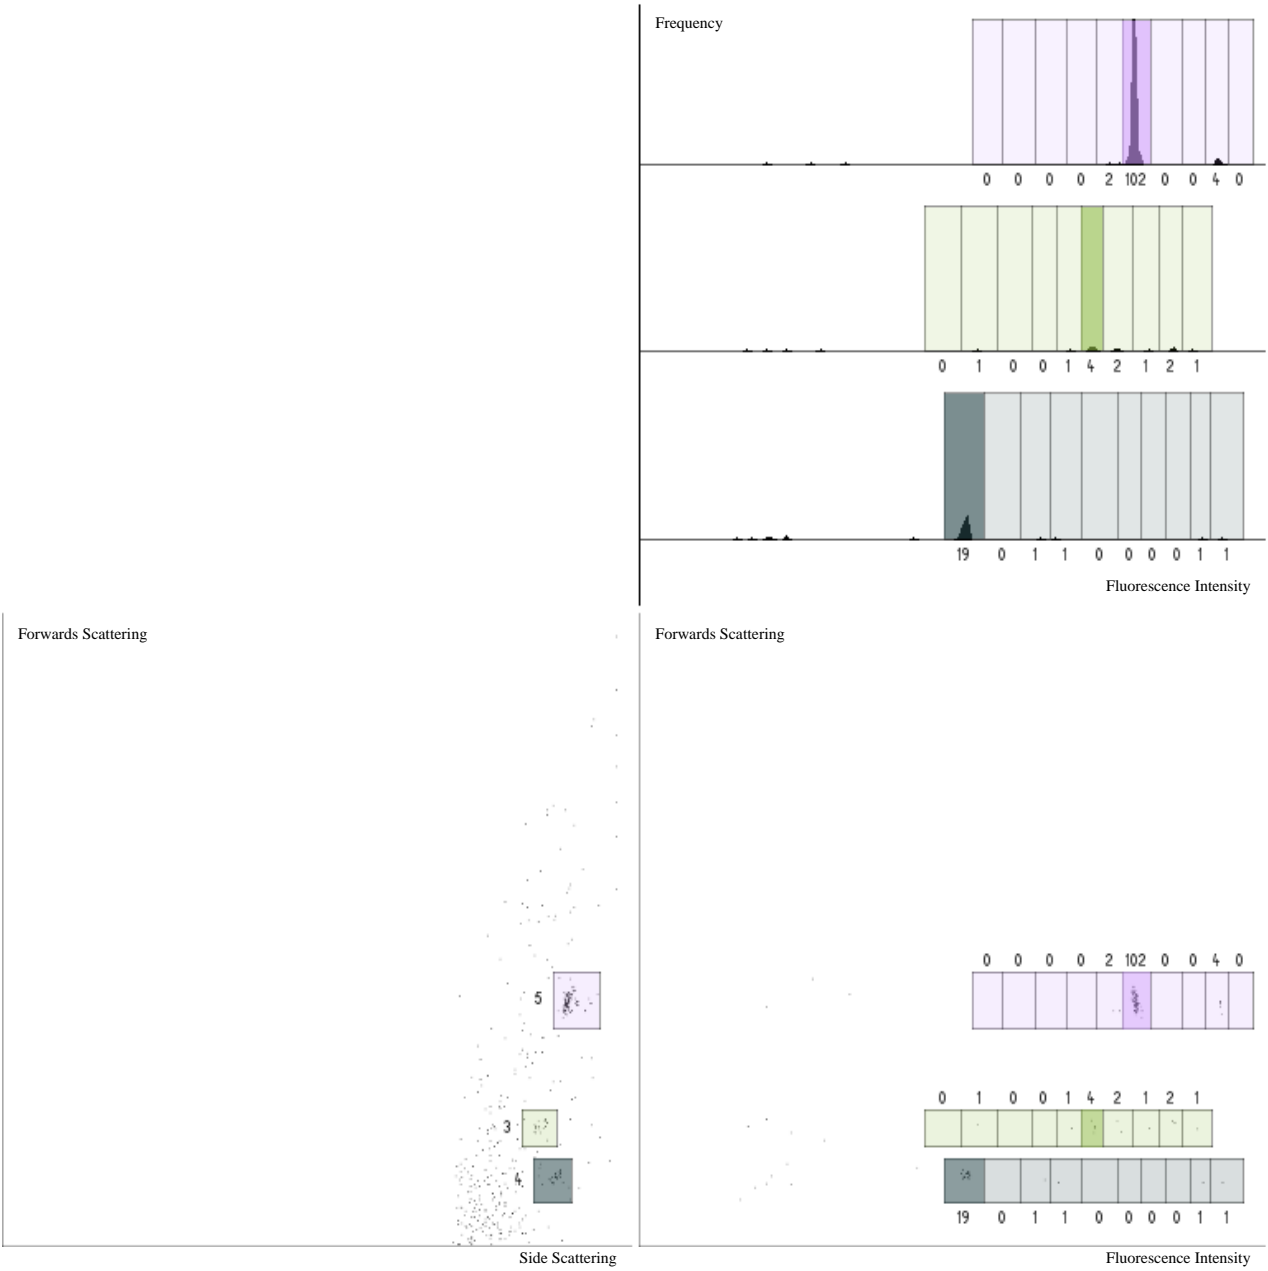

ANNEX 3: TAG DECONVOLUTION - BEAD 334

Passes flow sorting criteria: Yes  
Passes tag deconvolution criteria: Yes  
Included in protocol analysis: Yes  
Protocol: 4, 5, 1, 5  
Filename: Bin5\_plateA0\_C4.fcs  
Split 1: Petrol shading  
Split 2: Green shading  
Split 3: Violet shading

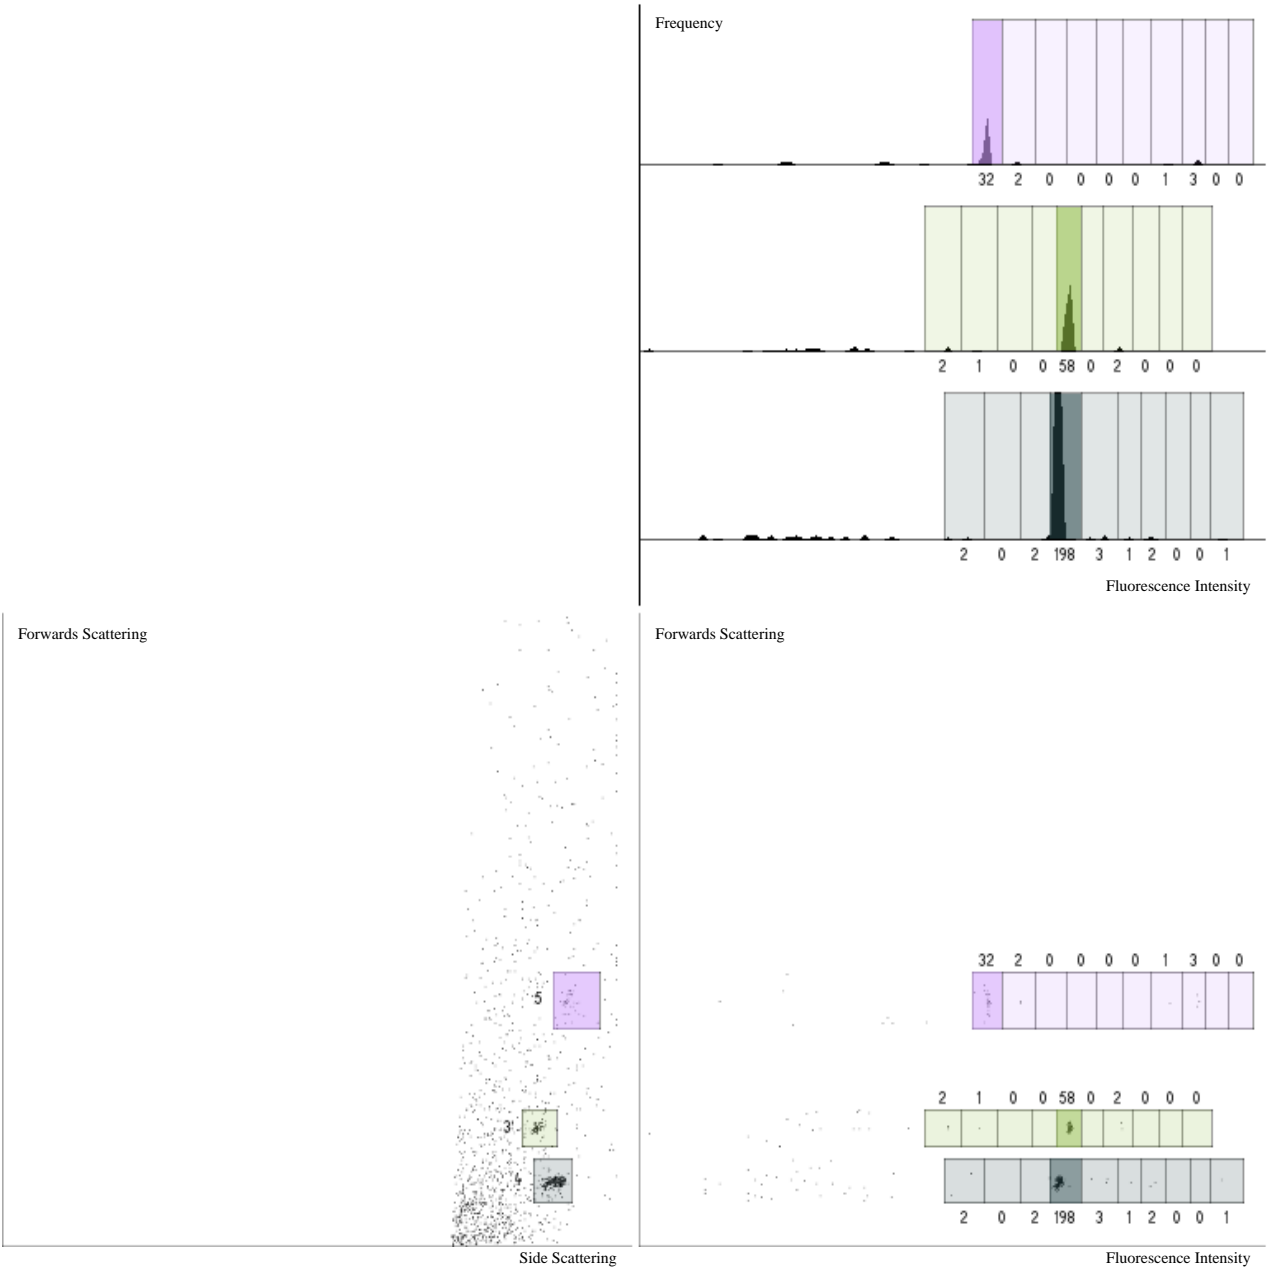



ANNEX 3: TAG DECONVOLUTION - BEAD 335

Passes flow sorting criteria: Yes  
Passes tag deconvolution criteria: No  
Included in protocol analysis: No  
Protocol: N/A  
Filename: Bin5\_plateA0\_C5.fcs  
Split 1: Petrol shading  
Split 2: Green shading  
Split 3: Violet shading

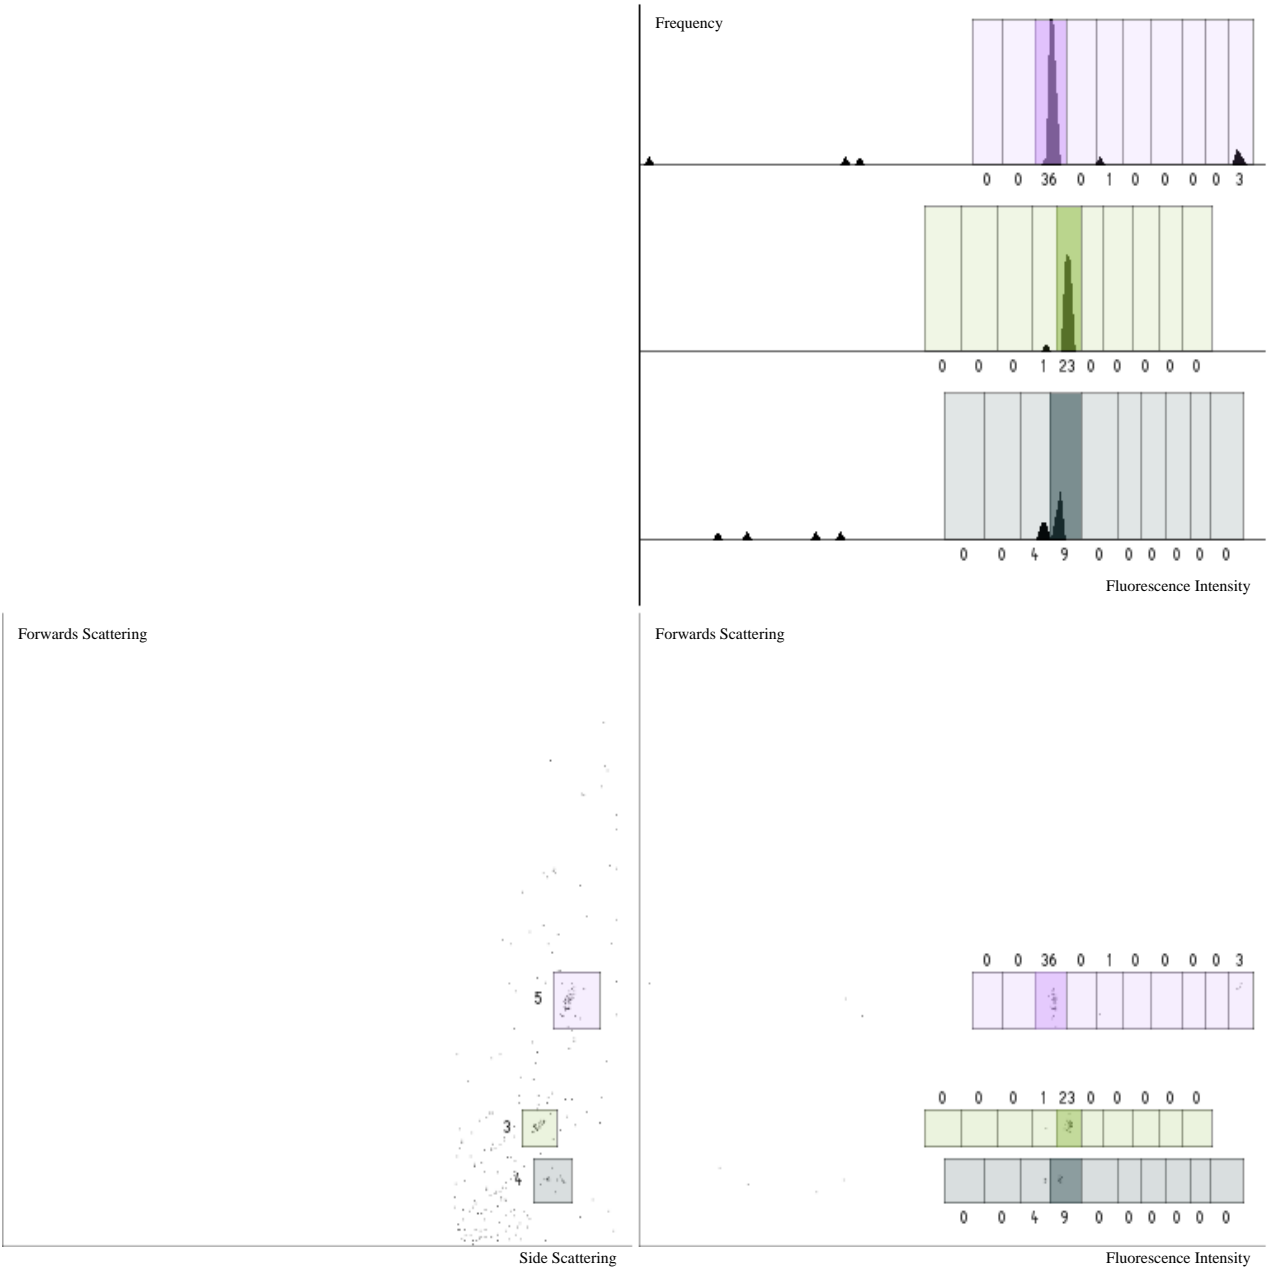

ANNEX 3: TAG DECONVOLUTION - BEAD 336

Passes flow sorting criteria: Yes  
Passes tag deconvolution criteria: No  
Included in protocol analysis: No  
Protocol: N/A  
Filename: Bin5\_plateA0\_C6.fcs  
Split 1: Petrol shading  
Split 2: Green shading  
Split 3: Violet shading

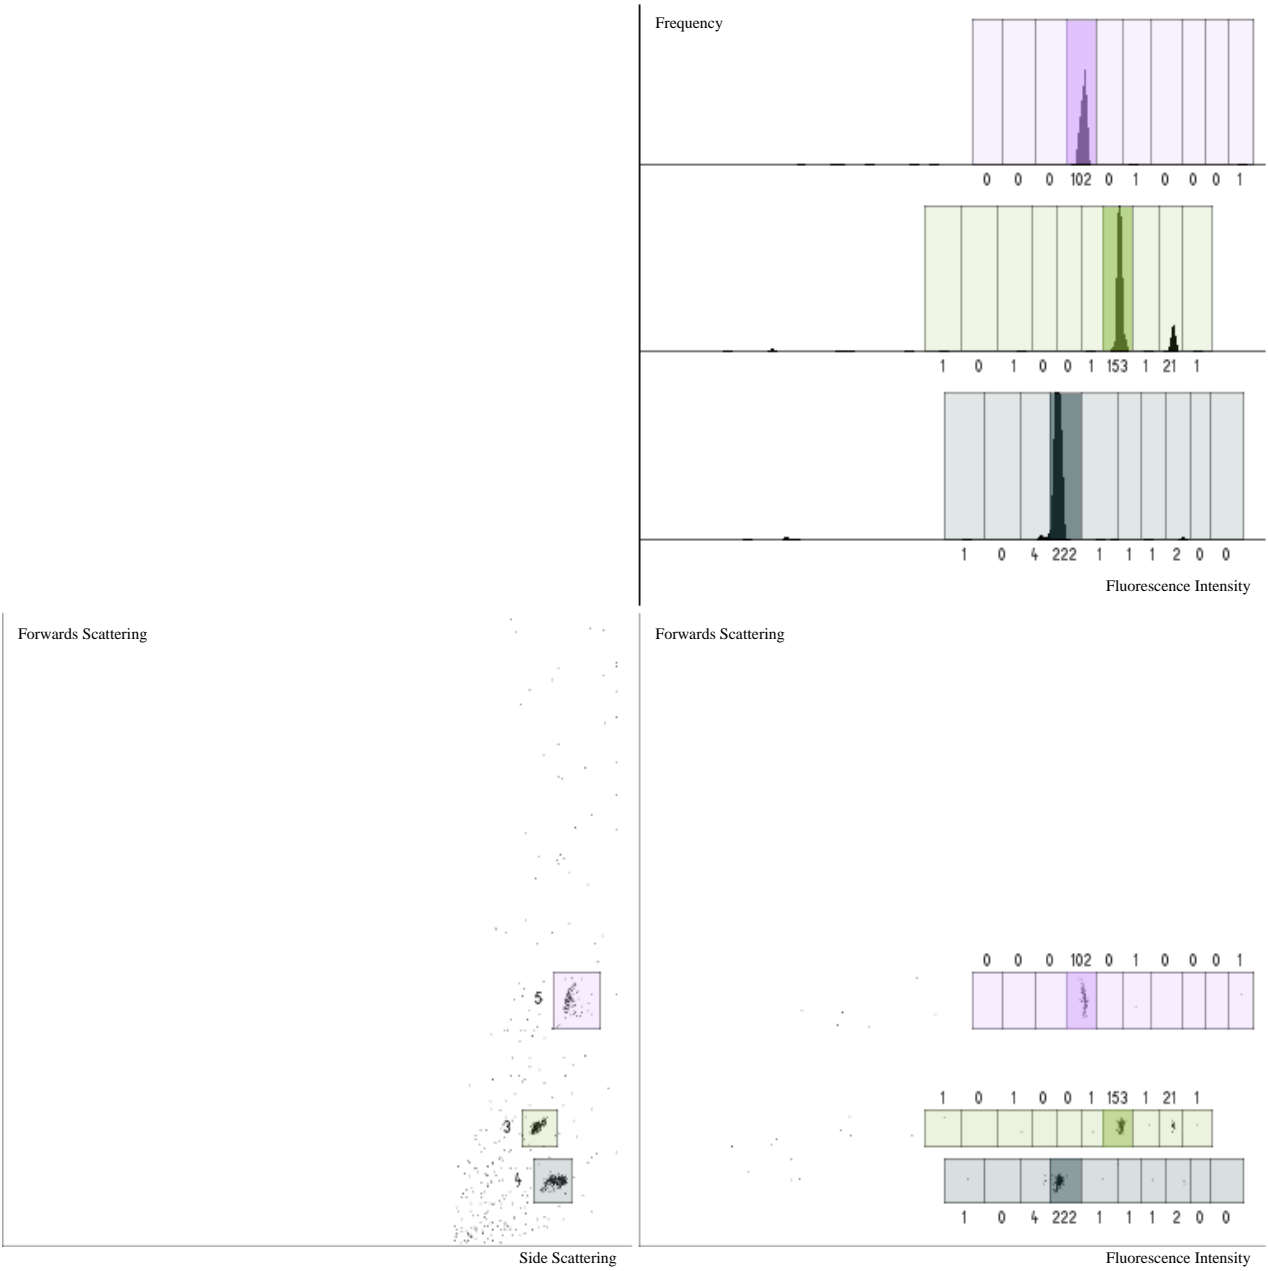

ANNEX 3: TAG DECONVOLUTION - BEAD 337

Passes flow sorting criteria: Yes  
Passes tag deconvolution criteria: Yes  
Included in protocol analysis: Yes  
Protocol: 10, 10, 1, 5  
Filename: Bin5\_plateA0\_C7.fcs  
Split 1: Petrol shading  
Split 2: Green shading  
Split 3: Violet shading

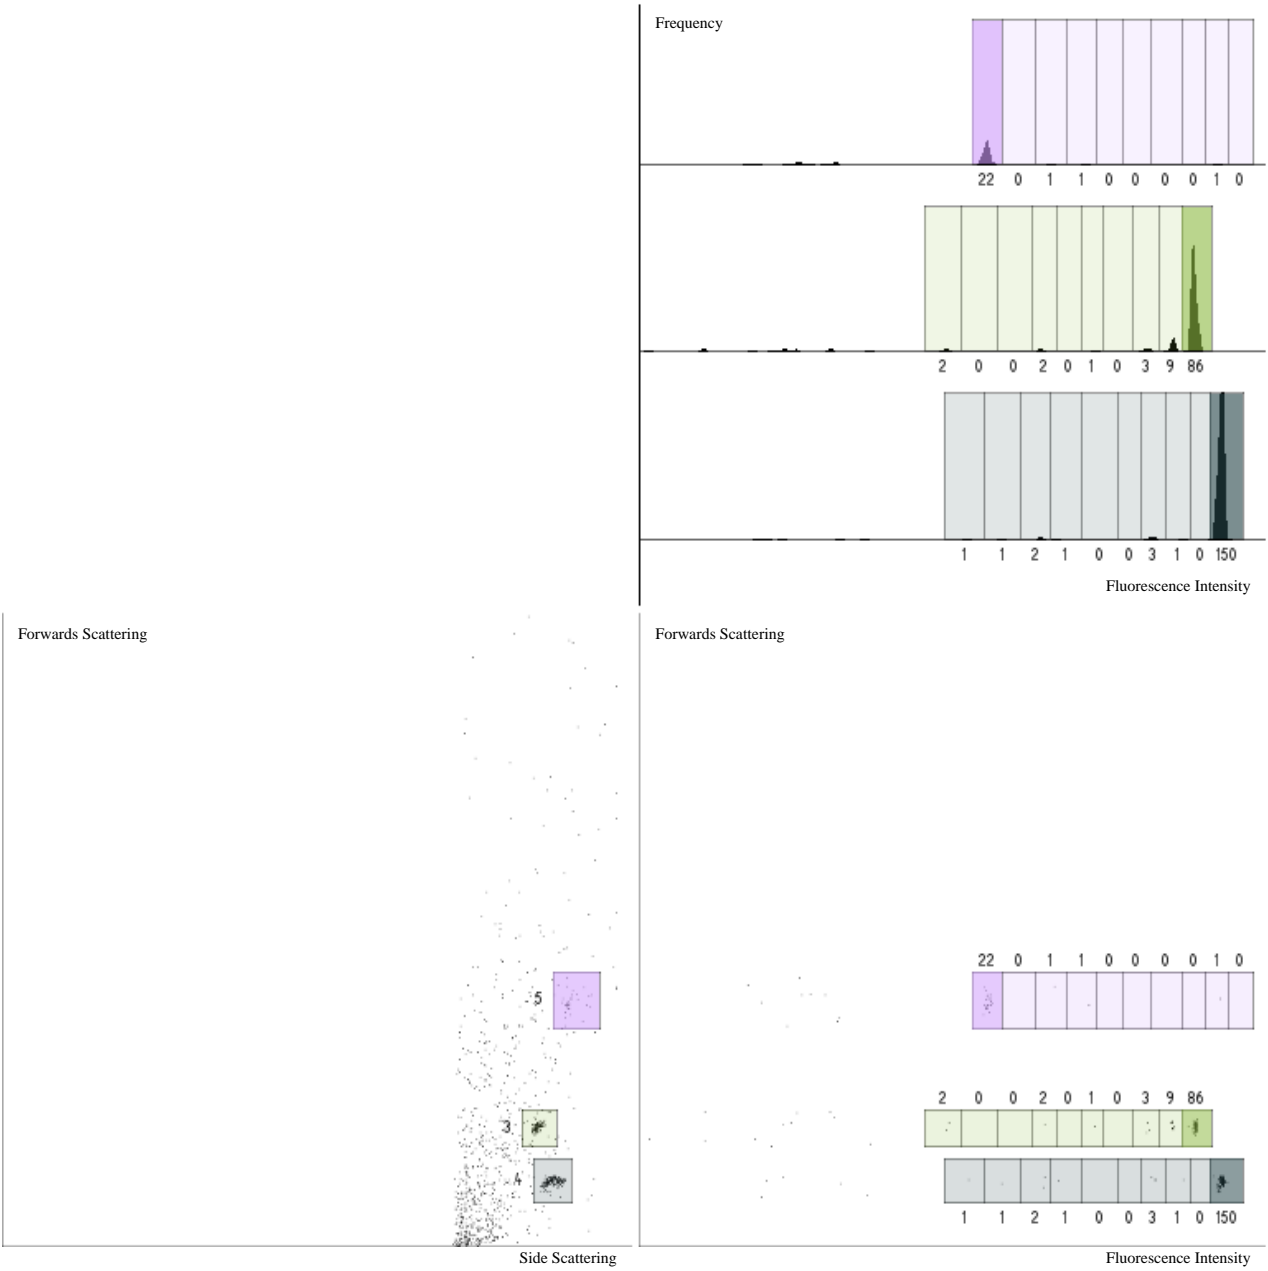

ANNEX 3: TAG DECONVOLUTION - BEAD 338

Passes flow sorting criteria: Yes  
Passes tag deconvolution criteria: Yes  
Included in protocol analysis: Yes  
Protocol: 7, 2, 7, 5  
Filename: Bin5\_plateA0\_G5.fcs  
Split 1: Petrol shading  
Split 2: Green shading  
Split 3: Violet shading

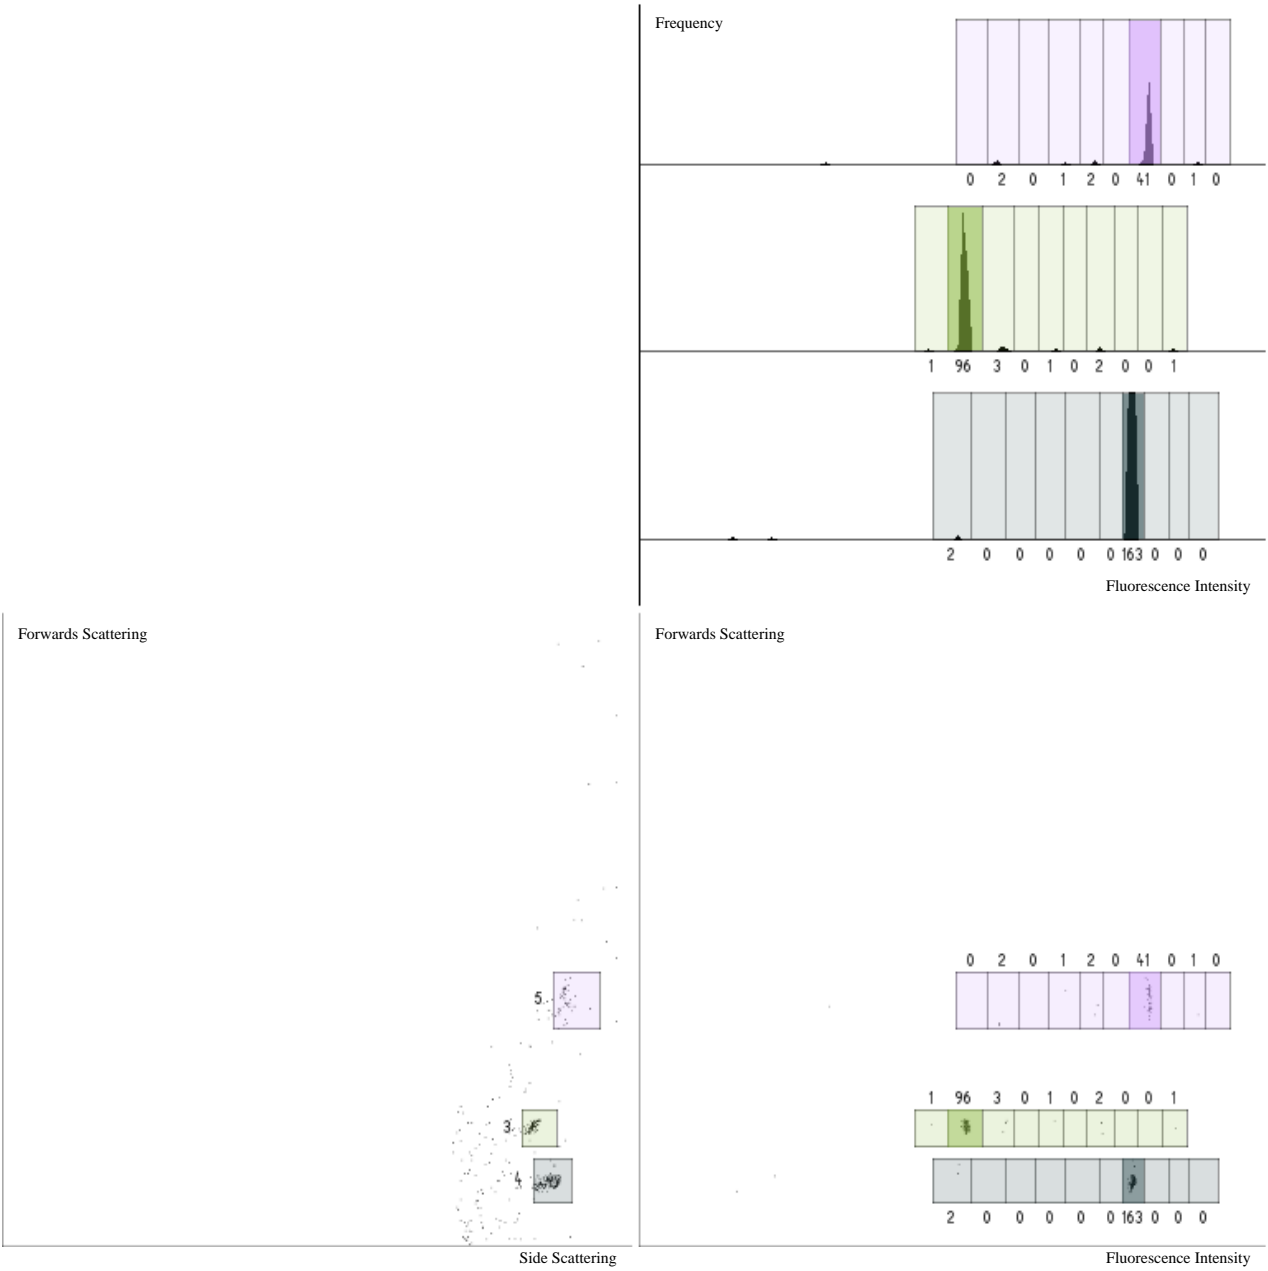

ANNEX 3: TAG DECONVOLUTION - BEAD 339

Passes flow sorting criteria: Yes  
Passes tag deconvolution criteria: Yes  
Included in protocol analysis: Yes  
Protocol: 7, 9, 6, 5  
Filename: Bin5\_plateA0\_C9.fcs  
Split 1: Petrol shading  
Split 2: Green shading  
Split 3: Violet shading

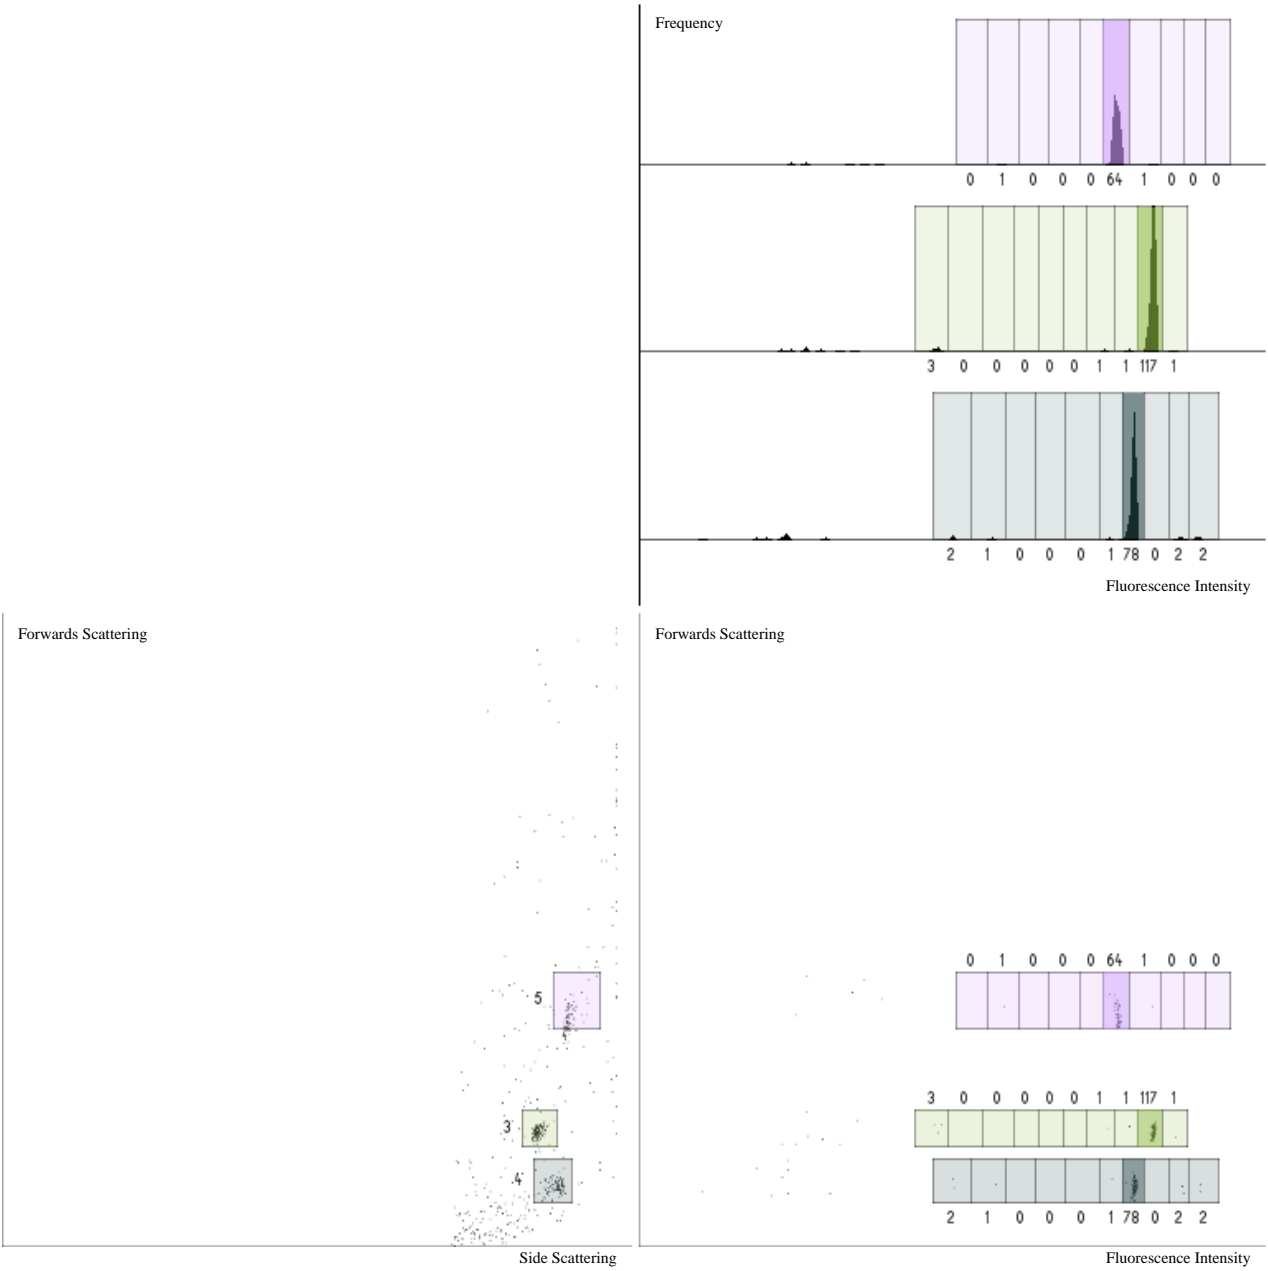

ANNEX 3: TAG DECONVOLUTION - BEAD 340

Passes flow sorting criteria: Yes  
Passes tag deconvolution criteria: Yes  
Included in protocol analysis: Yes  
Protocol: 5, 9, 5, 5  
Filename: Bin5\_plateA0\_C10.fcs  
Split 1: Petrol shading  
Split 2: Green shading  
Split 3: Violet shading

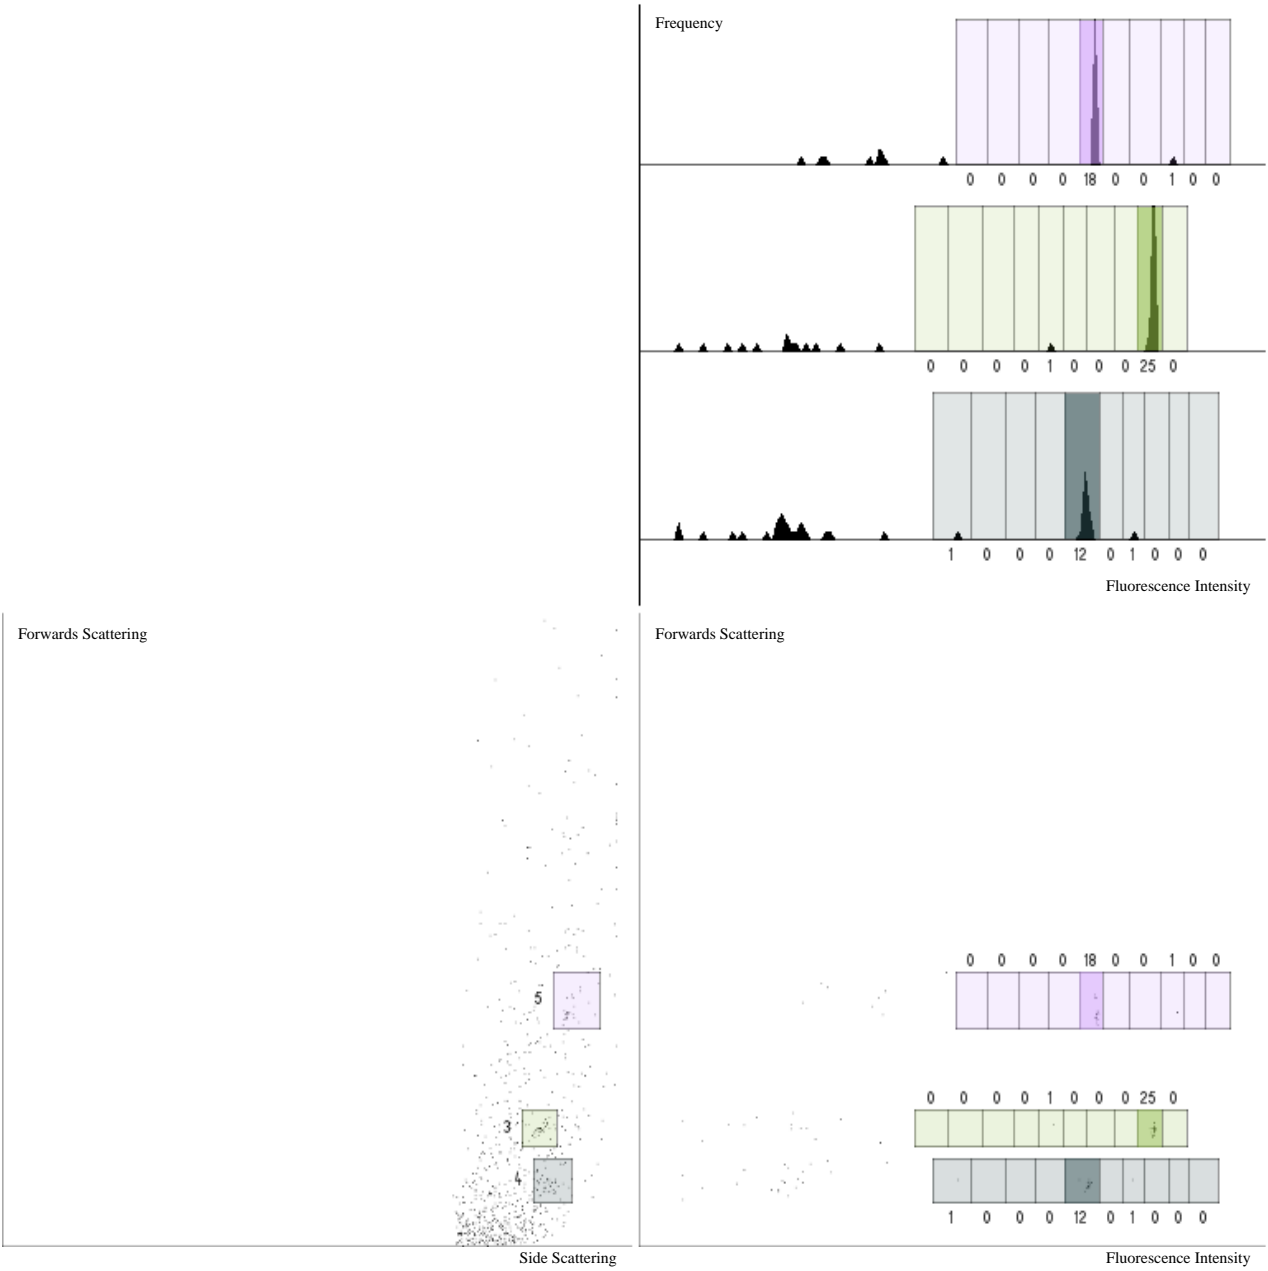

ANNEX 3: TAG DECONVOLUTION - BEAD 341

Passes flow sorting criteria: Yes  
Passes tag deconvolution criteria: Yes  
Included in protocol analysis: Yes  
Protocol: 2, 7, 7, 5  
Filename: Bin5\_plateA0\_C11.fcs  
Split 1: Petrol shading  
Split 2: Green shading  
Split 3: Violet shading

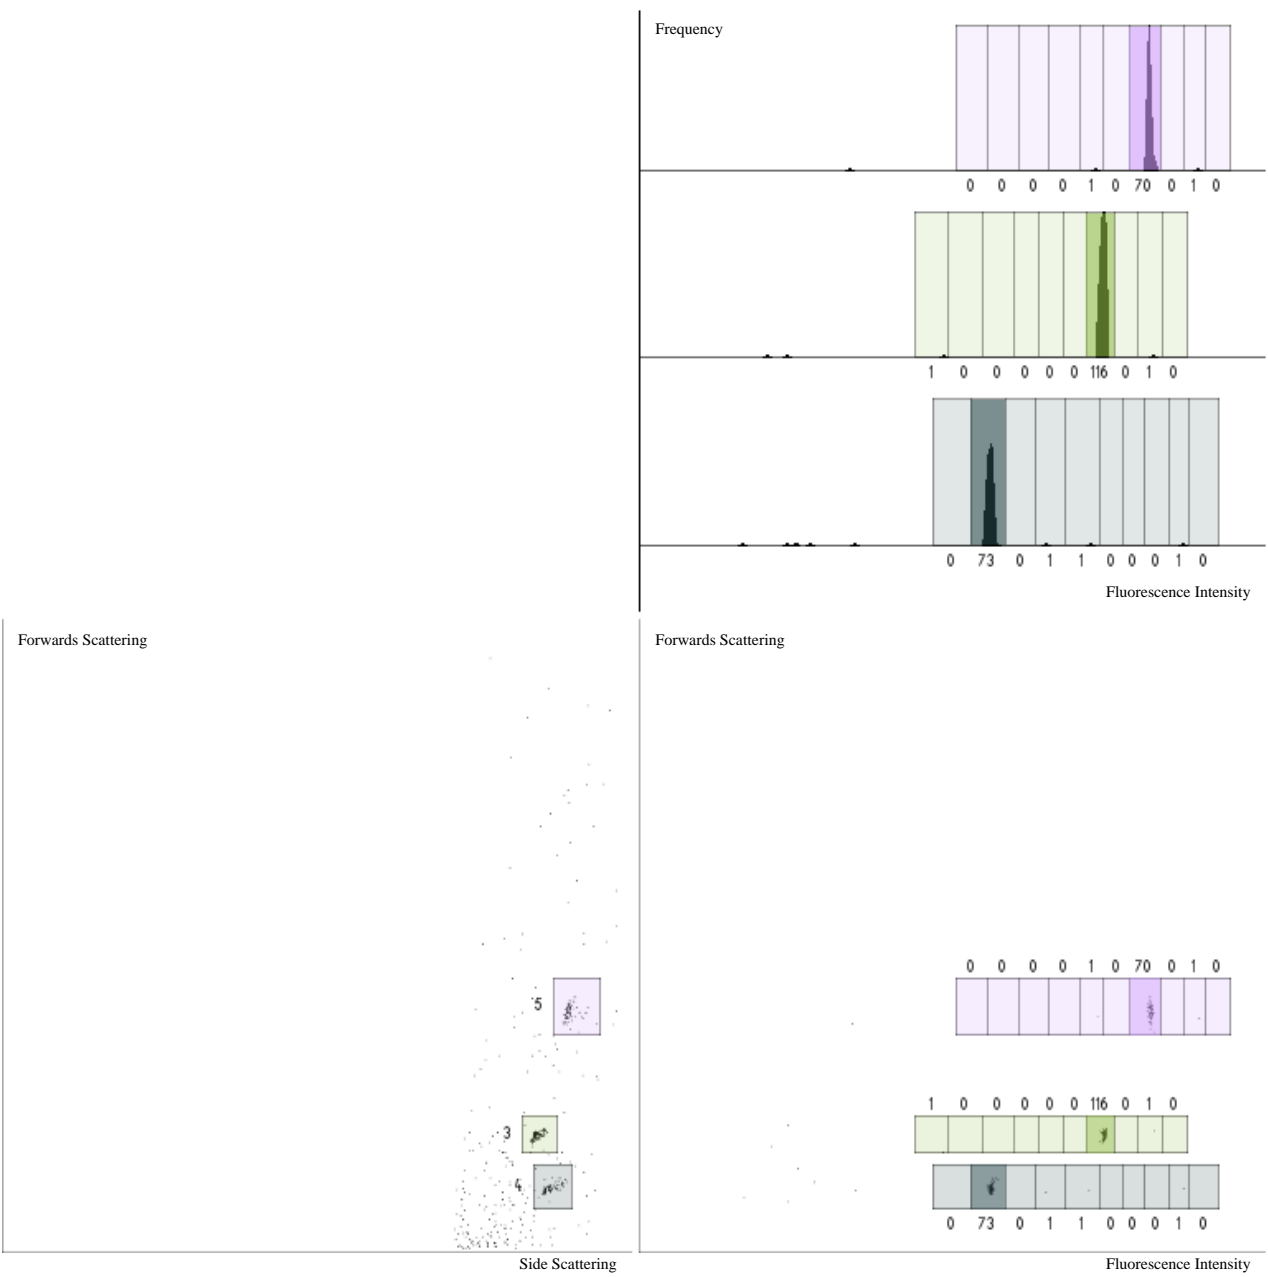

ANNEX 3: TAG DECONVOLUTION - BEAD 342

Passes flow sorting criteria: Yes  
Passes tag deconvolution criteria: Yes  
Included in protocol analysis: Yes  
Protocol: 1, 6, 6, 5  
Filename: Bin5\_plateA0\_D1.fcs  
Split 1: Petrol shading  
Split 2: Green shading  
Split 3: Violet shading

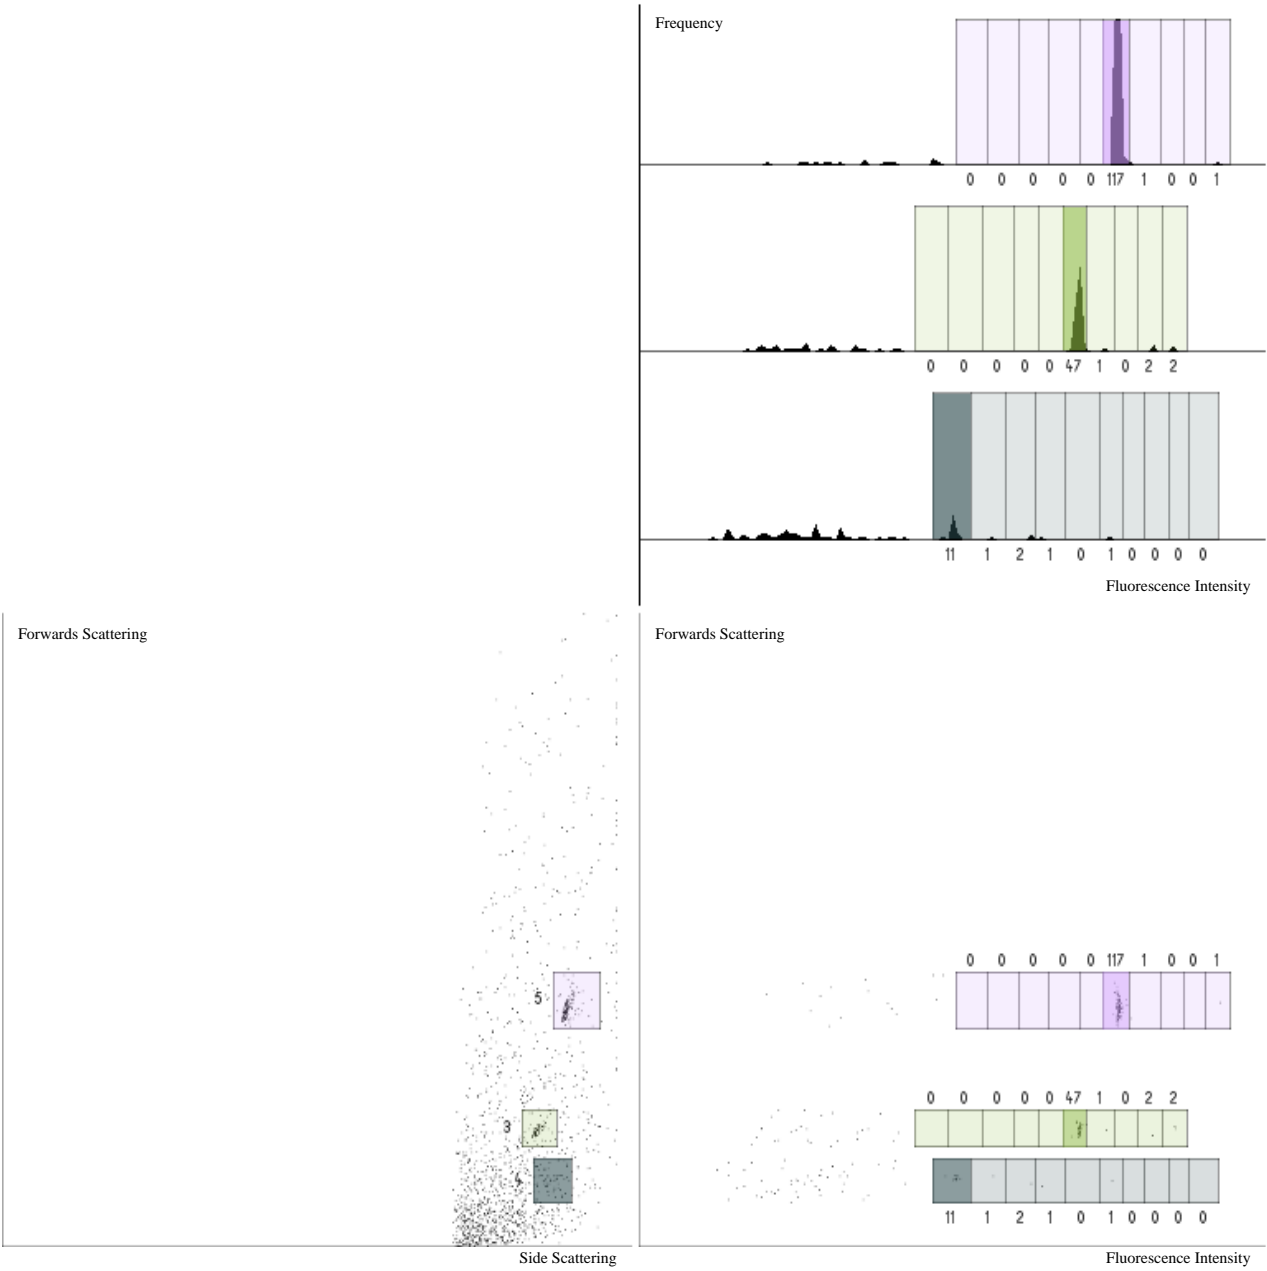



ANNEX 3: TAG DECONVOLUTION - BEAD 343

Passes flow sorting criteria: Yes  
Passes tag deconvolution criteria: Yes  
Included in protocol analysis: Yes  
Protocol: 6, 10, 10, 5  
Filename: Bin5\_plateA0\_D2.fcs  
Split 1: Petrol shading  
Split 2: Green shading  
Split 3: Violet shading

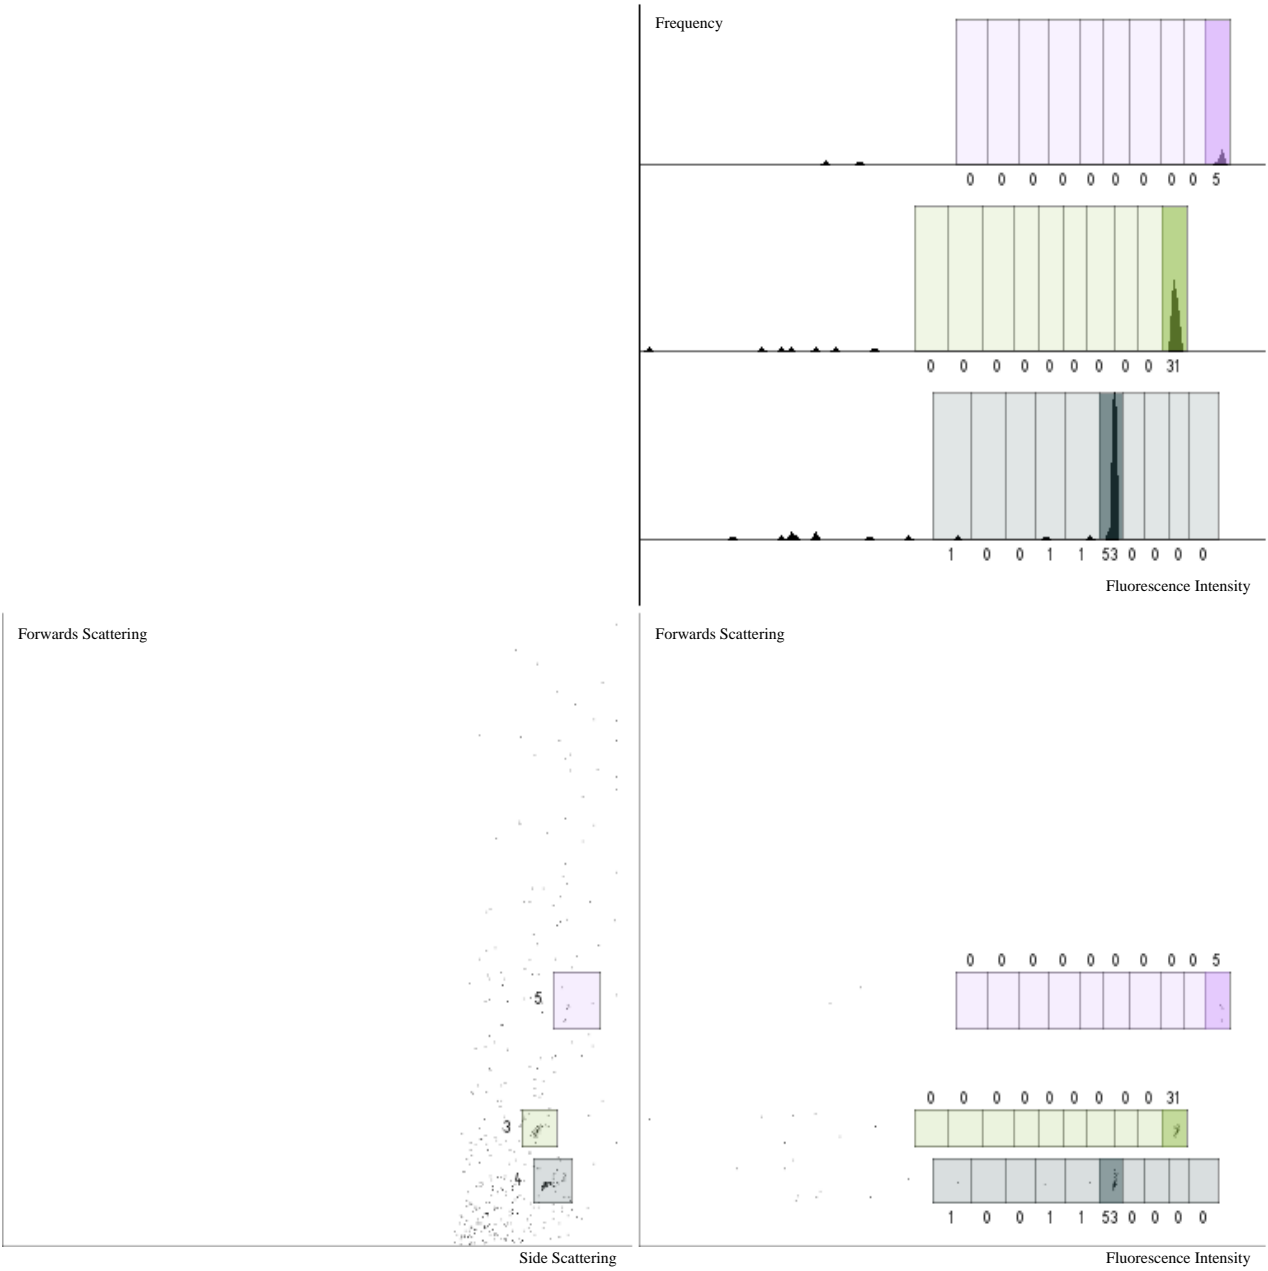

ANNEX 3: TAG DECONVOLUTION - BEAD 344

Passes flow sorting criteria: Yes  
Passes tag deconvolution criteria: Yes  
Included in protocol analysis: Yes  
Protocol: 10, 6, 2, 5  
Filename: Bin5\_plateA0\_D3.fcs  
Split 1: Petrol shading  
Split 2: Green shading  
Split 3: Violet shading

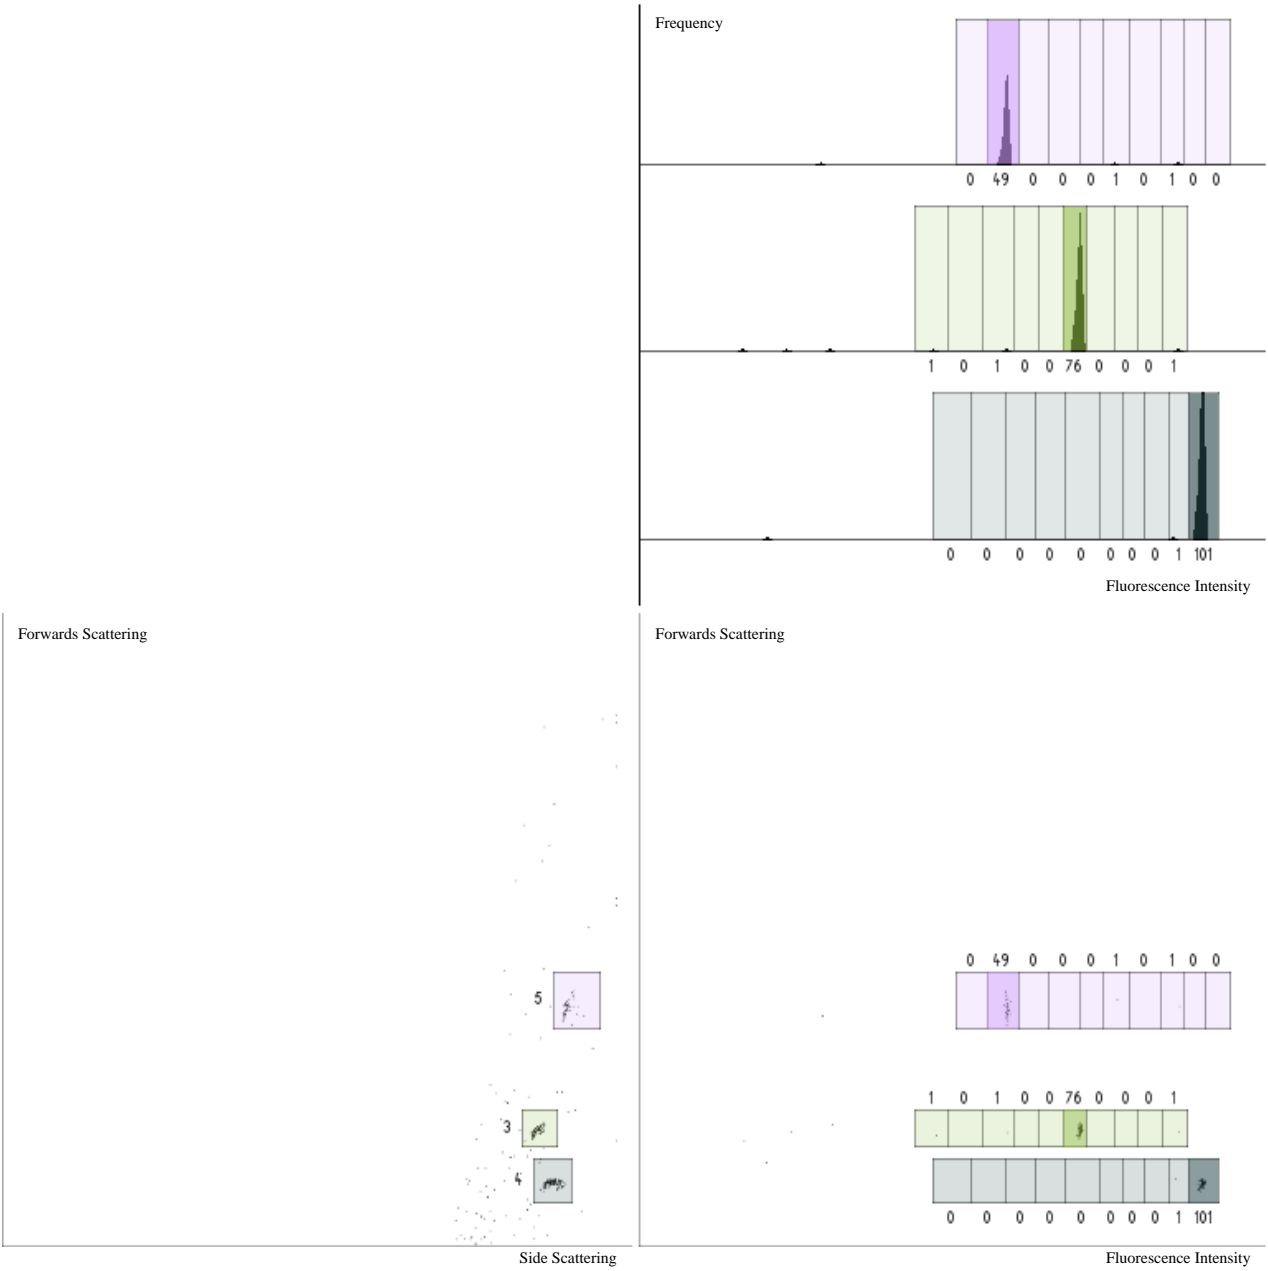

Passes flow sorting criteria: Yes  
 Passes tag deconvolution criteria: Yes  
 Included in protocol analysis: Yes  
 Protocol: 4, 9, 8, 5  
 Filename: Bin5\_plateA0\_D4.fcs  
 Split 1: Petrol shading  
 Split 2: Green shading  
 Split 3: Violet shading

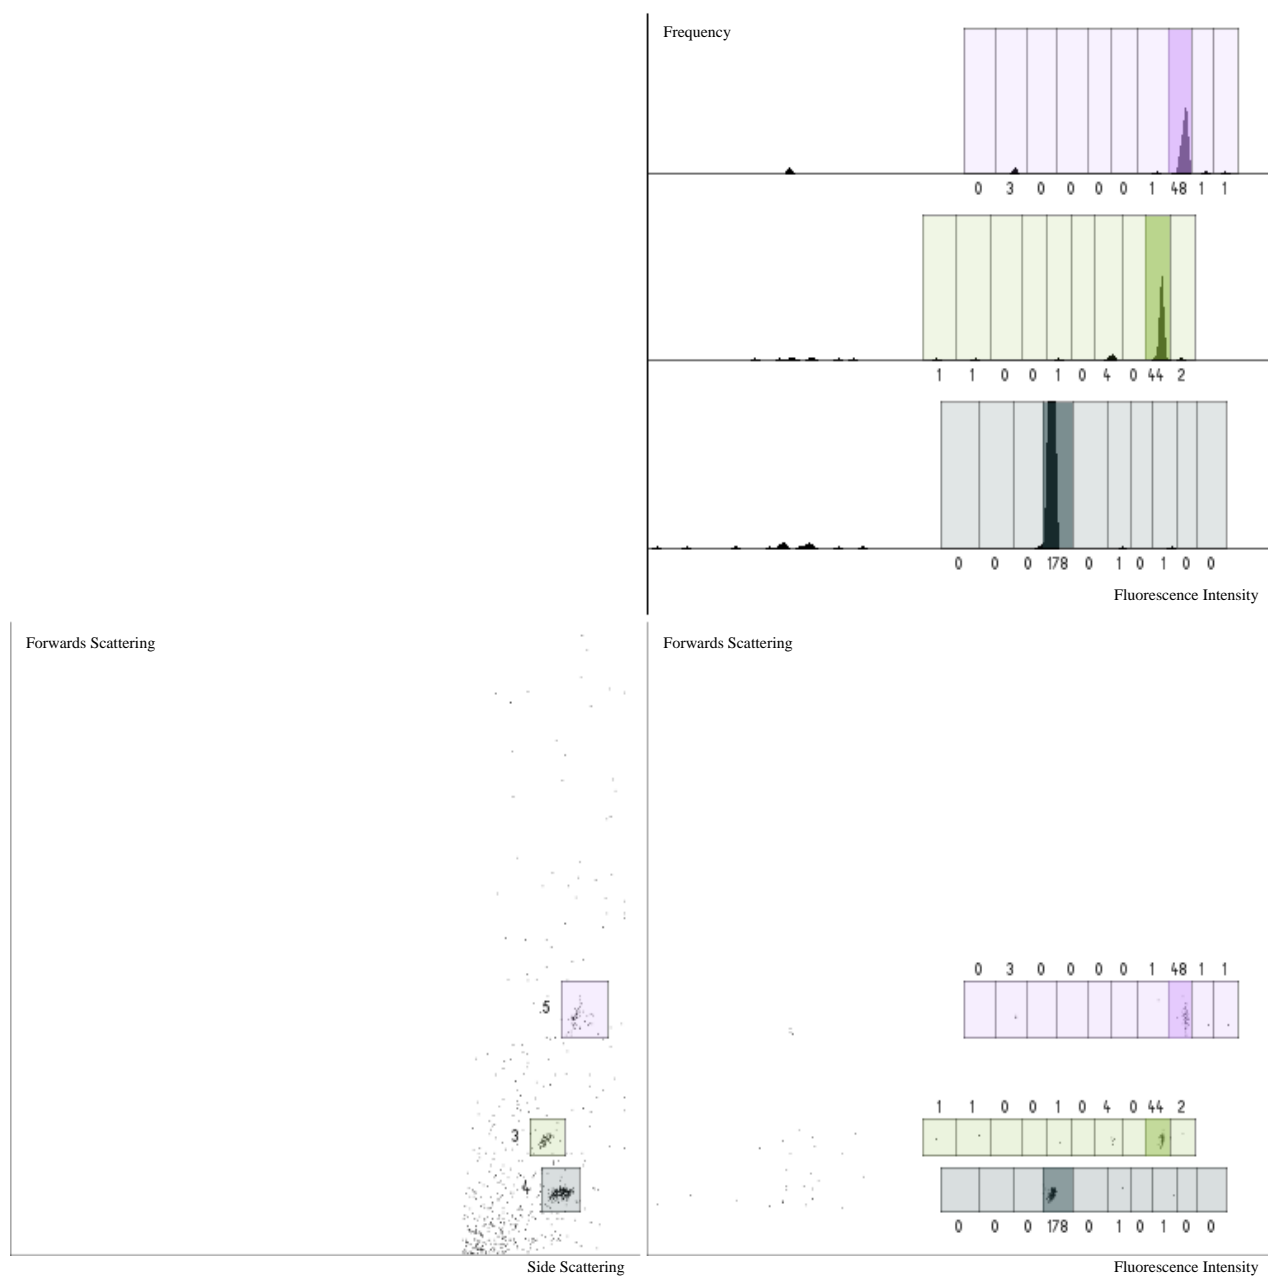

ANNEX 3: TAG DECONVOLUTION - BEAD 346

Passes flow sorting criteria: Yes  
Passes tag deconvolution criteria: No  
Included in protocol analysis: No  
Protocol: N/A  
Filename: Bin5\_plateA0\_D5.fcs  
Split 1: Petrol shading  
Split 2: Green shading  
Split 3: Violet shading

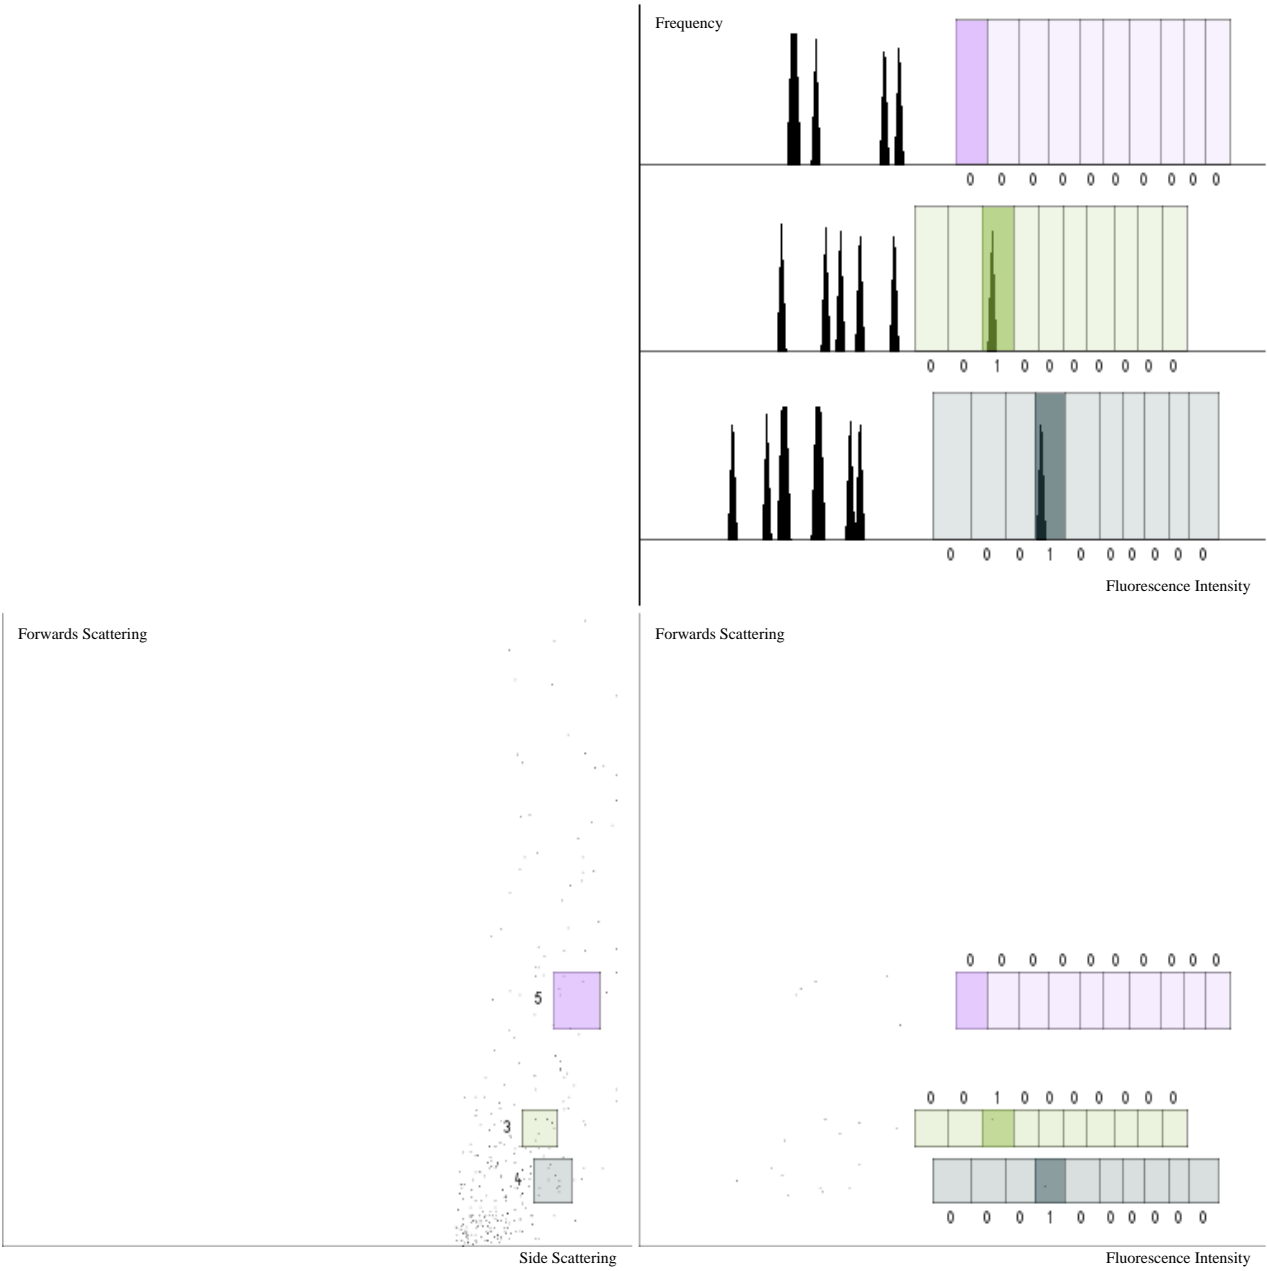

ANNEX 3: TAG DECONVOLUTION - BEAD 347

Passes flow sorting criteria: Yes  
Passes tag deconvolution criteria: Yes  
Included in protocol analysis: Yes  
Protocol: 5, 2, 6, 5  
Filename: Bin5\_plateA0\_D6.fcs  
Split 1: Petrol shading  
Split 2: Green shading  
Split 3: Violet shading

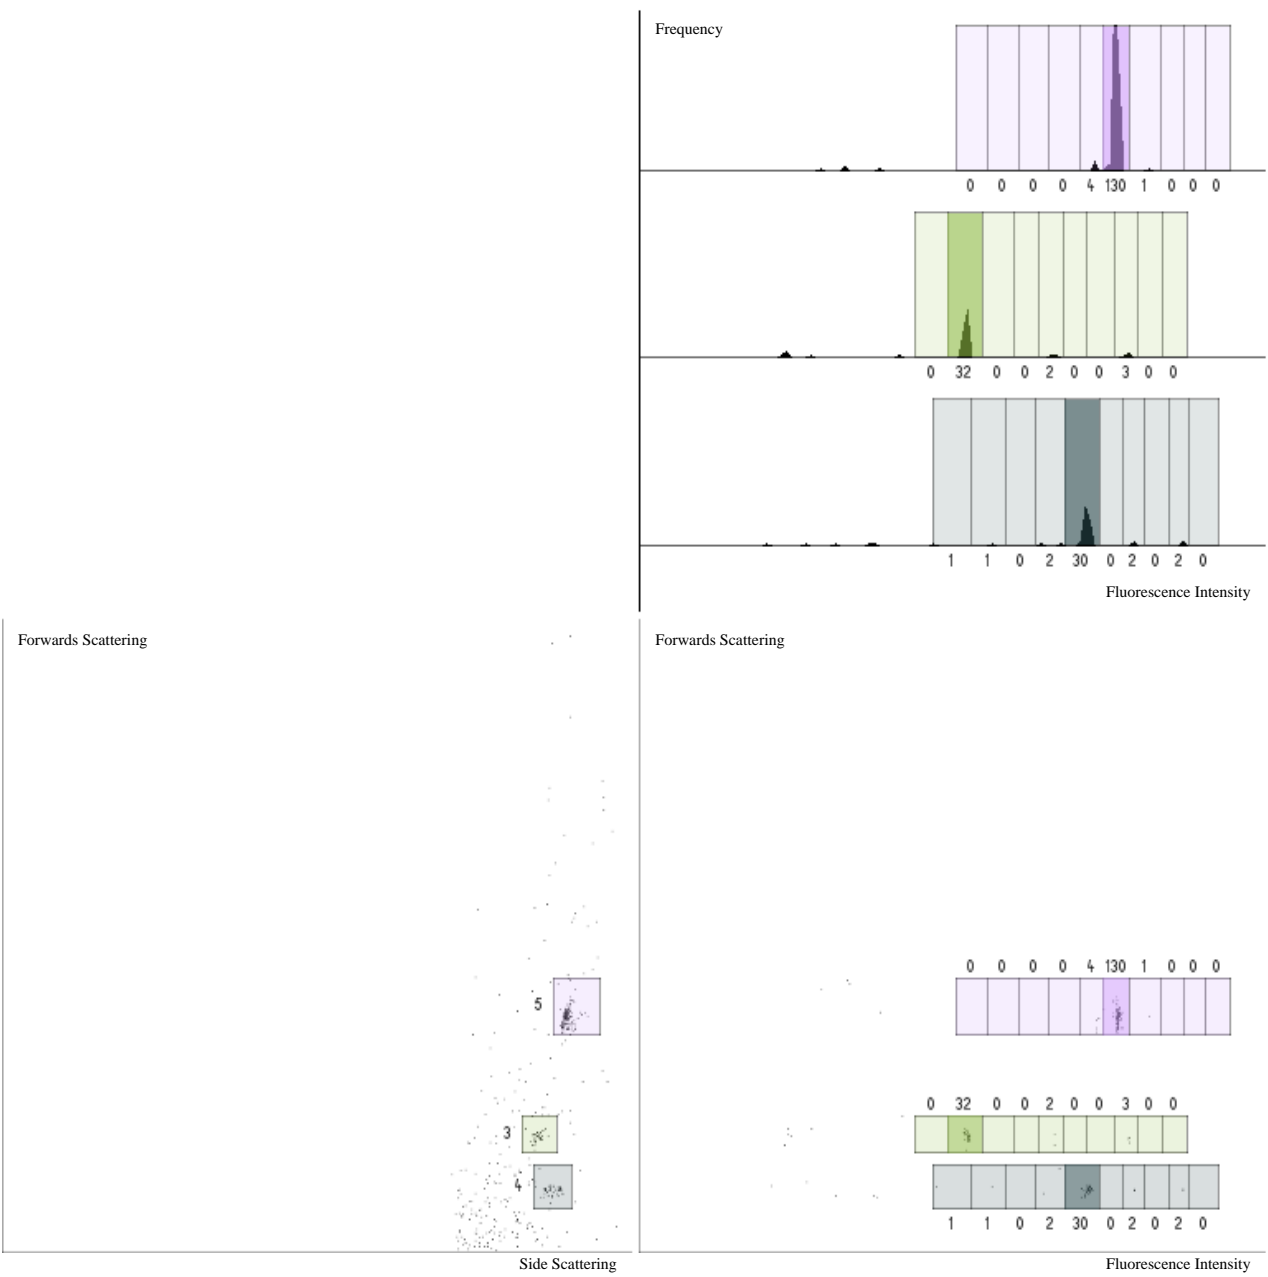

ANNEX 3: TAG DECONVOLUTION - BEAD 348

Passes flow sorting criteria: Yes  
Passes tag deconvolution criteria: Yes  
Included in protocol analysis: Yes  
Protocol: 7, 9, 9, 5  
Filename: Bin5\_plateA0\_D7.fcs  
Split 1: Petrol shading  
Split 2: Green shading  
Split 3: Violet shading

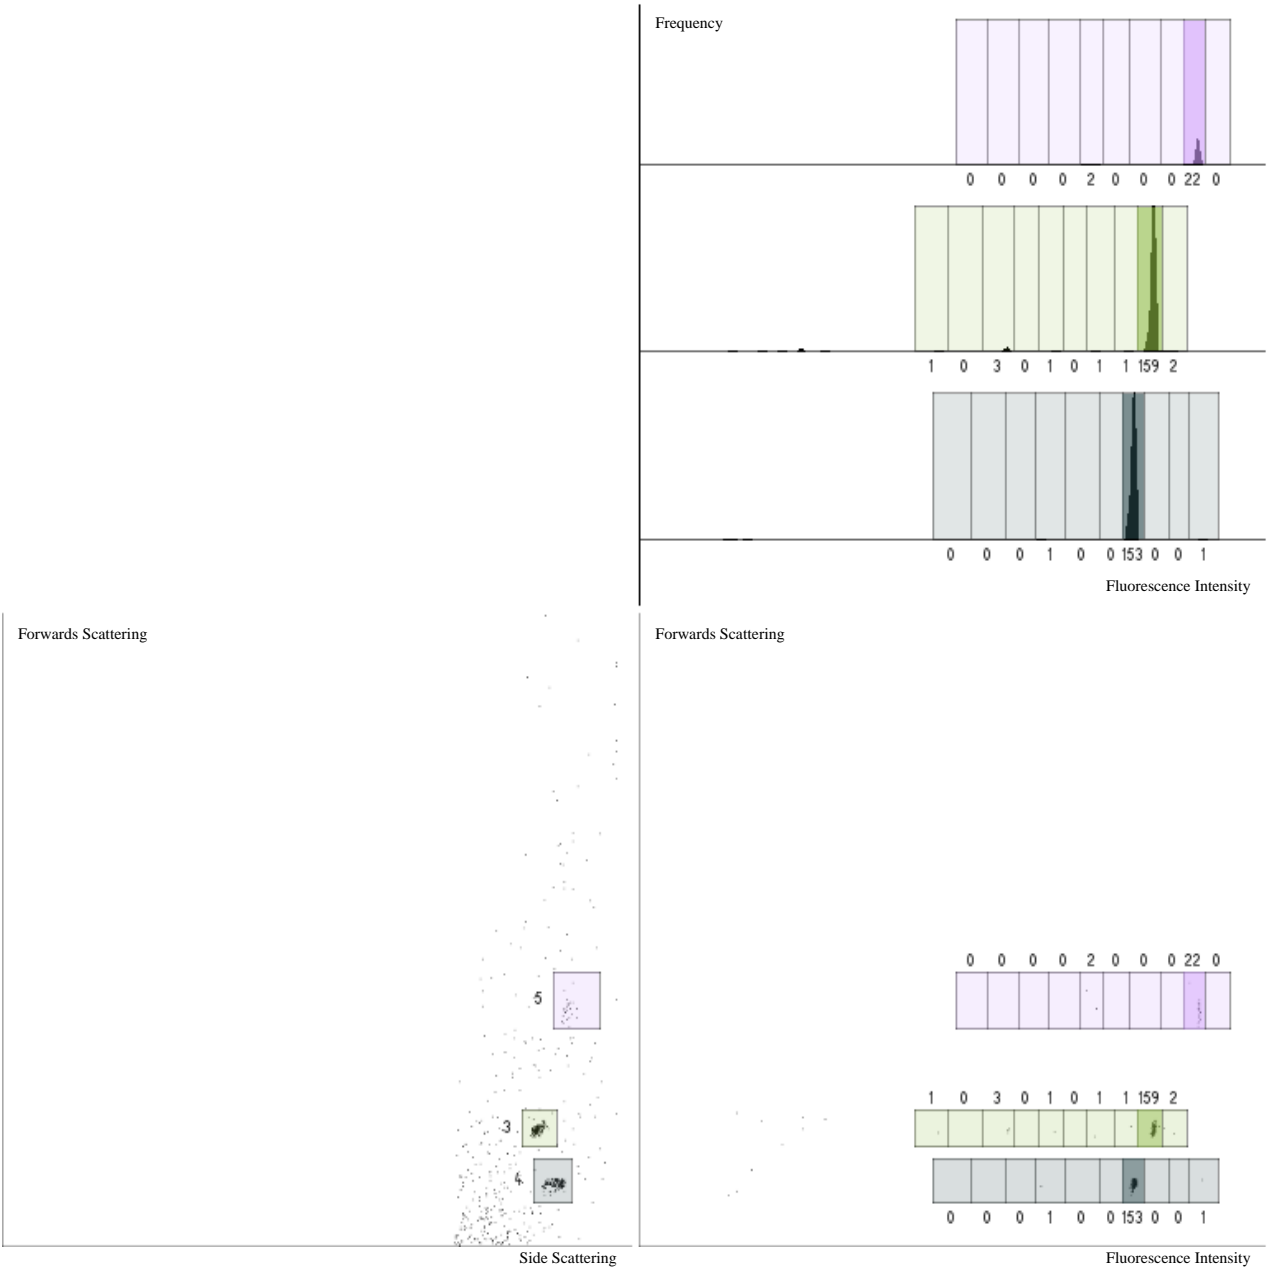

ANNEX 3: TAG DECONVOLUTION - BEAD 349

Passes flow sorting criteria: Yes  
Passes tag deconvolution criteria: Yes  
Included in protocol analysis: Yes  
Protocol: 10, 1, 6, 5  
Filename: Bin5\_plateA0\_D8.fcs  
Split 1: Petrol shading  
Split 2: Green shading  
Split 3: Violet shading

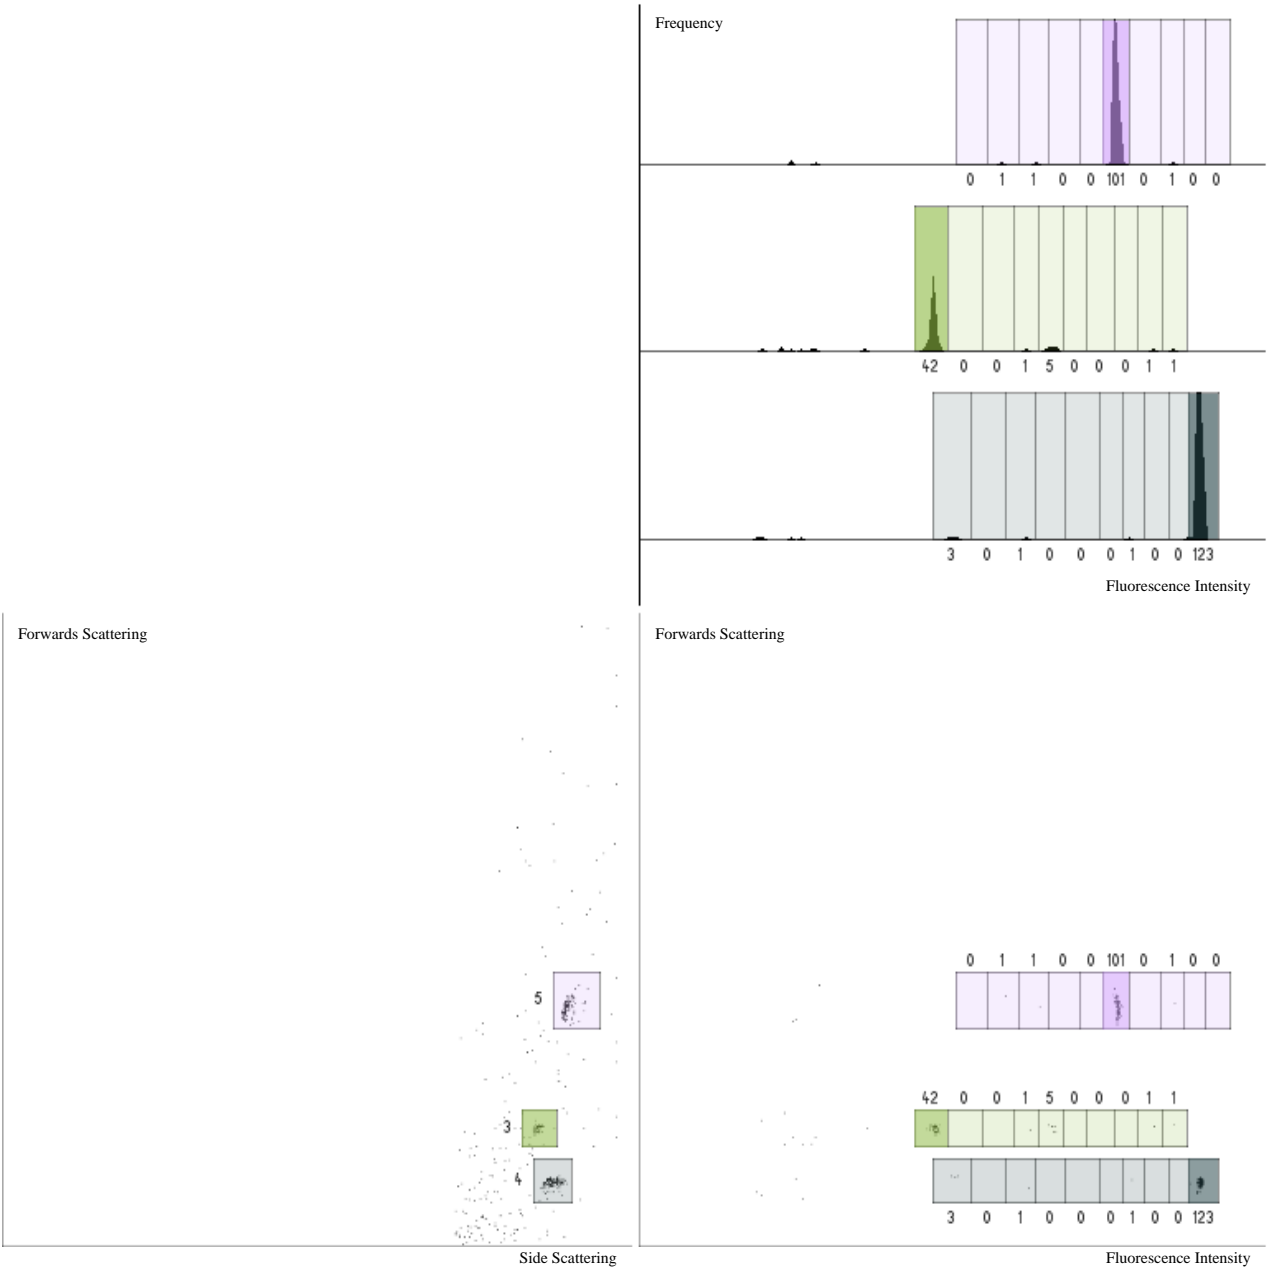

ANNEX 3: TAG DECONVOLUTION - BEAD 350

Passes flow sorting criteria: Yes  
Passes tag deconvolution criteria: Yes  
Included in protocol analysis: Yes  
Protocol: 5, 9, 9, 5  
Filename: Bin5\_plateA0\_D9.fcs  
Split 1: Petrol shading  
Split 2: Green shading  
Split 3: Violet shading

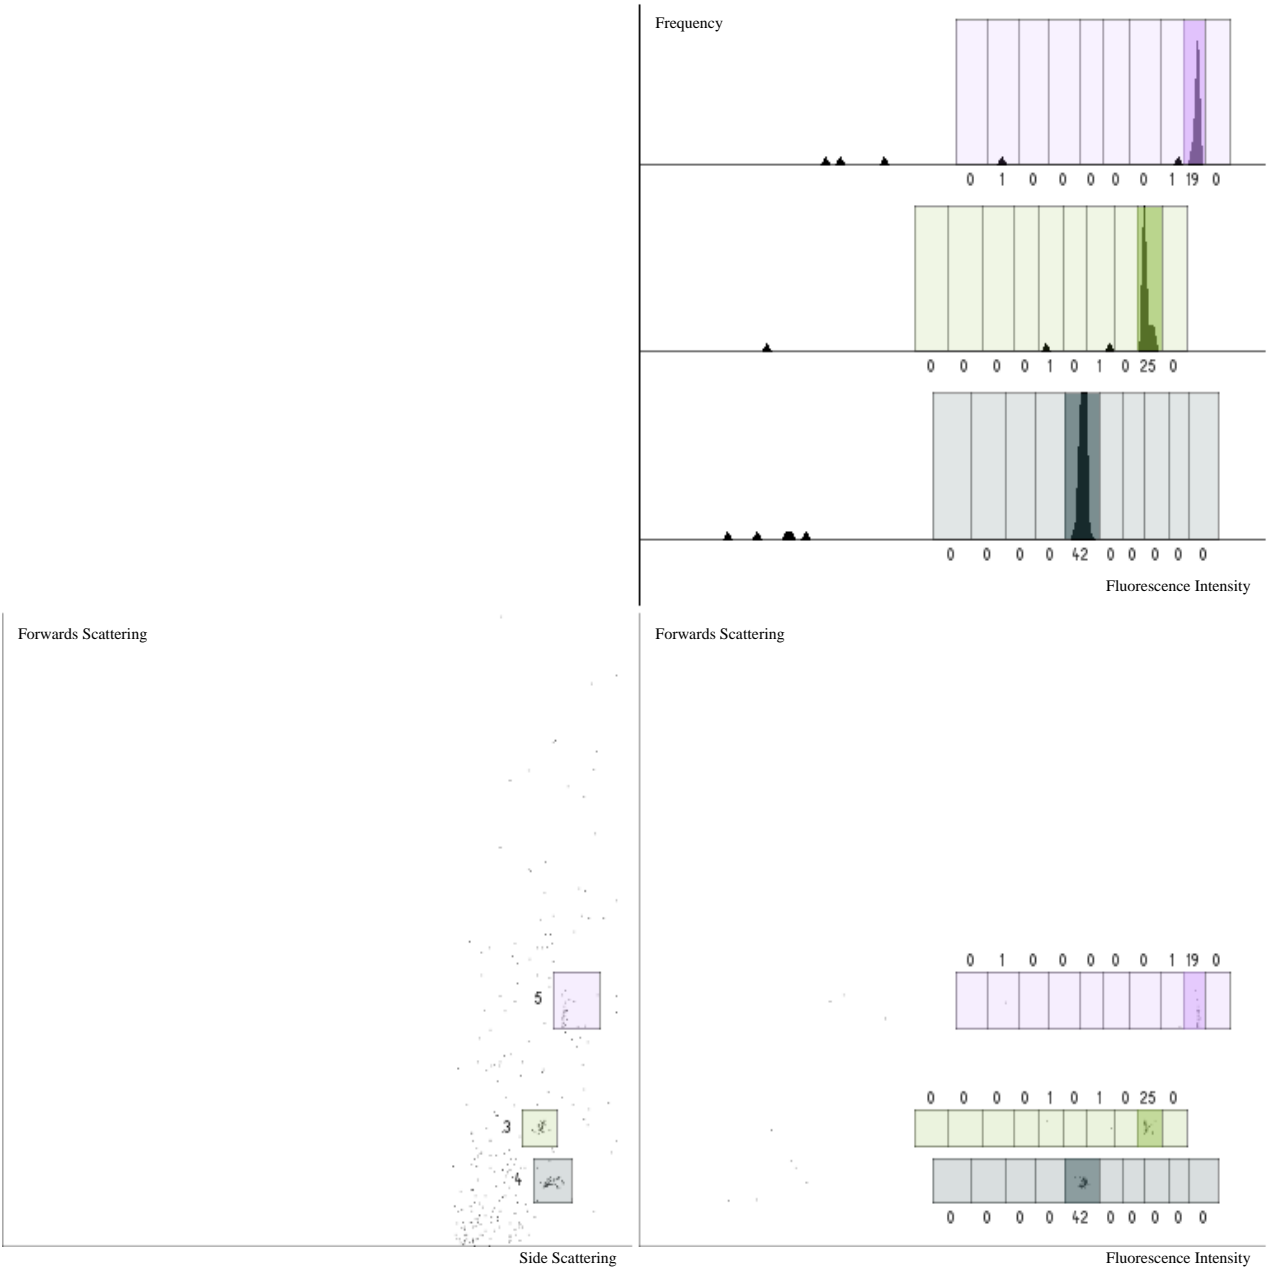



ANNEX 3: TAG DECONVOLUTION - BEAD 351

Passes flow sorting criteria: Yes  
Passes tag deconvolution criteria: Yes  
Included in protocol analysis: Yes  
Protocol: 9, 1, 6, 5  
Filename: Bin5\_plateA0\_D10.fcs  
Split 1: Petrol shading  
Split 2: Green shading  
Split 3: Violet shading

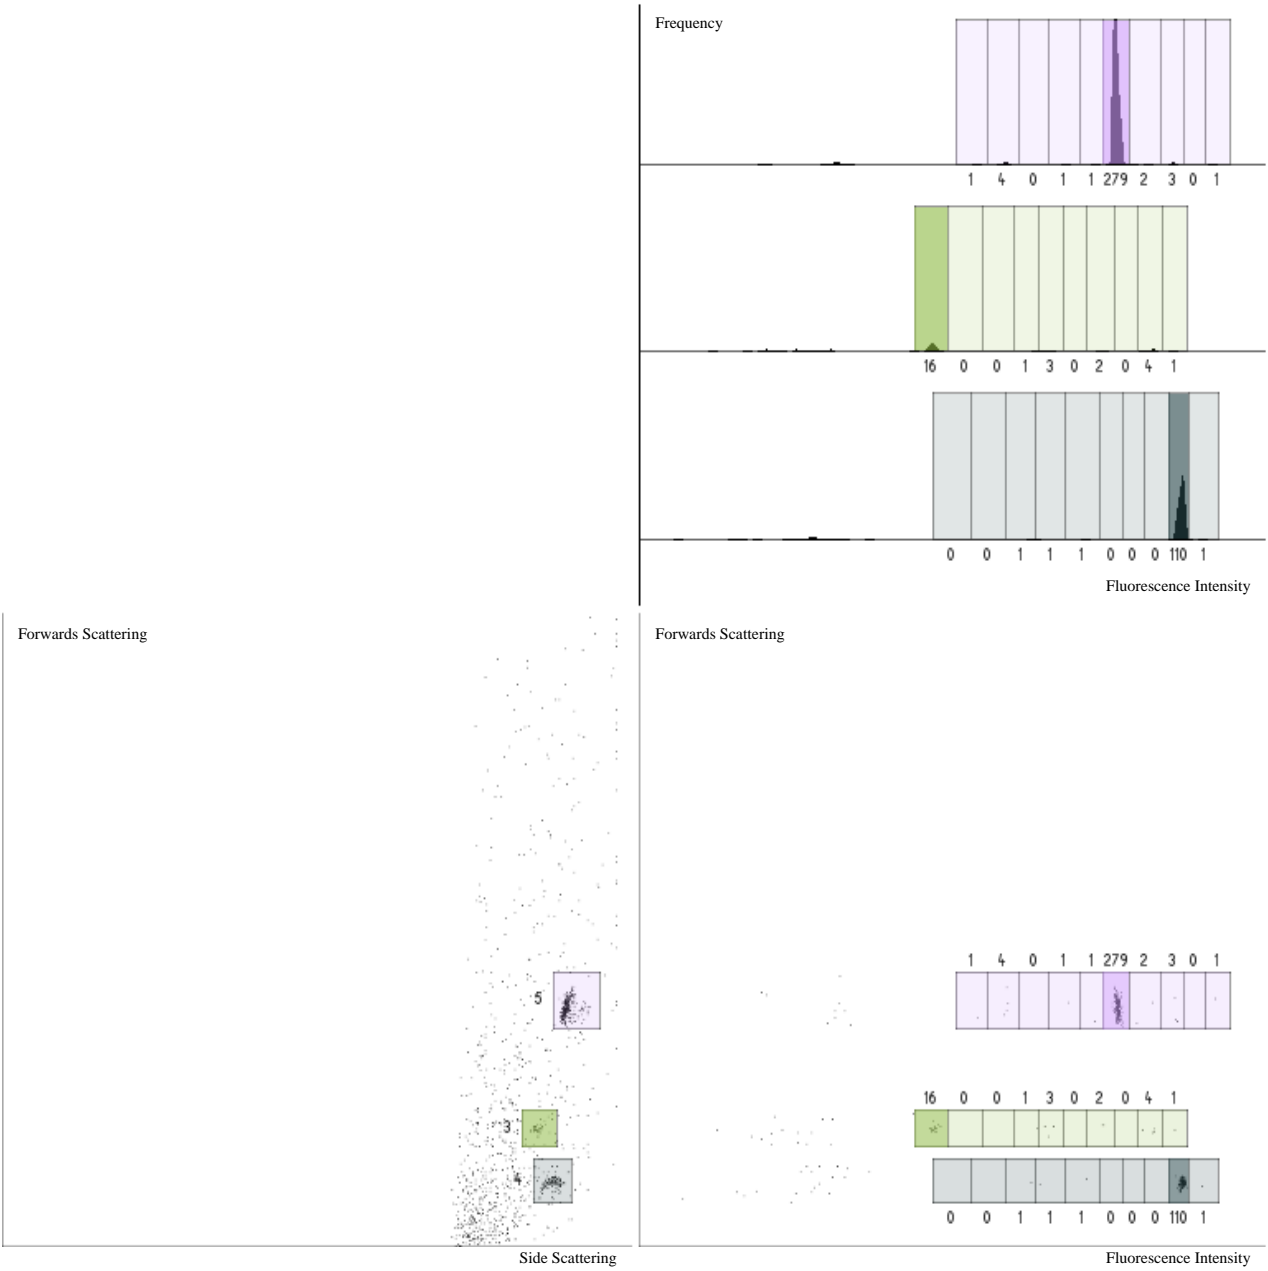

ANNEX 3: TAG DECONVOLUTION - BEAD 352

Passes flow sorting criteria: Yes  
Passes tag deconvolution criteria: No  
Included in protocol analysis: No  
Protocol: N/A  
Filename: Bin5\_plateA0\_D11.fcs  
Split 1: Petrol shading  
Split 2: Green shading  
Split 3: Violet shading

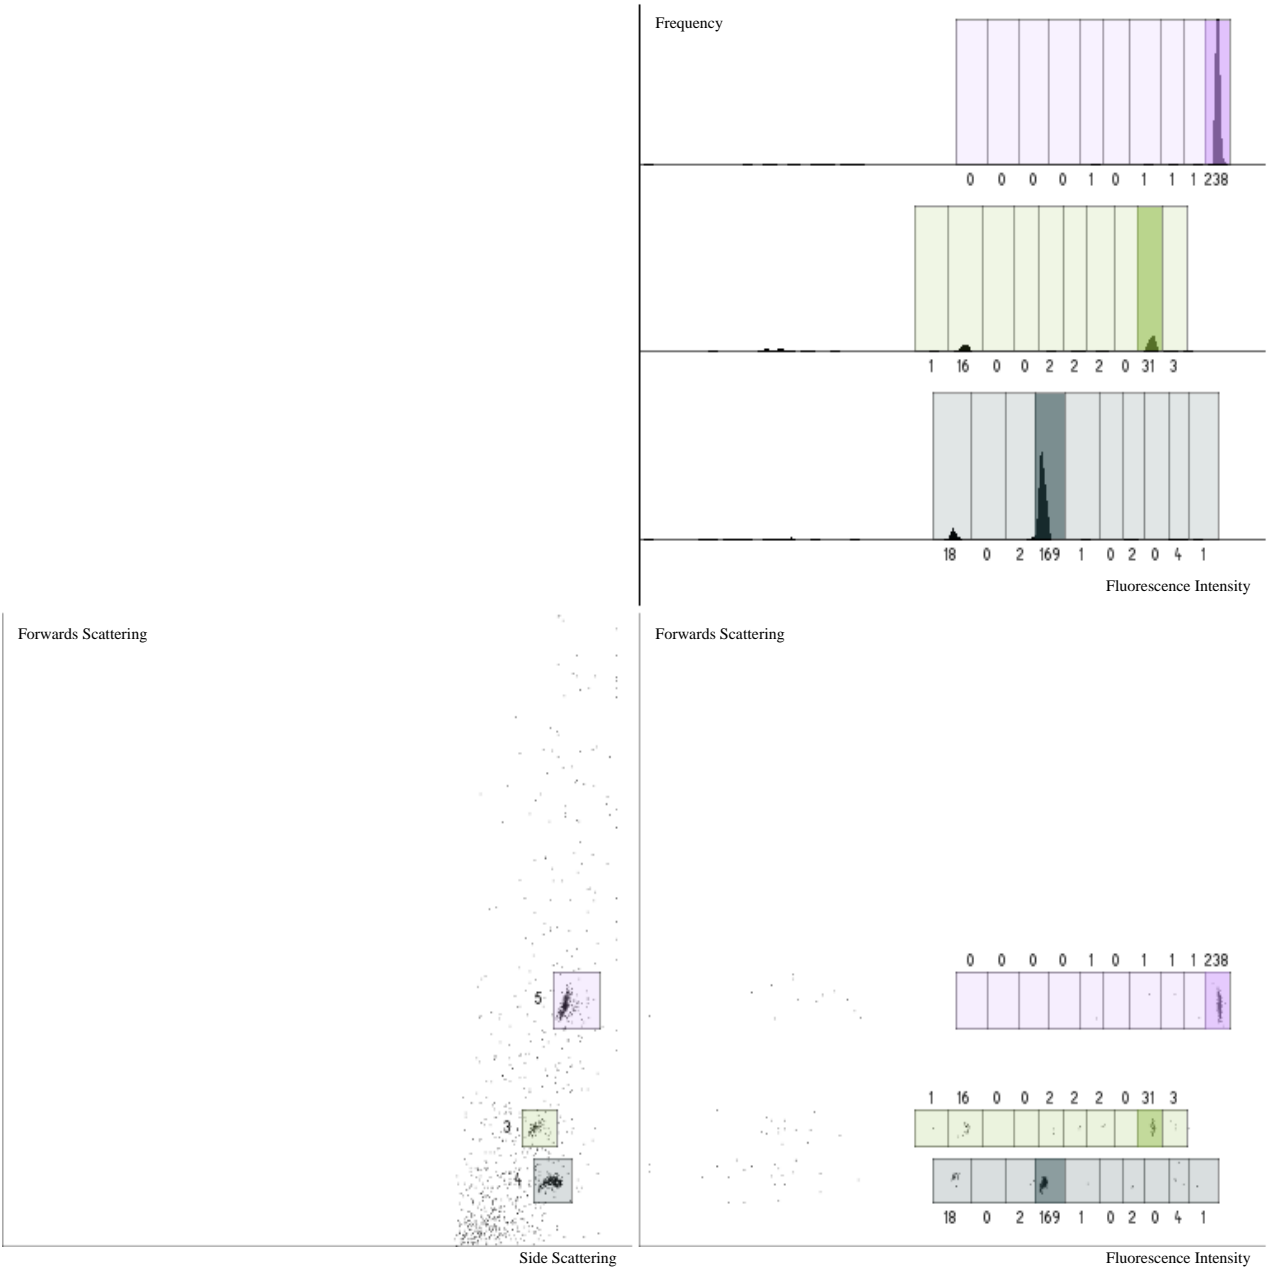

ANNEX 3: TAG DECONVOLUTION - BEAD 353

Passes flow sorting criteria: Yes  
Passes tag deconvolution criteria: Yes  
Included in protocol analysis: Yes  
Protocol: 3, 2, 5, 5  
Filename: Bin5\_plateA0\_D12.fcs  
Split 1: Petrol shading  
Split 2: Green shading  
Split 3: Violet shading

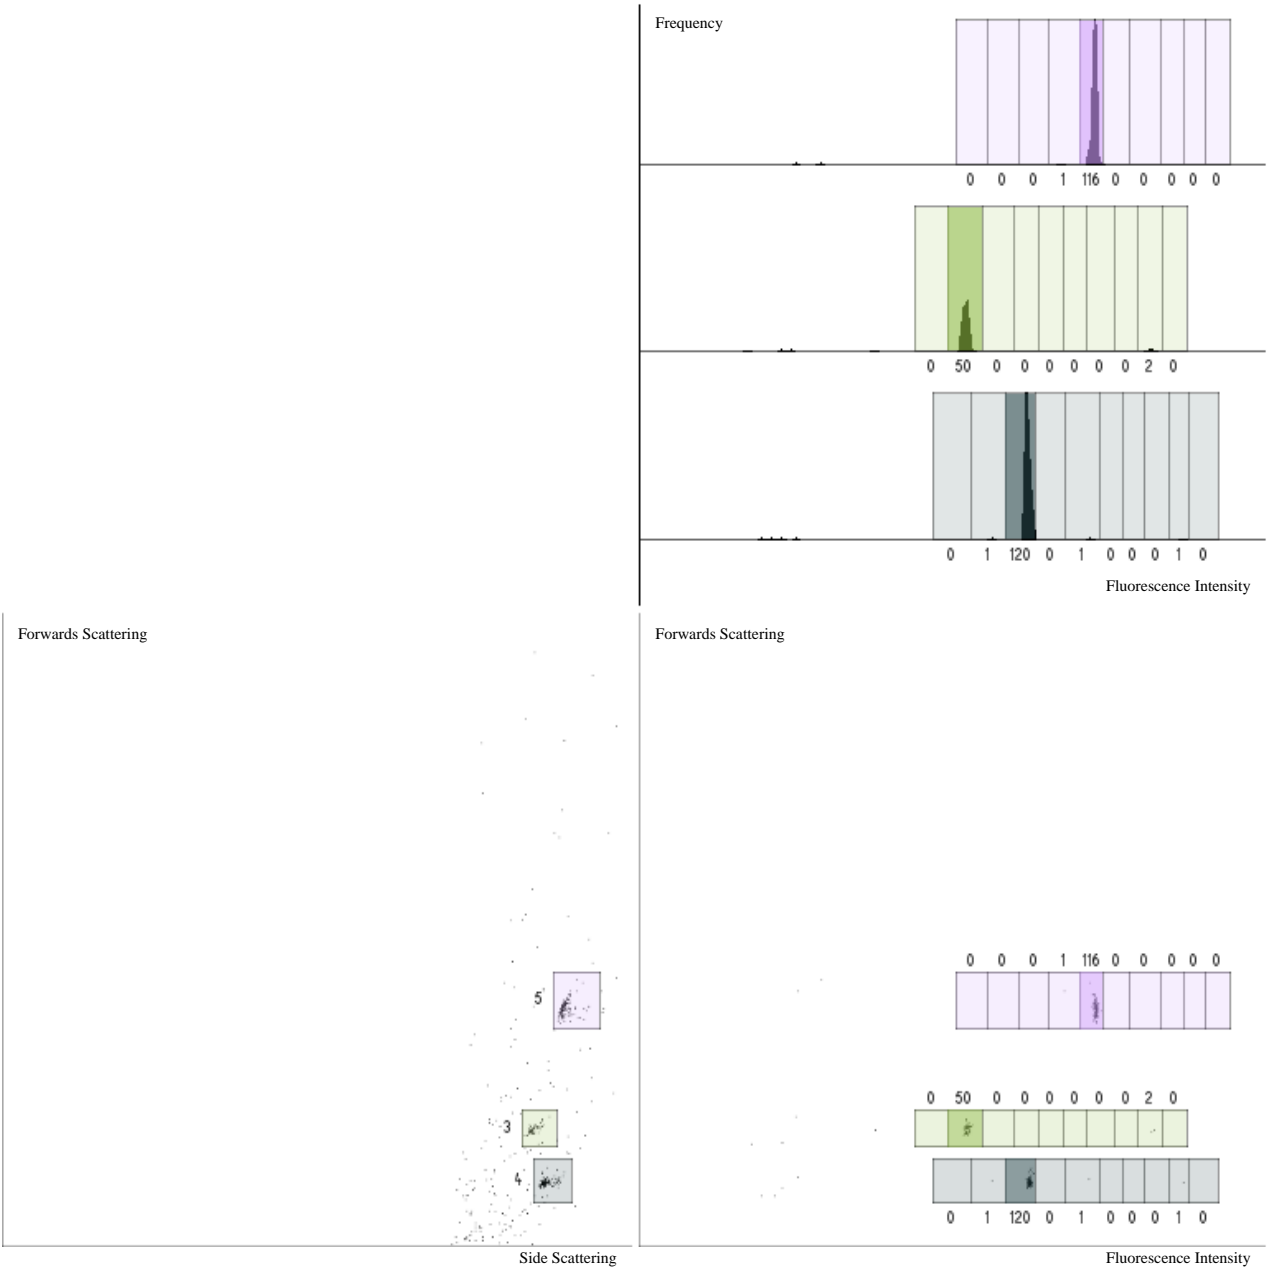

ANNEX 3: TAG DECONVOLUTION - BEAD 354

Passes flow sorting criteria: Yes  
Passes tag deconvolution criteria: No  
Included in protocol analysis: No  
Protocol: N/A  
Filename: Bin5\_plateA0\_E1.fcs  
Split 1: Petrol shading  
Split 2: Green shading  
Split 3: Violet shading

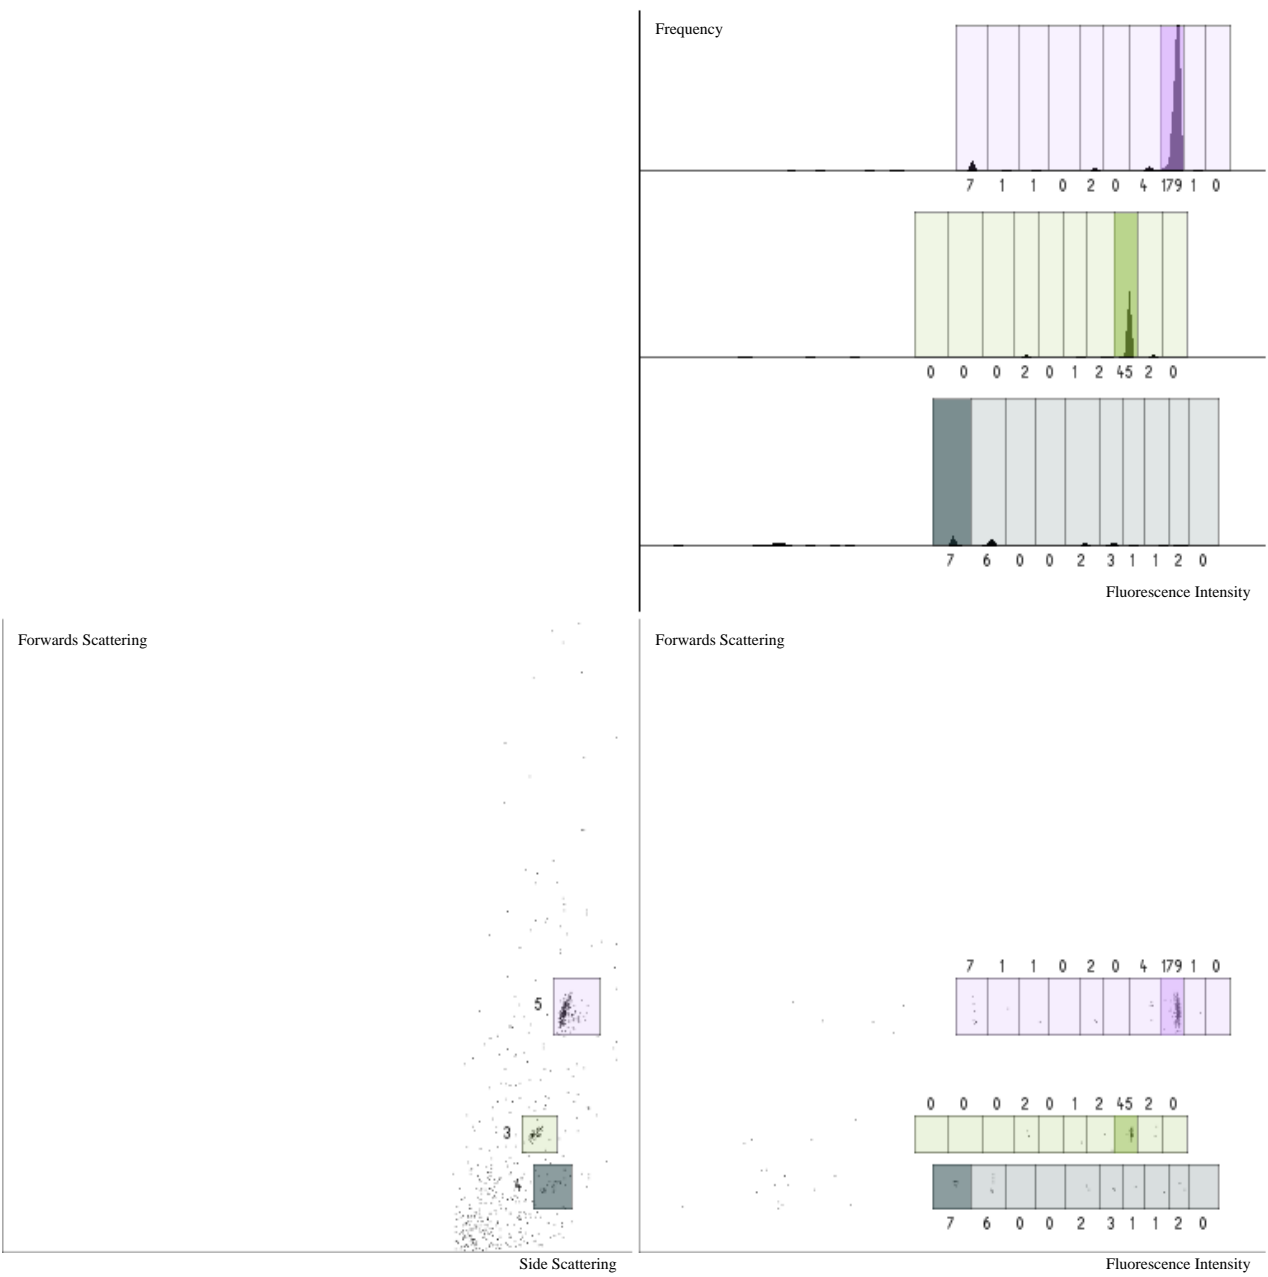

ANNEX 3: TAG DECONVOLUTION - BEAD 355

Passes flow sorting criteria: Yes  
Passes tag deconvolution criteria: Yes  
Included in protocol analysis: Yes  
Protocol: 1, 5, 1, 5  
Filename: Bin5\_plateA0\_E2.fcs  
Split 1: Petrol shading  
Split 2: Green shading  
Split 3: Violet shading

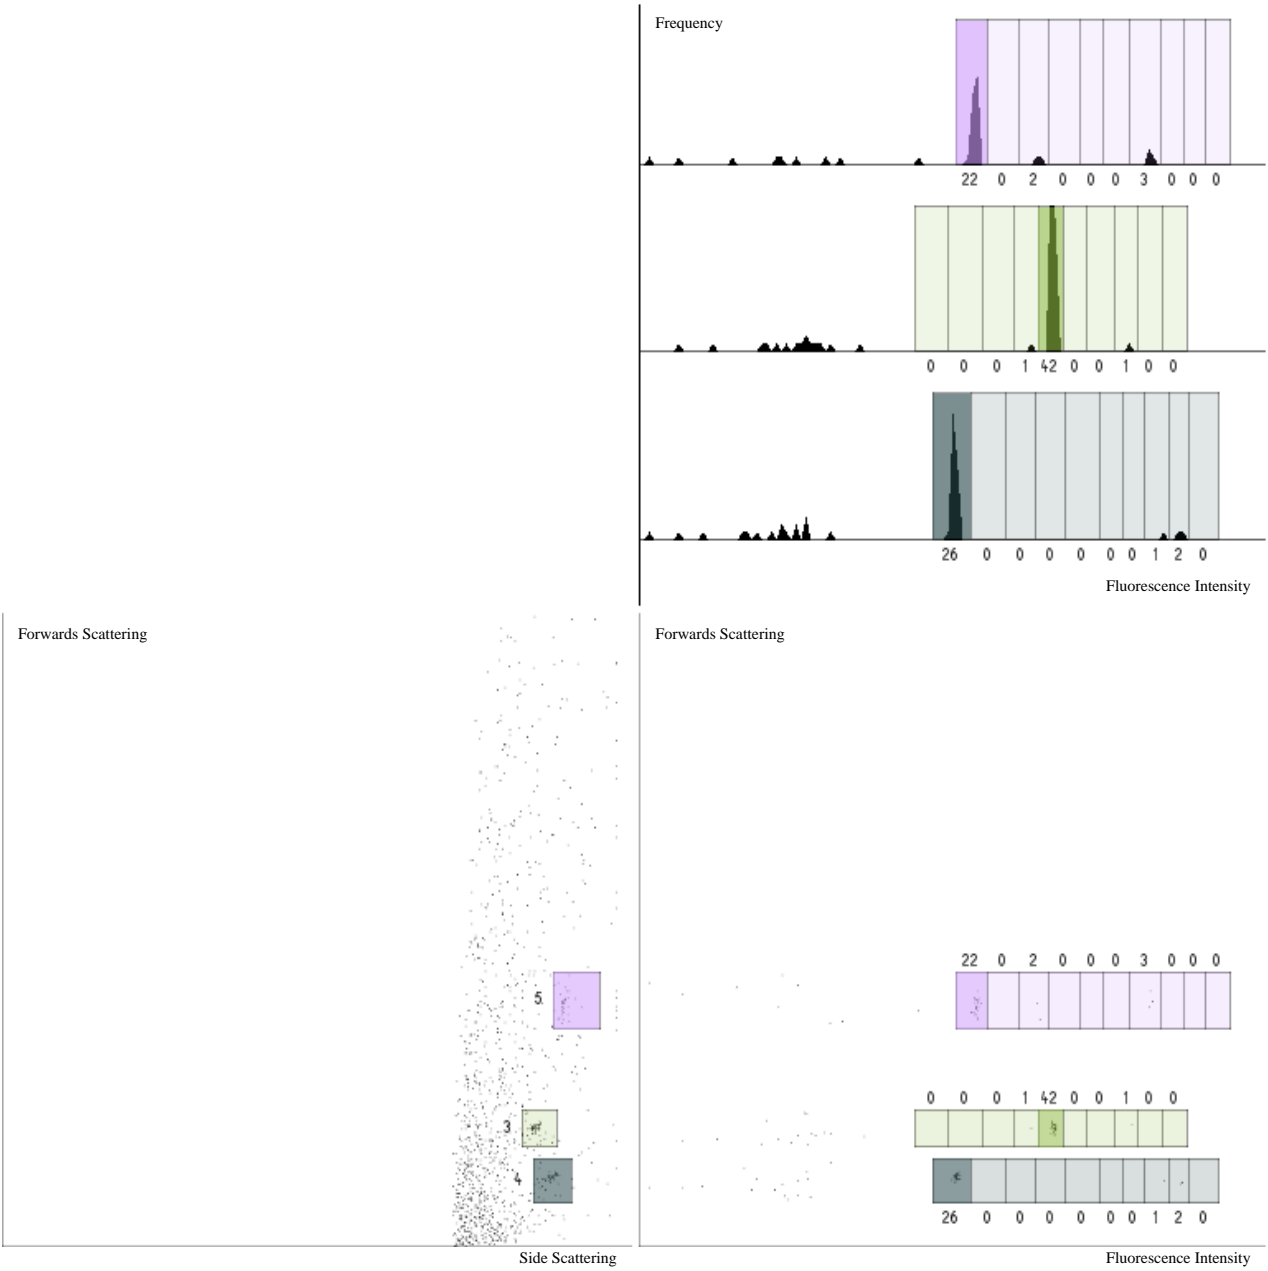

ANNEX 3: TAG DECONVOLUTION - BEAD 356

Passes flow sorting criteria: Yes  
Passes tag deconvolution criteria: Yes  
Included in protocol analysis: Yes  
Protocol: 7, 7, 5, 5  
Filename: Bin5\_plateA0\_E3.fcs  
Split 1: Petrol shading  
Split 2: Green shading  
Split 3: Violet shading

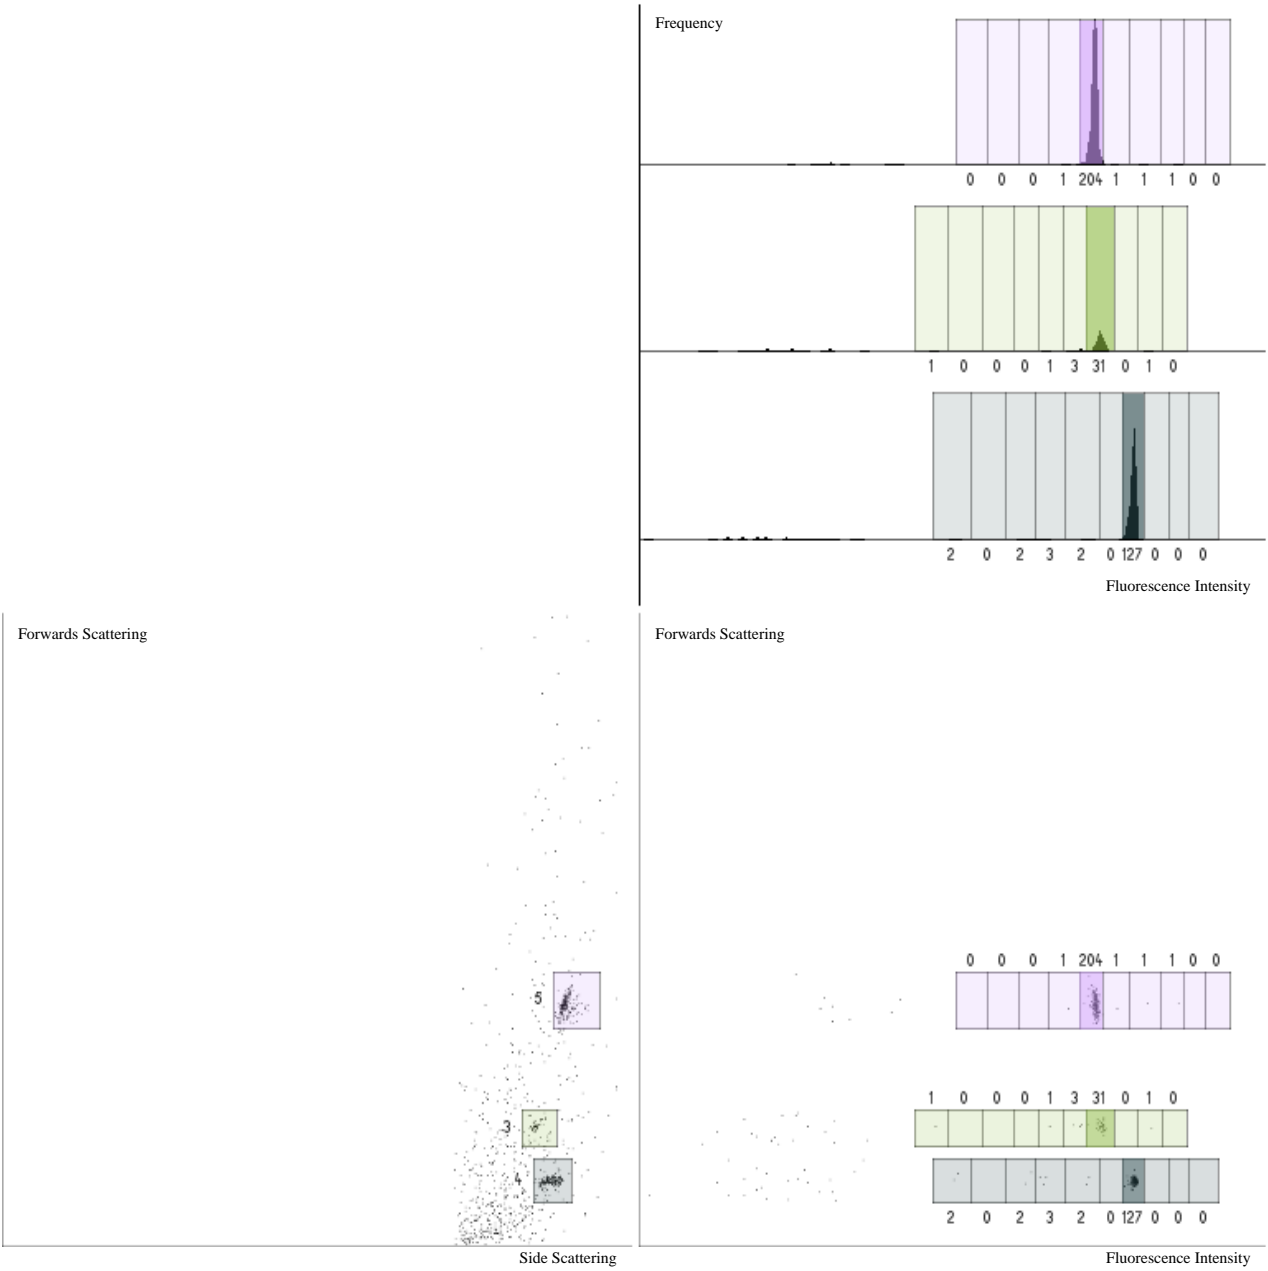

ANNEX 3: TAG DECONVOLUTION - BEAD 357

Passes flow sorting criteria: Yes  
Passes tag deconvolution criteria: Yes  
Included in protocol analysis: Yes  
Protocol: 8, 7, 3, 5  
Filename: Bin5\_plateA0\_E4.fcs  
Split 1: Petrol shading  
Split 2: Green shading  
Split 3: Violet shading

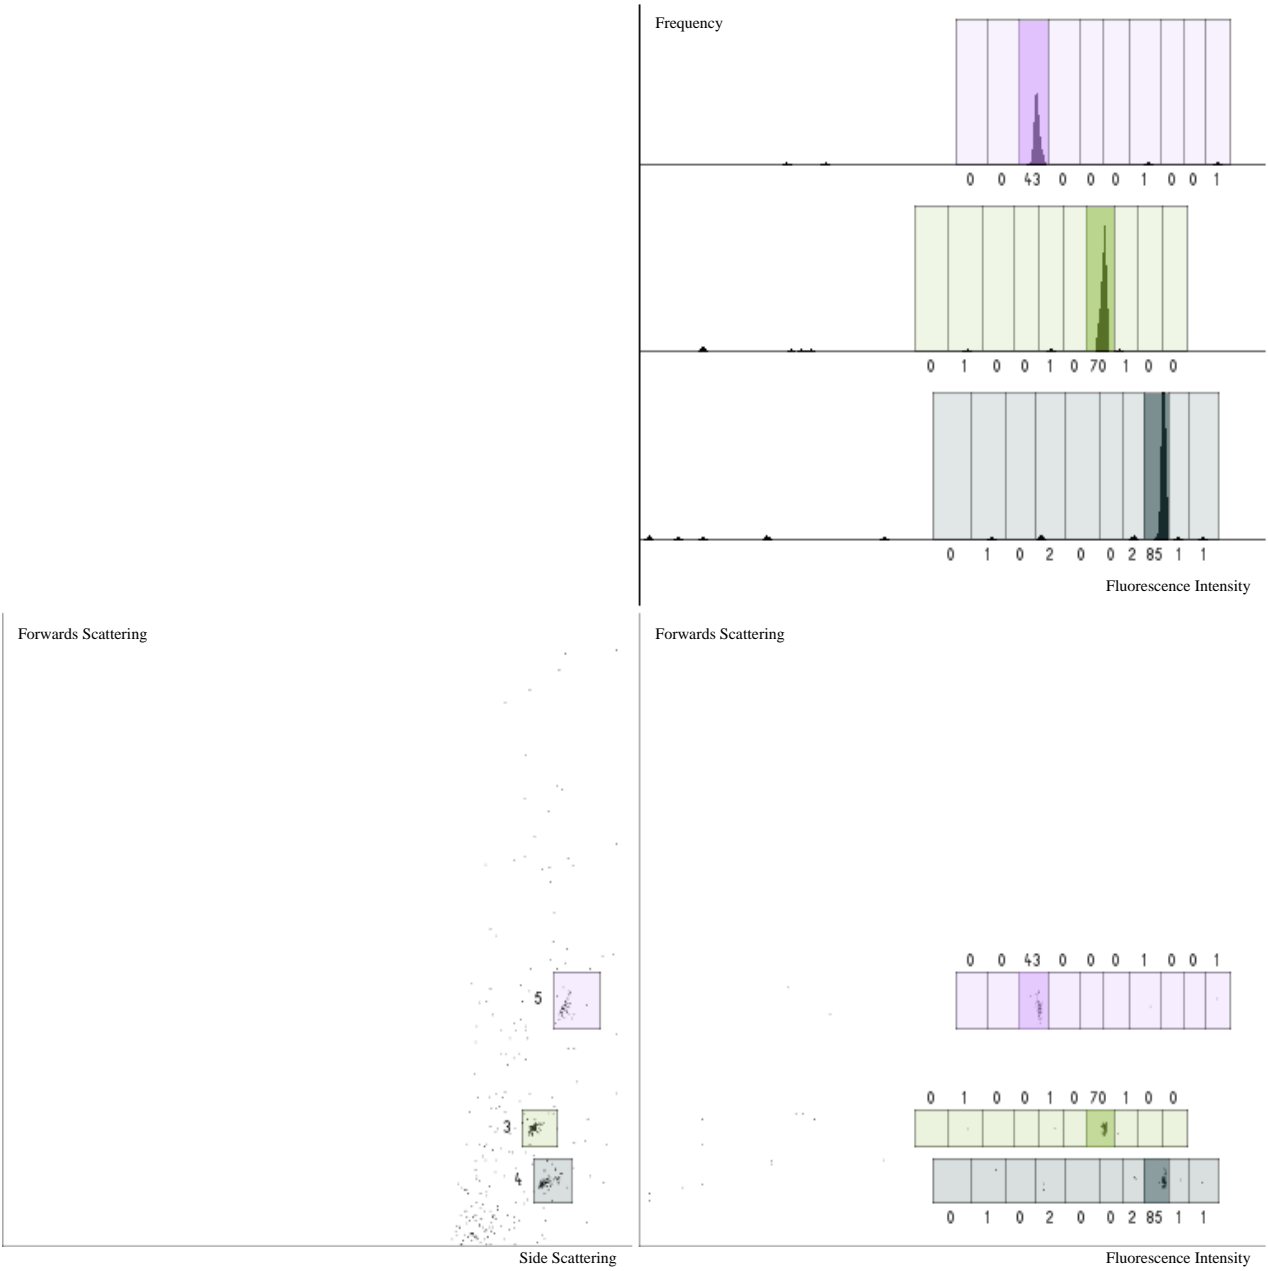

ANNEX 3: TAG DECONVOLUTION - BEAD 358

Passes flow sorting criteria: Yes  
Passes tag deconvolution criteria: Yes  
Included in protocol analysis: Yes  
Protocol: 10, 5, 5, 5  
Filename: Bin5\_plateA0\_E5.fcs  
Split 1: Petrol shading  
Split 2: Green shading  
Split 3: Violet shading

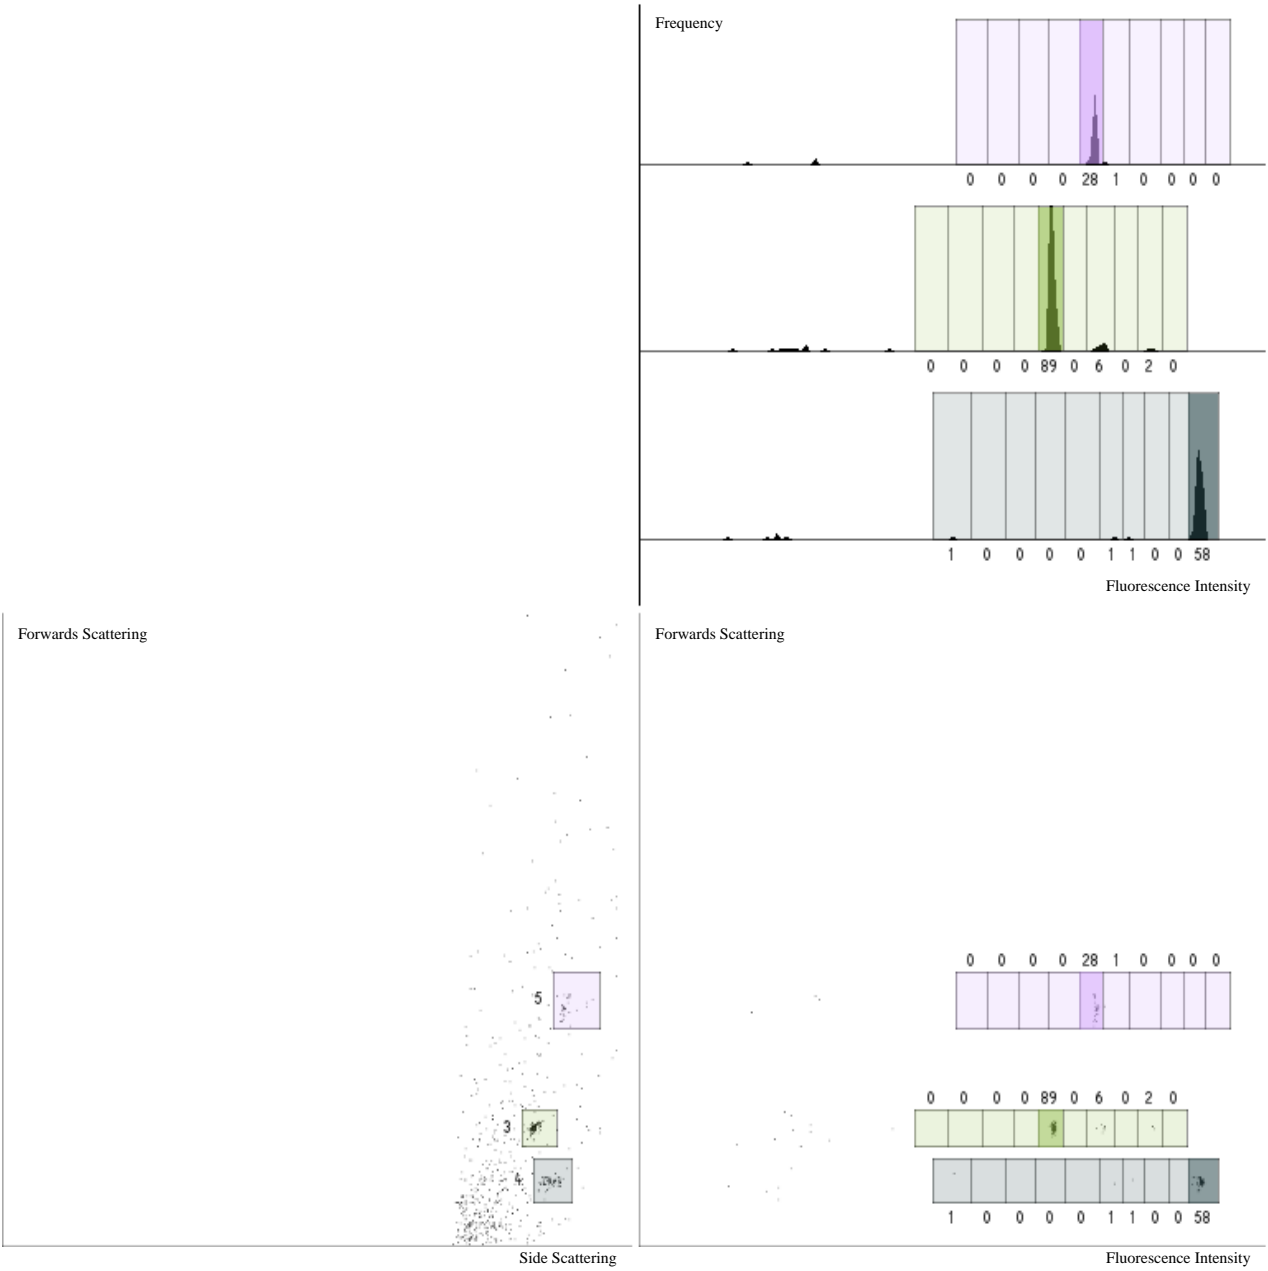



ANNEX 3: TAG DECONVOLUTION - BEAD 359

Passes flow sorting criteria: Yes  
Passes tag deconvolution criteria: No  
Included in protocol analysis: No  
Protocol: N/A  
Filename: Bin5\_plateA0\_E6.fcs  
Split 1: Petrol shading  
Split 2: Green shading  
Split 3: Violet shading

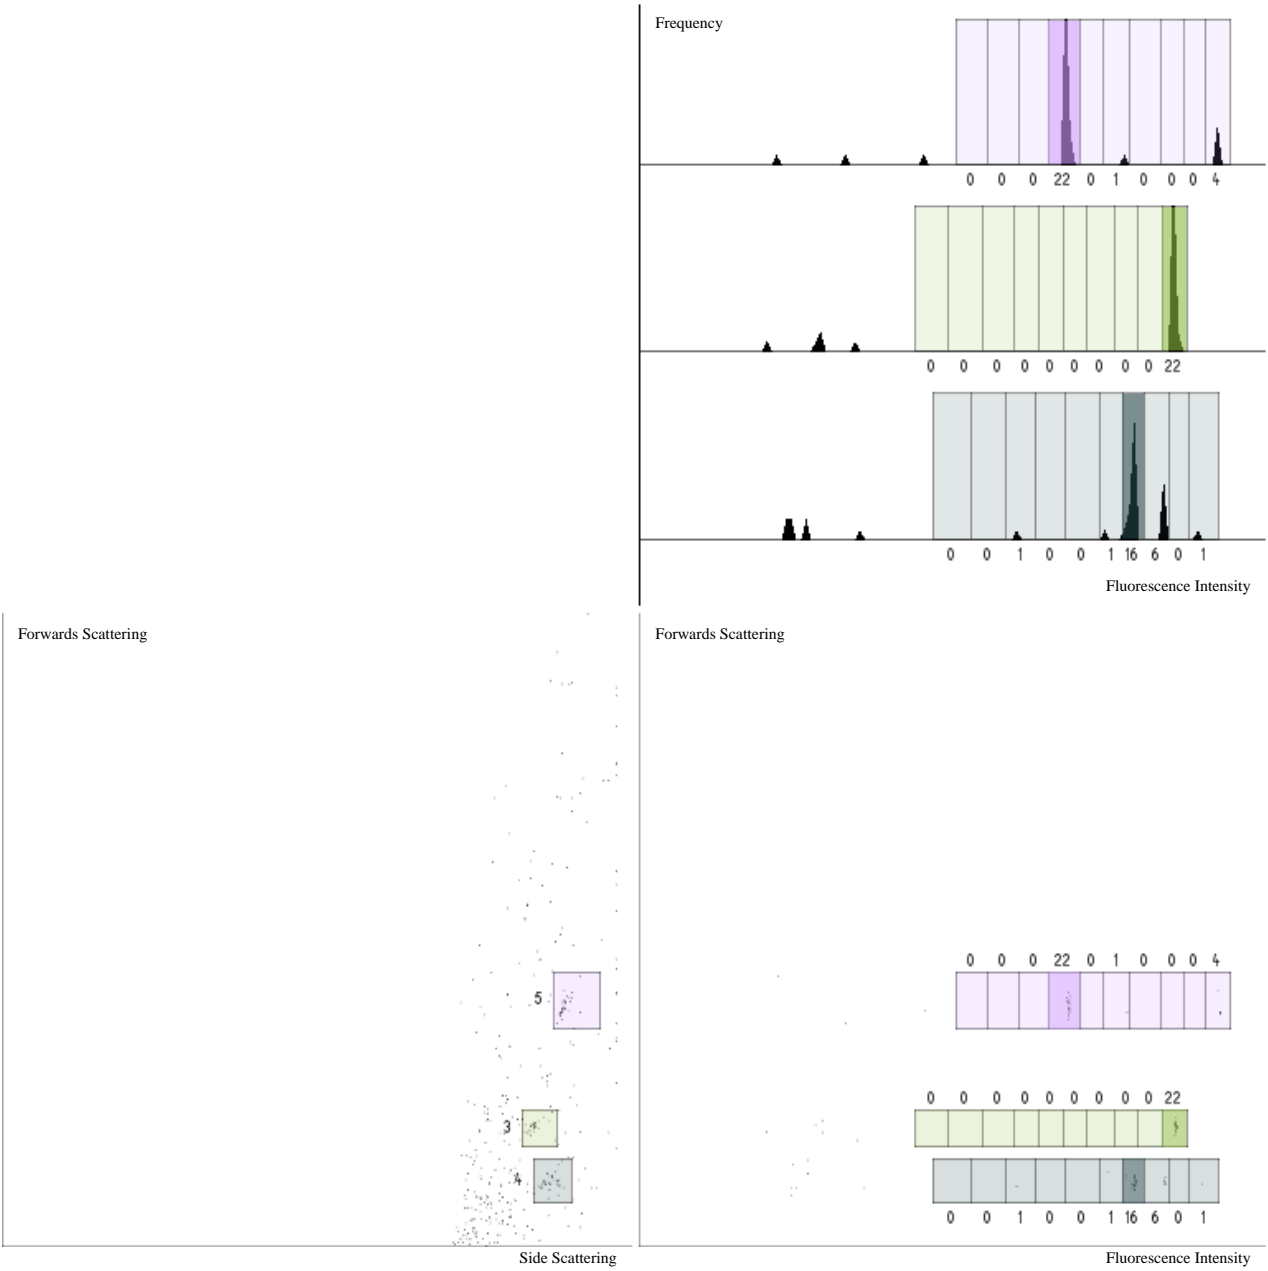

ANNEX 3: TAG DECONVOLUTION - BEAD 360

Passes flow sorting criteria: Yes  
Passes tag deconvolution criteria: No  
Included in protocol analysis: No  
Protocol: N/A  
Filename: Bin5\_plateA0\_E7.fcs  
Split 1: Petrol shading  
Split 2: Green shading  
Split 3: Violet shading

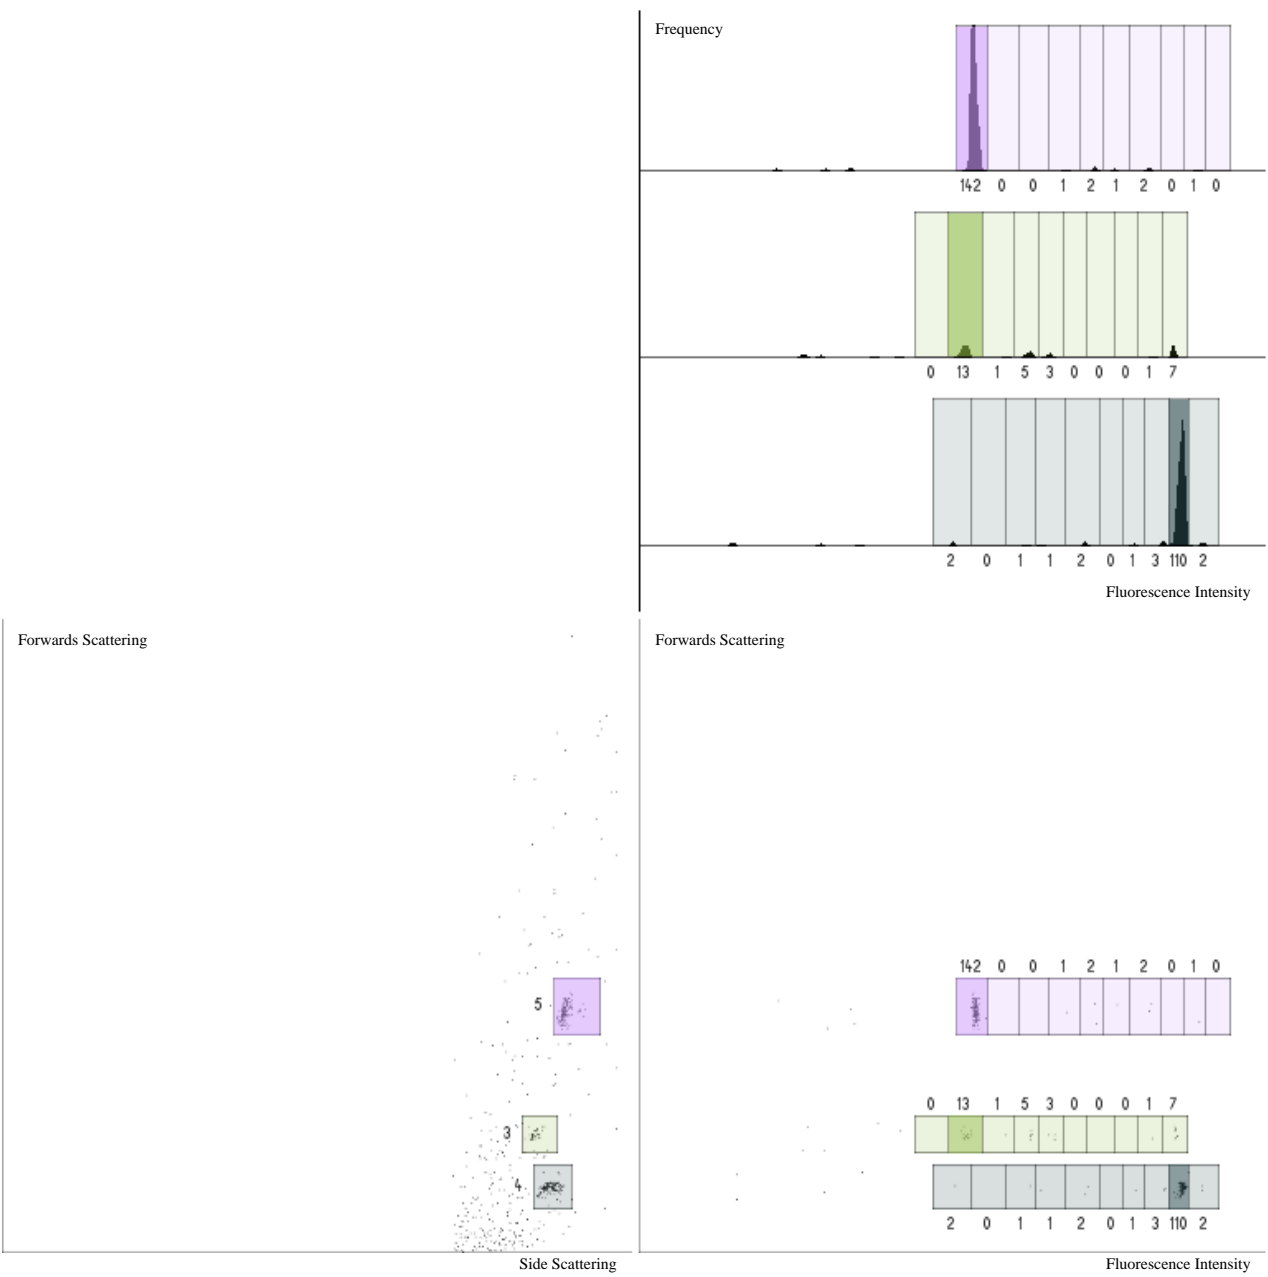

ANNEX 3: TAG DECONVOLUTION - BEAD 361

Passes flow sorting criteria: Yes  
Passes tag deconvolution criteria: Yes  
Included in protocol analysis: Yes  
Protocol: 10, 2, 5, 5  
Filename: Bin5\_plateA0\_E9.fcs  
Split 1: Petrol shading  
Split 2: Green shading  
Split 3: Violet shading

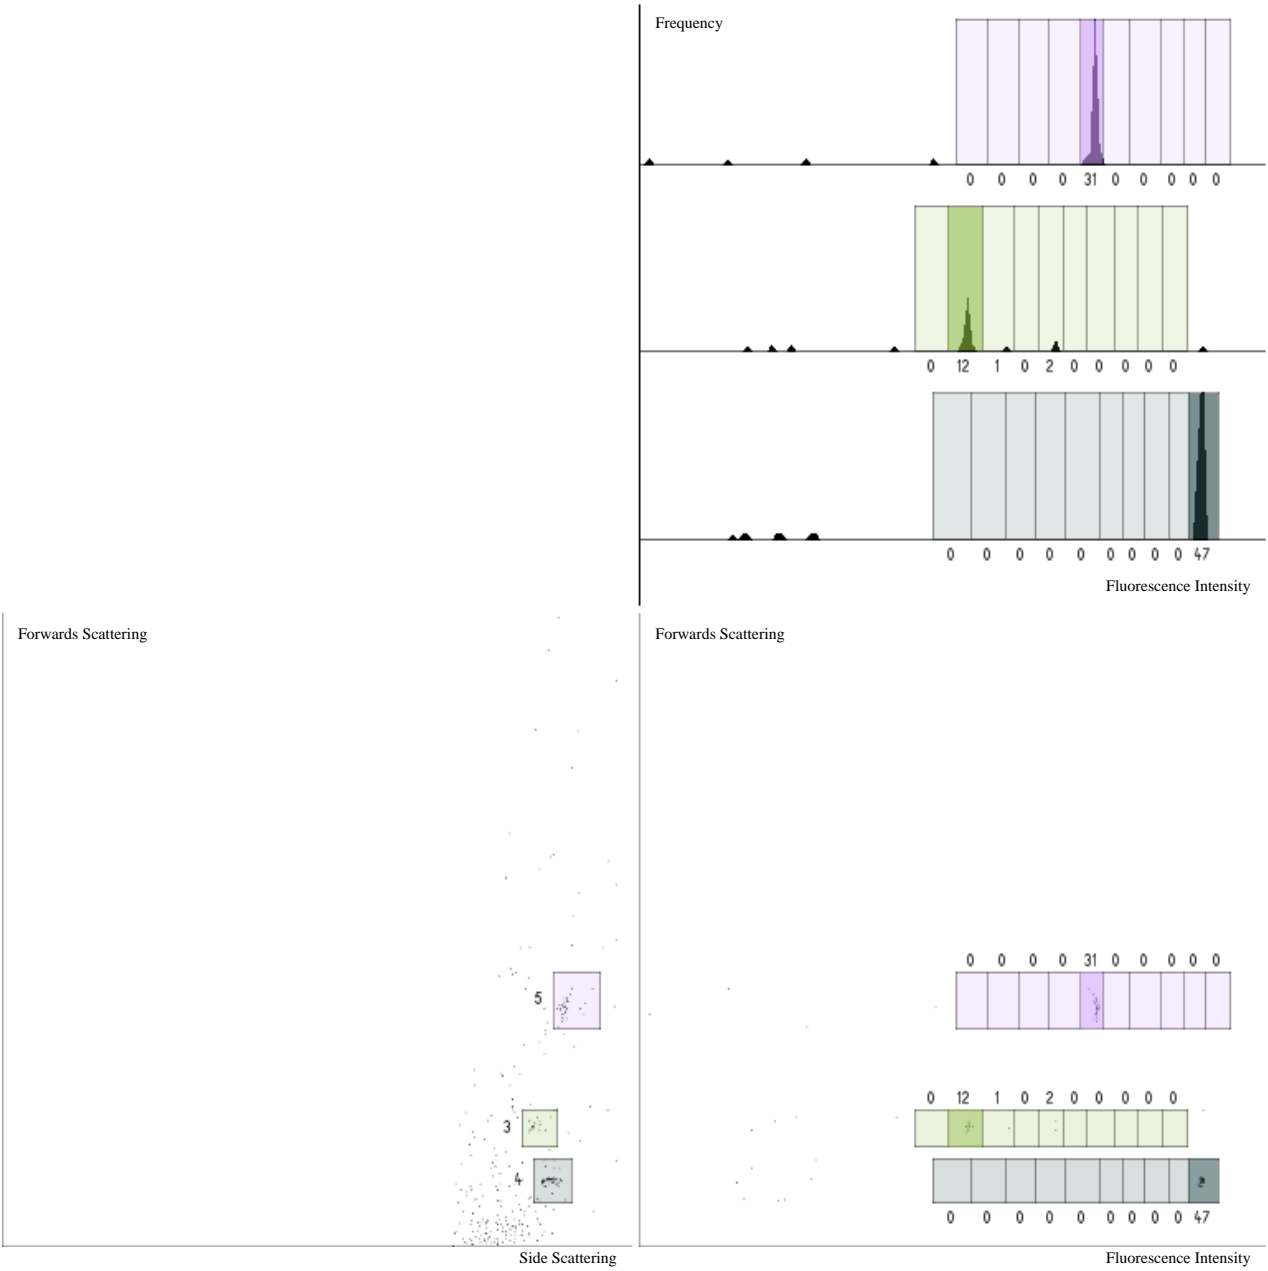

ANNEX 3: TAG DECONVOLUTION - BEAD 362

Passes flow sorting criteria: Yes  
Passes tag deconvolution criteria: No  
Included in protocol analysis: No  
Protocol: N/A  
Filename: Bin5\_plateA0\_E10.fcs  
Split 1: Petrol shading  
Split 2: Green shading  
Split 3: Violet shading

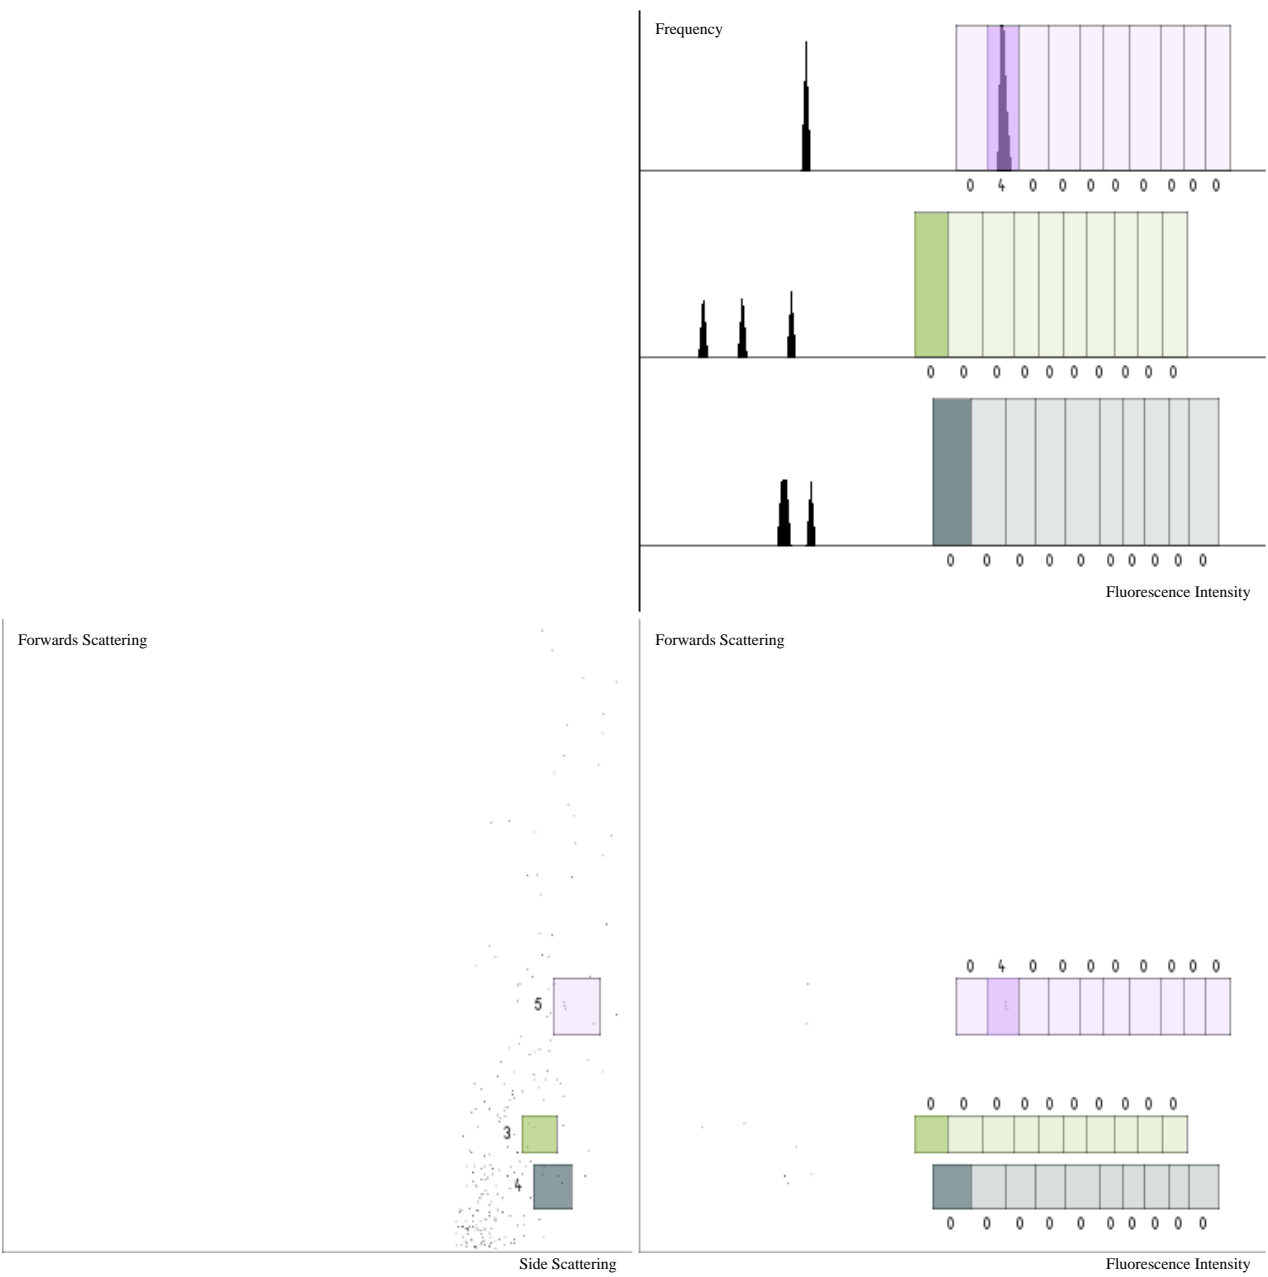

ANNEX 3: TAG DECONVOLUTION - BEAD 363

Passes flow sorting criteria: Yes  
Passes tag deconvolution criteria: Yes  
Included in protocol analysis: Yes  
Protocol: 9, 5, 1, 5  
Filename: Bin5\_plateA0\_E11.fcs  
Split 1: Petrol shading  
Split 2: Green shading  
Split 3: Violet shading

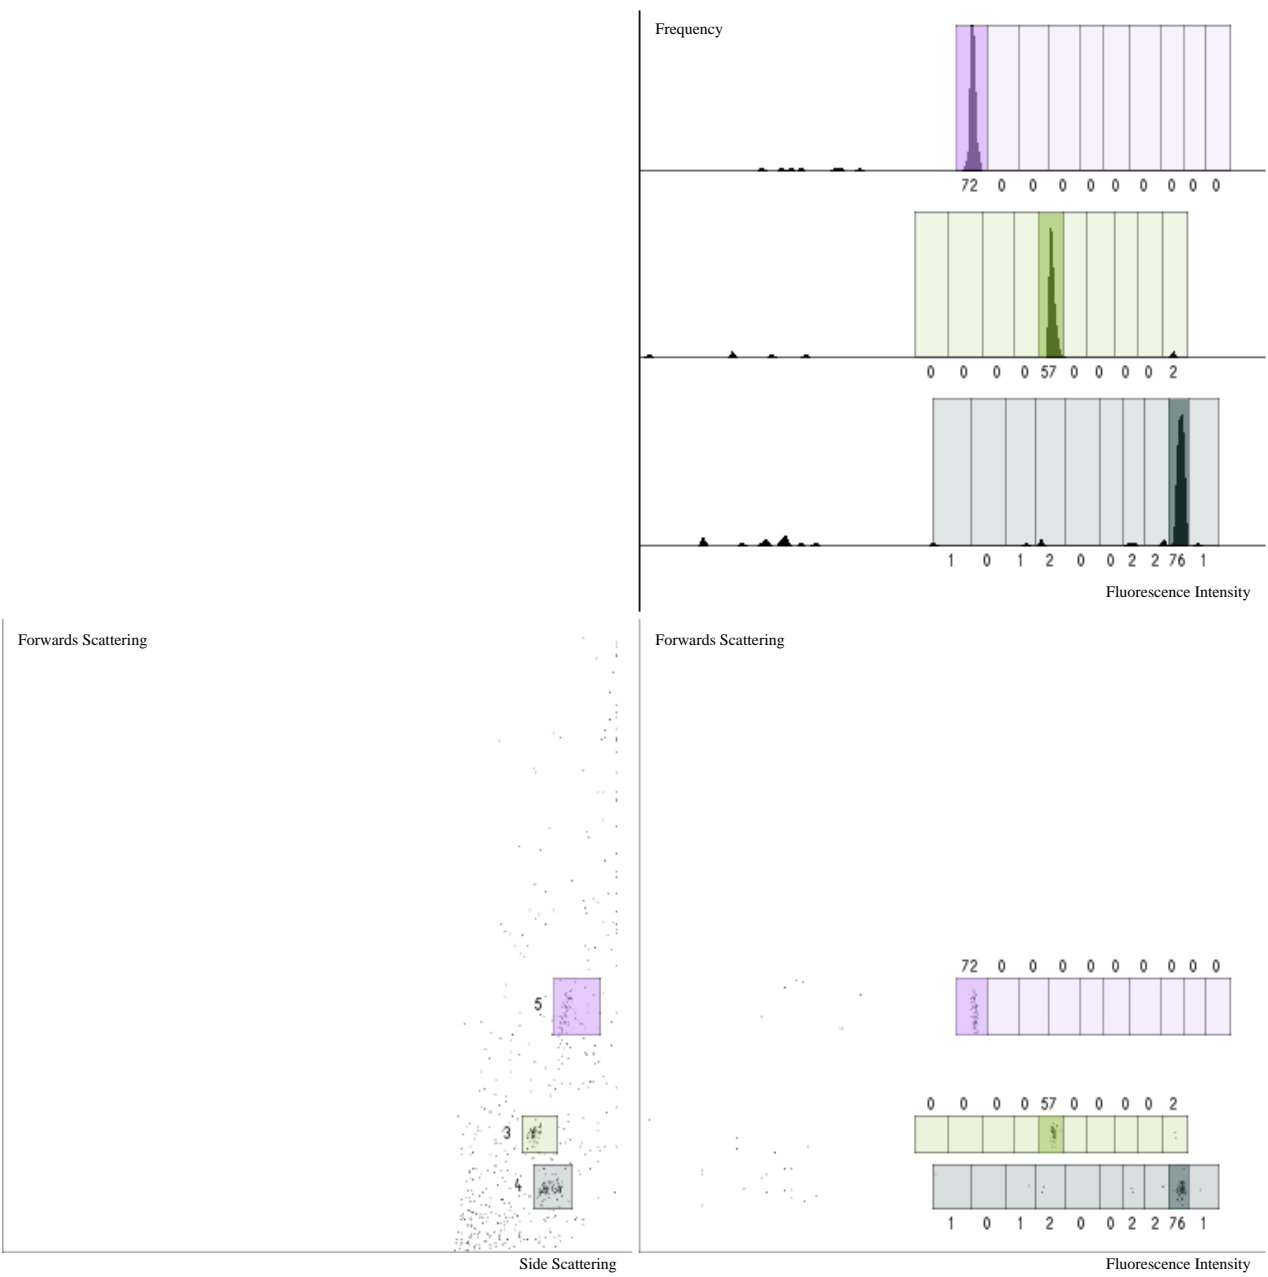

ANNEX 3: TAG DECONVOLUTION - BEAD 364

Passes flow sorting criteria: Yes  
Passes tag deconvolution criteria: Yes  
Included in protocol analysis: Yes  
Protocol: 2, 4, 2, 5  
Filename: Bin5\_plateA0\_E12.fcs  
Split 1: Petrol shading  
Split 2: Green shading  
Split 3: Violet shading

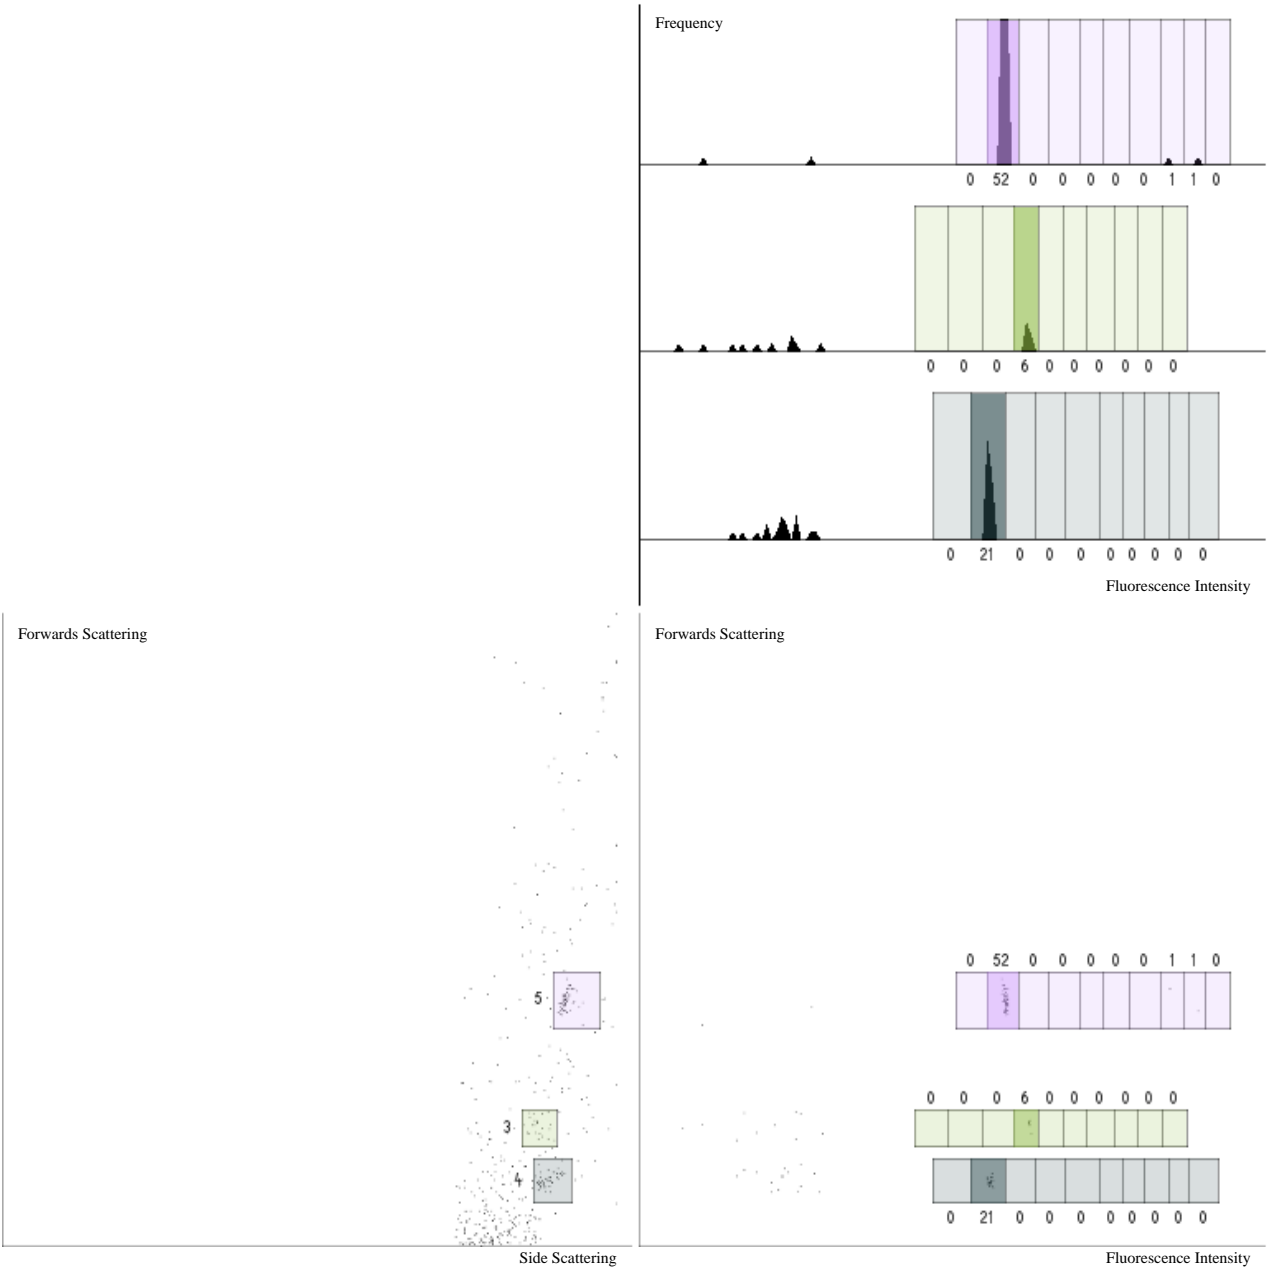

ANNEX 3: TAG DECONVOLUTION - BEAD 365

Passes flow sorting criteria: Yes  
Passes tag deconvolution criteria: Yes  
Included in protocol analysis: Yes  
Protocol: 1, 9, 1, 5  
Filename: Bin5\_plateA0\_F1.fcs  
Split 1: Petrol shading  
Split 2: Green shading  
Split 3: Violet shading

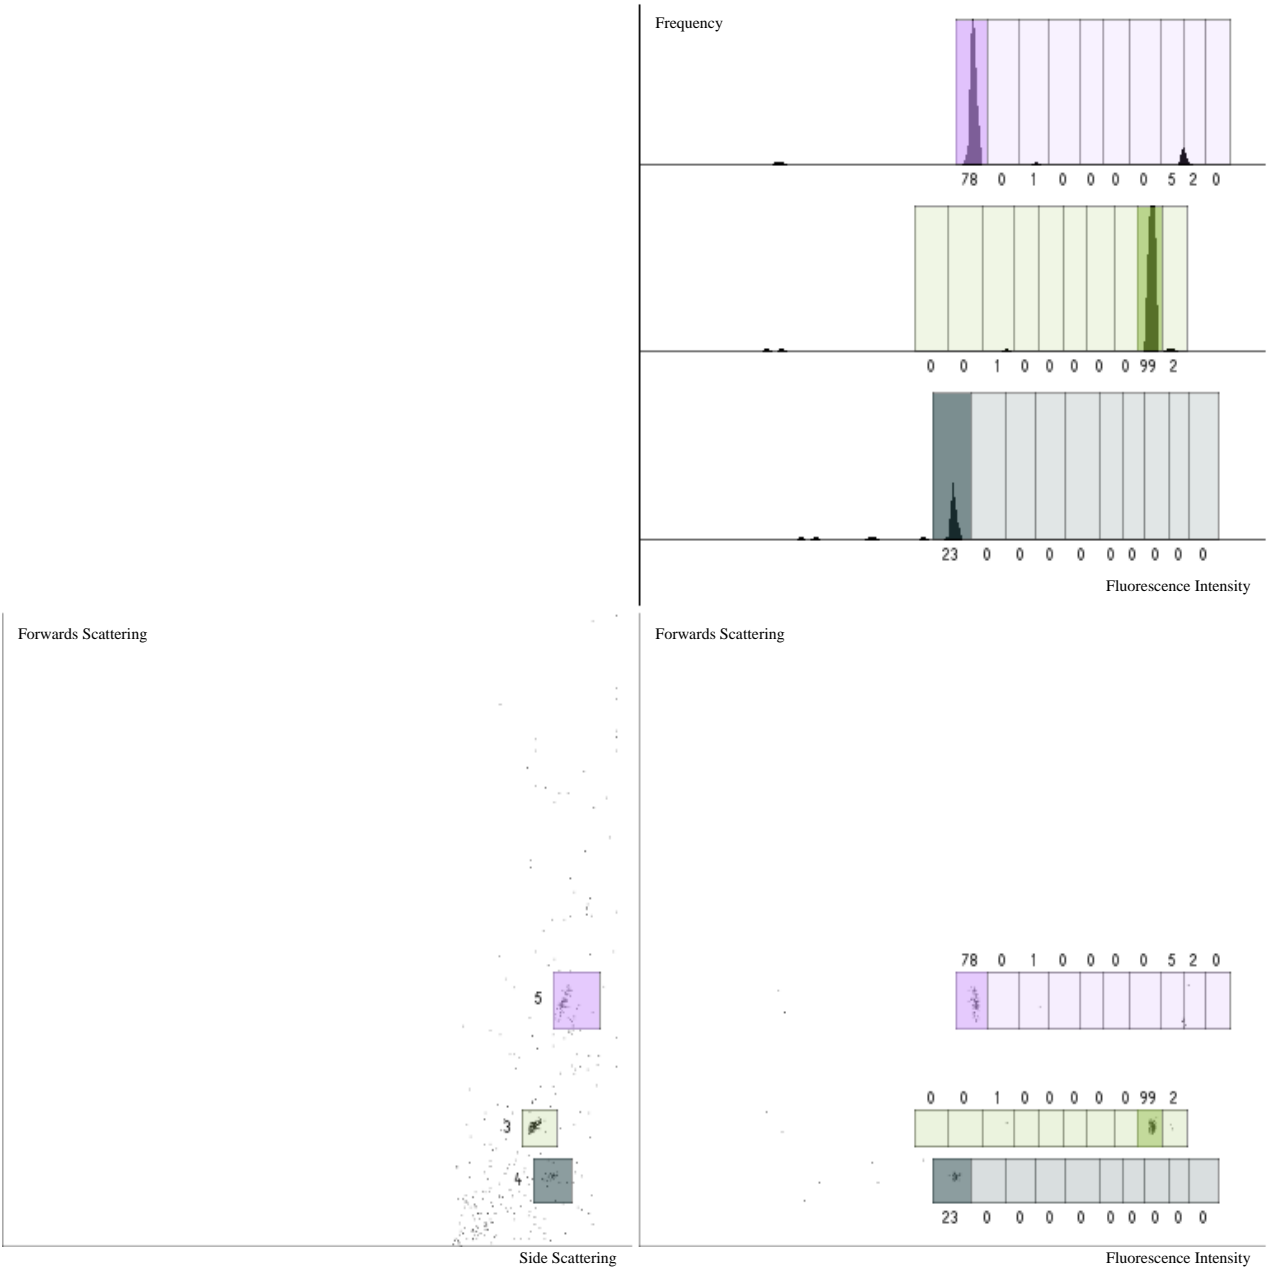

ANNEX 3: TAG DECONVOLUTION - BEAD 366

Passes flow sorting criteria: Yes

Passes tag deconvolution criteria: Yes

Included in protocol analysis: Yes

Protocol: 5, 9, 9, 5

Filename: Bin5\_plateA0\_F2.fcs

Split 1: Petrol shading

Split 2: Green shading

Split 3: Violet shading

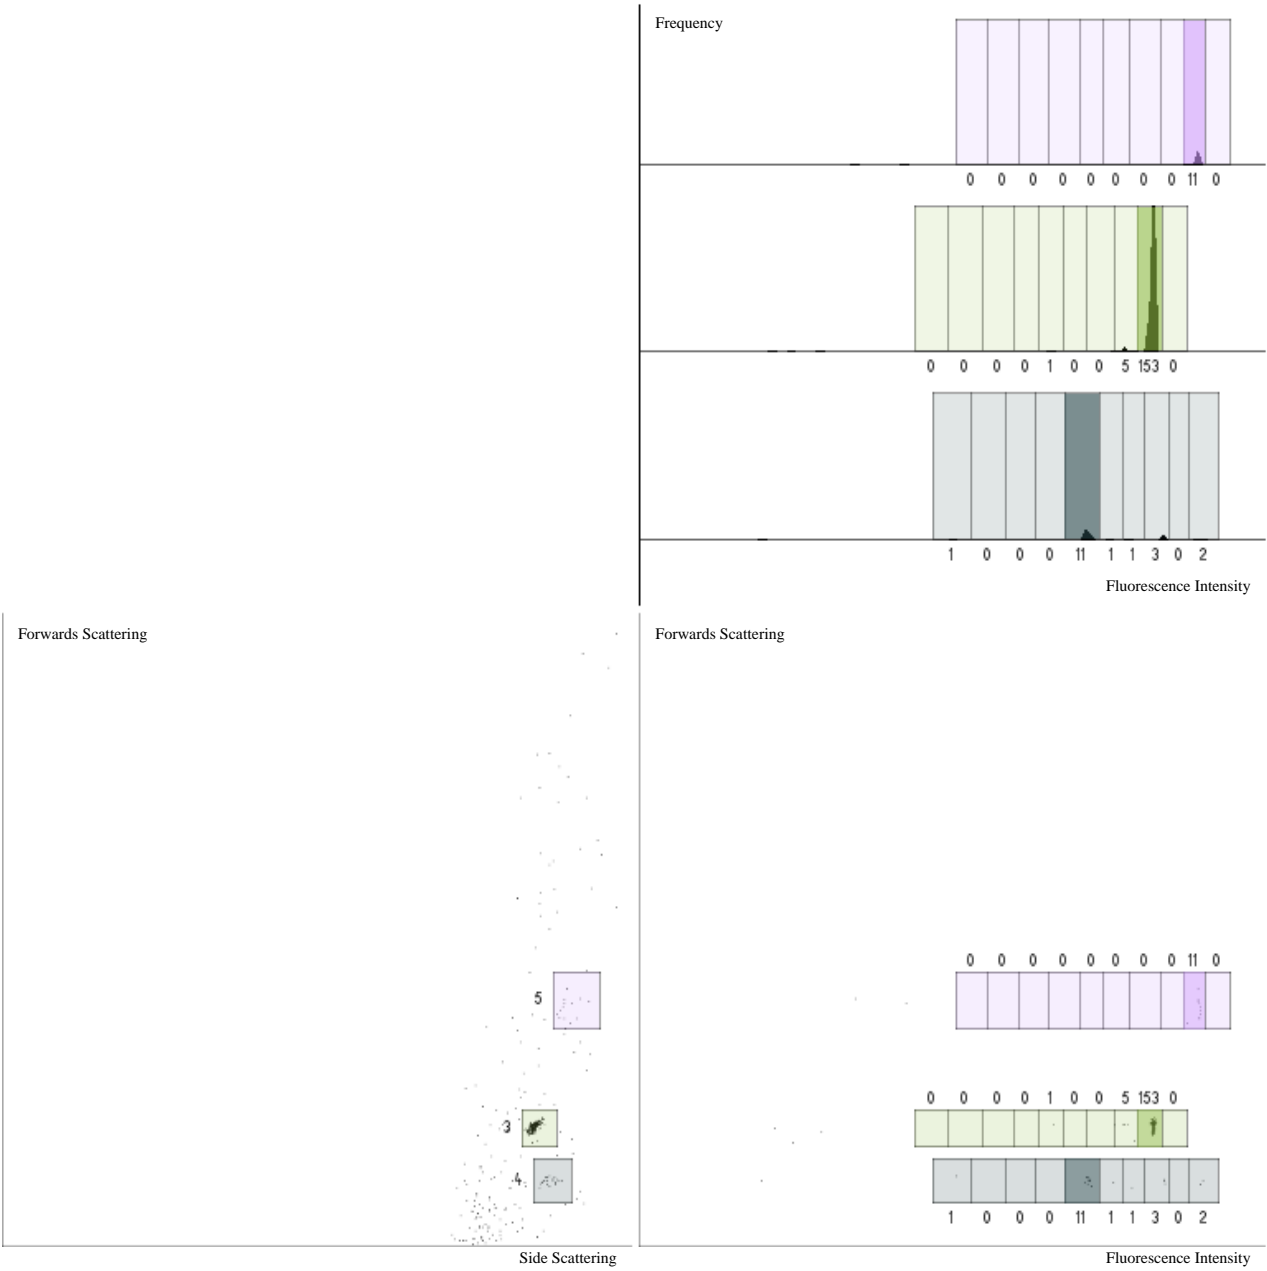



ANNEX 3: TAG DECONVOLUTION - BEAD 367

Passes flow sorting criteria: Yes  
Passes tag deconvolution criteria: Yes  
Included in protocol analysis: Yes  
Protocol: 1, 5, 10, 5  
Filename: Bin5\_plateA0\_F3.fcs  
Split 1: Petrol shading  
Split 2: Green shading  
Split 3: Violet shading

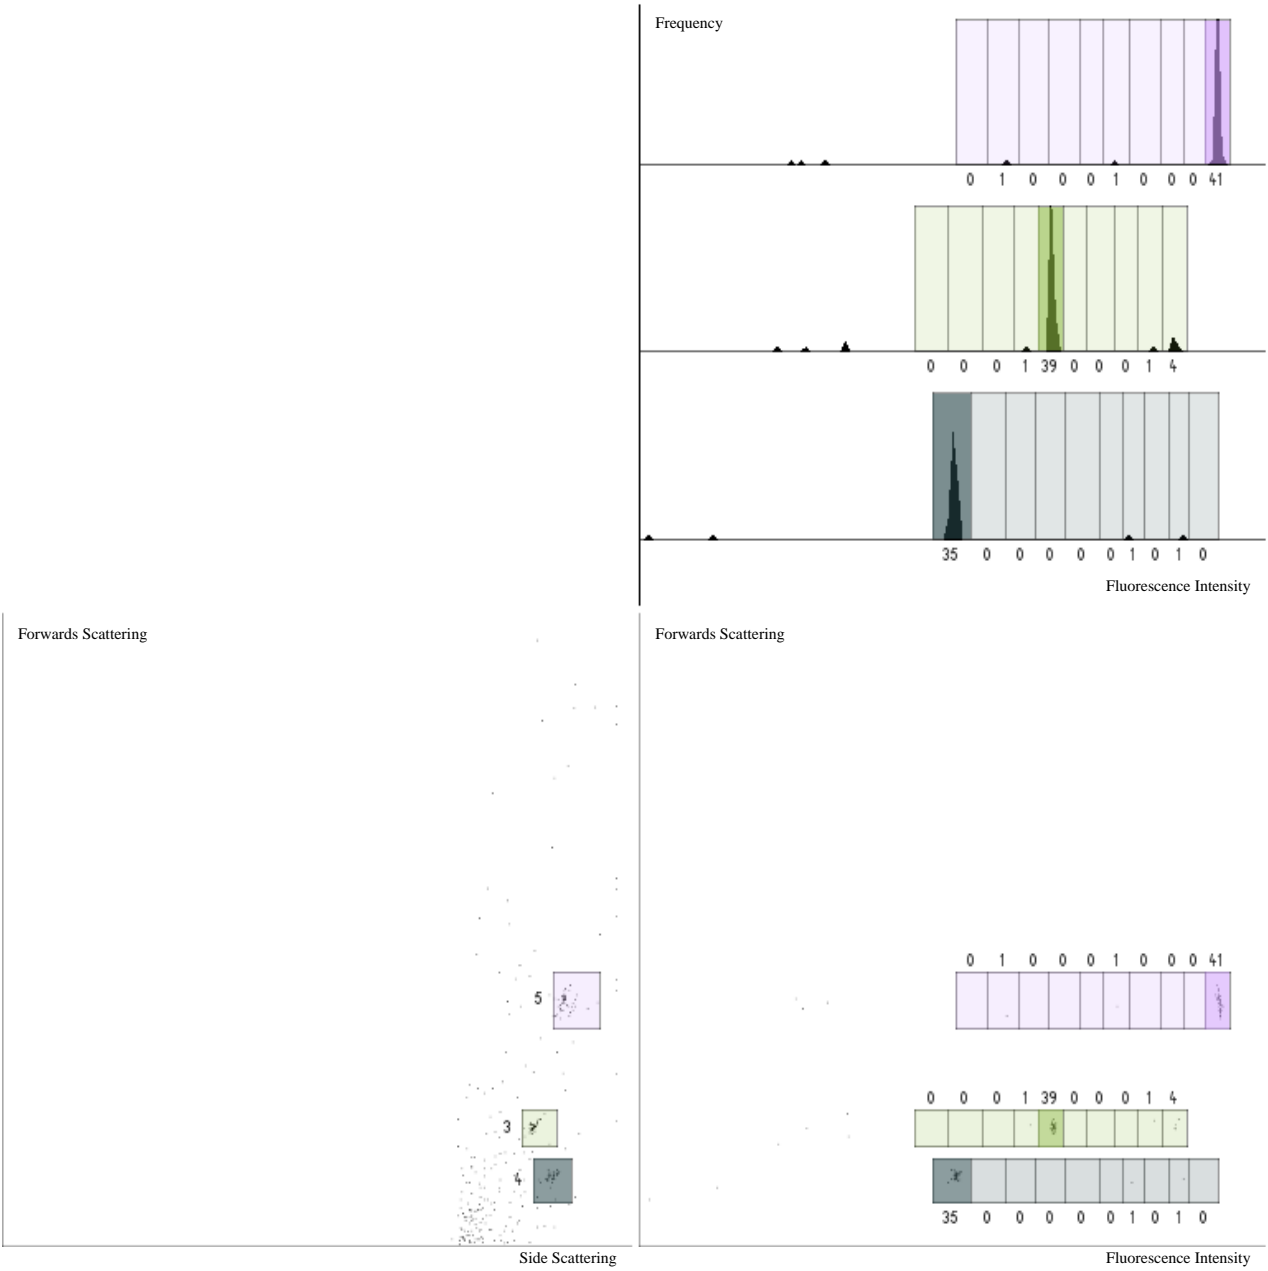

ANNEX 3: TAG DECONVOLUTION - BEAD 368

Passes flow sorting criteria: Yes  
Passes tag deconvolution criteria: Yes  
Included in protocol analysis: Yes  
Protocol: 1, 9, 7, 5  
Filename: Bin5\_plateA0\_F4.fcs  
Split 1: Petrol shading  
Split 2: Green shading  
Split 3: Violet shading

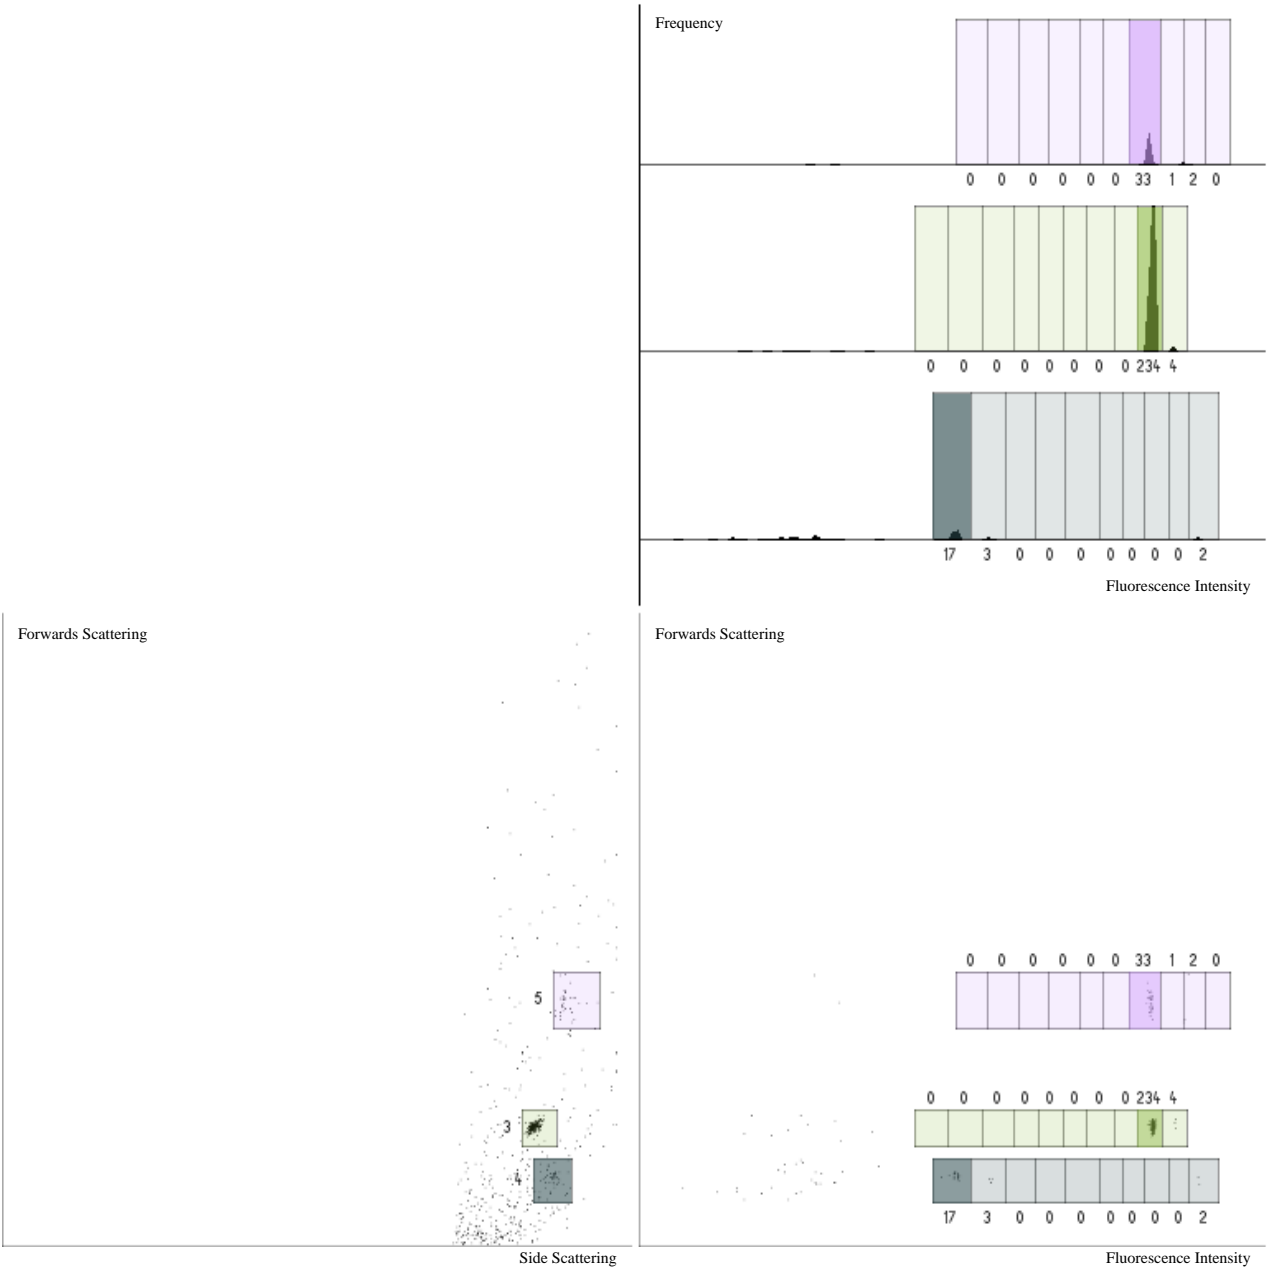

ANNEX 3: TAG DECONVOLUTION - BEAD 369

Passes flow sorting criteria: Yes  
Passes tag deconvolution criteria: No  
Included in protocol analysis: No  
Protocol: N/A  
Filename: Bin5\_plateA0\_F5.fcs  
Split 1: Petrol shading  
Split 2: Green shading  
Split 3: Violet shading

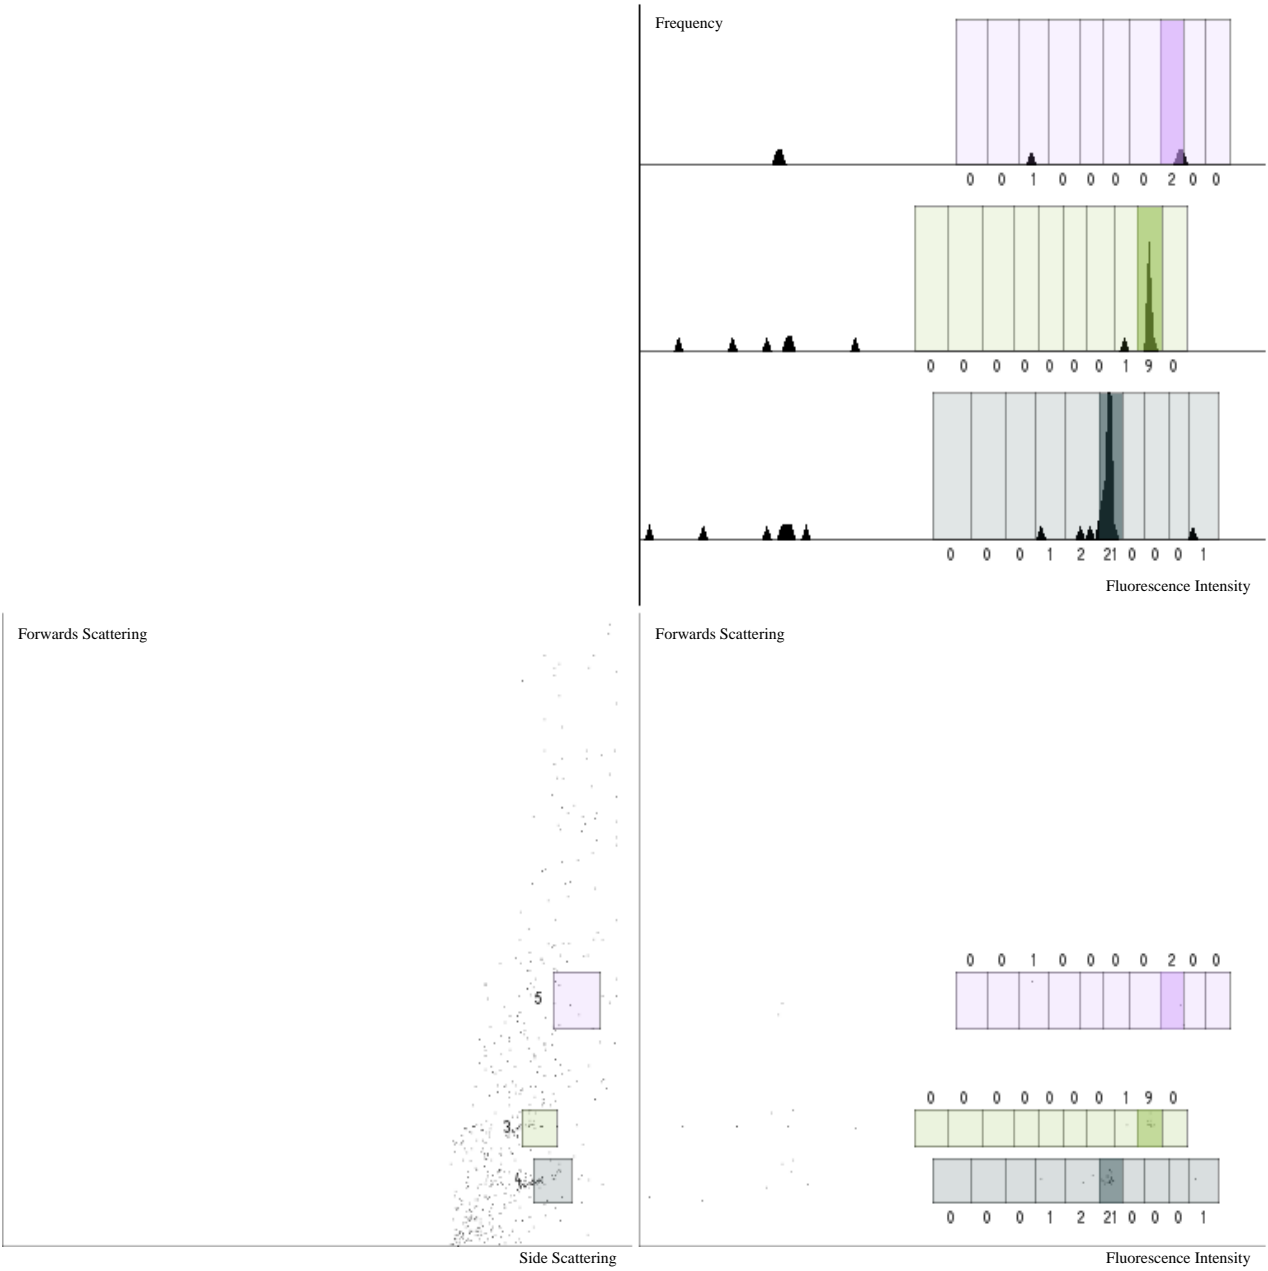

ANNEX 3: TAG DECONVOLUTION - BEAD 370

Passes flow sorting criteria: Yes  
Passes tag deconvolution criteria: Yes  
Included in protocol analysis: Yes  
Protocol: 10, 10, 8, 5  
Filename: Bin5\_plateA0\_F6.fcs  
Split 1: Petrol shading  
Split 2: Green shading  
Split 3: Violet shading

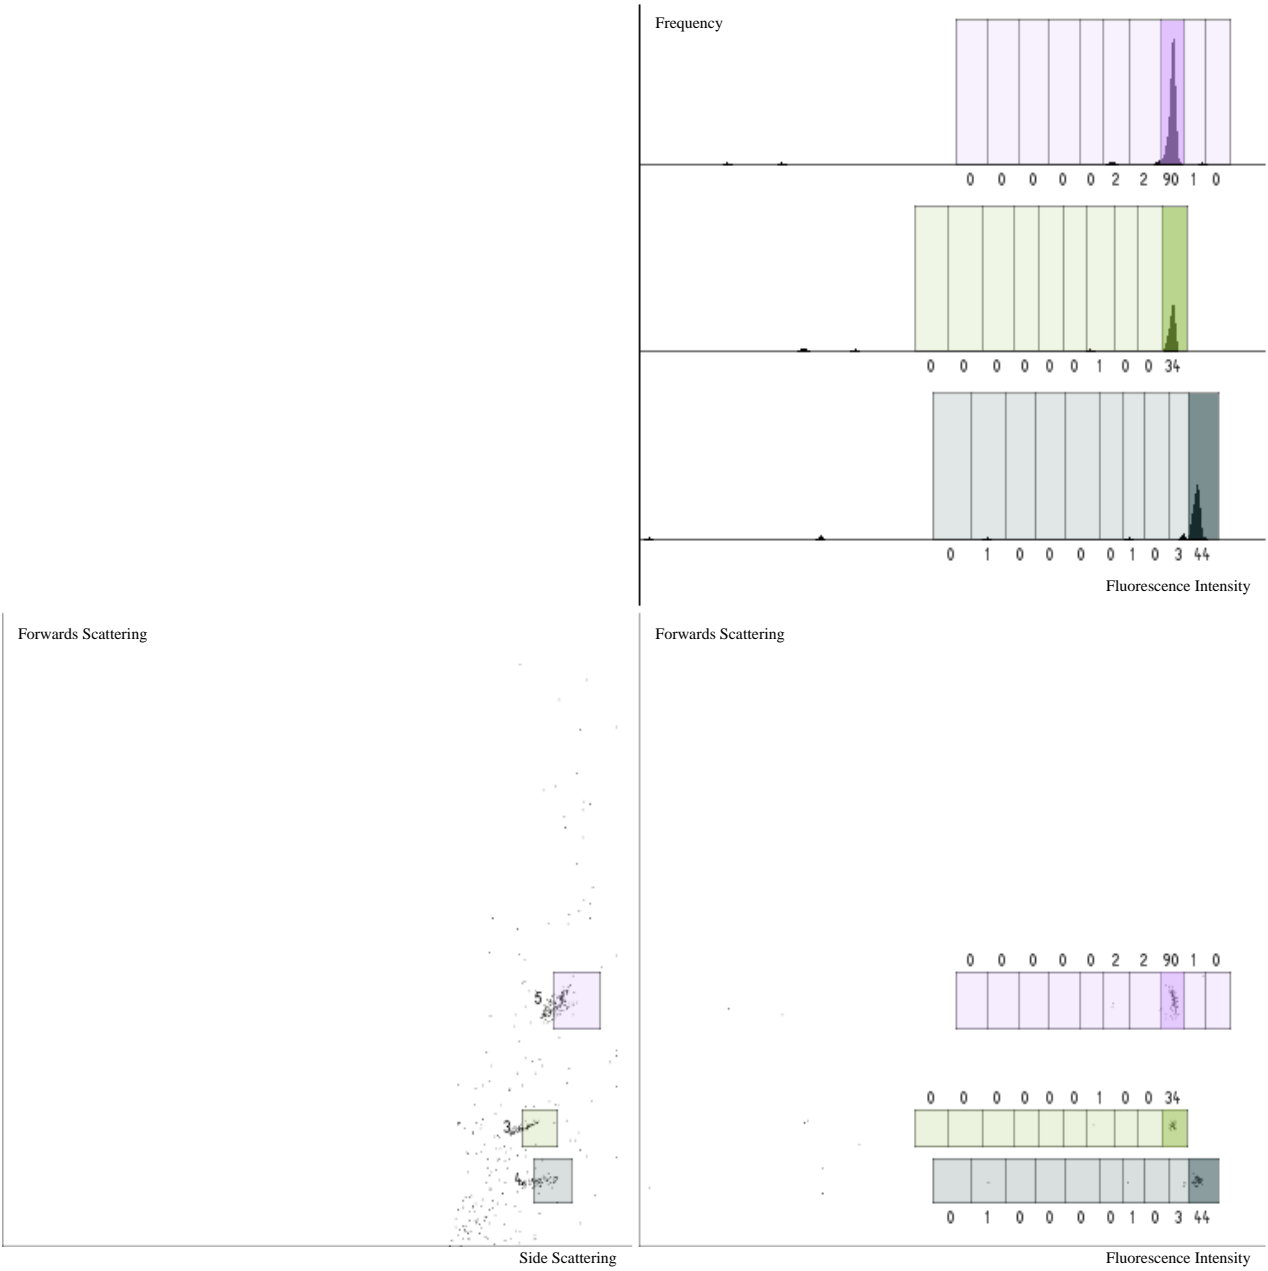

ANNEX 3: TAG DECONVOLUTION - BEAD 371

Passes flow sorting criteria: Yes  
Passes tag deconvolution criteria: No  
Included in protocol analysis: No  
Protocol: N/A  
Filename: Bin5\_plateA0\_F7.fcs  
Split 1: Petrol shading  
Split 2: Green shading  
Split 3: Violet shading

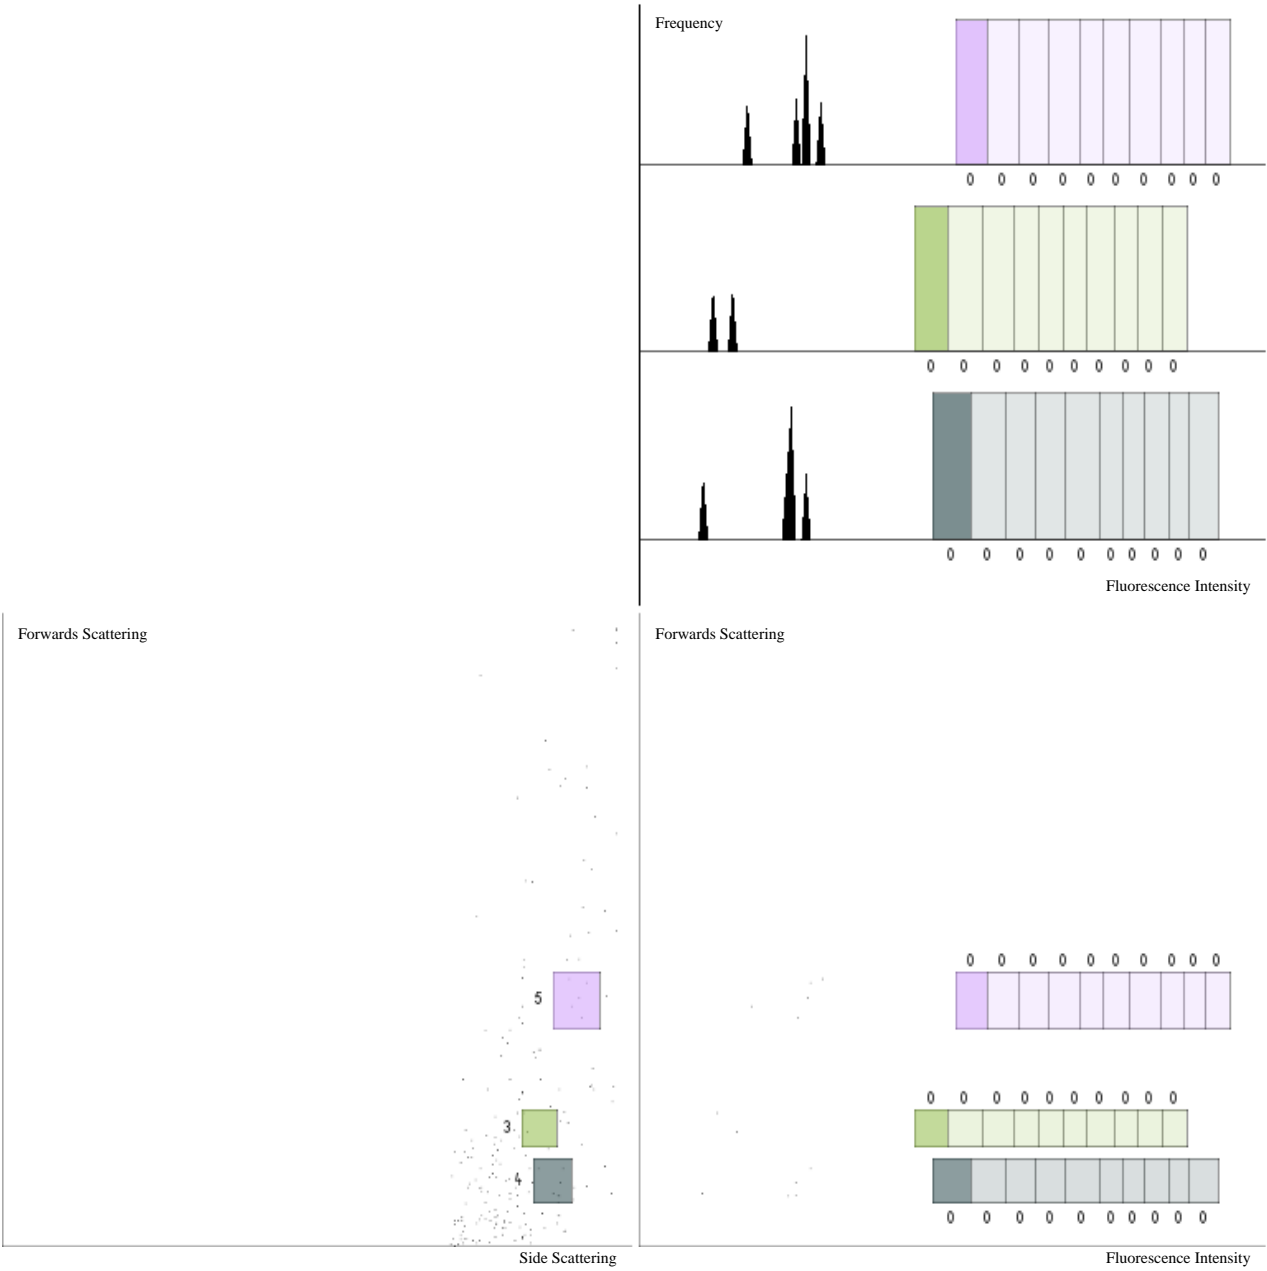

ANNEX 3: TAG DECONVOLUTION - BEAD 372

Passes flow sorting criteria: Yes  
Passes tag deconvolution criteria: Yes  
Included in protocol analysis: Yes  
Protocol: 1, 5, 2, 5  
Filename: Bin5\_plateA0\_F8.fcs  
Split 1: Petrol shading  
Split 2: Green shading  
Split 3: Violet shading

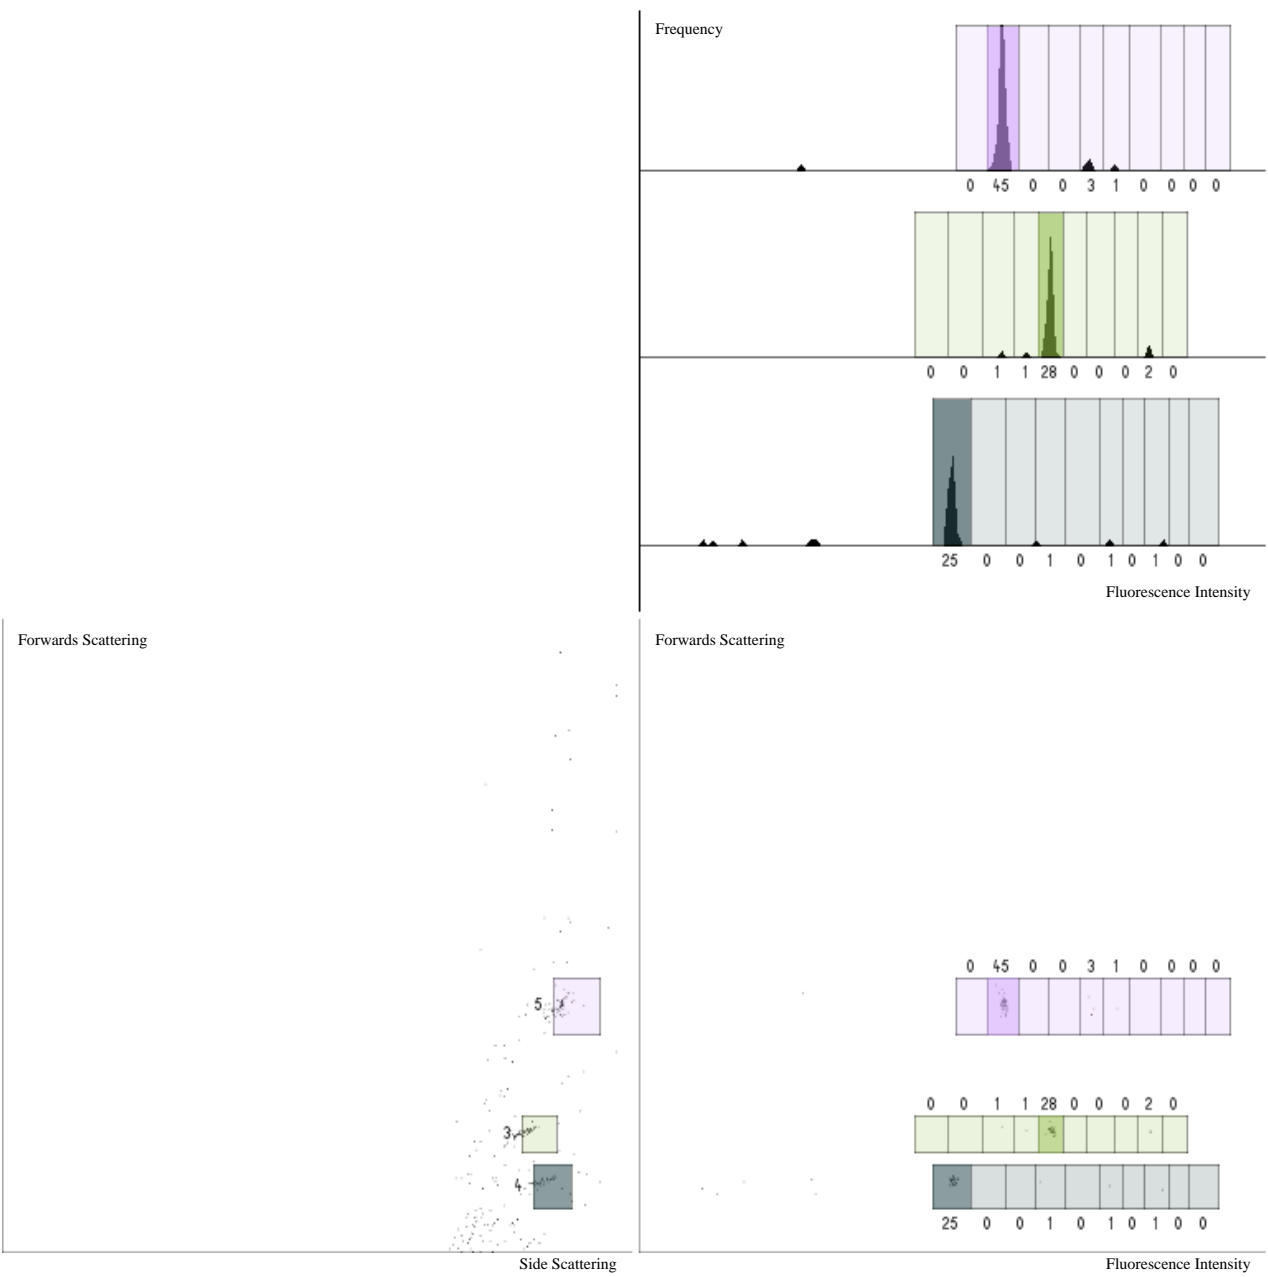

ANNEX 3: TAG DECONVOLUTION - BEAD 373

Passes flow sorting criteria: Yes  
Passes tag deconvolution criteria: Yes  
Included in protocol analysis: Yes  
Protocol: 5, 10, 6, 5  
Filename: Bin5\_plateA0\_F9.fcs  
Split 1: Petrol shading  
Split 2: Green shading  
Split 3: Violet shading

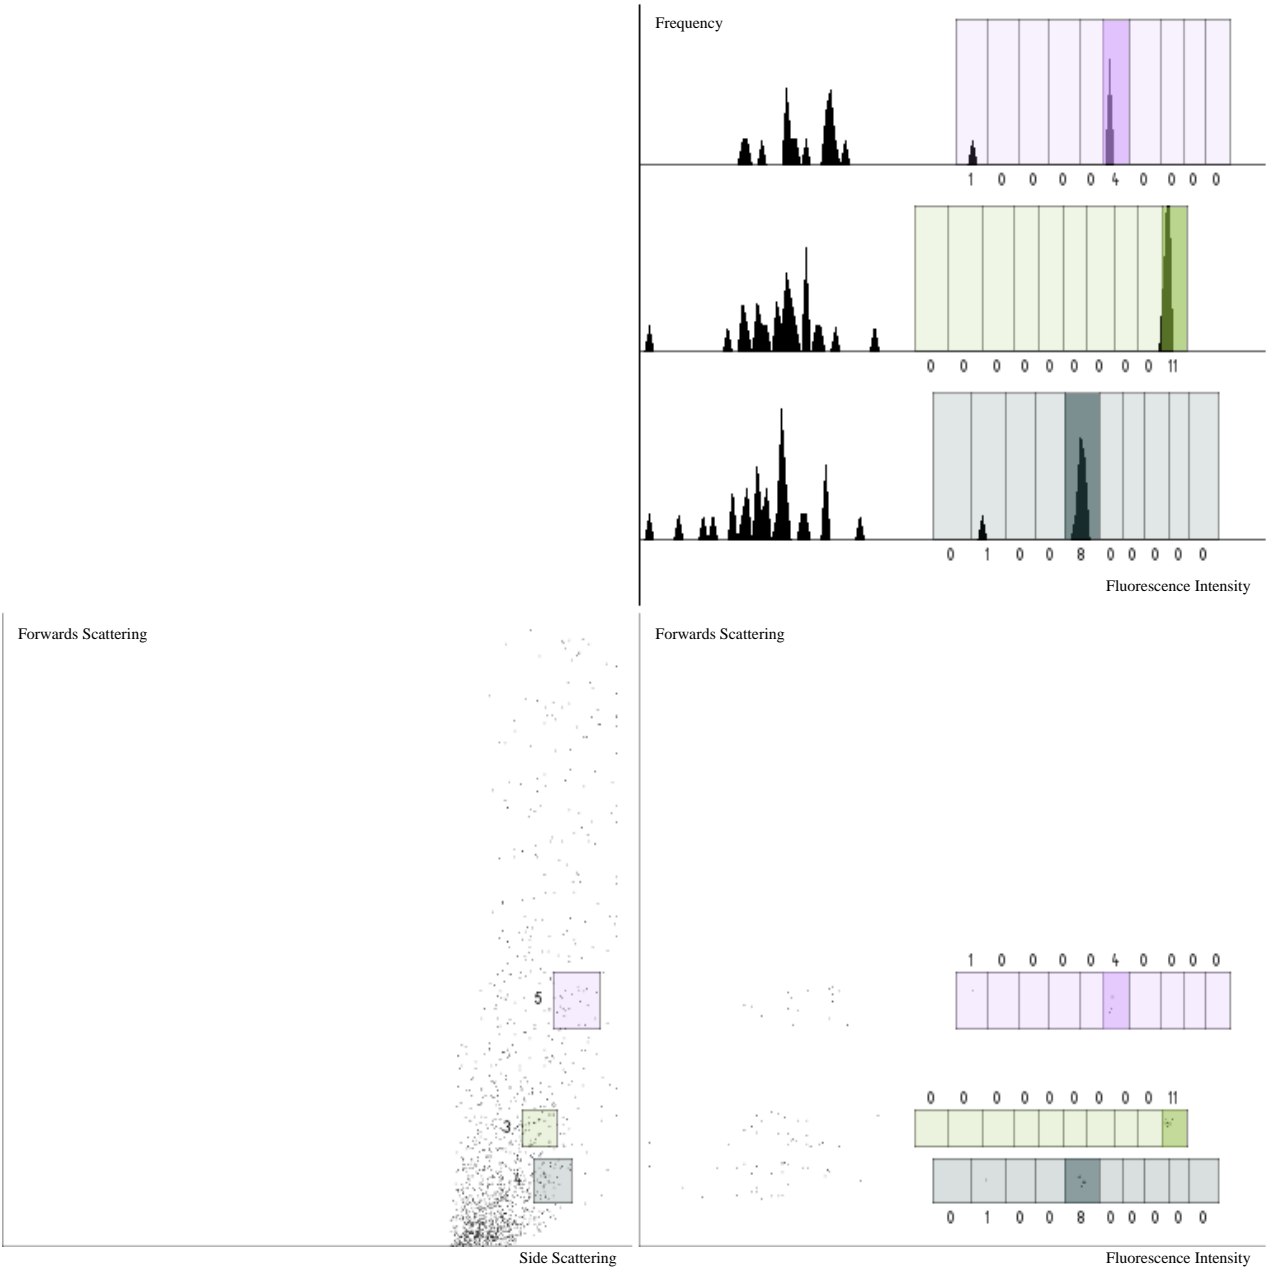

ANNEX 3: TAG DECONVOLUTION - BEAD 374

Passes flow sorting criteria: Yes  
Passes tag deconvolution criteria: Yes  
Included in protocol analysis: Yes  
Protocol: 9, 9, 10, 5  
Filename: Bin5\_plateA0\_F10.fcs  
Split 1: Petrol shading  
Split 2: Green shading  
Split 3: Violet shading

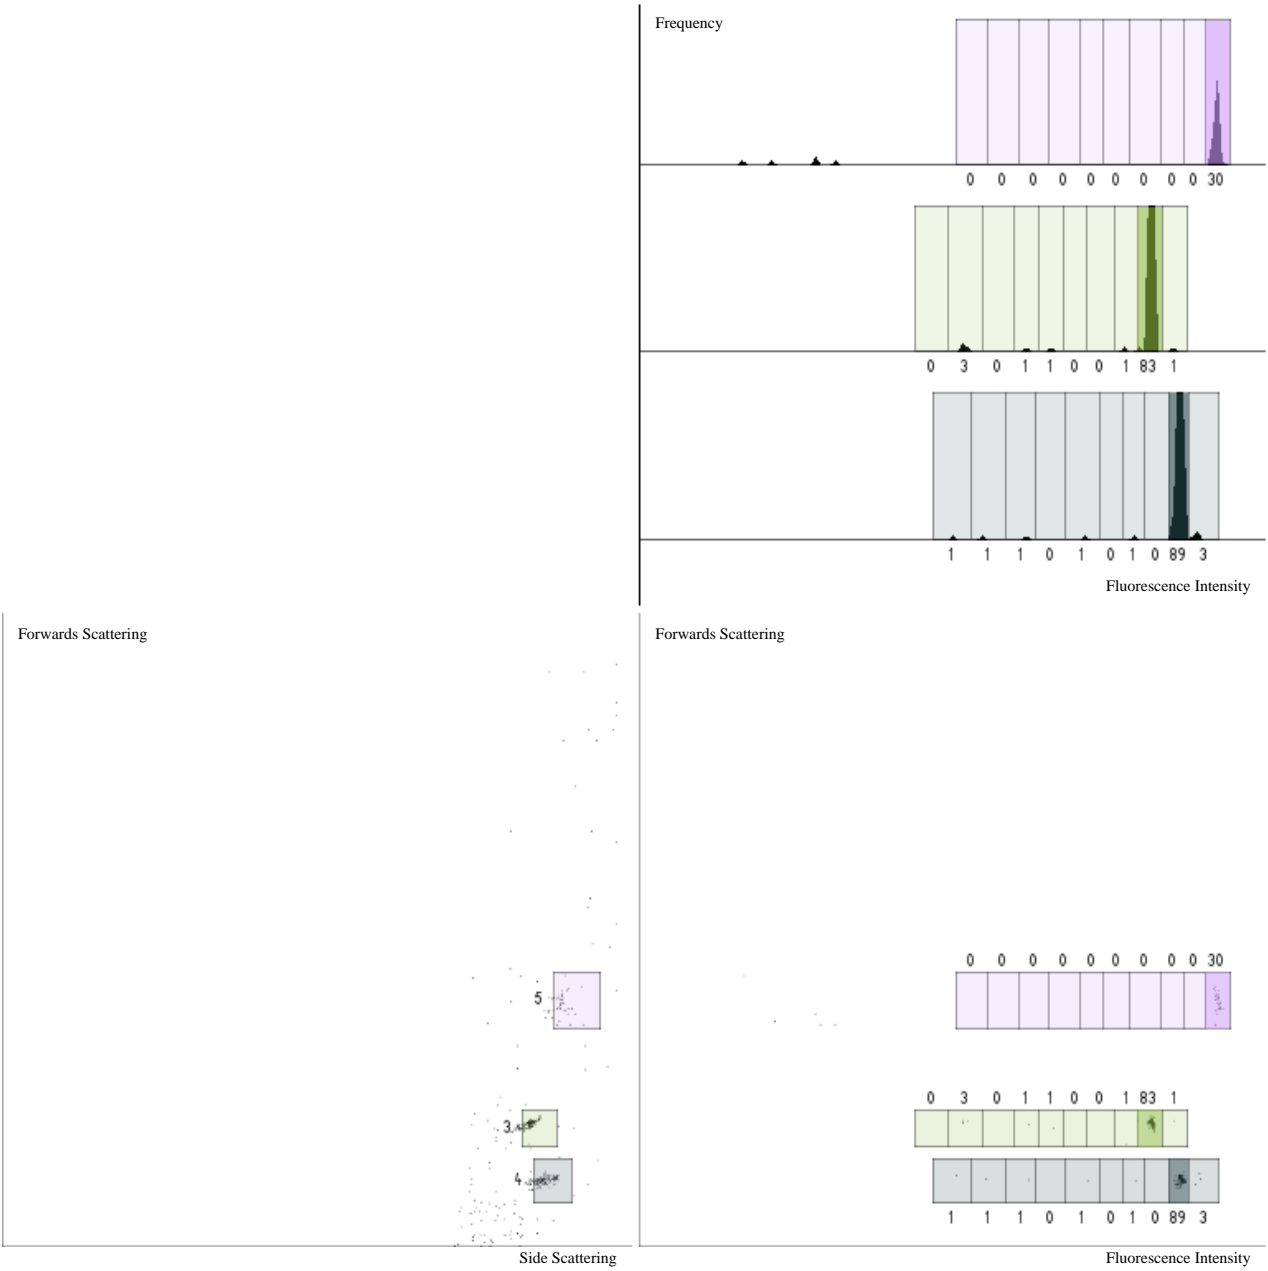



ANNEX 3: TAG DECONVOLUTION - BEAD 375

Passes flow sorting criteria: Yes  
Passes tag deconvolution criteria: Yes  
Included in protocol analysis: Yes  
Protocol: 7, 8, 5, 5  
Filename: Bin5\_plateA0\_F12.fcs  
Split 1: Petrol shading  
Split 2: Green shading  
Split 3: Violet shading

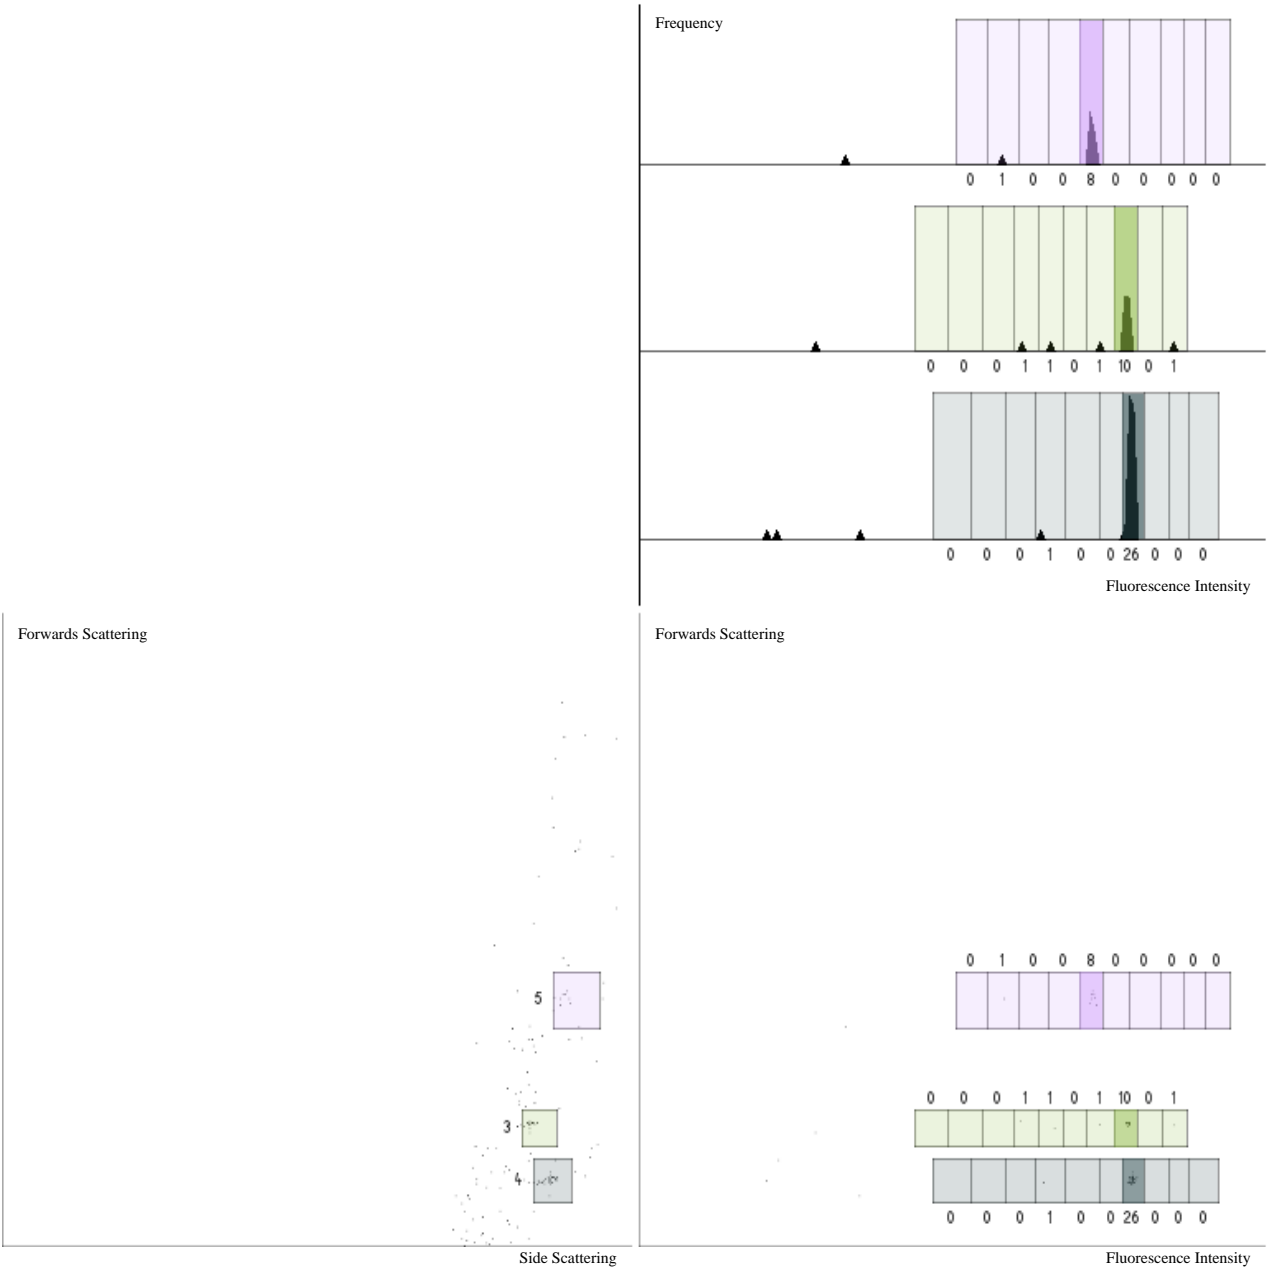

ANNEX 3: TAG DECONVOLUTION - BEAD 376

Passes flow sorting criteria: Yes  
Passes tag deconvolution criteria: Yes  
Included in protocol analysis: Yes  
Protocol: 4, 2, 3, 5  
Filename: Bin5\_plateA0\_G2.fcs  
Split 1: Petrol shading  
Split 2: Green shading  
Split 3: Violet shading

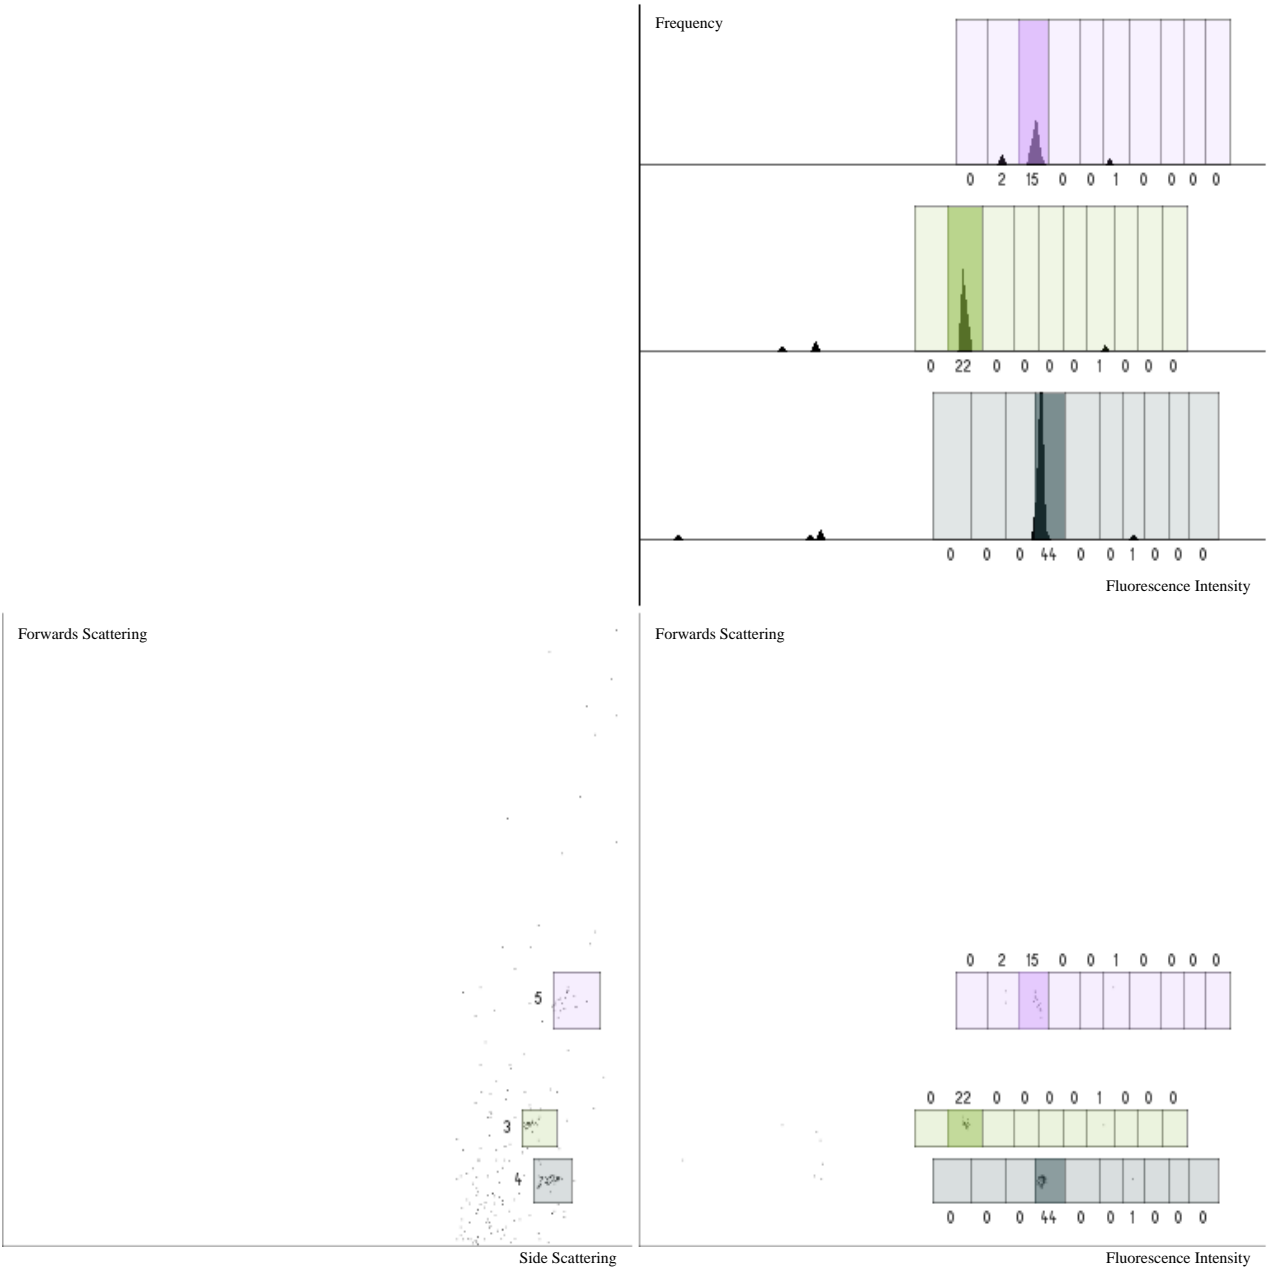

ANNEX 3: TAG DECONVOLUTION - BEAD 377

Passes flow sorting criteria: Yes  
Passes tag deconvolution criteria: Yes  
Included in protocol analysis: Yes  
Protocol: 3, 6, 3, 5  
Filename: Bin5\_plateA0\_G3.fcs  
Split 1: Petrol shading  
Split 2: Green shading  
Split 3: Violet shading

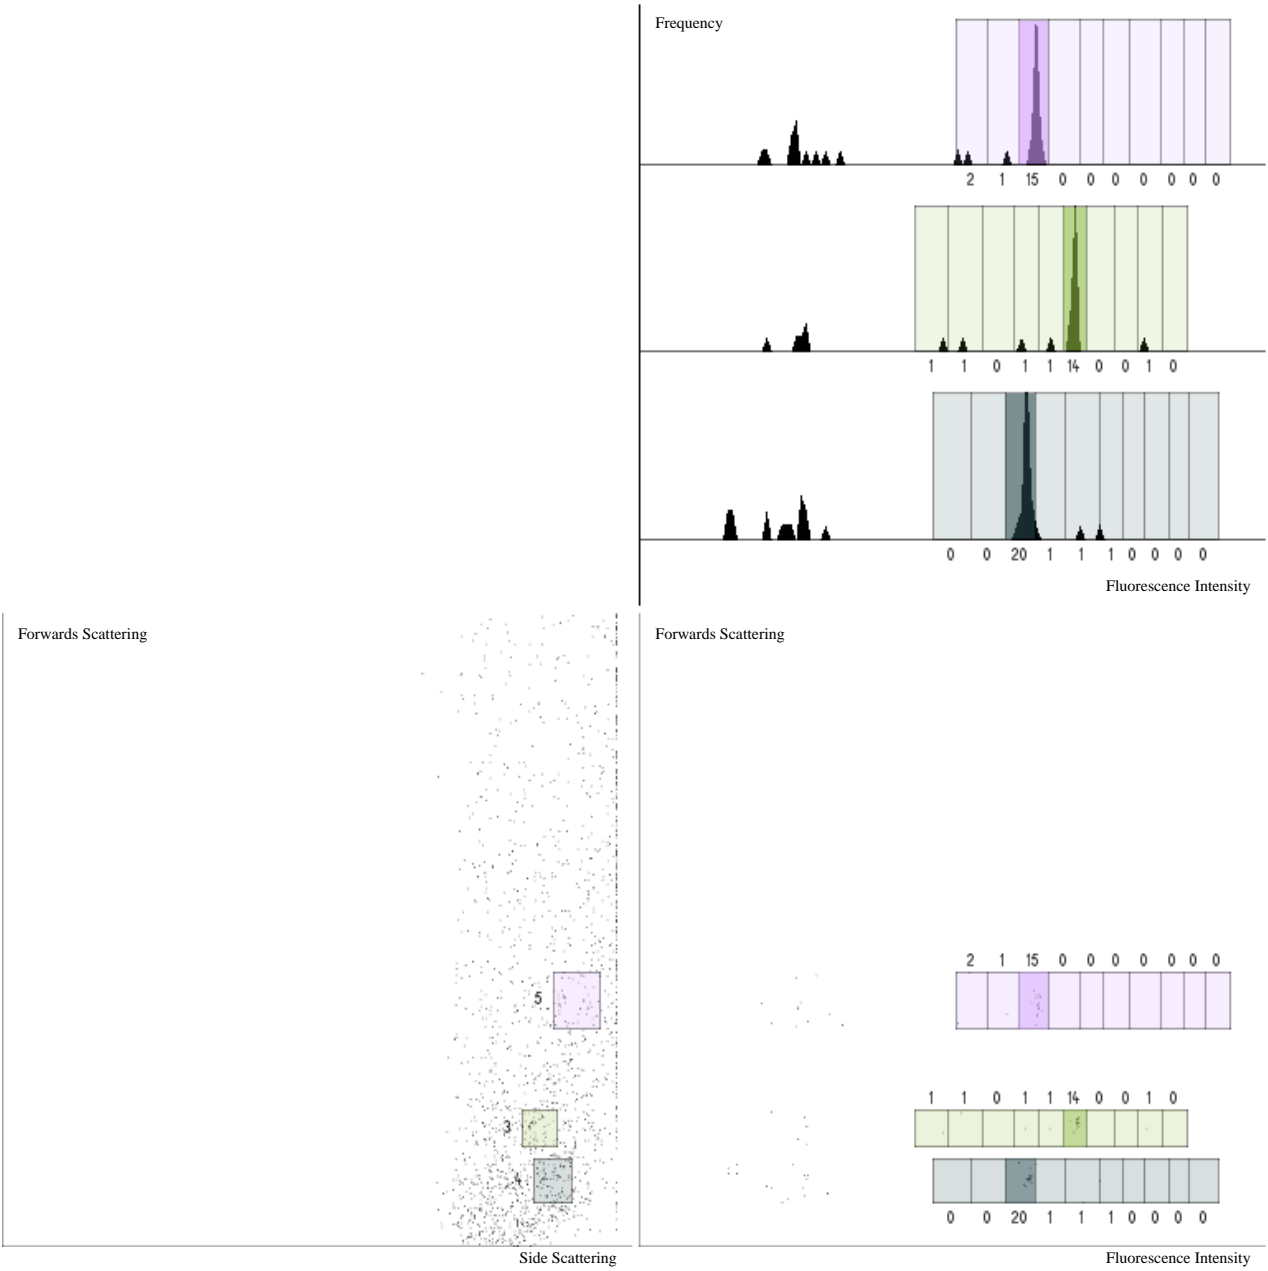

ANNEX 3: TAG DECONVOLUTION - BEAD 378

Passes flow sorting criteria: Yes  
Passes tag deconvolution criteria: Yes  
Included in protocol analysis: Yes  
Protocol: 1, 6, 8, 5  
Filename: Bin5\_plateA0\_G4.fcs  
Split 1: Petrol shading  
Split 2: Green shading  
Split 3: Violet shading

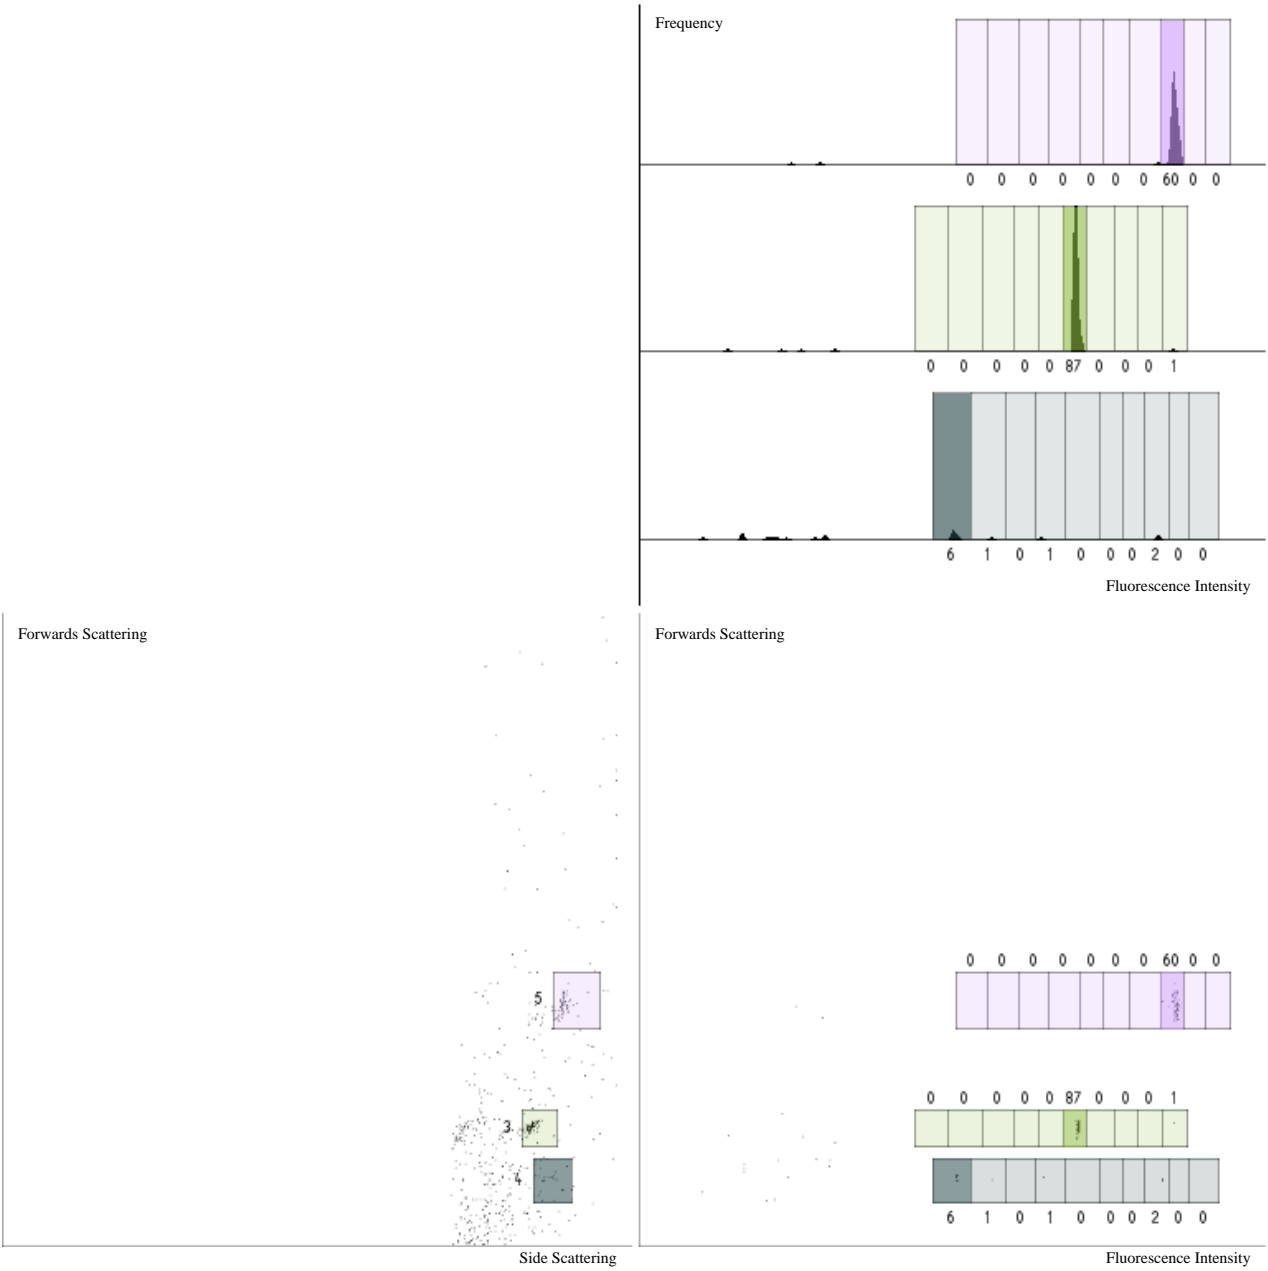

ANNEX 3: TAG DECONVOLUTION - BEAD 379

Passes flow sorting criteria: Yes  
Passes tag deconvolution criteria: Yes  
Included in protocol analysis: Yes  
Protocol: 1, 5, 1, 7  
Filename: Bin7\_plateA0\_C3.fcs  
Split 1: Petrol shading  
Split 2: Green shading  
Split 3: Violet shading

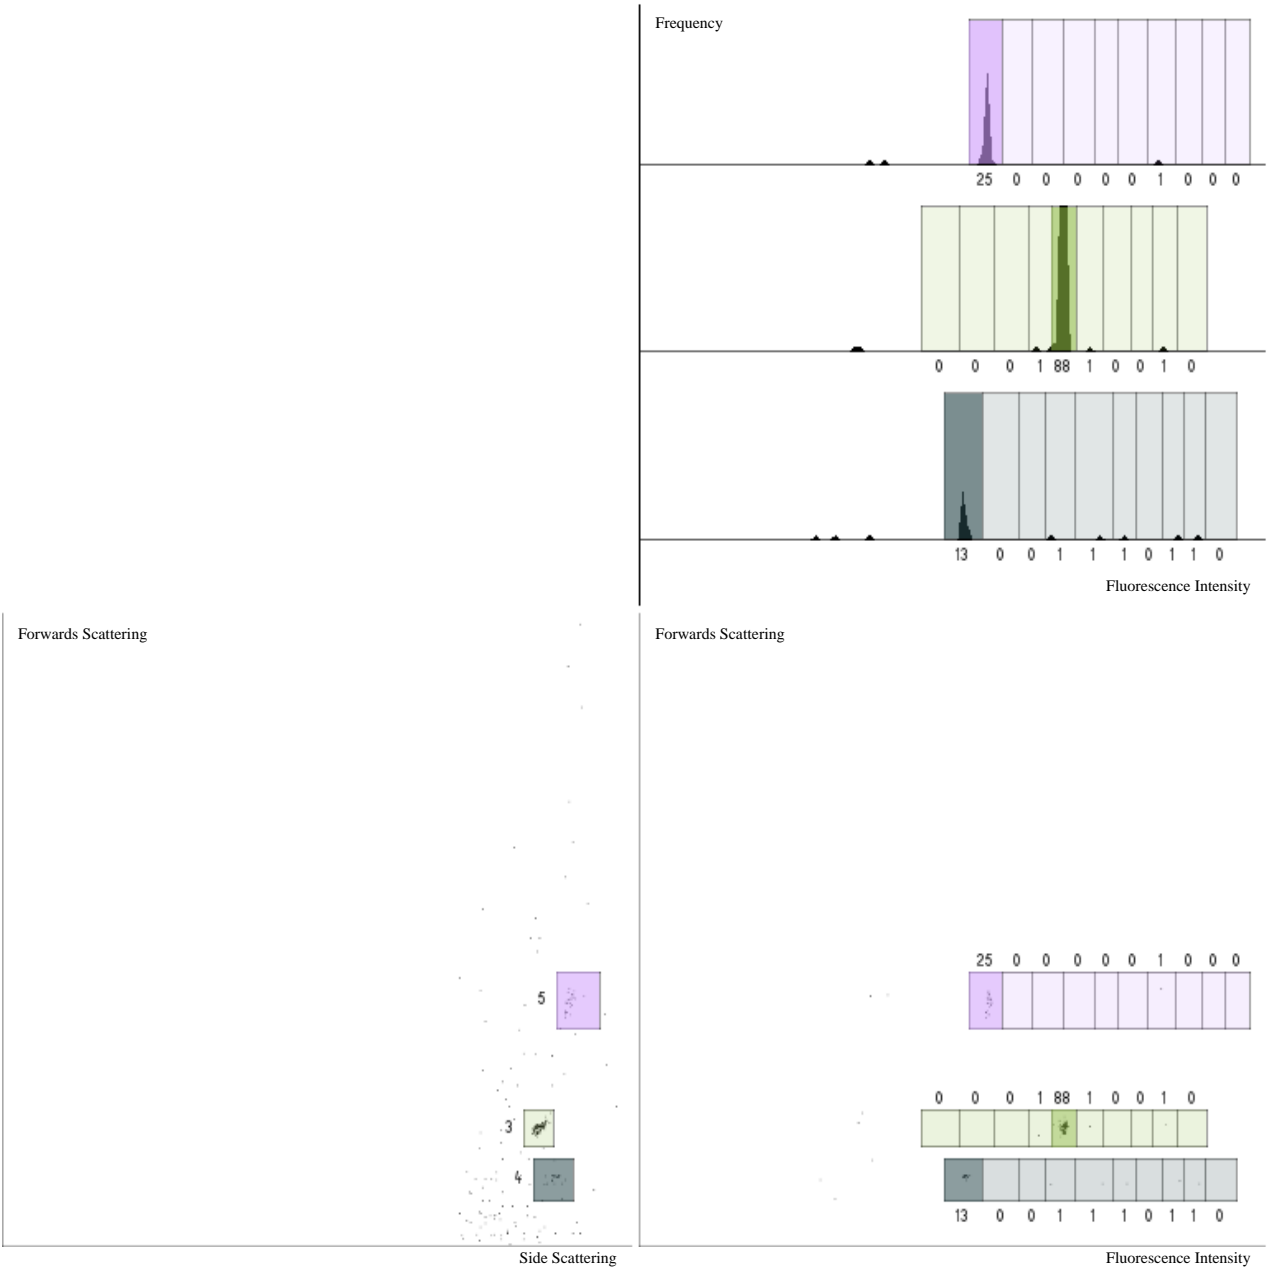

ANNEX 3: TAG DECONVOLUTION - BEAD 380

Passes flow sorting criteria: Yes  
Passes tag deconvolution criteria: Yes  
Included in protocol analysis: Yes  
Protocol: 1, 5, 3, 6  
Filename: Bin6\_plateA2\_A1.fcs  
Split 1: Petrol shading  
Split 2: Green shading  
Split 3: Violet shading

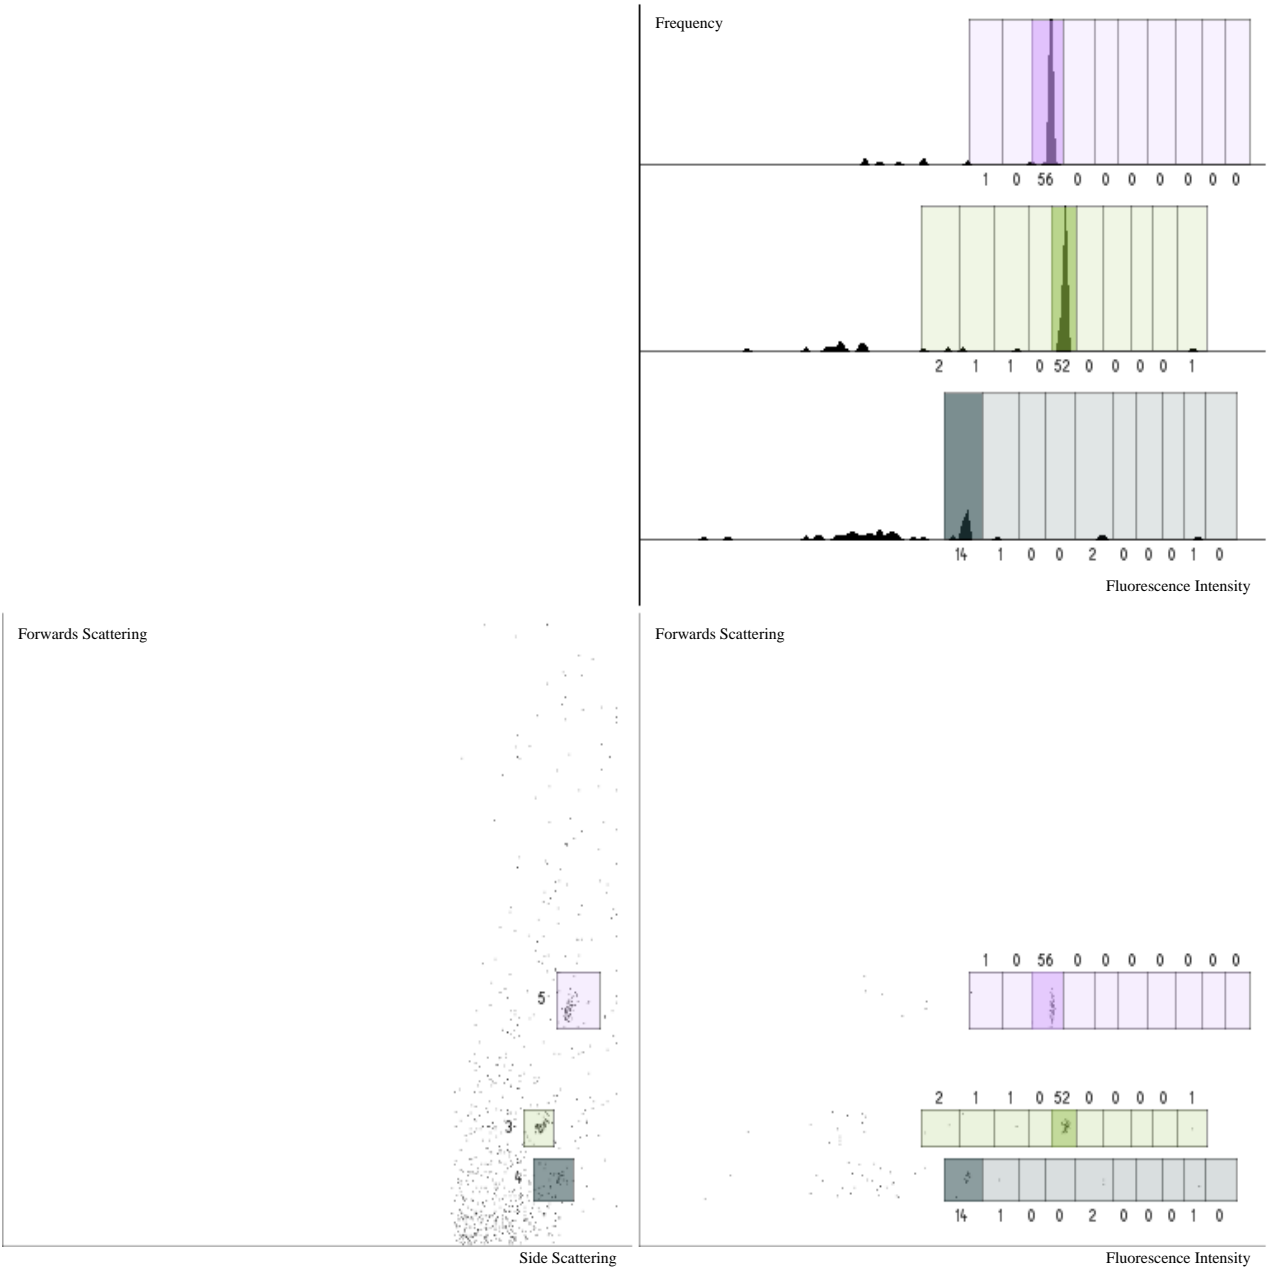

## ANNEX 3: TAG DECONVOLUTION - BEAD 381

Passes flow sorting criteria: Yes

Passes tag deconvolution criteria: No

Included in protocol analysis: No

Protocol: N/A

Filename: Bin6\_plateA2\_A2.fcs

### Split 1: Petrol shading

Split 2: Green shading

### Split 3: Violet shading

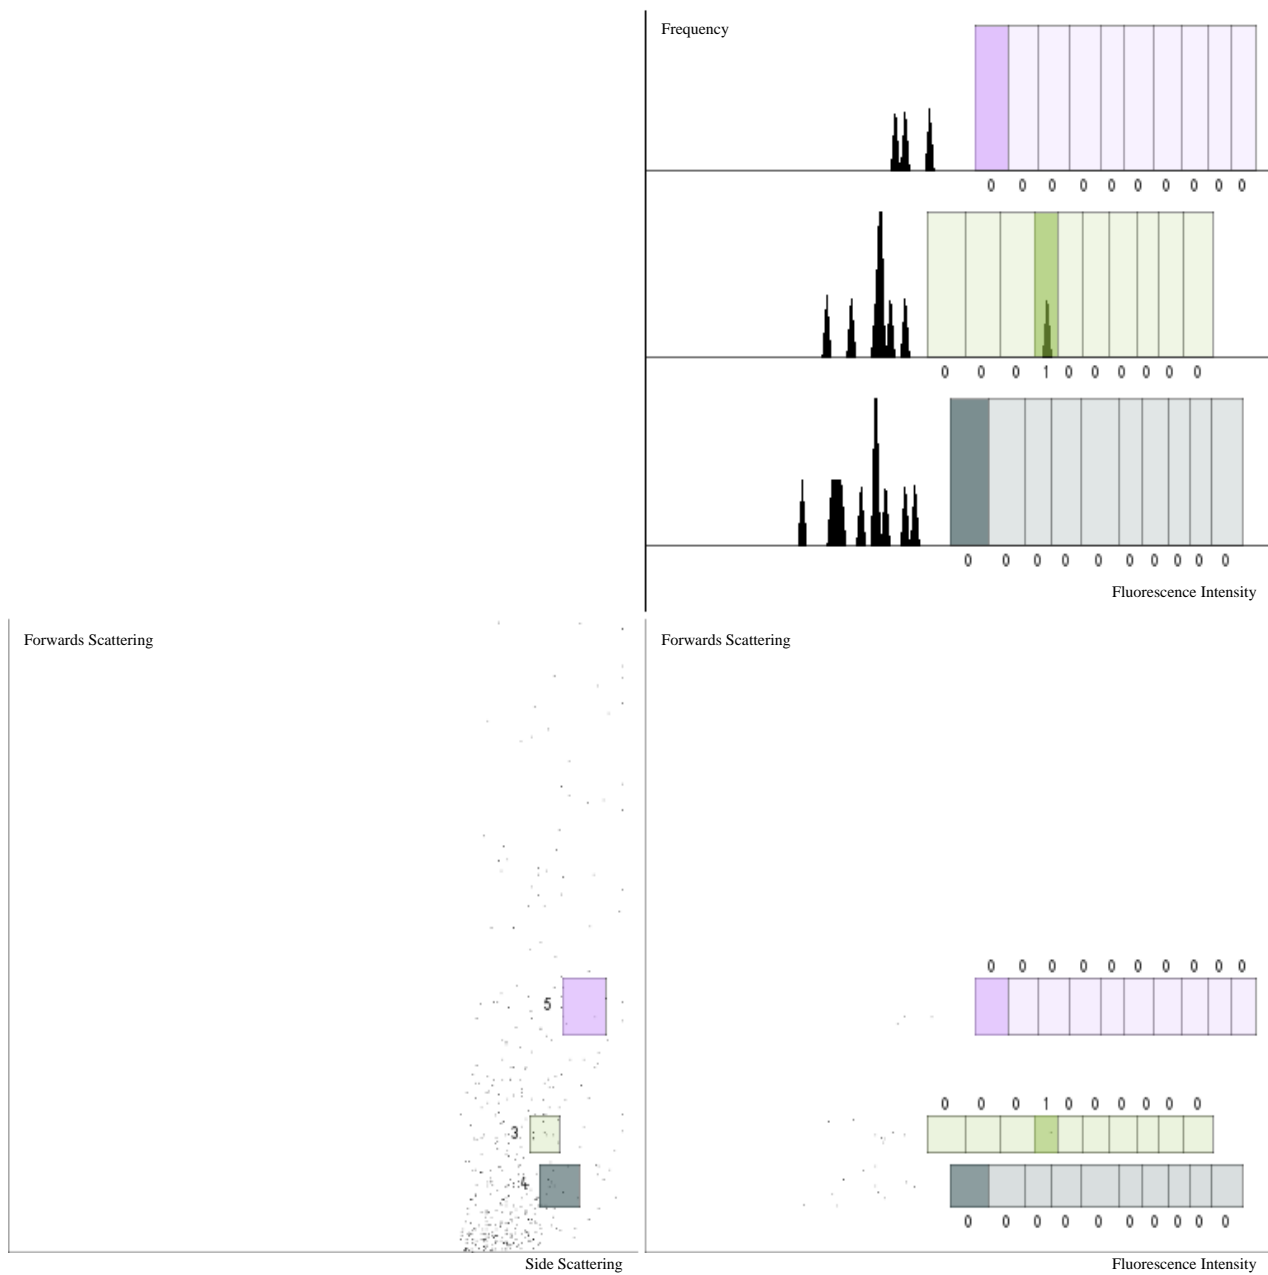

ANNEX 3: TAG DECONVOLUTION - BEAD 382

Passes flow sorting criteria: Yes  
Passes tag deconvolution criteria: Yes  
Included in protocol analysis: Yes  
Protocol: 3, 1, 2, 6  
Filename: Bin6\_plateA2\_A4.fcs  
Split 1: Petrol shading  
Split 2: Green shading  
Split 3: Violet shading

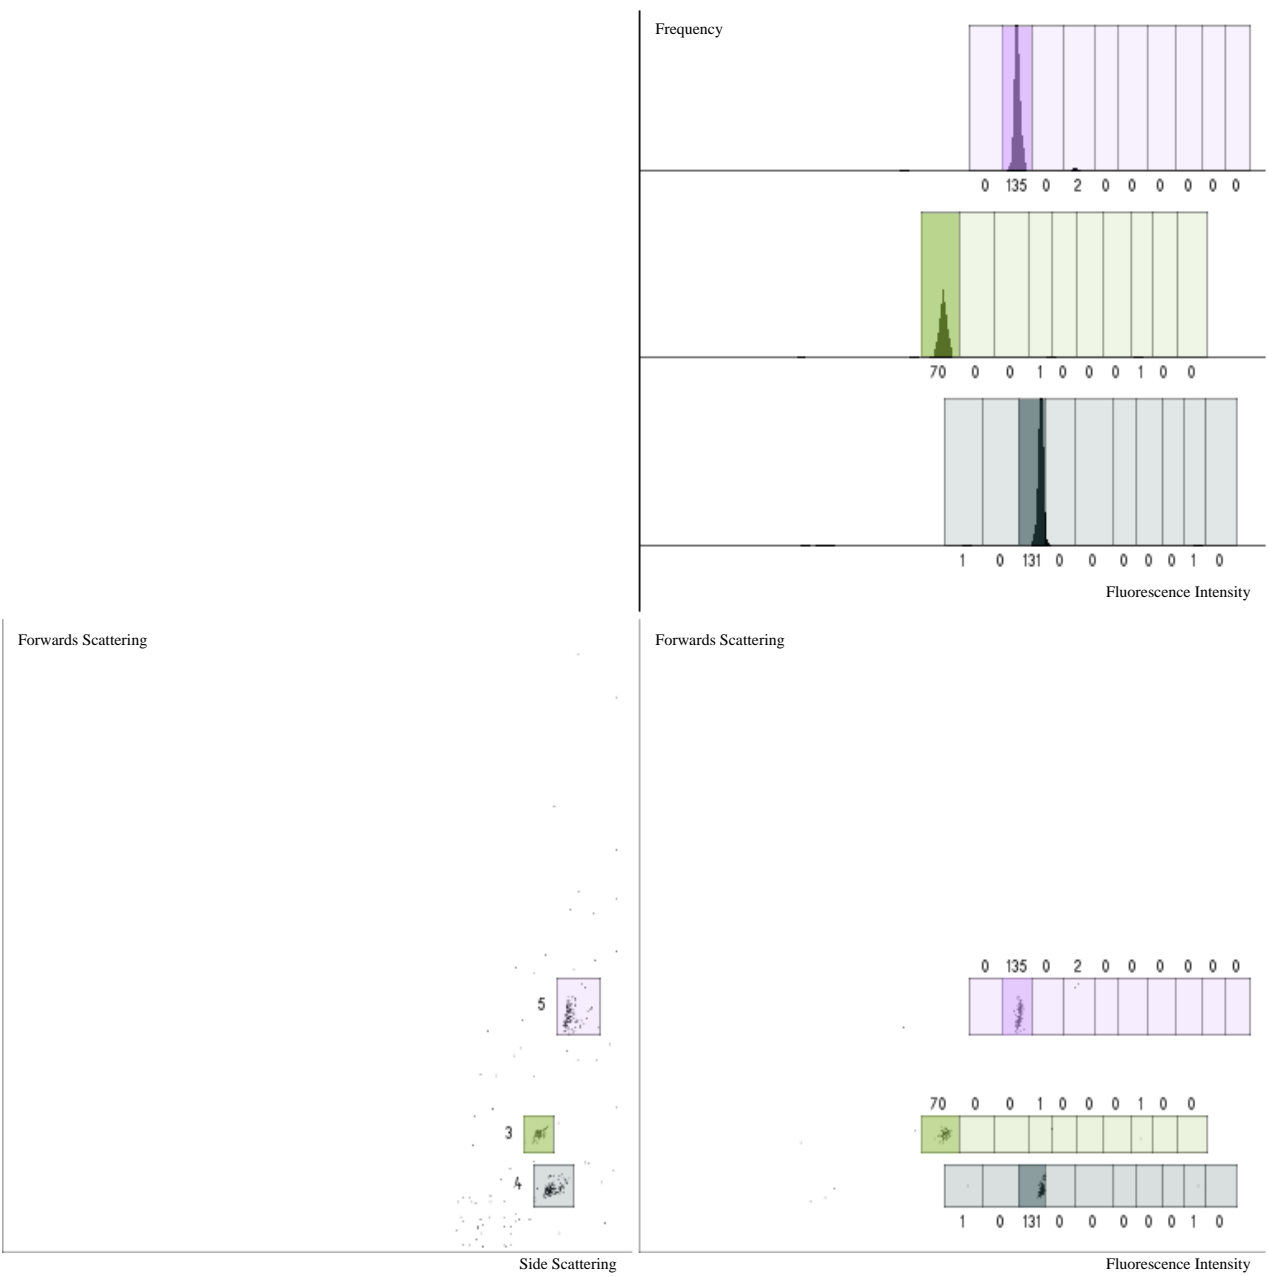



ANNEX 3: TAG DECONVOLUTION - BEAD 383

Passes flow sorting criteria: Yes  
Passes tag deconvolution criteria: Yes  
Included in protocol analysis: Yes  
Protocol: 9, 6, 10, 6  
Filename: Bin6\_plateA2\_A5.fcs  
Split 1: Petrol shading  
Split 2: Green shading  
Split 3: Violet shading

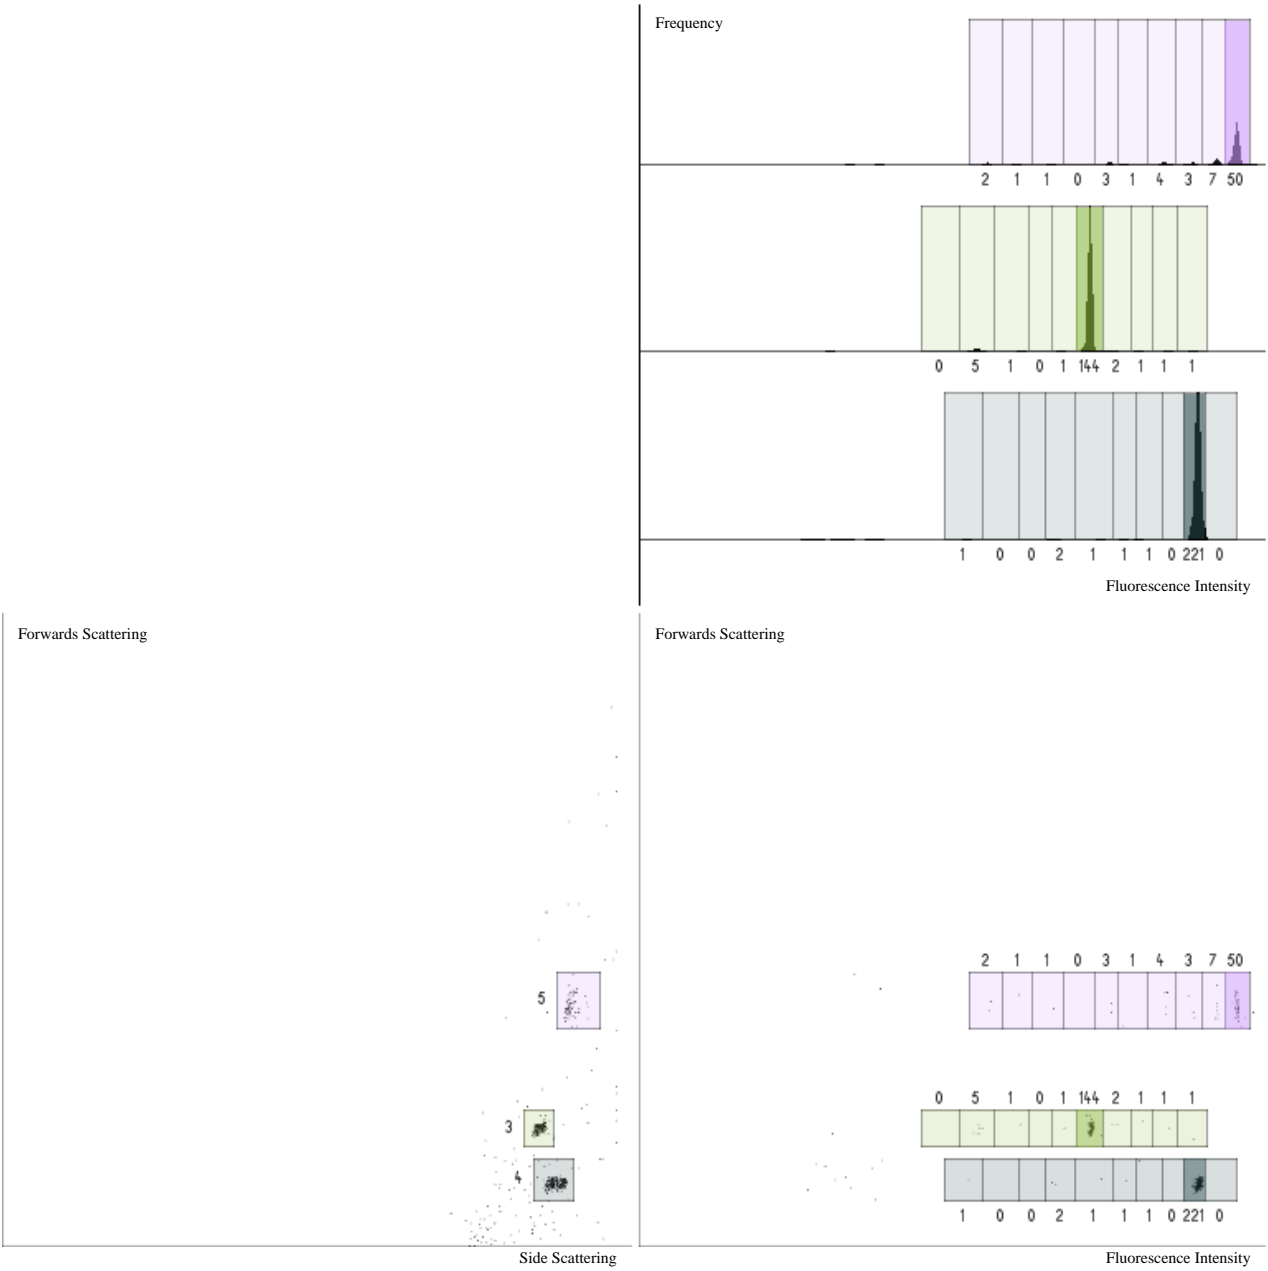

ANNEX 3: TAG DECONVOLUTION - BEAD 384

Passes flow sorting criteria: Yes  
Passes tag deconvolution criteria: Yes  
Included in protocol analysis: Yes  
Protocol: 5, 7, 1, 6  
Filename: Bin6\_plateA2\_A6.fcs  
Split 1: Petrol shading  
Split 2: Green shading  
Split 3: Violet shading

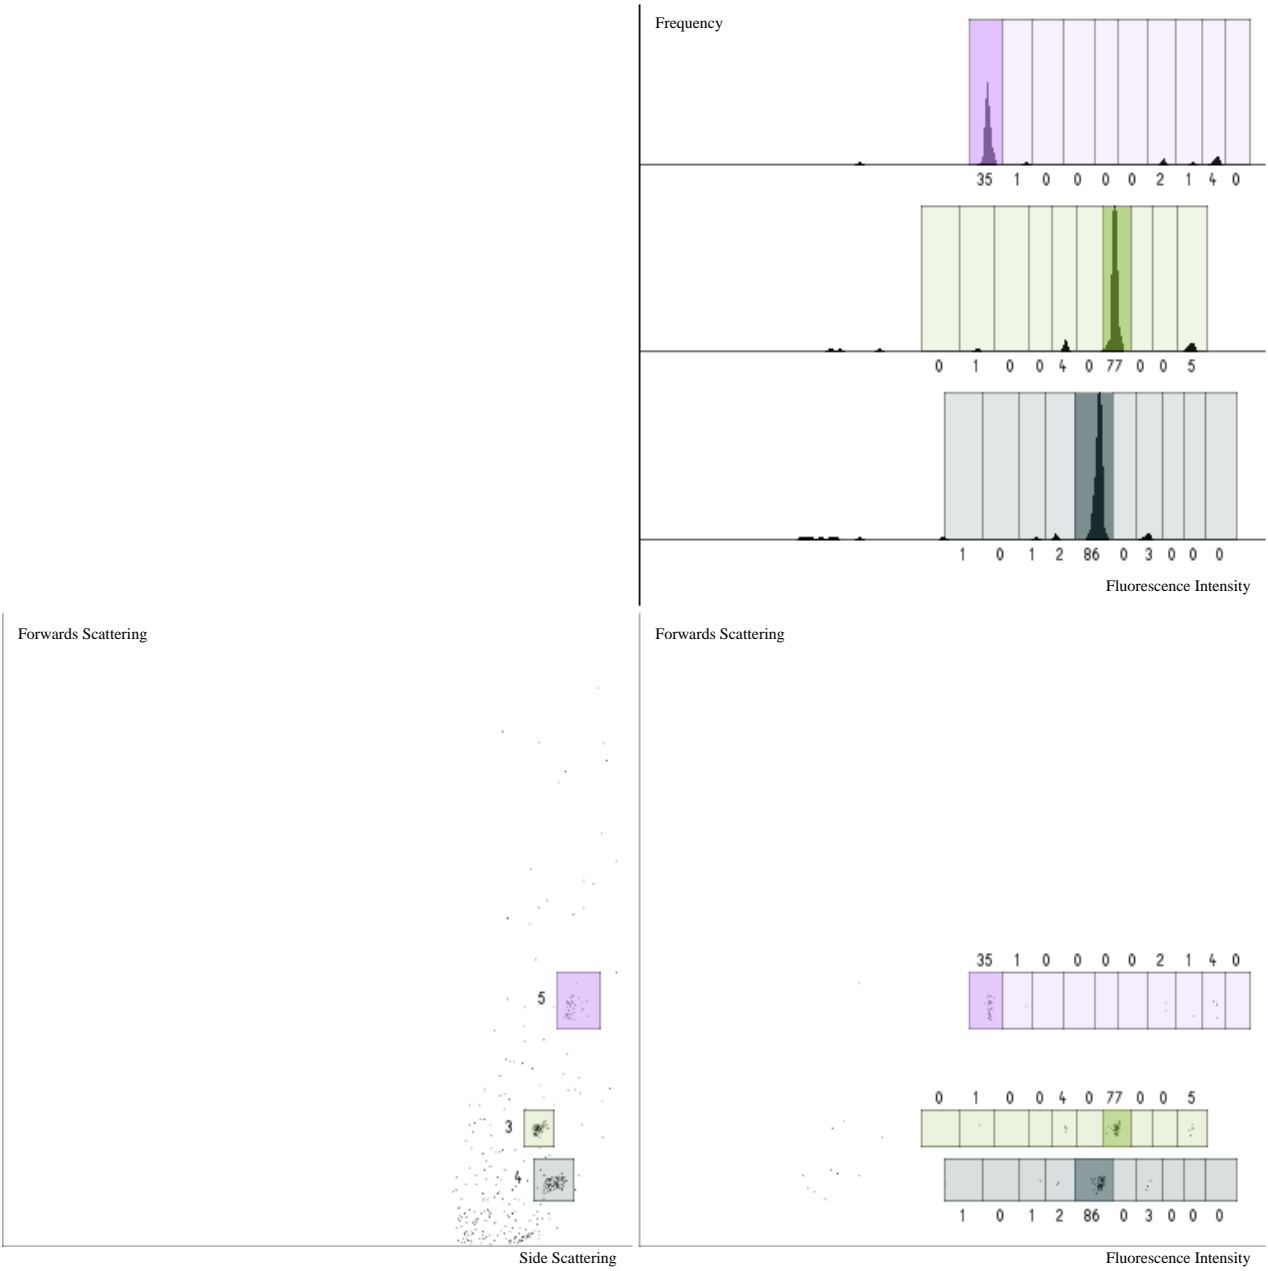

ANNEX 3: TAG DECONVOLUTION - BEAD 385

Passes flow sorting criteria: Yes  
Passes tag deconvolution criteria: No  
Included in protocol analysis: No  
Protocol: N/A  
Filename: Bin6\_plateA2\_A7.fcs  
Split 1: Petrol shading  
Split 2: Green shading  
Split 3: Violet shading

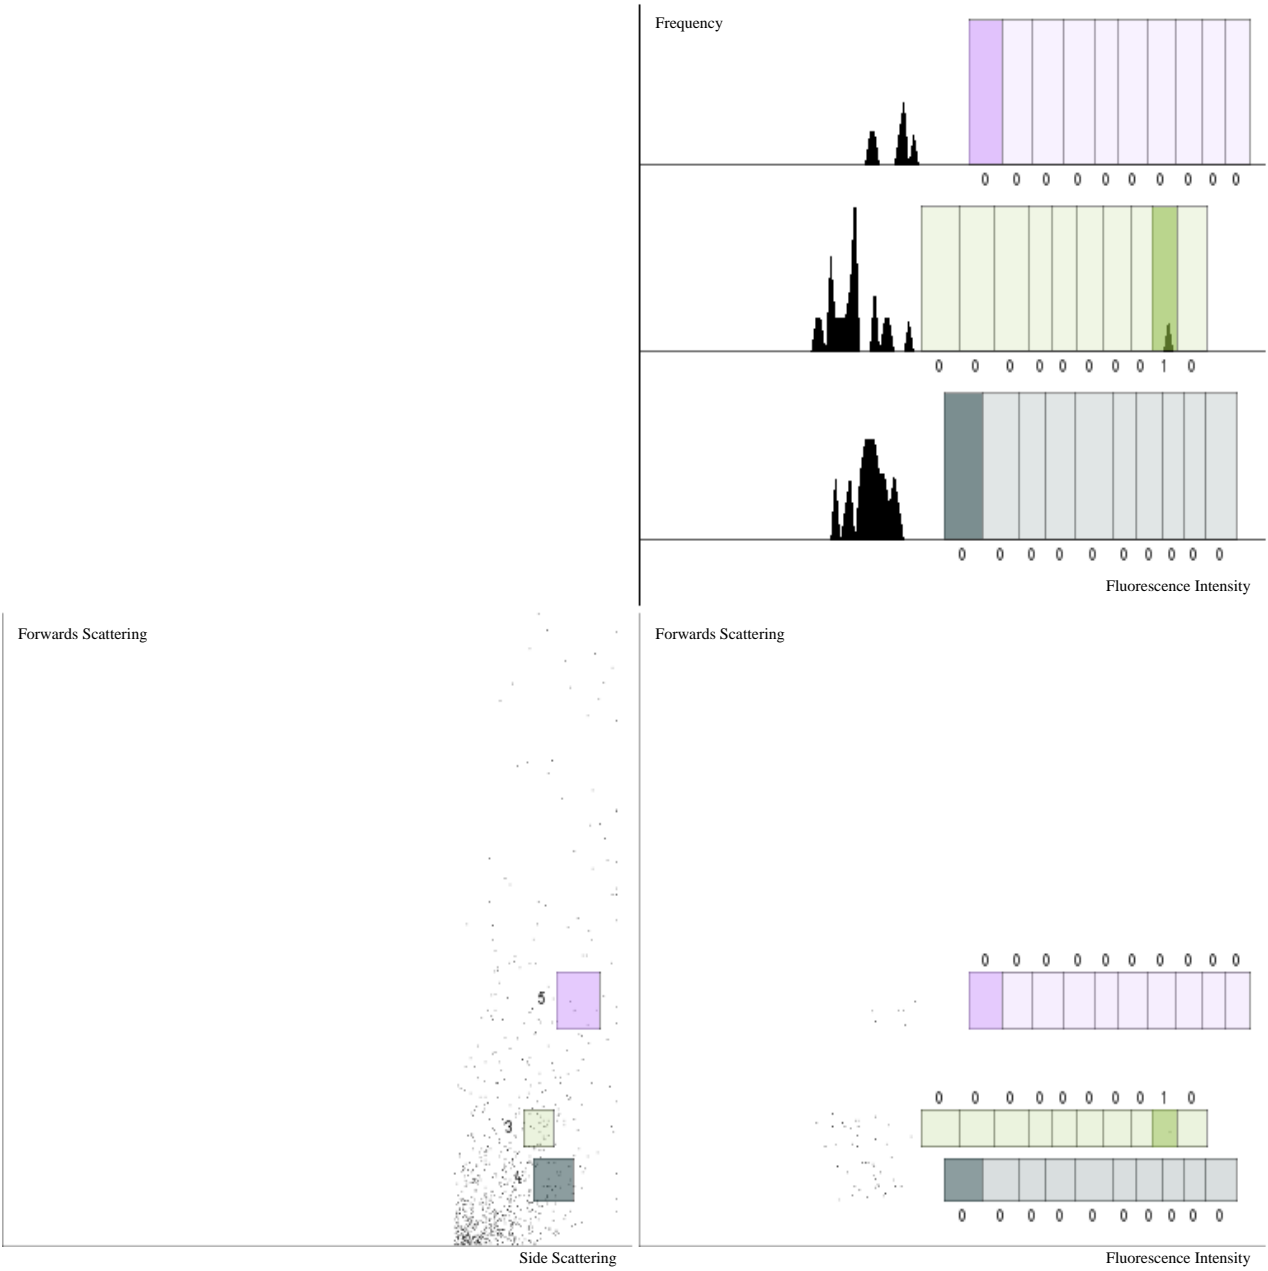

ANNEX 3: TAG DECONVOLUTION - BEAD 386

Passes flow sorting criteria: Yes  
Passes tag deconvolution criteria: Yes  
Included in protocol analysis: Yes  
Protocol: 7, 9, 6, 6  
Filename: Bin6\_plateA2\_A9.fcs  
Split 1: Petrol shading  
Split 2: Green shading  
Split 3: Violet shading

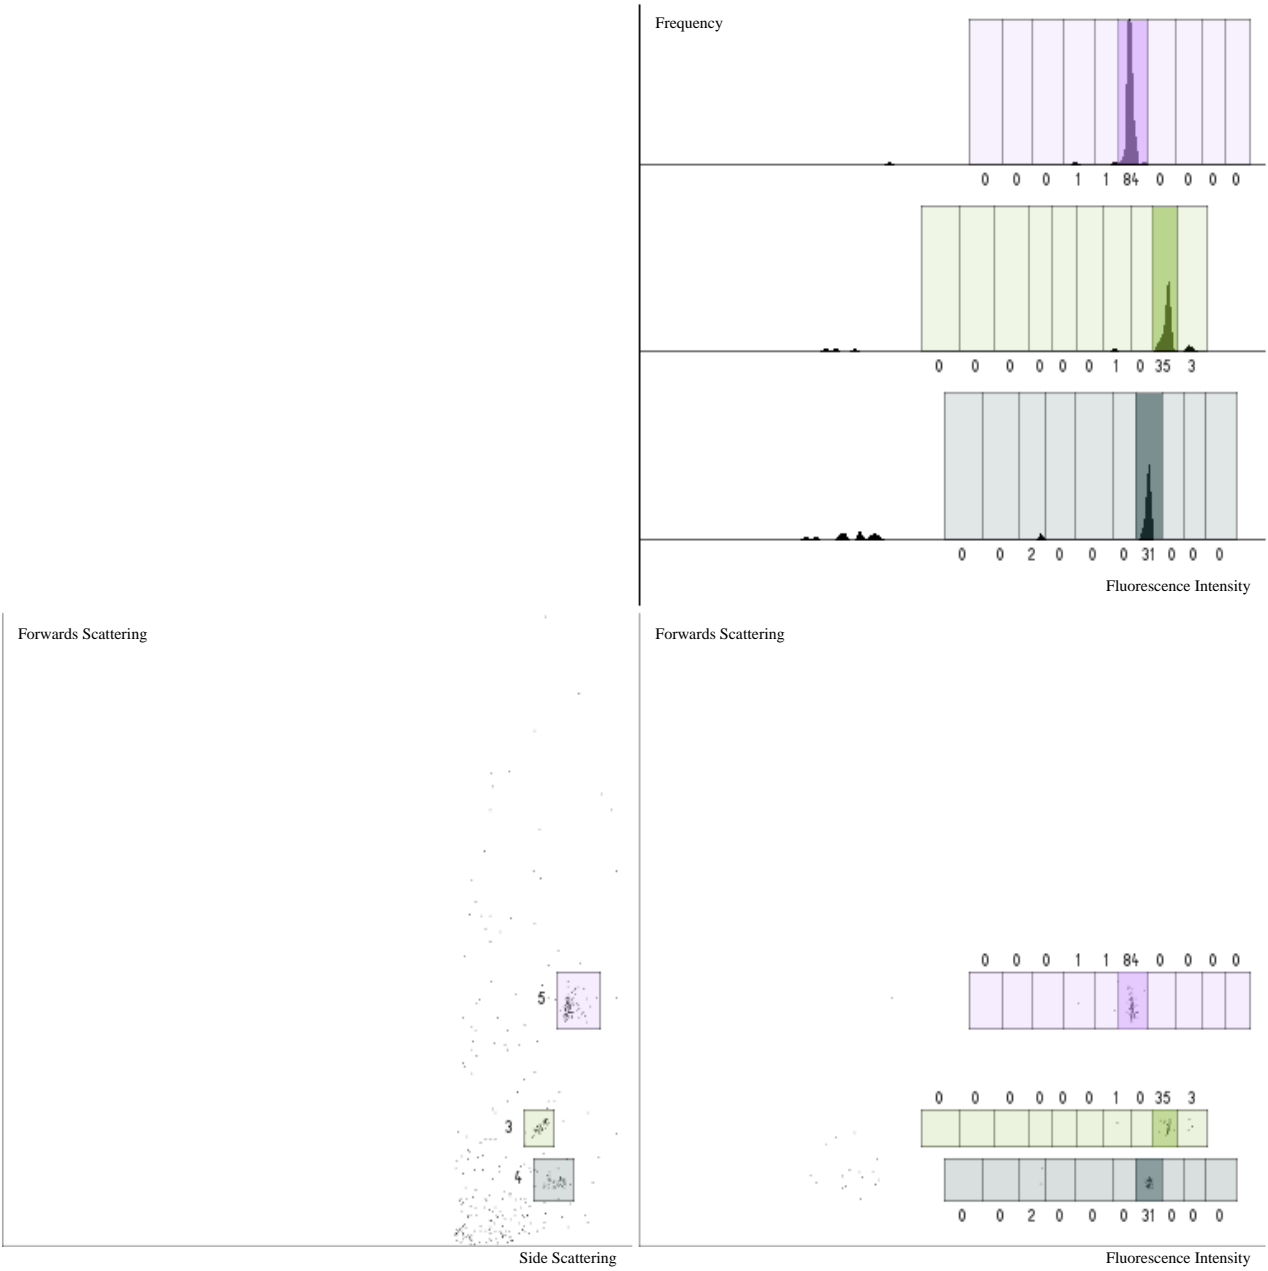

ANNEX 3: TAG DECONVOLUTION - BEAD 387

Passes flow sorting criteria: Yes

Passes tag deconvolution criteria: Yes

Included in protocol analysis: Yes

Protocol: 10, 3, 9, 6

Filename: Bin6\_plateA2\_A10.fcs

Split 1: Petrol shading

Split 2: Green shading

Split 3: Violet shading

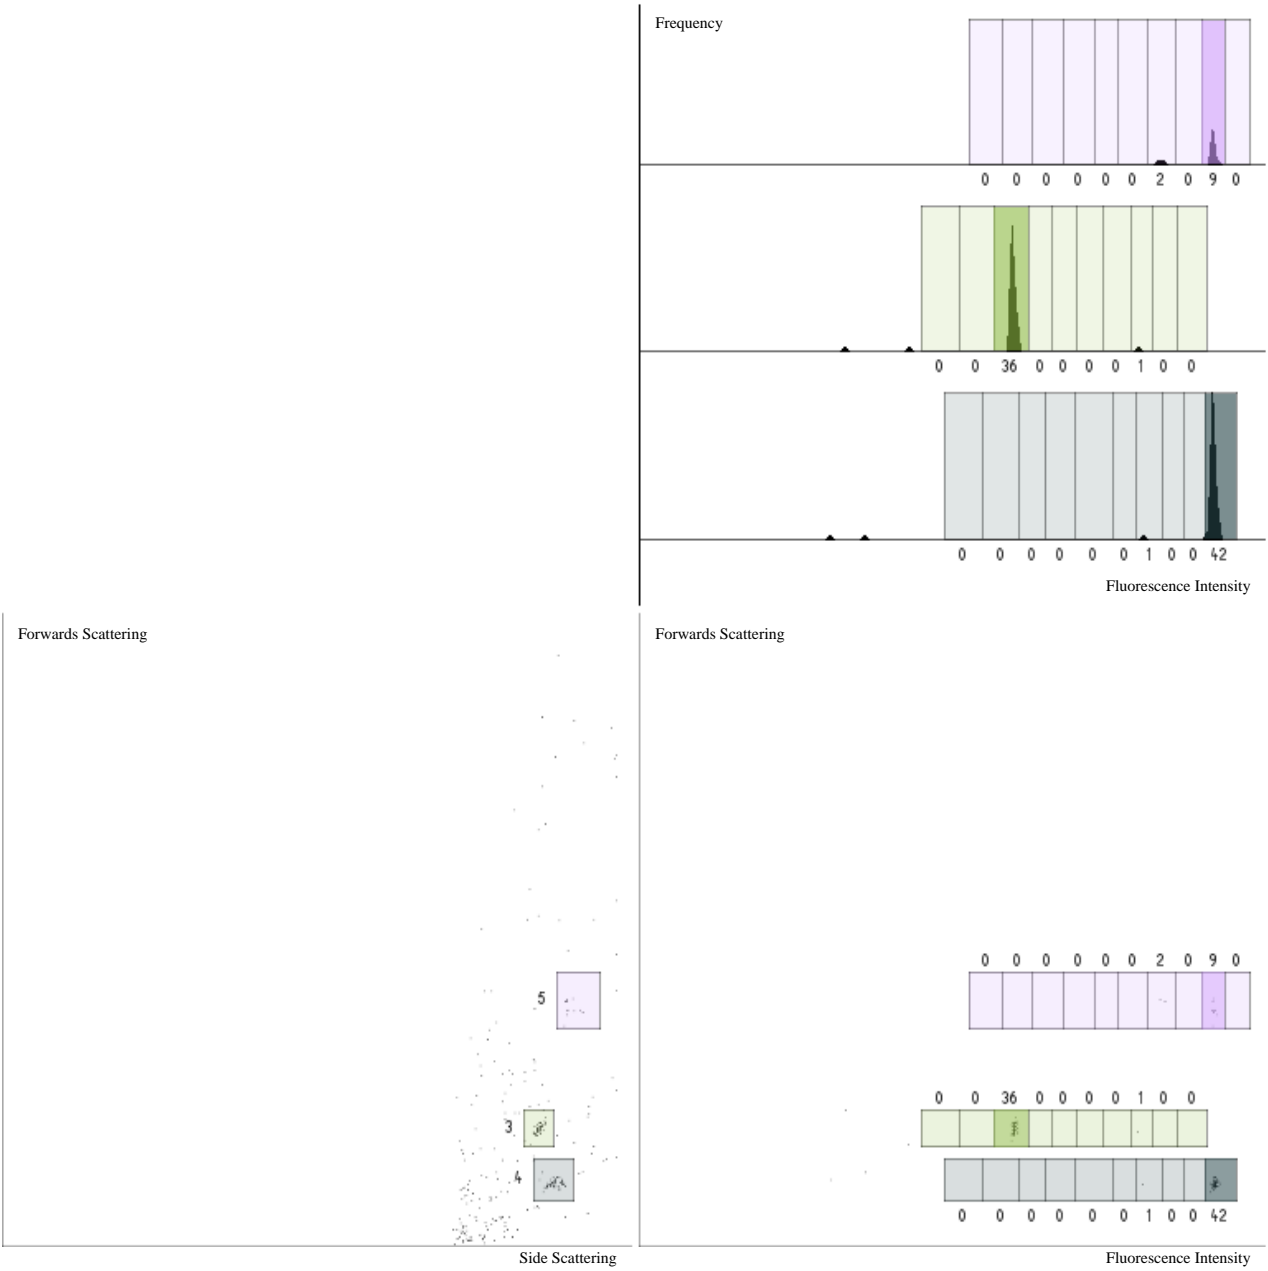

ANNEX 3: TAG DECONVOLUTION - BEAD 388

Passes flow sorting criteria: Yes  
Passes tag deconvolution criteria: Yes  
Included in protocol analysis: Yes  
Protocol: 5, 10, 1, 6  
Filename: Bin6\_plateA2\_A11.fcs  
Split 1: Petrol shading  
Split 2: Green shading  
Split 3: Violet shading

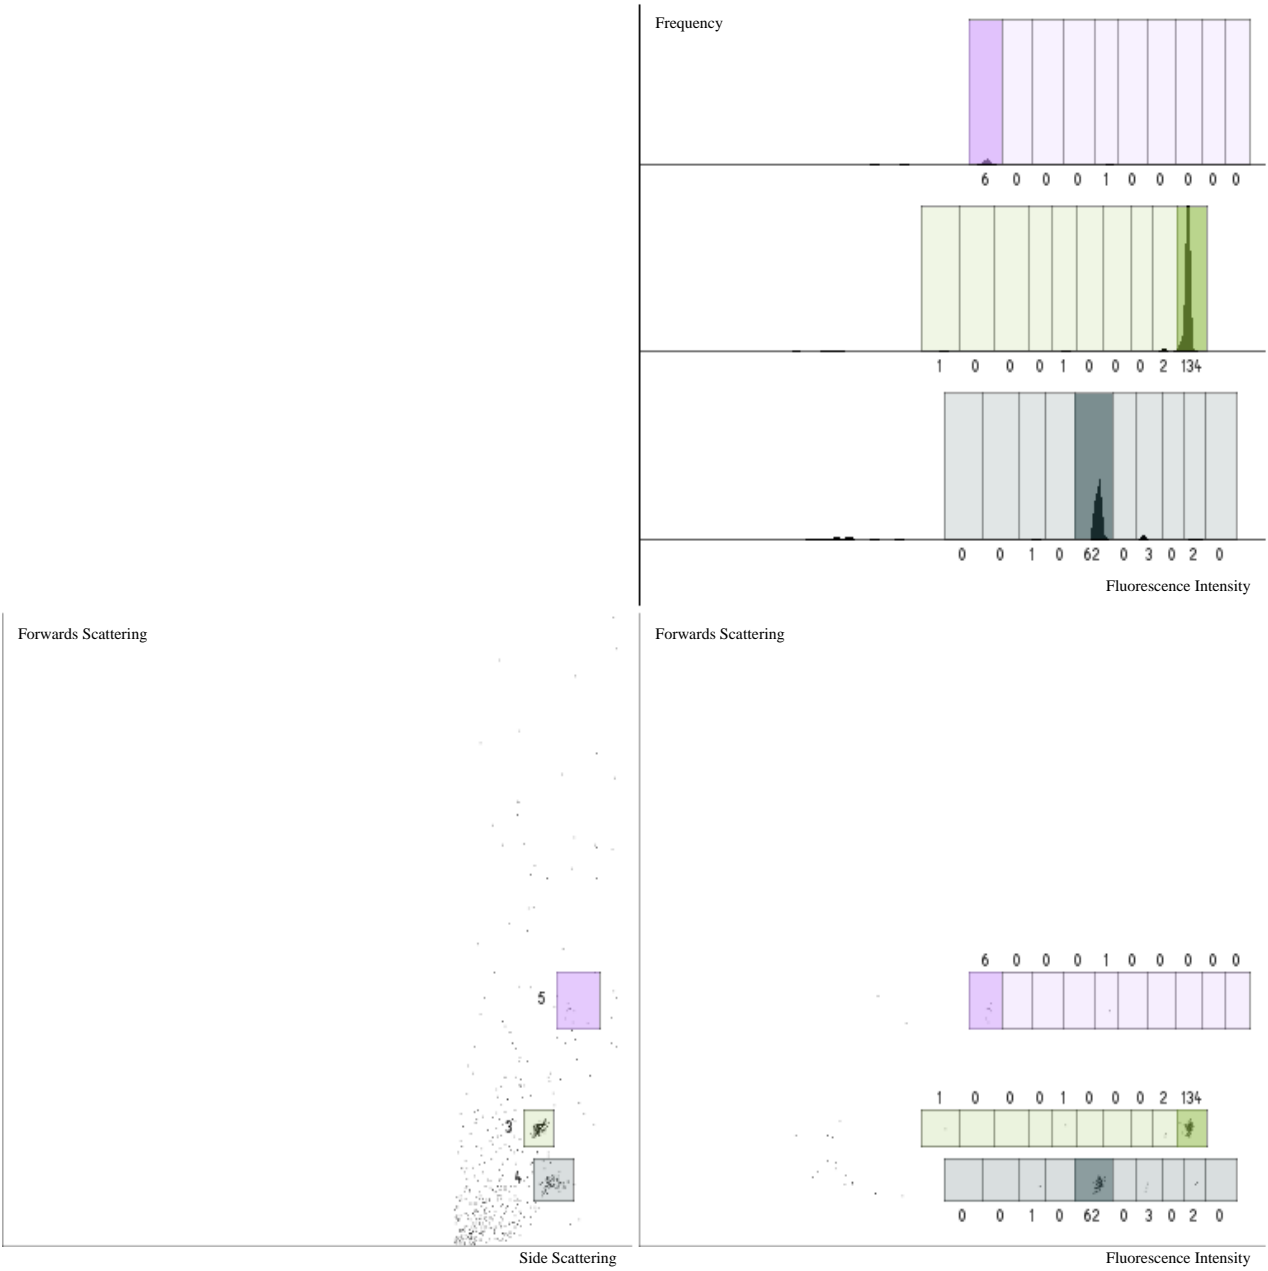

ANNEX 3: TAG DECONVOLUTION - BEAD 389

Passes flow sorting criteria: Yes  
Passes tag deconvolution criteria: Yes  
Included in protocol analysis: Yes  
Protocol: 1, 10, 5, 7  
Filename: Bin7\_plateA0\_C1.fcs  
Split 1: Petrol shading  
Split 2: Green shading  
Split 3: Violet shading

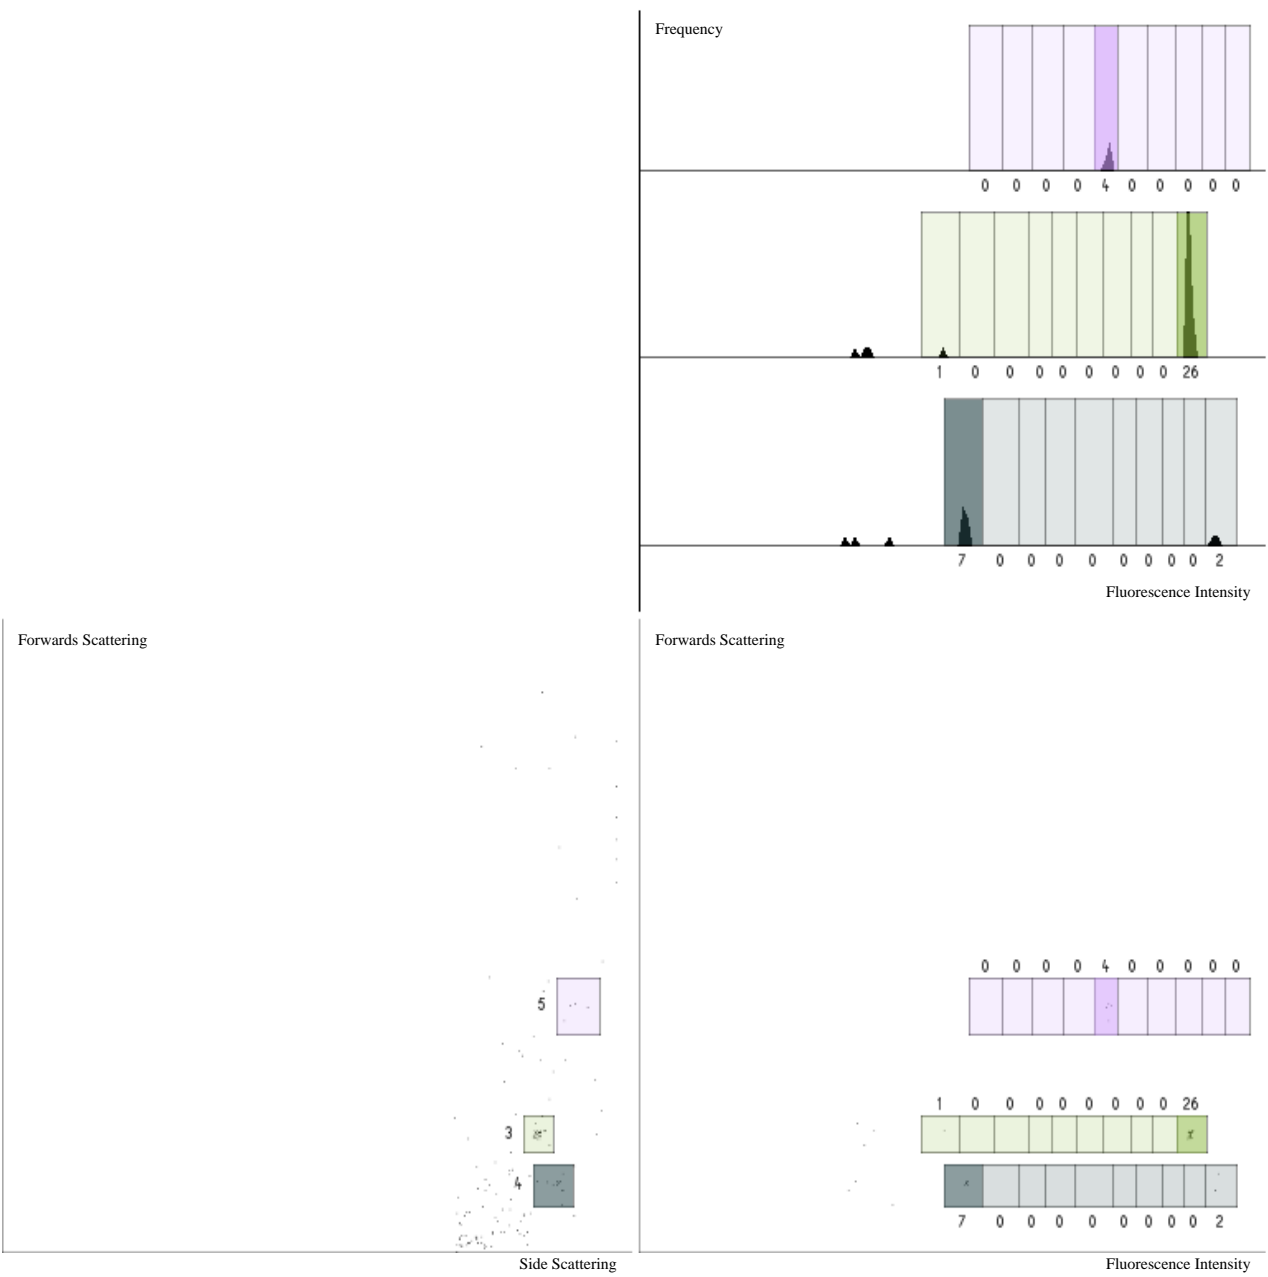

ANNEX 3: TAG DECONVOLUTION - BEAD 390

Passes flow sorting criteria: Yes  
Passes tag deconvolution criteria: Yes  
Included in protocol analysis: Yes  
Protocol: 2, 3, 2, 7  
Filename: Bin7\_plateA0\_C2.fcs  
Split 1: Petrol shading  
Split 2: Green shading  
Split 3: Violet shading

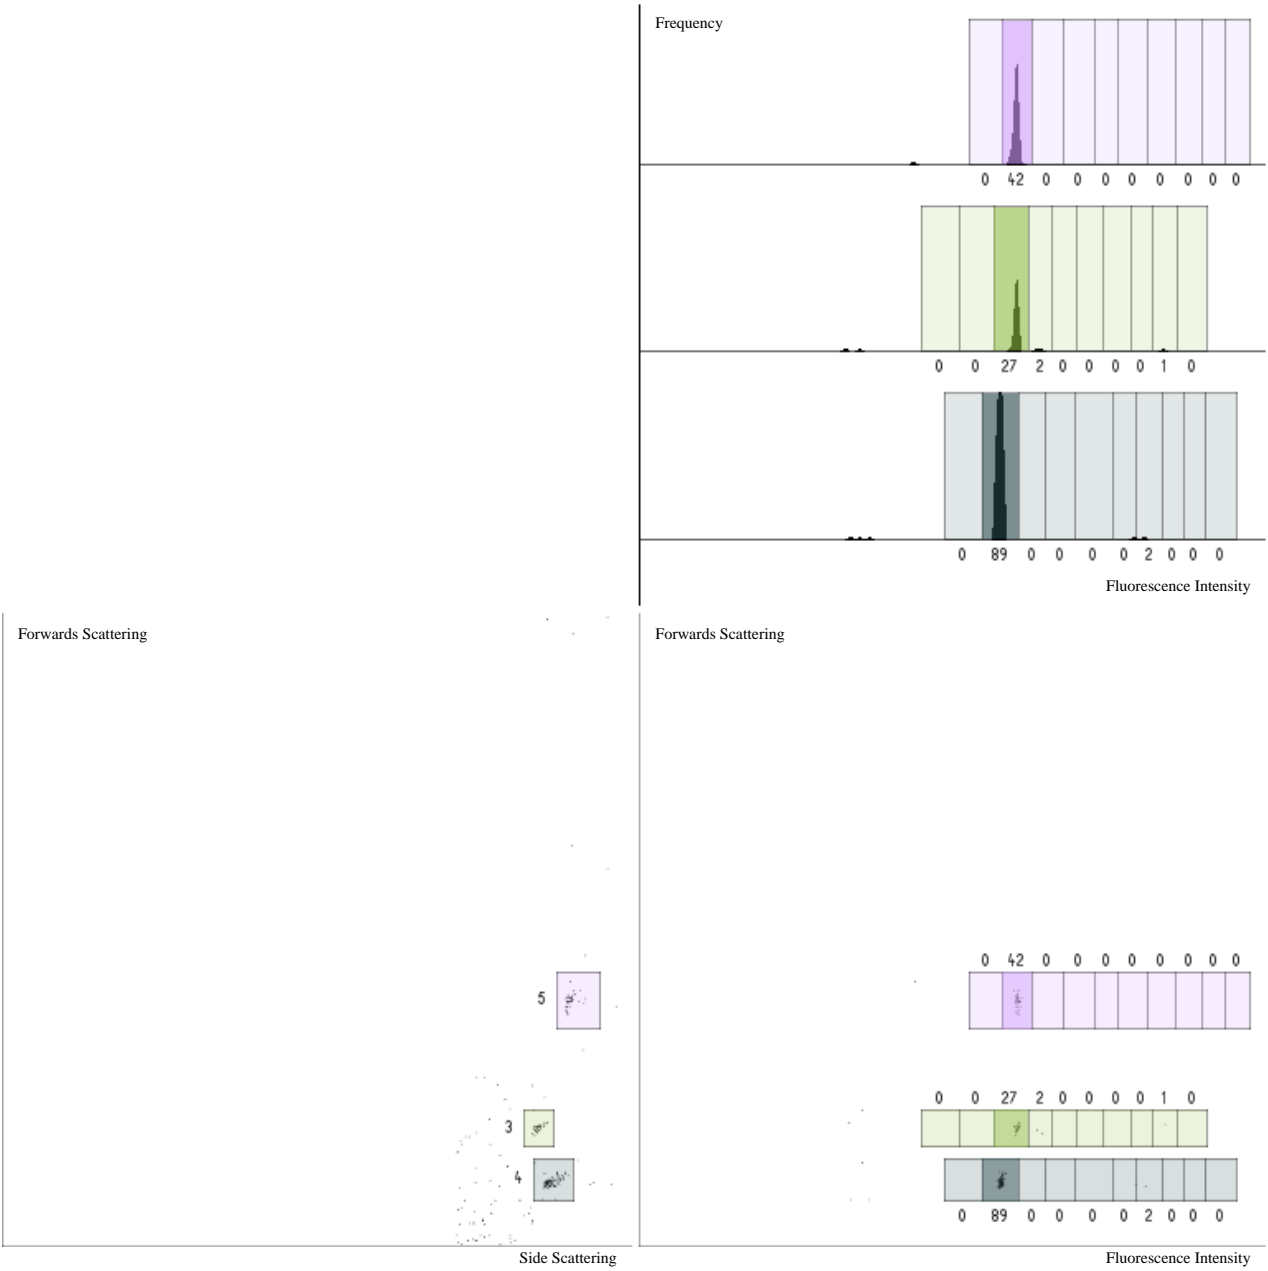



ANNEX 3: TAG DECONVOLUTION - BEAD 391

Passes flow sorting criteria: Yes  
Passes tag deconvolution criteria: Yes  
Included in protocol analysis: Yes  
Protocol: 10, 9, 4, 8  
Filename: Bin8\_plateA0\_G12.fcs  
Split 1: Petrol shading  
Split 2: Green shading  
Split 3: Violet shading

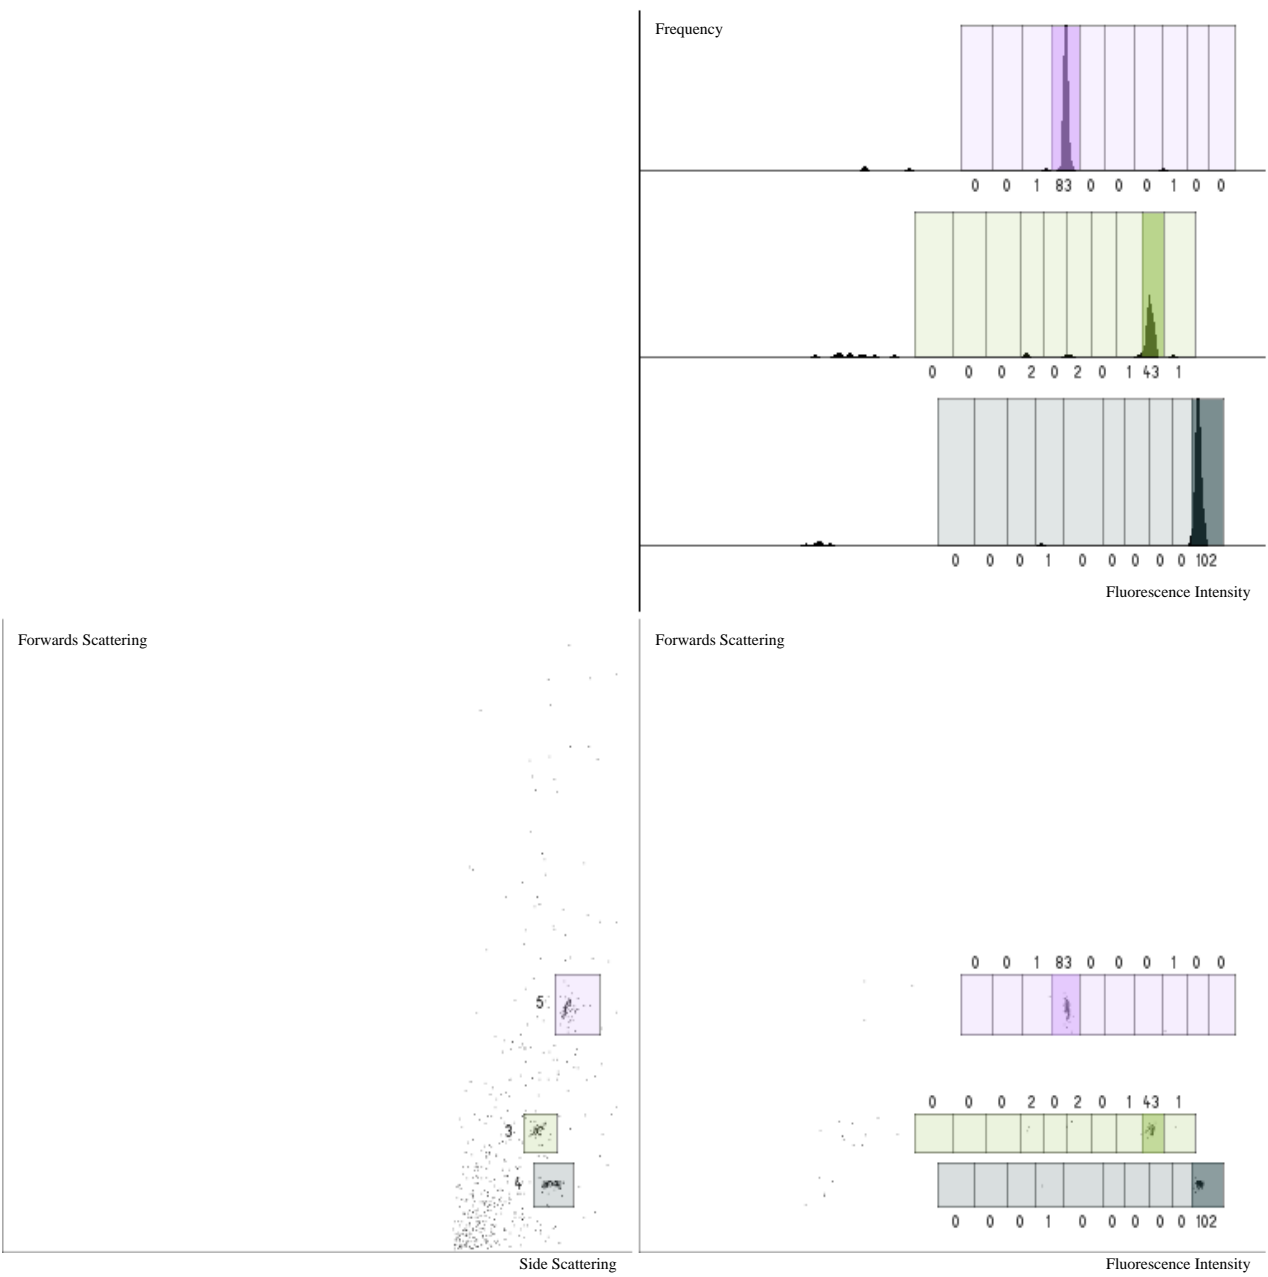

ANNEX 3: TAG DECONVOLUTION - BEAD 392

Passes flow sorting criteria: Yes  
Passes tag deconvolution criteria: No  
Included in protocol analysis: No  
Protocol: N/A  
Filename: Bin7\_plateA0\_C4.fcs  
Split 1: Petrol shading  
Split 2: Green shading  
Split 3: Violet shading

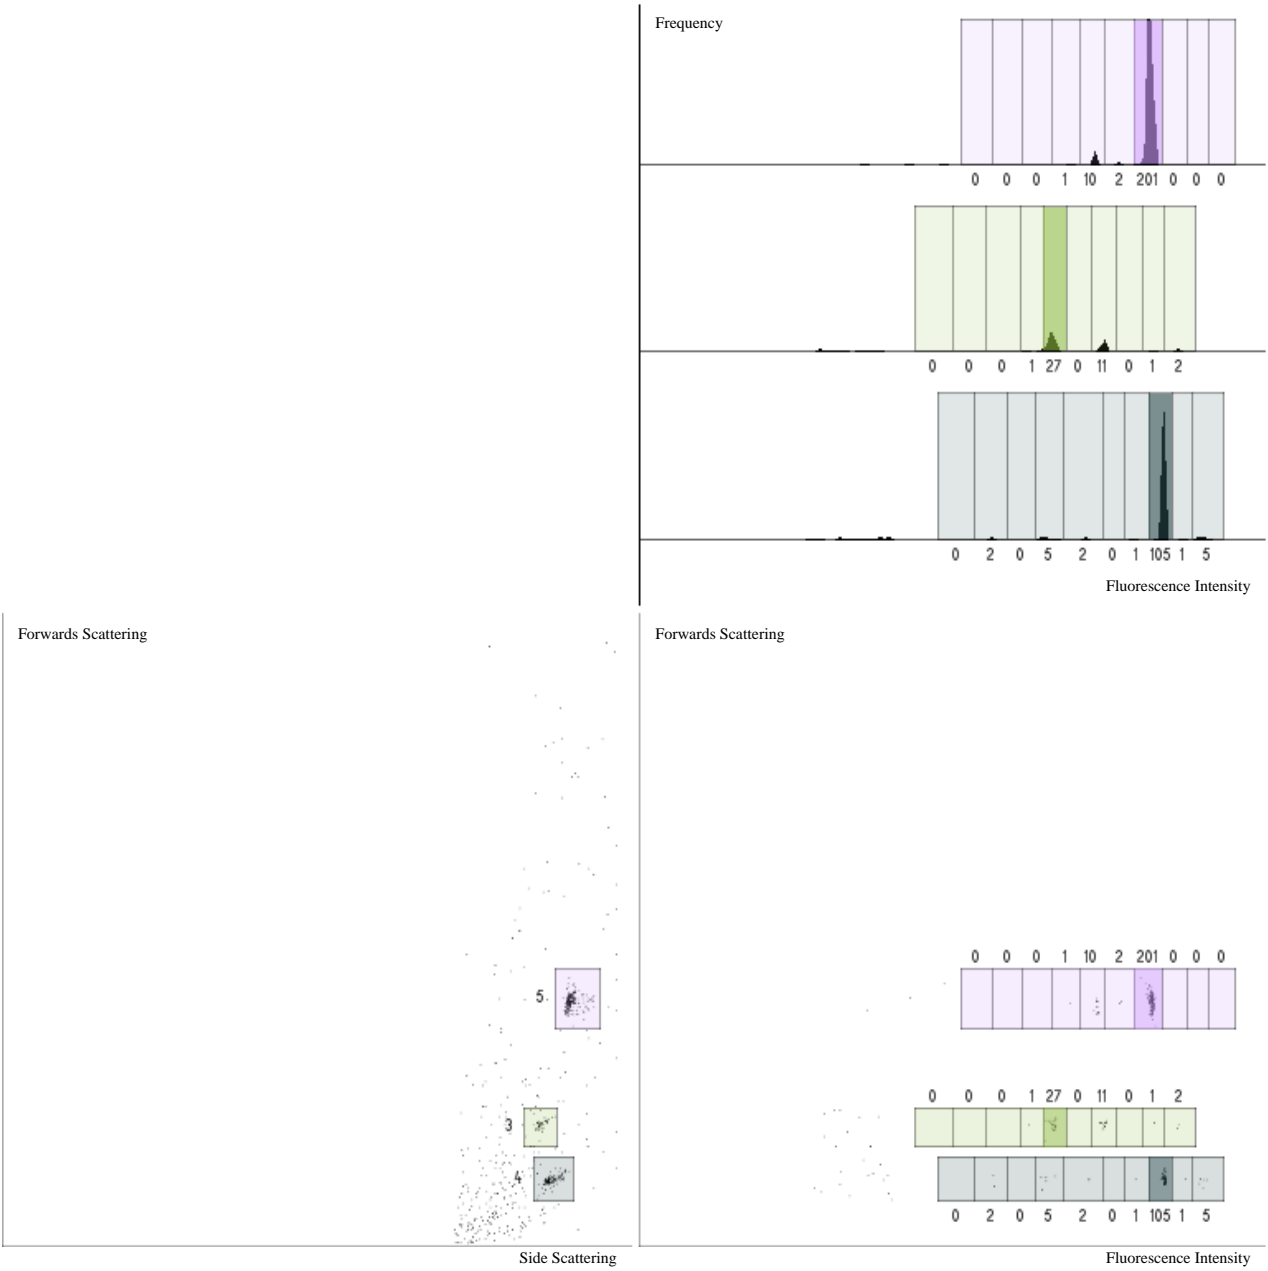

ANNEX 3: TAG DECONVOLUTION - BEAD 393

Passes flow sorting criteria: Yes  
Passes tag deconvolution criteria: Yes  
Included in protocol analysis: Yes  
Protocol: 7, 6, 1, 7  
Filename: Bin7\_plateA0\_C5.fcs  
Split 1: Petrol shading  
Split 2: Green shading  
Split 3: Violet shading

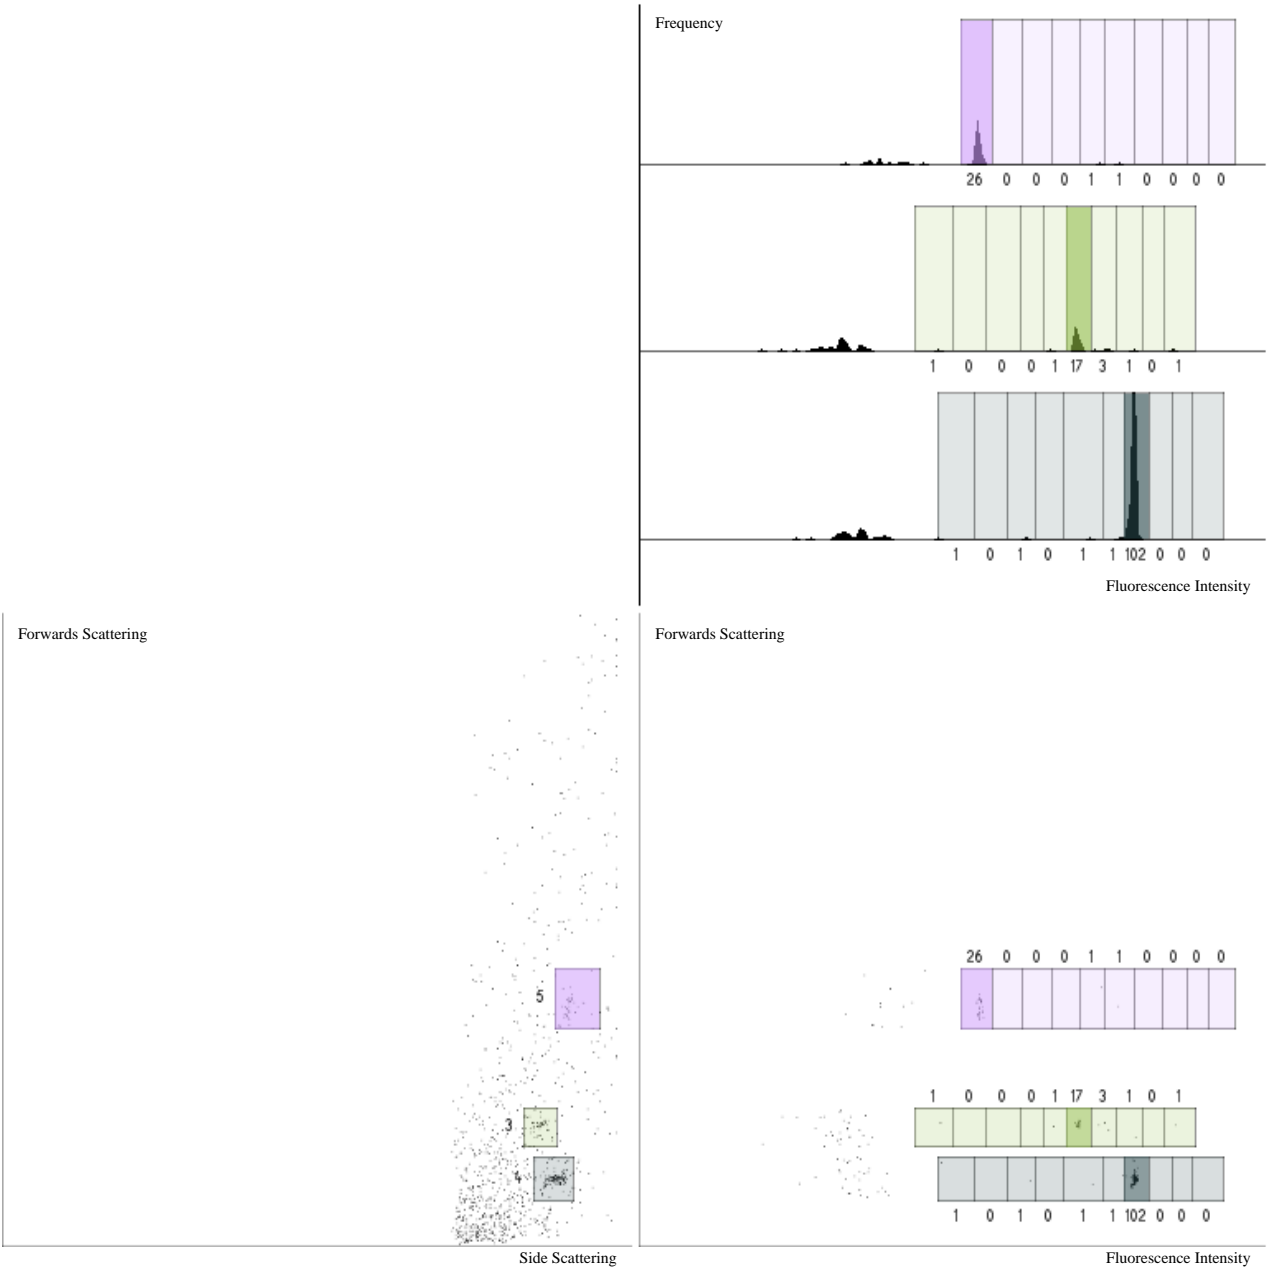

ANNEX 3: TAG DECONVOLUTION - BEAD 394

Passes flow sorting criteria: Yes  
Passes tag deconvolution criteria: Yes  
Included in protocol analysis: Yes  
Protocol: 8, 10, 6, 7  
Filename: Bin7\_plateA0\_C7.fcs  
Split 1: Petrol shading  
Split 2: Green shading  
Split 3: Violet shading

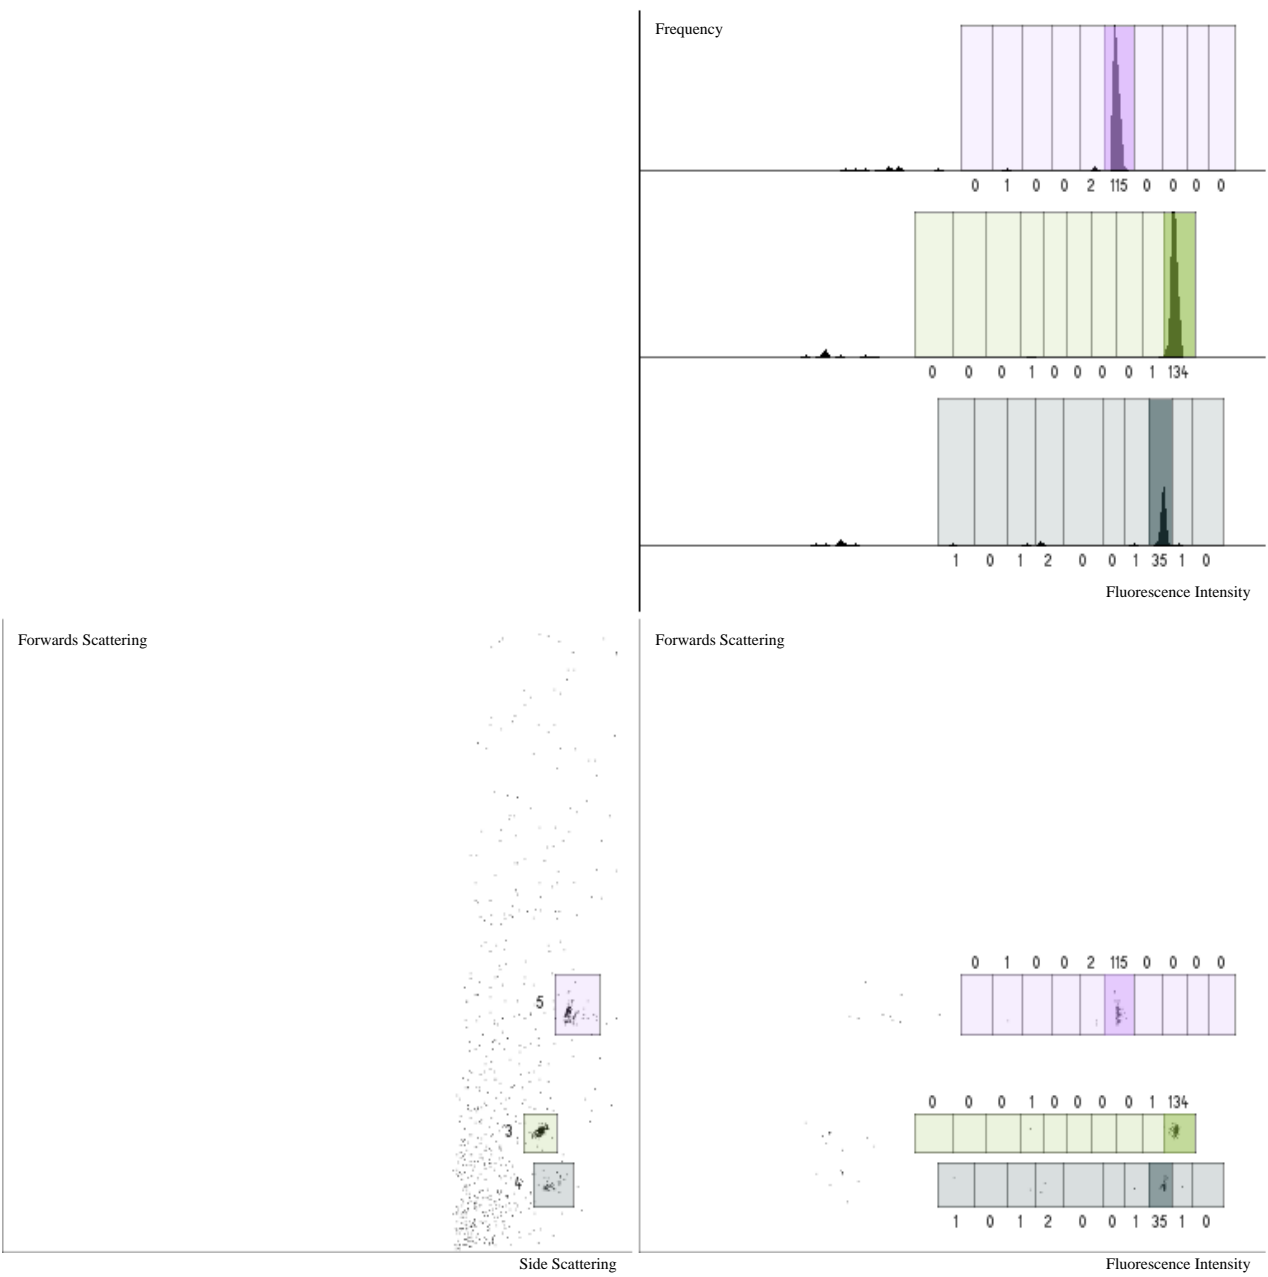

ANNEX 3: TAG DECONVOLUTION - BEAD 395

Passes flow sorting criteria: Yes  
Passes tag deconvolution criteria: No  
Included in protocol analysis: No  
Protocol: N/A  
Filename: Bin7\_plateA0\_C8.fcs  
Split 1: Petrol shading  
Split 2: Green shading  
Split 3: Violet shading

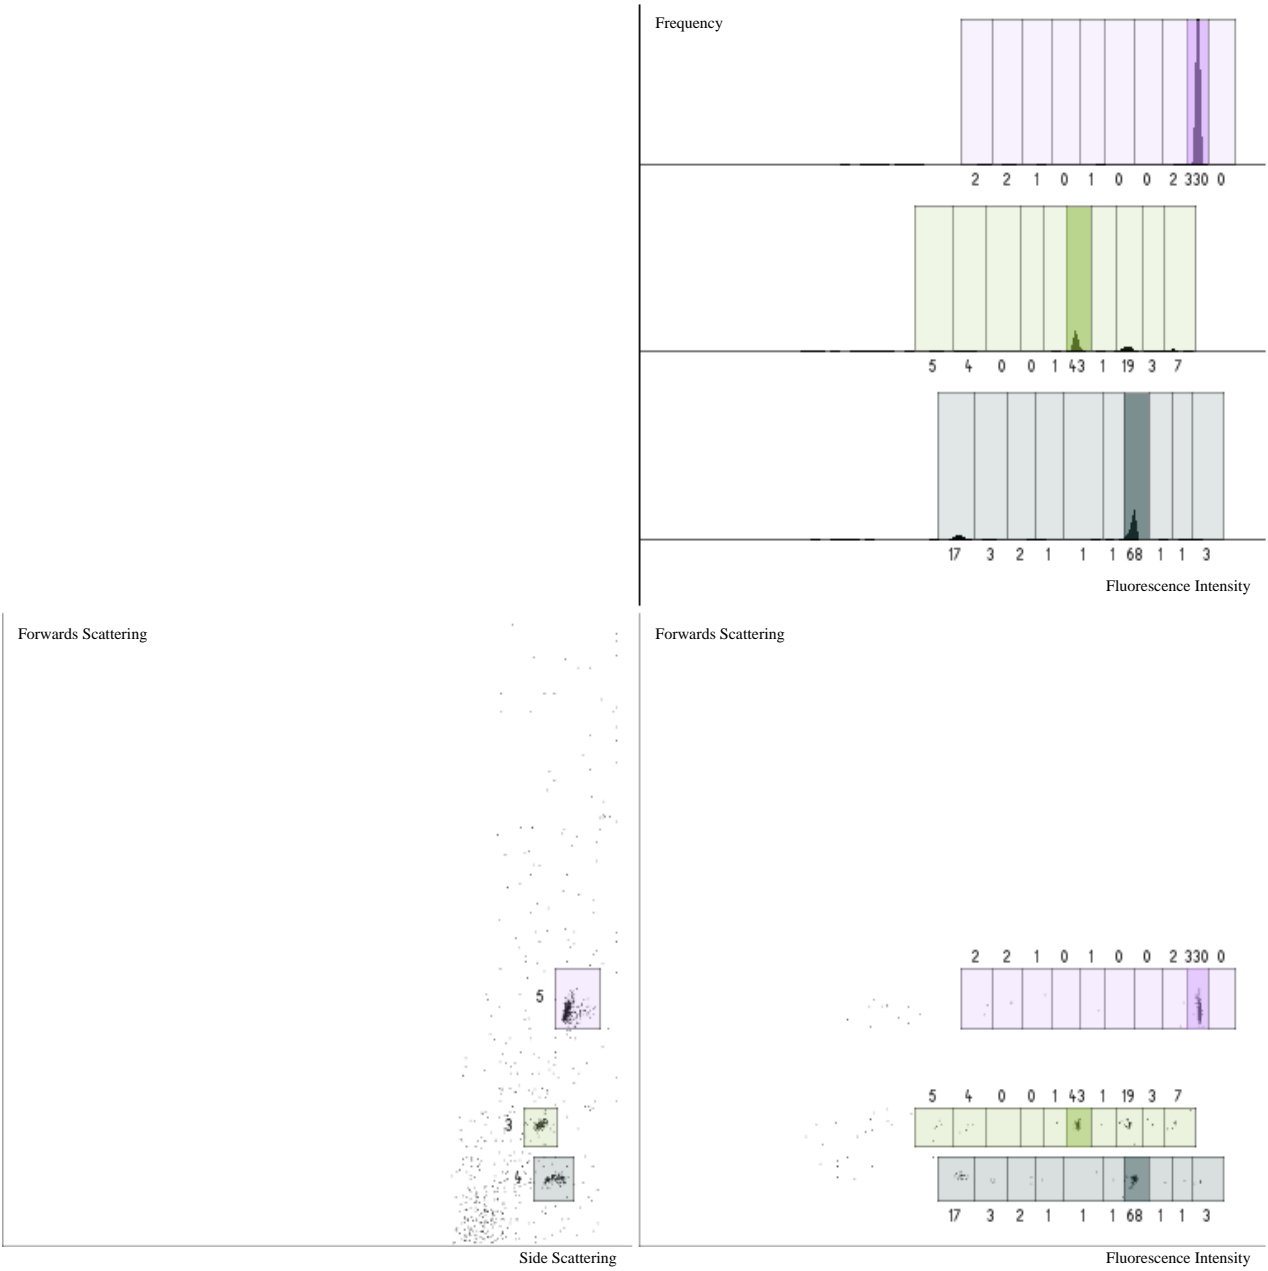

ANNEX 3: TAG DECONVOLUTION - BEAD 396

Passes flow sorting criteria: Yes  
Passes tag deconvolution criteria: Yes  
Included in protocol analysis: Yes  
Protocol: 4, 1, 3, 7  
Filename: Bin7\_plateA0\_C9.fcs  
Split 1: Petrol shading  
Split 2: Green shading  
Split 3: Violet shading

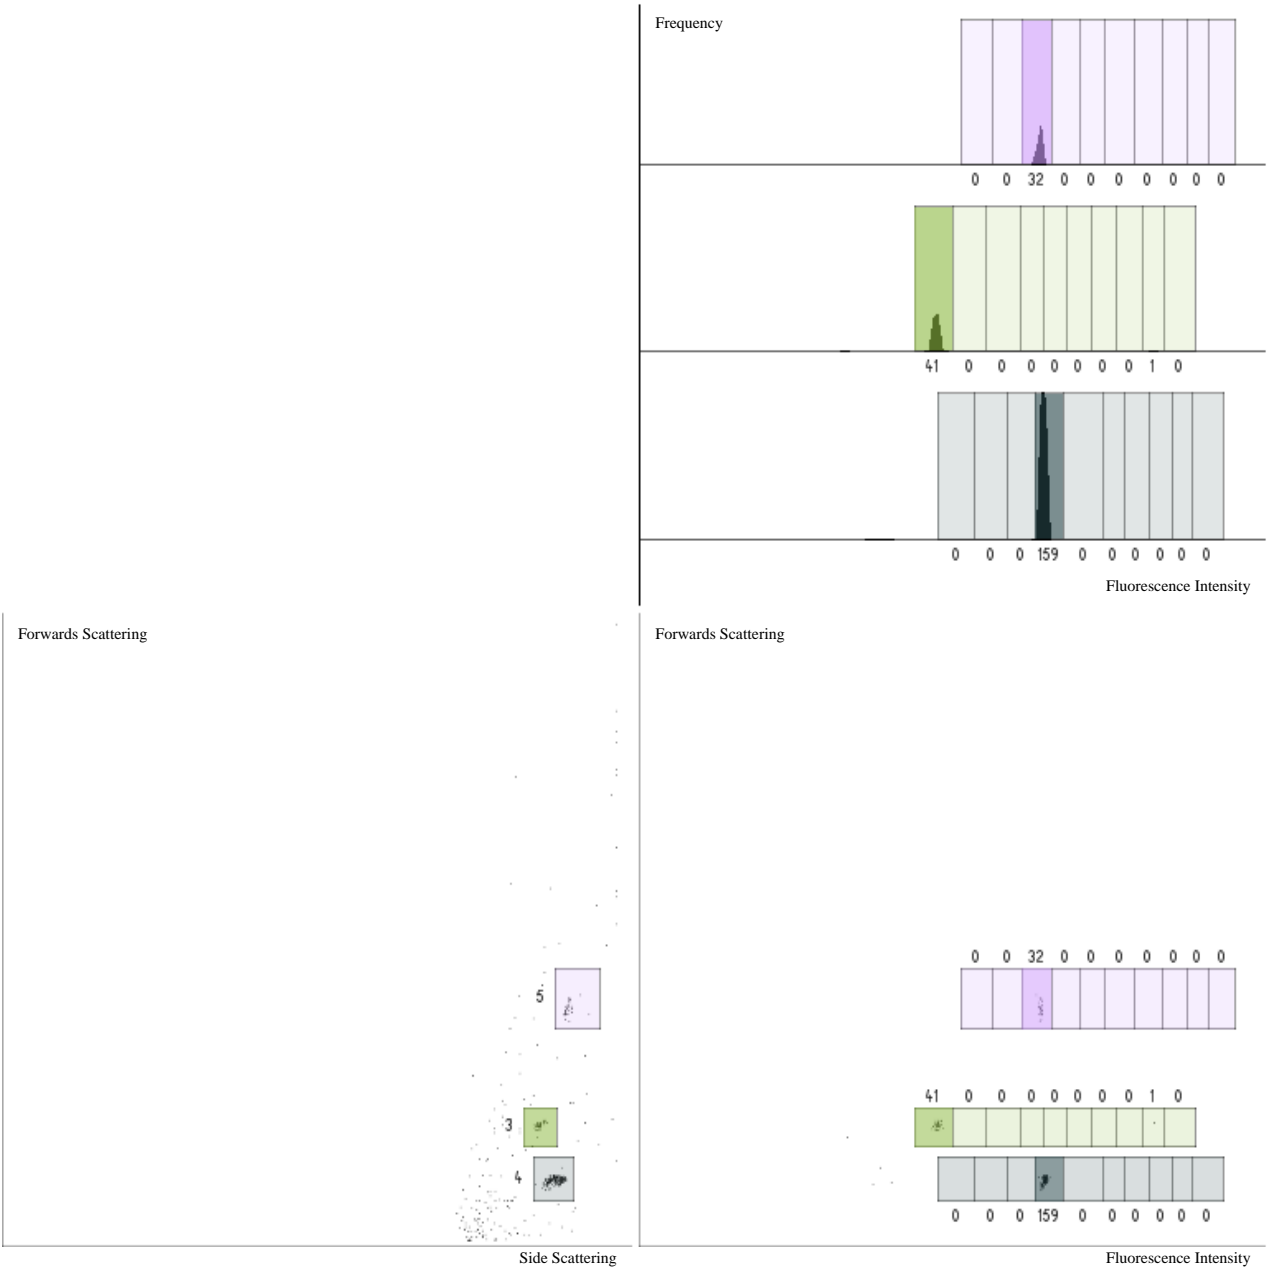

ANNEX 3: TAG DECONVOLUTION - BEAD 397

Passes flow sorting criteria: Yes  
Passes tag deconvolution criteria: Yes  
Included in protocol analysis: Yes  
Protocol: 3, 2, 3, 7  
Filename: Bin7\_plateA0\_C11.fcs  
Split 1: Petrol shading  
Split 2: Green shading  
Split 3: Violet shading

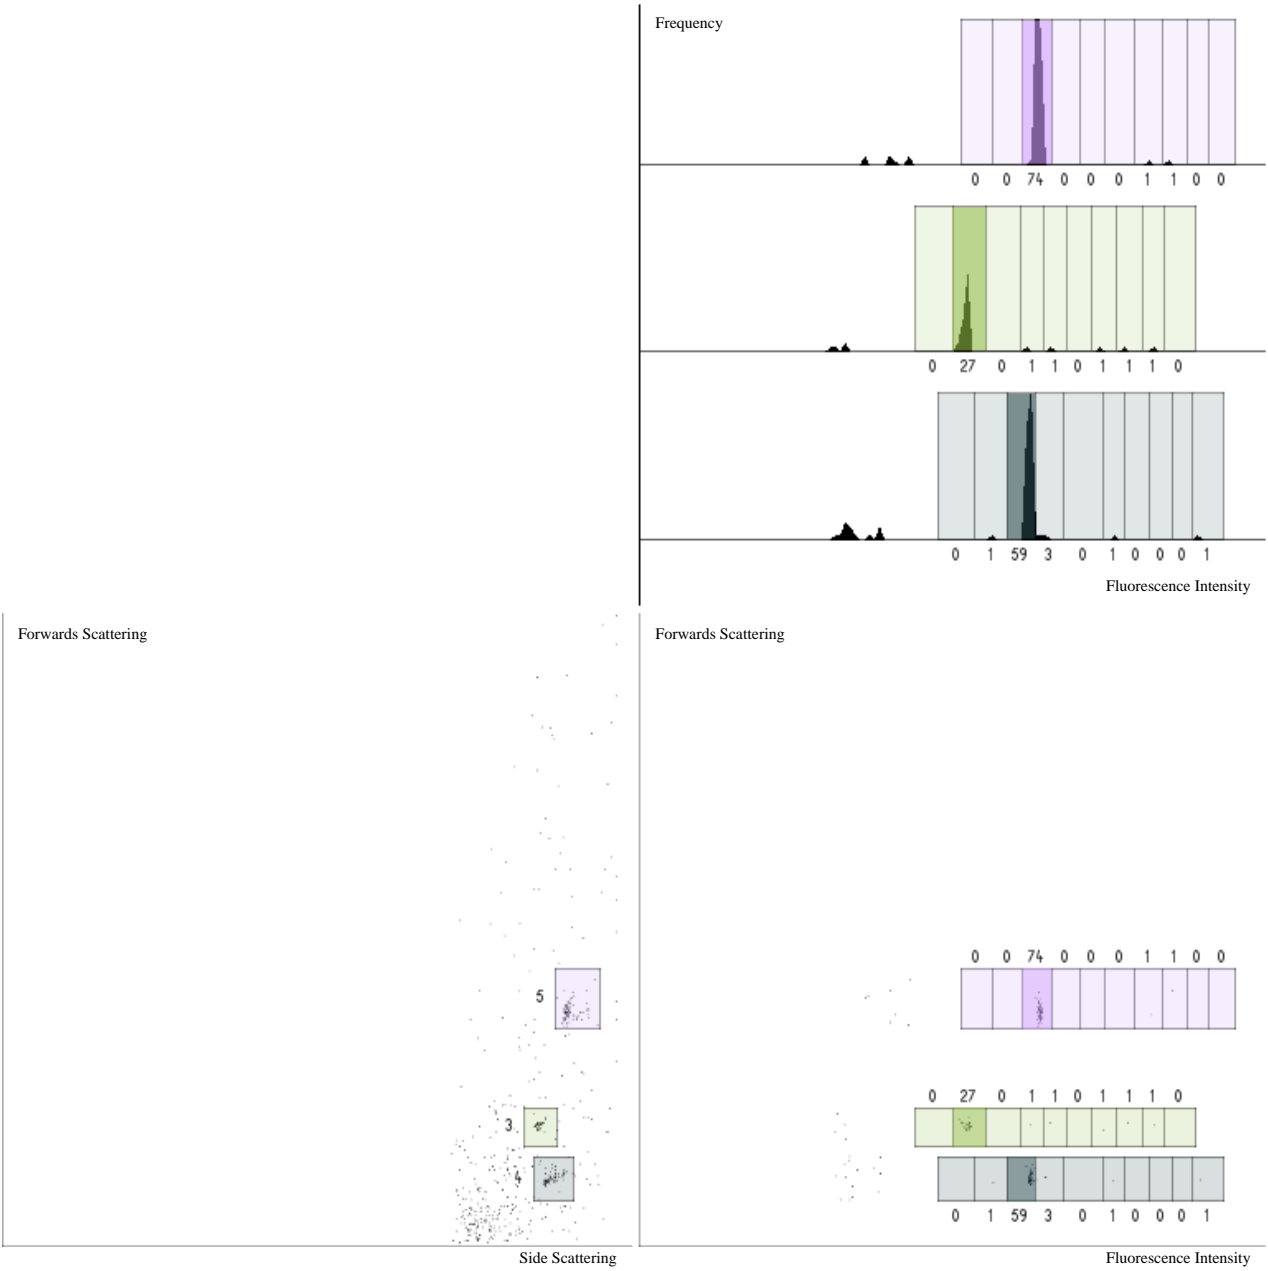

ANNEX 3: TAG DECONVOLUTION - BEAD 398

Passes flow sorting criteria: Yes  
Passes tag deconvolution criteria: Yes  
Included in protocol analysis: Yes  
Protocol: 6, 6, 6, 7  
Filename: Bin7\_plateA0\_C12.fcs  
Split 1: Petrol shading  
Split 2: Green shading  
Split 3: Violet shading

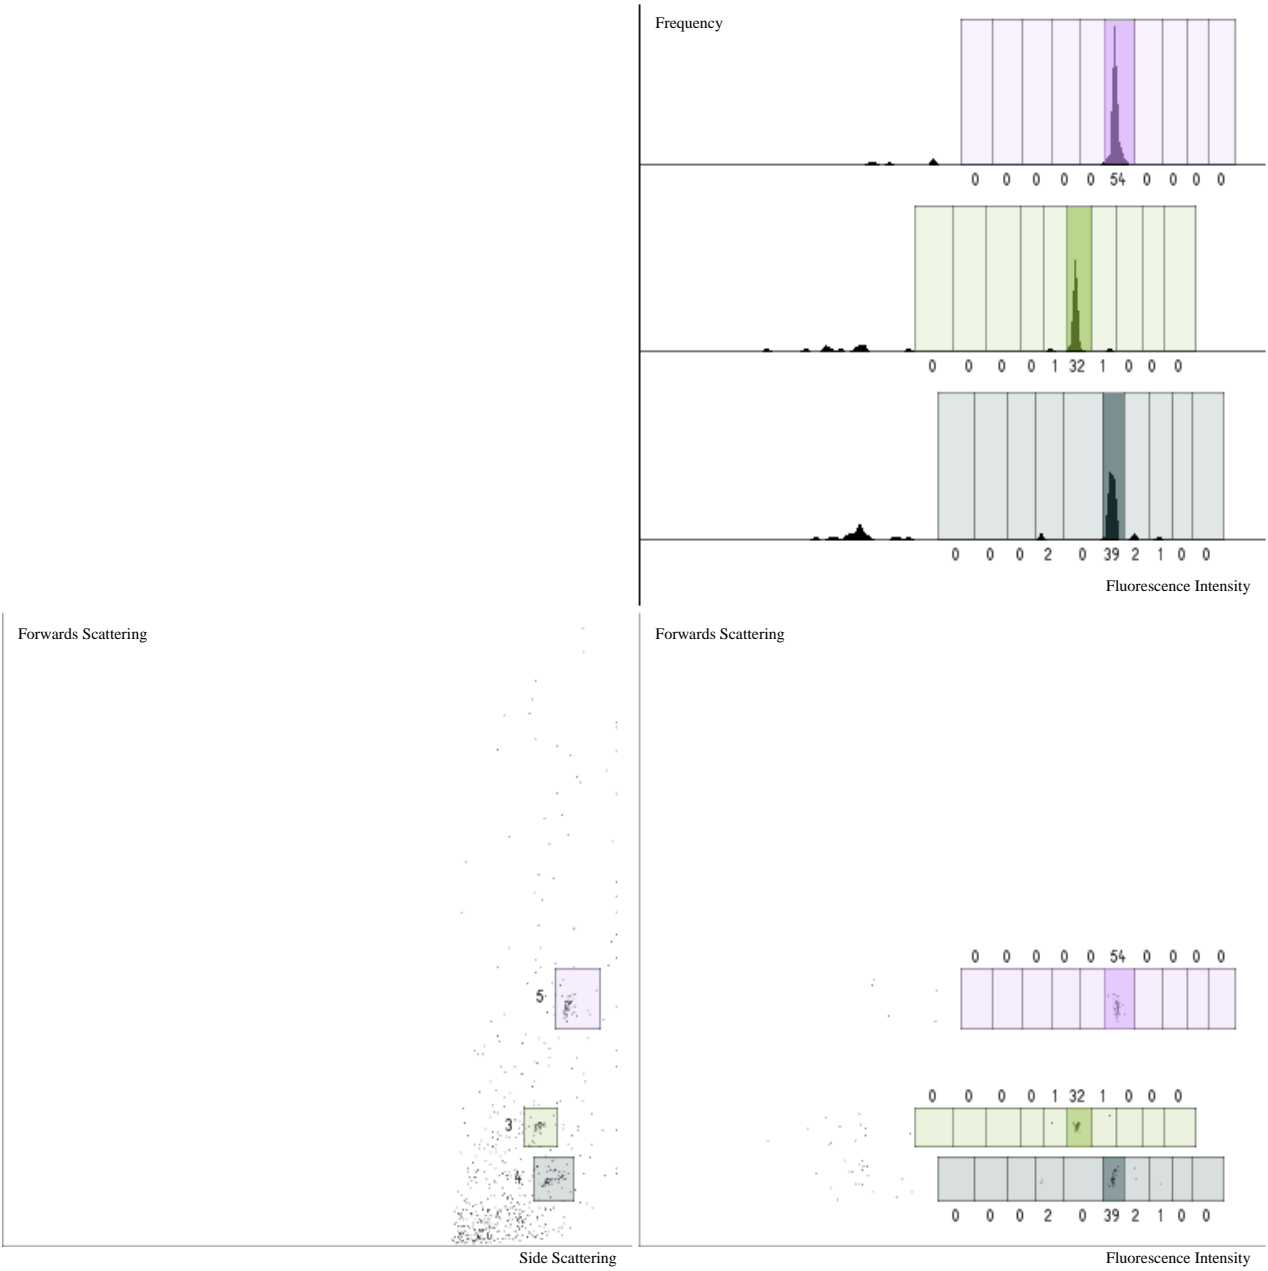



ANNEX 3: TAG DECONVOLUTION - BEAD 399

Passes flow sorting criteria: Yes  
Passes tag deconvolution criteria: Yes  
Included in protocol analysis: Yes  
Protocol: 5, 10, 1, 7  
Filename: Bin7\_plateA0\_D5.fcs  
Split 1: Petrol shading  
Split 2: Green shading  
Split 3: Violet shading

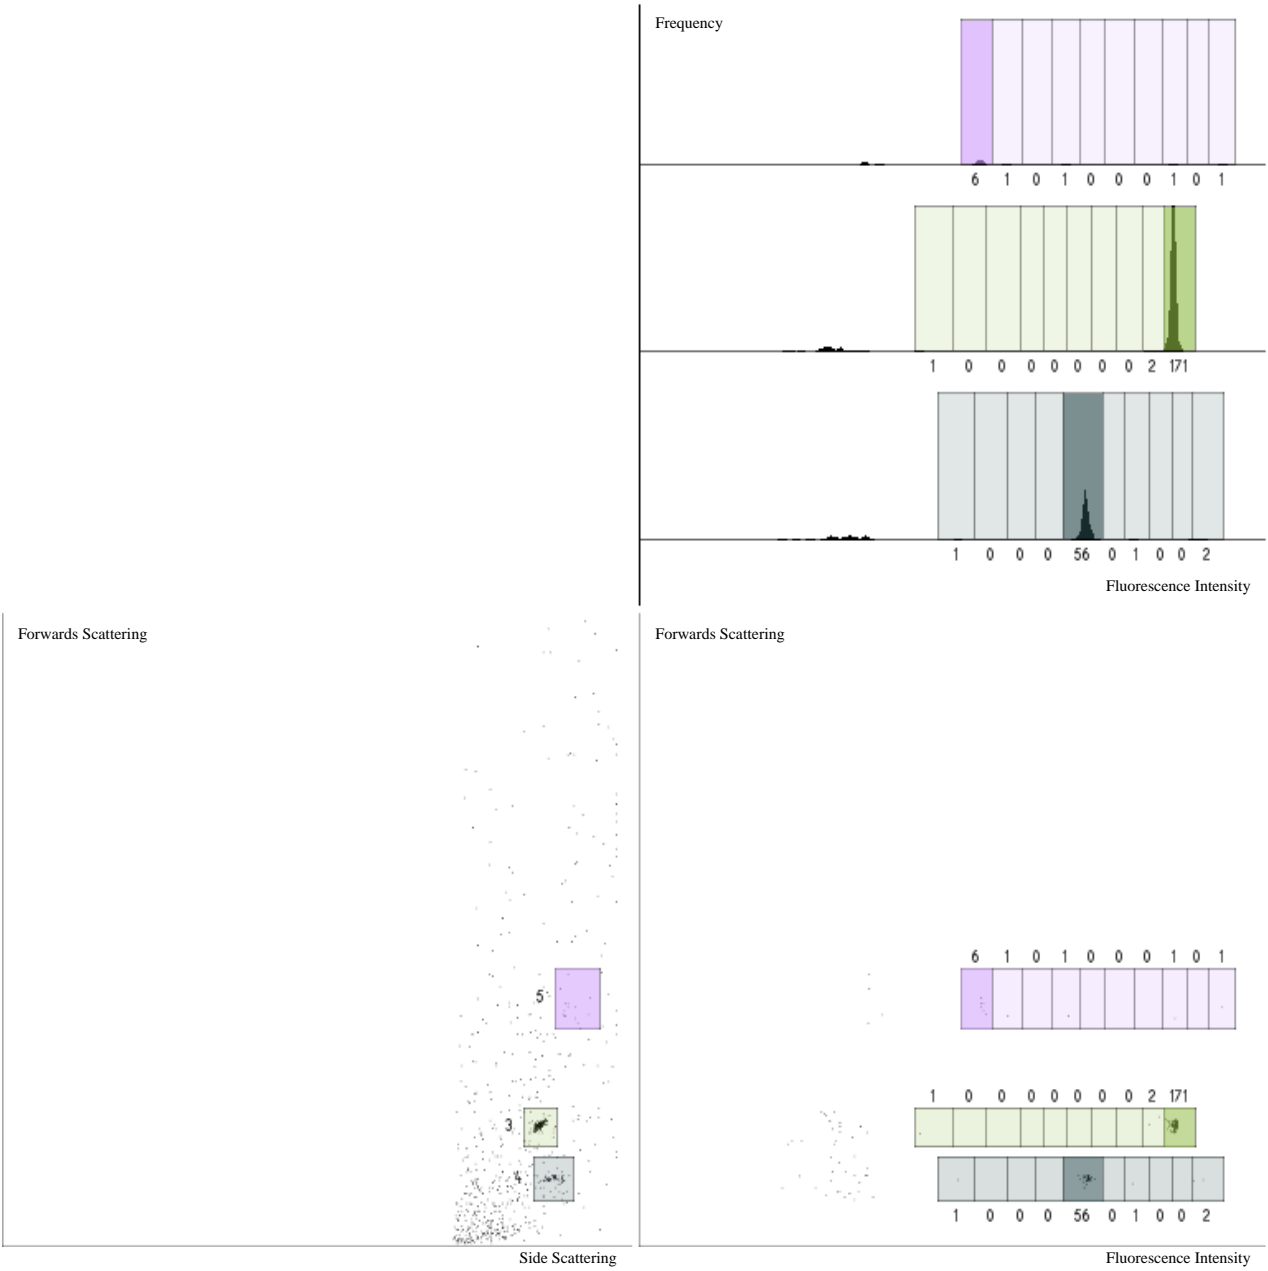

ANNEX 3: TAG DECONVOLUTION - BEAD 400

Passes flow sorting criteria: Yes  
Passes tag deconvolution criteria: Yes  
Included in protocol analysis: Yes  
Protocol: 8, 8, 4, 7  
Filename: Bin7\_plateA0\_D6.fcs  
Split 1: Petrol shading  
Split 2: Green shading  
Split 3: Violet shading

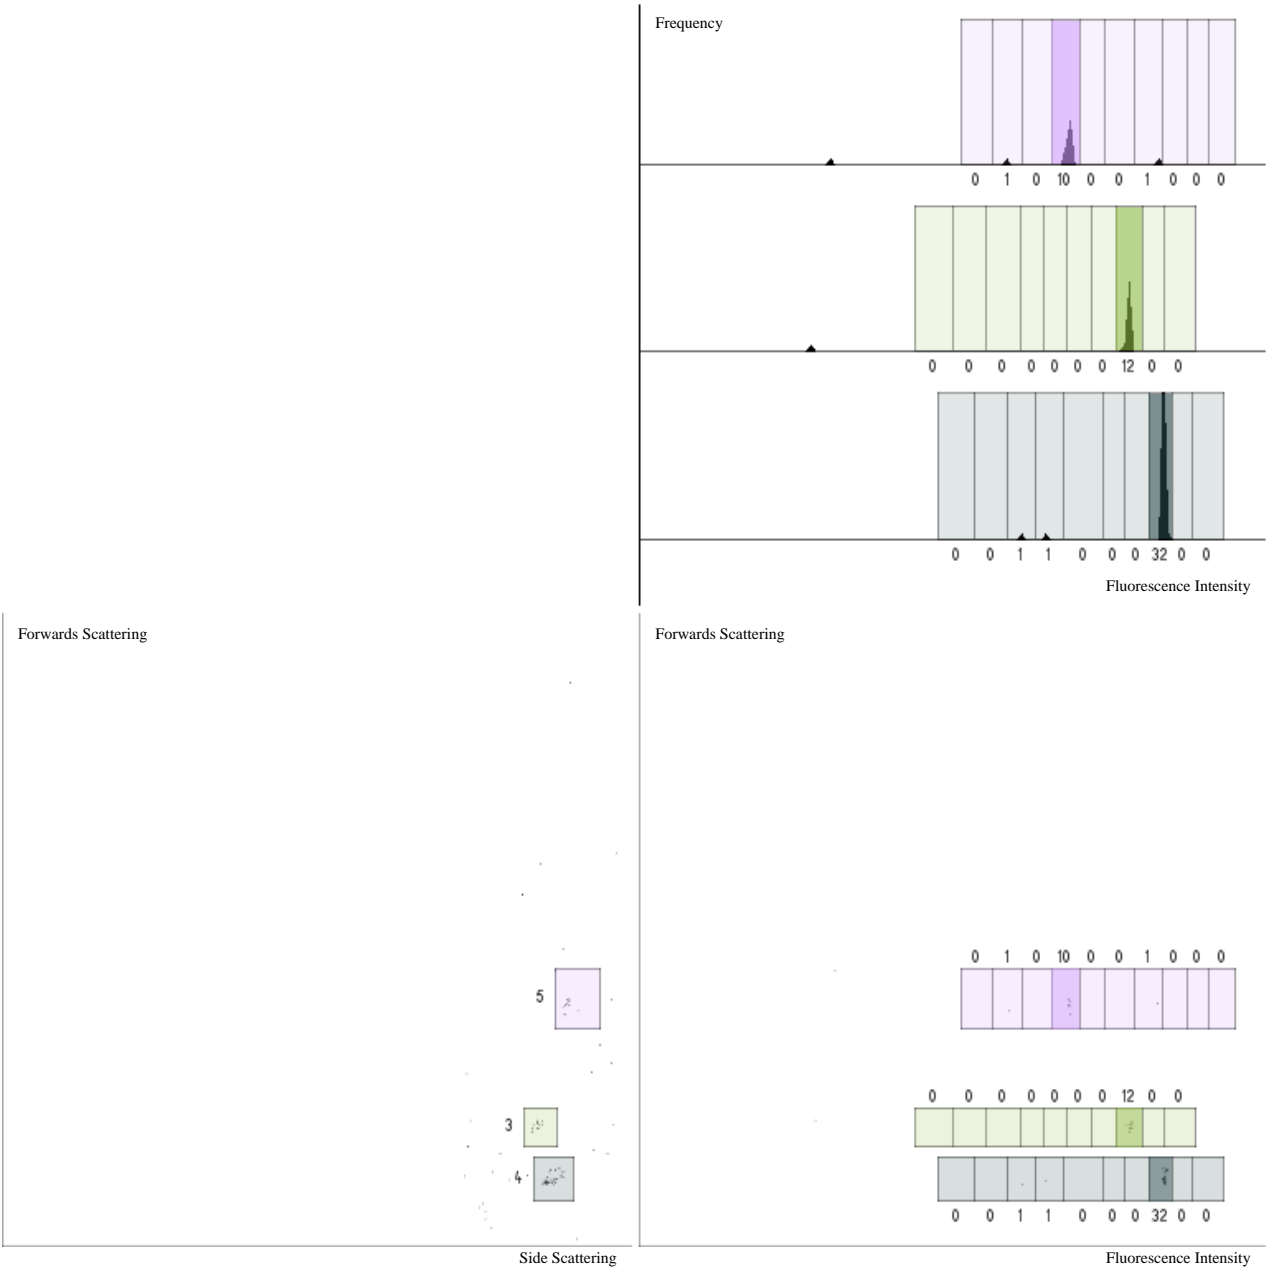

ANNEX 3: TAG DECONVOLUTION - BEAD 401

Passes flow sorting criteria: Yes  
Passes tag deconvolution criteria: No  
Included in protocol analysis: No  
Protocol: N/A  
Filename: Bin7\_plateA0\_D7.fcs  
Split 1: Petrol shading  
Split 2: Green shading  
Split 3: Violet shading

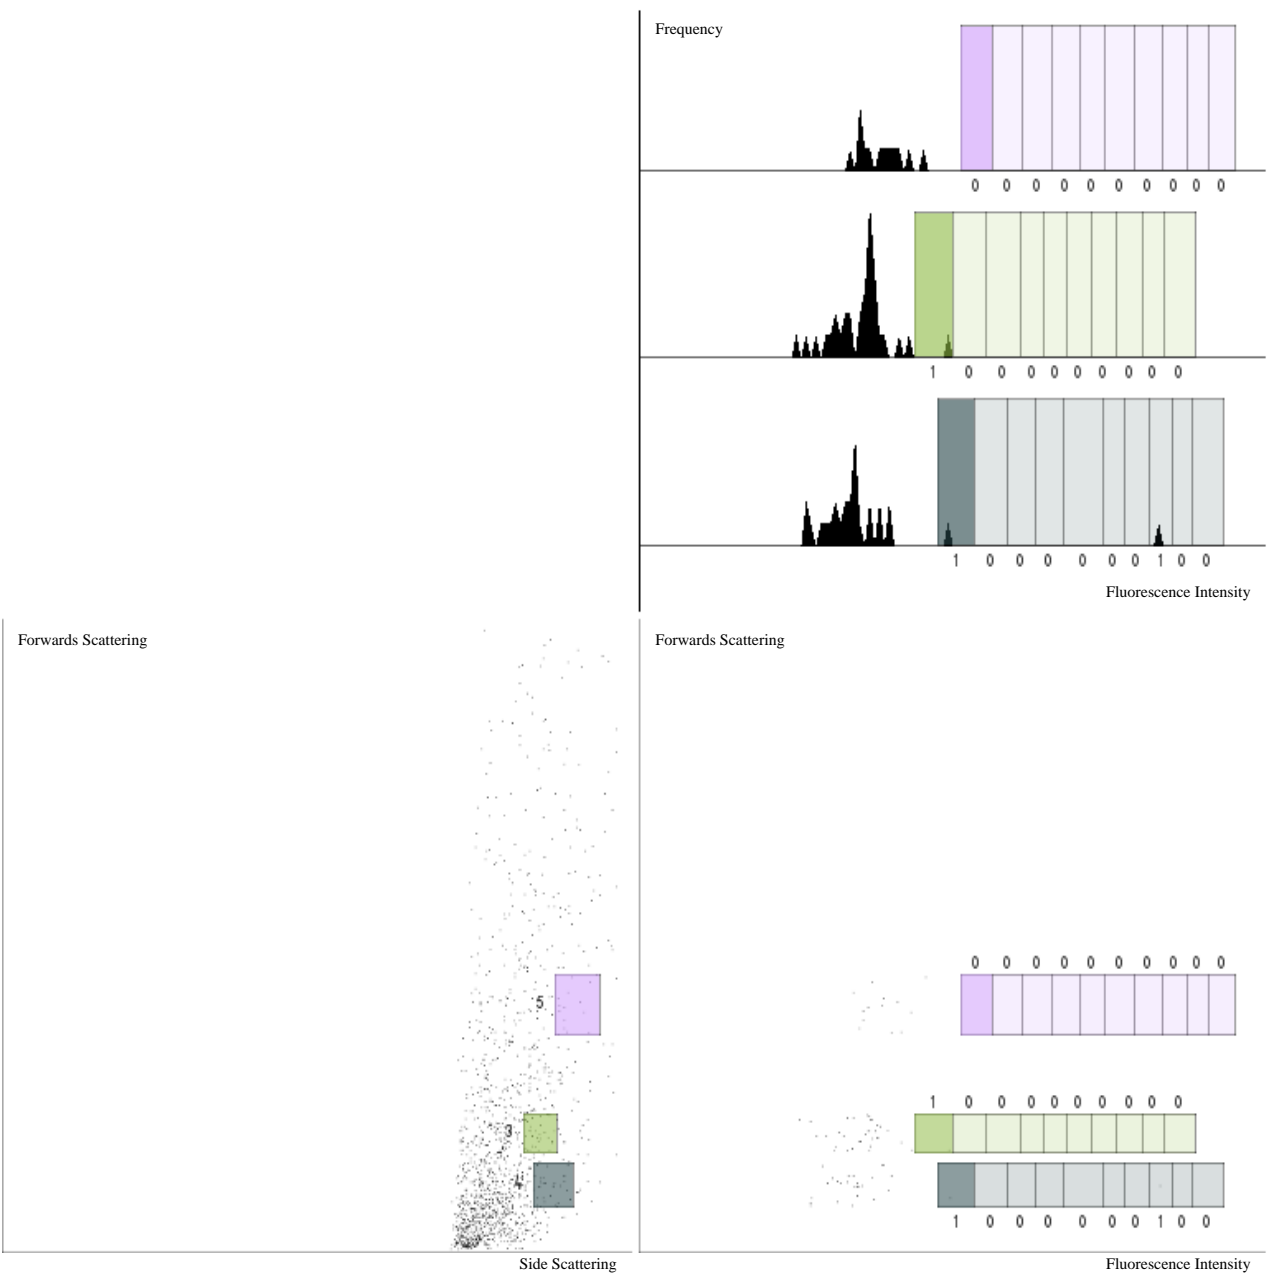

ANNEX 3: TAG DECONVOLUTION - BEAD 402

Passes flow sorting criteria: Yes  
Passes tag deconvolution criteria: Yes  
Included in protocol analysis: Yes  
Protocol: 5, 3, 2, 7  
Filename: Bin7\_plateA0\_D8.fcs  
Split 1: Petrol shading  
Split 2: Green shading  
Split 3: Violet shading

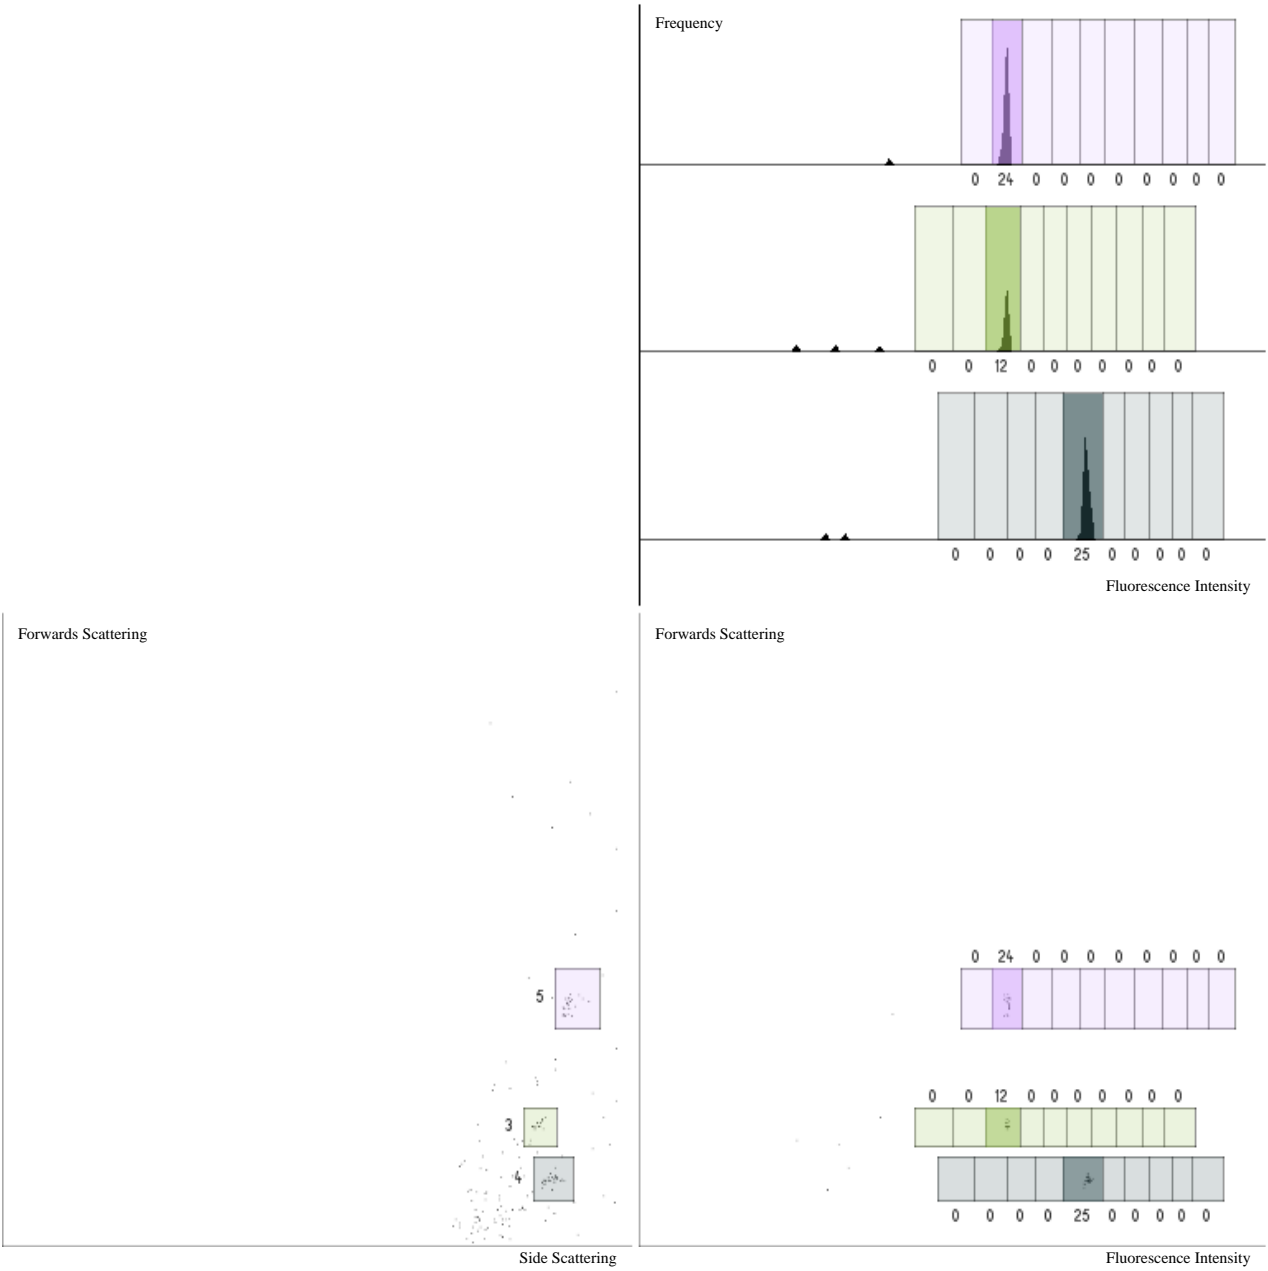

ANNEX 3: TAG DECONVOLUTION - BEAD 403

Passes flow sorting criteria: Yes  
Passes tag deconvolution criteria: Yes  
Included in protocol analysis: Yes  
Protocol: 7, 3, 6, 7  
Filename: Bin7\_plateA0\_D9.fcs  
Split 1: Petrol shading  
Split 2: Green shading  
Split 3: Violet shading

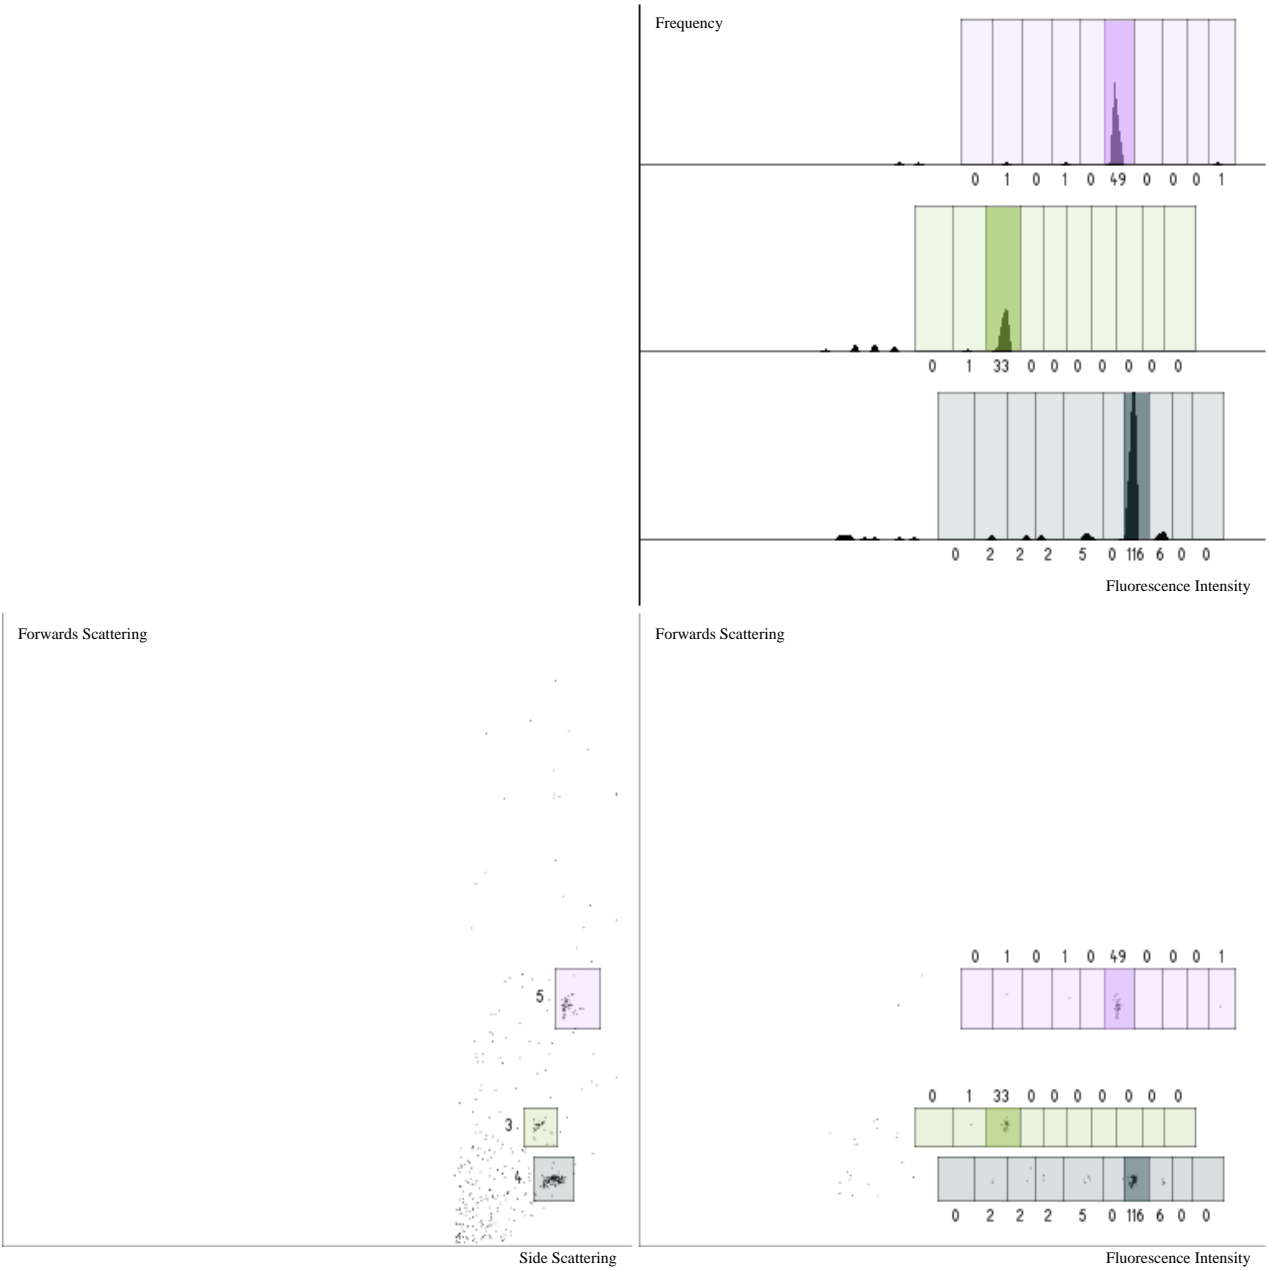

ANNEX 3: TAG DECONVOLUTION - BEAD 404

Passes flow sorting criteria: Yes  
Passes tag deconvolution criteria: Yes  
Included in protocol analysis: Yes  
Protocol: 8, 2, 10, 7  
Filename: Bin7\_plateA0\_D10.fcs  
Split 1: Petrol shading  
Split 2: Green shading  
Split 3: Violet shading

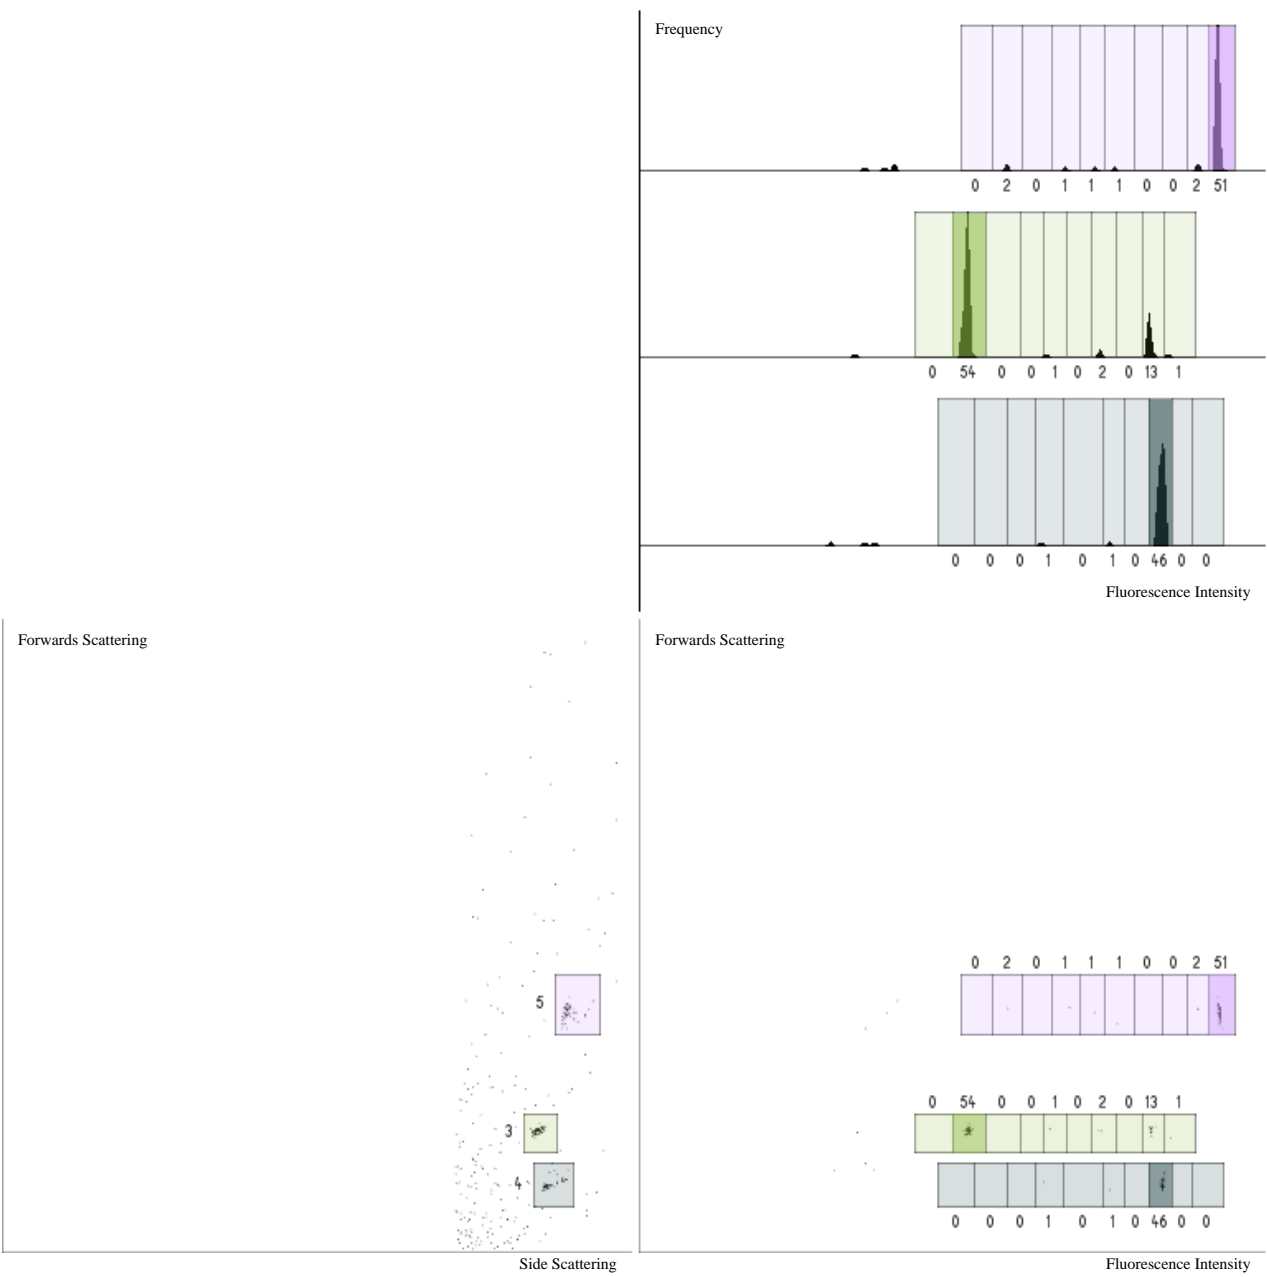

ANNEX 3: TAG DECONVOLUTION - BEAD 405

Passes flow sorting criteria: Yes  
Passes tag deconvolution criteria: Yes  
Included in protocol analysis: Yes  
Protocol: 3, 3, 4, 7  
Filename: Bin7\_plateA0\_D11.fcs  
Split 1: Petrol shading  
Split 2: Green shading  
Split 3: Violet shading

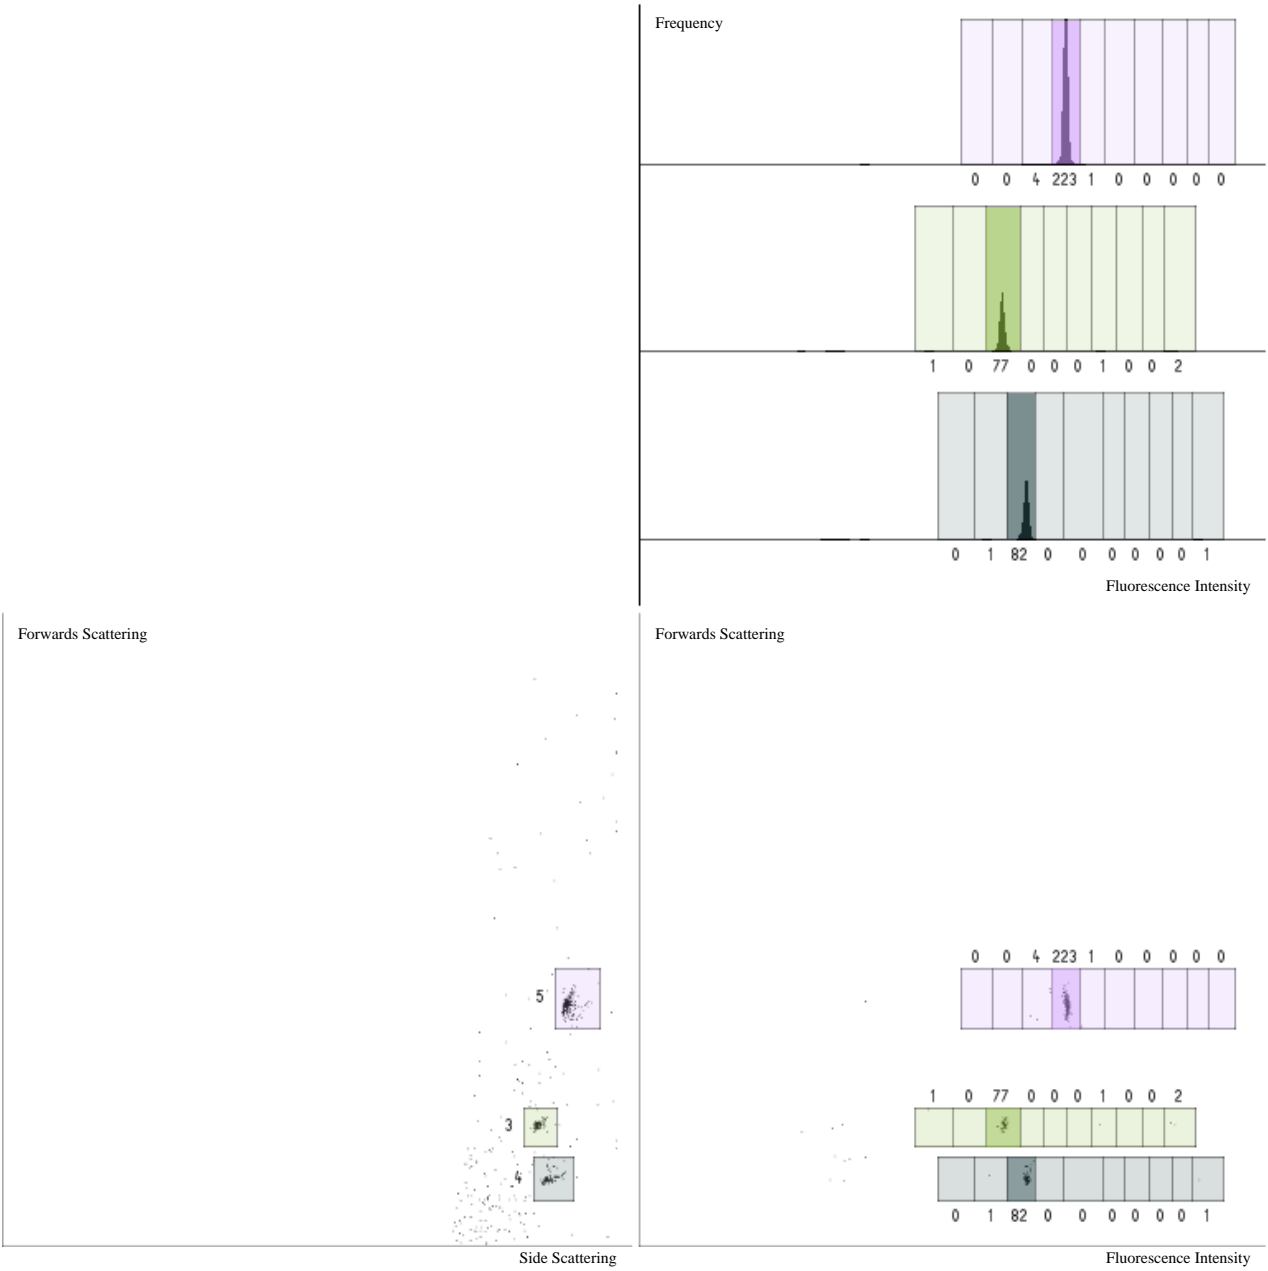

ANNEX 3: TAG DECONVOLUTION - BEAD 406

Passes flow sorting criteria: Yes  
Passes tag deconvolution criteria: Yes  
Included in protocol analysis: Yes  
Protocol: 10, 4, 9, 7  
Filename: Bin7\_plateA0\_D12.fcs  
Split 1: Petrol shading  
Split 2: Green shading  
Split 3: Violet shading

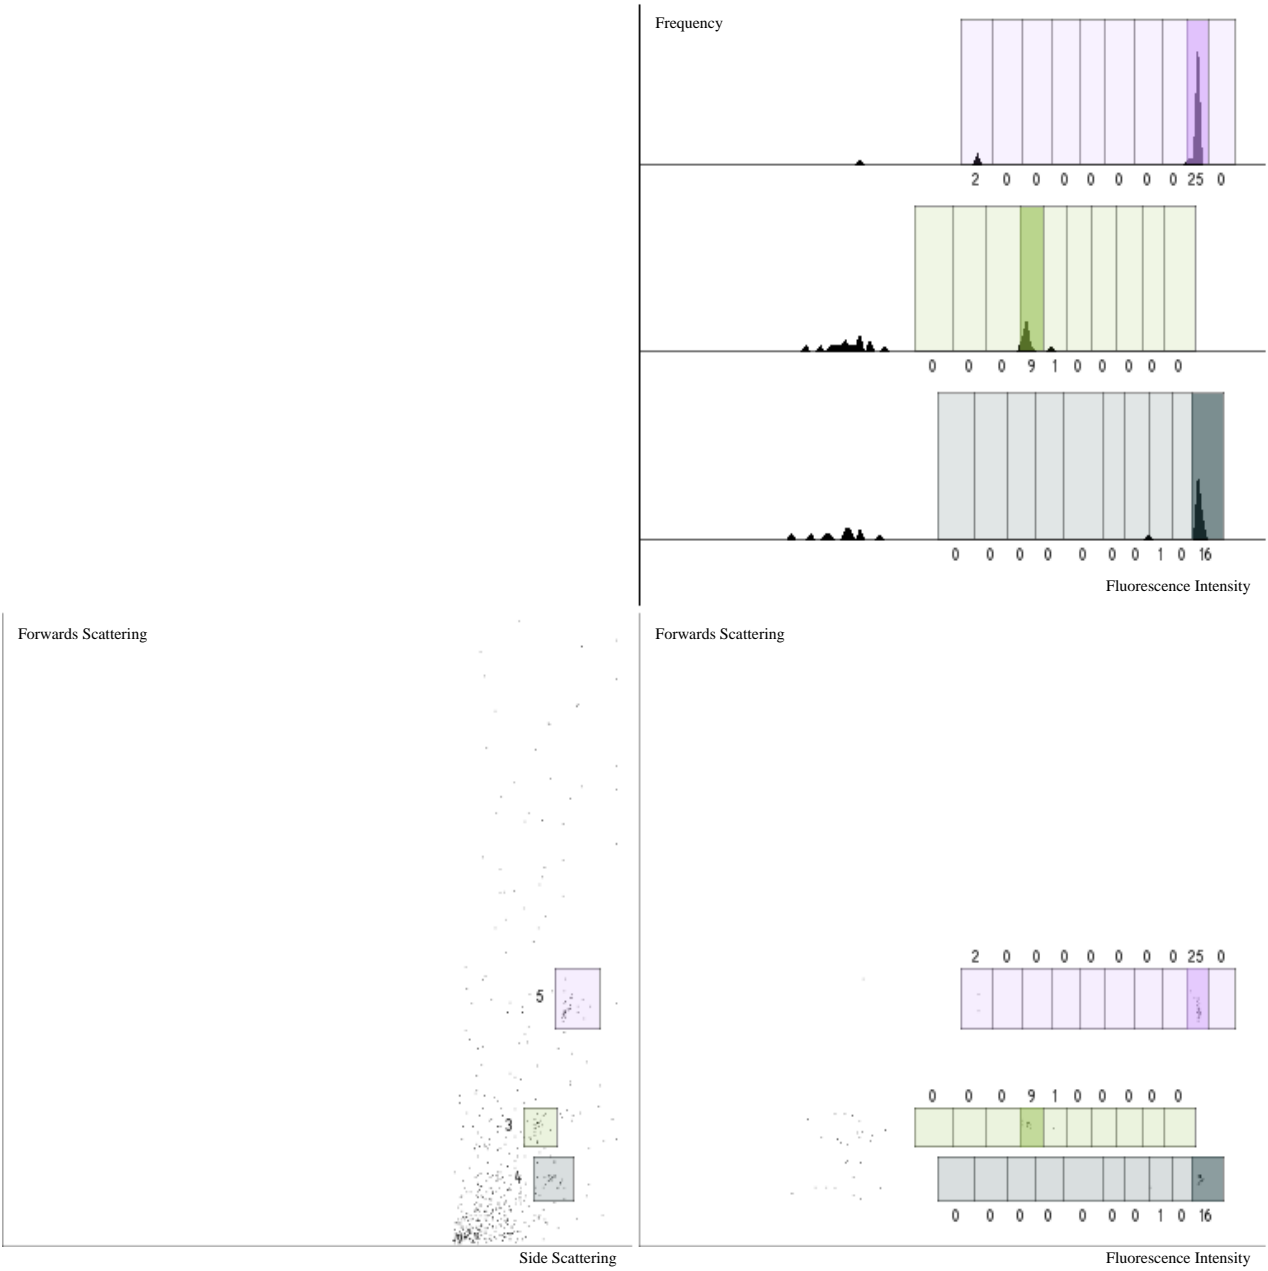



ANNEX 3: TAG DECONVOLUTION - BEAD 407

Passes flow sorting criteria: Yes  
Passes tag deconvolution criteria: No  
Included in protocol analysis: No  
Protocol: N/A  
Filename: Bin8\_plateA0\_F1.fcs  
Split 1: Petrol shading  
Split 2: Green shading  
Split 3: Violet shading

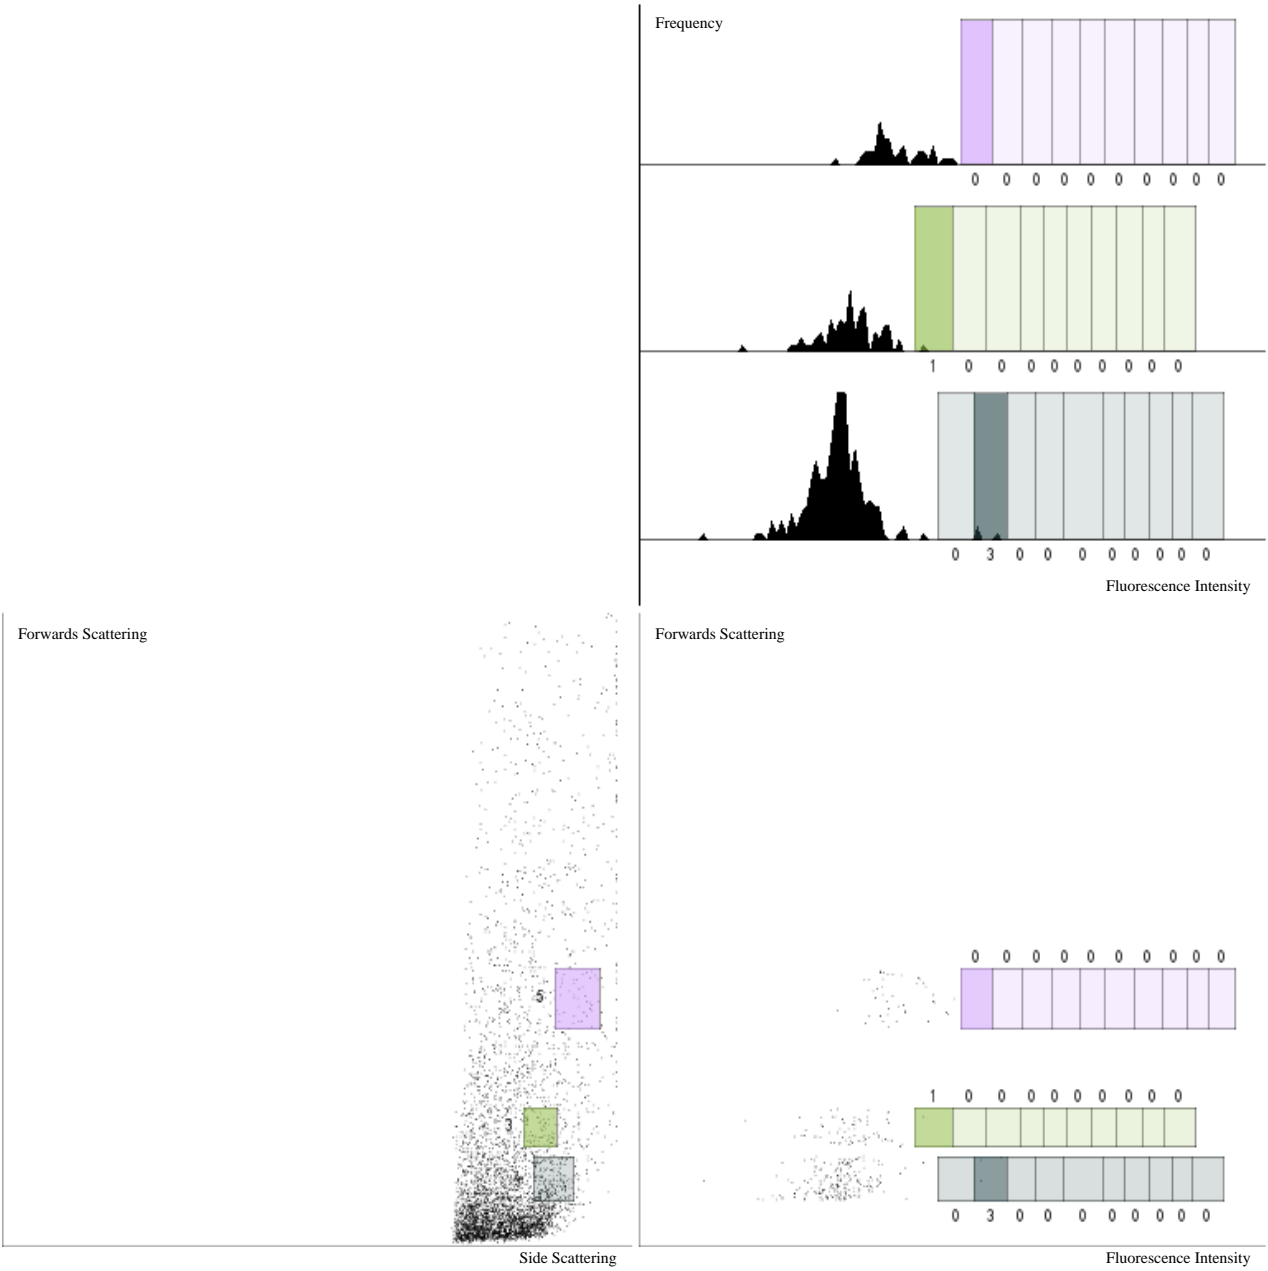

ANNEX 3: TAG DECONVOLUTION - BEAD 408

Passes flow sorting criteria: Yes  
Passes tag deconvolution criteria: Yes  
Included in protocol analysis: Yes  
Protocol: 1, 5, 1, 8  
Filename: Bin8\_plateA0\_F2.fcs  
Split 1: Petrol shading  
Split 2: Green shading  
Split 3: Violet shading

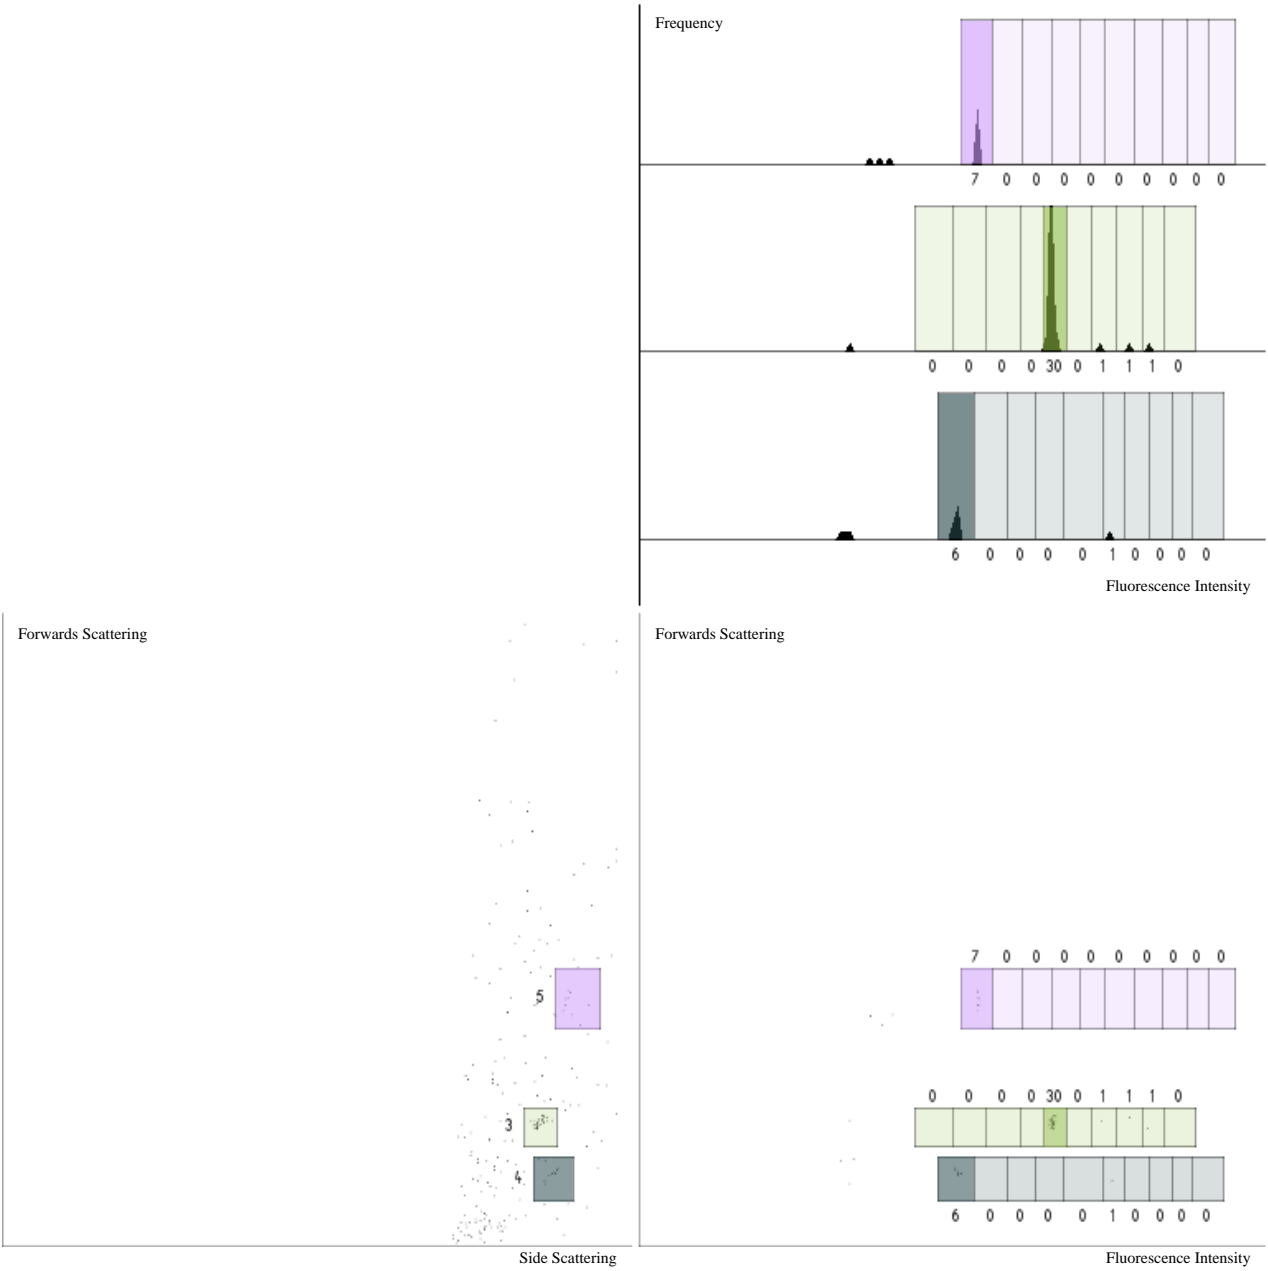

ANNEX 3: TAG DECONVOLUTION - BEAD 409

Passes flow sorting criteria: Yes  
Passes tag deconvolution criteria: Yes  
Included in protocol analysis: Yes  
Protocol: 8, 5, 9, 8  
Filename: Bin8\_plateA0\_F3.fcs  
Split 1: Petrol shading  
Split 2: Green shading  
Split 3: Violet shading

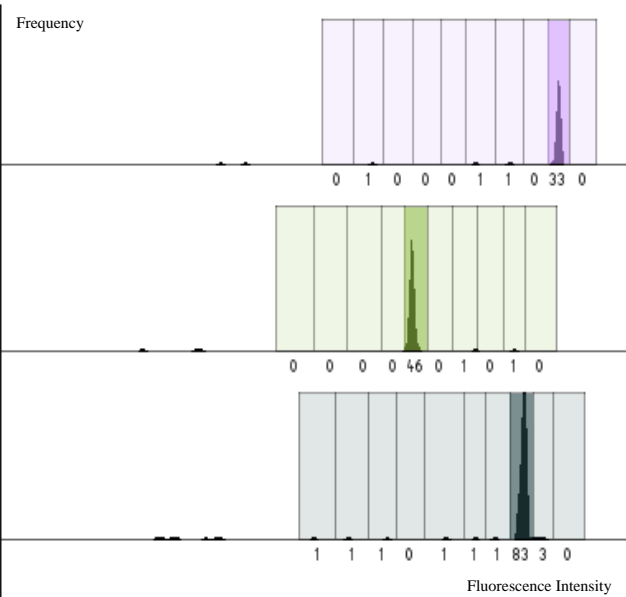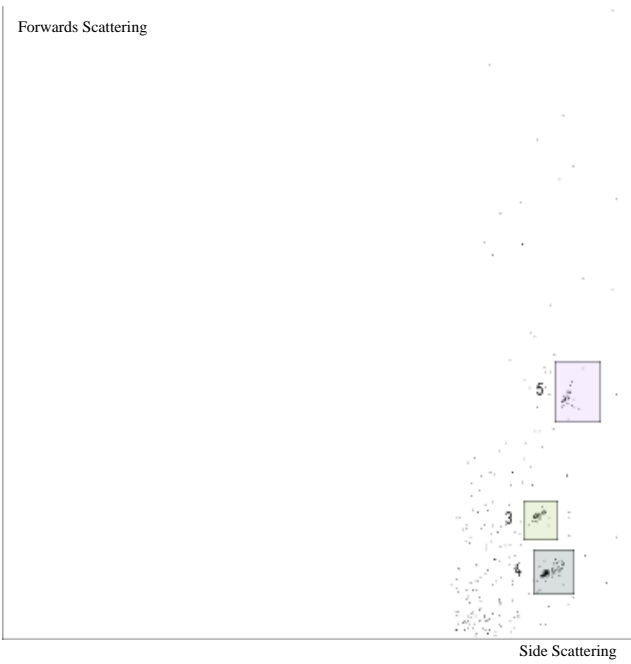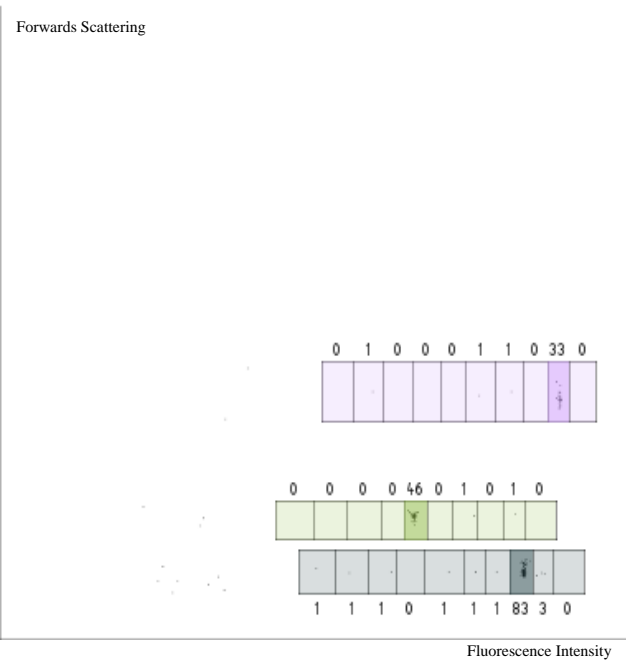

ANNEX 3: TAG DECONVOLUTION - BEAD 410

Passes flow sorting criteria: Yes  
Passes tag deconvolution criteria: Yes  
Included in protocol analysis: Yes  
Protocol: 7, 9, 10, 8  
Filename: Bin8\_plateA0\_F4.fcs  
Split 1: Petrol shading  
Split 2: Green shading  
Split 3: Violet shading

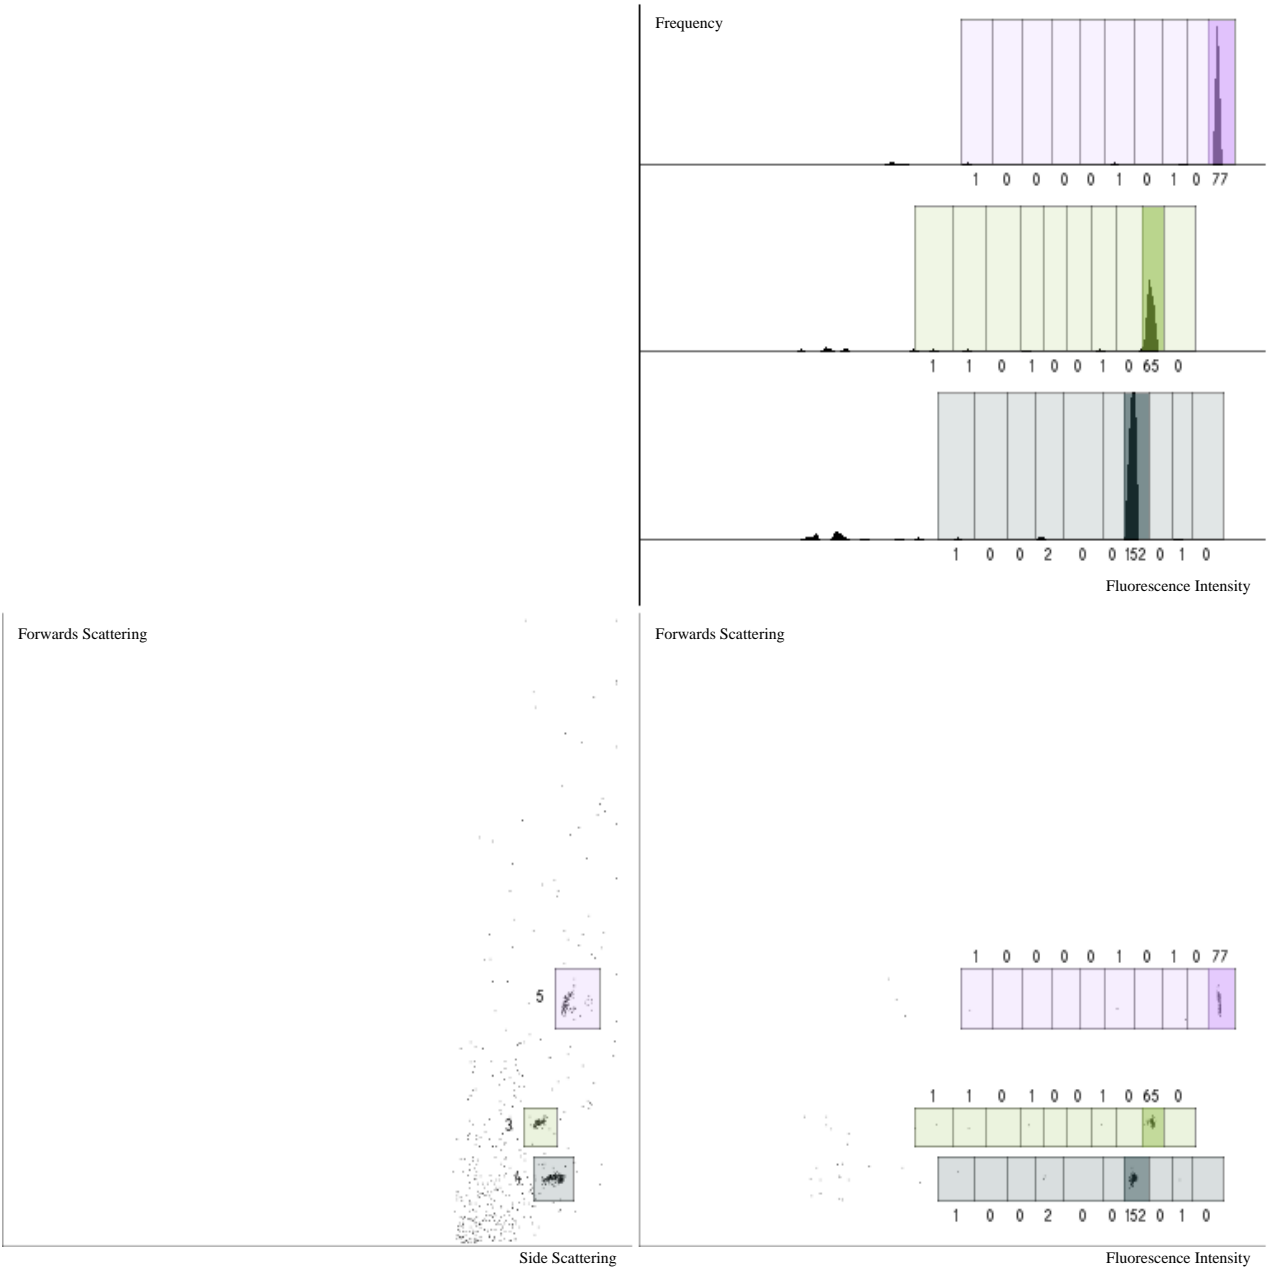

ANNEX 3: TAG DECONVOLUTION - BEAD 411

Passes flow sorting criteria: Yes  
Passes tag deconvolution criteria: Yes  
Included in protocol analysis: Yes  
Protocol: 7, 6, 1, 8  
Filename: Bin8\_plateA0\_F5.fcs  
Split 1: Petrol shading  
Split 2: Green shading  
Split 3: Violet shading

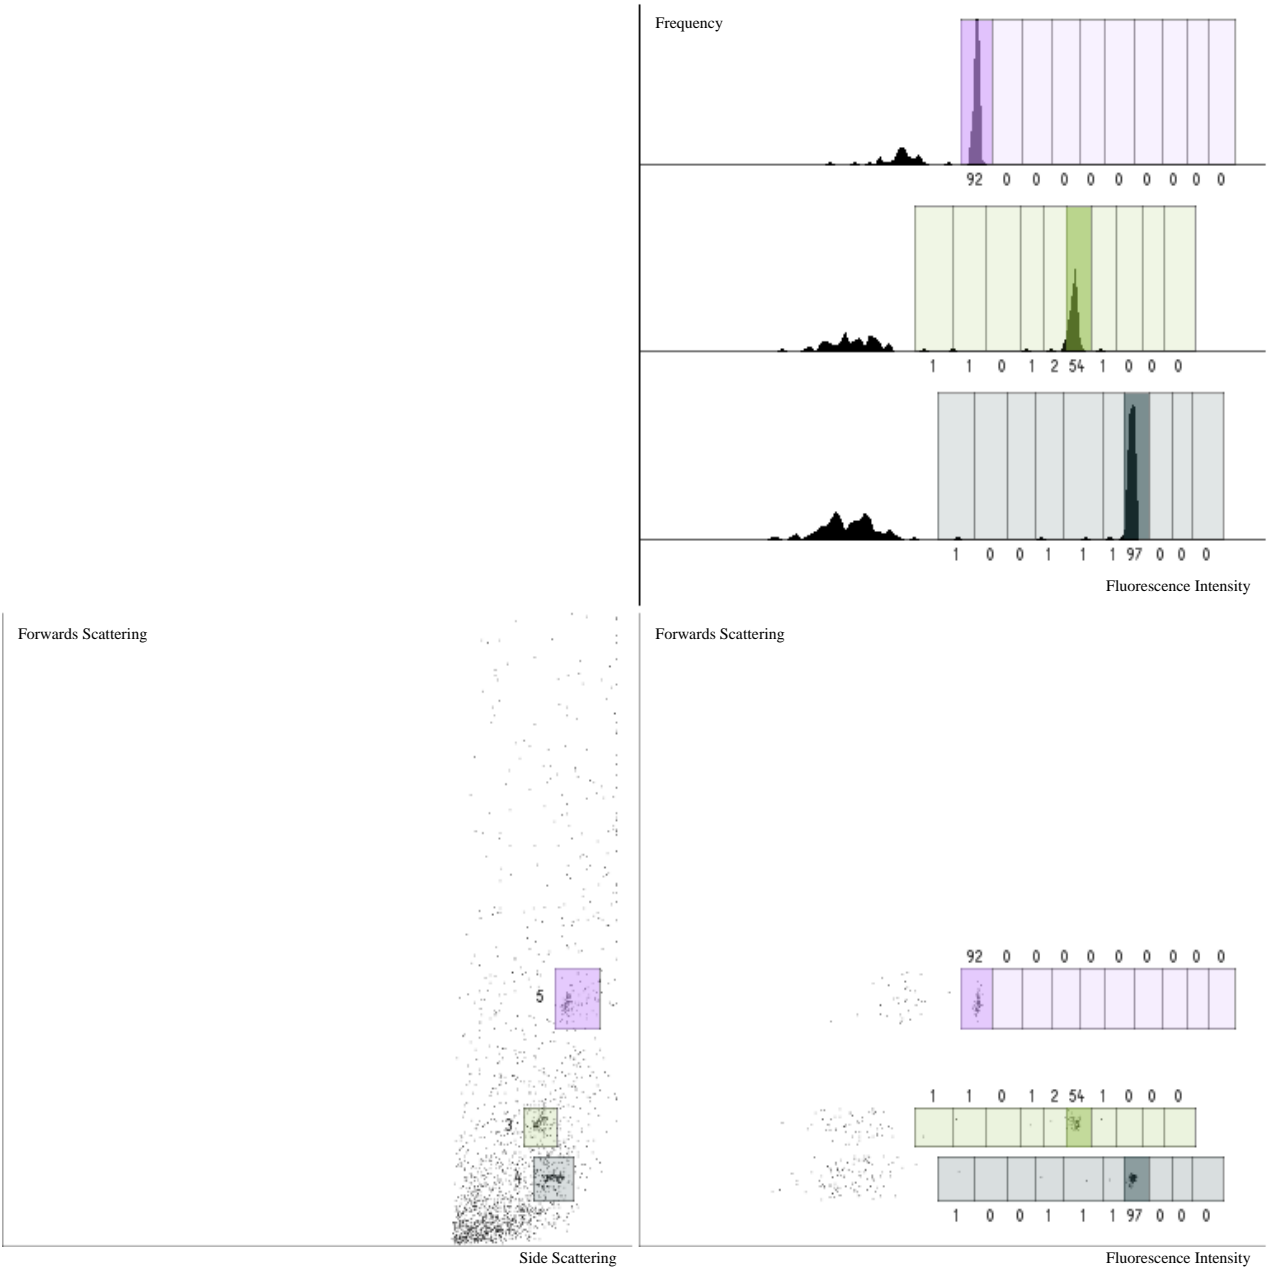

ANNEX 3: TAG DECONVOLUTION - BEAD 412

Passes flow sorting criteria: Yes  
Passes tag deconvolution criteria: Yes  
Included in protocol analysis: Yes  
Protocol: 6, 6, 6, 8  
Filename: Bin8\_plateA0\_F6.fcs  
Split 1: Petrol shading  
Split 2: Green shading  
Split 3: Violet shading

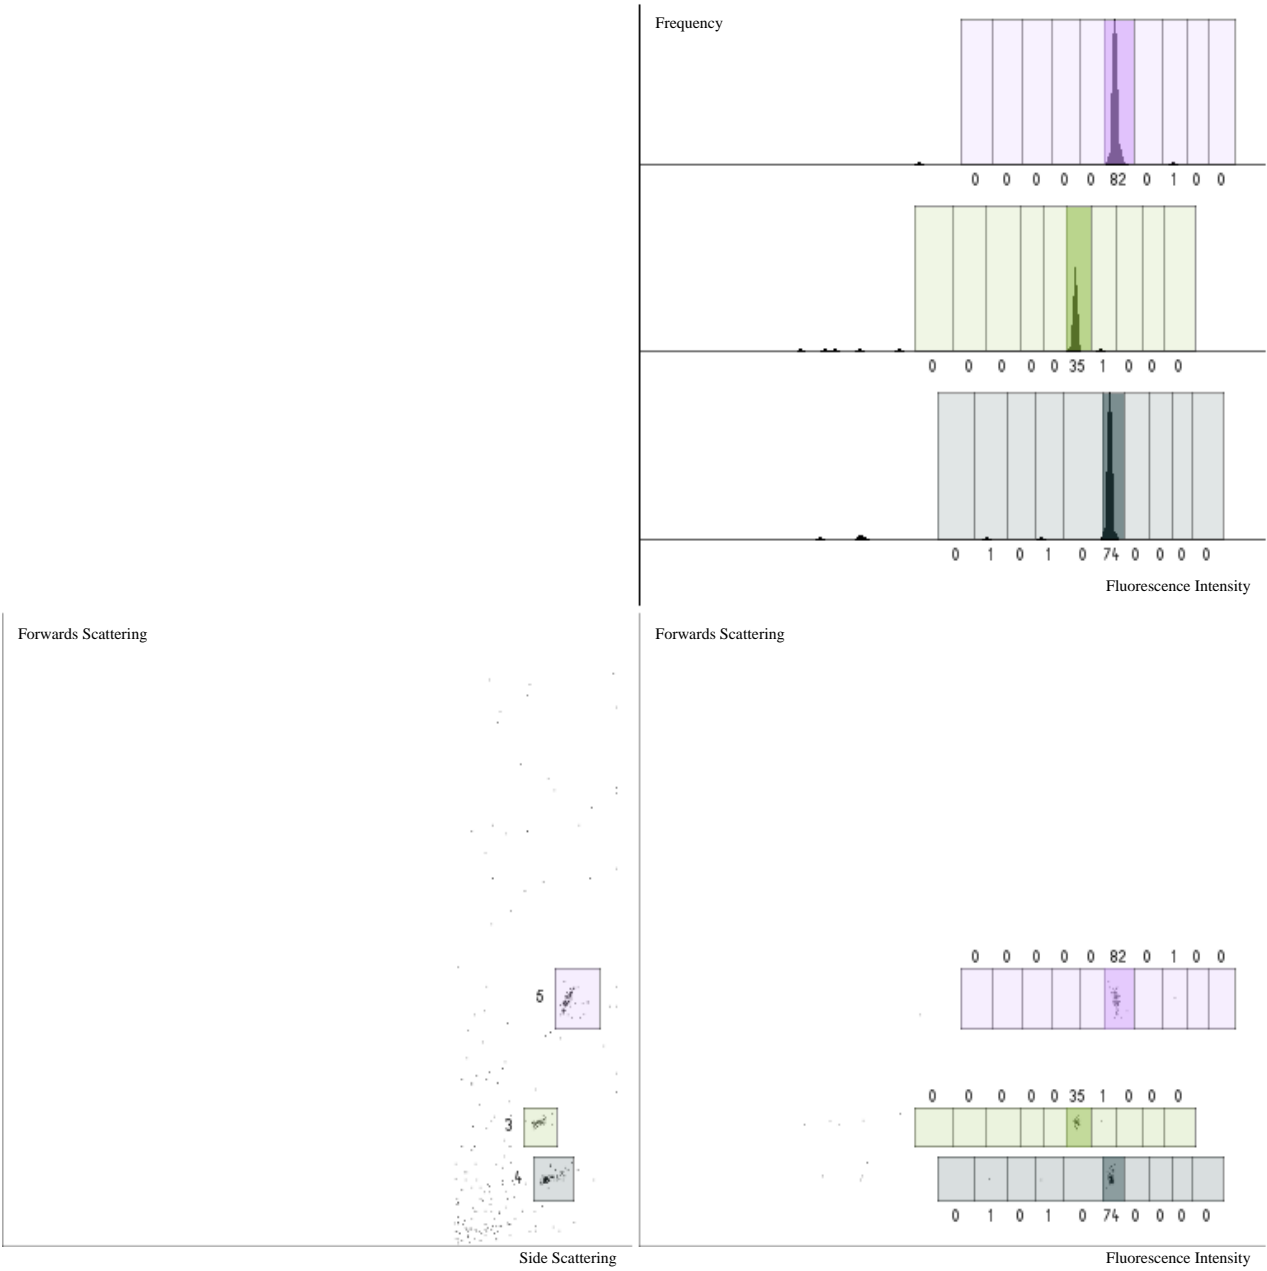

ANNEX 3: TAG DECONVOLUTION - BEAD 413

Passes flow sorting criteria: Yes  
Passes tag deconvolution criteria: Yes  
Included in protocol analysis: Yes  
Protocol: 2, 3, 5, 8  
Filename: Bin8\_plateA0\_F7.fcs  
Split 1: Petrol shading  
Split 2: Green shading  
Split 3: Violet shading

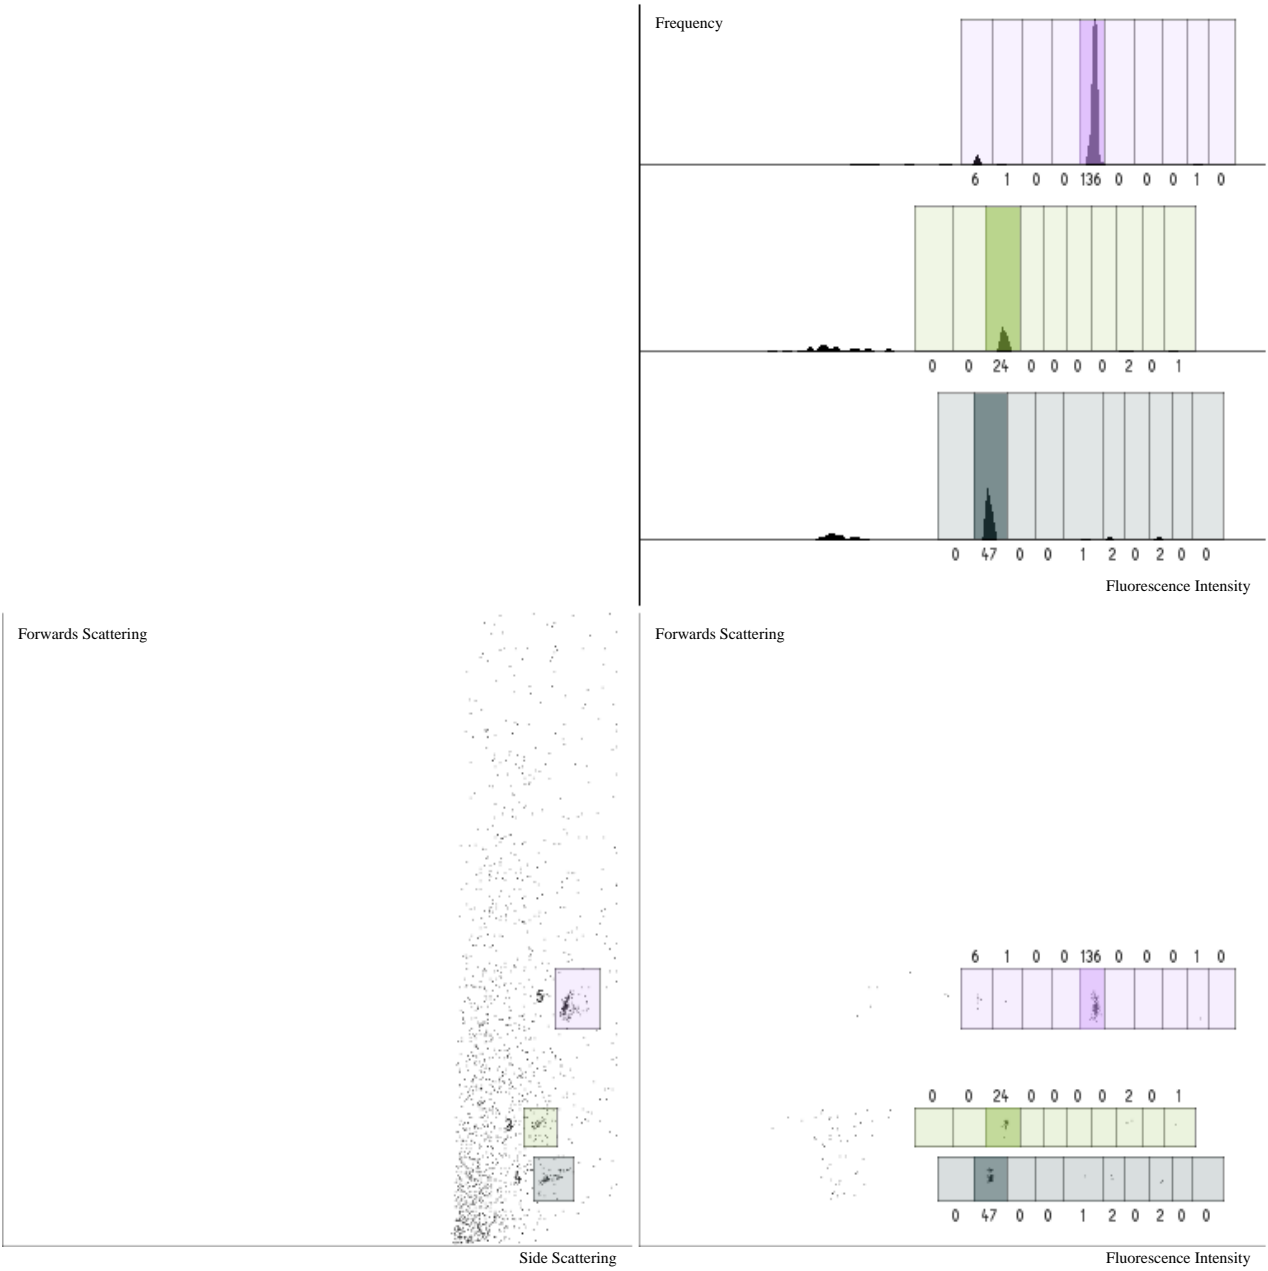

ANNEX 3: TAG DECONVOLUTION - BEAD 414

Passes flow sorting criteria: Yes  
Passes tag deconvolution criteria: No  
Included in protocol analysis: No  
Protocol: N/A  
Filename: Bin8\_plateA0\_F8.fcs  
Split 1: Petrol shading  
Split 2: Green shading  
Split 3: Violet shading

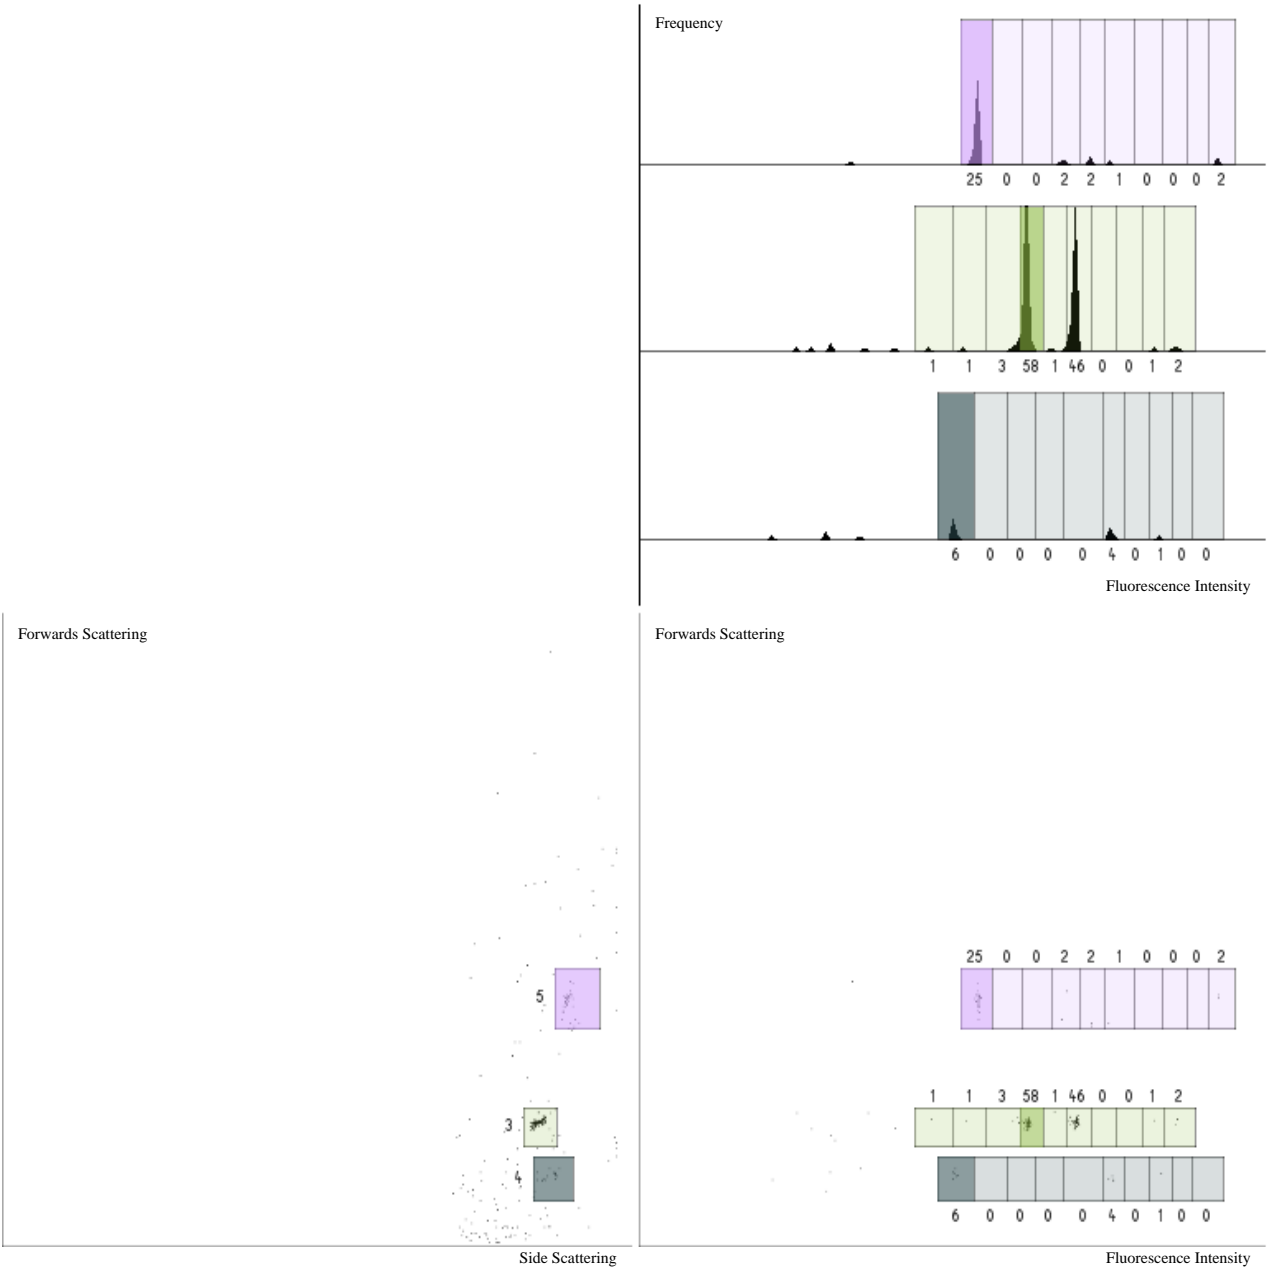



ANNEX 3: TAG DECONVOLUTION - BEAD 415

Passes flow sorting criteria: Yes  
Passes tag deconvolution criteria: No  
Included in protocol analysis: No  
Protocol: N/A  
Filename: Bin8\_plateA0\_F9.fcs  
Split 1: Petrol shading  
Split 2: Green shading  
Split 3: Violet shading

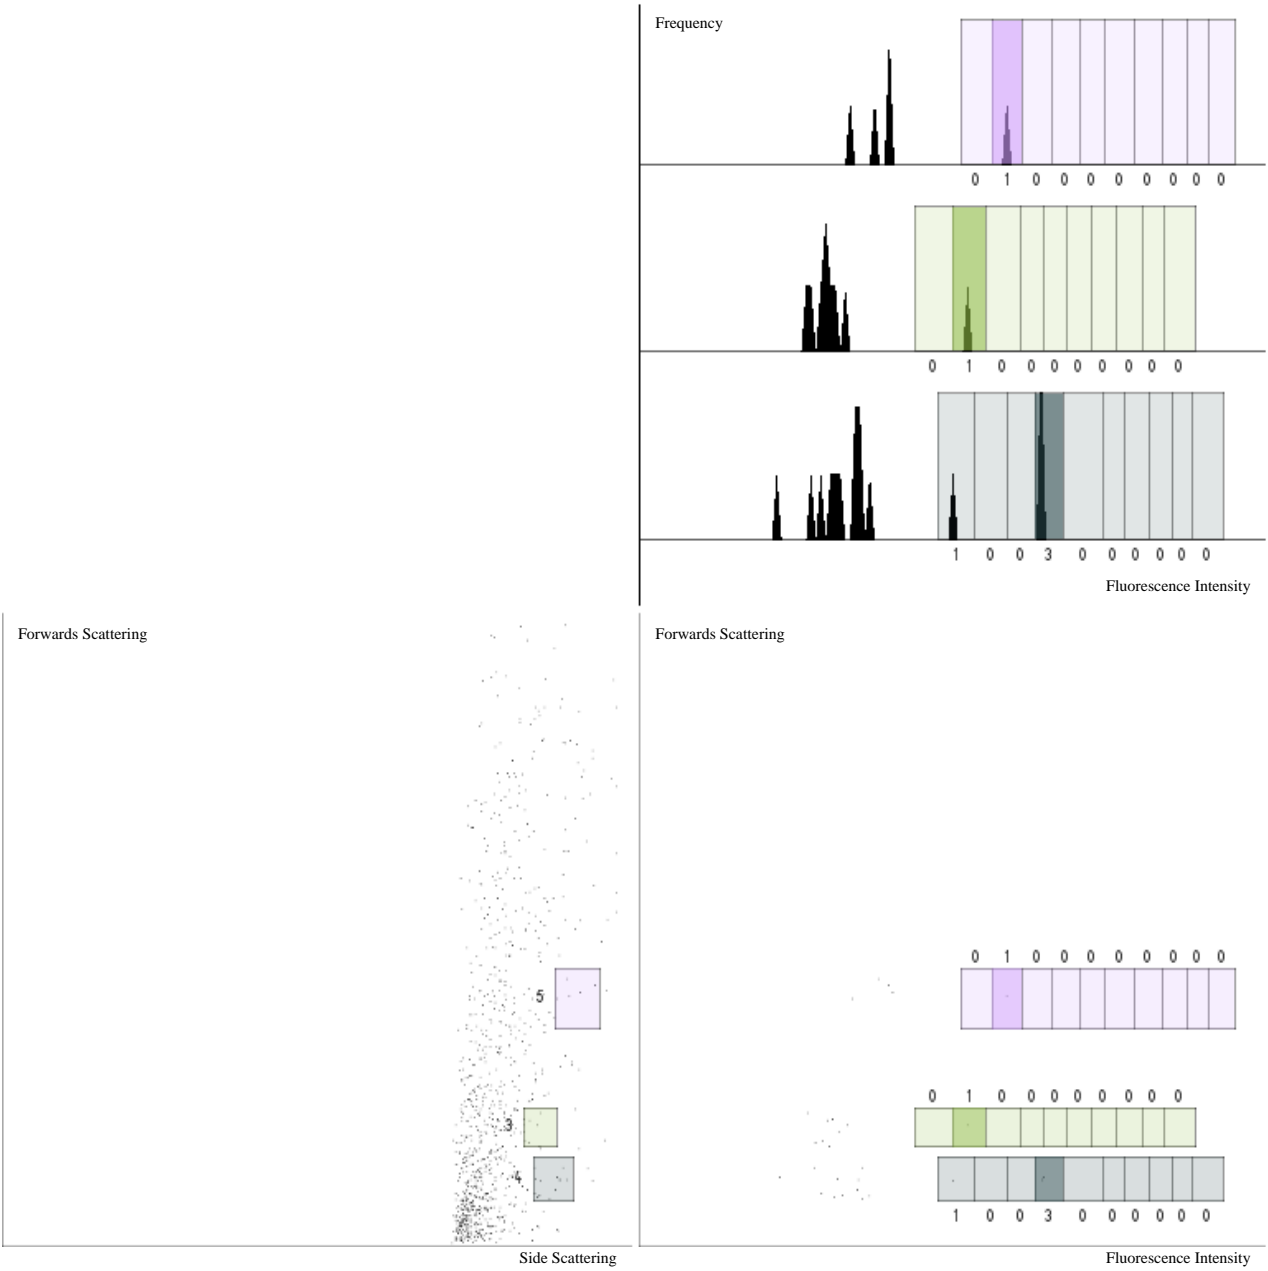

ANNEX 3: TAG DECONVOLUTION - BEAD 416

Passes flow sorting criteria: Yes  
Passes tag deconvolution criteria: No  
Included in protocol analysis: No  
Protocol: N/A  
Filename: Bin8\_plateA0\_F10.fcs  
Split 1: Petrol shading  
Split 2: Green shading  
Split 3: Violet shading

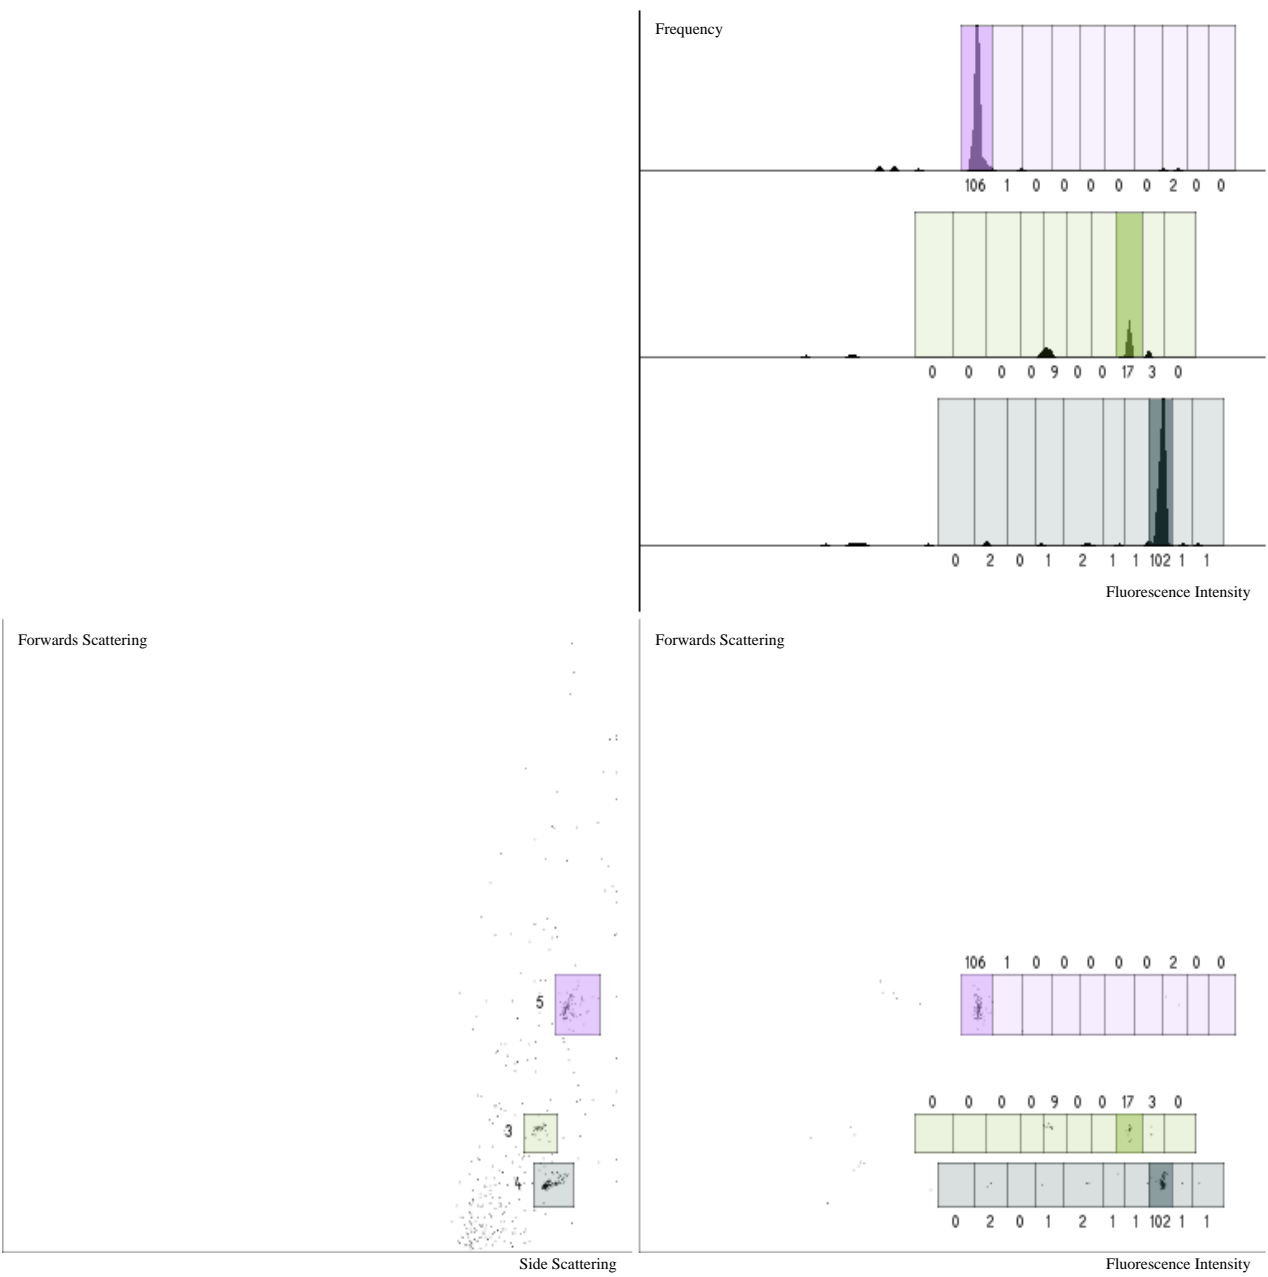

ANNEX 3: TAG DECONVOLUTION - BEAD 417

Passes flow sorting criteria: Yes  
Passes tag deconvolution criteria: No  
Included in protocol analysis: No  
Protocol: N/A  
Filename: Bin8\_plateA0\_F11.fcs  
Split 1: Petrol shading  
Split 2: Green shading  
Split 3: Violet shading

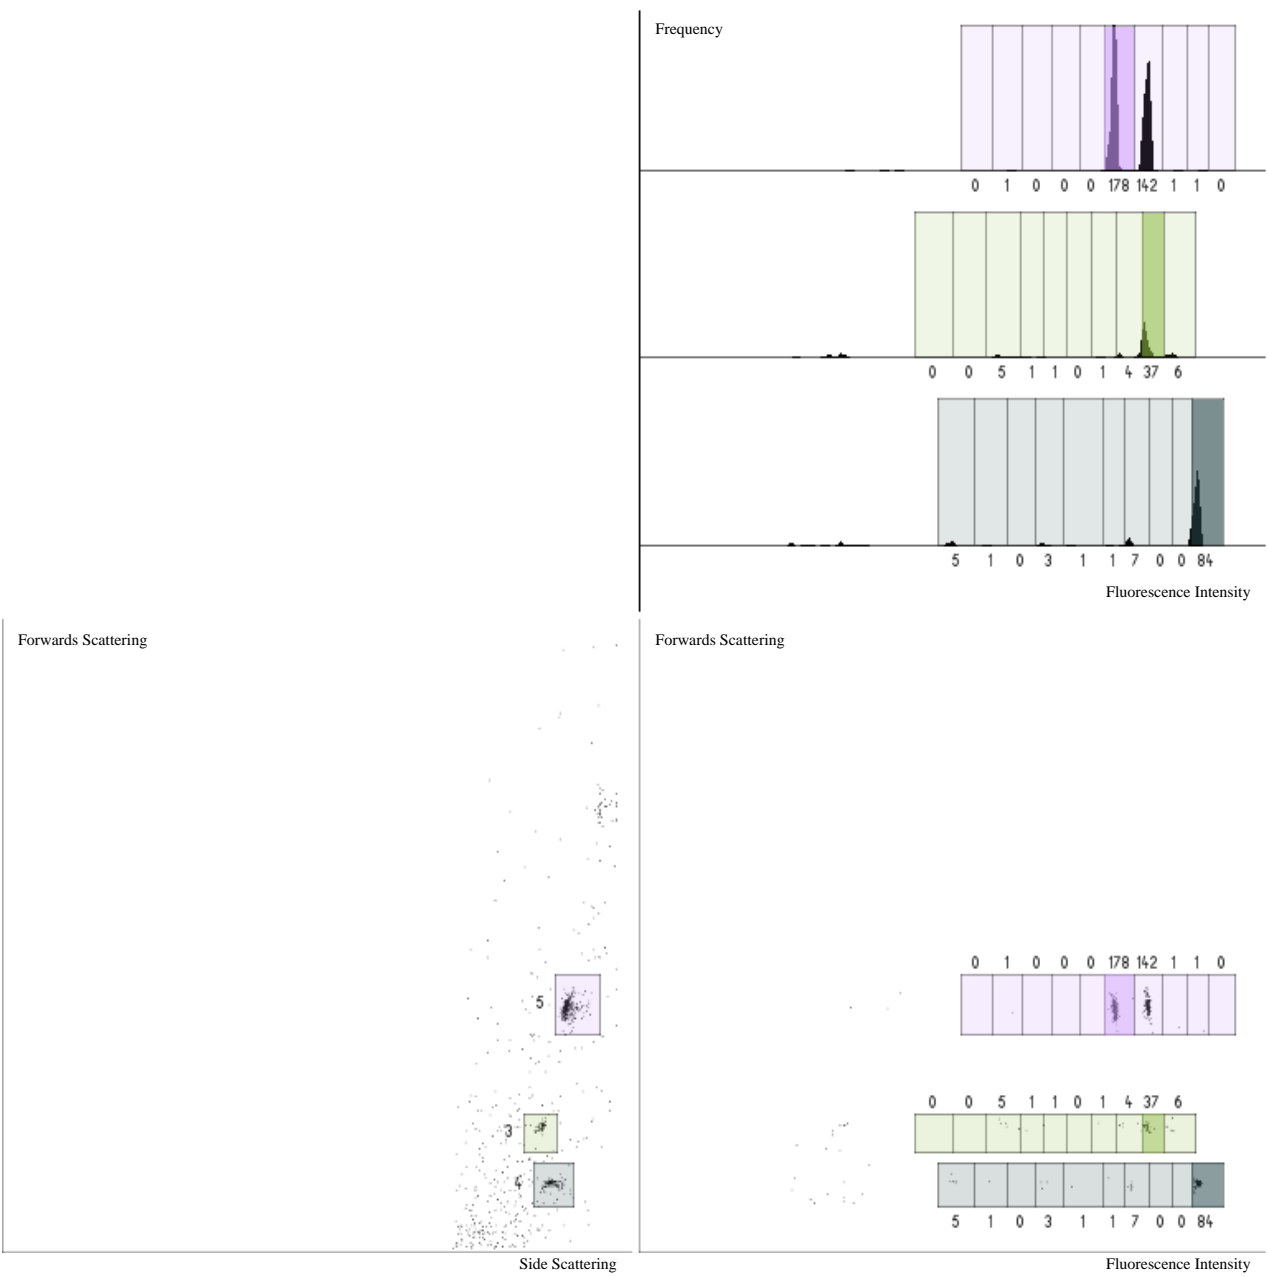

ANNEX 3: TAG DECONVOLUTION - BEAD 418

Passes flow sorting criteria: Yes  
Passes tag deconvolution criteria: Yes  
Included in protocol analysis: Yes  
Protocol: 2, 5, 7, 8  
Filename: Bin8\_plateA0\_F12.fcs  
Split 1: Petrol shading  
Split 2: Green shading  
Split 3: Violet shading

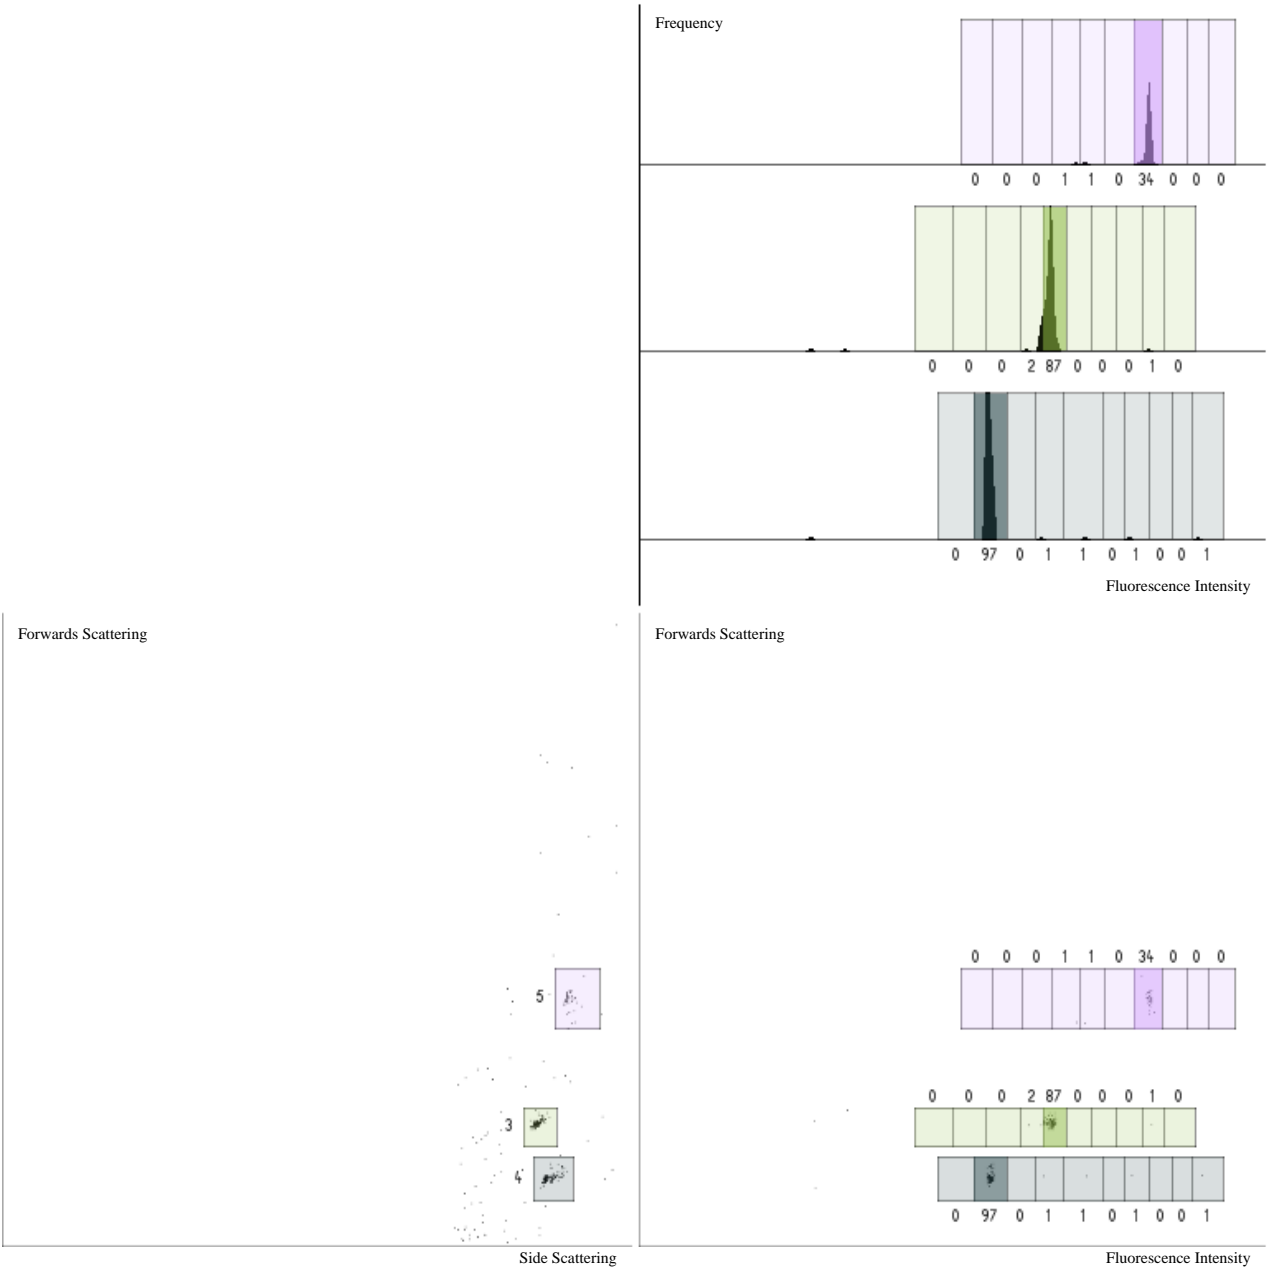

ANNEX 3: TAG DECONVOLUTION - BEAD 419

Passes flow sorting criteria: Yes  
Passes tag deconvolution criteria: No  
Included in protocol analysis: No  
Protocol: N/A  
Filename: Bin8\_plateA0\_G4.fcs  
Split 1: Petrol shading  
Split 2: Green shading  
Split 3: Violet shading

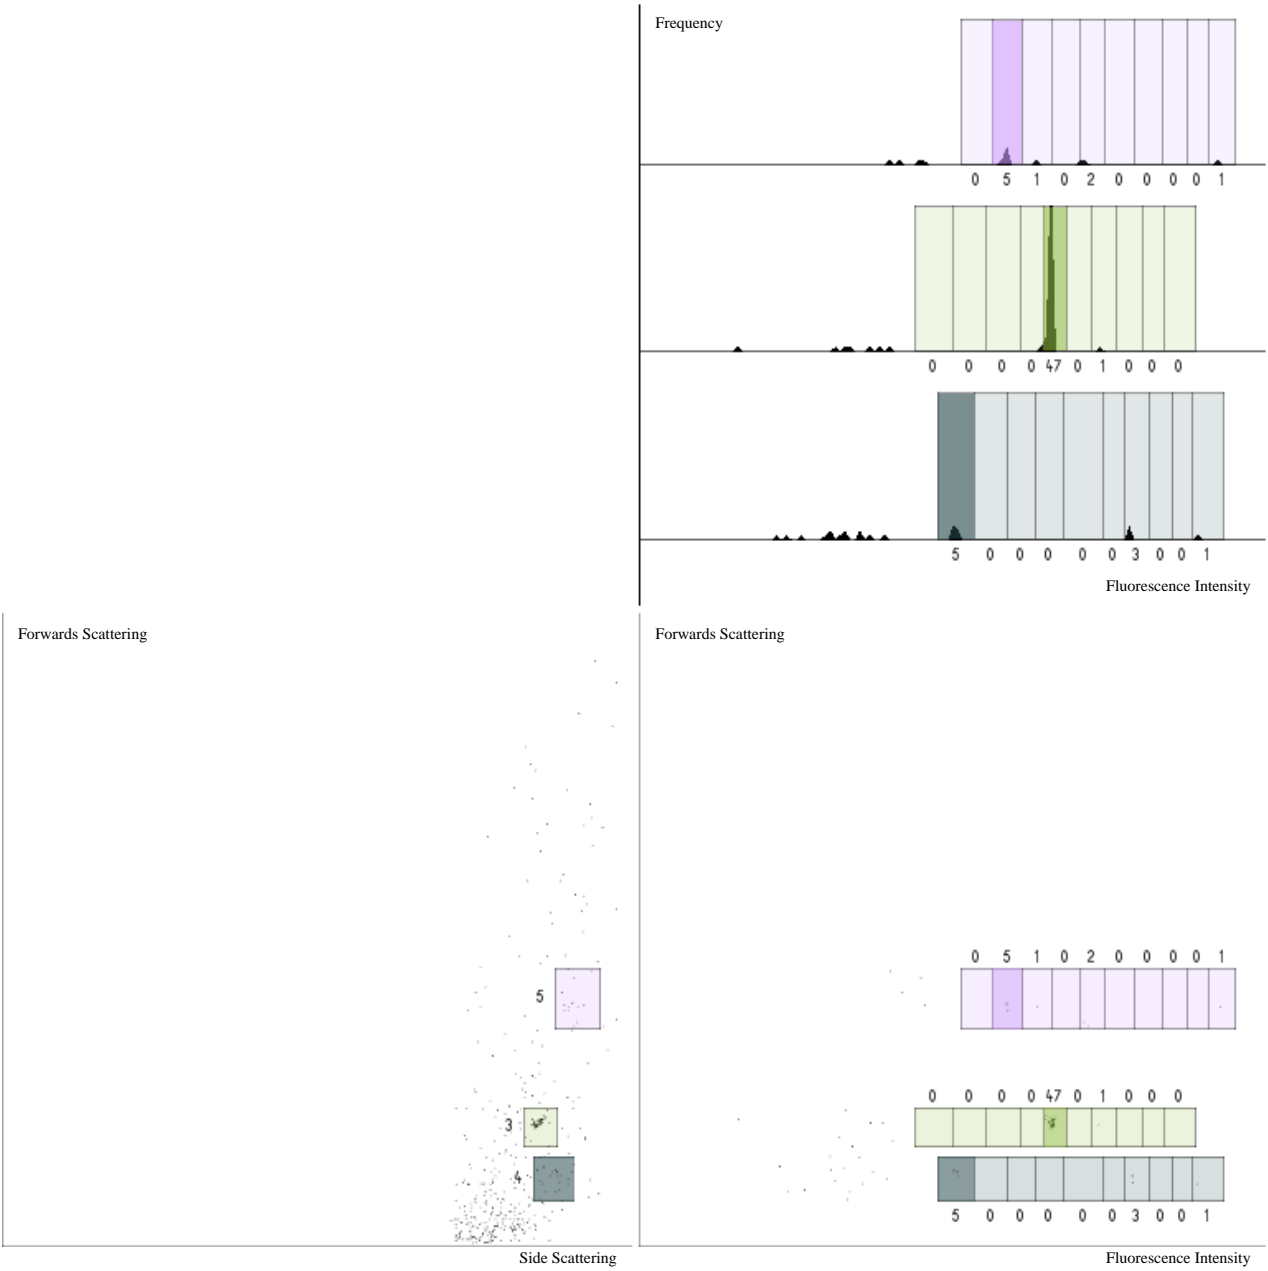

ANNEX 3: TAG DECONVOLUTION - BEAD 420

Passes flow sorting criteria: Yes  
Passes tag deconvolution criteria: Yes  
Included in protocol analysis: Yes  
Protocol: 1, 8, 1, 8  
Filename: Bin8\_plateA0\_G5.fcs  
Split 1: Petrol shading  
Split 2: Green shading  
Split 3: Violet shading

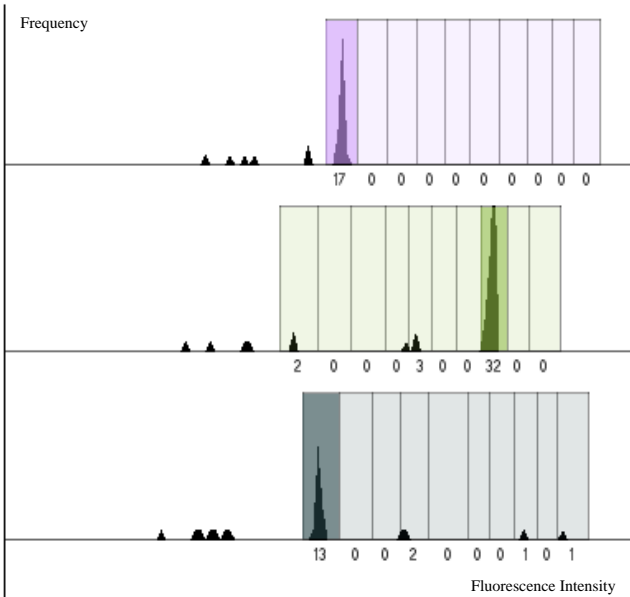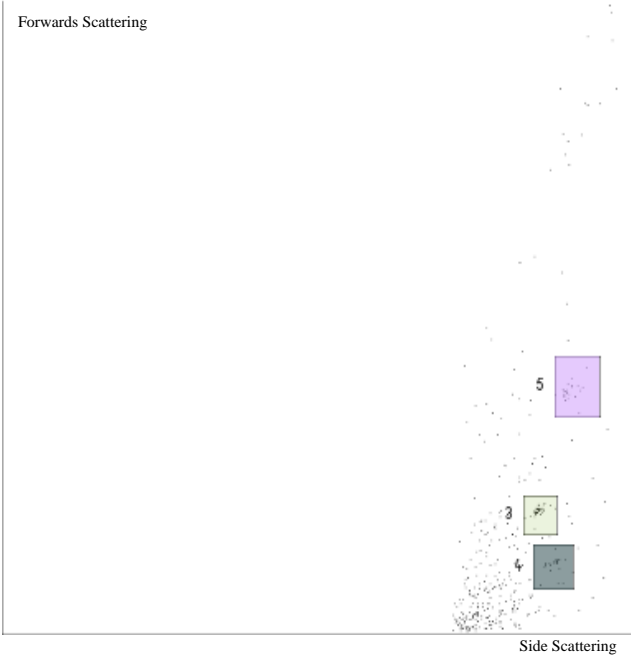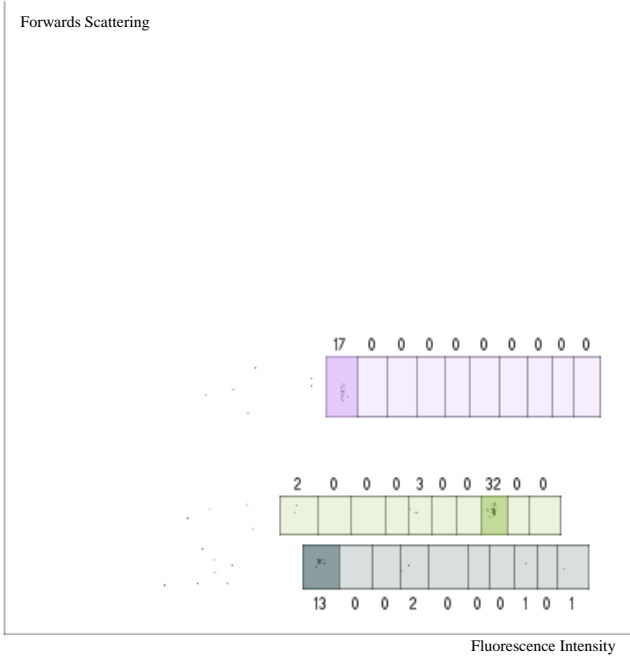

ANNEX 3: TAG DECONVOLUTION - BEAD 421

Passes flow sorting criteria: Yes  
Passes tag deconvolution criteria: No  
Included in protocol analysis: No  
Protocol: N/A  
Filename: Bin8\_plateA0\_G6.fcs  
Split 1: Petrol shading  
Split 2: Green shading  
Split 3: Violet shading

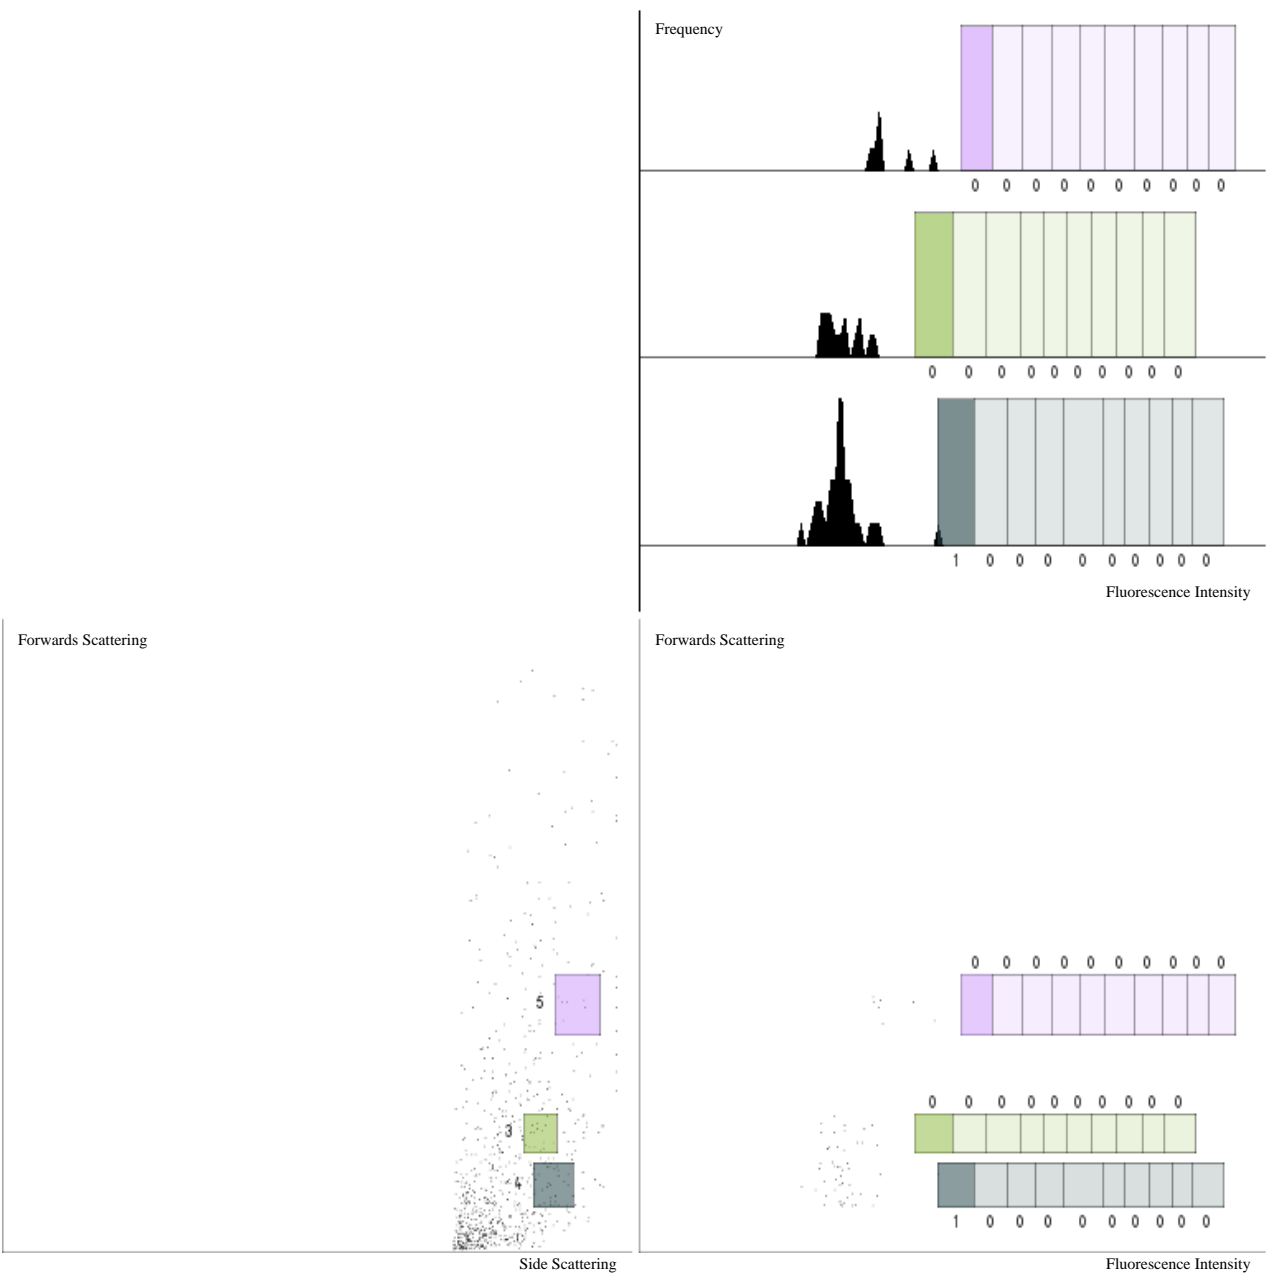

ANNEX 3: TAG DECONVOLUTION - BEAD 422

Passes flow sorting criteria: Yes  
Passes tag deconvolution criteria: Yes  
Included in protocol analysis: Yes  
Protocol: 9, 9, 9, 8  
Filename: Bin8\_plateA0\_G7.fcs  
Split 1: Petrol shading  
Split 2: Green shading  
Split 3: Violet shading

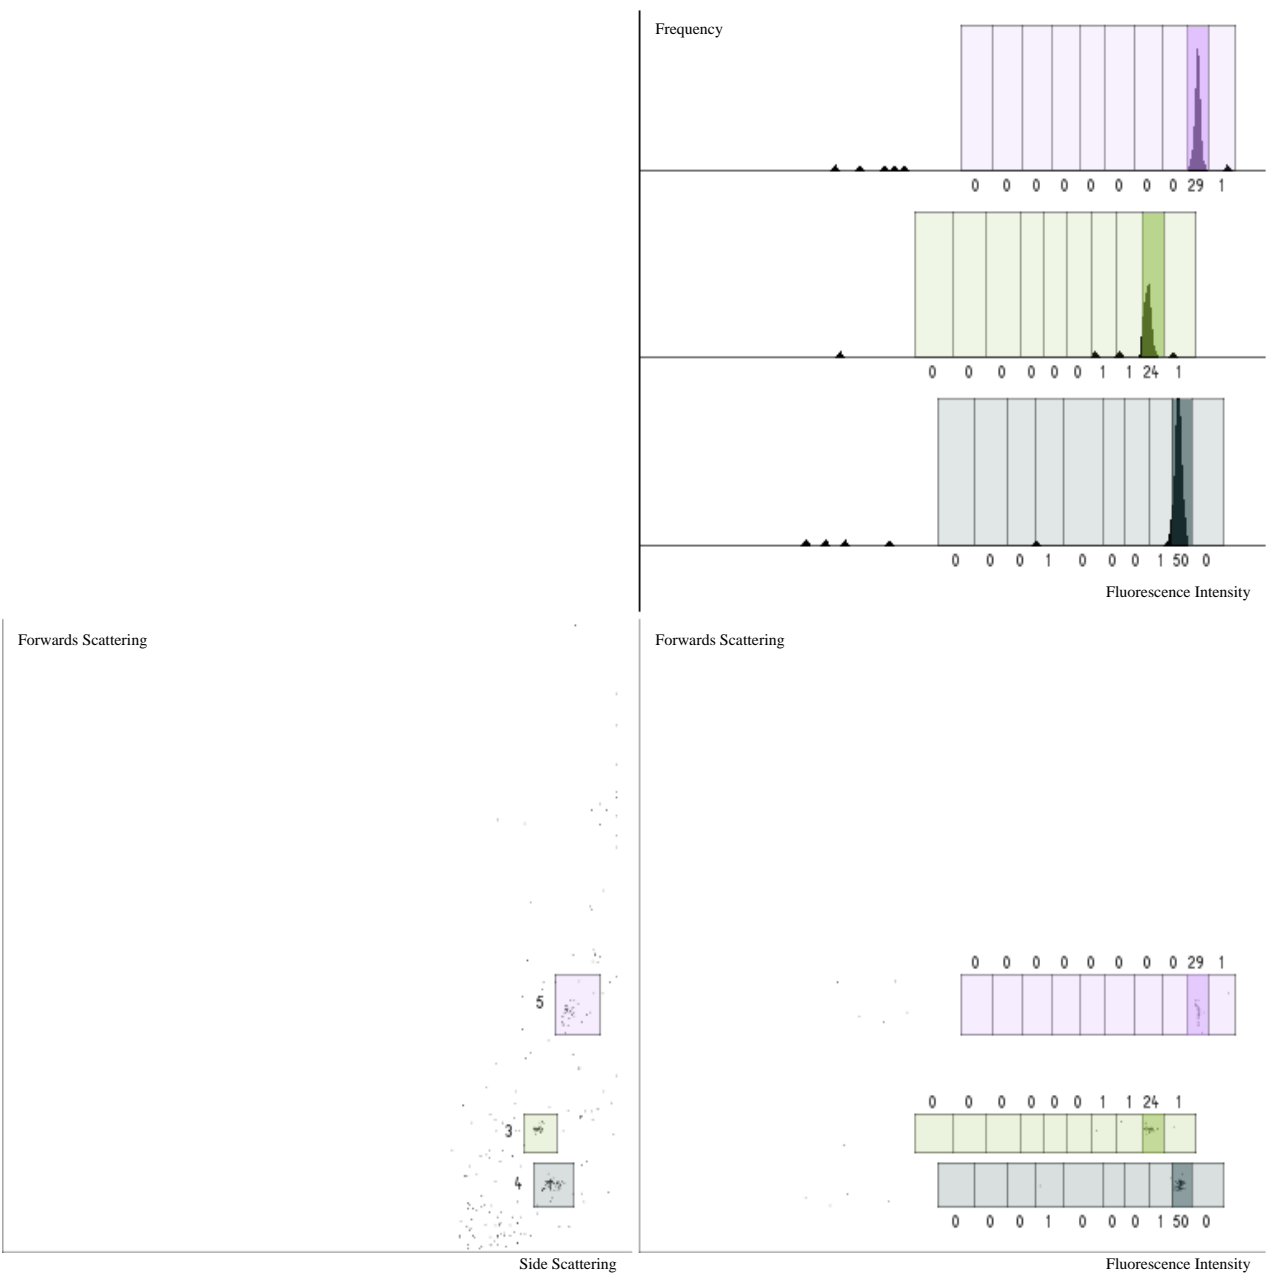



ANNEX 3: TAG DECONVOLUTION - BEAD 423

Passes flow sorting criteria: Yes  
Passes tag deconvolution criteria: Yes  
Included in protocol analysis: Yes  
Protocol: 5, 9, 9, 8  
Filename: Bin8\_plateA0\_G8.fcs  
Split 1: Petrol shading  
Split 2: Green shading  
Split 3: Violet shading

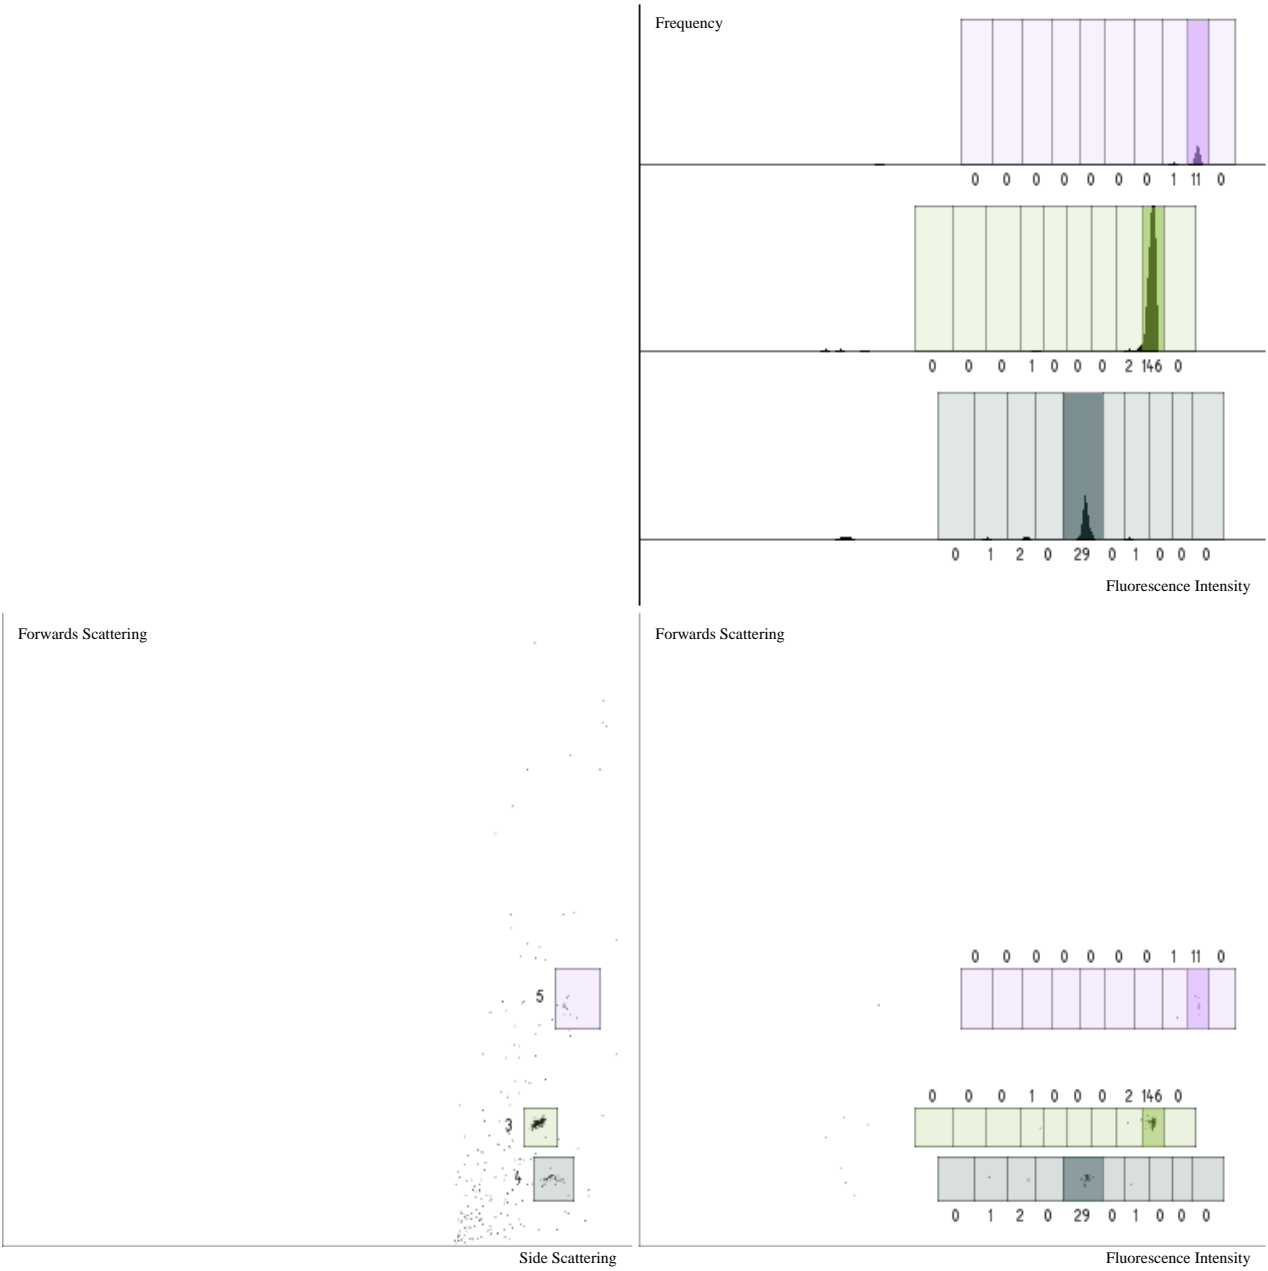

ANNEX 3: TAG DECONVOLUTION - BEAD 424

Passes flow sorting criteria: Yes  
Passes tag deconvolution criteria: Yes  
Included in protocol analysis: Yes  
Protocol: 3, 3, 10, 8  
Filename: Bin8\_plateA0\_G9.fcs  
Split 1: Petrol shading  
Split 2: Green shading  
Split 3: Violet shading

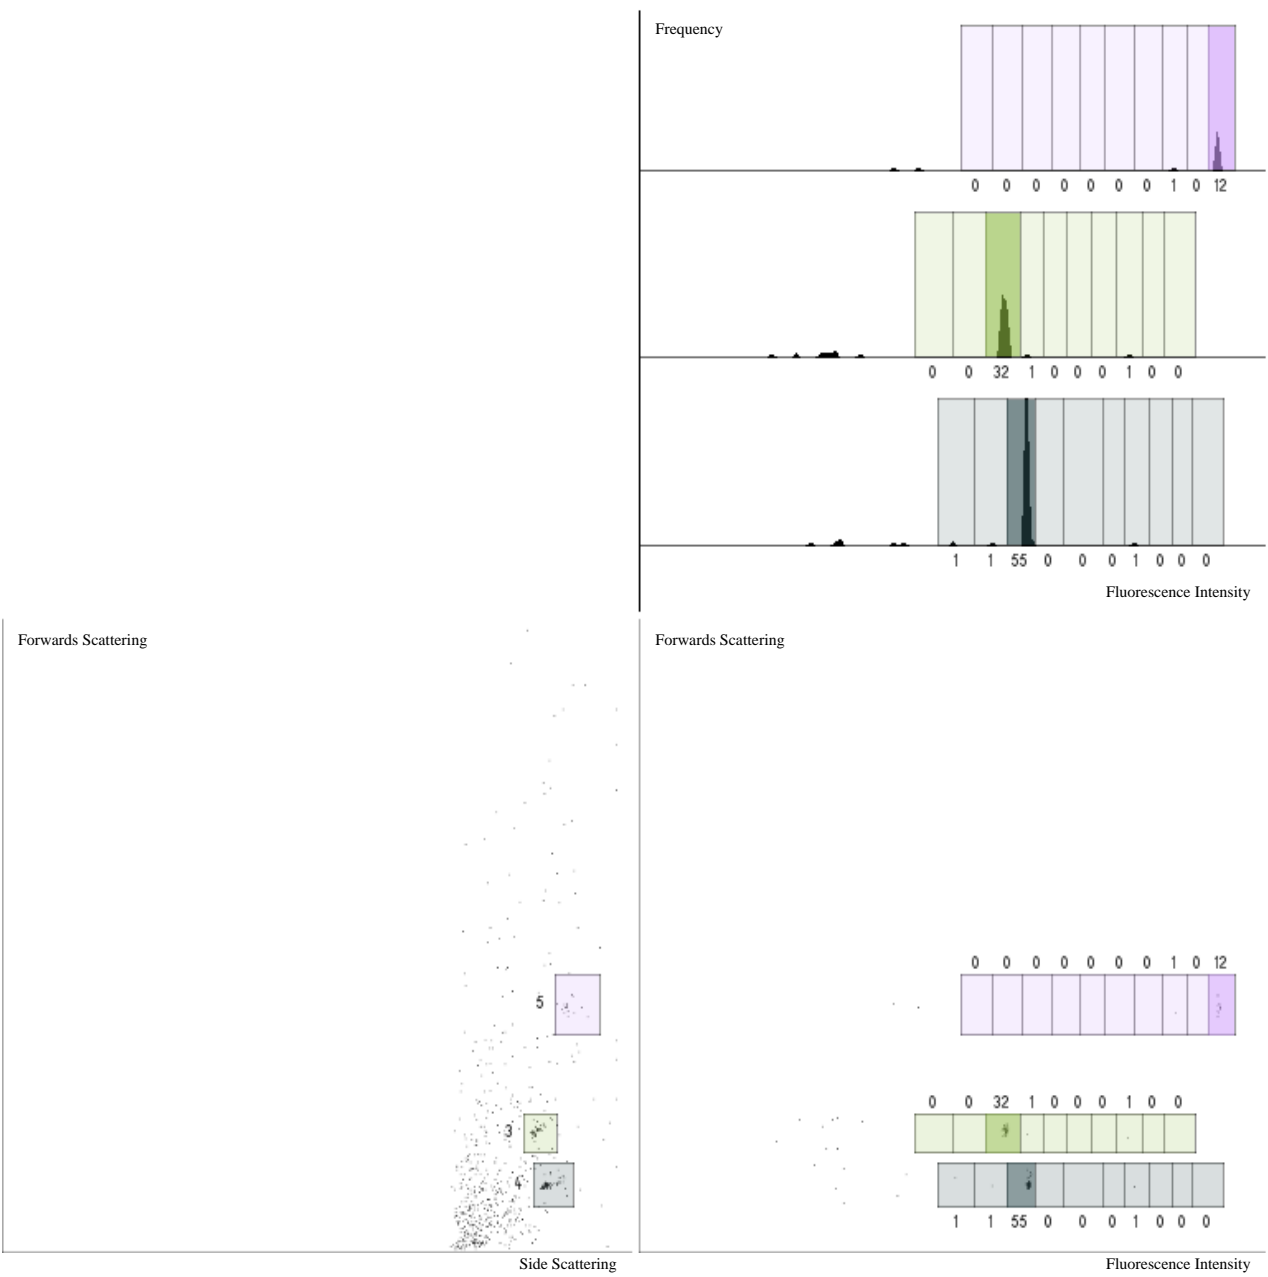

ANNEX 3: TAG DECONVOLUTION - BEAD 425

Passes flow sorting criteria: Yes  
Passes tag deconvolution criteria: Yes  
Included in protocol analysis: Yes  
Protocol: 7, 6, 8, 8  
Filename: Bin8\_plateA0\_G10.fcs  
Split 1: Petrol shading  
Split 2: Green shading  
Split 3: Violet shading

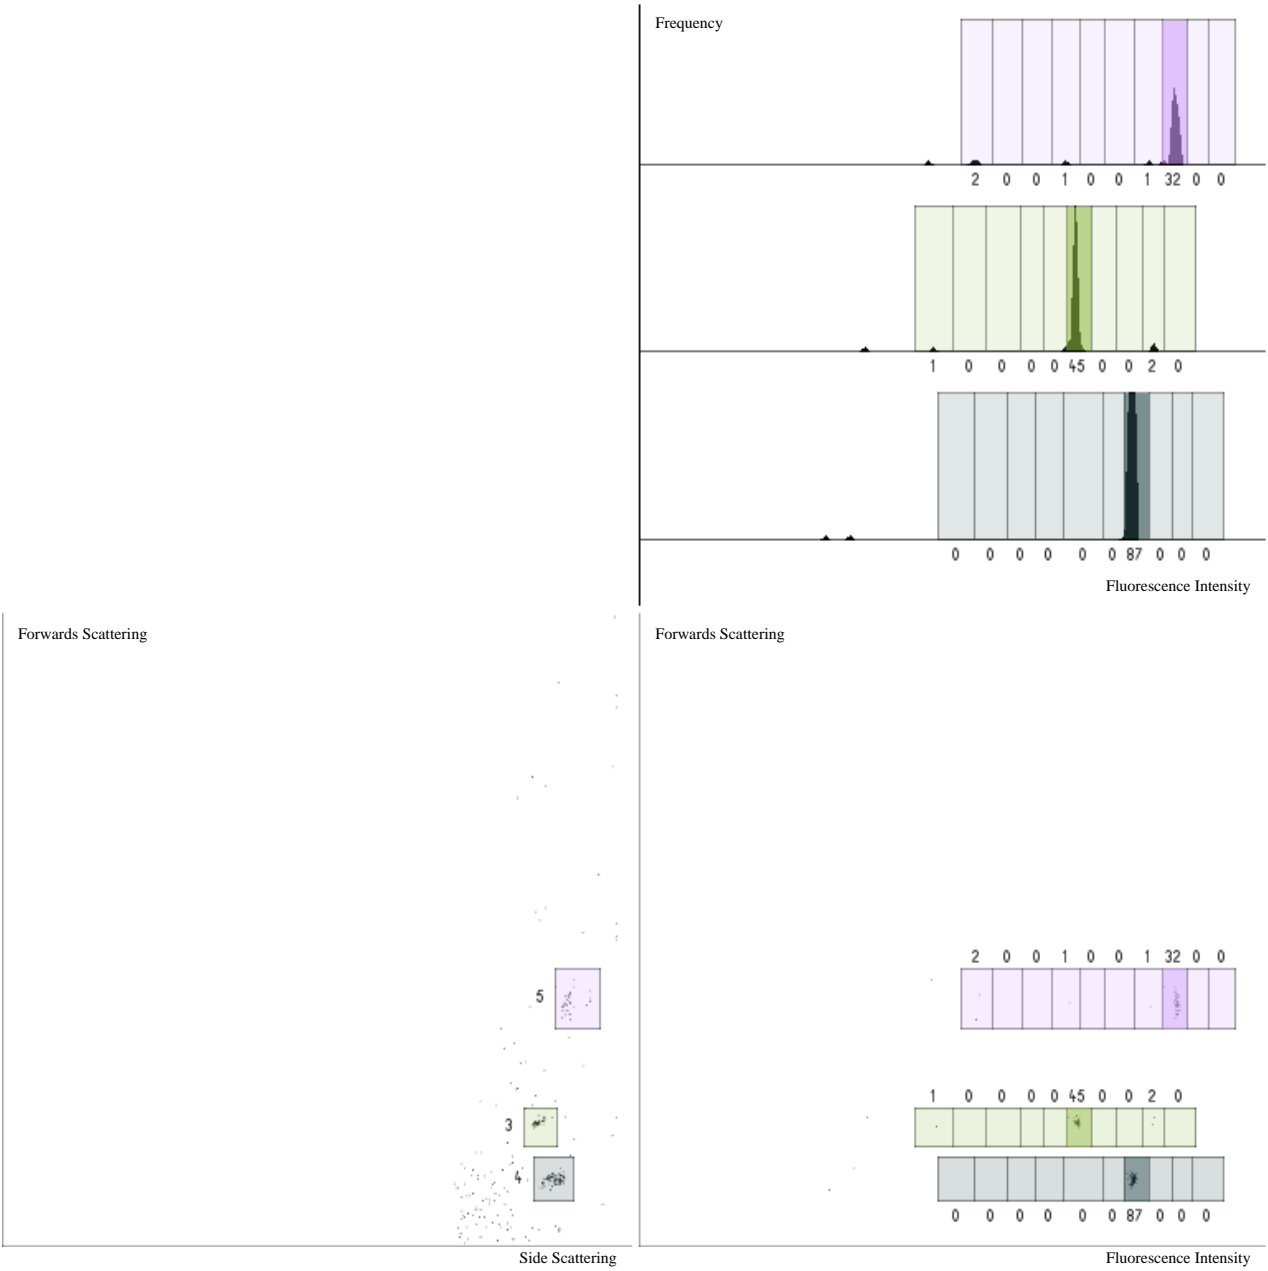

ANNEX 3: TAG DECONVOLUTION - BEAD 426

Passes flow sorting criteria: Yes  
Passes tag deconvolution criteria: No  
Included in protocol analysis: No  
Protocol: N/A  
Filename: Bin8\_plateA0\_G11.fcs  
Split 1: Petrol shading  
Split 2: Green shading  
Split 3: Violet shading

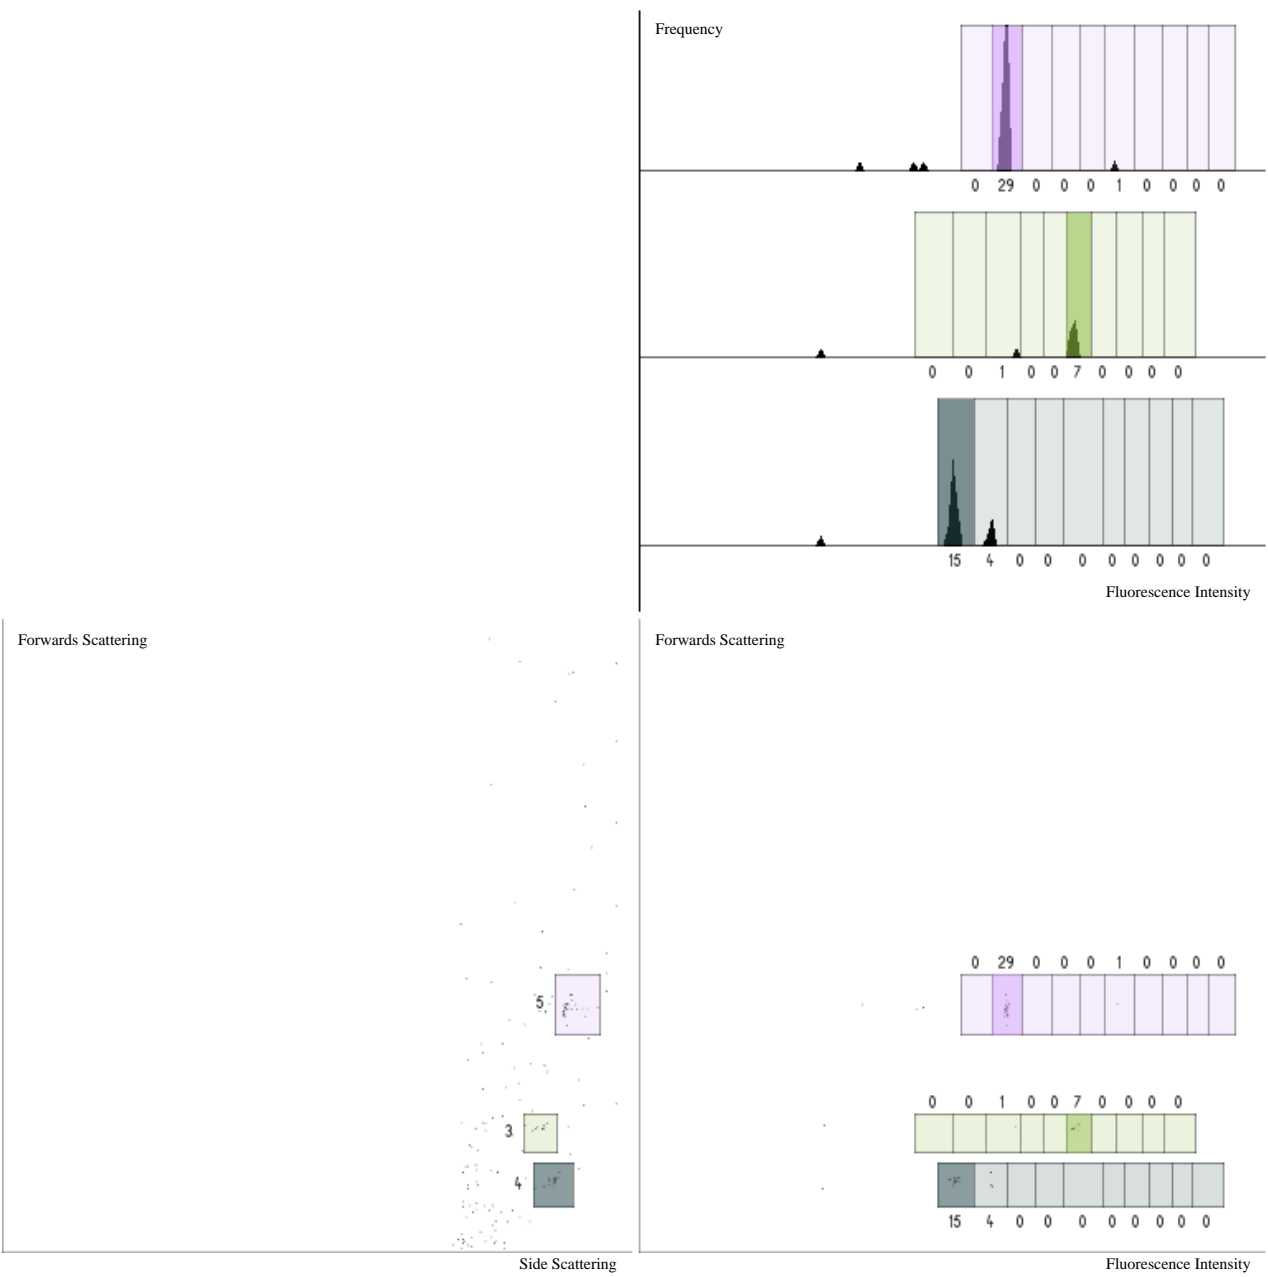

ANNEX 3: TAG DECONVOLUTION - BEAD 427

Passes flow sorting criteria: Yes  
Passes tag deconvolution criteria: Yes  
Included in protocol analysis: Yes  
Protocol: 4, 7, 7, 9  
Filename: Bin9\_plateA0\_D7.fcs  
Split 1: Petrol shading  
Split 2: Green shading  
Split 3: Violet shading

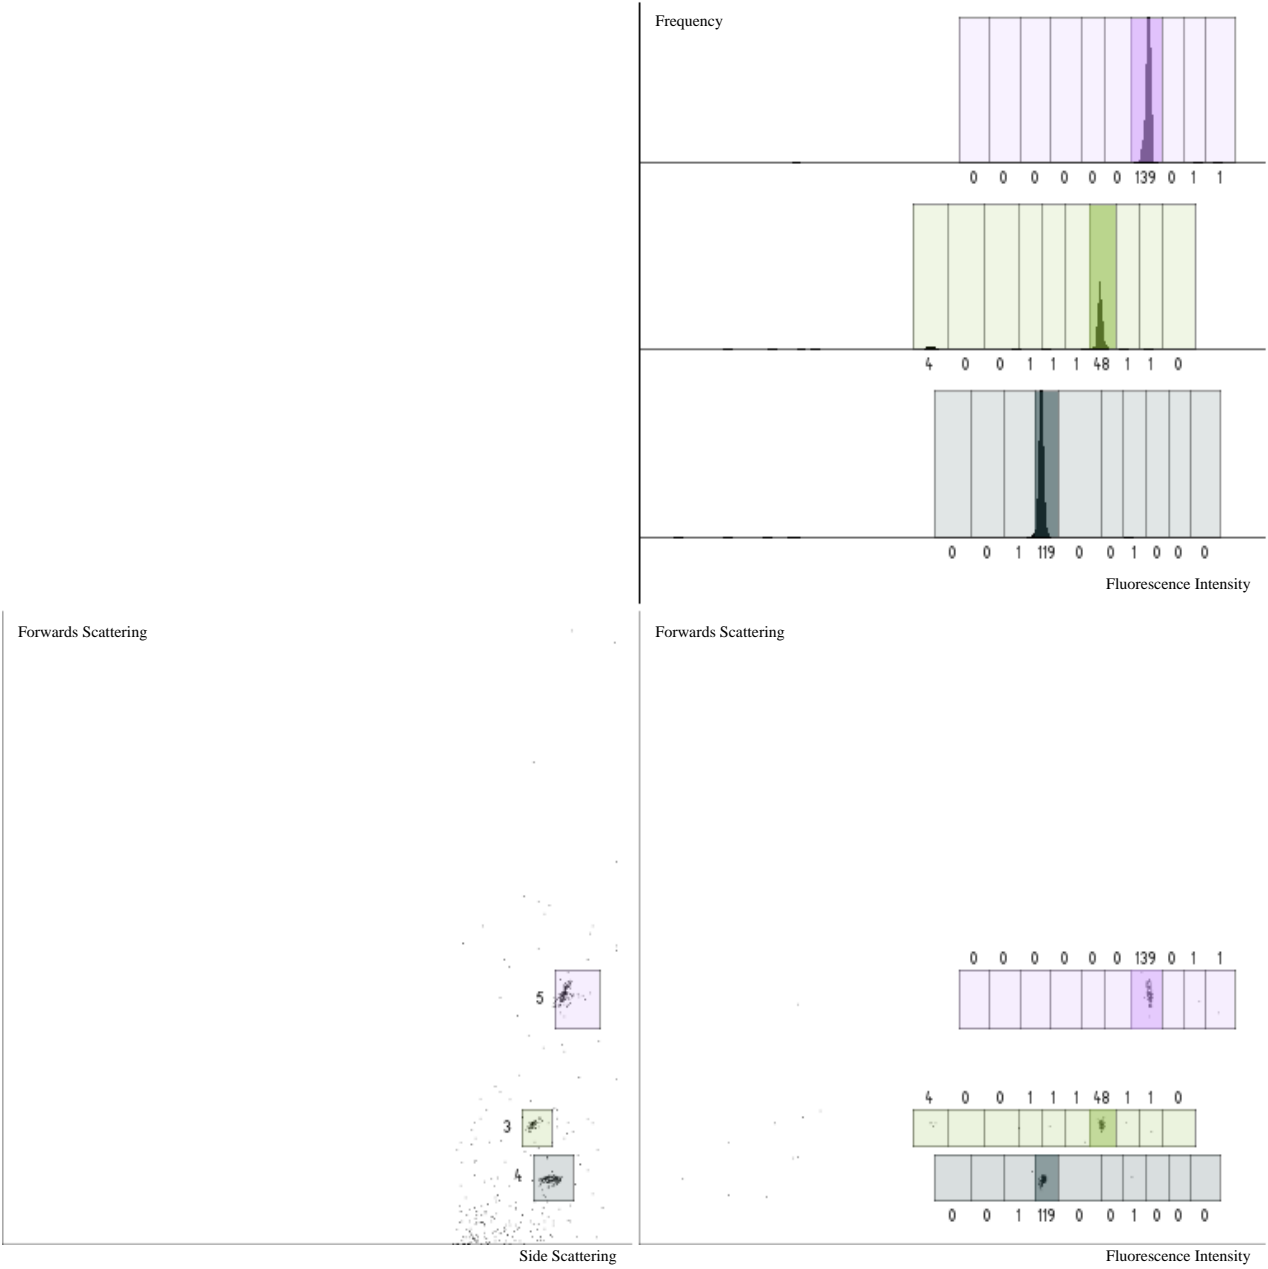

ANNEX 3: TAG DECONVOLUTION - BEAD 428

Passes flow sorting criteria: Yes  
Passes tag deconvolution criteria: Yes  
Included in protocol analysis: Yes  
Protocol: 3, 9, 1, 9  
Filename: Bin9\_plateA0\_A1.fcs  
Split 1: Petrol shading  
Split 2: Green shading  
Split 3: Violet shading

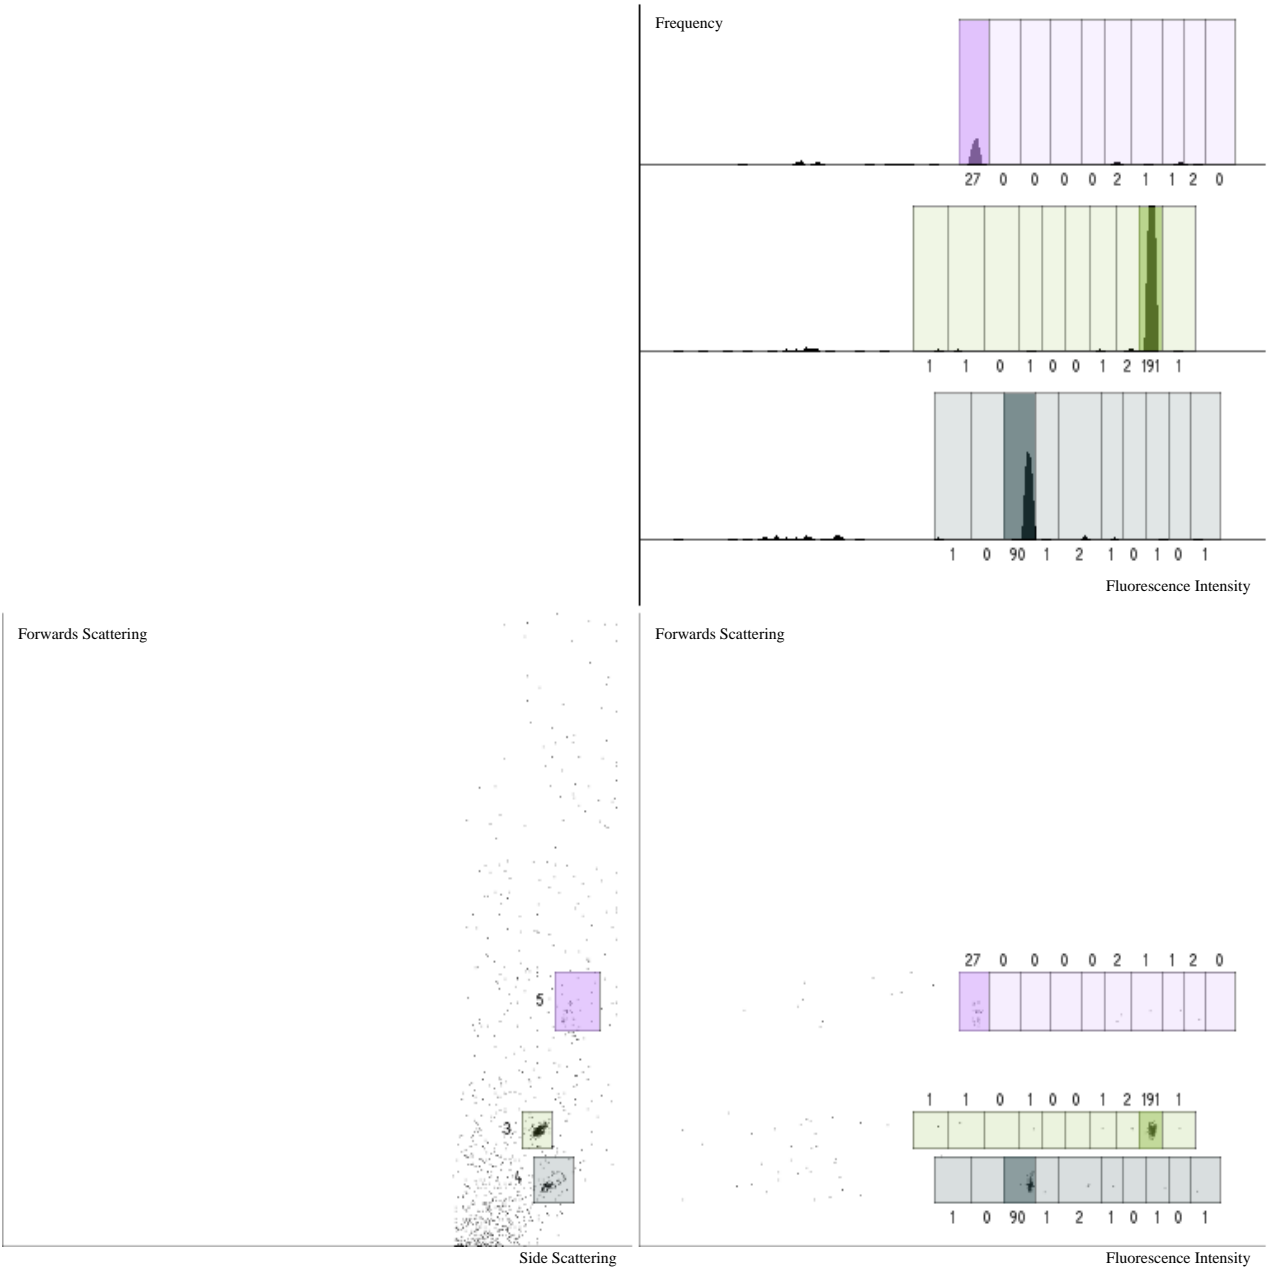

ANNEX 3: TAG DECONVOLUTION - BEAD 429

Passes flow sorting criteria: Yes  
Passes tag deconvolution criteria: Yes  
Included in protocol analysis: Yes  
Protocol: 10, 10, 3, 9  
Filename: Bin9\_plateA0\_A2.fcs  
Split 1: Petrol shading  
Split 2: Green shading  
Split 3: Violet shading

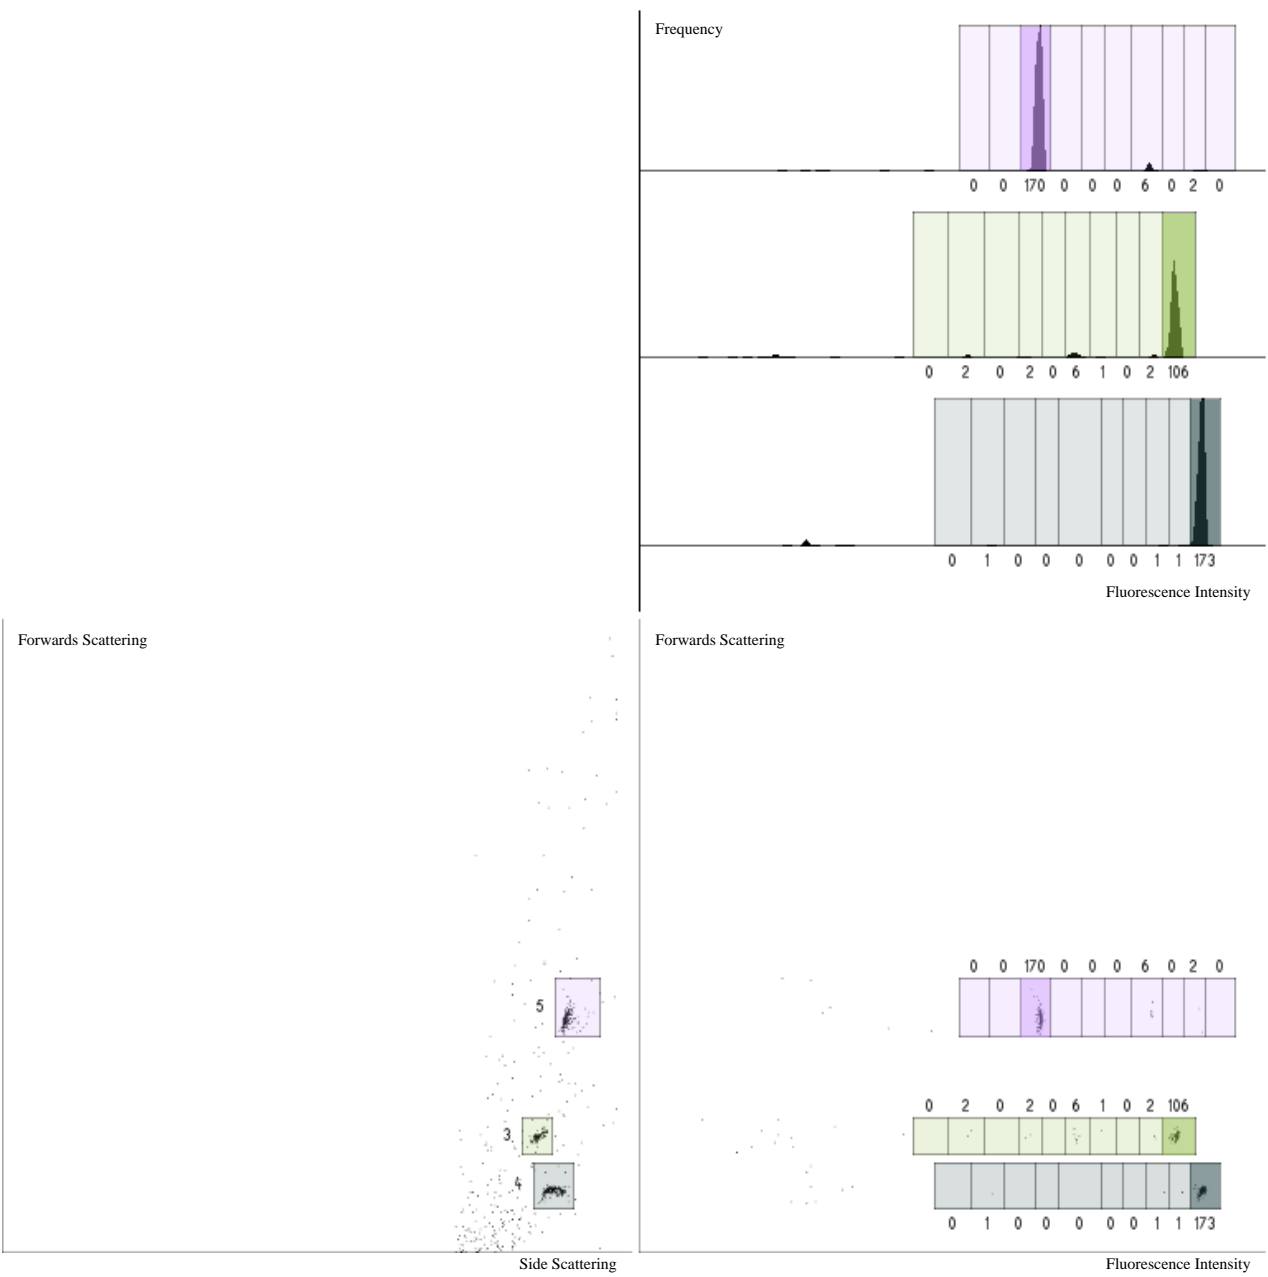

ANNEX 3: TAG DECONVOLUTION - BEAD 430

Passes flow sorting criteria: Yes  
Passes tag deconvolution criteria: Yes  
Included in protocol analysis: Yes  
Protocol: 8, 9, 2, 9  
Filename: Bin9\_plateA0\_A3.fcs  
Split 1: Petrol shading  
Split 2: Green shading  
Split 3: Violet shading

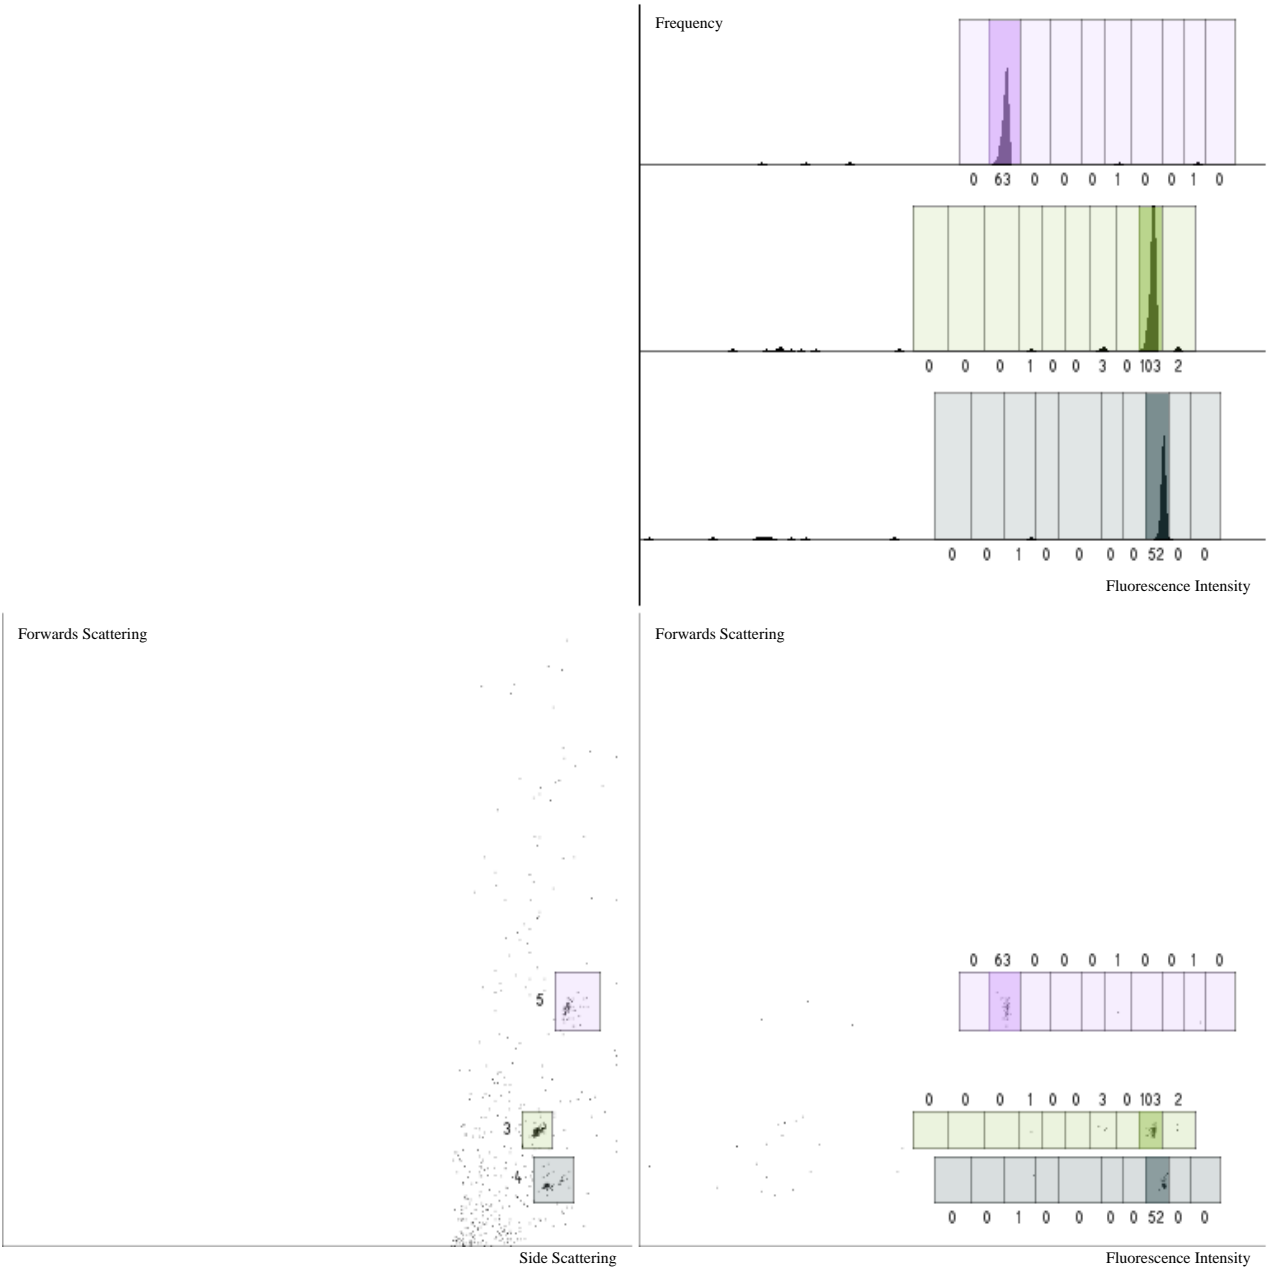



ANNEX 3: TAG DECONVOLUTION - BEAD 431

Passes flow sorting criteria: Yes  
Passes tag deconvolution criteria: Yes  
Included in protocol analysis: Yes  
Protocol: 6, 7, 2, 9  
Filename: Bin9\_plateA0\_A4.fcs  
Split 1: Petrol shading  
Split 2: Green shading  
Split 3: Violet shading

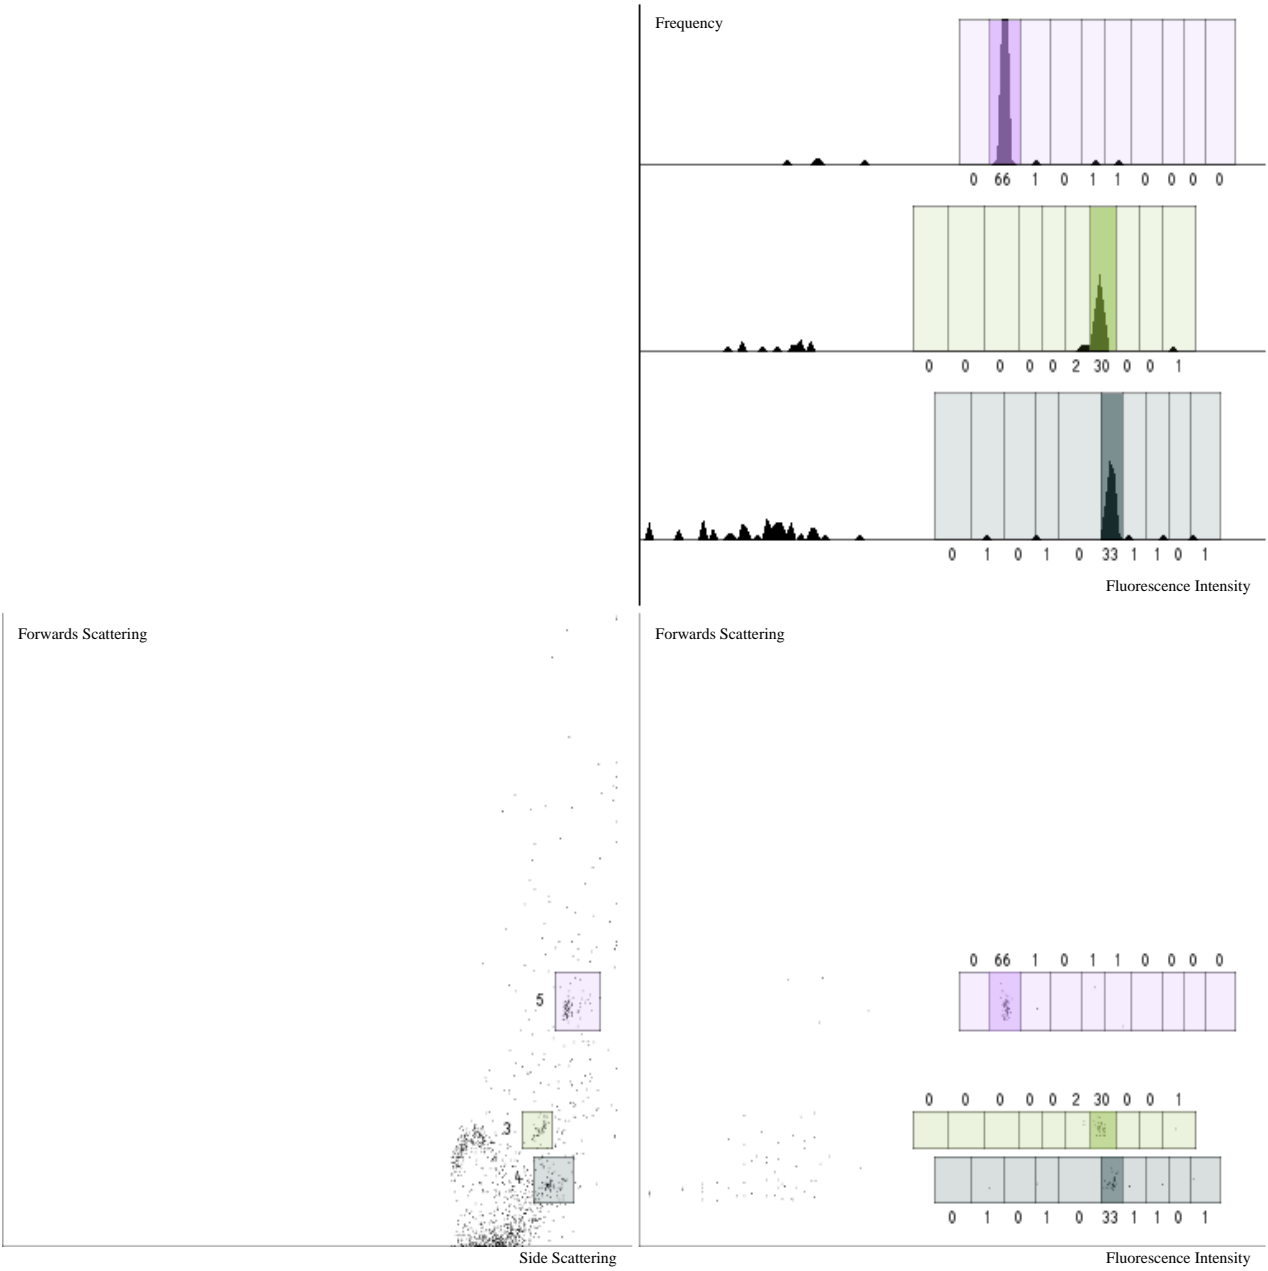

ANNEX 3: TAG DECONVOLUTION - BEAD 432

Passes flow sorting criteria: Yes  
Passes tag deconvolution criteria: Yes  
Included in protocol analysis: Yes  
Protocol: 6, 5, 1, 9  
Filename: Bin9\_plateA0\_A5.fcs  
Split 1: Petrol shading  
Split 2: Green shading  
Split 3: Violet shading

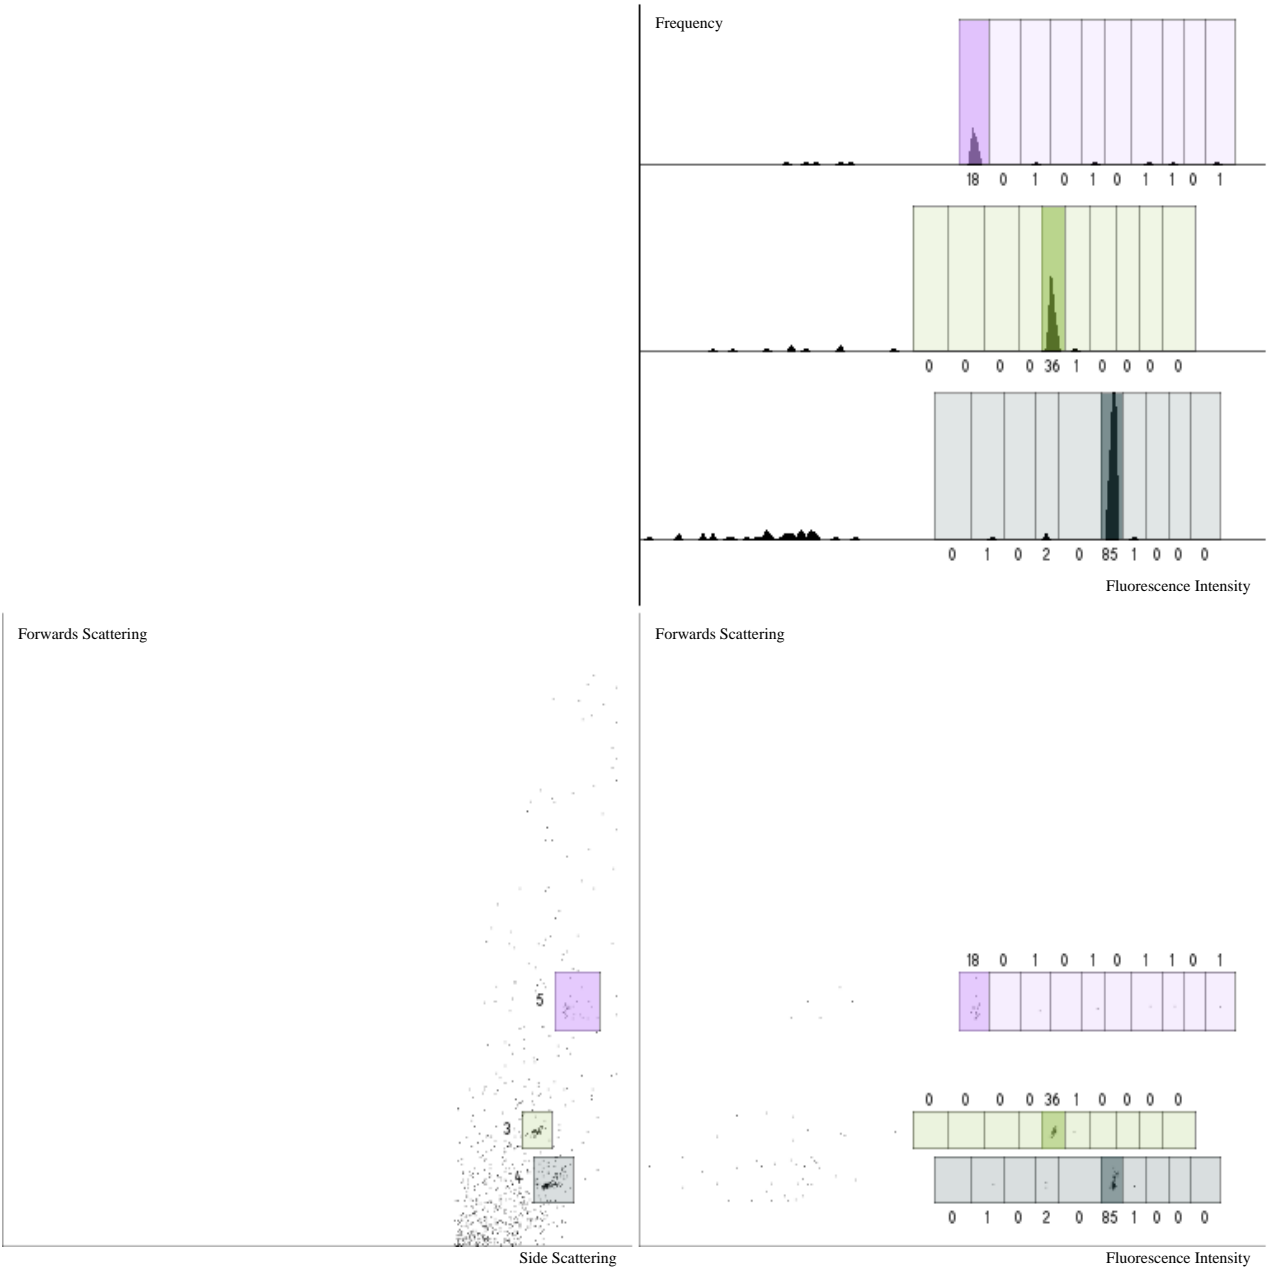

ANNEX 3: TAG DECONVOLUTION - BEAD 433

Passes flow sorting criteria: Yes  
Passes tag deconvolution criteria: Yes  
Included in protocol analysis: Yes  
Protocol: 1, 1, 9, 9  
Filename: Bin9\_plateA0\_A6.fcs  
Split 1: Petrol shading  
Split 2: Green shading  
Split 3: Violet shading

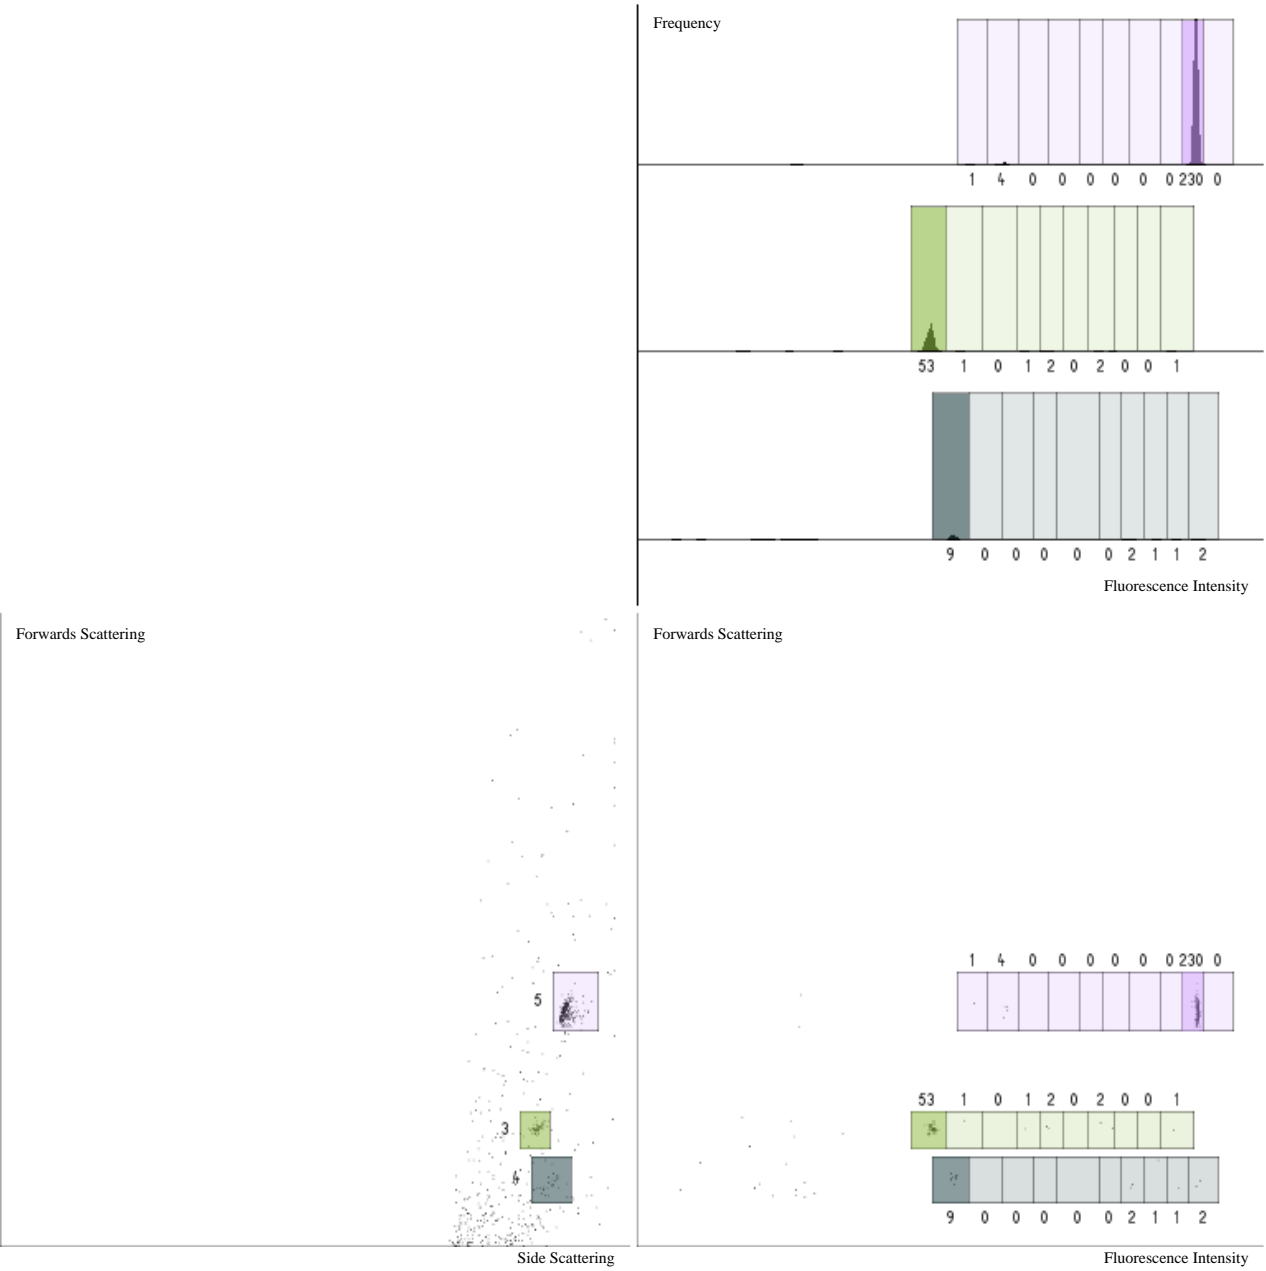

ANNEX 3: TAG DECONVOLUTION - BEAD 434

Passes flow sorting criteria: Yes  
Passes tag deconvolution criteria: Yes  
Included in protocol analysis: Yes  
Protocol: 4, 8, 3, 9  
Filename: Bin9\_plateA0\_A7.fcs  
Split 1: Petrol shading  
Split 2: Green shading  
Split 3: Violet shading

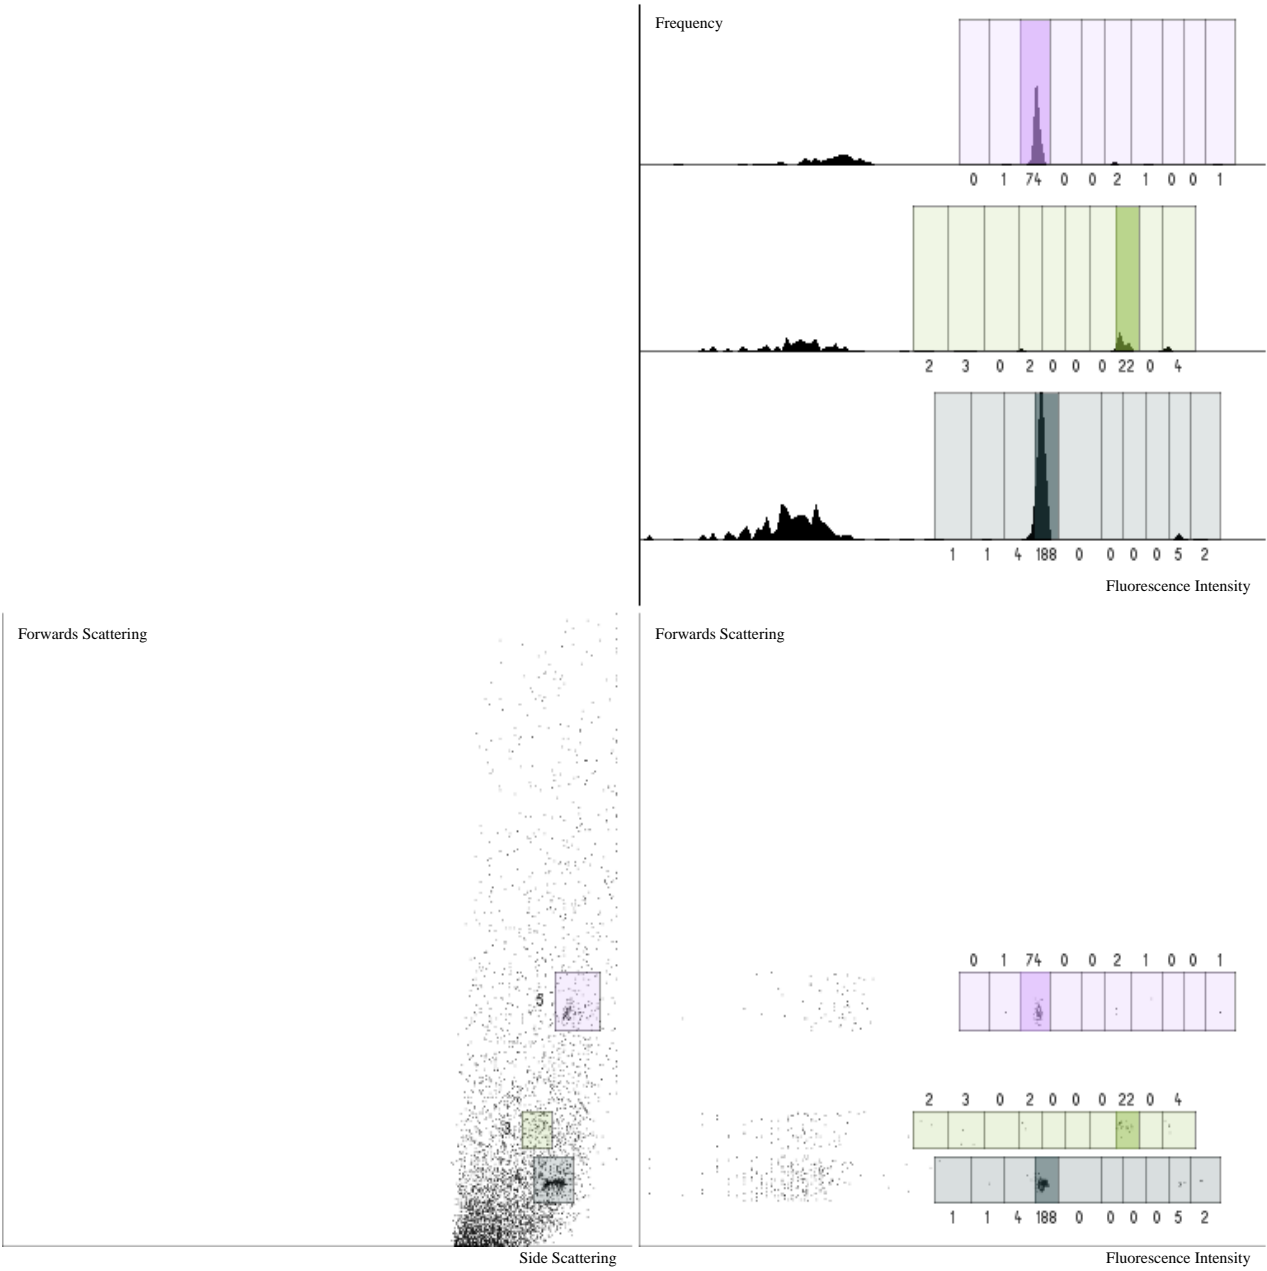

ANNEX 3: TAG DECONVOLUTION - BEAD 435

Passes flow sorting criteria: Yes  
Passes tag deconvolution criteria: Yes  
Included in protocol analysis: Yes  
Protocol: 6, 6, 6, 9  
Filename: Bin9\_plateA0\_A8.fcs  
Split 1: Petrol shading  
Split 2: Green shading  
Split 3: Violet shading

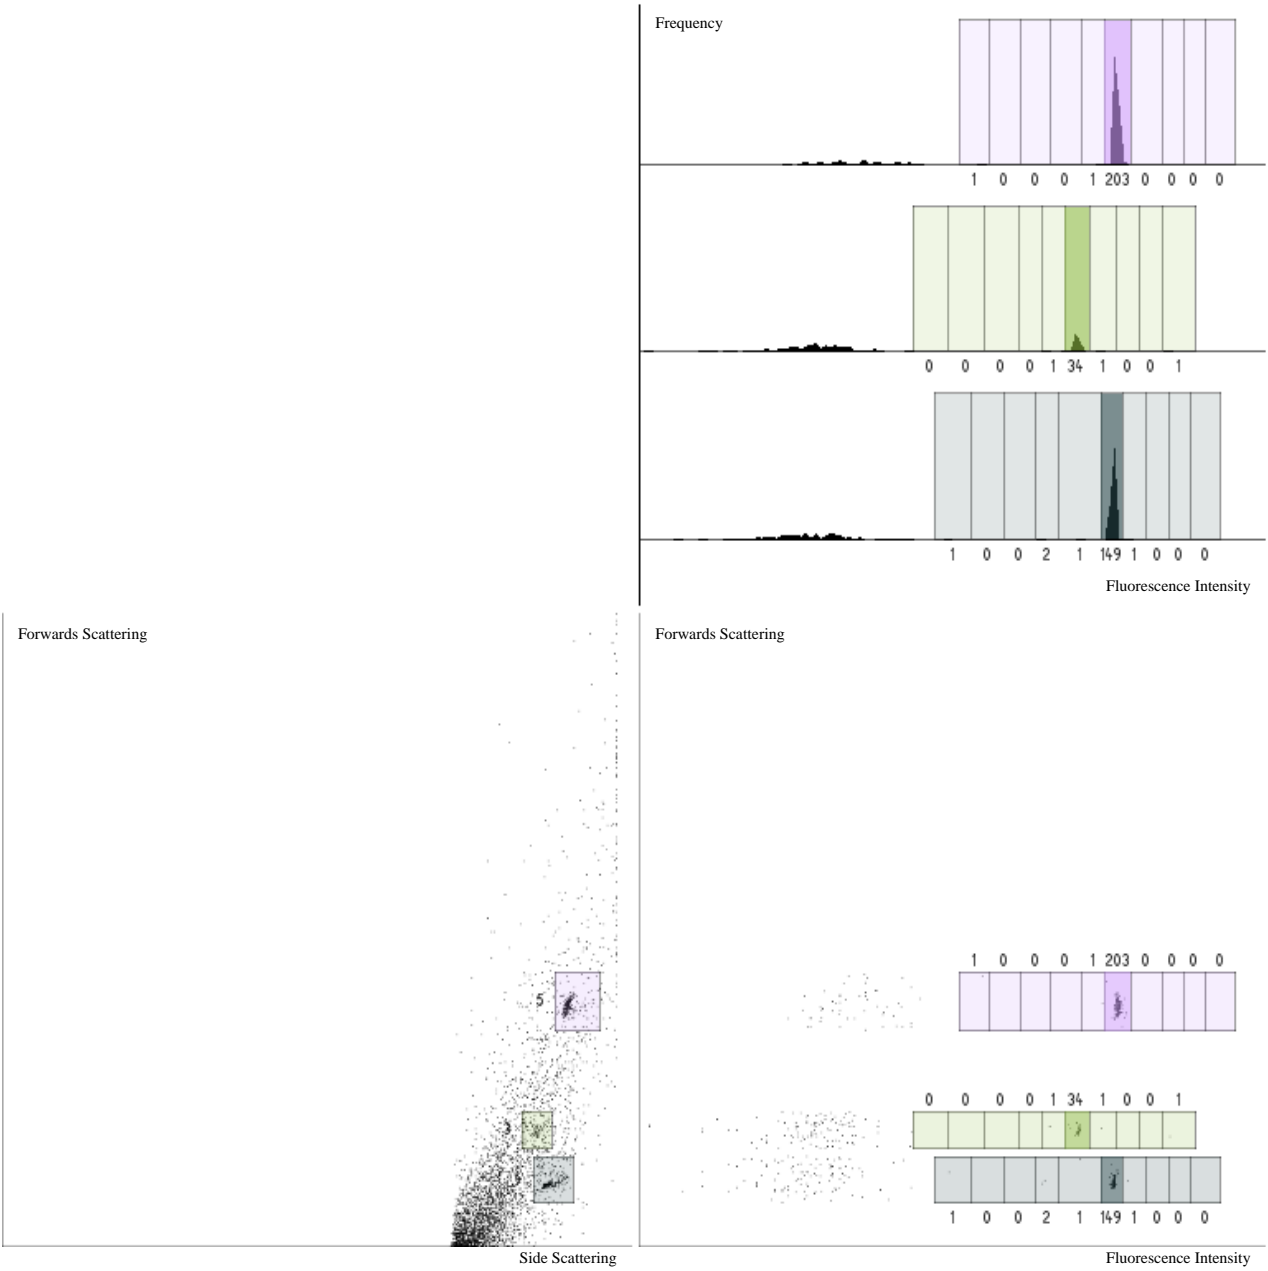

ANNEX 3: TAG DECONVOLUTION - BEAD 436

Passes flow sorting criteria: Yes  
Passes tag deconvolution criteria: Yes  
Included in protocol analysis: Yes  
Protocol: 5, 6, 9, 9  
Filename: Bin9\_plateA0\_A9.fcs  
Split 1: Petrol shading  
Split 2: Green shading  
Split 3: Violet shading

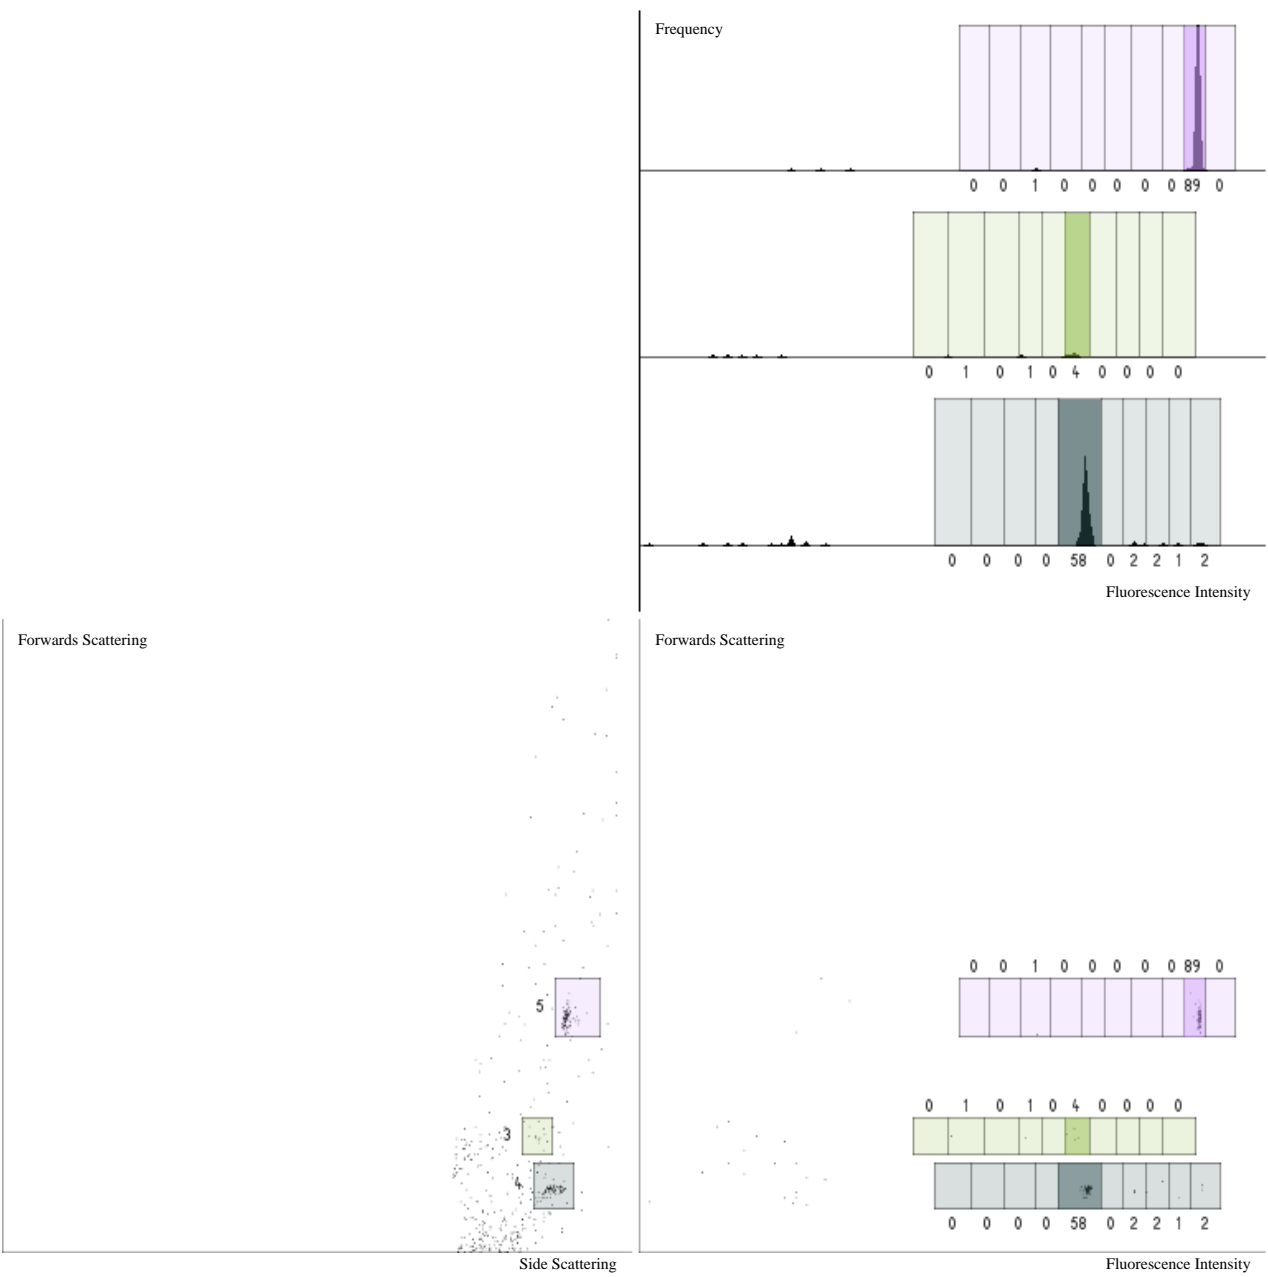

ANNEX 3: TAG DECONVOLUTION - BEAD 437

Passes flow sorting criteria: Yes  
Passes tag deconvolution criteria: Yes  
Included in protocol analysis: Yes  
Protocol: 4, 9, 10, 9  
Filename: Bin9\_plateA0\_A10.fcs  
Split 1: Petrol shading  
Split 2: Green shading  
Split 3: Violet shading

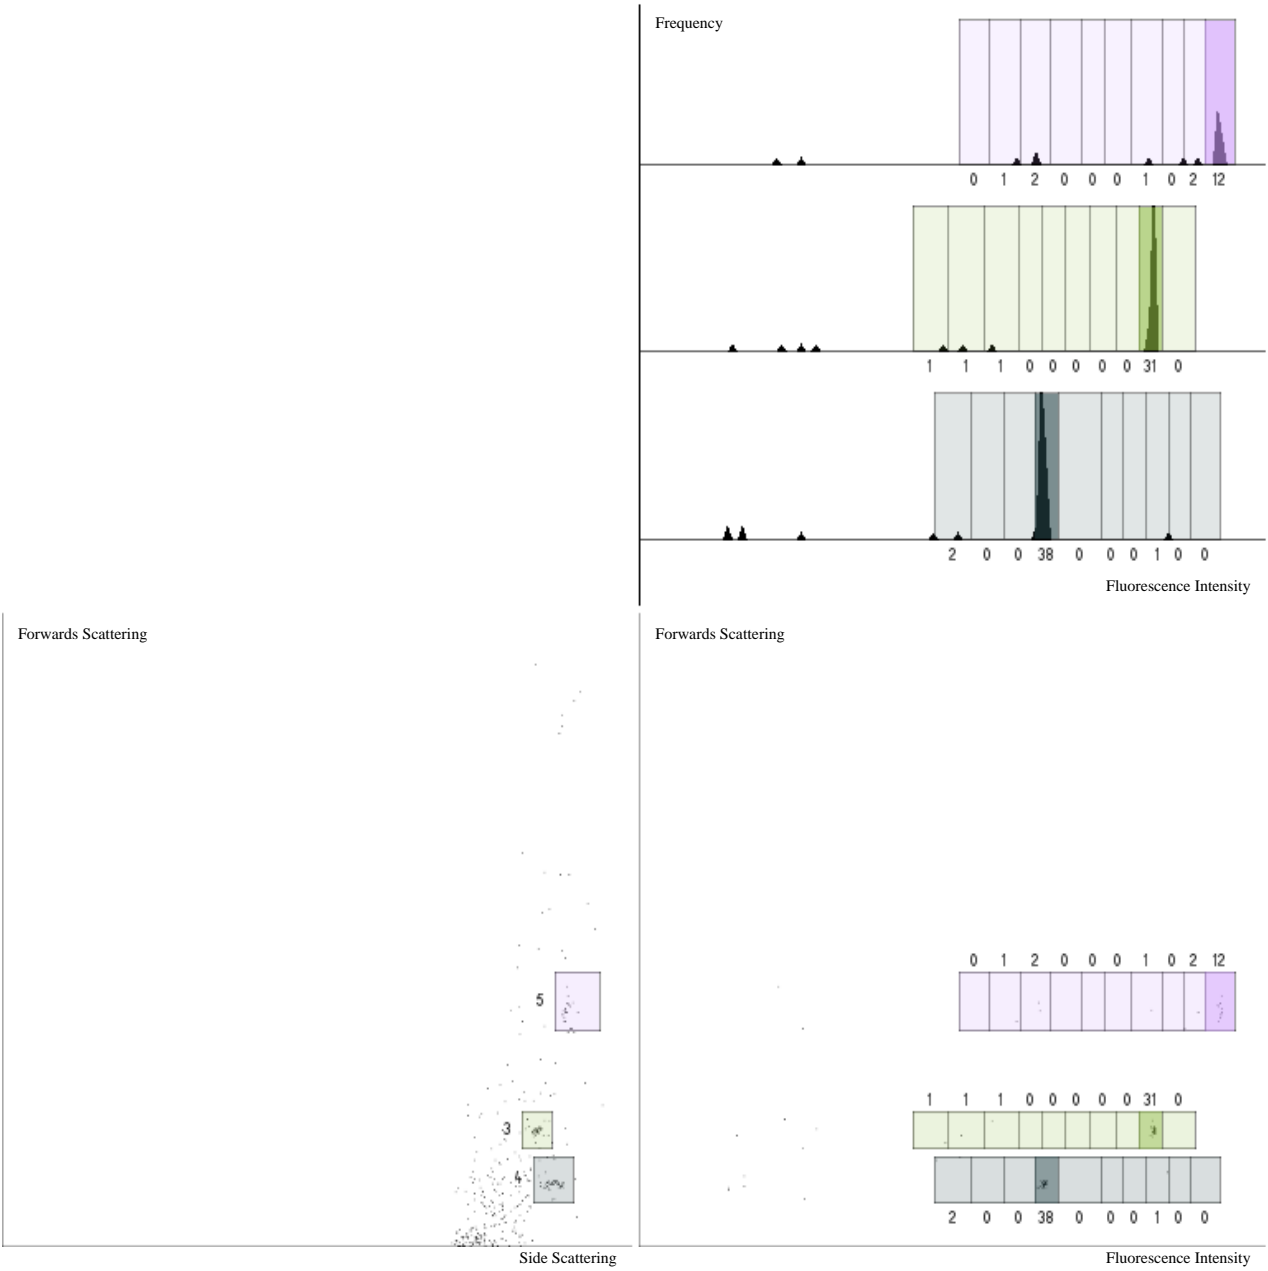

ANNEX 3: TAG DECONVOLUTION - BEAD 438

Passes flow sorting criteria: Yes  
Passes tag deconvolution criteria: Yes  
Included in protocol analysis: Yes  
Protocol: 7, 9, 2, 9  
Filename: Bin9\_plateA0\_A11.fcs  
Split 1: Petrol shading  
Split 2: Green shading  
Split 3: Violet shading

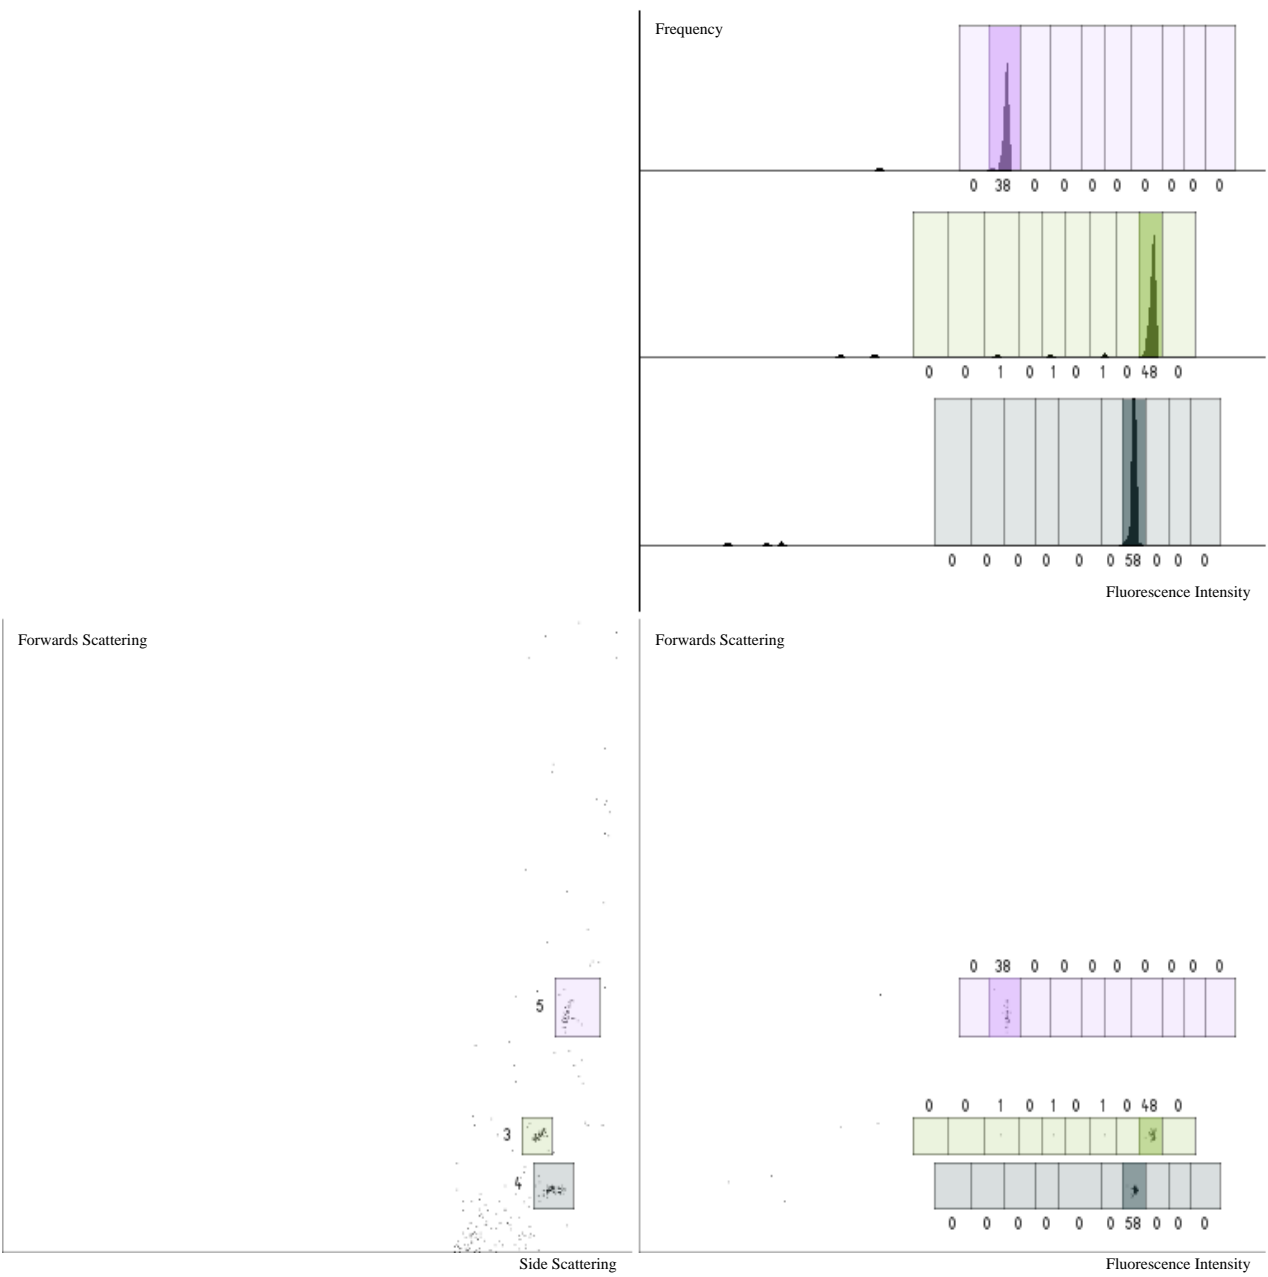



ANNEX 3: TAG DECONVOLUTION - BEAD 439

Passes flow sorting criteria: Yes  
Passes tag deconvolution criteria: No  
Included in protocol analysis: No  
Protocol: N/A  
Filename: Bin9\_plateA0\_B1.fcs  
Split 1: Petrol shading  
Split 2: Green shading  
Split 3: Violet shading

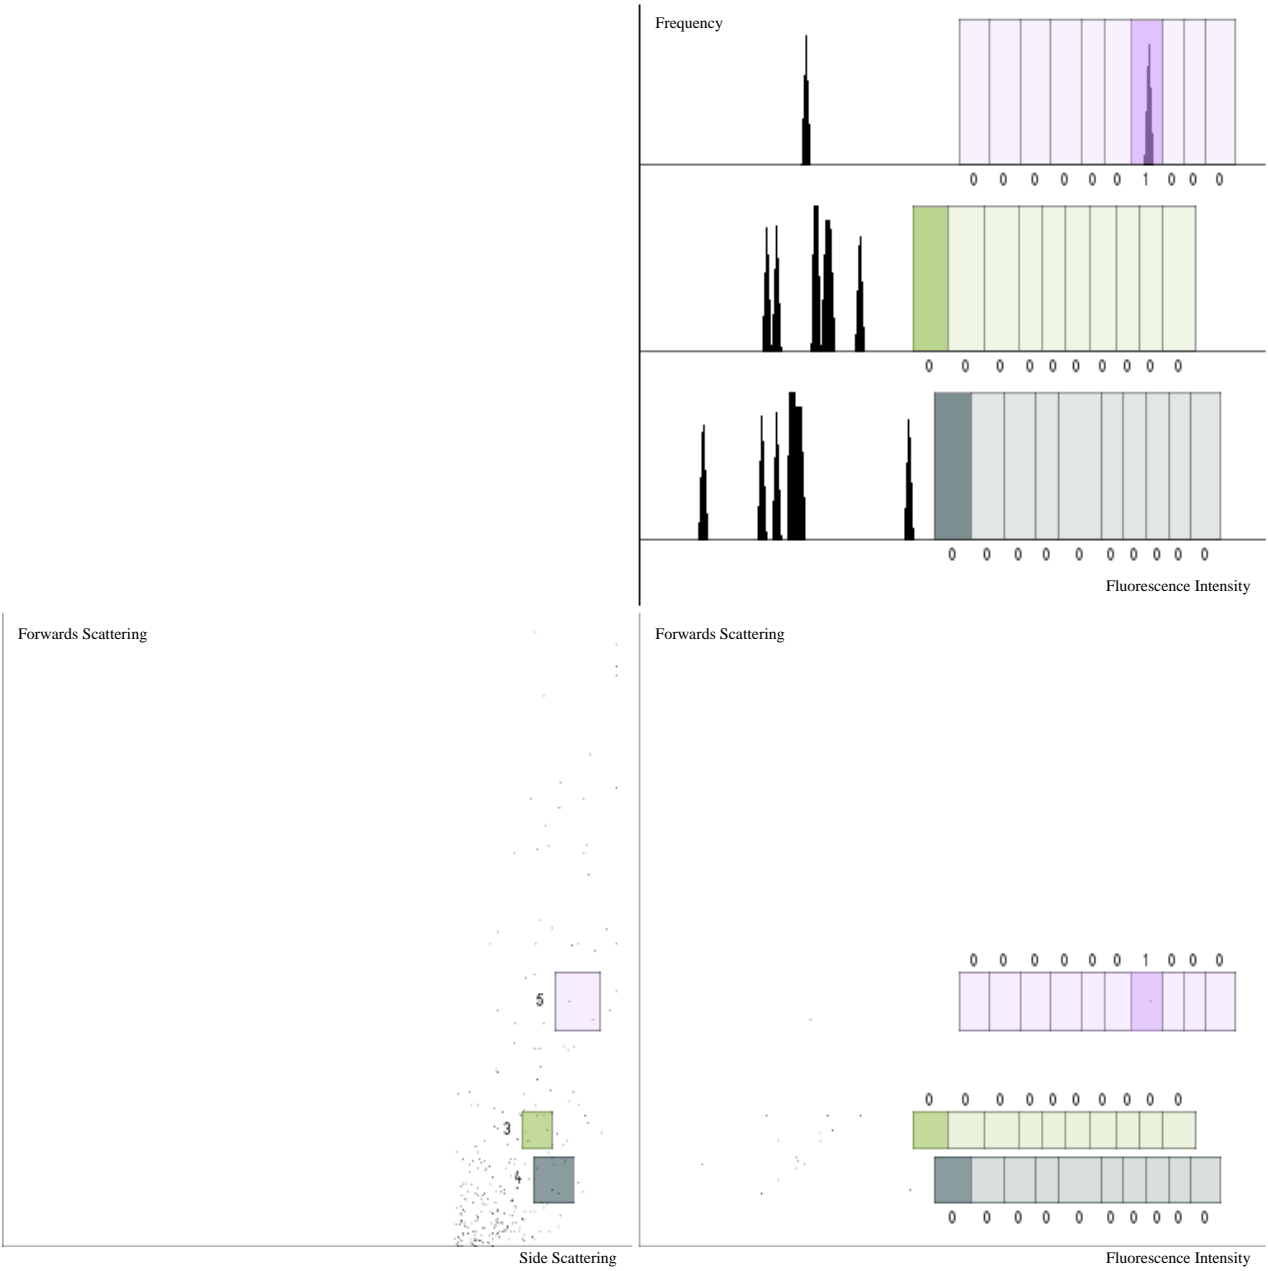

ANNEX 3: TAG DECONVOLUTION - BEAD 440

Passes flow sorting criteria: Yes  
Passes tag deconvolution criteria: No  
Included in protocol analysis: No  
Protocol: N/A  
Filename: Bin9\_plateA0\_B2.fcs  
Split 1: Petrol shading  
Split 2: Green shading  
Split 3: Violet shading

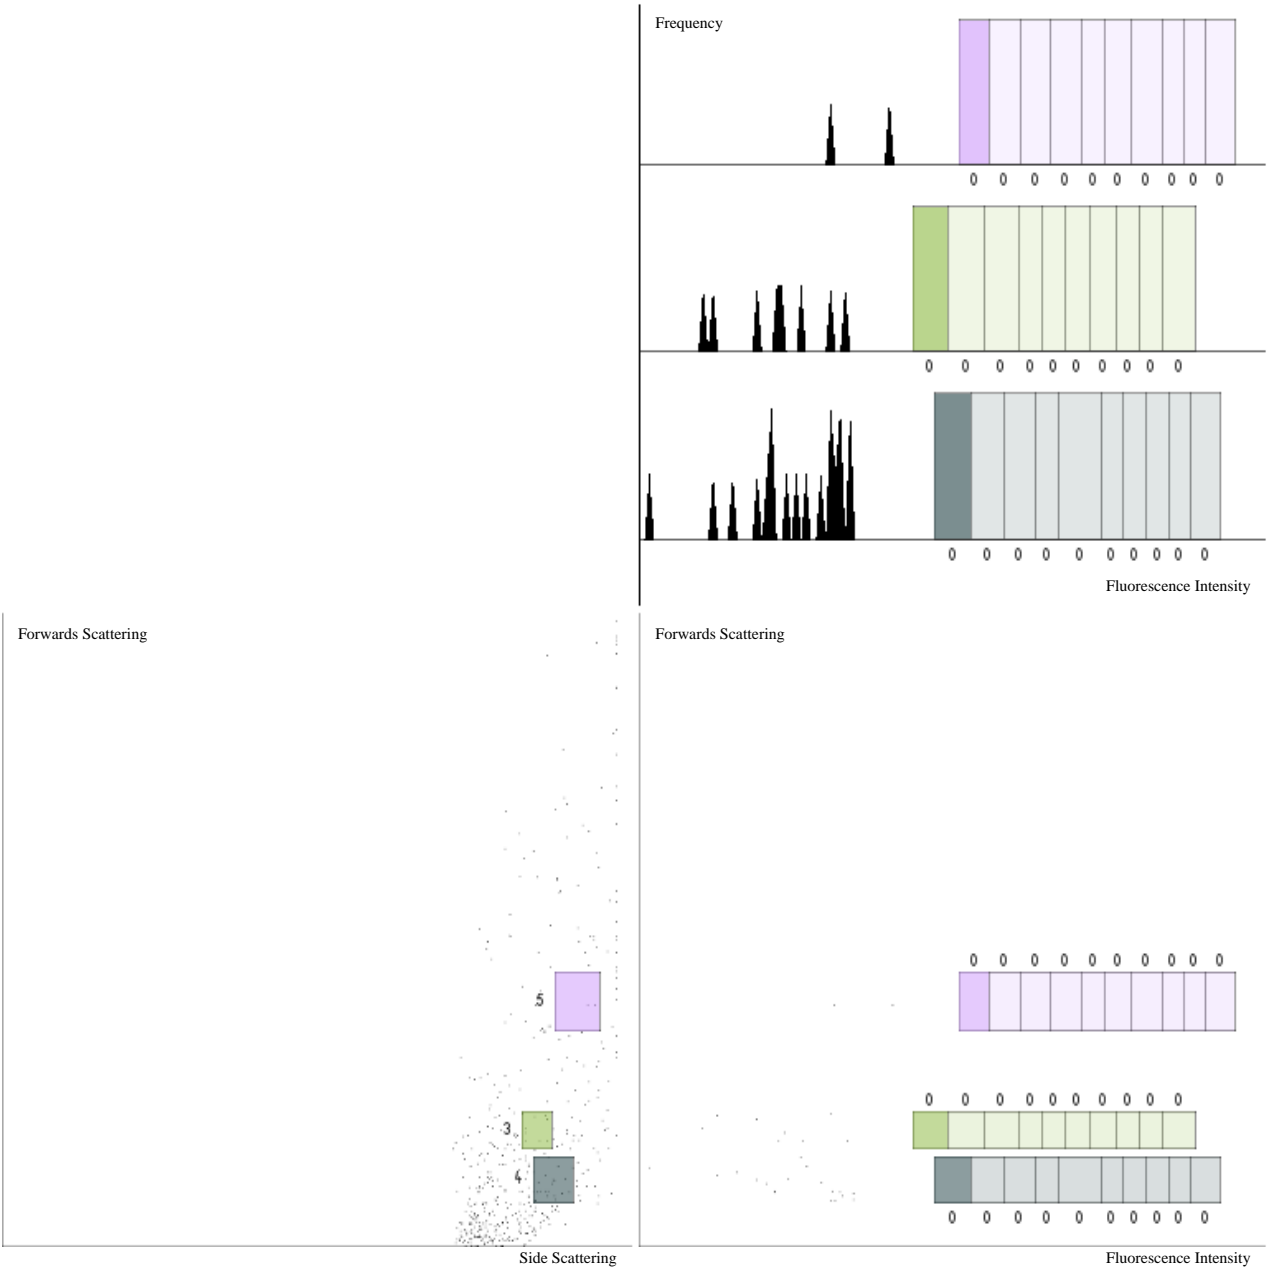

ANNEX 3: TAG DECONVOLUTION - BEAD 441

Passes flow sorting criteria: Yes  
Passes tag deconvolution criteria: Yes  
Included in protocol analysis: Yes  
Protocol: 3, 10, 9, 9  
Filename: Bin9\_plateA0\_B3.fcs  
Split 1: Petrol shading  
Split 2: Green shading  
Split 3: Violet shading

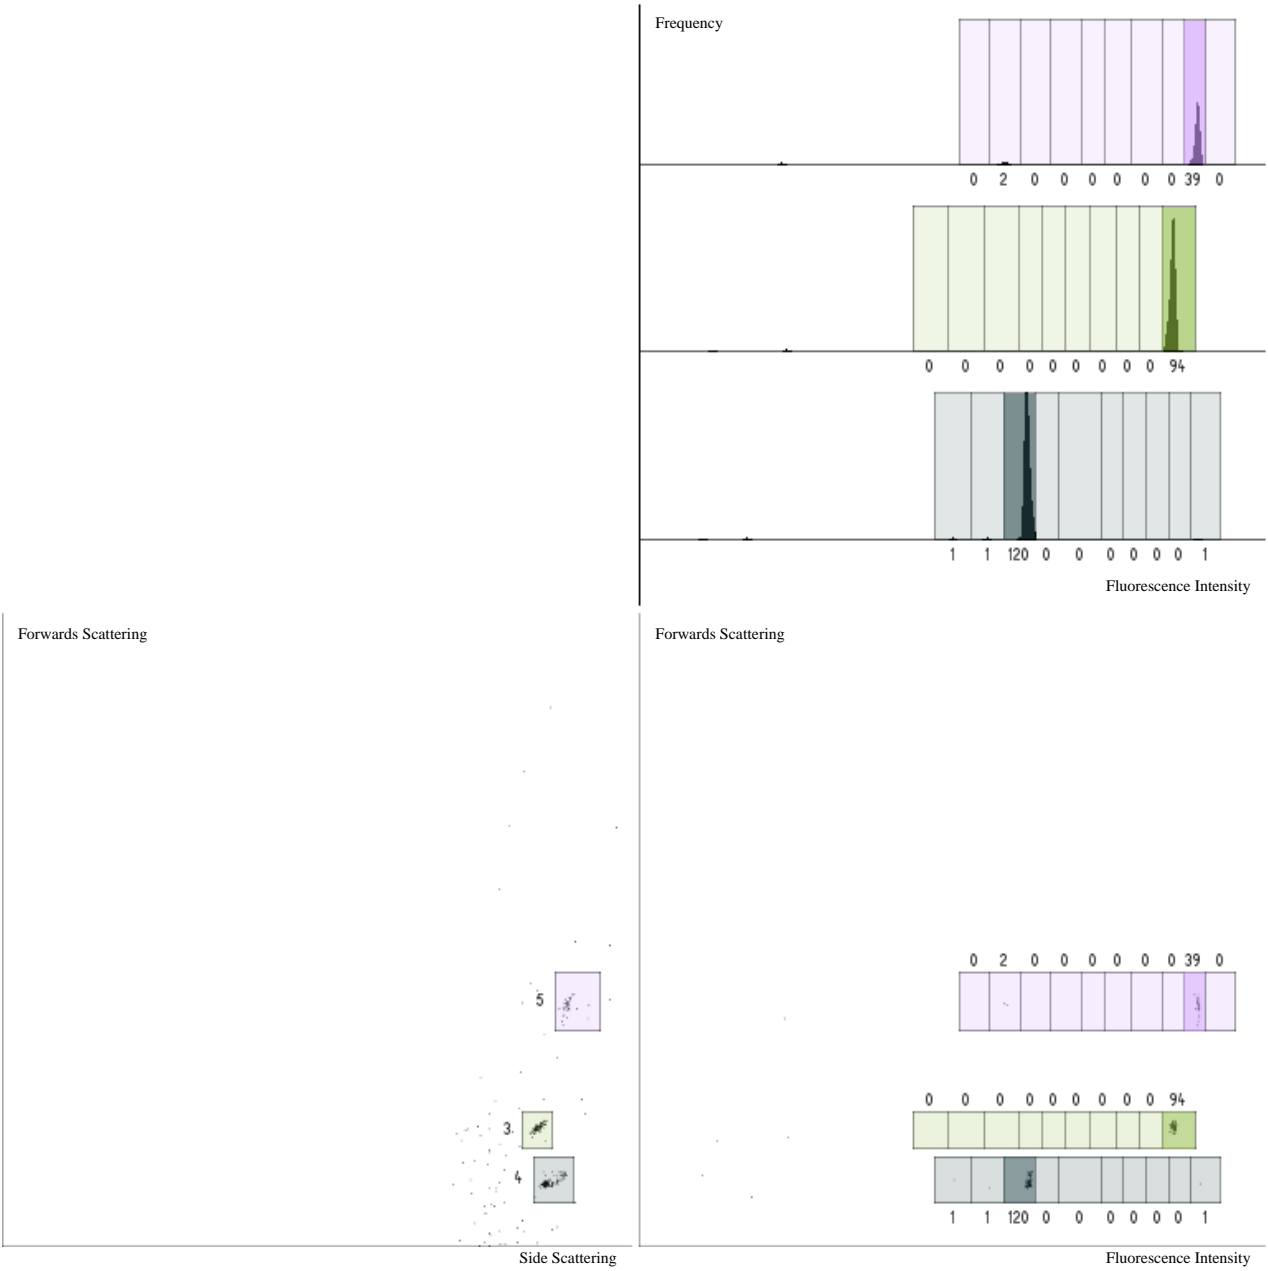

ANNEX 3: TAG DECONVOLUTION - BEAD 442

Passes flow sorting criteria: Yes  
Passes tag deconvolution criteria: Yes  
Included in protocol analysis: Yes  
Protocol: 2, 4, 2, 9  
Filename: Bin9\_plateA0\_B4.fcs  
Split 1: Petrol shading  
Split 2: Green shading  
Split 3: Violet shading

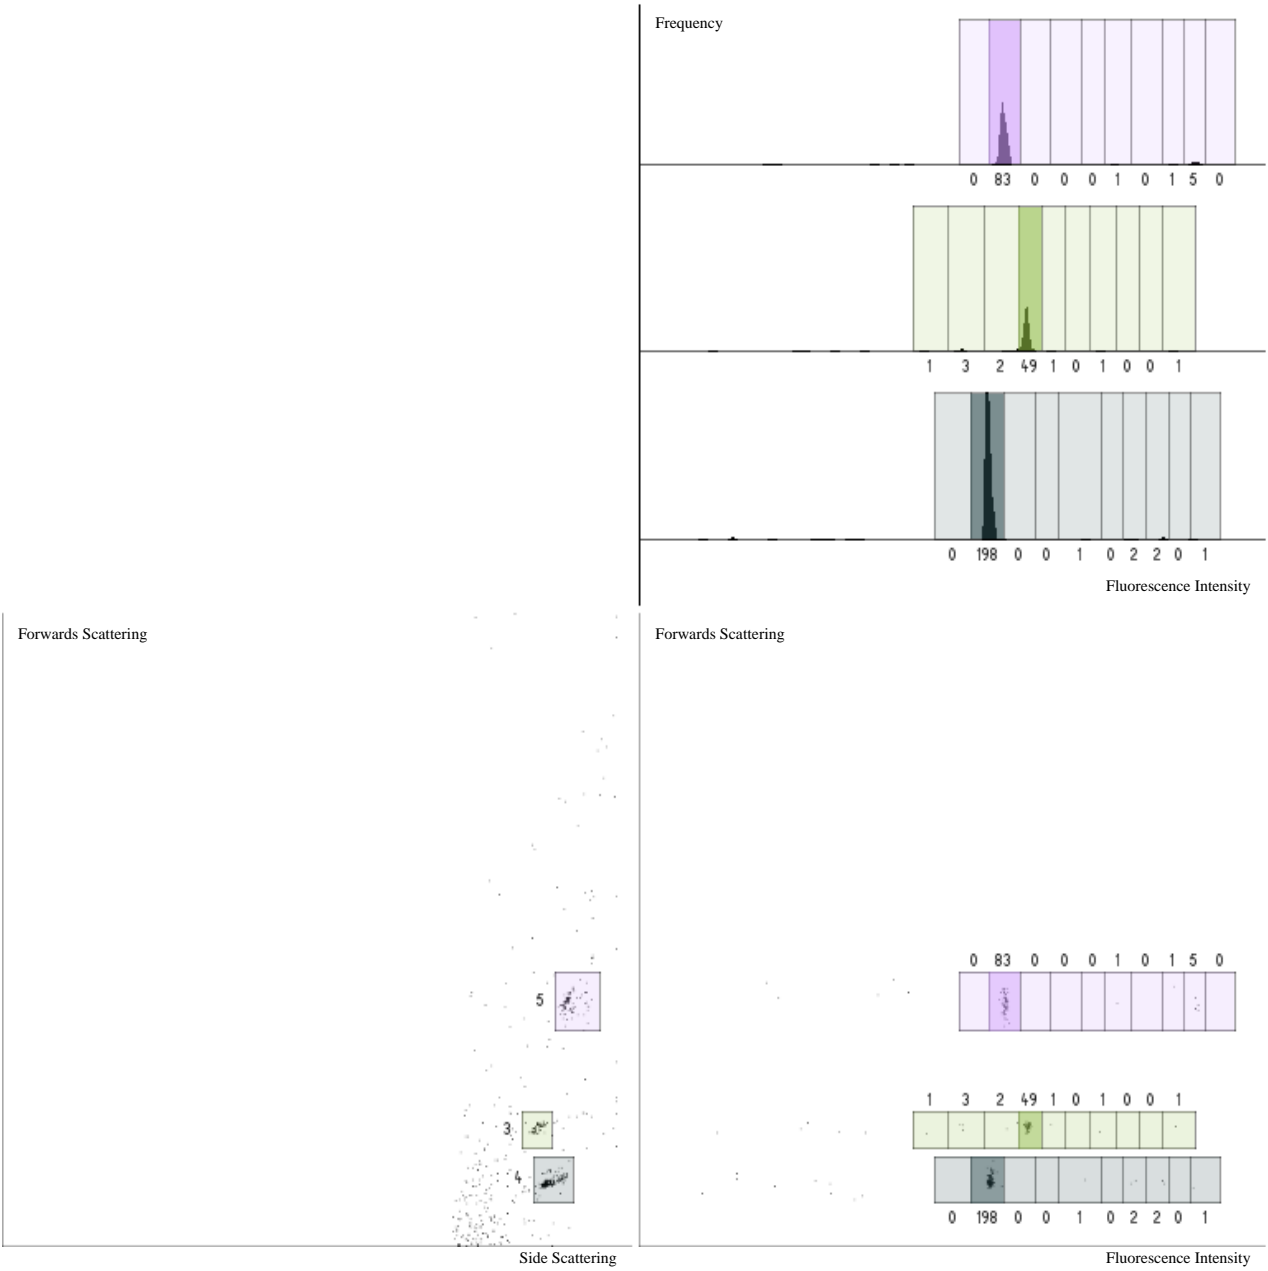

ANNEX 3: TAG DECONVOLUTION - BEAD 443

Passes flow sorting criteria: Yes  
Passes tag deconvolution criteria: Yes  
Included in protocol analysis: Yes  
Protocol: 1, 5, 2, 9  
Filename: Bin9\_plateA0\_B5.fcs  
Split 1: Petrol shading  
Split 2: Green shading  
Split 3: Violet shading

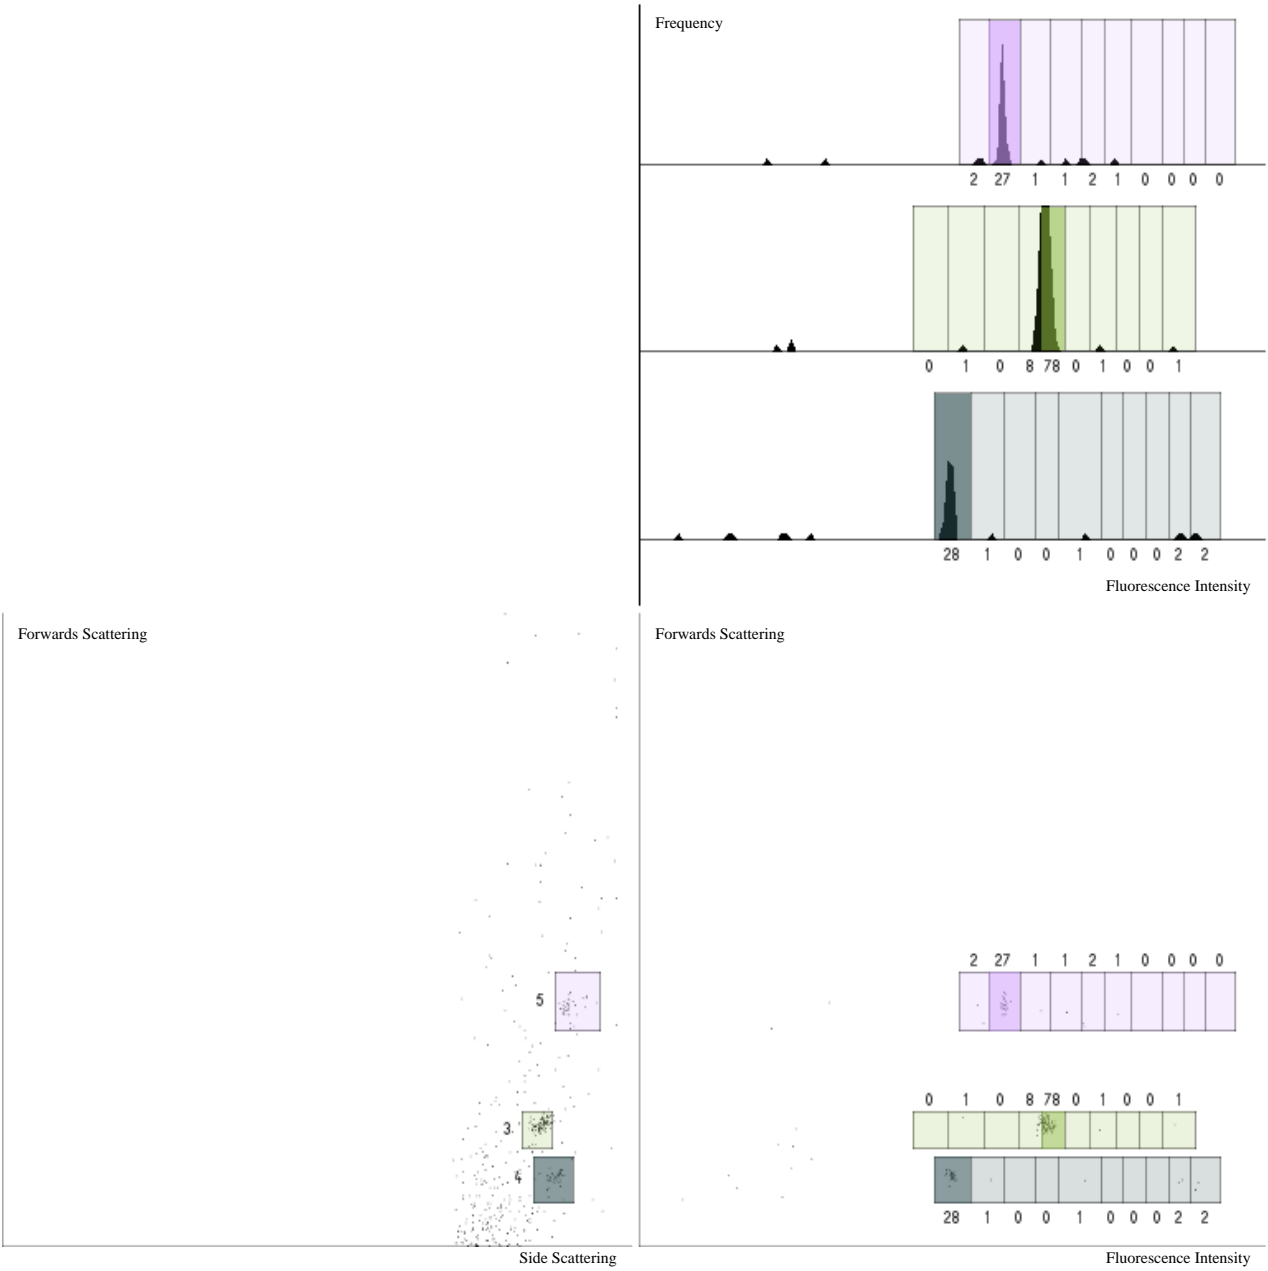

ANNEX 3: TAG DECONVOLUTION - BEAD 444

Passes flow sorting criteria: Yes  
Passes tag deconvolution criteria: Yes  
Included in protocol analysis: Yes  
Protocol: 7, 3, 1, 9  
Filename: Bin9\_plateA0\_B6.fcs  
Split 1: Petrol shading  
Split 2: Green shading  
Split 3: Violet shading

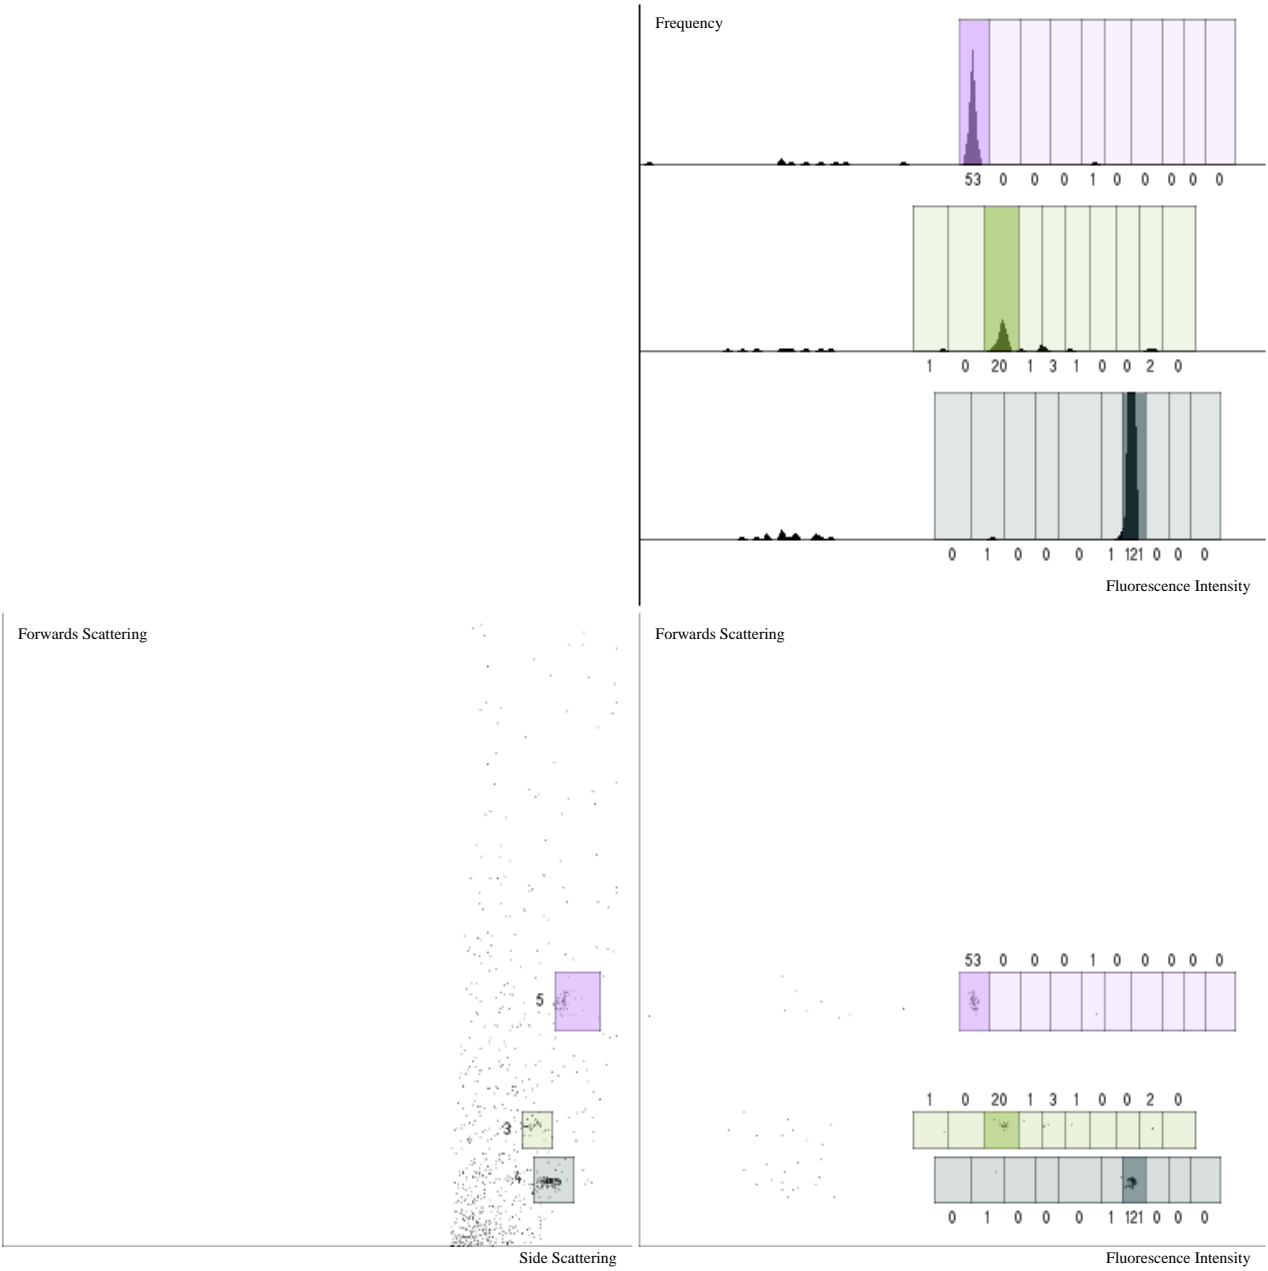

ANNEX 3: TAG DECONVOLUTION - BEAD 445

Passes flow sorting criteria: Yes  
Passes tag deconvolution criteria: Yes  
Included in protocol analysis: Yes  
Protocol: 7, 8, 9, 9  
Filename: Bin9\_plateA0\_B7.fcs  
Split 1: Petrol shading  
Split 2: Green shading  
Split 3: Violet shading

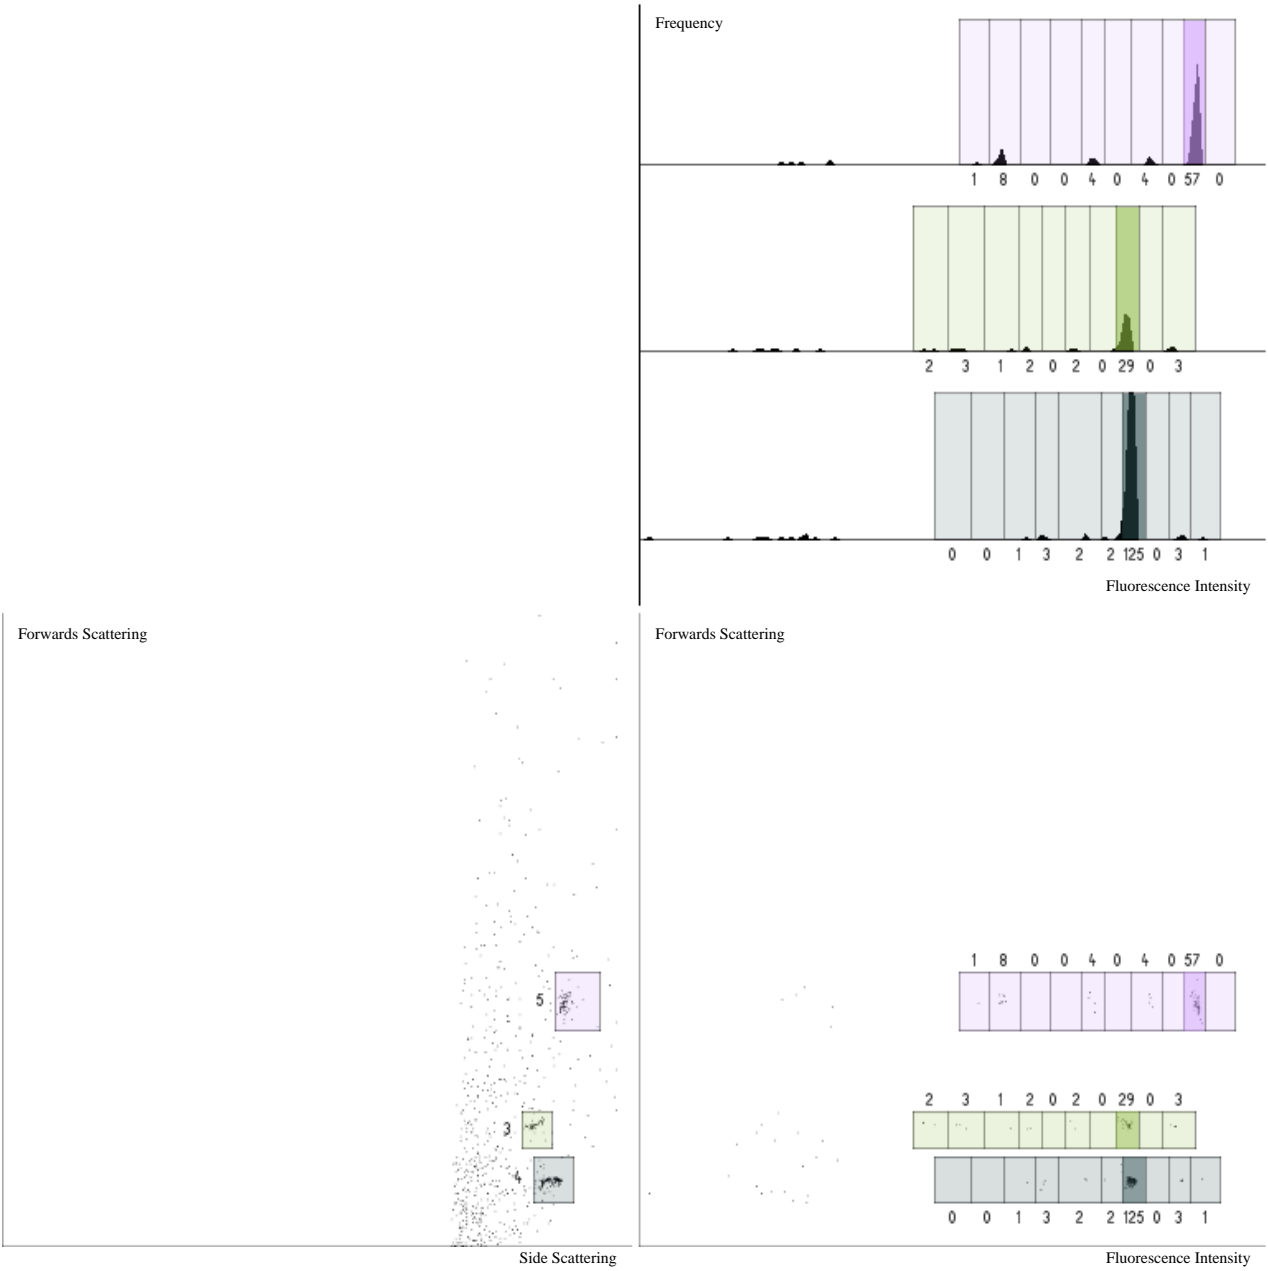

ANNEX 3: TAG DECONVOLUTION - BEAD 446

Passes flow sorting criteria: Yes  
Passes tag deconvolution criteria: No  
Included in protocol analysis: No  
Protocol: N/A  
Filename: Bin9\_plateA0\_B8.fcs  
Split 1: Petrol shading  
Split 2: Green shading  
Split 3: Violet shading

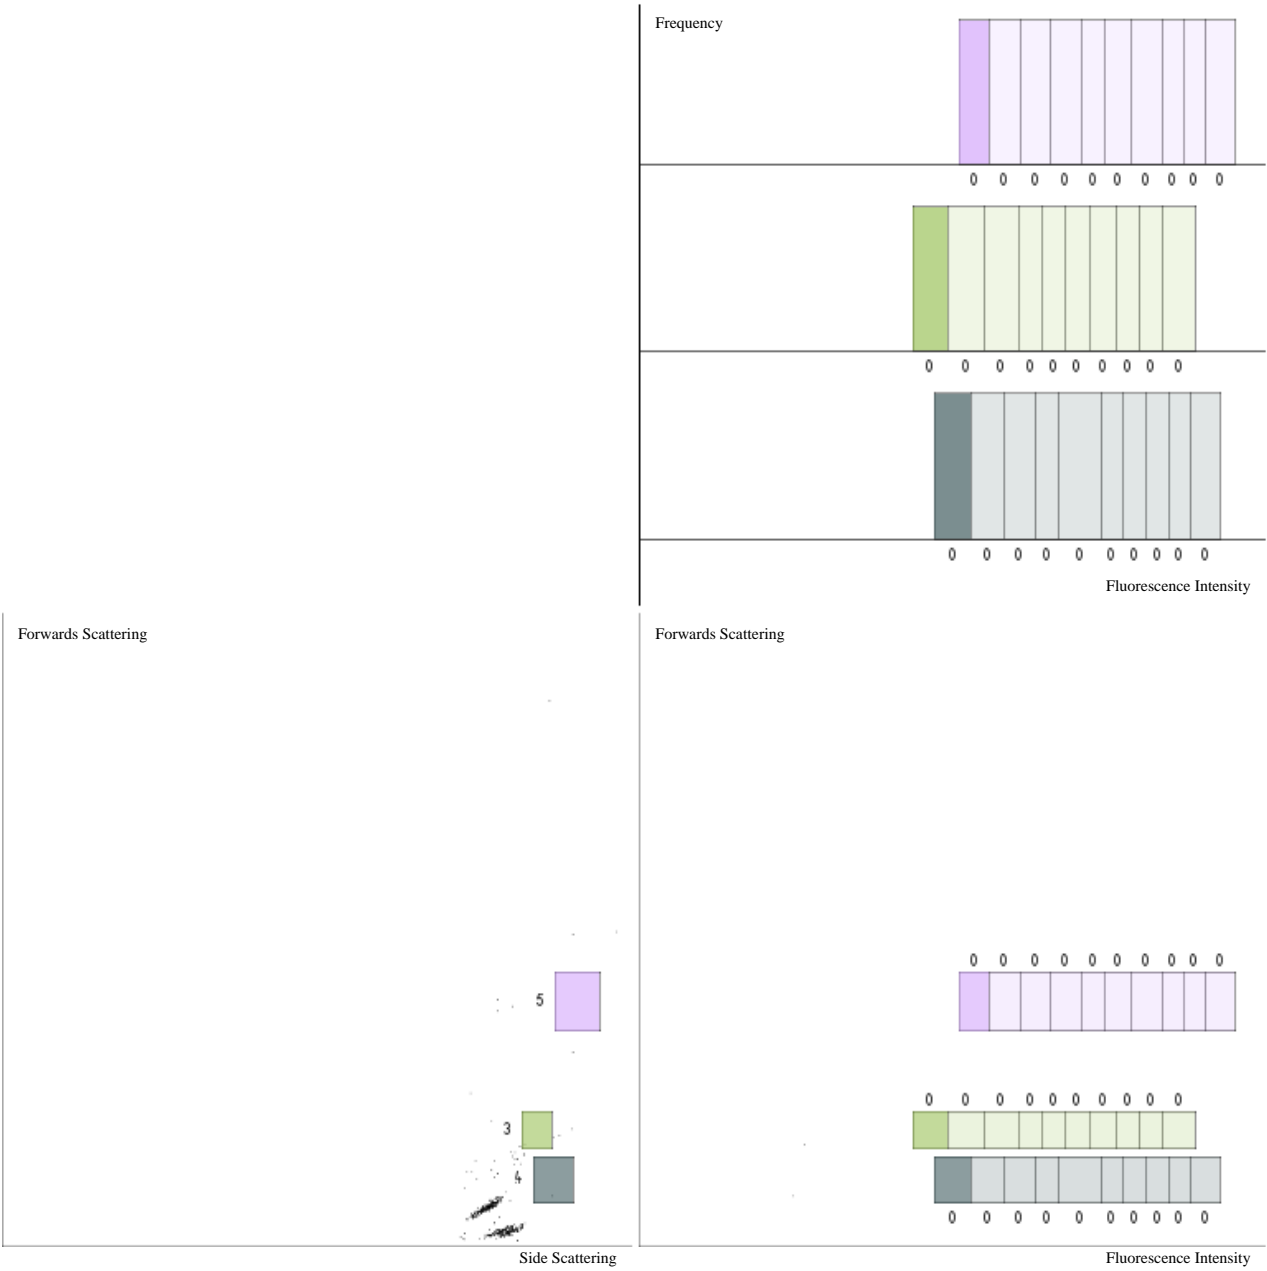



ANNEX 3: TAG DECONVOLUTION - BEAD 447

Passes flow sorting criteria: Yes  
Passes tag deconvolution criteria: Yes  
Included in protocol analysis: Yes  
Protocol: 4, 6, 7, 9  
Filename: Bin9\_plateA0\_B9.fcs  
Split 1: Petrol shading  
Split 2: Green shading  
Split 3: Violet shading

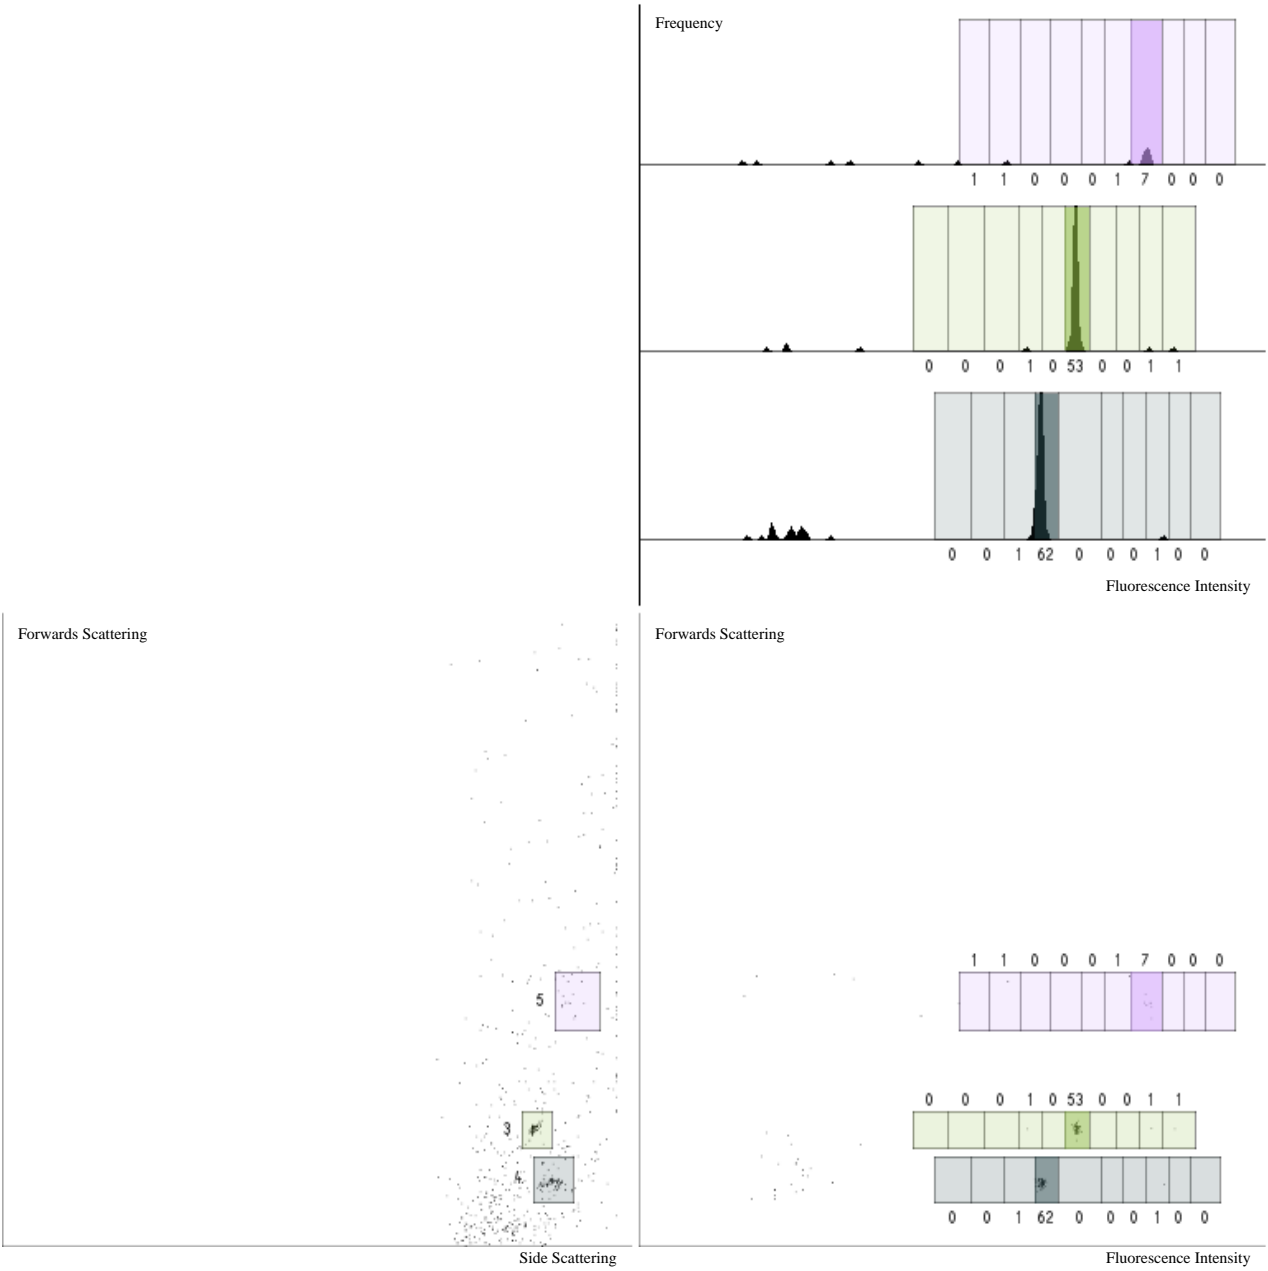

ANNEX 3: TAG DECONVOLUTION - BEAD 448

Passes flow sorting criteria: Yes  
Passes tag deconvolution criteria: No  
Included in protocol analysis: No  
Protocol: N/A  
Filename: Bin9\_plateA0\_B10.fcs  
Split 1: Petrol shading  
Split 2: Green shading  
Split 3: Violet shading

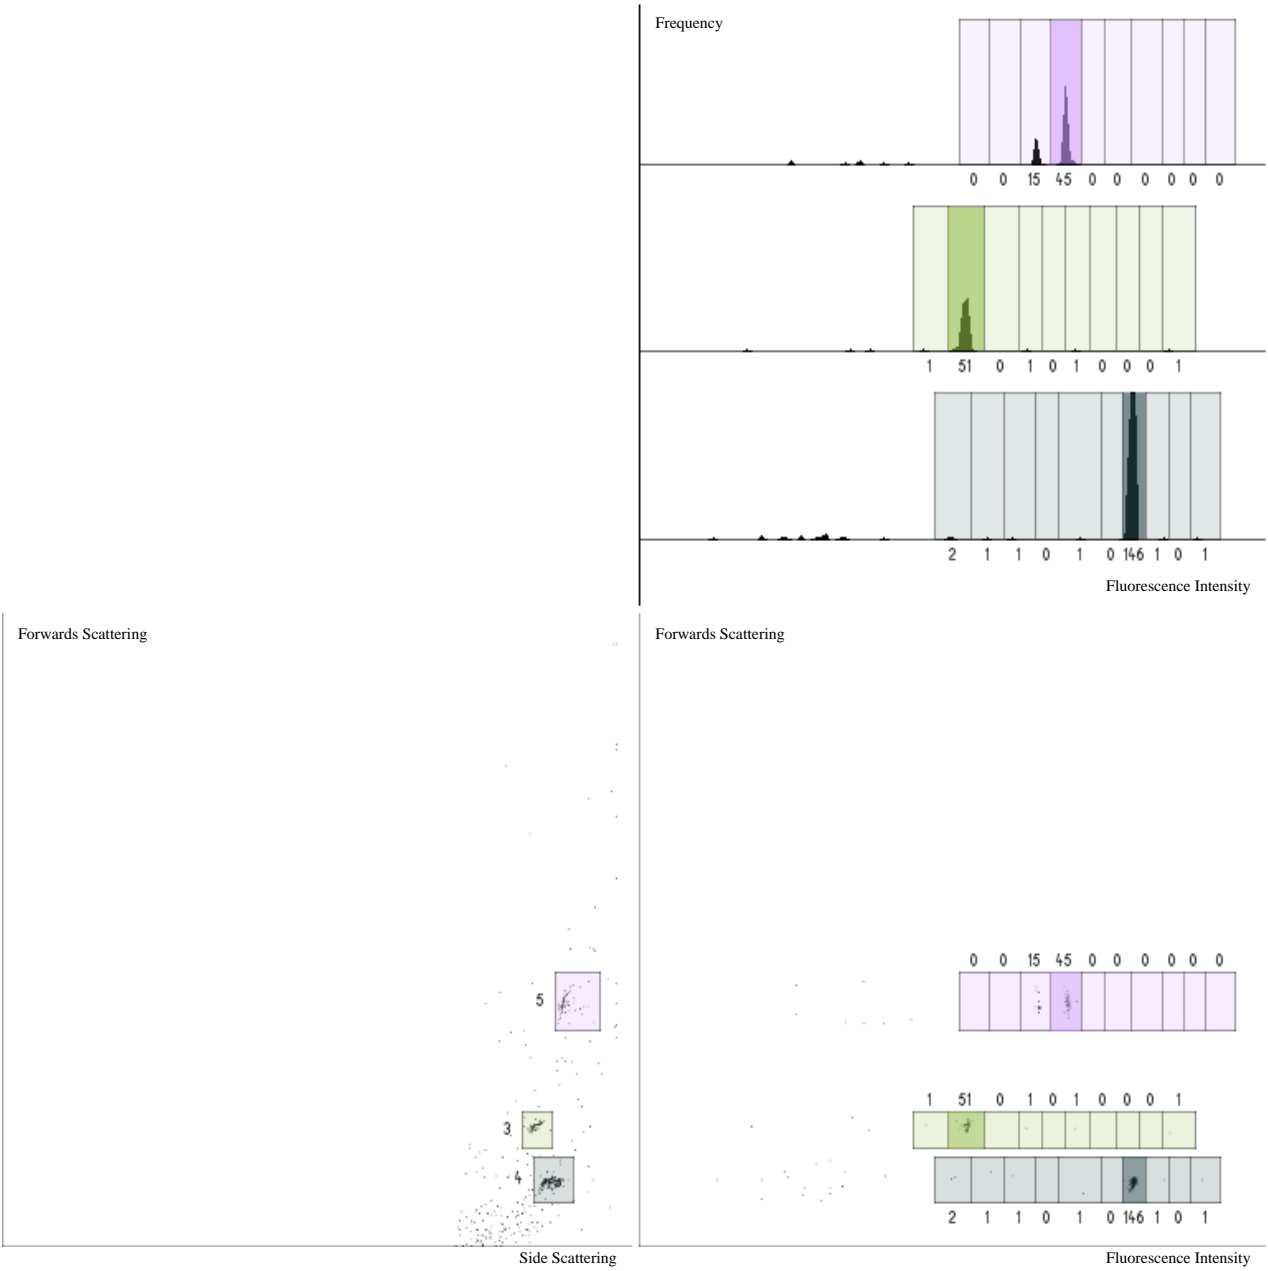

ANNEX 3: TAG DECONVOLUTION - BEAD 449

Passes flow sorting criteria: Yes  
Passes tag deconvolution criteria: Yes  
Included in protocol analysis: Yes  
Protocol: 9, 8, 9, 9  
Filename: Bin9\_plateA0\_B11.fcs  
Split 1: Petrol shading  
Split 2: Green shading  
Split 3: Violet shading

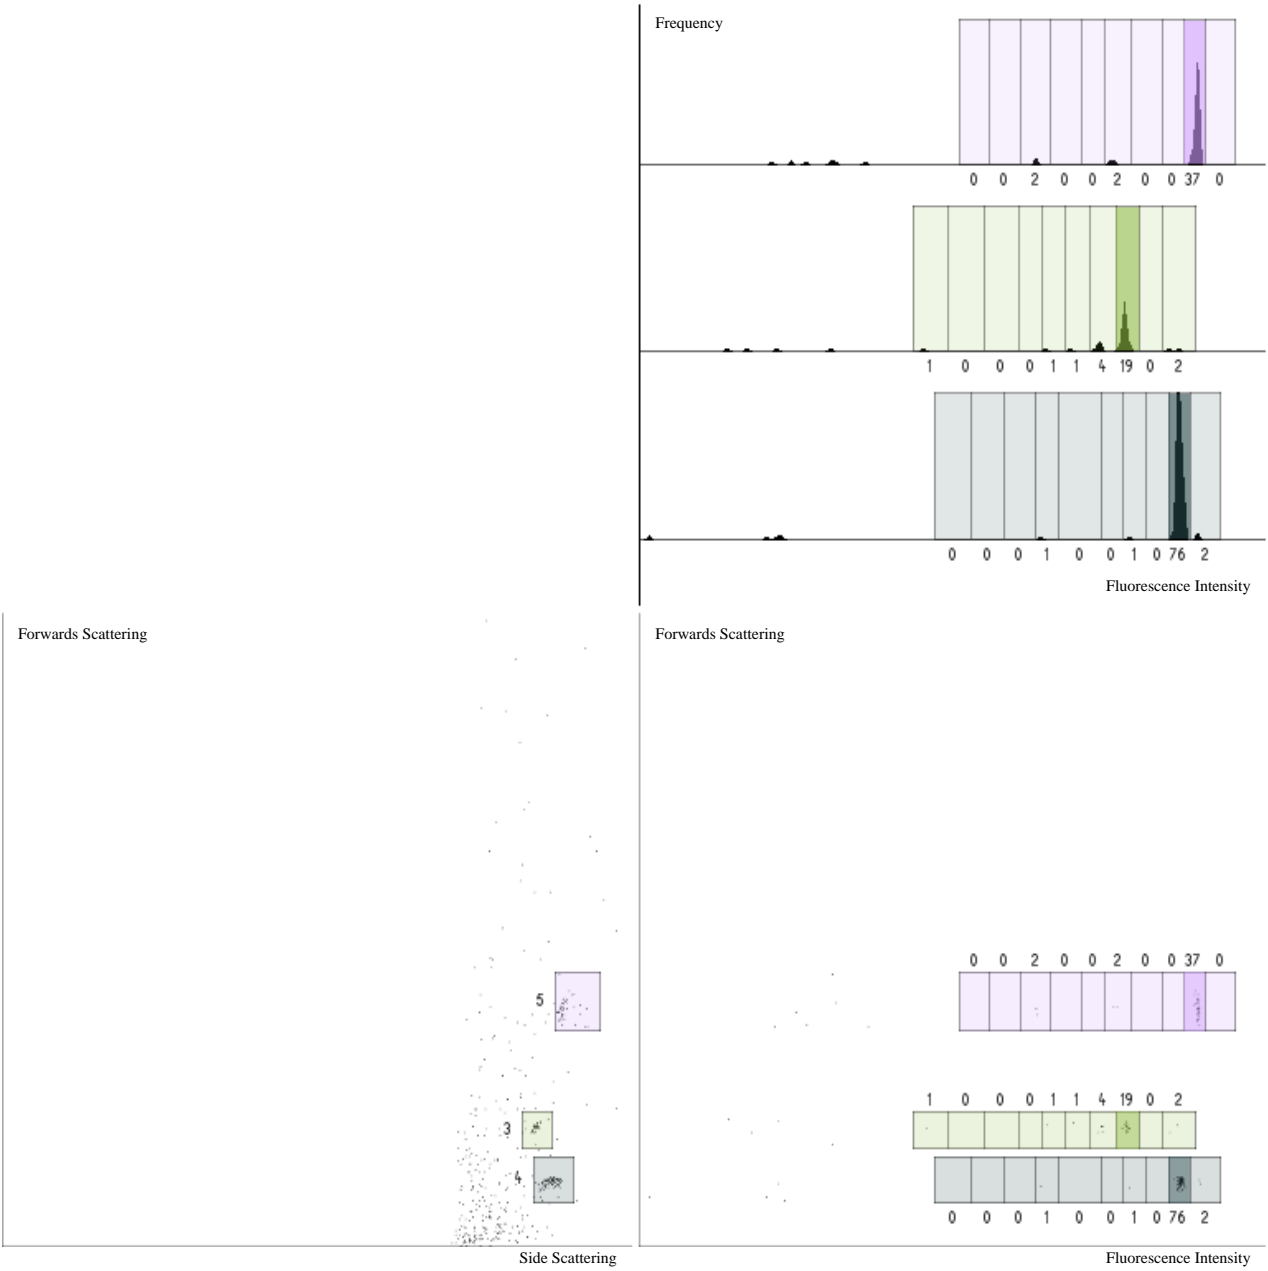

ANNEX 3: TAG DECONVOLUTION - BEAD 450

Passes flow sorting criteria: Yes  
Passes tag deconvolution criteria: Yes  
Included in protocol analysis: Yes  
Protocol: 8, 9, 8, 9  
Filename: Bin9\_plateA0\_B12.fcs  
Split 1: Petrol shading  
Split 2: Green shading  
Split 3: Violet shading

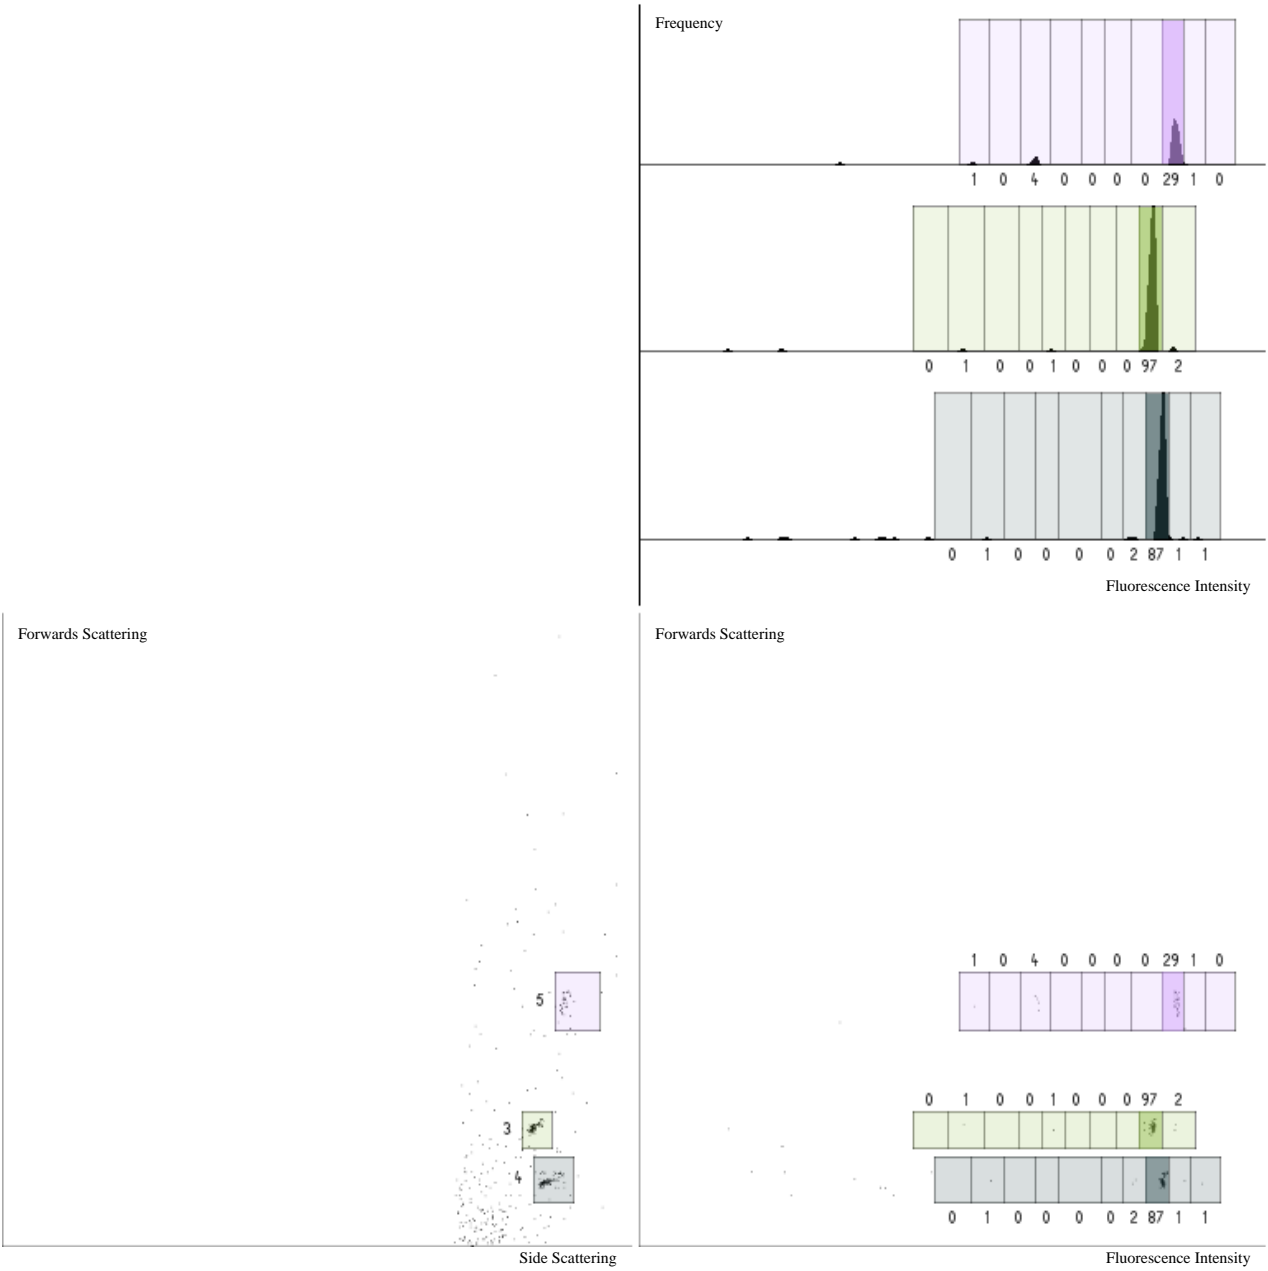

ANNEX 3: TAG DECONVOLUTION - BEAD 451

Passes flow sorting criteria: Yes  
Passes tag deconvolution criteria: Yes  
Included in protocol analysis: Yes  
Protocol: 2, 10, 6, 9  
Filename: Bin9\_plateA0\_C1.fcs  
Split 1: Petrol shading  
Split 2: Green shading  
Split 3: Violet shading

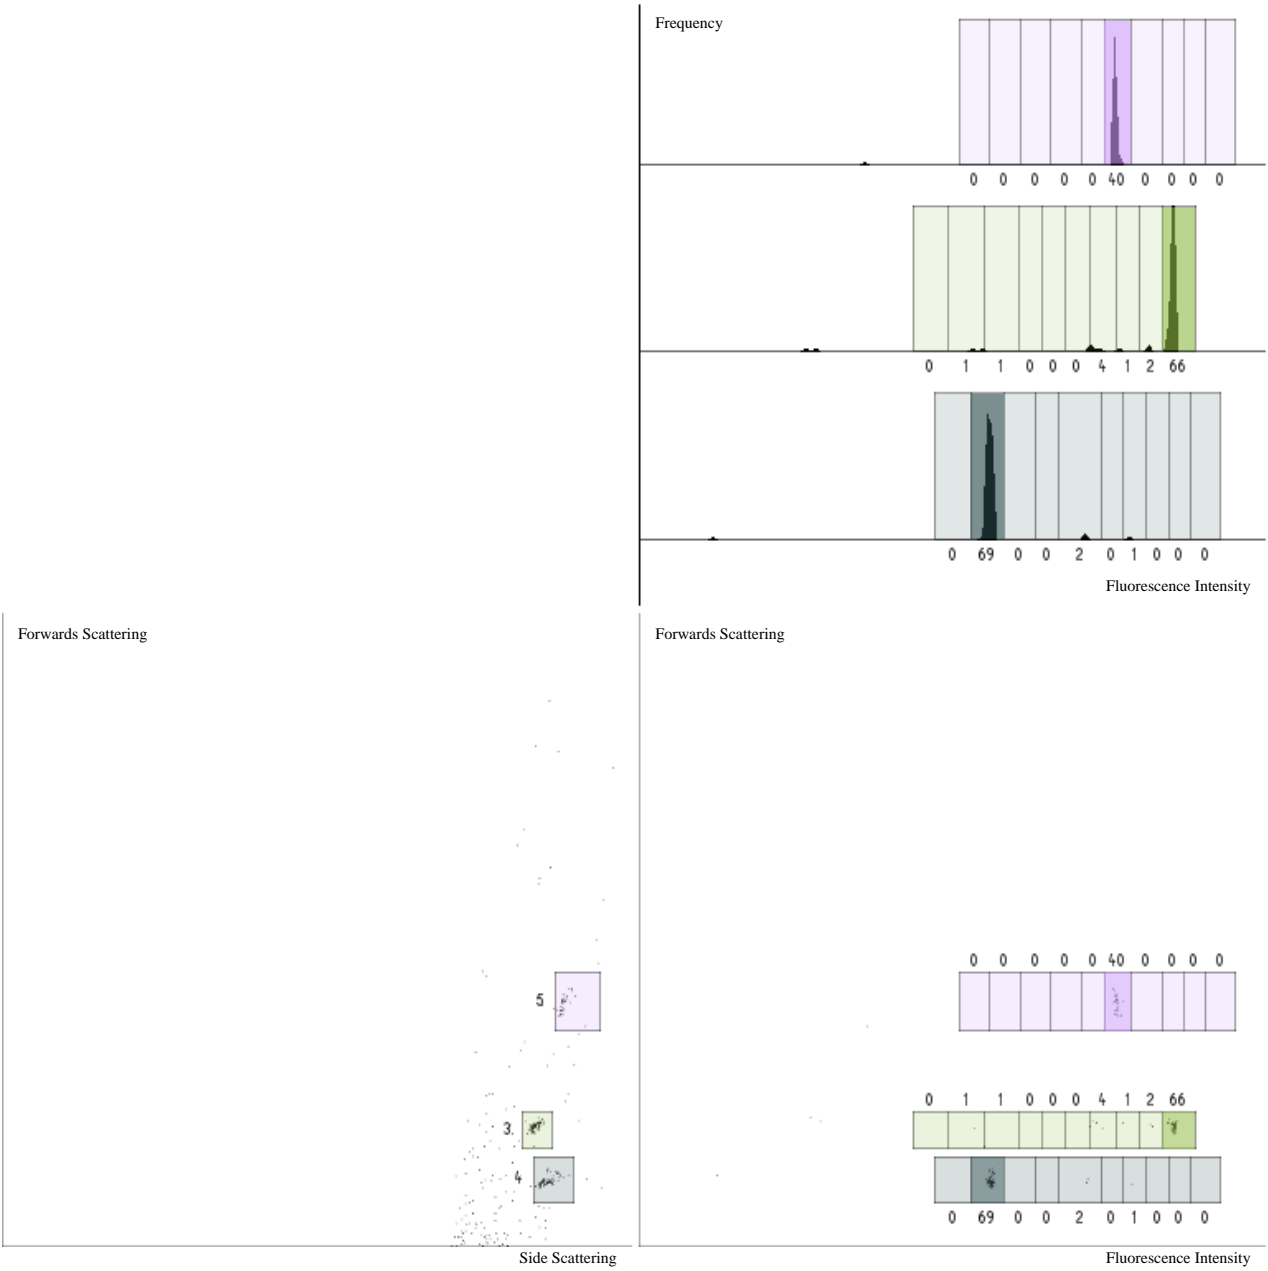

ANNEX 3: TAG DECONVOLUTION - BEAD 452

Passes flow sorting criteria: Yes  
Passes tag deconvolution criteria: No  
Included in protocol analysis: No  
Protocol: N/A  
Filename: Bin9\_plateA0\_C2.fcs  
Split 1: Petrol shading  
Split 2: Green shading  
Split 3: Violet shading

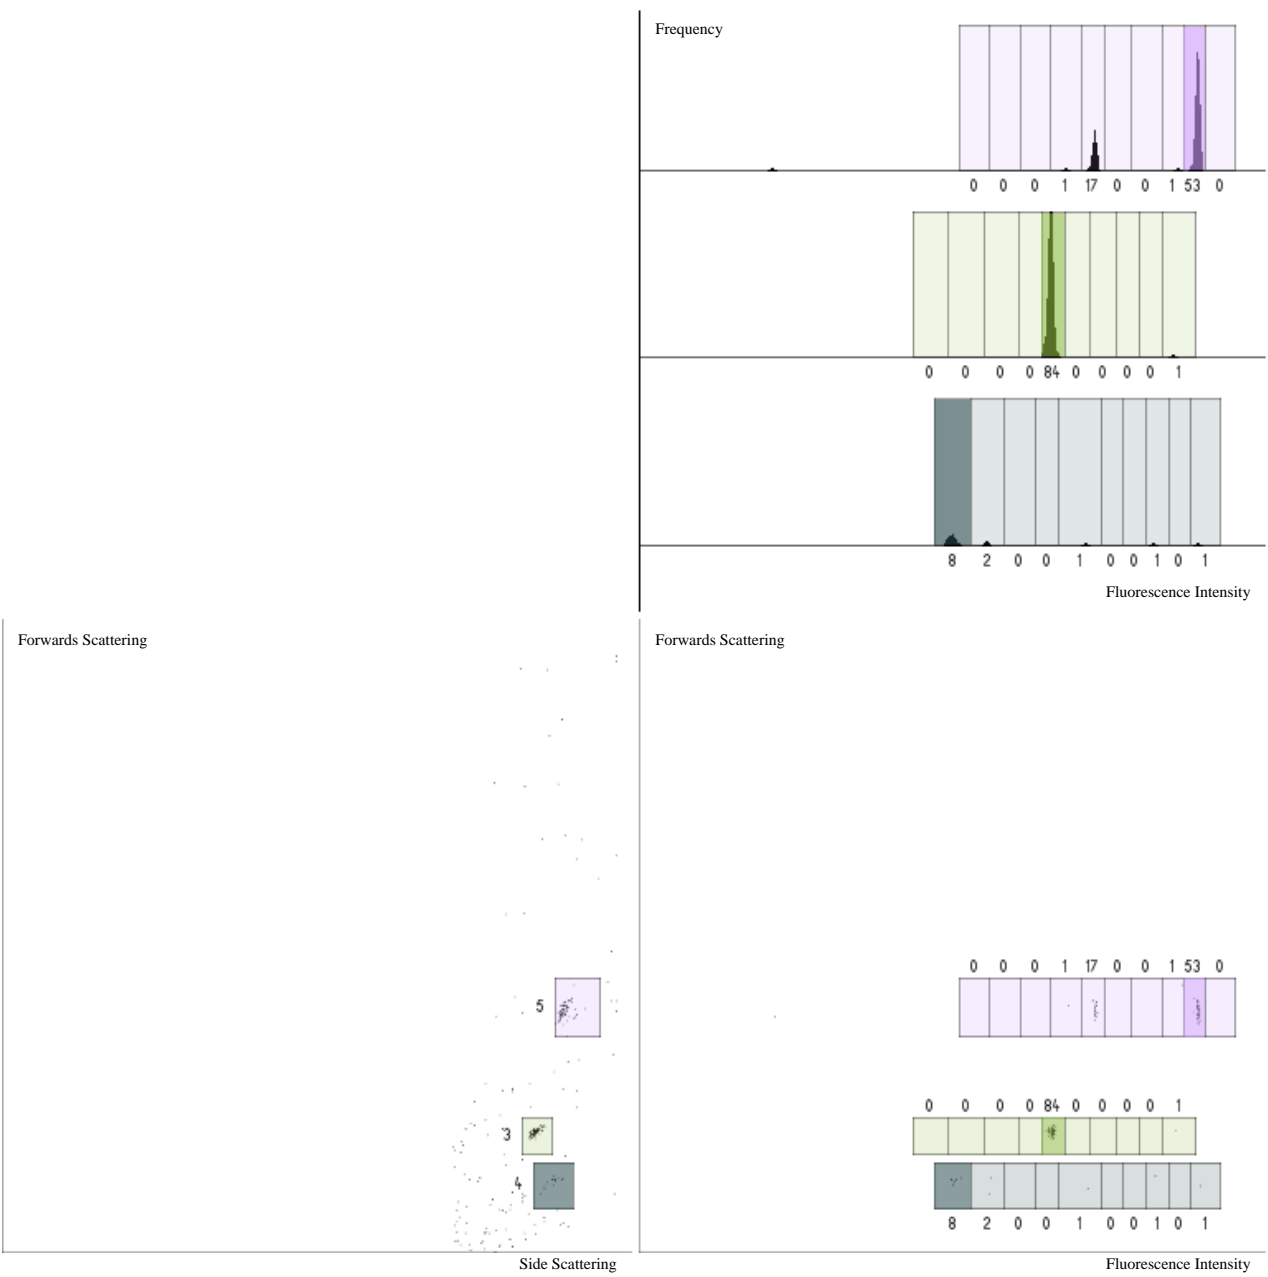

ANNEX 3: TAG DECONVOLUTION - BEAD 453

Passes flow sorting criteria: Yes  
Passes tag deconvolution criteria: Yes  
Included in protocol analysis: Yes  
Protocol: 2, 5, 5, 9  
Filename: Bin9\_plateA0\_C3.fcs  
Split 1: Petrol shading  
Split 2: Green shading  
Split 3: Violet shading

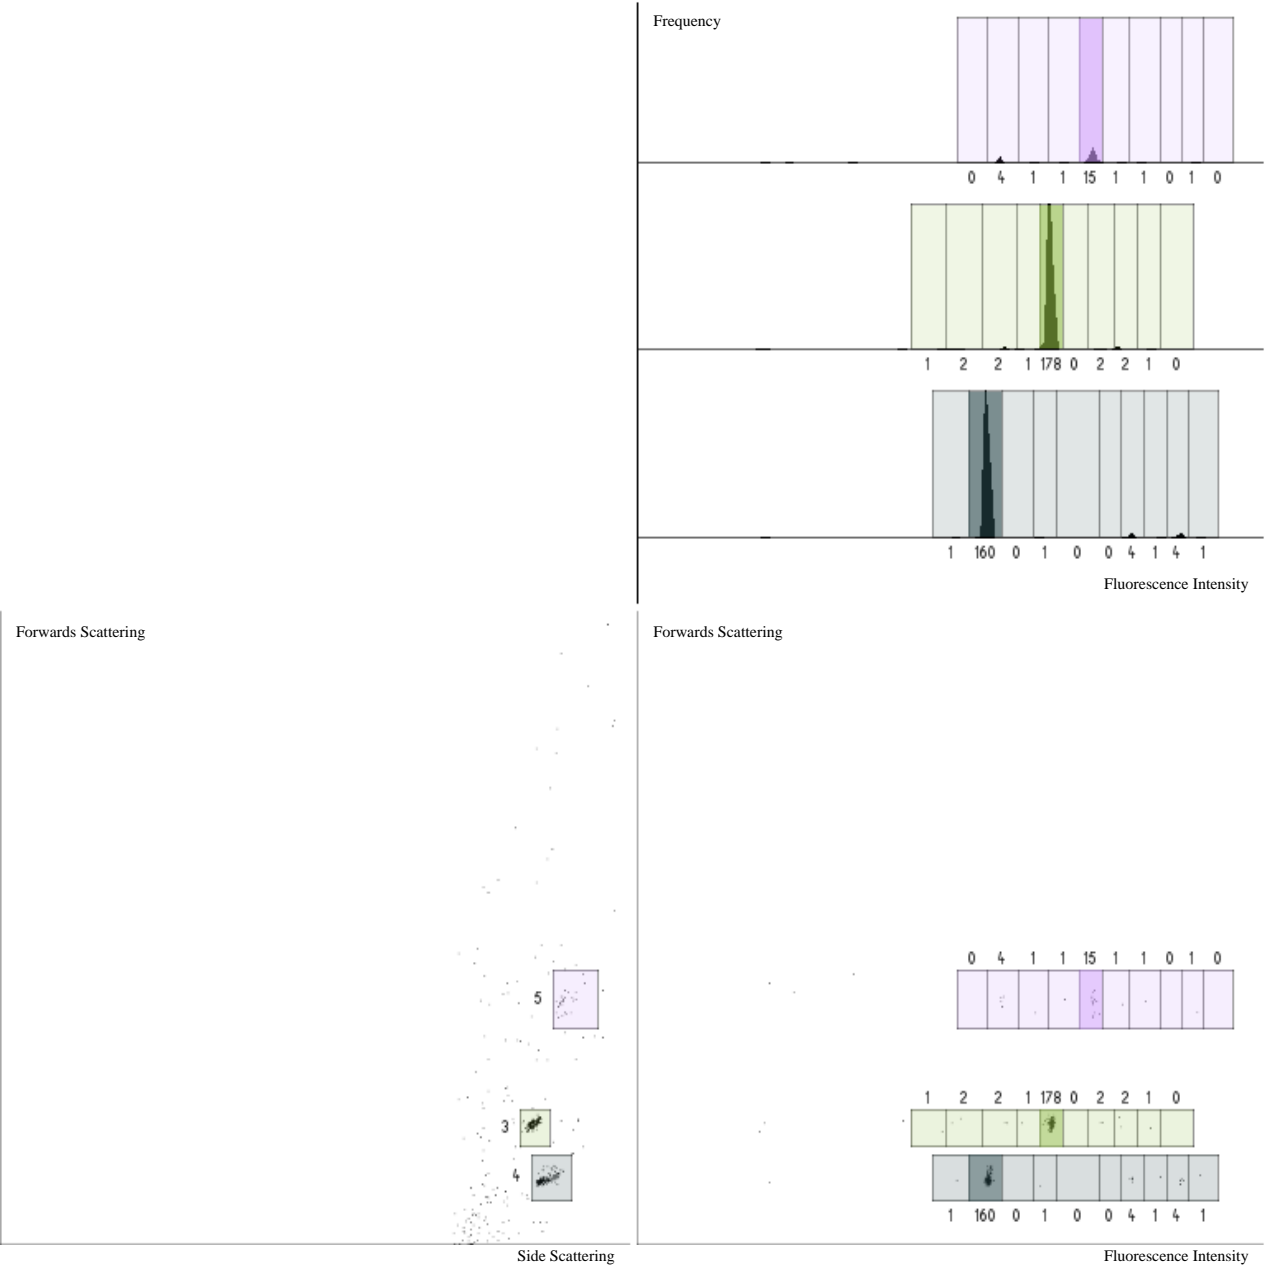

ANNEX 3: TAG DECONVOLUTION - BEAD 454

Passes flow sorting criteria: Yes  
Passes tag deconvolution criteria: Yes  
Included in protocol analysis: Yes  
Protocol: 3, 6, 6, 9  
Filename: Bin9\_plateA0\_C4.fcs  
Split 1: Petrol shading  
Split 2: Green shading  
Split 3: Violet shading

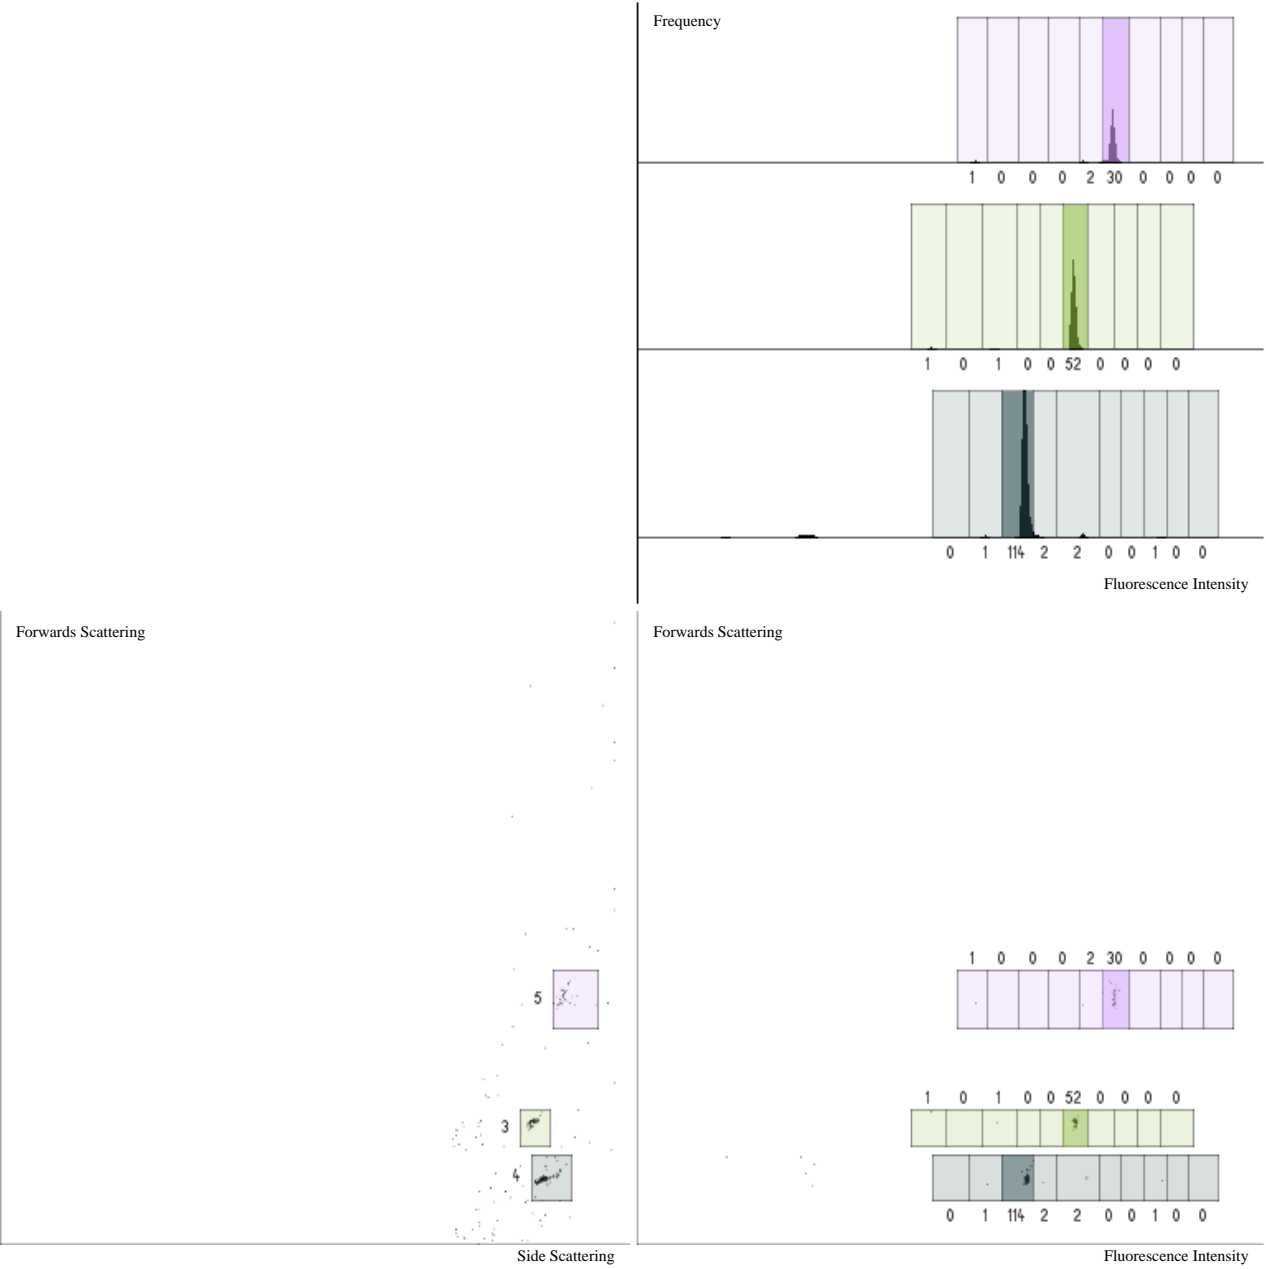



ANNEX 3: TAG DECONVOLUTION - BEAD 455

Passes flow sorting criteria: Yes  
Passes tag deconvolution criteria: Yes  
Included in protocol analysis: Yes  
Protocol: 10, 5, 1, 9  
Filename: Bin9\_plateA0\_C5.fcs  
Split 1: Petrol shading  
Split 2: Green shading  
Split 3: Violet shading

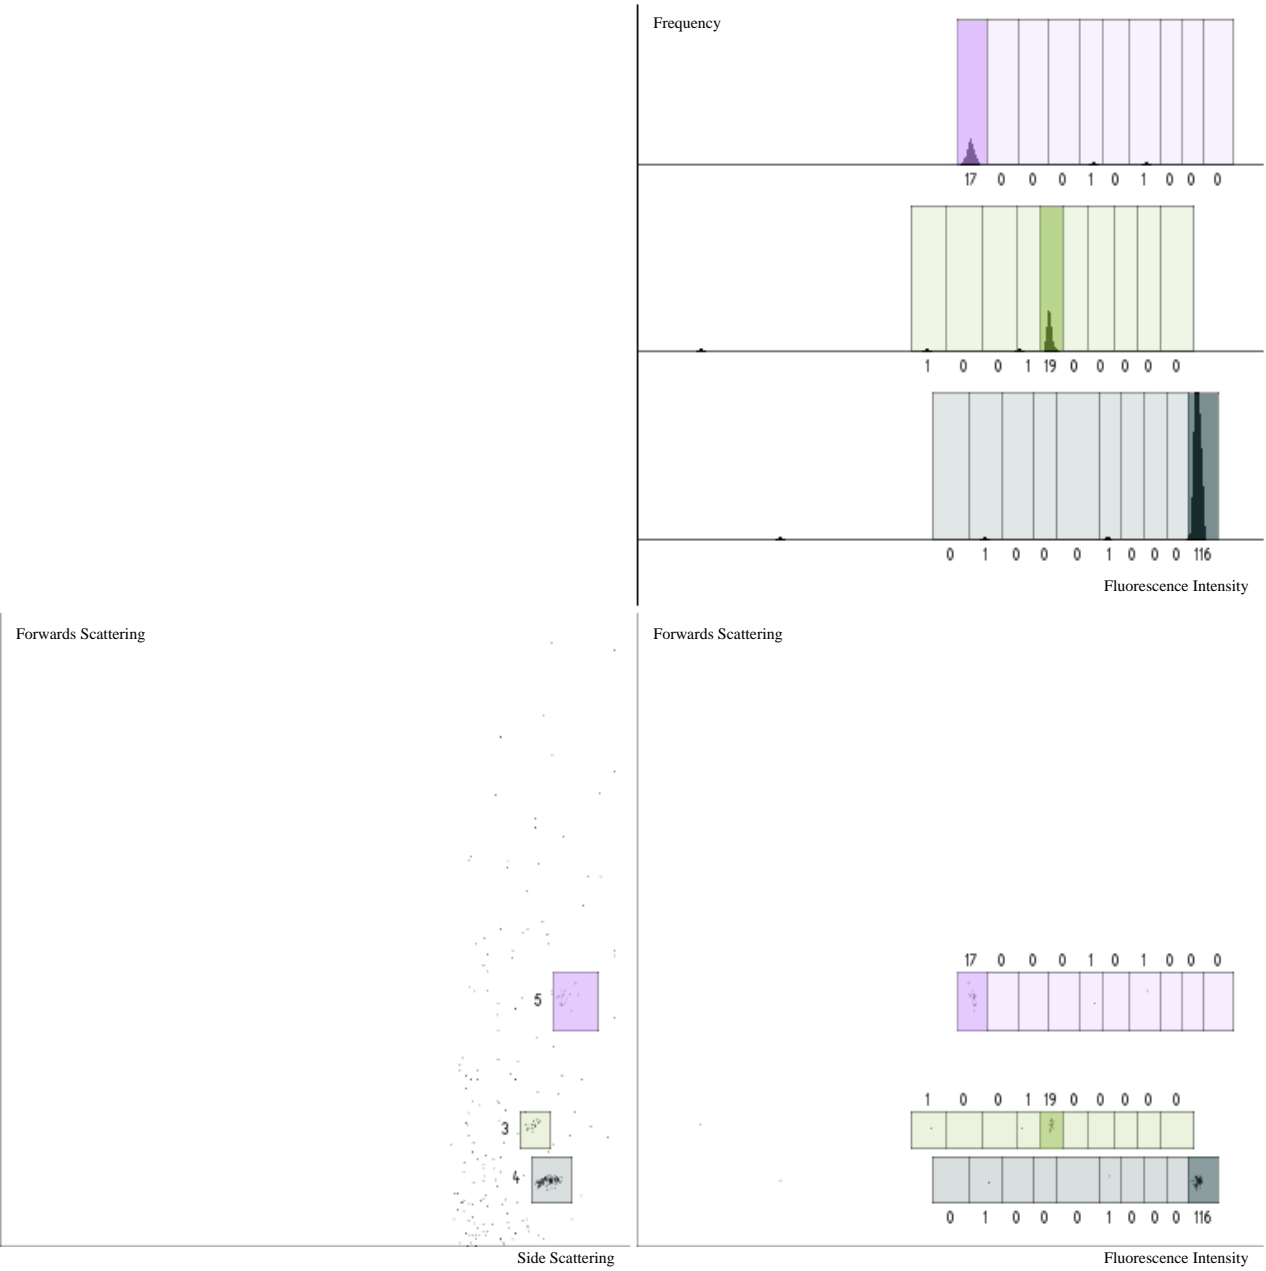

ANNEX 3: TAG DECONVOLUTION - BEAD 456

Passes flow sorting criteria: Yes  
Passes tag deconvolution criteria: Yes  
Included in protocol analysis: Yes  
Protocol: 3, 4, 7, 9  
Filename: Bin9\_plateA0\_C6.fcs  
Split 1: Petrol shading  
Split 2: Green shading  
Split 3: Violet shading

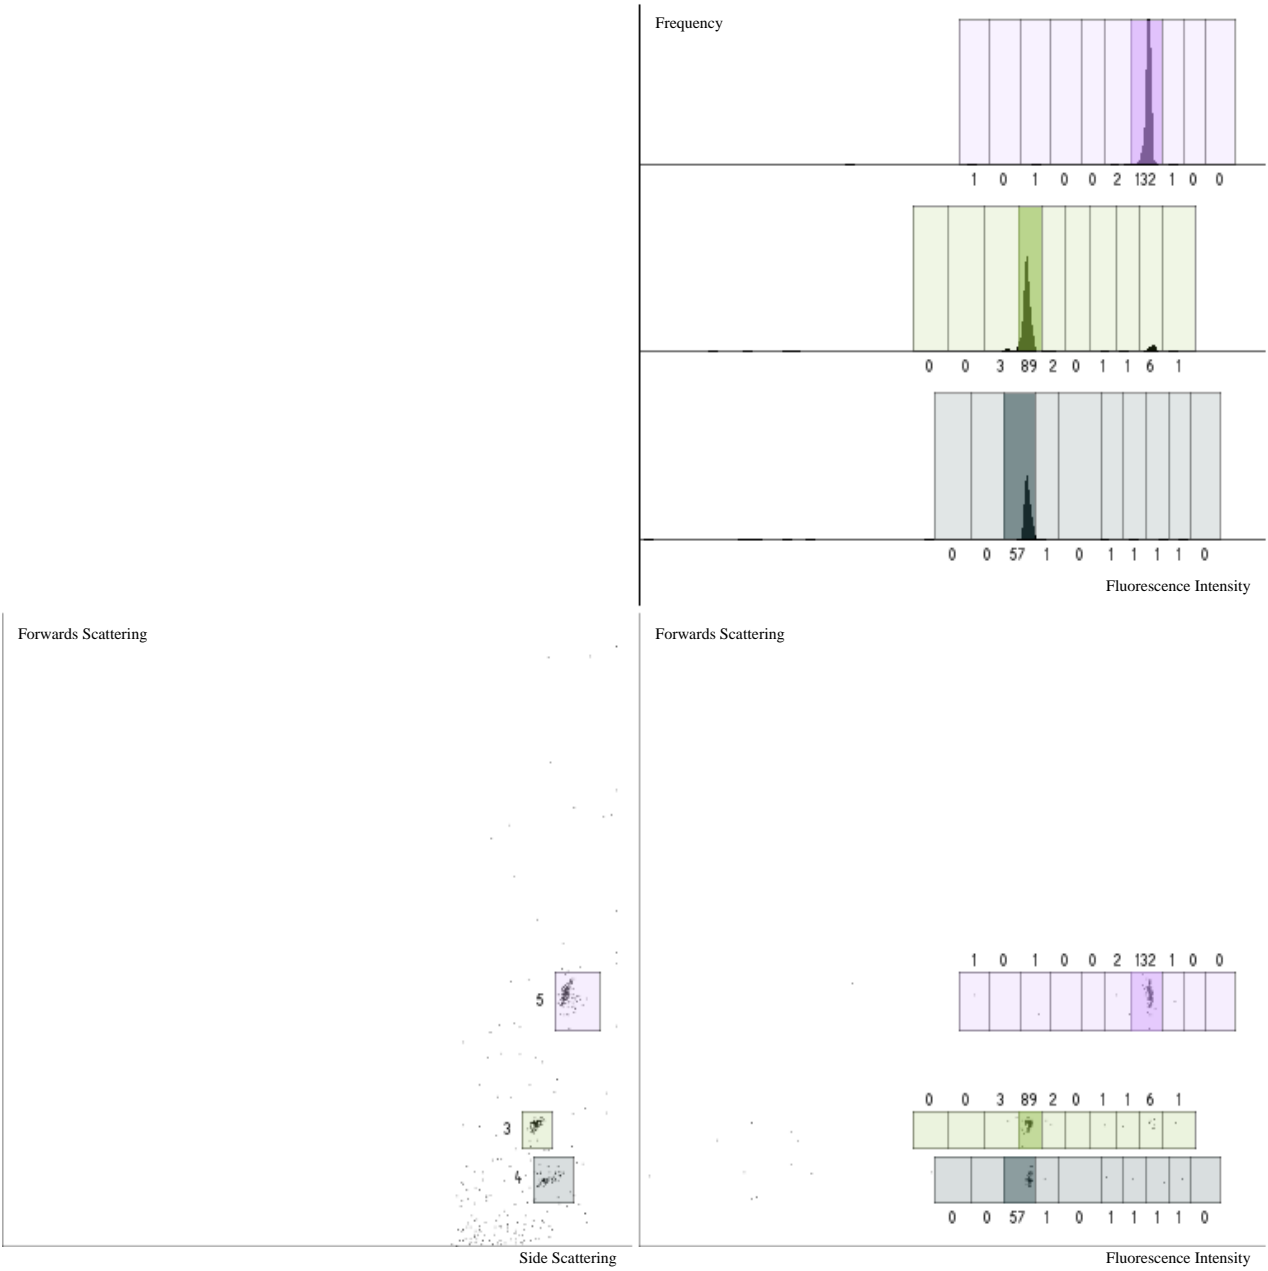

ANNEX 3: TAG DECONVOLUTION - BEAD 457

Passes flow sorting criteria: Yes  
Passes tag deconvolution criteria: No  
Included in protocol analysis: No  
Protocol: N/A  
Filename: Bin9\_plateA0\_C7.fcs  
Split 1: Petrol shading  
Split 2: Green shading  
Split 3: Violet shading

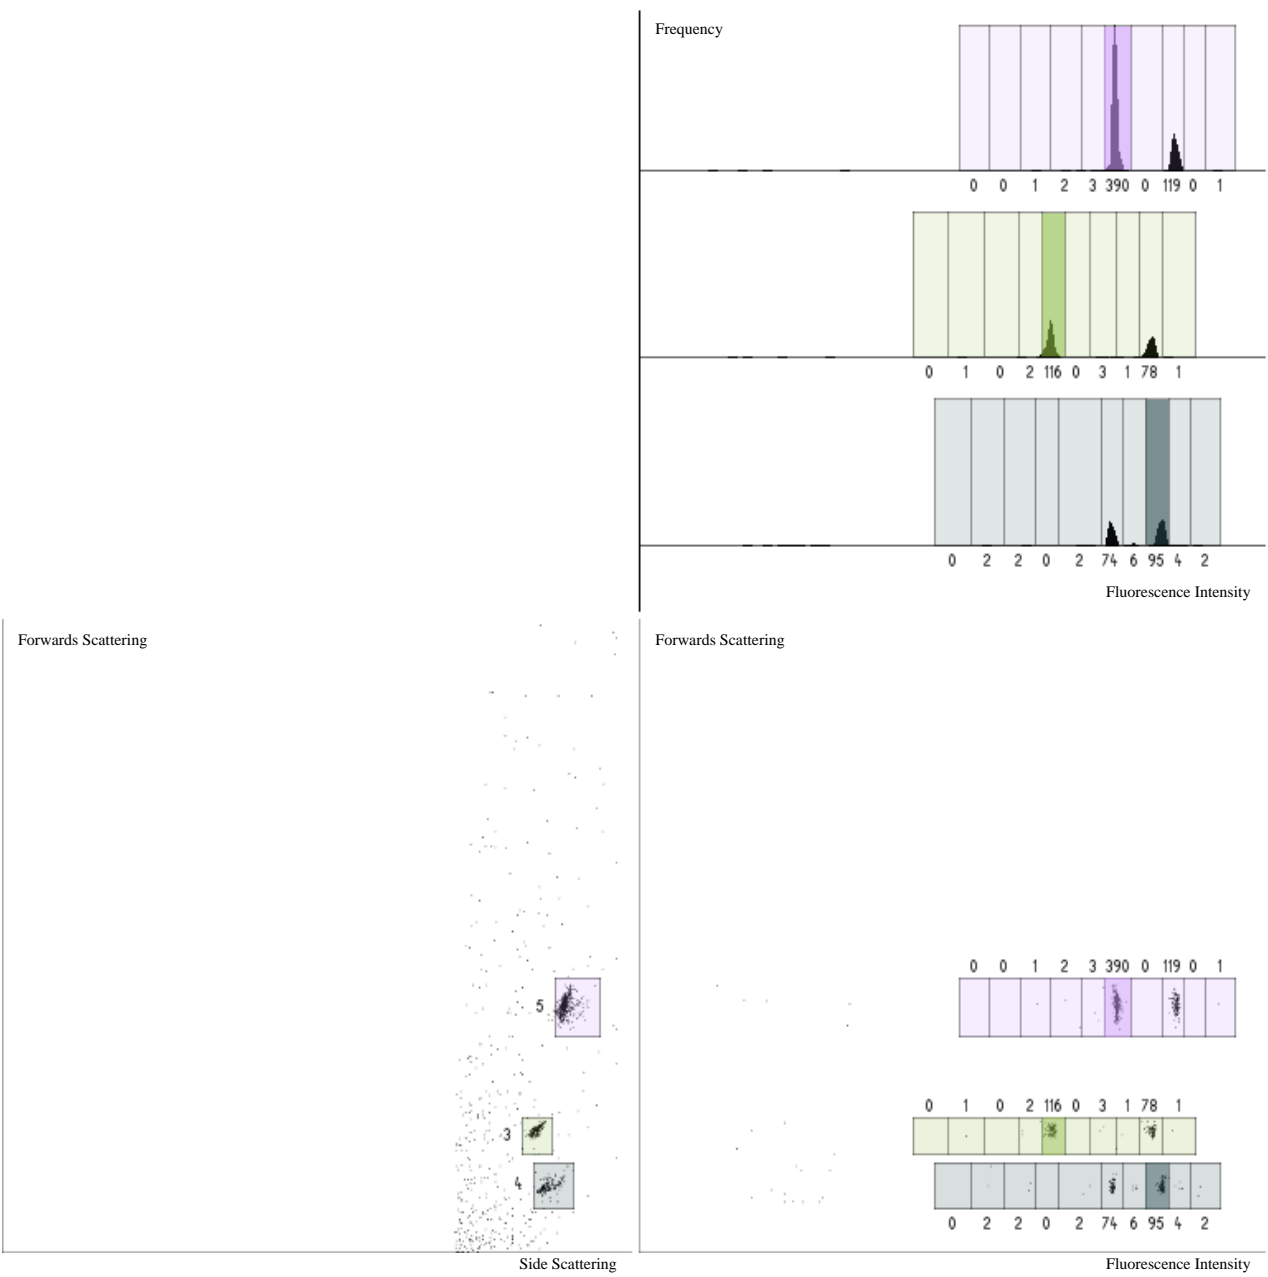

ANNEX 3: TAG DECONVOLUTION - BEAD 458

Passes flow sorting criteria: Yes  
Passes tag deconvolution criteria: Yes  
Included in protocol analysis: Yes  
Protocol: 7, 4, 4, 9  
Filename: Bin9\_plateA0\_C8.fcs  
Split 1: Petrol shading  
Split 2: Green shading  
Split 3: Violet shading

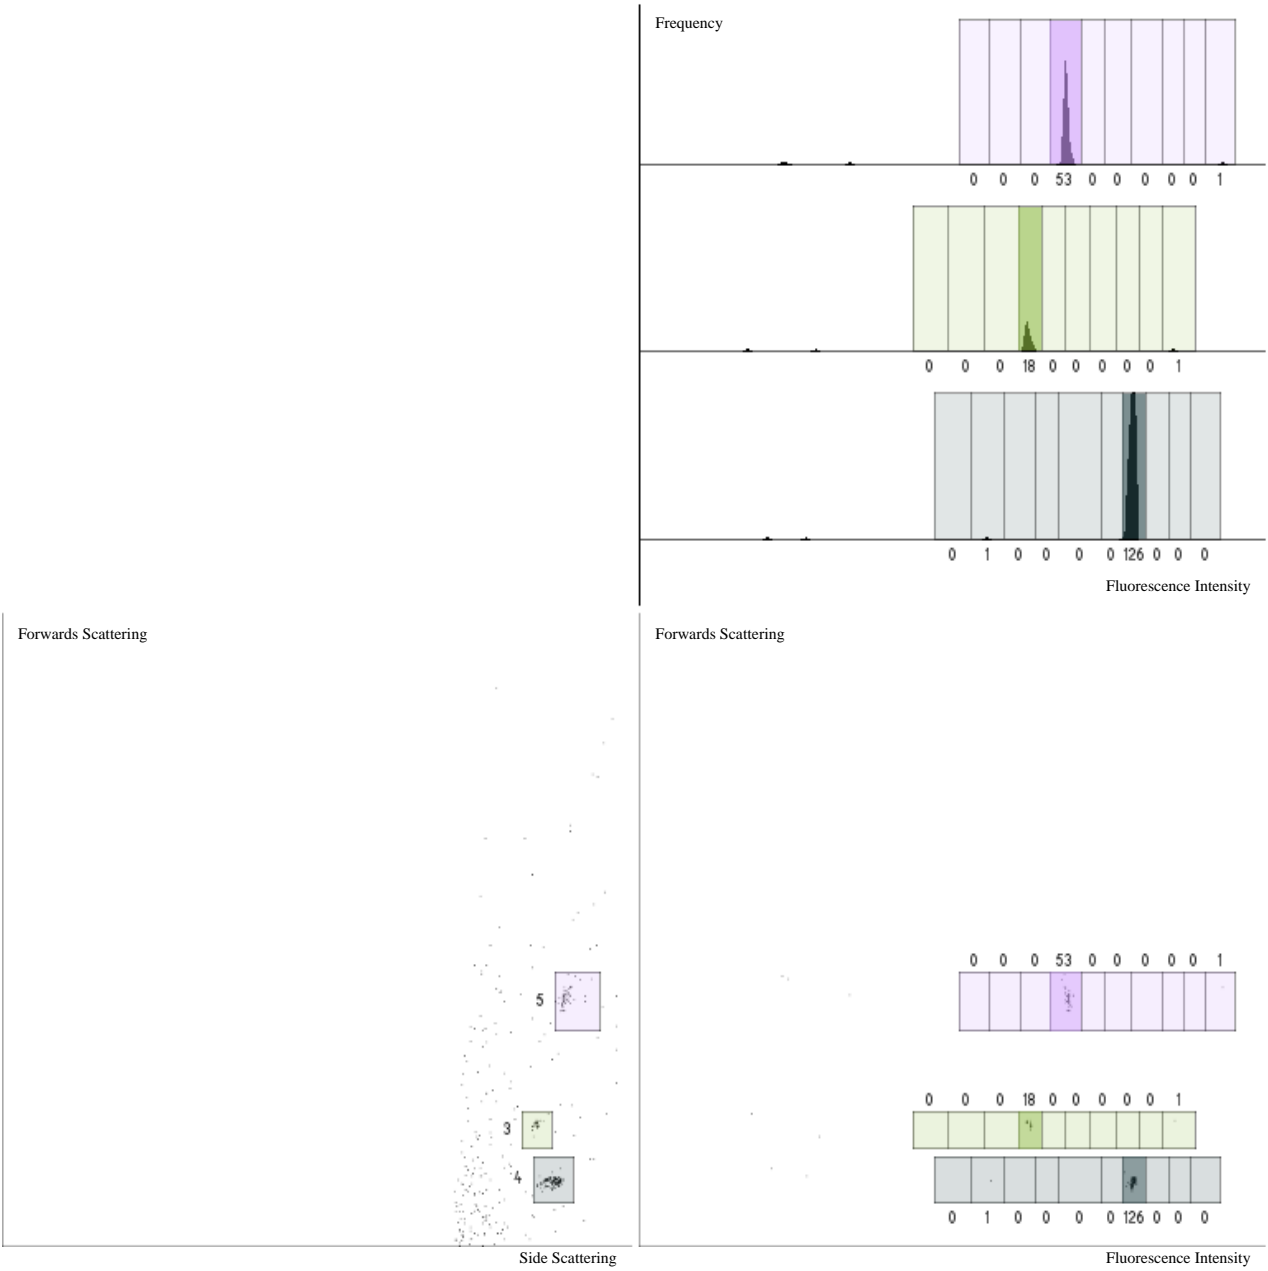

ANNEX 3: TAG DECONVOLUTION - BEAD 459

Passes flow sorting criteria: Yes  
Passes tag deconvolution criteria: No  
Included in protocol analysis: No  
Protocol: N/A  
Filename: Bin9\_plateA0\_C9.fcs  
Split 1: Petrol shading  
Split 2: Green shading  
Split 3: Violet shading

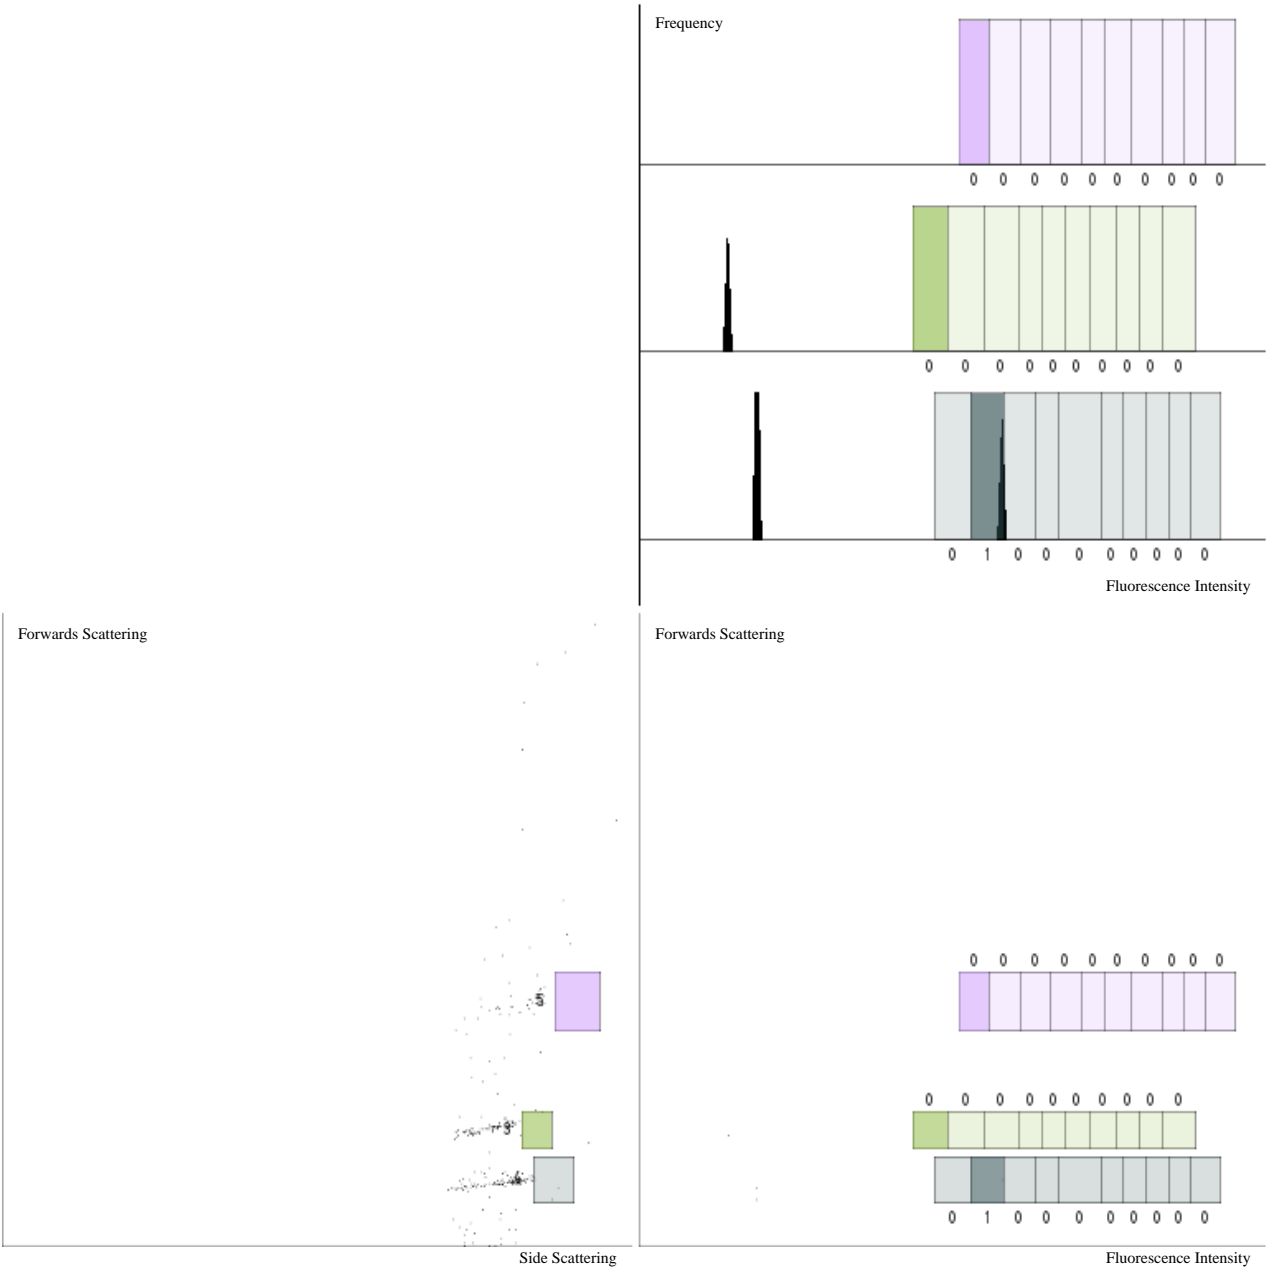

ANNEX 3: TAG DECONVOLUTION - BEAD 460

Passes flow sorting criteria: Yes  
Passes tag deconvolution criteria: No  
Included in protocol analysis: No  
Protocol: N/A  
Filename: Bin9\_plateA0\_C10.fcs  
Split 1: Petrol shading  
Split 2: Green shading  
Split 3: Violet shading

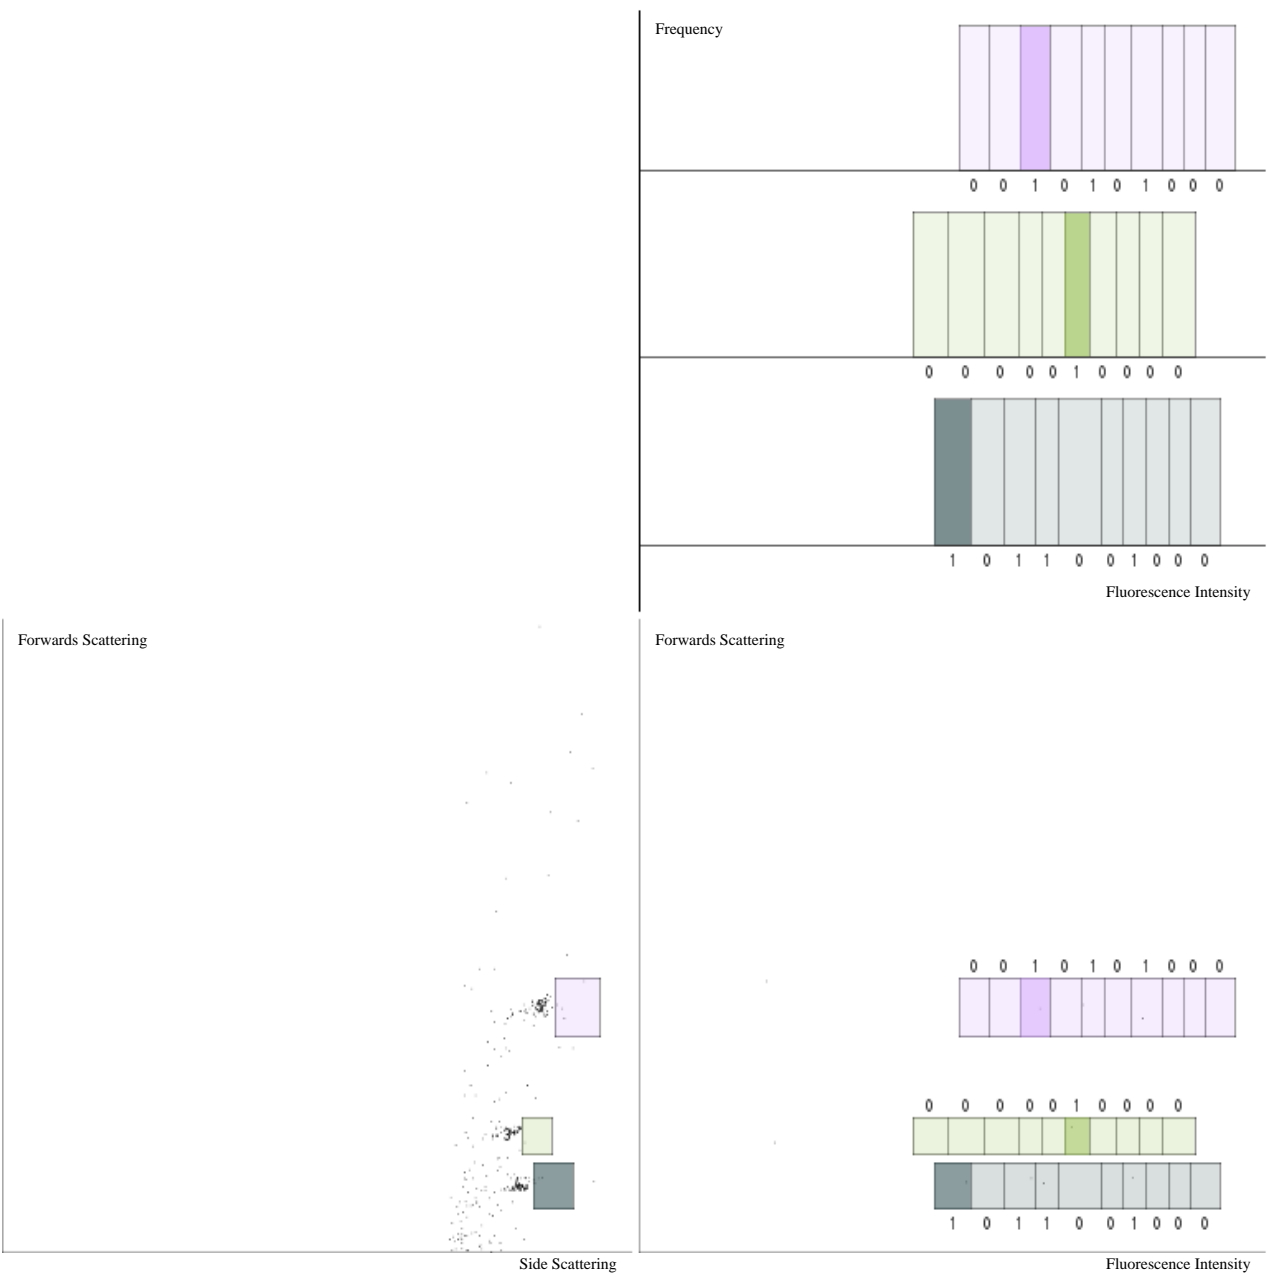

ANNEX 3: TAG DECONVOLUTION - BEAD 461

Passes flow sorting criteria: Yes  
Passes tag deconvolution criteria: Yes  
Included in protocol analysis: Yes  
Protocol: 10, 4, 2, 9  
Filename: Bin9\_plateA0\_C11.fcs  
Split 1: Petrol shading  
Split 2: Green shading  
Split 3: Violet shading

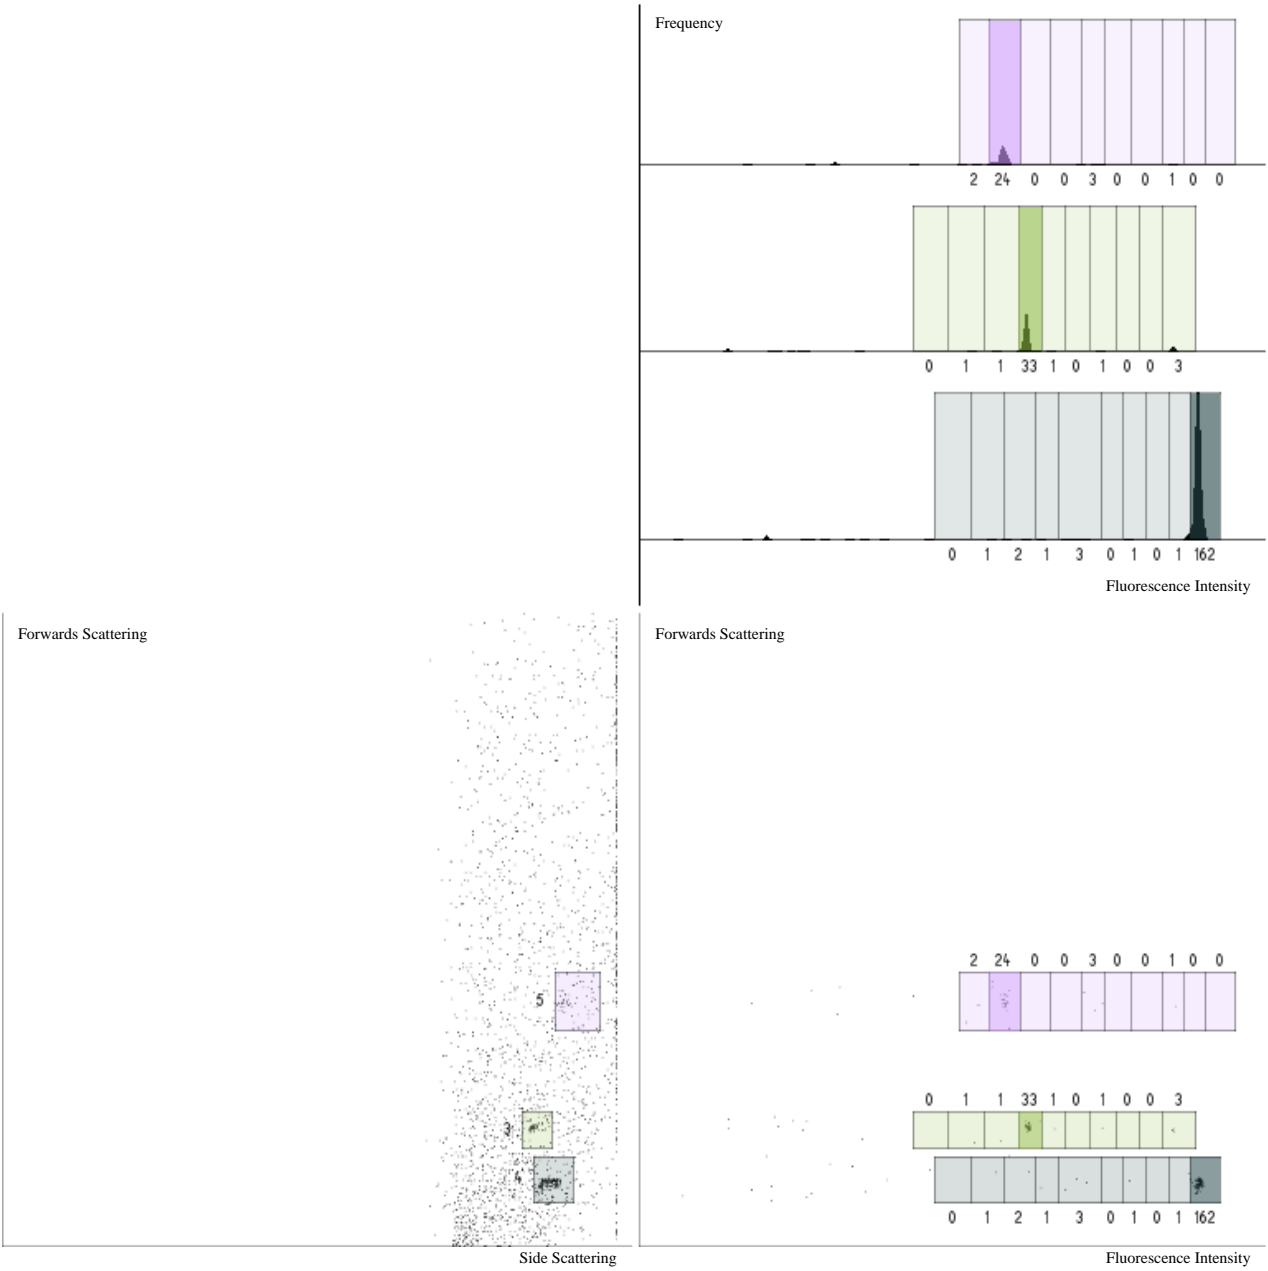

ANNEX 3: TAG DECONVOLUTION - BEAD 462

Passes flow sorting criteria: Yes  
Passes tag deconvolution criteria: Yes  
Included in protocol analysis: Yes  
Protocol: 7, 5, 9, 9  
Filename: Bin9\_plateA0\_C12.fcs  
Split 1: Petrol shading  
Split 2: Green shading  
Split 3: Violet shading

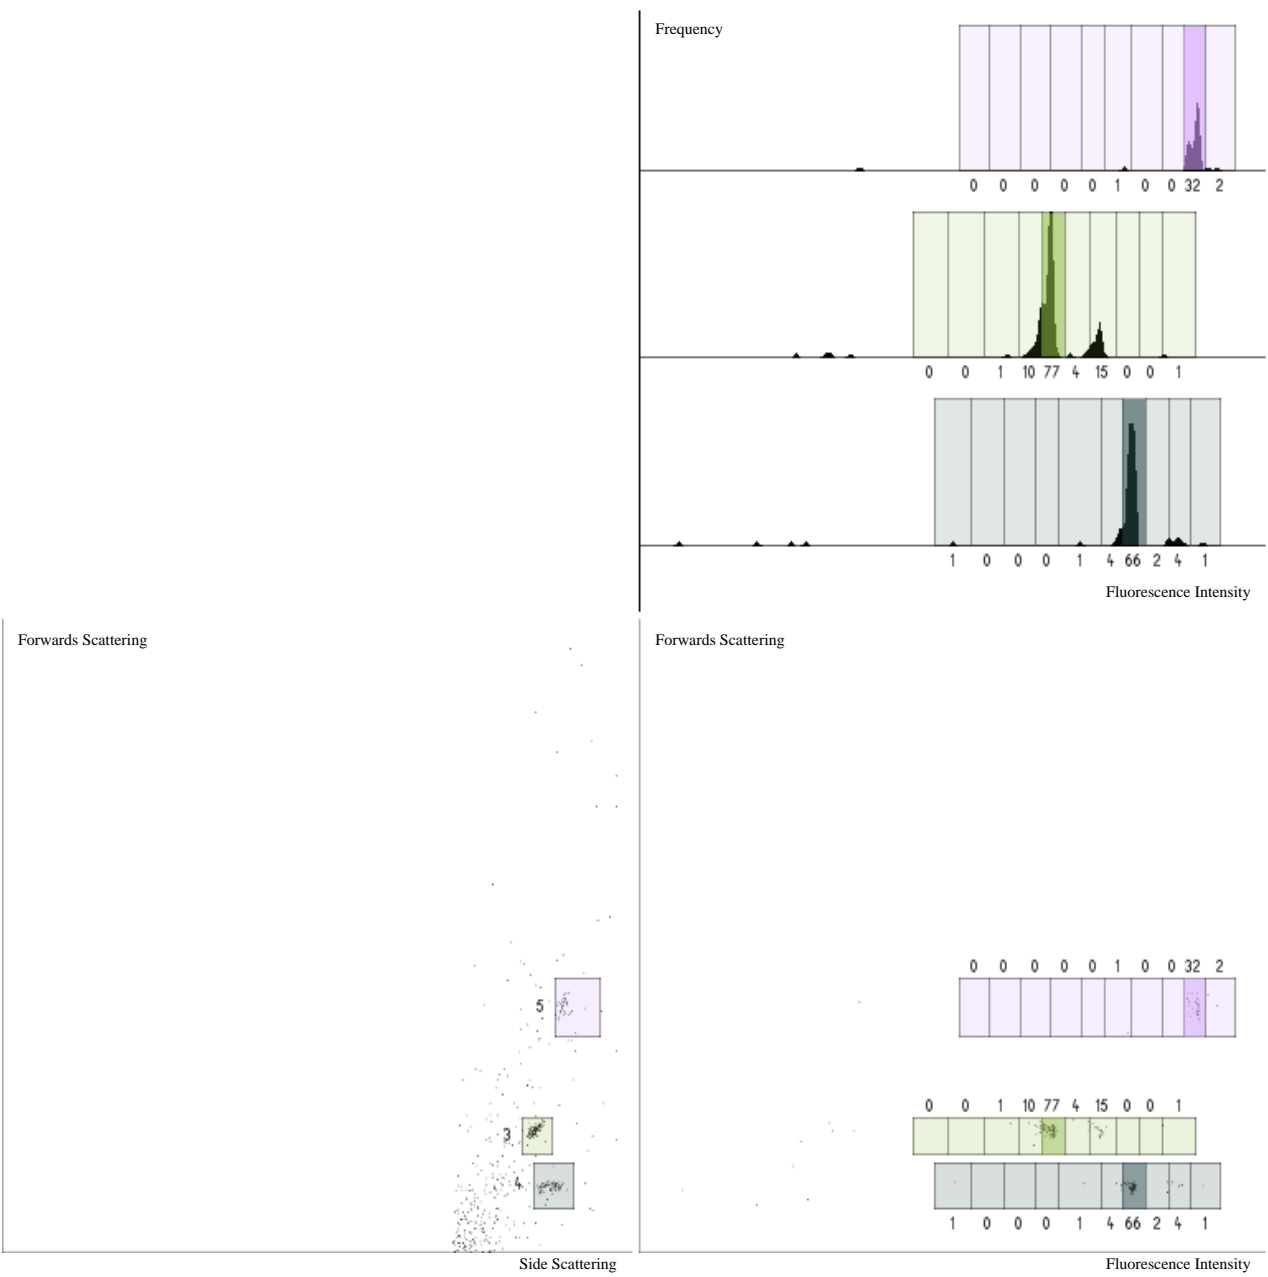



ANNEX 3: TAG DECONVOLUTION - BEAD 463

Passes flow sorting criteria: Yes  
Passes tag deconvolution criteria: Yes  
Included in protocol analysis: Yes  
Protocol: 9, 4, 1, 9  
Filename: Bin9\_plateA0\_D1.fcs  
Split 1: Petrol shading  
Split 2: Green shading  
Split 3: Violet shading

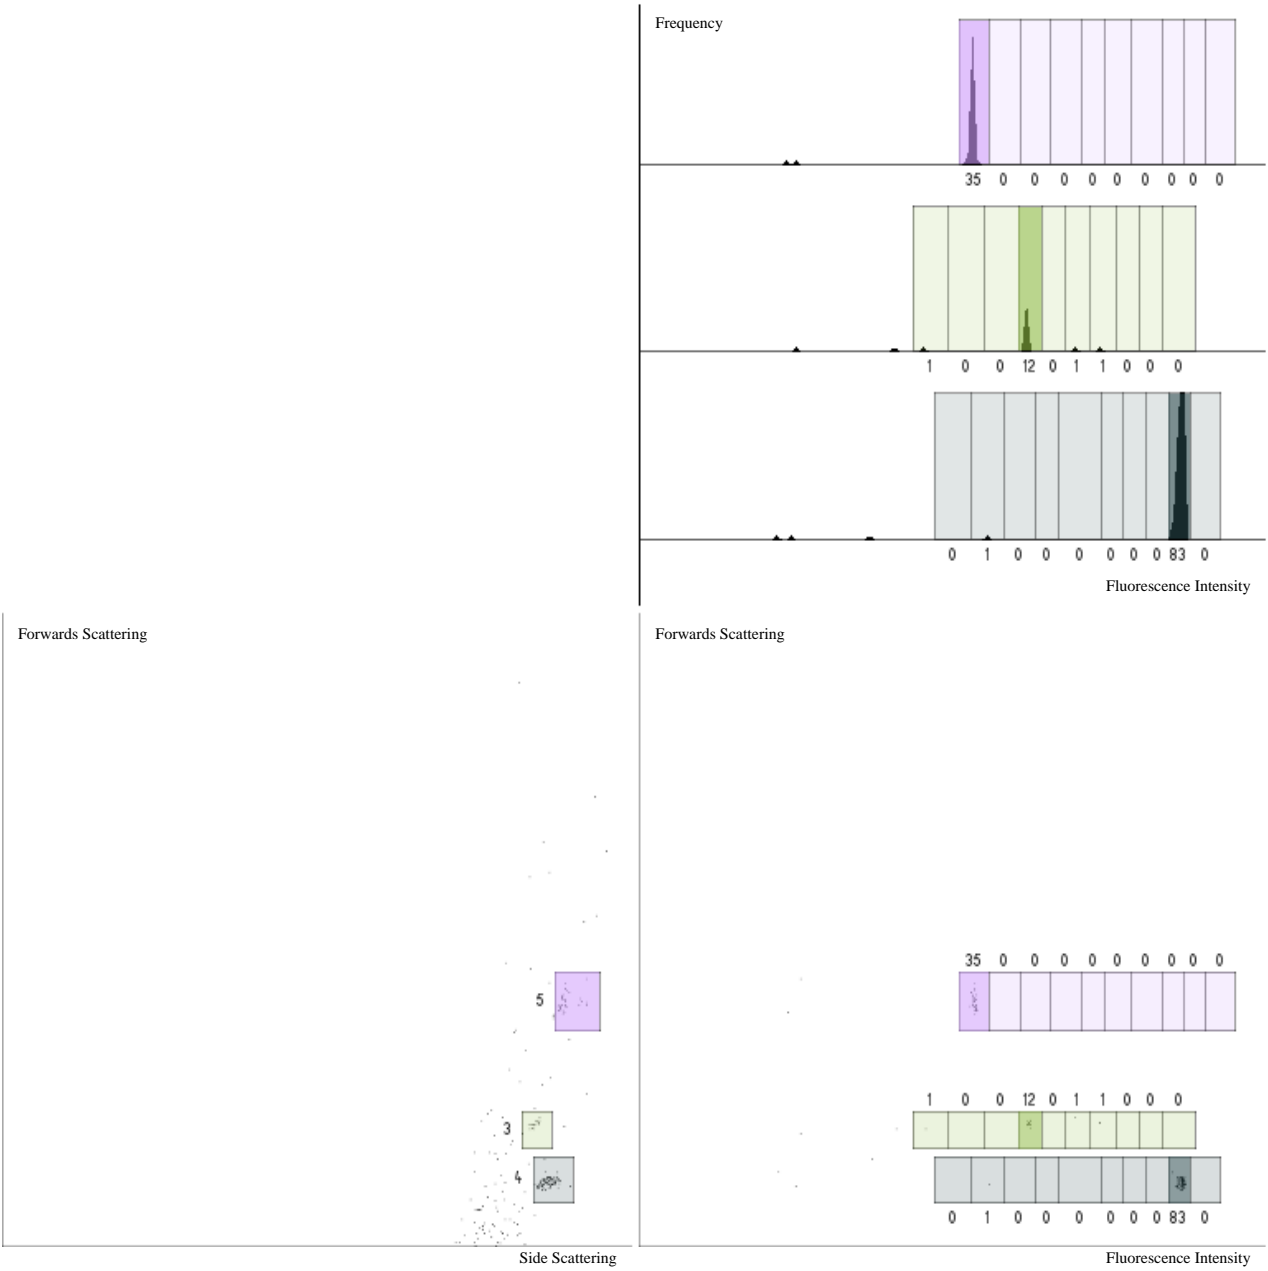

ANNEX 3: TAG DECONVOLUTION - BEAD 464

Passes flow sorting criteria: Yes  
Passes tag deconvolution criteria: No  
Included in protocol analysis: No  
Protocol: N/A  
Filename: Bin9\_plateA0\_D2.fcs  
Split 1: Petrol shading  
Split 2: Green shading  
Split 3: Violet shading

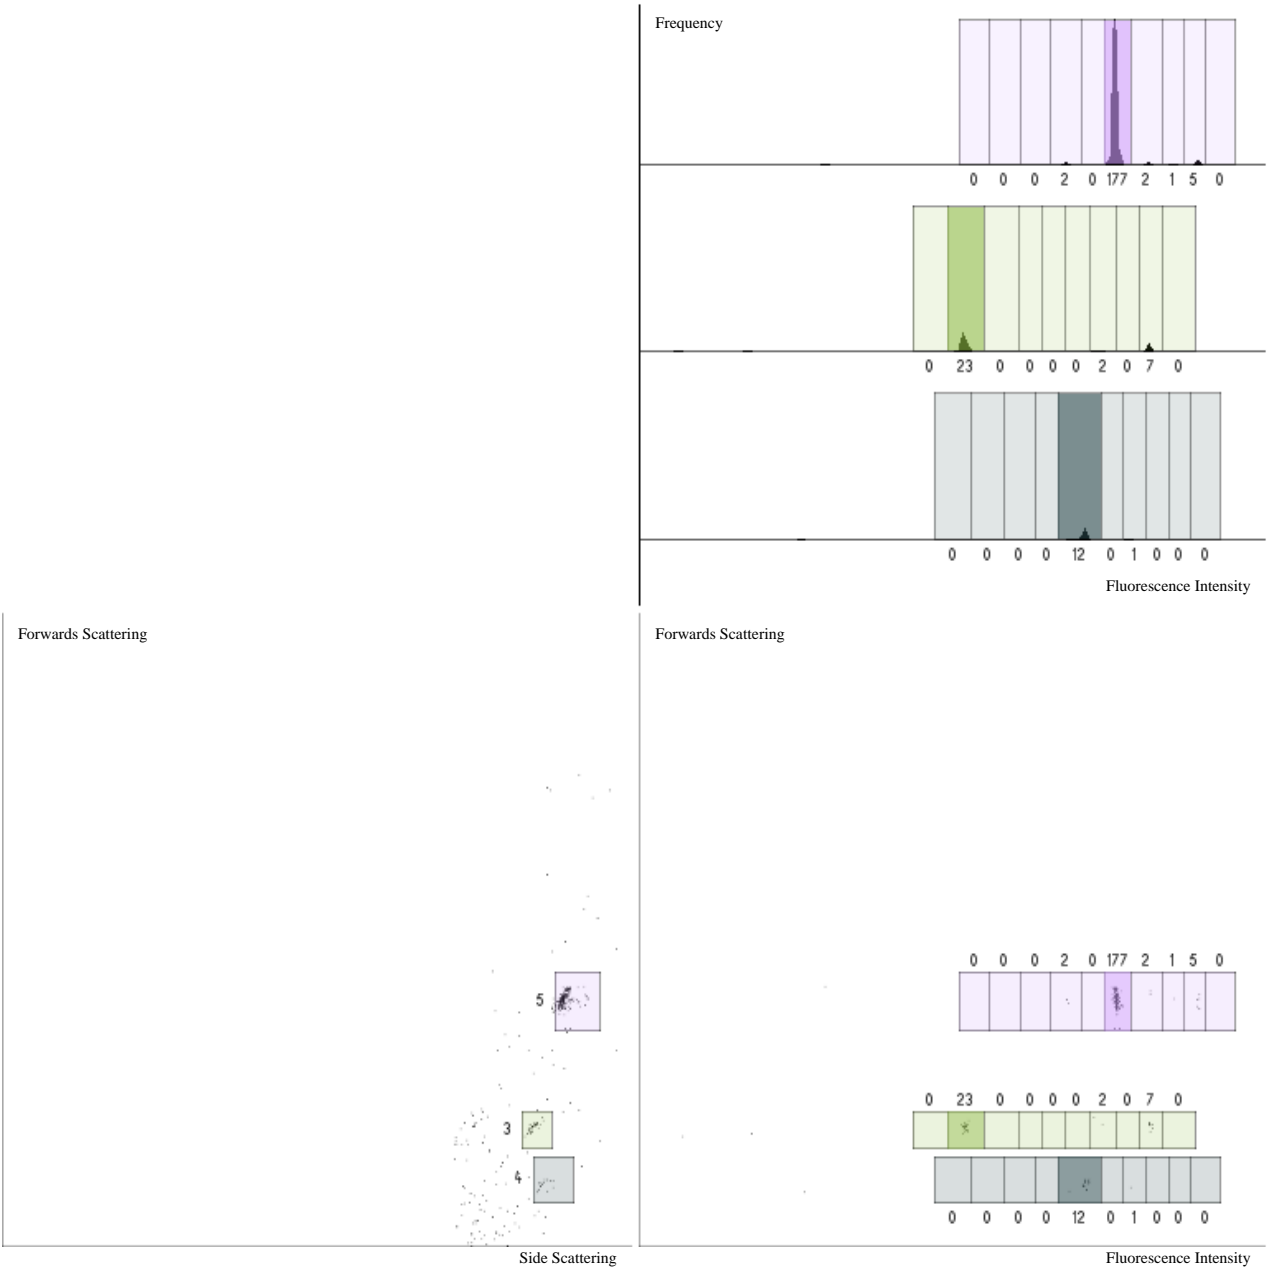

ANNEX 3: TAG DECONVOLUTION - BEAD 465

Passes flow sorting criteria: Yes  
Passes tag deconvolution criteria: Yes  
Included in protocol analysis: Yes  
Protocol: 6, 10, 1, 9  
Filename: Bin9\_plateA0\_D3.fcs  
Split 1: Petrol shading  
Split 2: Green shading  
Split 3: Violet shading

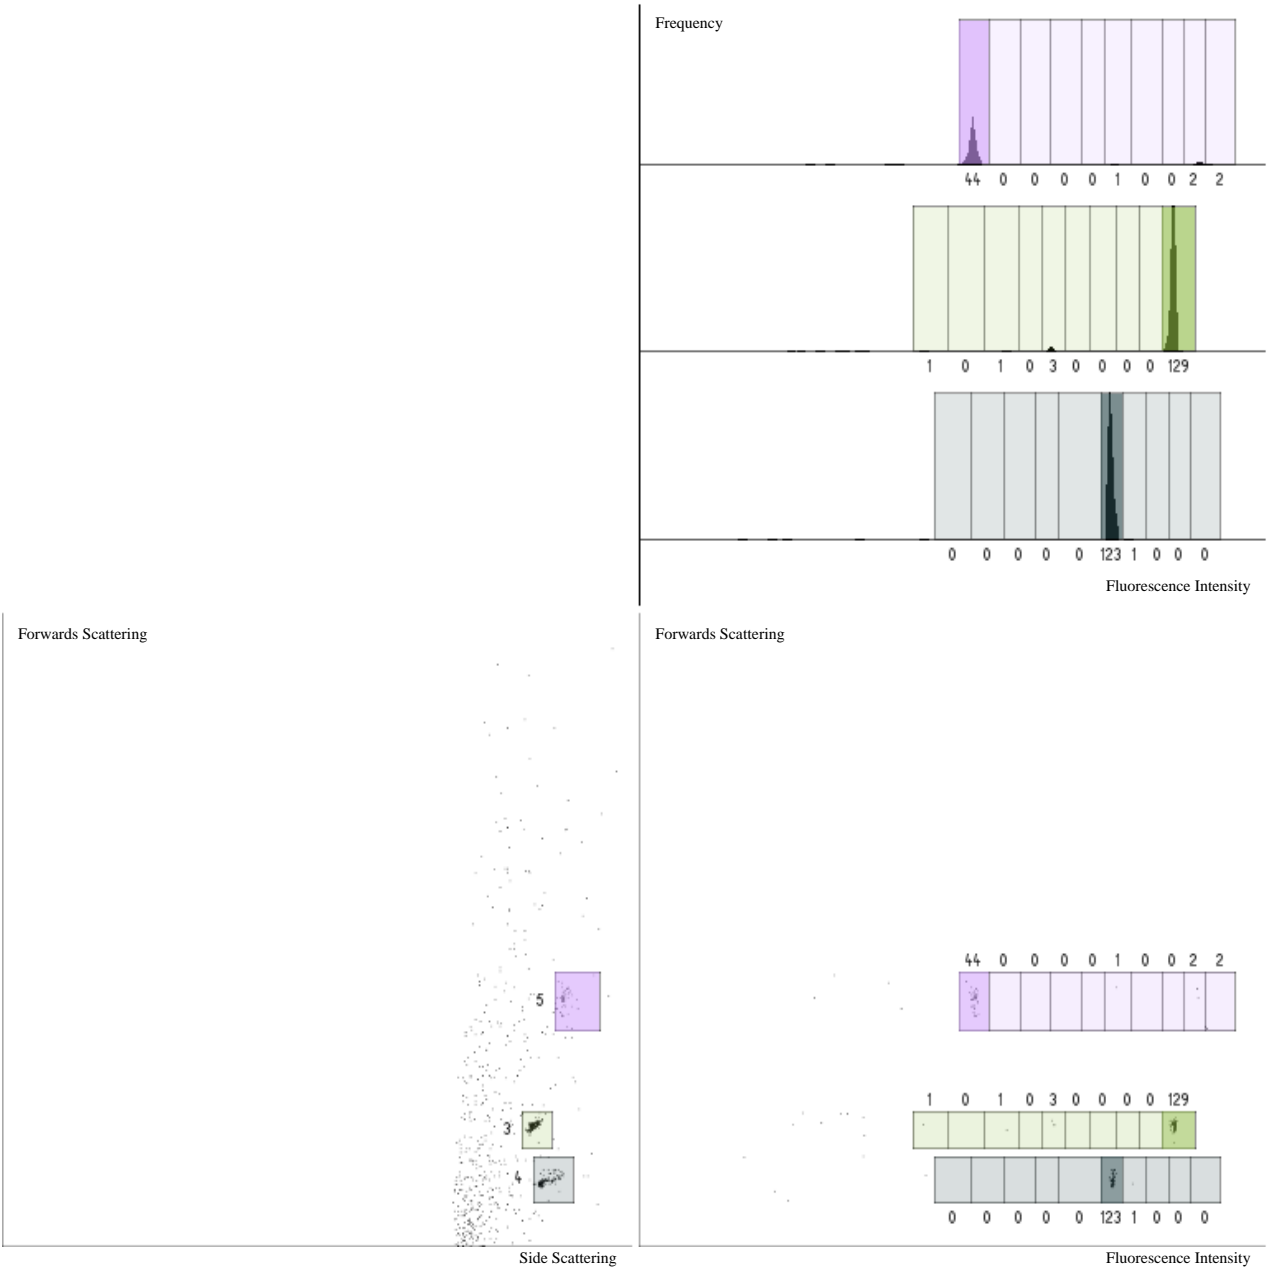

ANNEX 3: TAG DECONVOLUTION - BEAD 466

Passes flow sorting criteria: Yes  
Passes tag deconvolution criteria: No  
Included in protocol analysis: No  
Protocol: N/A  
Filename: Bin9\_plateA0\_D4.fcs  
Split 1: Petrol shading  
Split 2: Green shading  
Split 3: Violet shading

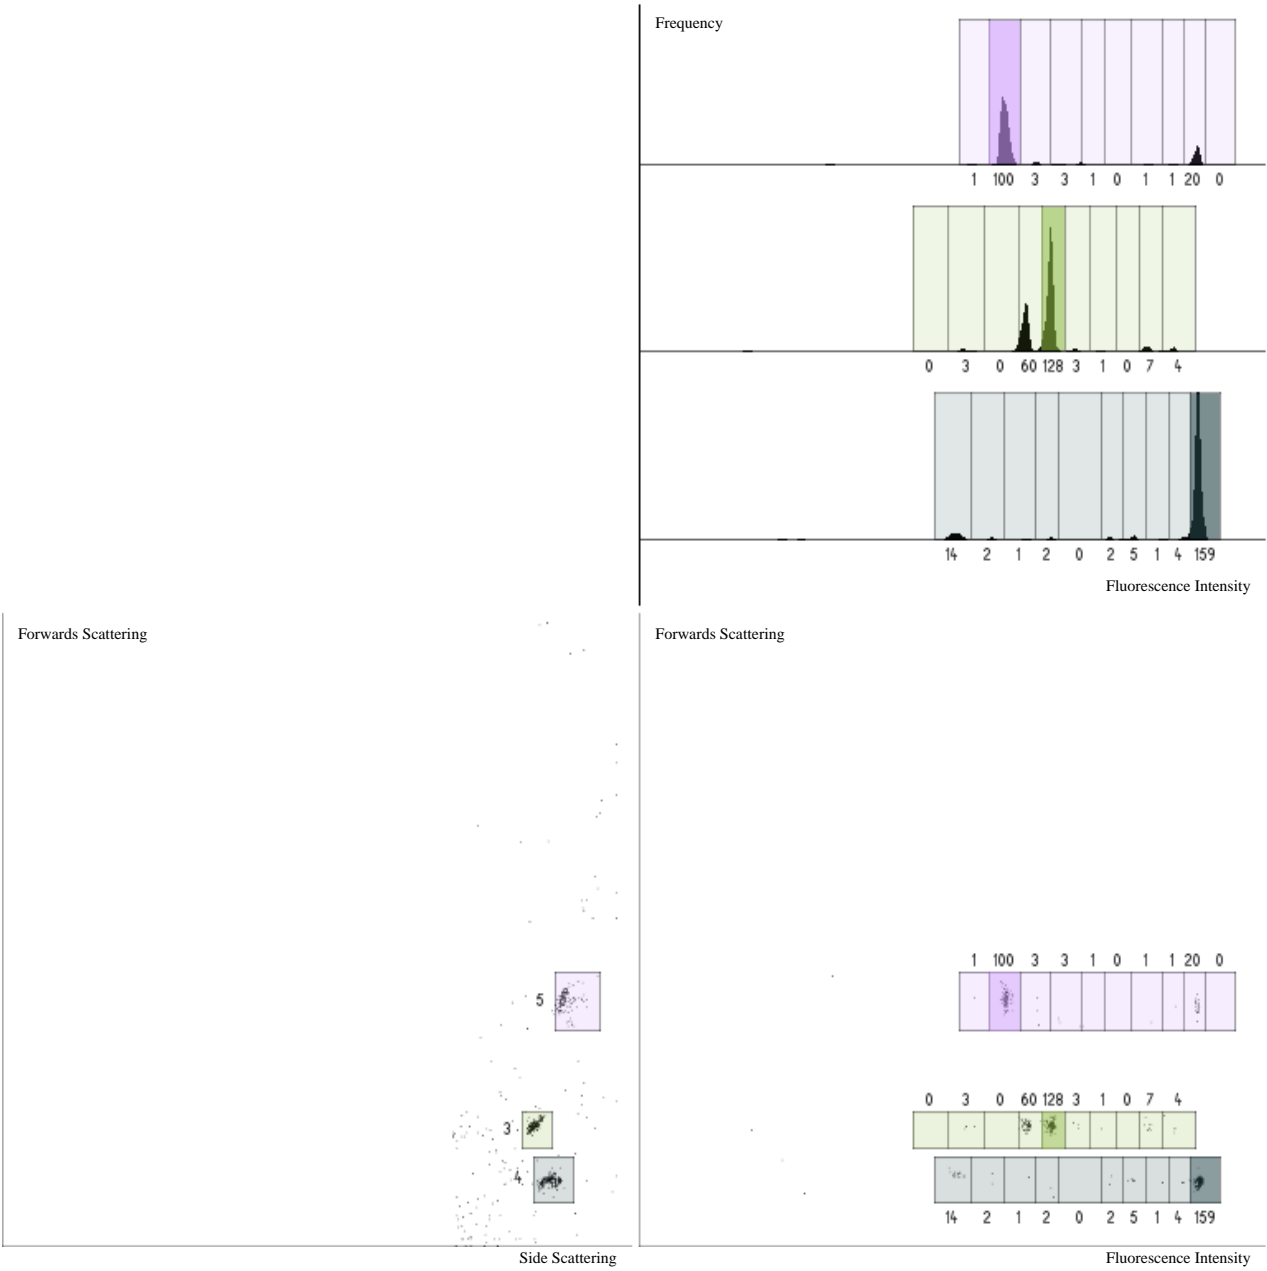

ANNEX 3: TAG DECONVOLUTION - BEAD 467

Passes flow sorting criteria: Yes  
Passes tag deconvolution criteria: Yes  
Included in protocol analysis: Yes  
Protocol: 1, 5, 1, 9  
Filename: Bin9\_plateA0\_D5.fcs  
Split 1: Petrol shading  
Split 2: Green shading  
Split 3: Violet shading

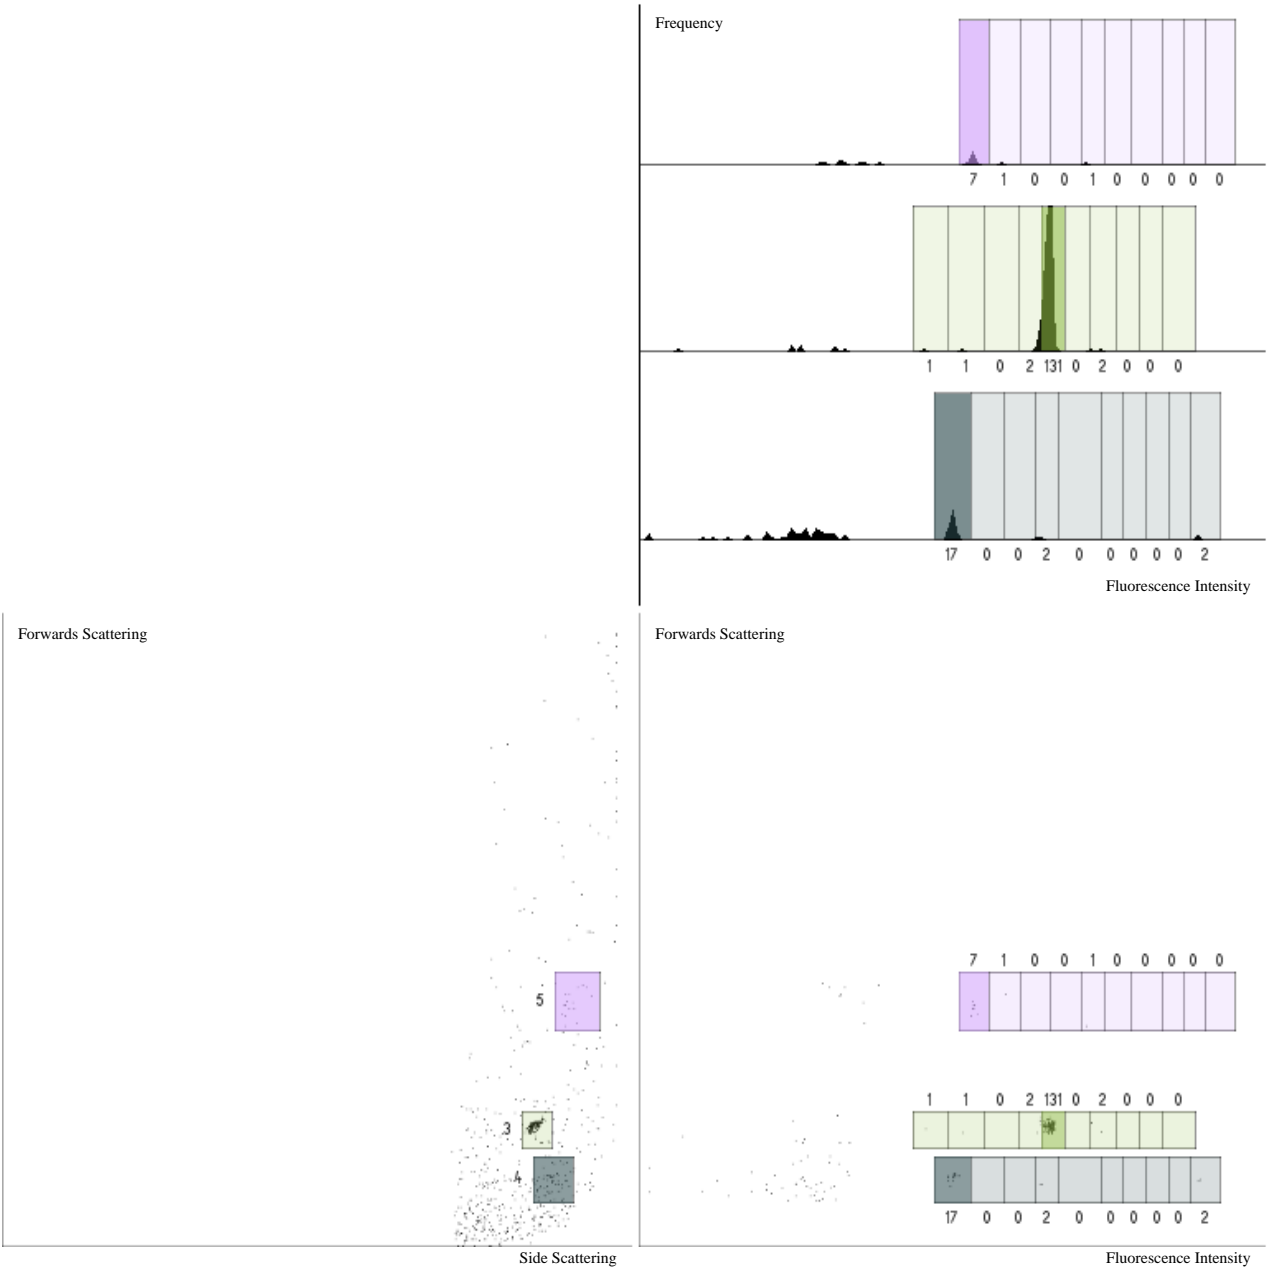

ANNEX 3: TAG DECONVOLUTION - BEAD 468

Passes flow sorting criteria: Yes  
Passes tag deconvolution criteria: Yes  
Included in protocol analysis: Yes  
Protocol: 6, 8, 5, 9  
Filename: Bin9\_plateA0\_D6.fcs  
Split 1: Petrol shading  
Split 2: Green shading  
Split 3: Violet shading

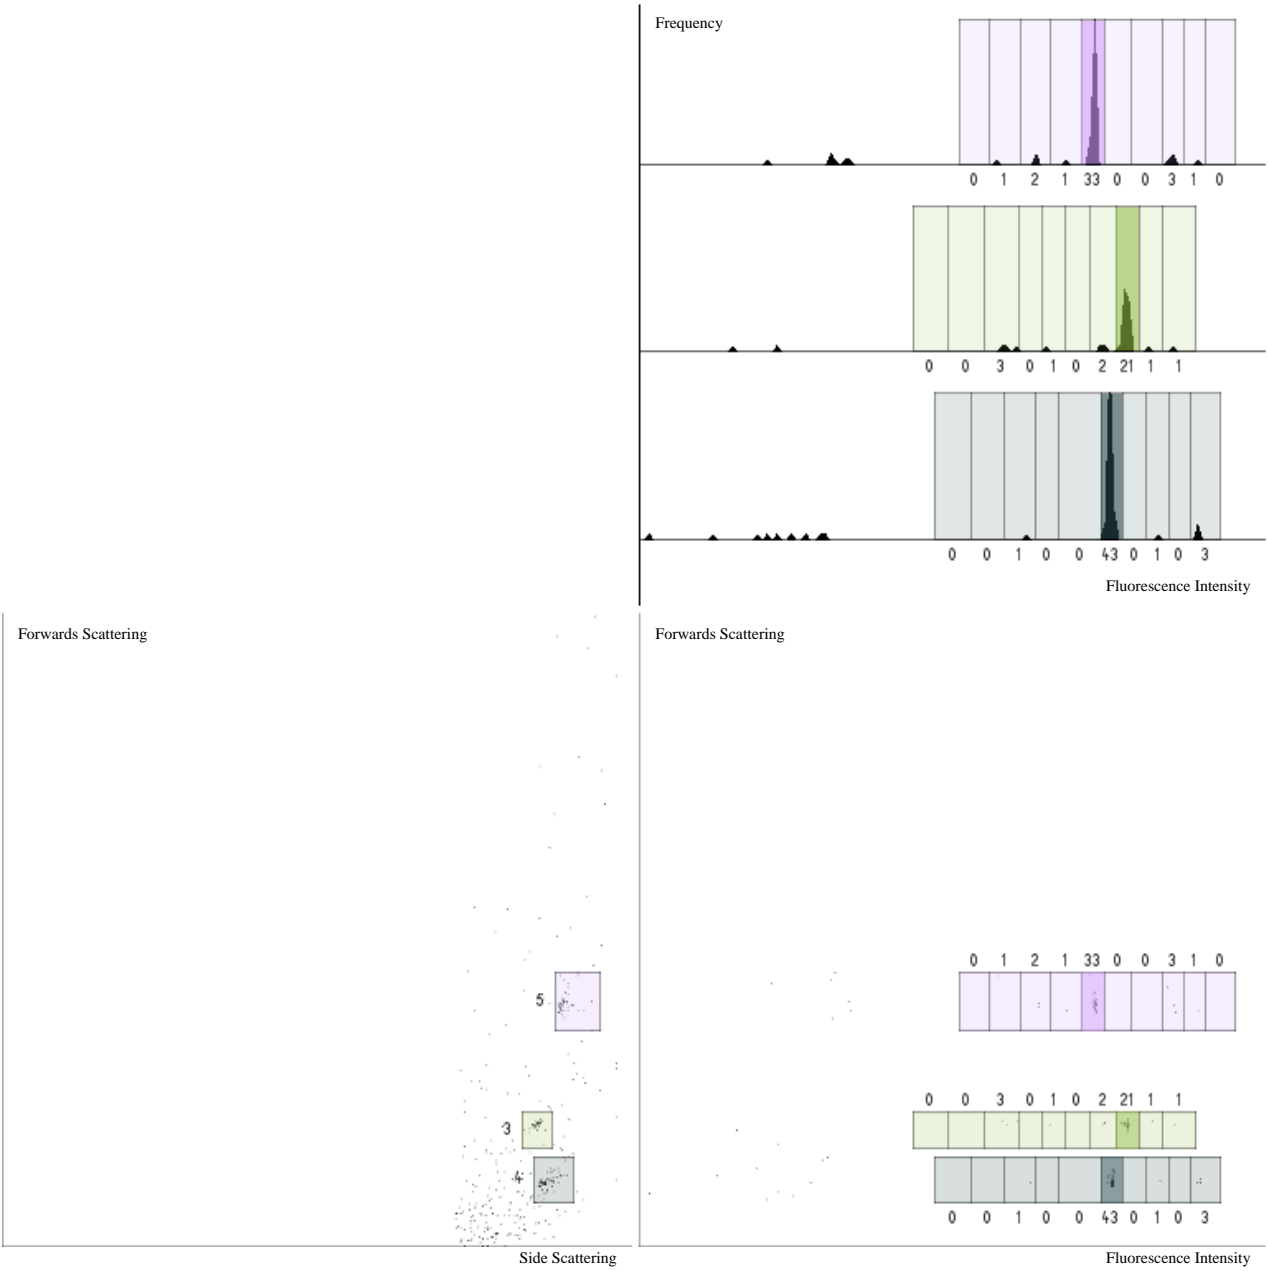

ANNEX 3: TAG DECONVOLUTION - BEAD 469

Passes flow sorting criteria: Yes  
Passes tag deconvolution criteria: Yes  
Included in protocol analysis: Yes  
Protocol: 2, 4, 1, 9  
Filename: Bin9\_plateA0\_H12.fcs  
Split 1: Petrol shading  
Split 2: Green shading  
Split 3: Violet shading

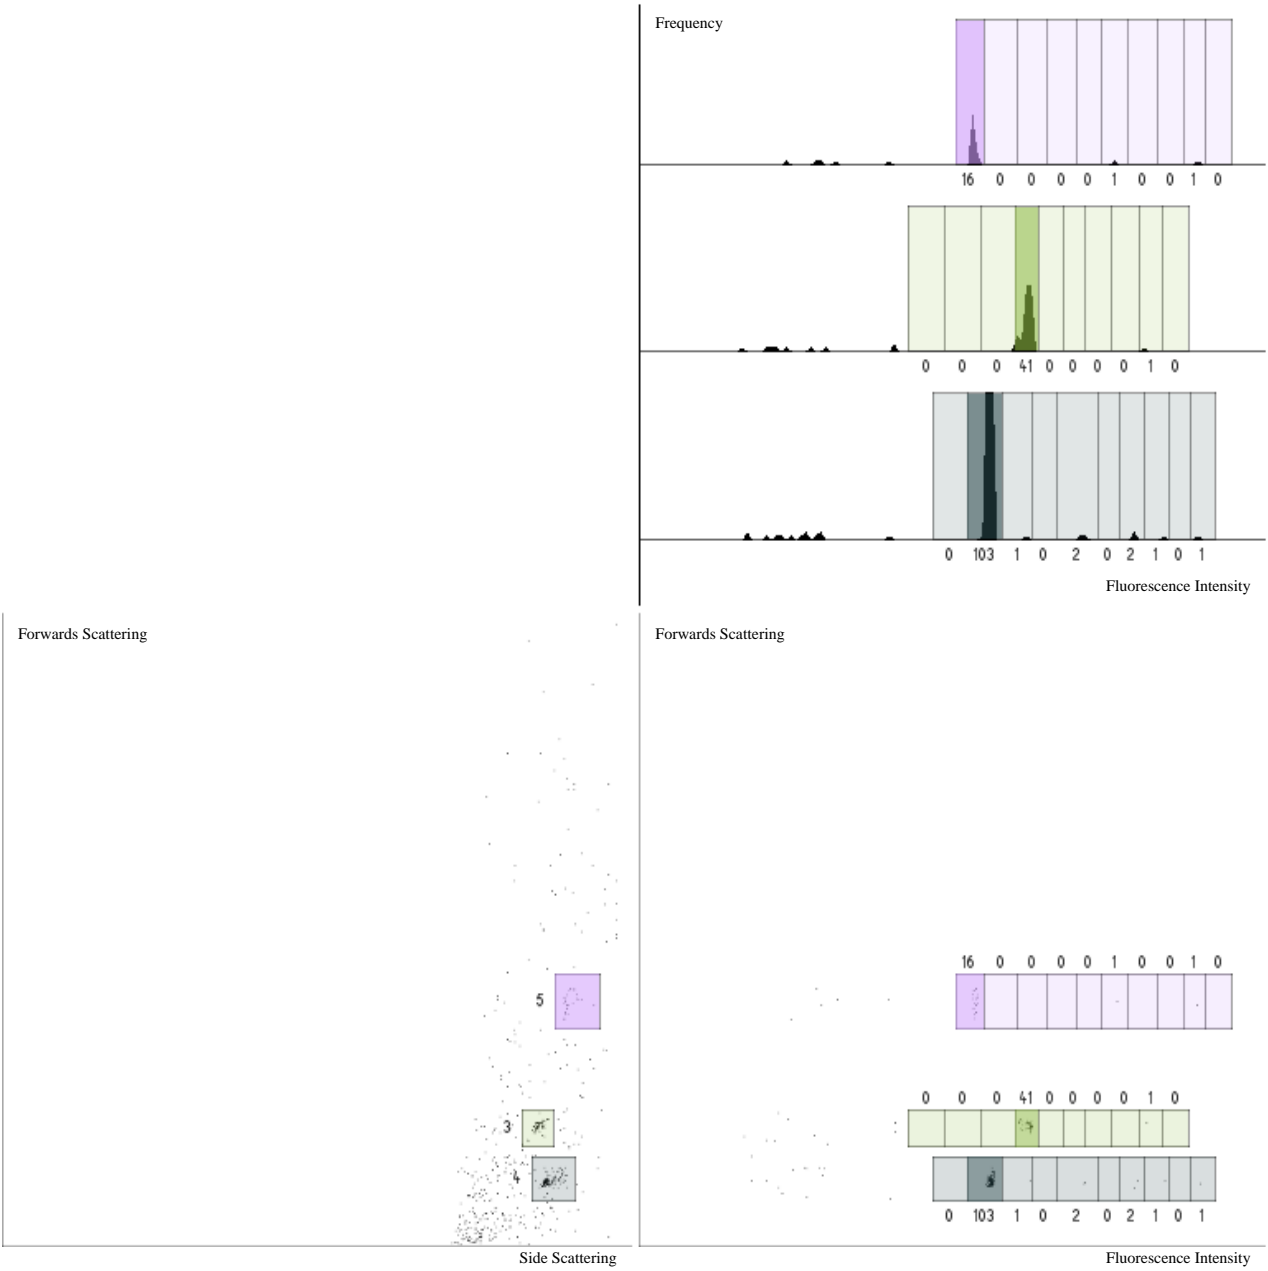

ANNEX 3: TAG DECONVOLUTION - BEAD 470

Passes flow sorting criteria: Yes  
Passes tag deconvolution criteria: No  
Included in protocol analysis: No  
Protocol: N/A  
Filename: Bin9\_plateA0\_D8.fcs  
Split 1: Petrol shading  
Split 2: Green shading  
Split 3: Violet shading

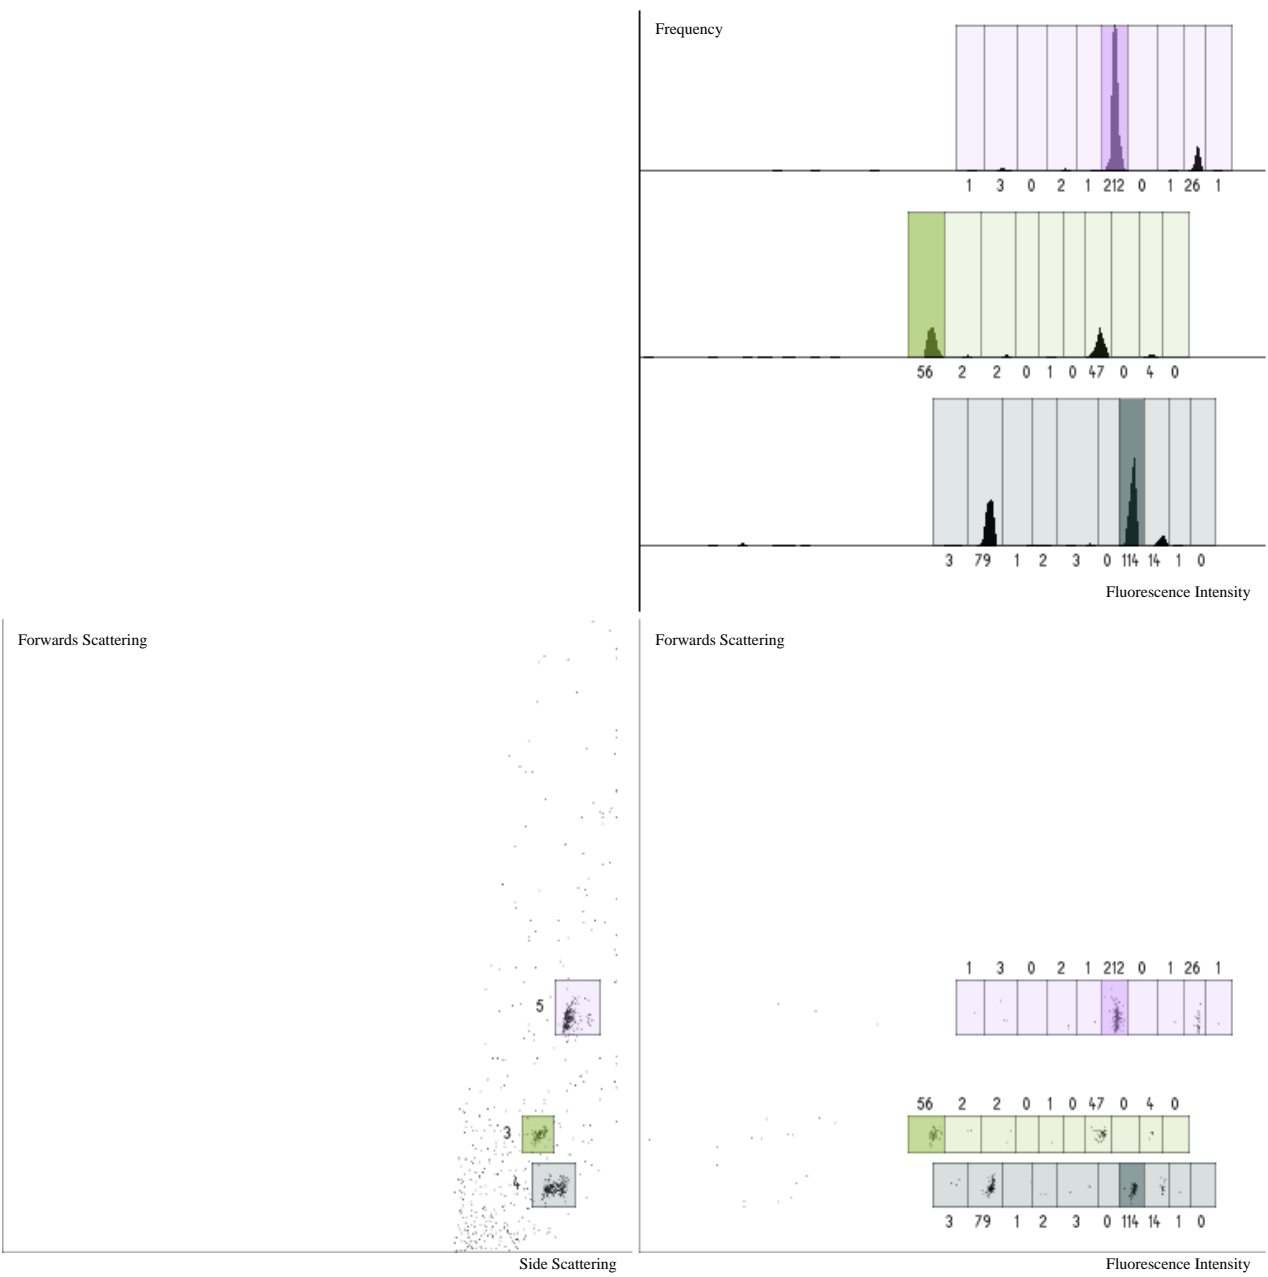



ANNEX 3: TAG DECONVOLUTION - BEAD 471

Passes flow sorting criteria: Yes  
Passes tag deconvolution criteria: No  
Included in protocol analysis: No  
Protocol: N/A  
Filename: Bin9\_plateA0\_D9.fcs  
Split 1: Petrol shading  
Split 2: Green shading  
Split 3: Violet shading

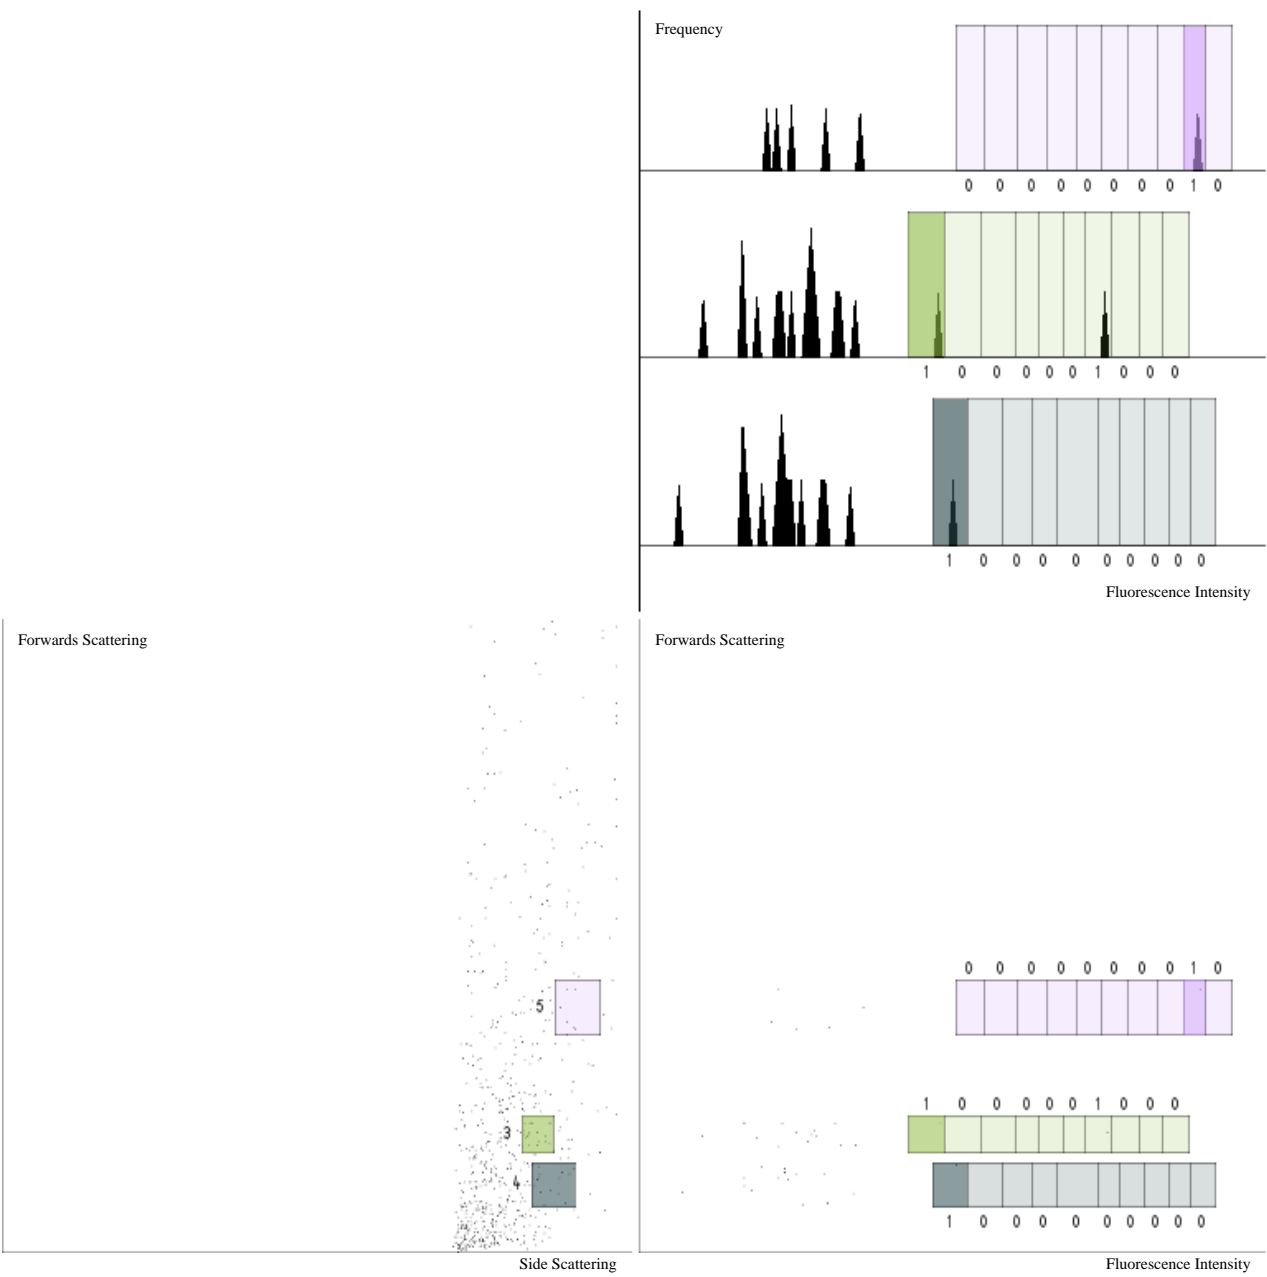

ANNEX 3: TAG DECONVOLUTION - BEAD 472

Passes flow sorting criteria: Yes  
Passes tag deconvolution criteria: Yes  
Included in protocol analysis: Yes  
Protocol: 5, 2, 8, 9  
Filename: Bin9\_plateA0\_D10.fcs  
Split 1: Petrol shading  
Split 2: Green shading  
Split 3: Violet shading

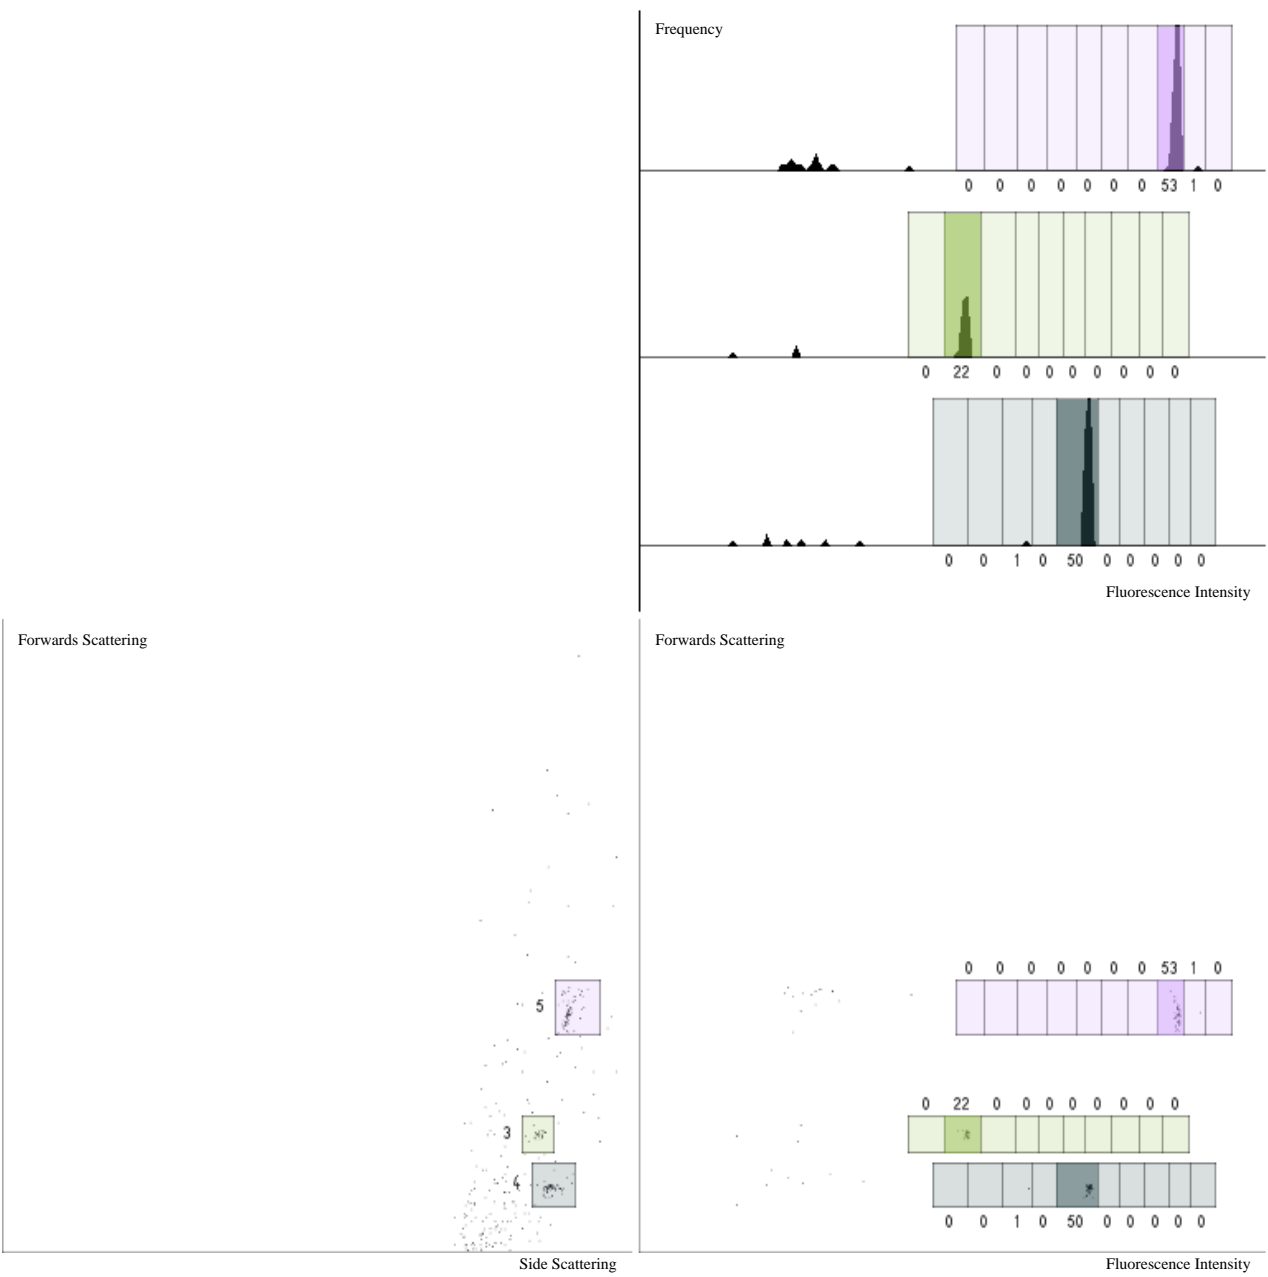

ANNEX 3: TAG DECONVOLUTION - BEAD 473

Passes flow sorting criteria: Yes  
Passes tag deconvolution criteria: Yes  
Included in protocol analysis: Yes  
Protocol: 7, 7, 3, 9  
Filename: Bin9\_plateA0\_D11.fcs  
Split 1: Petrol shading  
Split 2: Green shading  
Split 3: Violet shading

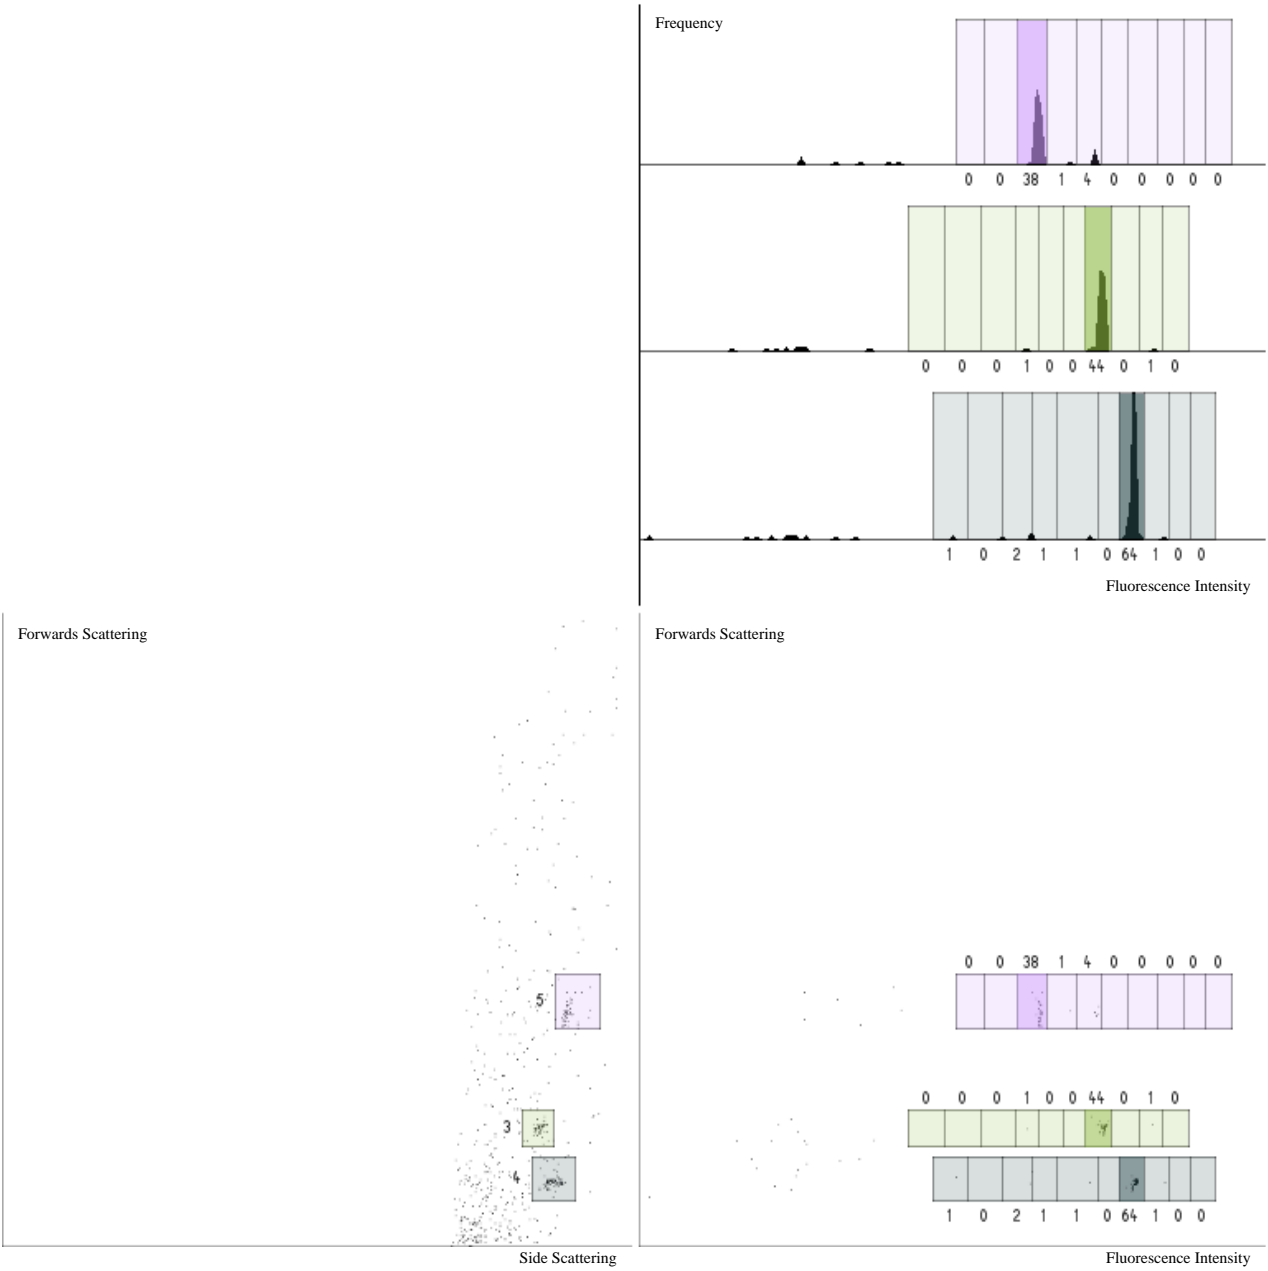

ANNEX 3: TAG DECONVOLUTION - BEAD 474

Passes flow sorting criteria: Yes  
Passes tag deconvolution criteria: Yes  
Included in protocol analysis: Yes  
Protocol: 10, 5, 5, 9  
Filename: Bin9\_plateA0\_D12.fcs  
Split 1: Petrol shading  
Split 2: Green shading  
Split 3: Violet shading

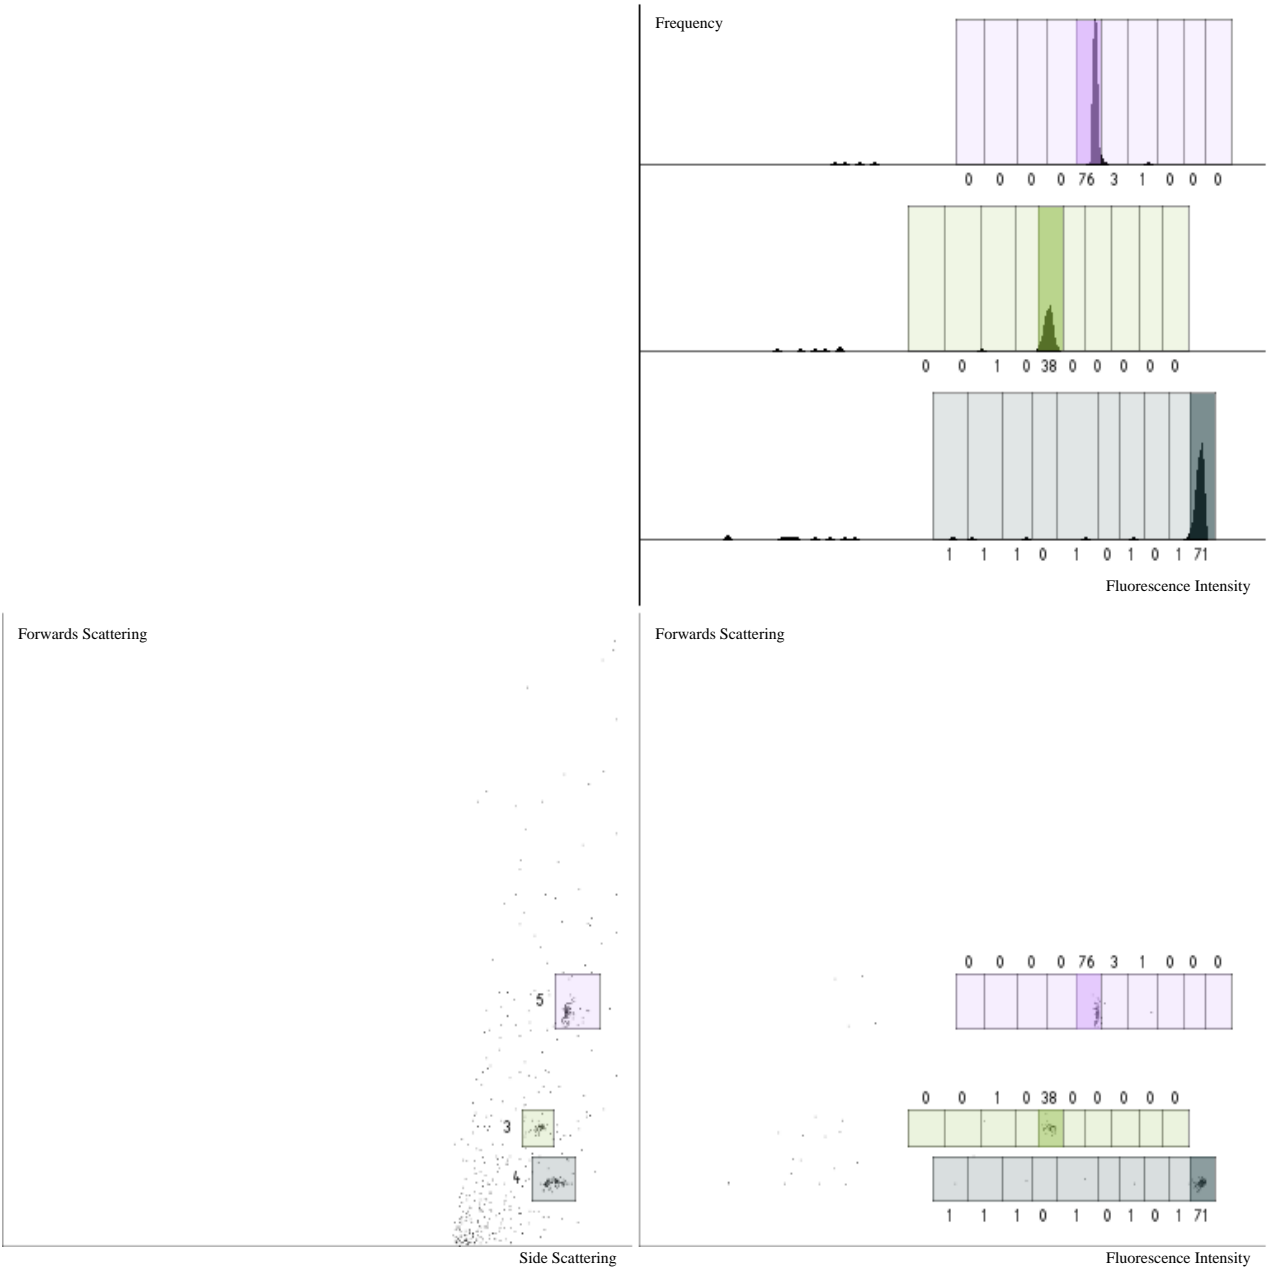

ANNEX 3: TAG DECONVOLUTION - BEAD 475

Passes flow sorting criteria: Yes  
Passes tag deconvolution criteria: Yes  
Included in protocol analysis: Yes  
Protocol: 2, 5, 1, 9  
Filename: Bin9\_plateA0\_E1.fcs  
Split 1: Petrol shading  
Split 2: Green shading  
Split 3: Violet shading

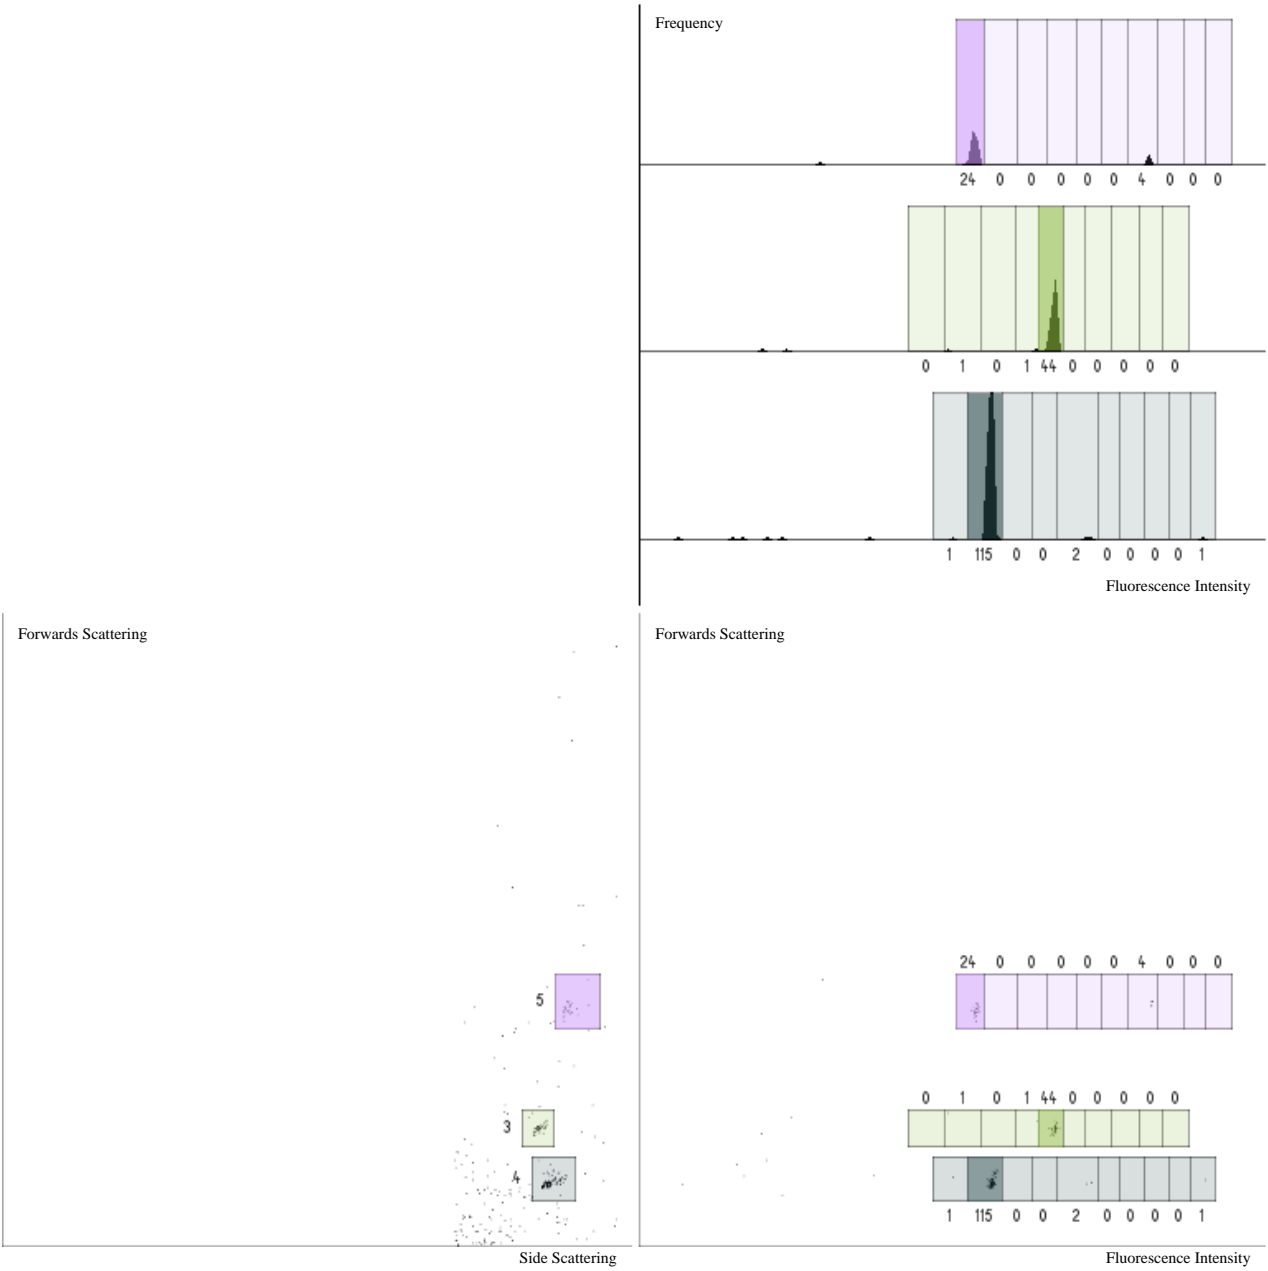

ANNEX 3: TAG DECONVOLUTION - BEAD 476

Passes flow sorting criteria: Yes  
Passes tag deconvolution criteria: Yes  
Included in protocol analysis: Yes  
Protocol: 5, 10, 9, 9  
Filename: Bin9\_plateA0\_E2.fcs  
Split 1: Petrol shading  
Split 2: Green shading  
Split 3: Violet shading

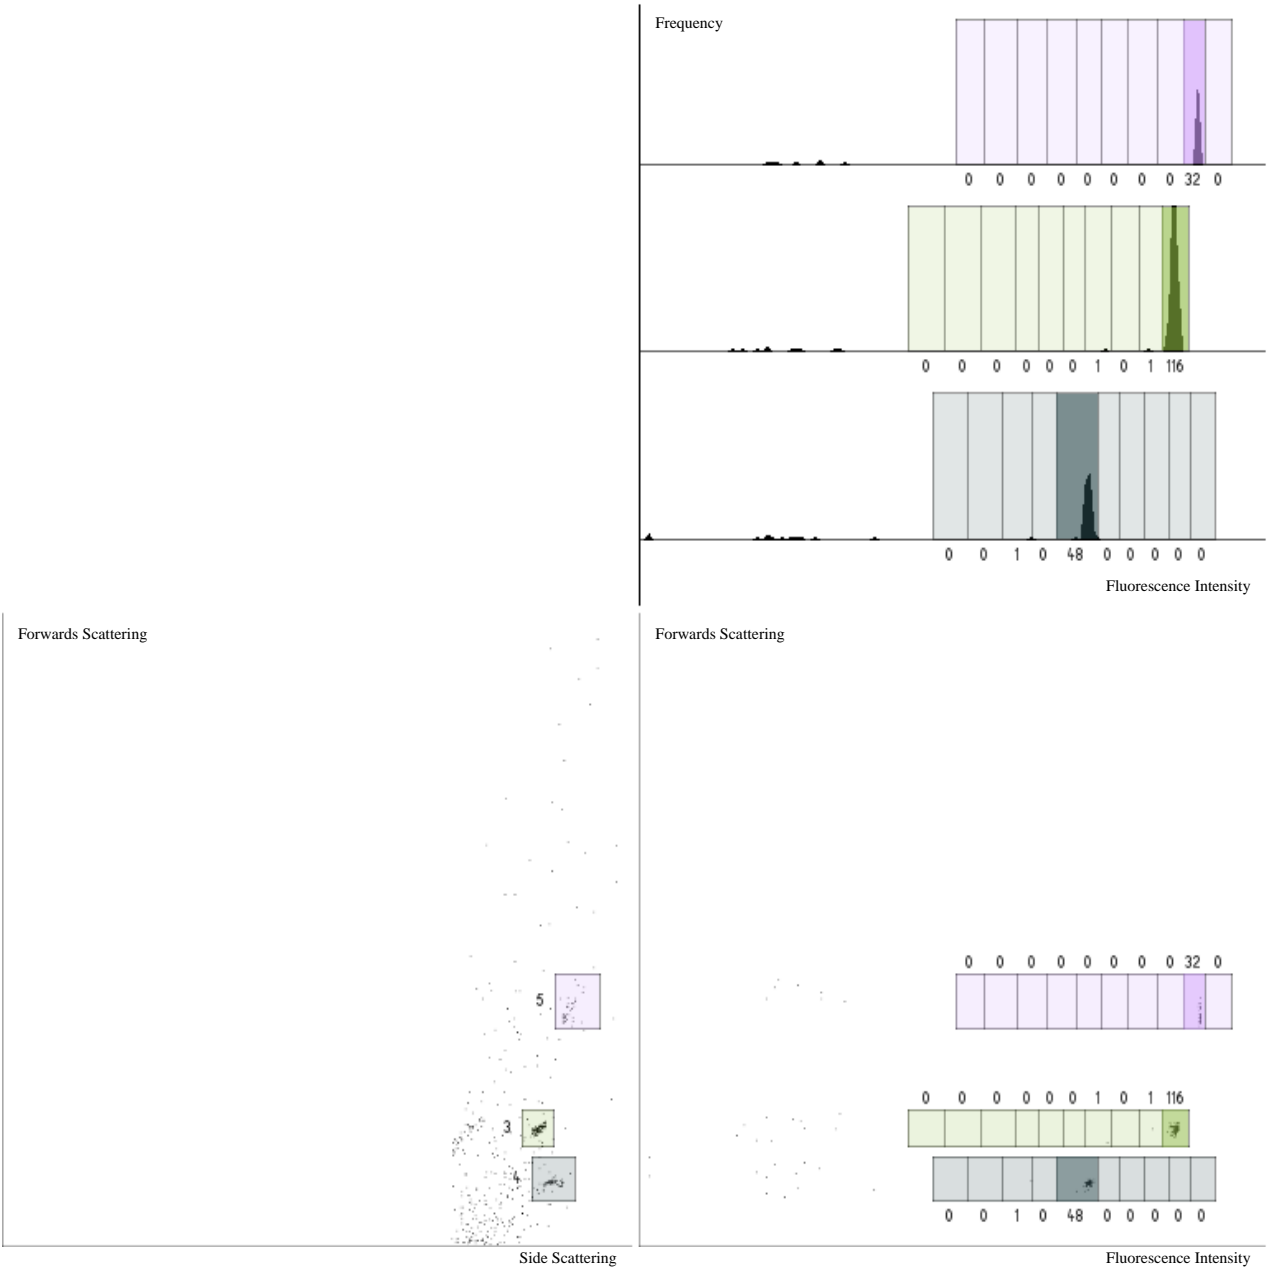

ANNEX 3: TAG DECONVOLUTION - BEAD 477

Passes flow sorting criteria: Yes  
Passes tag deconvolution criteria: Yes  
Included in protocol analysis: Yes  
Protocol: 5, 10, 7, 9  
Filename: Bin9\_plateA0\_E3.fcs  
Split 1: Petrol shading  
Split 2: Green shading  
Split 3: Violet shading

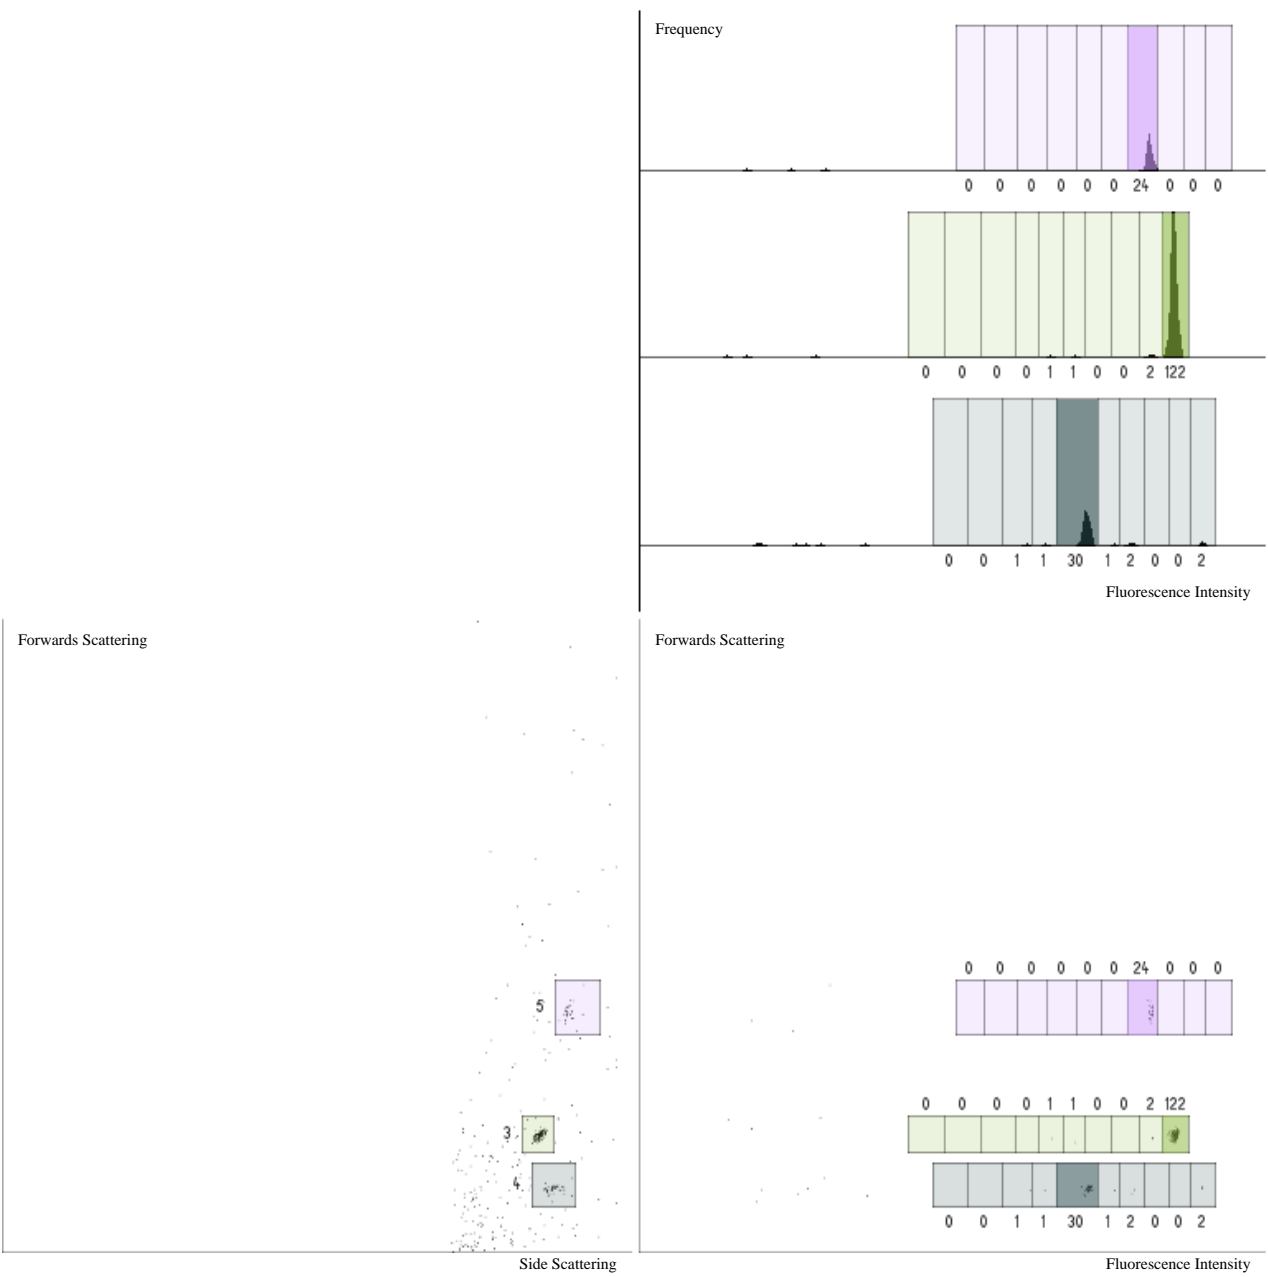

ANNEX 3: TAG DECONVOLUTION - BEAD 478

Passes flow sorting criteria: Yes  
Passes tag deconvolution criteria: Yes  
Included in protocol analysis: Yes  
Protocol: 7, 6, 1, 9  
Filename: Bin9\_plateA0\_E4.fcs  
Split 1: Petrol shading  
Split 2: Green shading  
Split 3: Violet shading

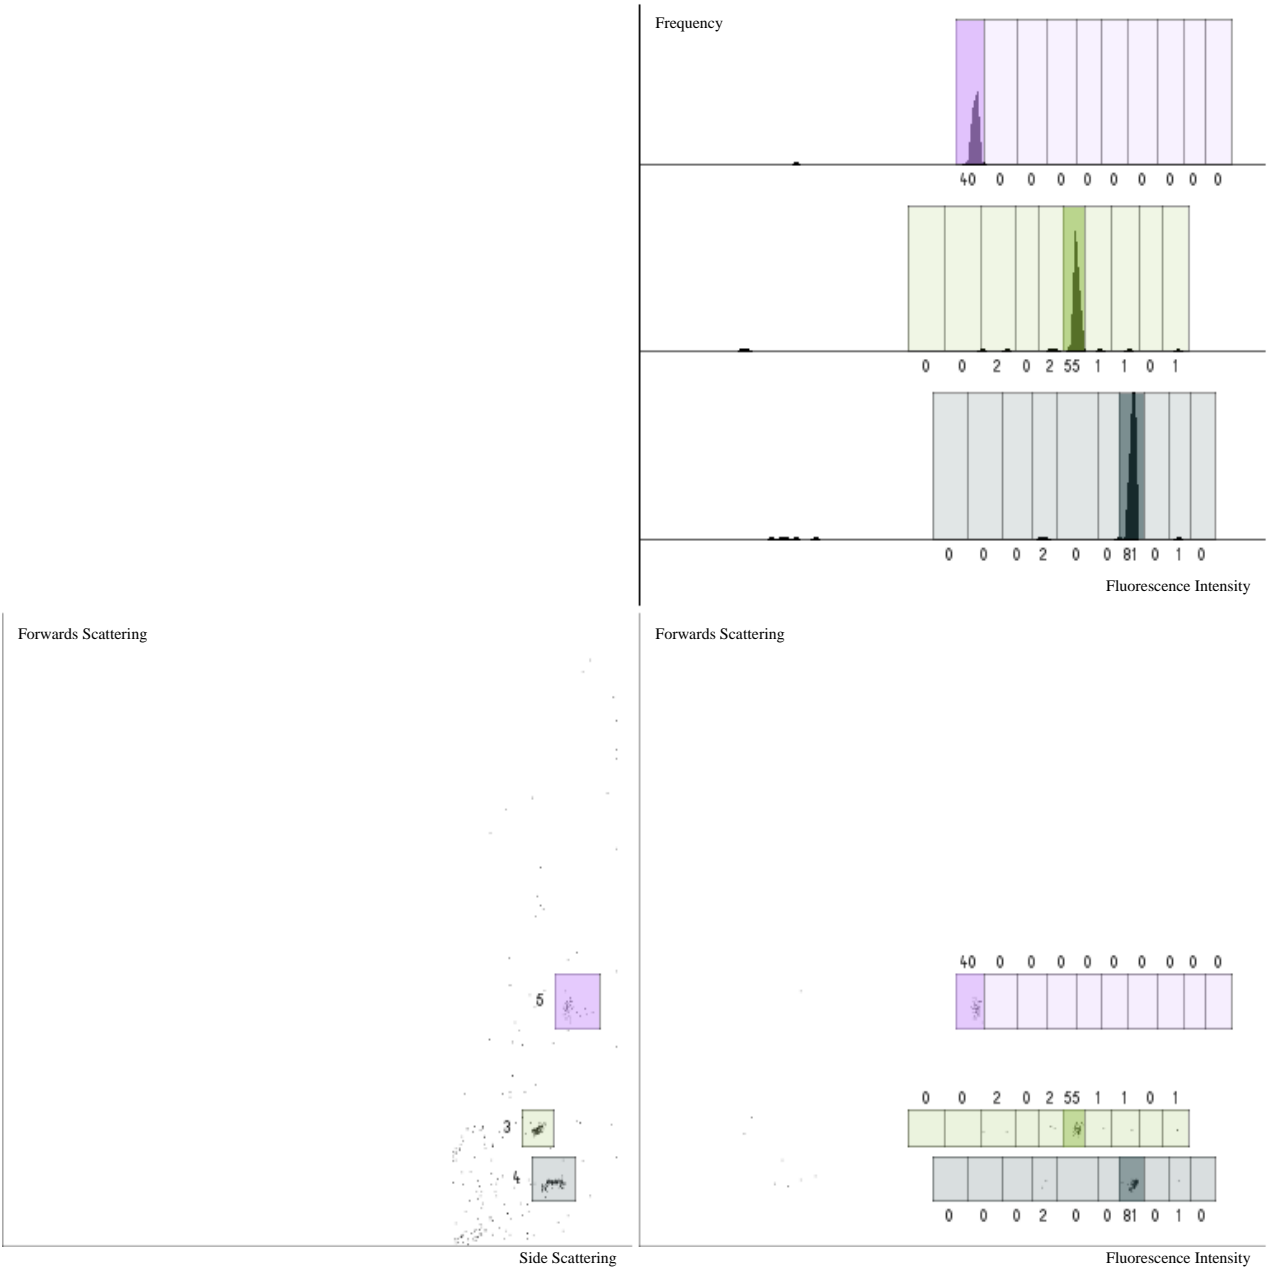



ANNEX 3: TAG DECONVOLUTION - BEAD 479

Passes flow sorting criteria: Yes  
Passes tag deconvolution criteria: No  
Included in protocol analysis: No  
Protocol: N/A  
Filename: Bin9\_plateA0\_E5.fcs  
Split 1: Petrol shading  
Split 2: Green shading  
Split 3: Violet shading

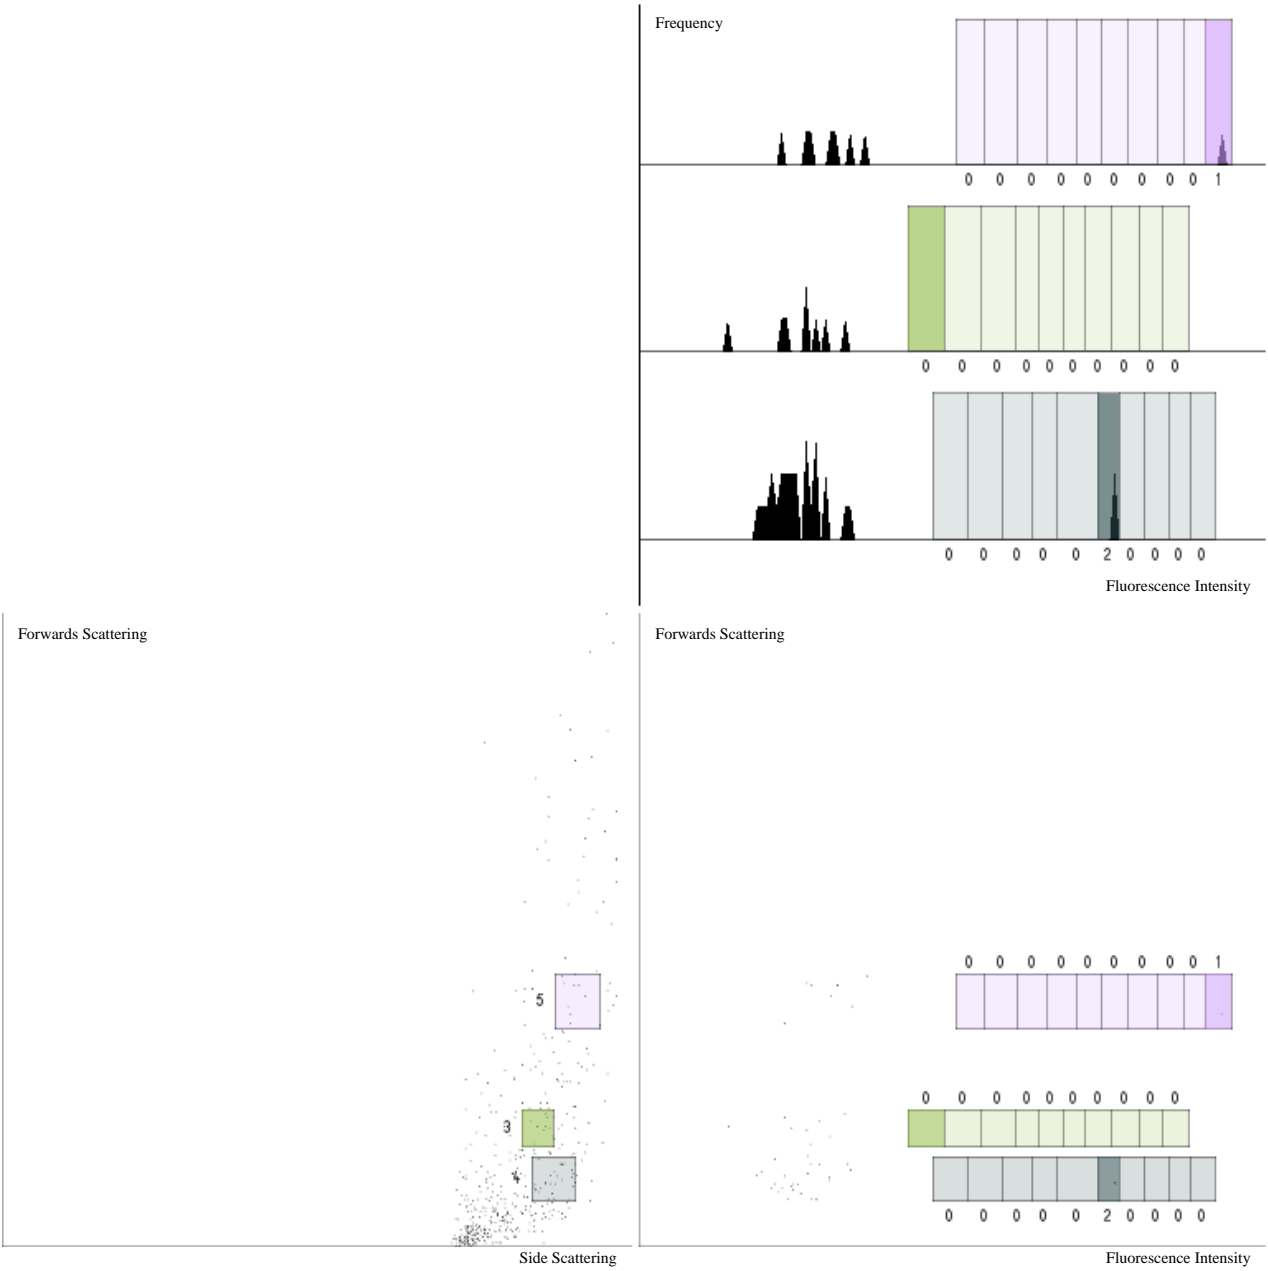

ANNEX 3: TAG DECONVOLUTION - BEAD 480

Passes flow sorting criteria: Yes  
Passes tag deconvolution criteria: Yes  
Included in protocol analysis: Yes  
Protocol: 6, 8, 2, 9  
Filename: Bin9\_plateA0\_E6.fcs  
Split 1: Petrol shading  
Split 2: Green shading  
Split 3: Violet shading

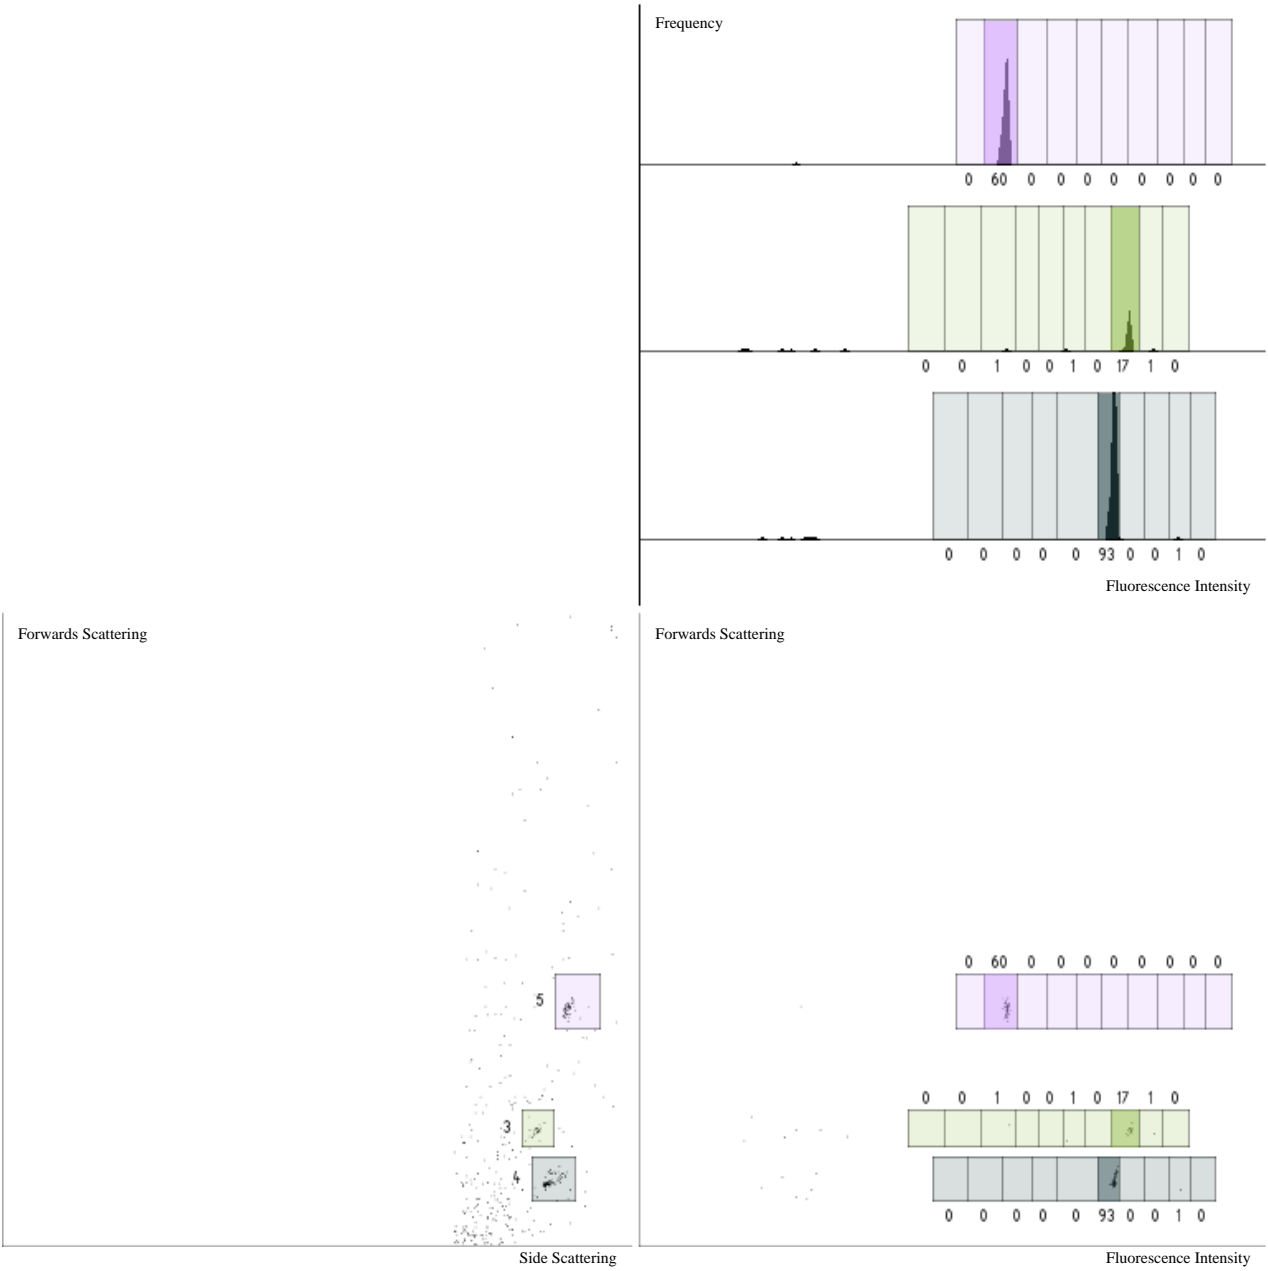

ANNEX 3: TAG DECONVOLUTION - BEAD 481

Passes flow sorting criteria: Yes  
Passes tag deconvolution criteria: Yes  
Included in protocol analysis: Yes  
Protocol: 6, 9, 2, 9  
Filename: Bin9\_plateA0\_E7.fcs  
Split 1: Petrol shading  
Split 2: Green shading  
Split 3: Violet shading

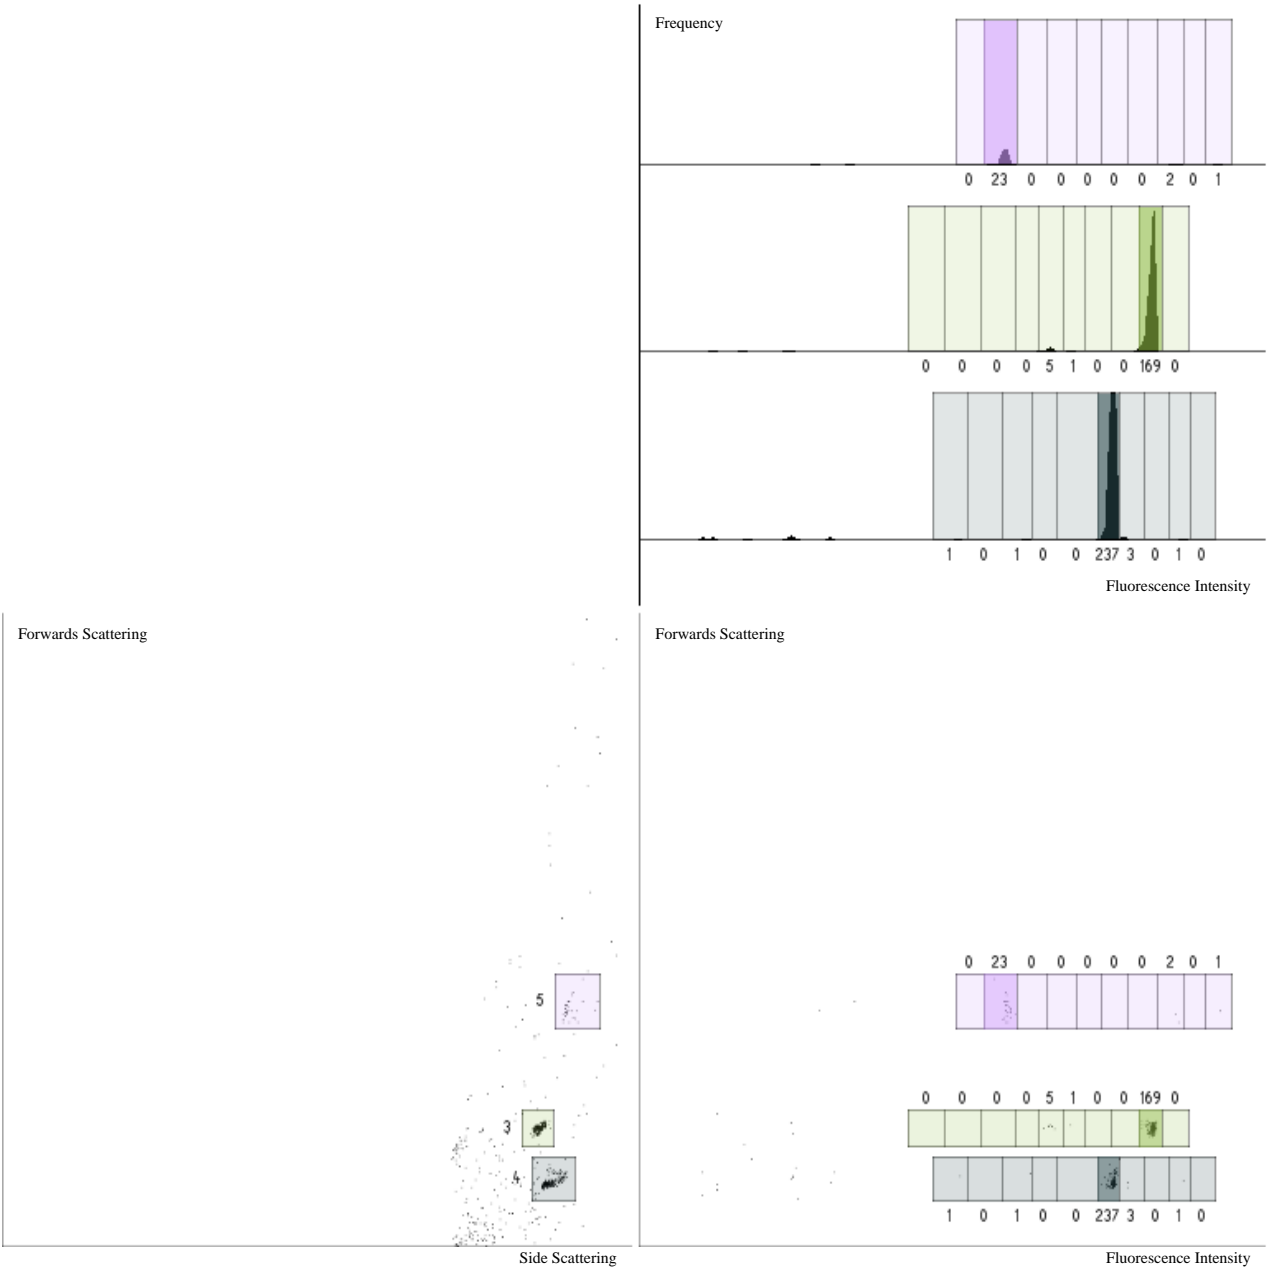

ANNEX 3: TAG DECONVOLUTION - BEAD 482

Passes flow sorting criteria: Yes  
Passes tag deconvolution criteria: Yes  
Included in protocol analysis: Yes  
Protocol: 10, 4, 2, 9  
Filename: Bin9\_plateA0\_E8.fcs  
Split 1: Petrol shading  
Split 2: Green shading  
Split 3: Violet shading

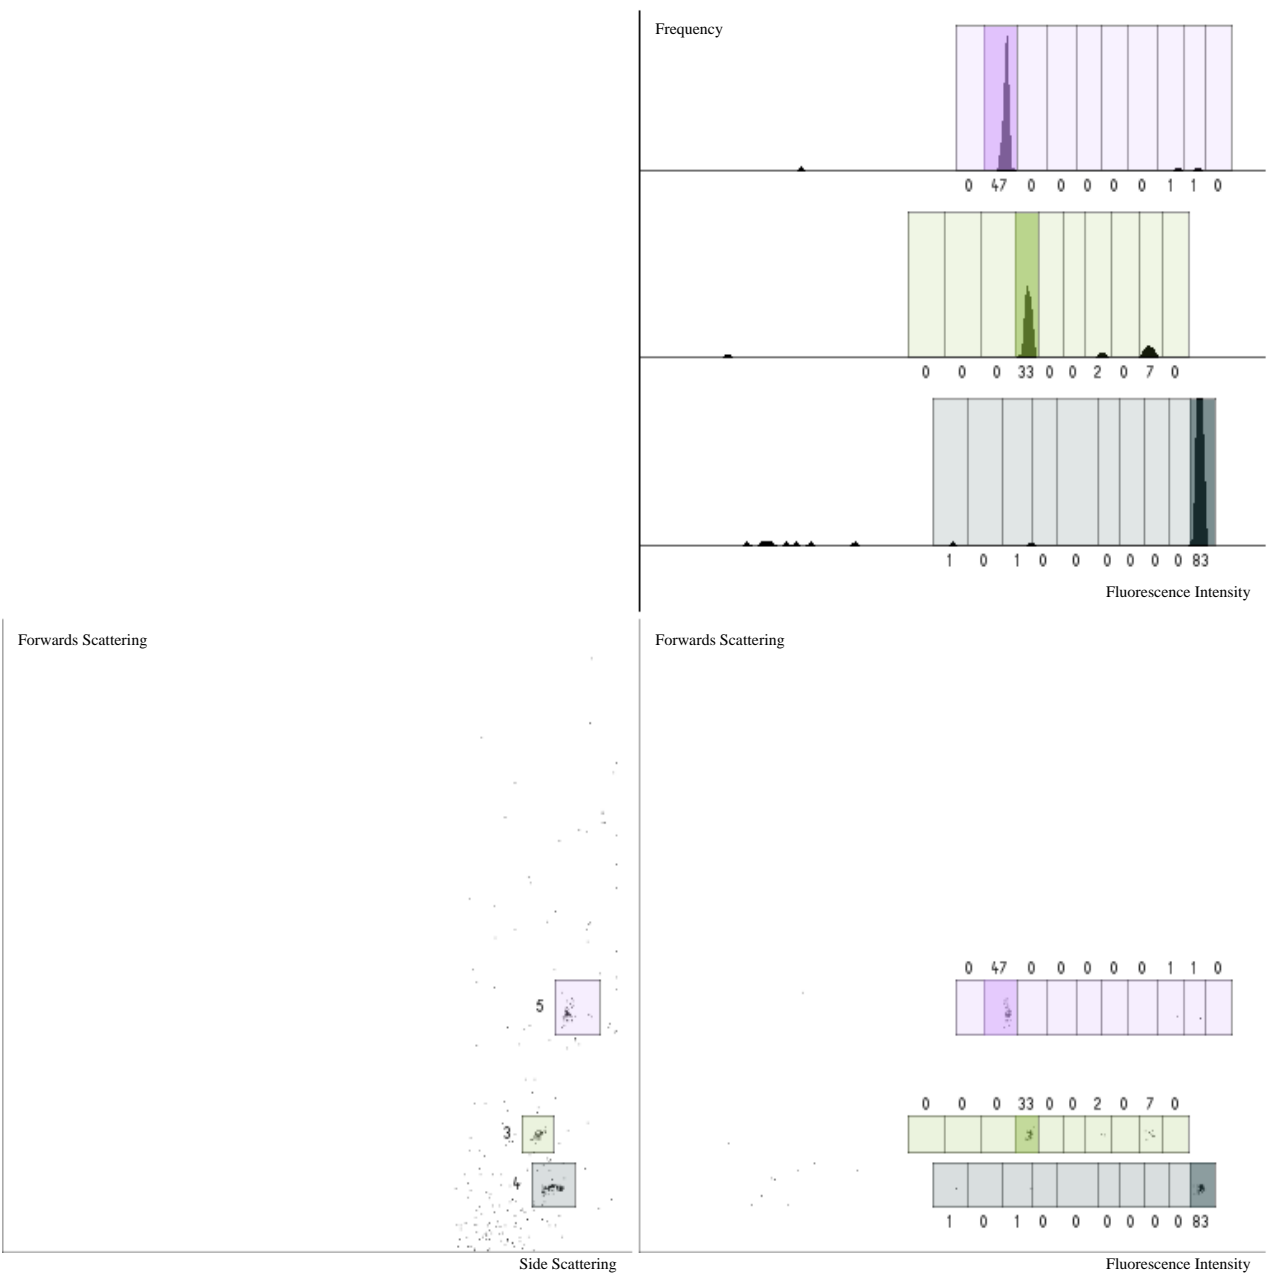

ANNEX 3: TAG DECONVOLUTION - BEAD 483

Passes flow sorting criteria: Yes  
Passes tag deconvolution criteria: No  
Included in protocol analysis: No  
Protocol: N/A  
Filename: Bin9\_plateA0\_E9.fcs  
Split 1: Petrol shading  
Split 2: Green shading  
Split 3: Violet shading

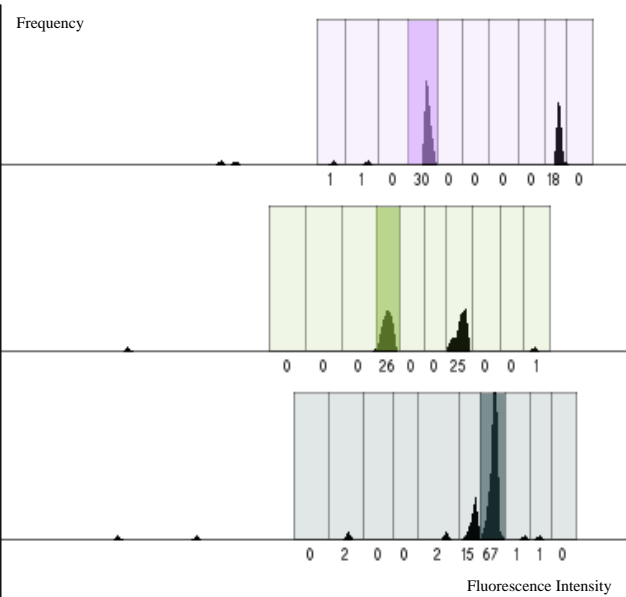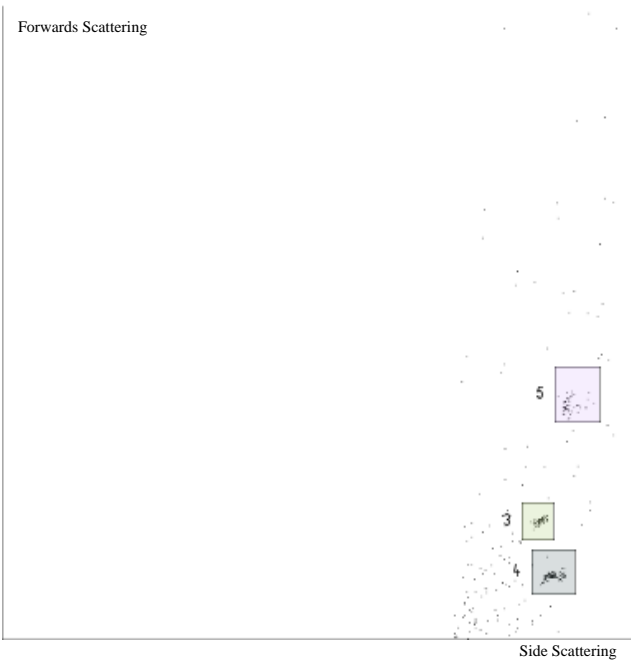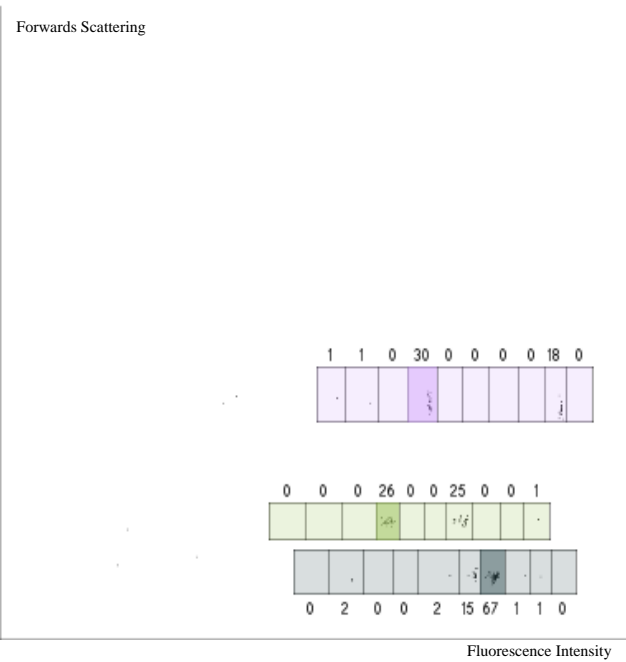

ANNEX 3: TAG DECONVOLUTION - BEAD 484

Passes flow sorting criteria: Yes  
Passes tag deconvolution criteria: Yes  
Included in protocol analysis: Yes  
Protocol: 10, 7, 1, 9  
Filename: Bin9\_plateA0\_E10.fcs  
Split 1: Petrol shading  
Split 2: Green shading  
Split 3: Violet shading

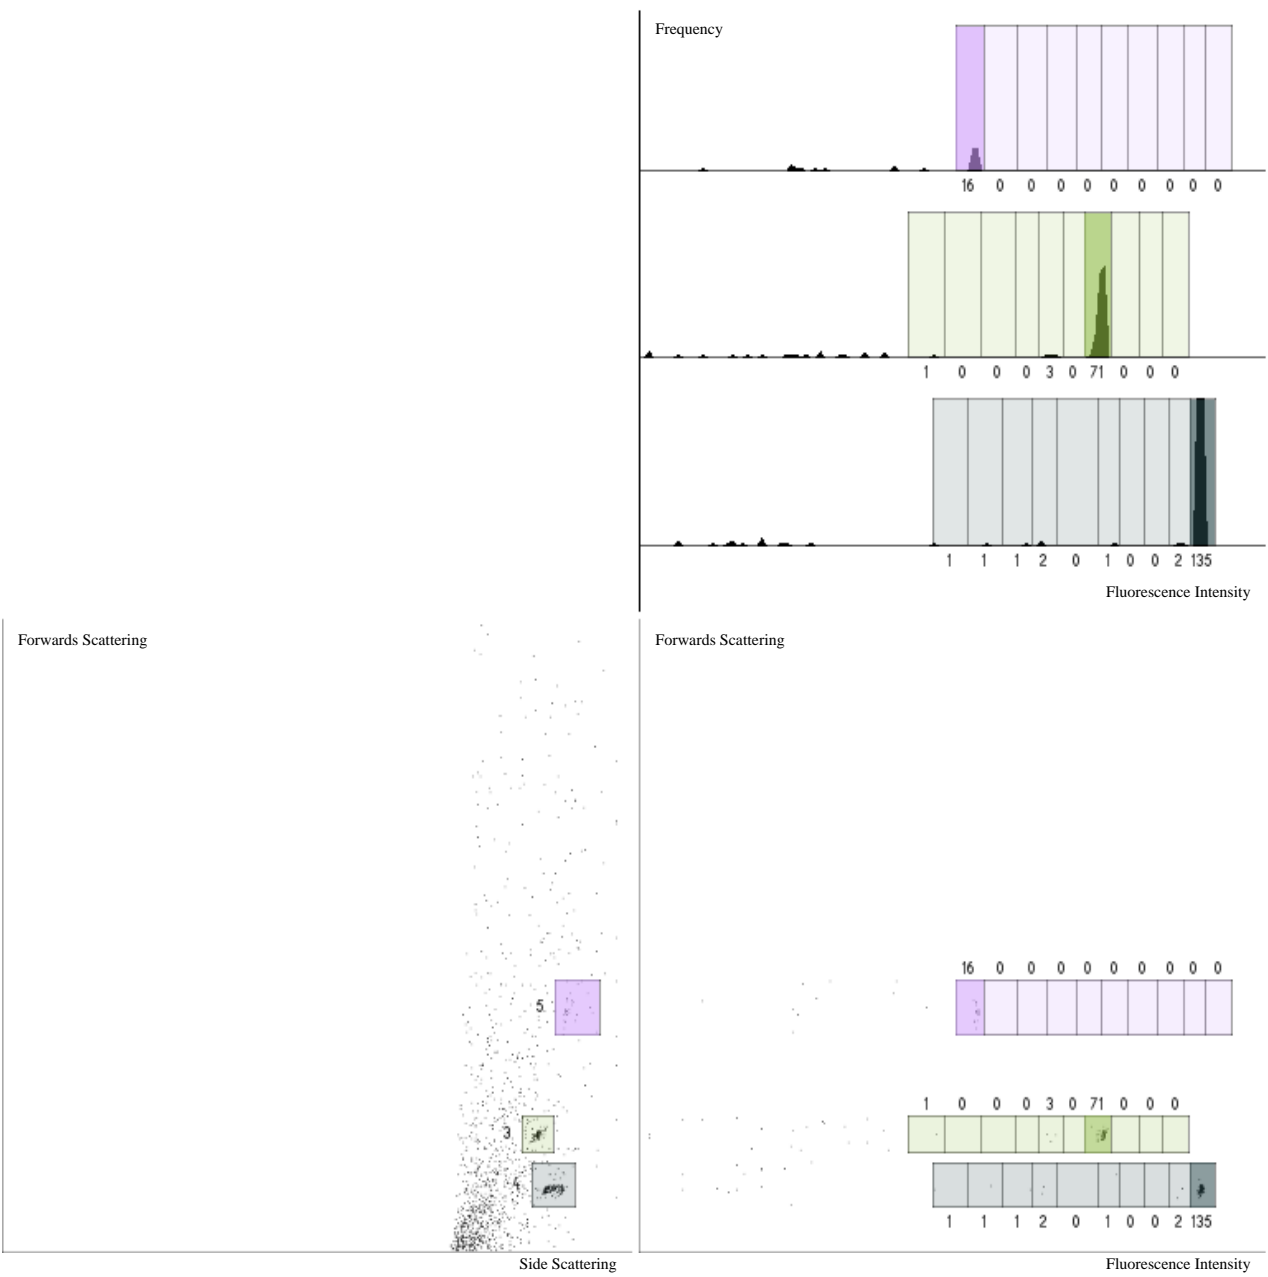

ANNEX 3: TAG DECONVOLUTION - BEAD 485

Passes flow sorting criteria: Yes  
Passes tag deconvolution criteria: Yes  
Included in protocol analysis: Yes  
Protocol: 3, 8, 1, 9  
Filename: Bin9\_plateA0\_E11.fcs  
Split 1: Petrol shading  
Split 2: Green shading  
Split 3: Violet shading

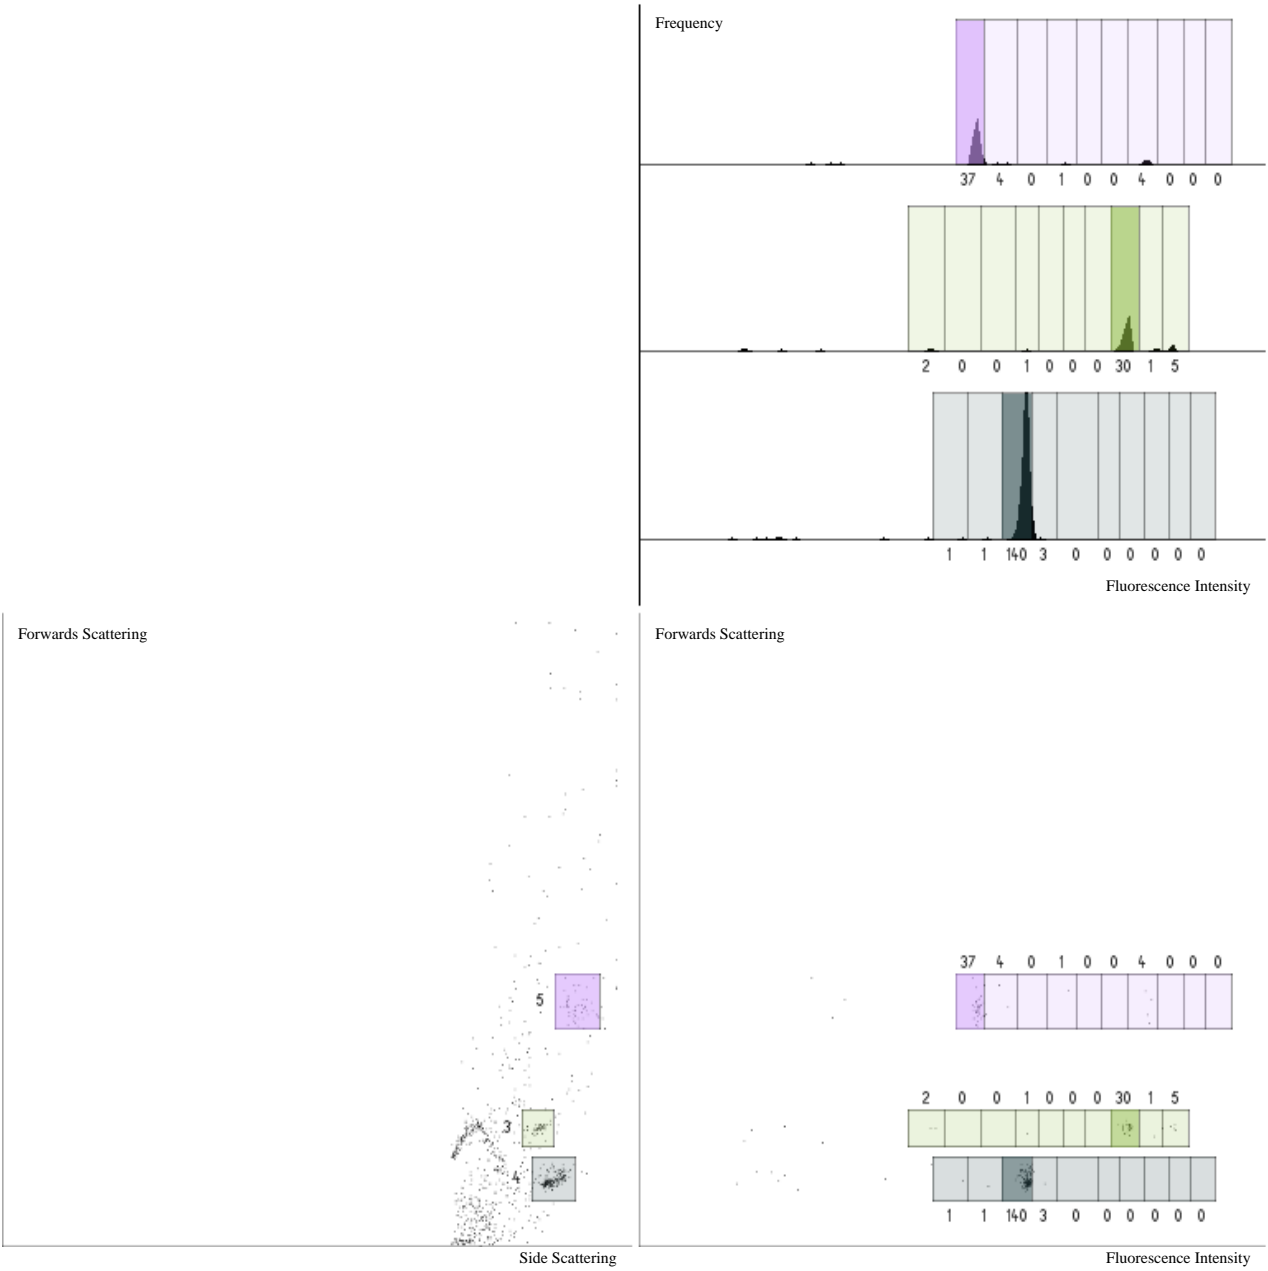

ANNEX 3: TAG DECONVOLUTION - BEAD 486

Passes flow sorting criteria: Yes  
Passes tag deconvolution criteria: No  
Included in protocol analysis: No  
Protocol: N/A  
Filename: Bin9\_plateA0\_E12.fcs  
Split 1: Petrol shading  
Split 2: Green shading  
Split 3: Violet shading

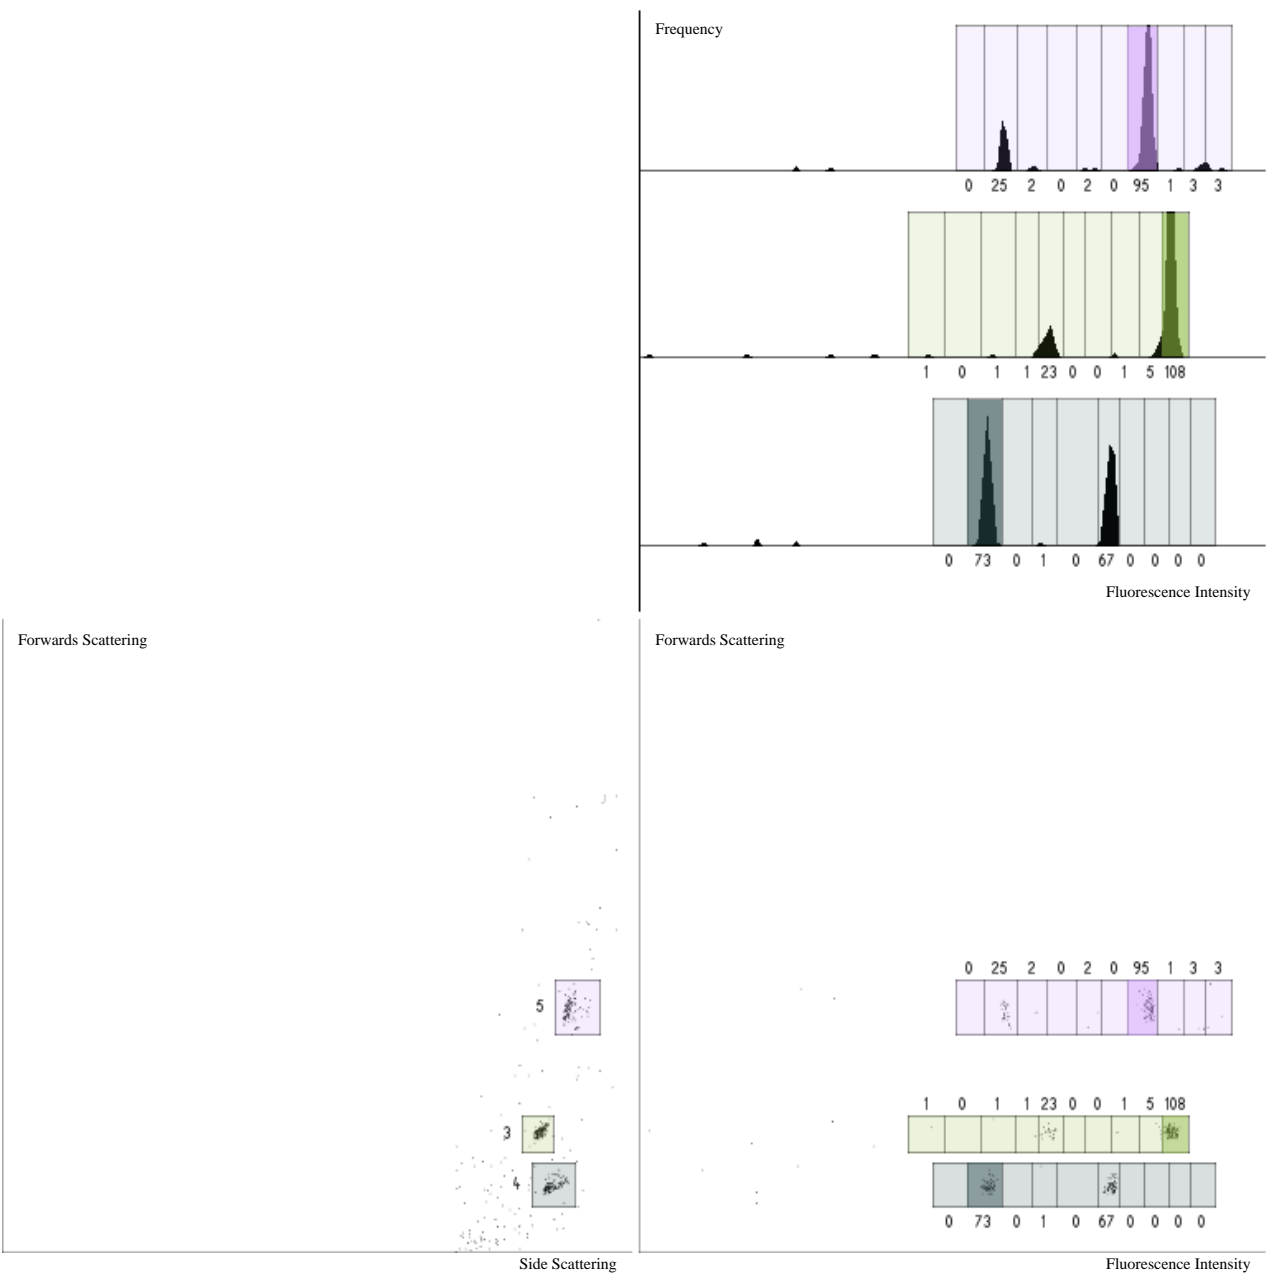



ANNEX 3: TAG DECONVOLUTION - BEAD 487

Passes flow sorting criteria: Yes  
Passes tag deconvolution criteria: Yes  
Included in protocol analysis: Yes  
Protocol: 2, 9, 7, 9  
Filename: Bin9\_plateA0\_F1.fcs  
Split 1: Petrol shading  
Split 2: Green shading  
Split 3: Violet shading

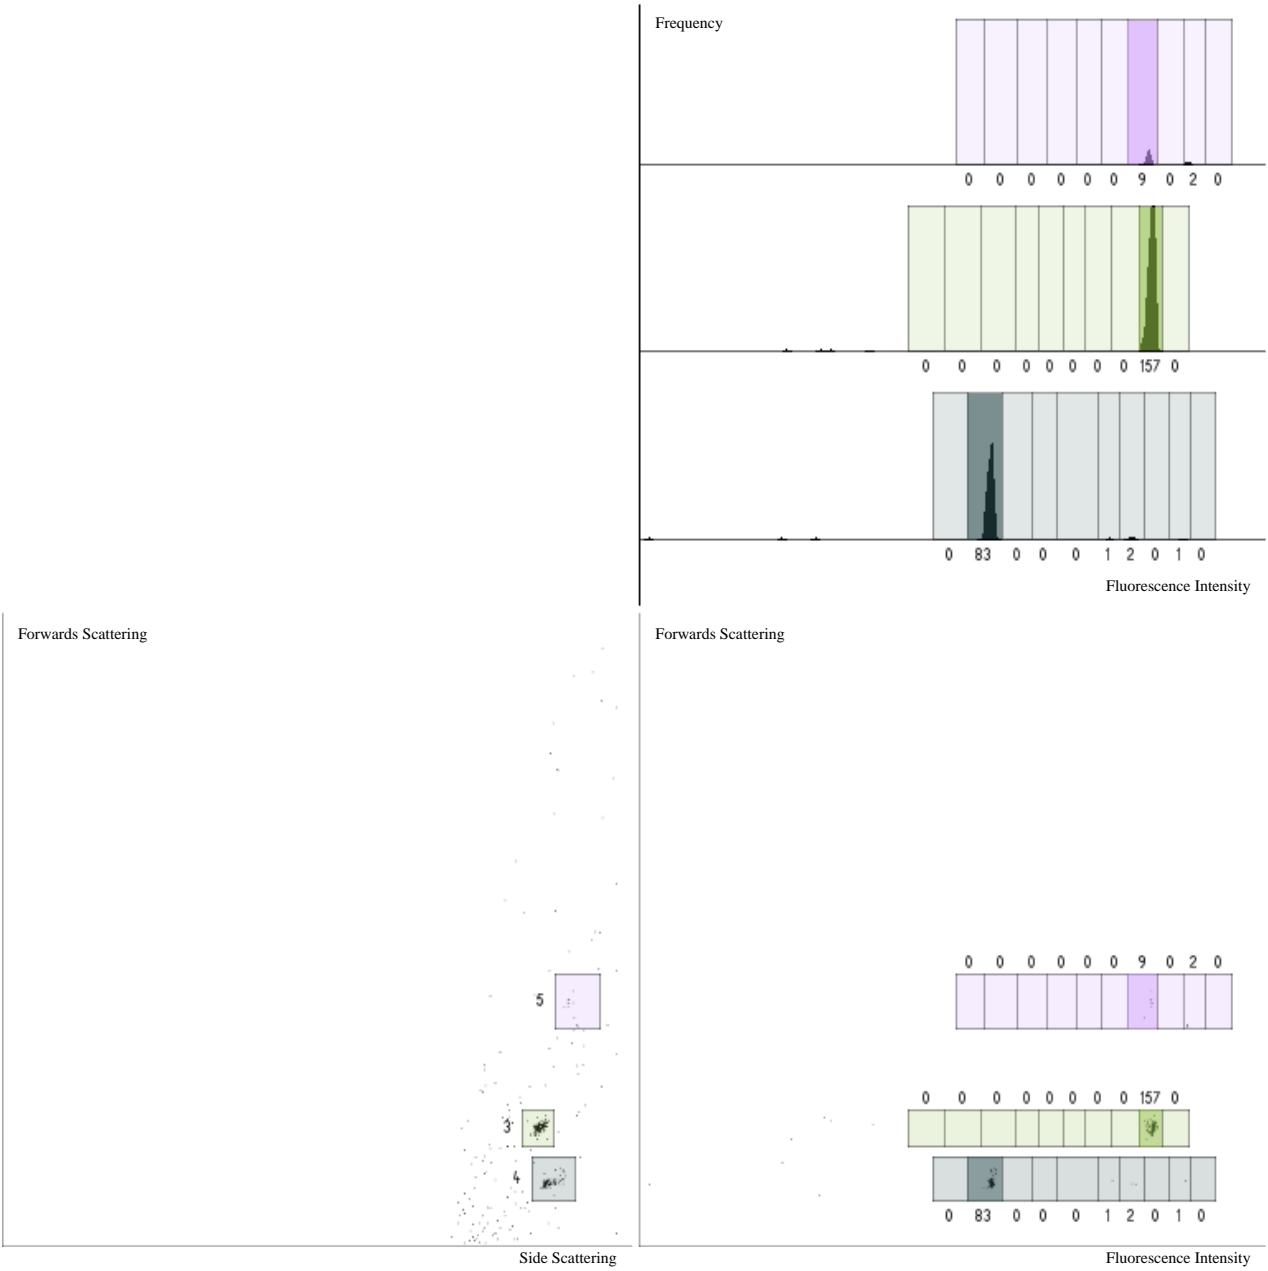

ANNEX 3: TAG DECONVOLUTION - BEAD 488

Passes flow sorting criteria: Yes  
Passes tag deconvolution criteria: Yes  
Included in protocol analysis: Yes  
Protocol: 5, 9, 2, 9  
Filename: Bin9\_plateA0\_F2.fcs  
Split 1: Petrol shading  
Split 2: Green shading  
Split 3: Violet shading

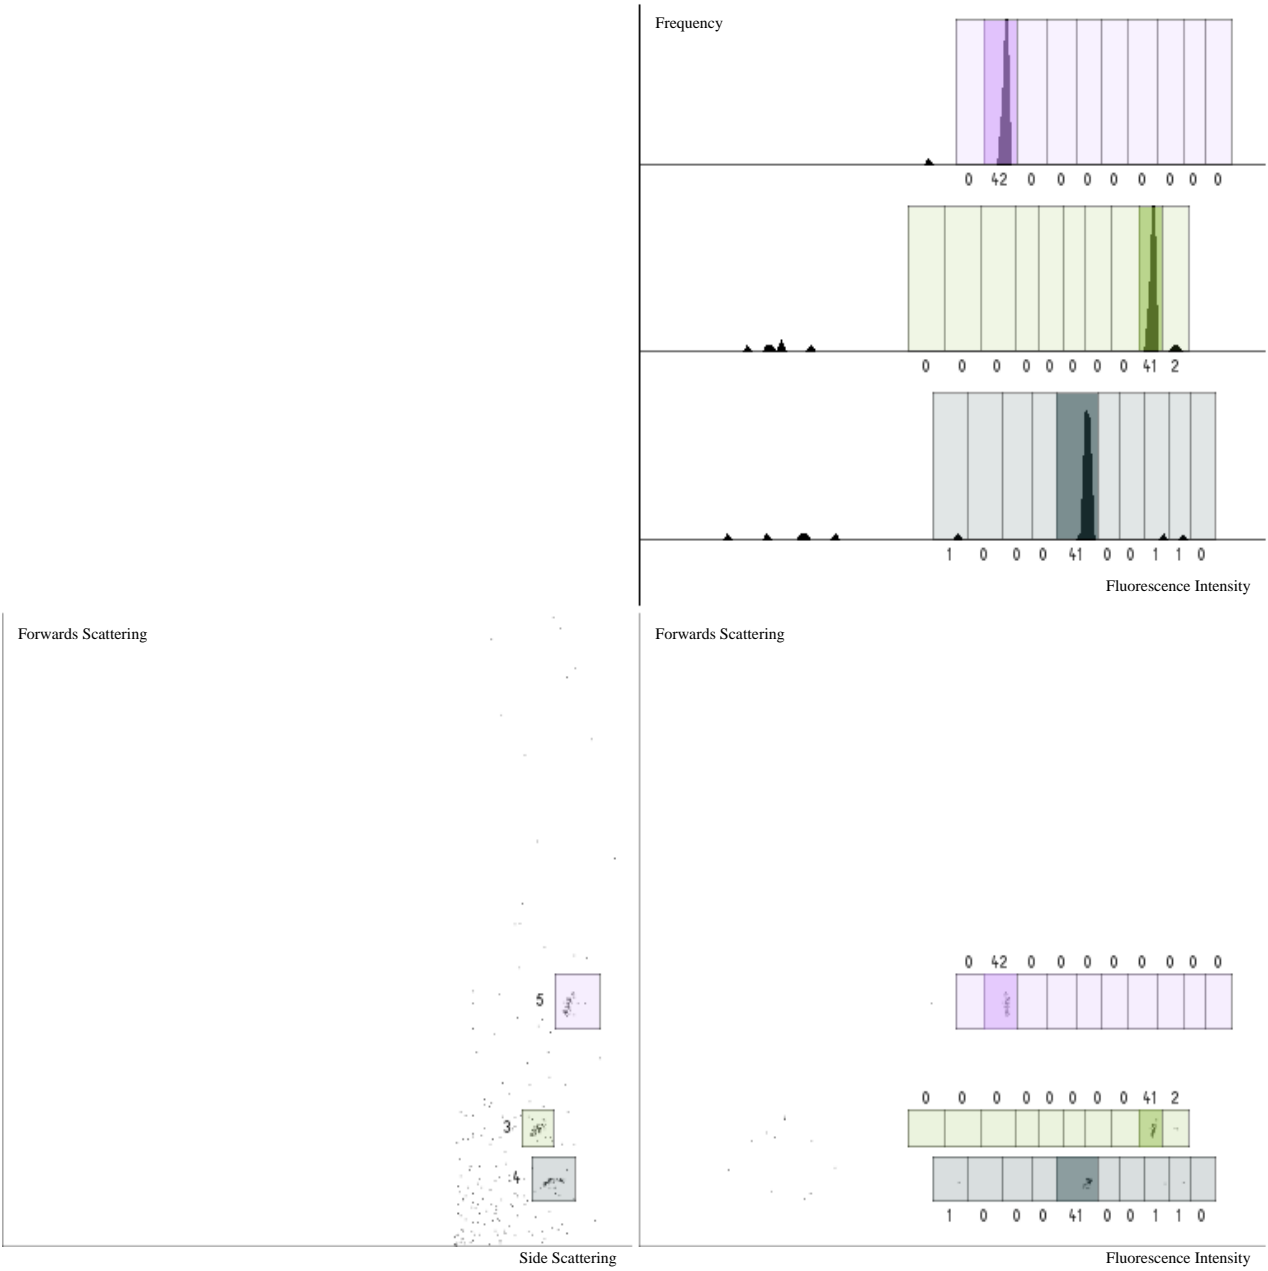

ANNEX 3: TAG DECONVOLUTION - BEAD 489

Passes flow sorting criteria: Yes  
Passes tag deconvolution criteria: Yes  
Included in protocol analysis: Yes  
Protocol: 5, 9, 7, 9  
Filename: Bin9\_plateA0\_F3.fcs  
Split 1: Petrol shading  
Split 2: Green shading  
Split 3: Violet shading

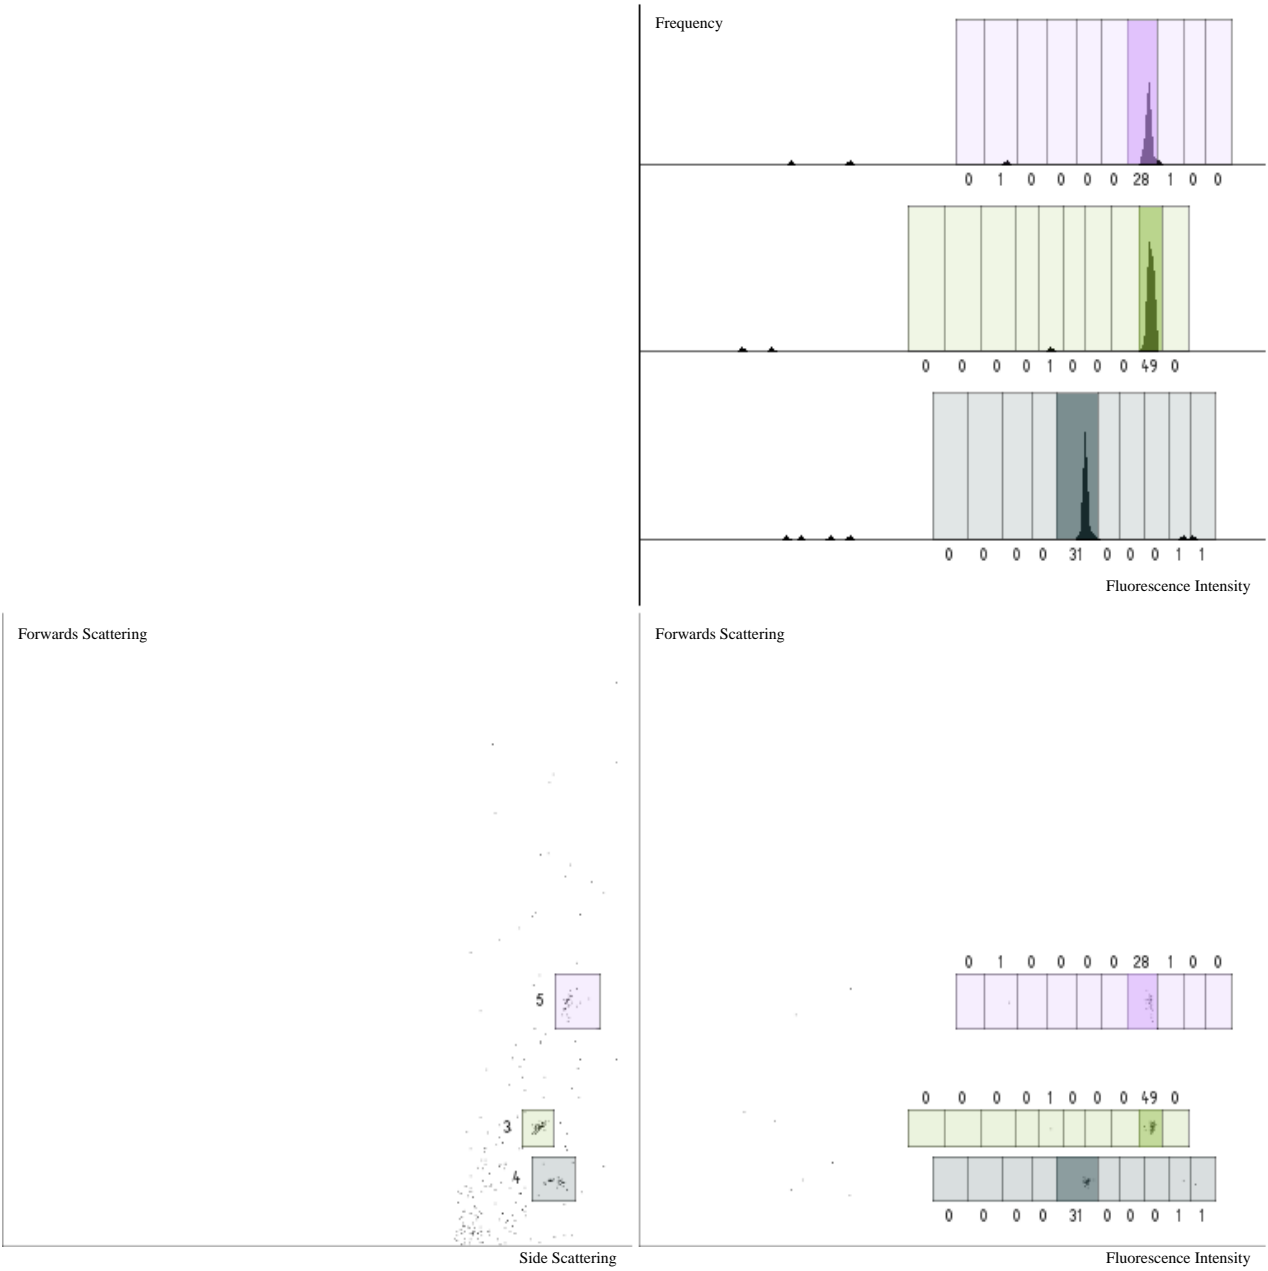

ANNEX 3: TAG DECONVOLUTION - BEAD 490

Passes flow sorting criteria: Yes  
Passes tag deconvolution criteria: Yes  
Included in protocol analysis: Yes  
Protocol: 7, 6, 1, 9  
Filename: Bin9\_plateA0\_F4.fcs  
Split 1: Petrol shading  
Split 2: Green shading  
Split 3: Violet shading

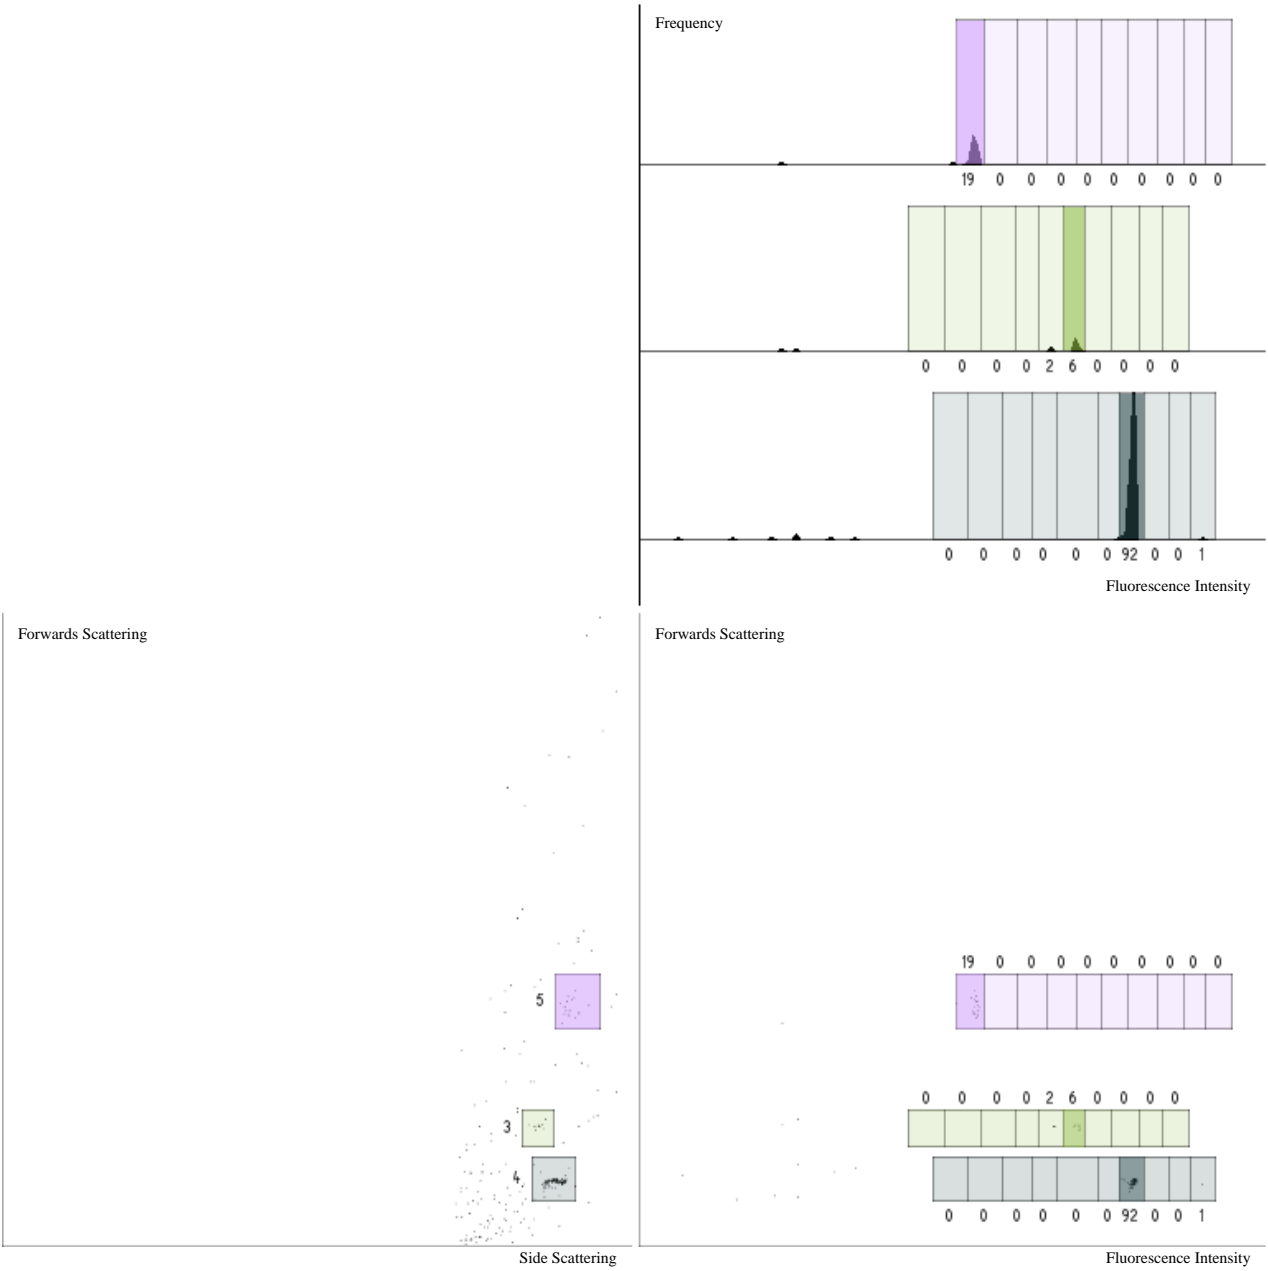

ANNEX 3: TAG DECONVOLUTION - BEAD 491

Passes flow sorting criteria: Yes  
Passes tag deconvolution criteria: Yes  
Included in protocol analysis: Yes  
Protocol: 9, 5, 6, 9  
Filename: Bin9\_plateA0\_F6.fcs  
Split 1: Petrol shading  
Split 2: Green shading  
Split 3: Violet shading

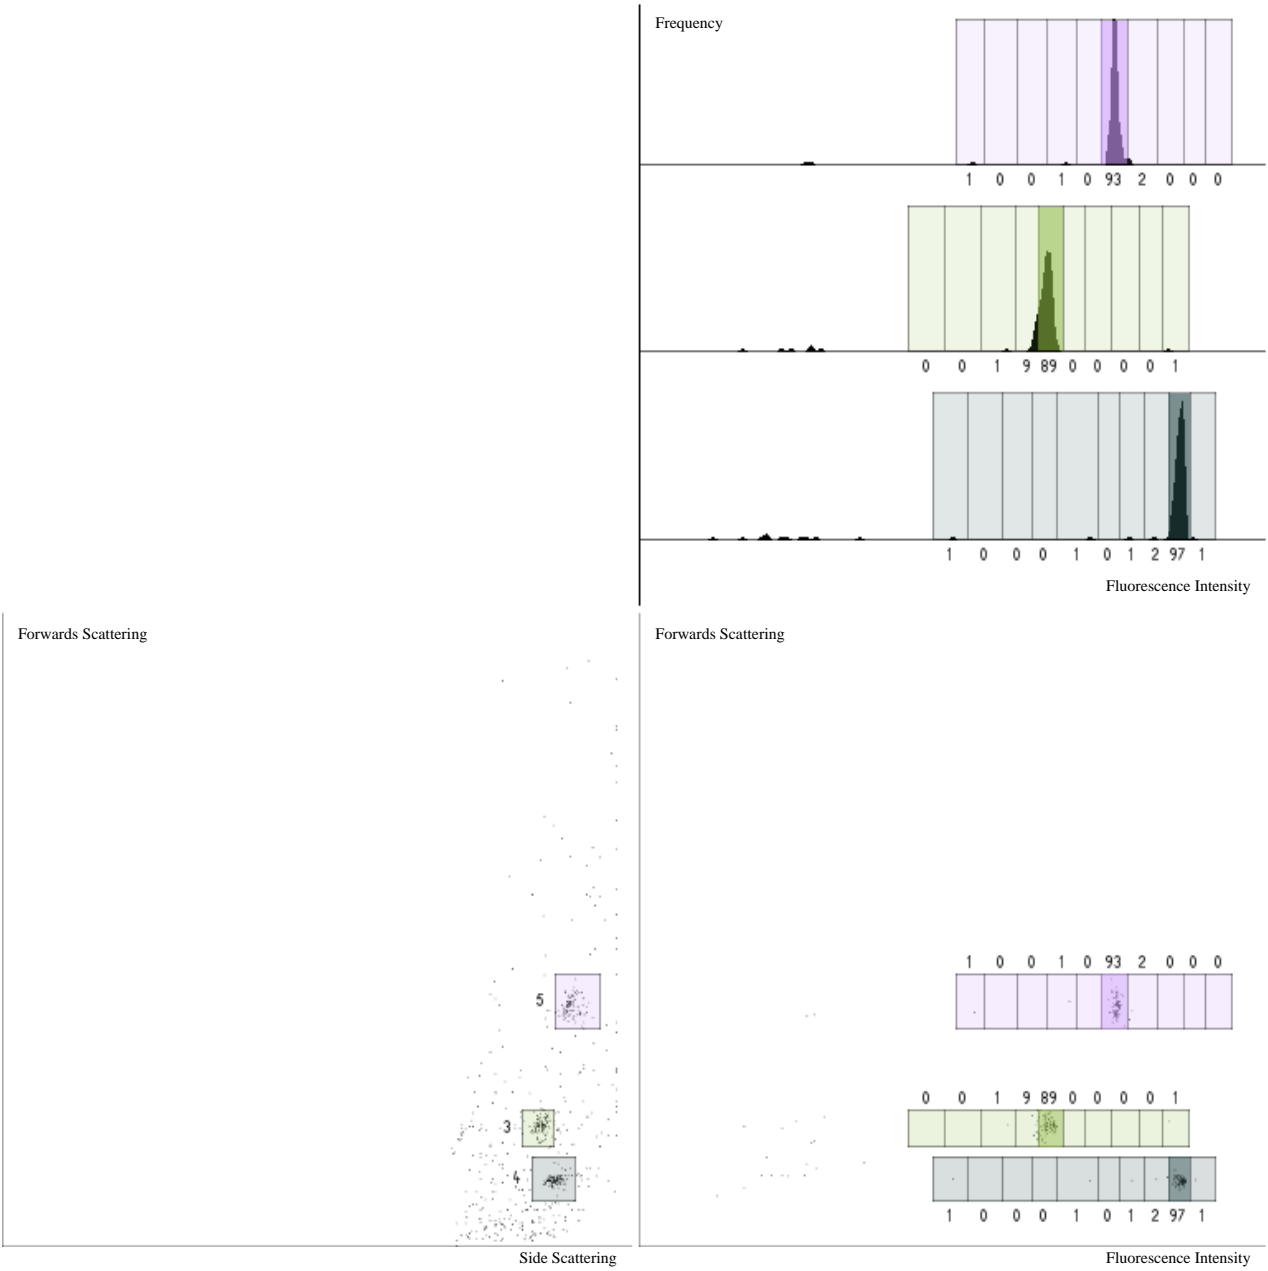

ANNEX 3: TAG DECONVOLUTION - BEAD 492

Passes flow sorting criteria: Yes  
Passes tag deconvolution criteria: Yes  
Included in protocol analysis: Yes  
Protocol: 5, 2, 7, 9  
Filename: Bin9\_plateA0\_F7.fcs  
Split 1: Petrol shading  
Split 2: Green shading  
Split 3: Violet shading

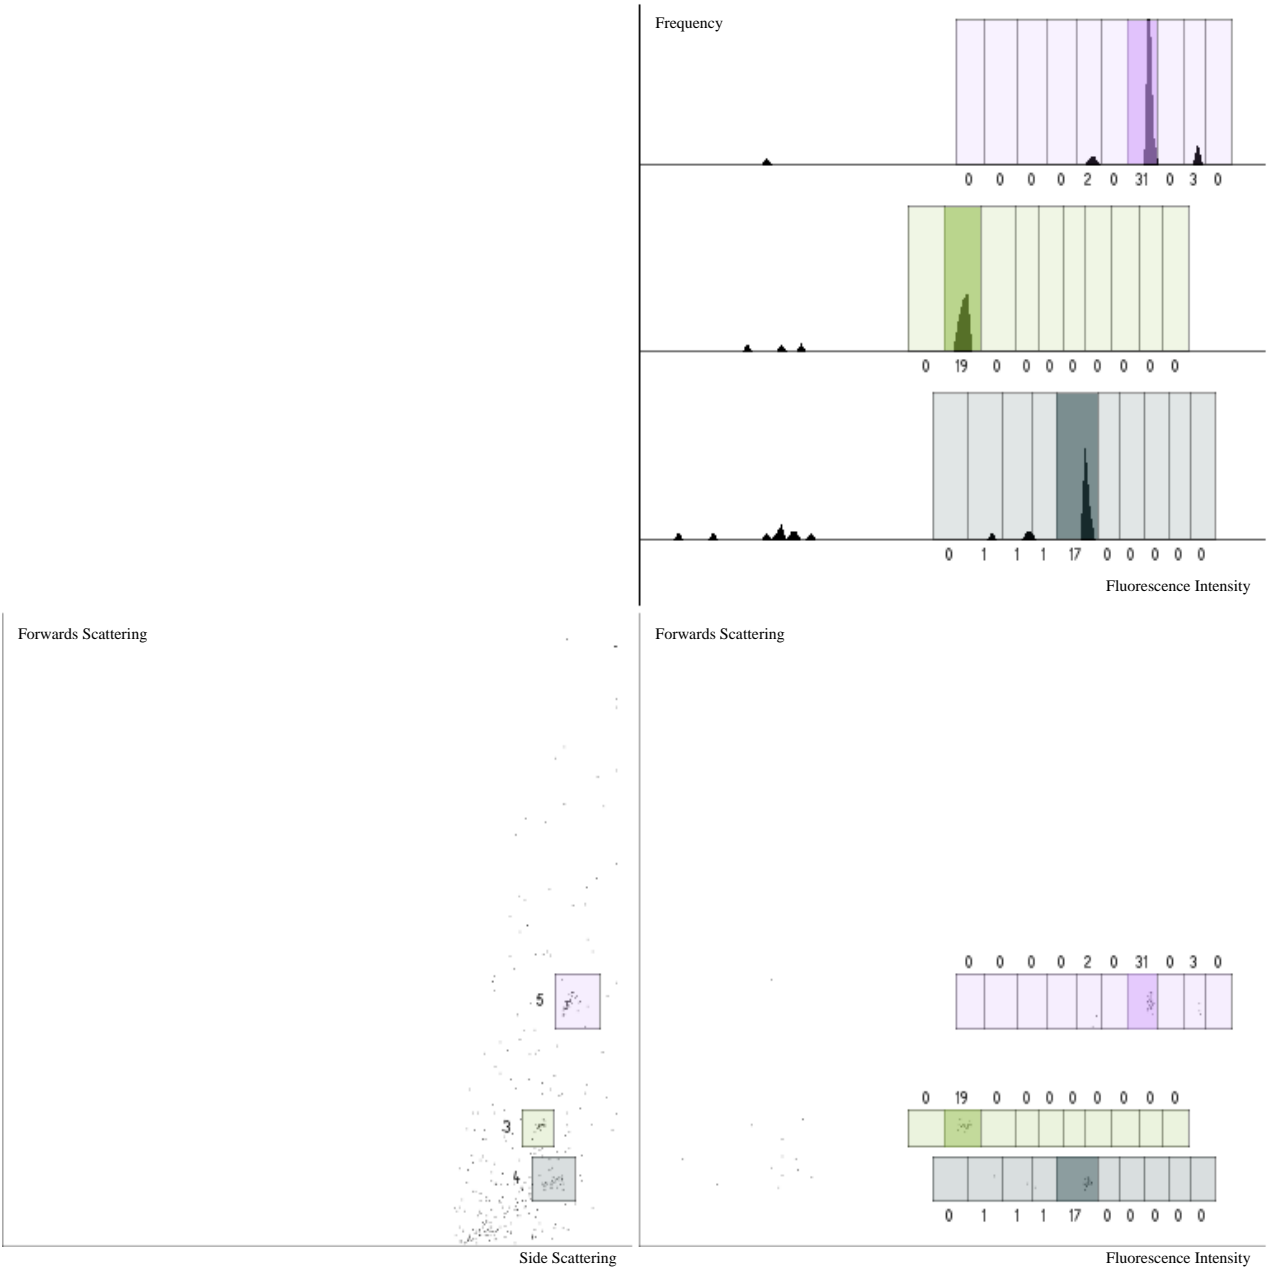

ANNEX 3: TAG DECONVOLUTION - BEAD 493

Passes flow sorting criteria: Yes  
Passes tag deconvolution criteria: Yes  
Included in protocol analysis: Yes  
Protocol: 4, 7, 5, 9  
Filename: Bin9\_plateA0\_F8.fcs  
Split 1: Petrol shading  
Split 2: Green shading  
Split 3: Violet shading

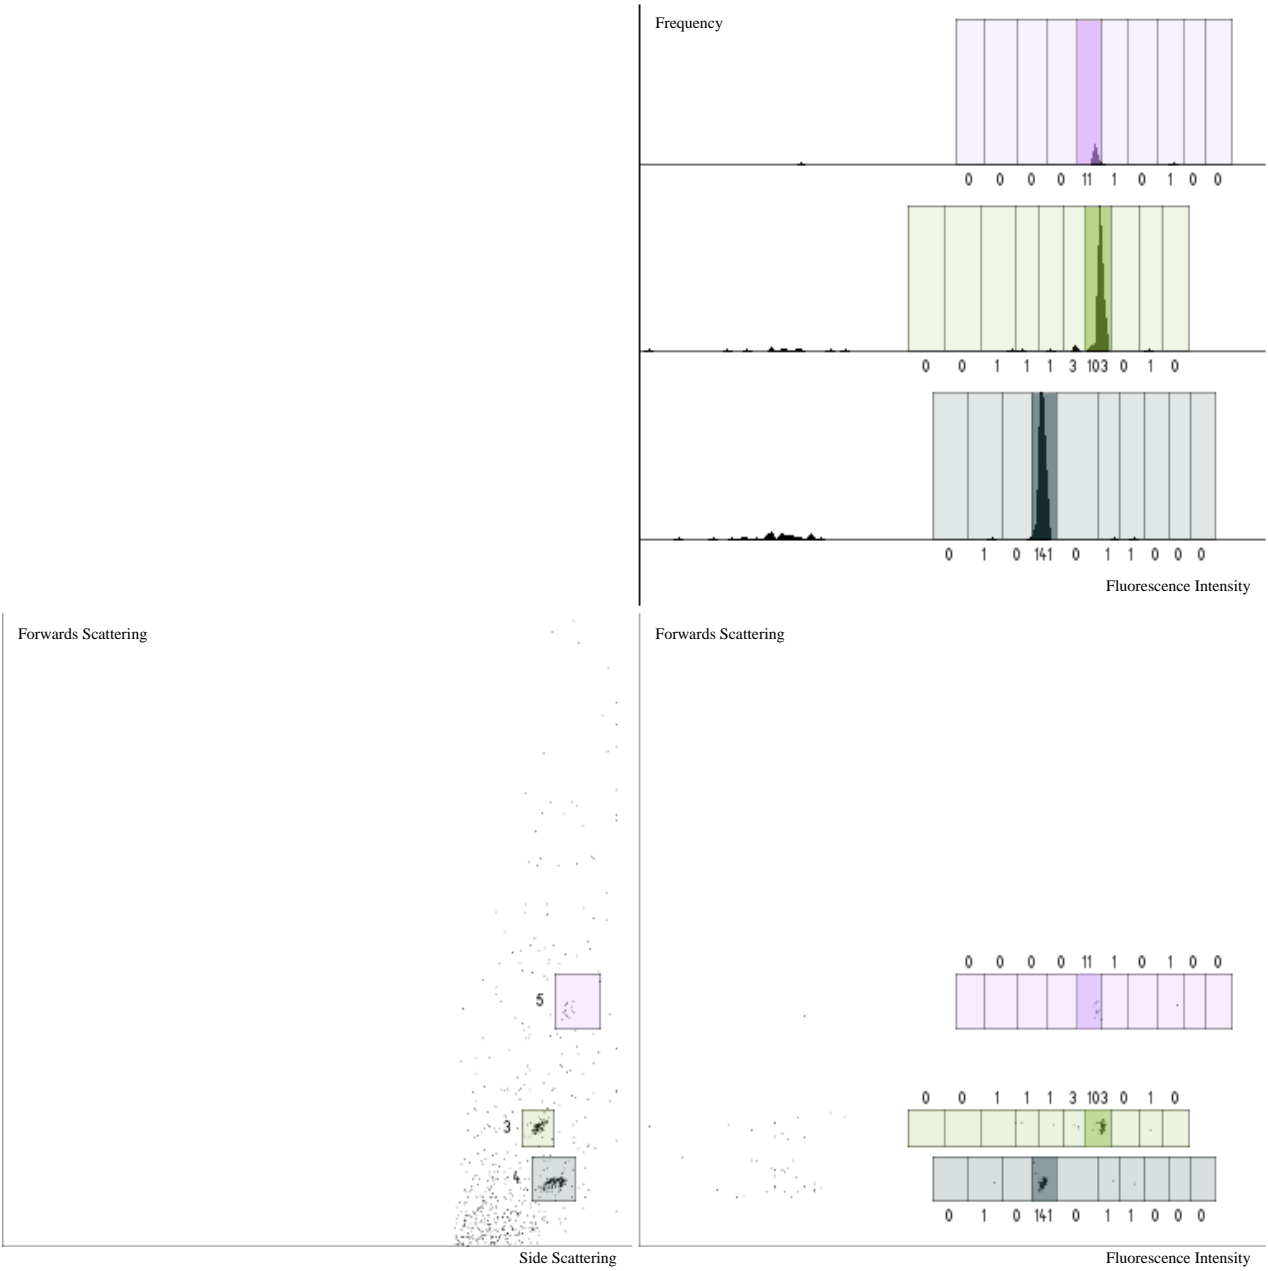

ANNEX 3: TAG DECONVOLUTION - BEAD 494

Passes flow sorting criteria: Yes  
Passes tag deconvolution criteria: Yes  
Included in protocol analysis: Yes  
Protocol: 3, 3, 10, 9  
Filename: Bin9\_plateA0\_F9.fcs  
Split 1: Petrol shading  
Split 2: Green shading  
Split 3: Violet shading

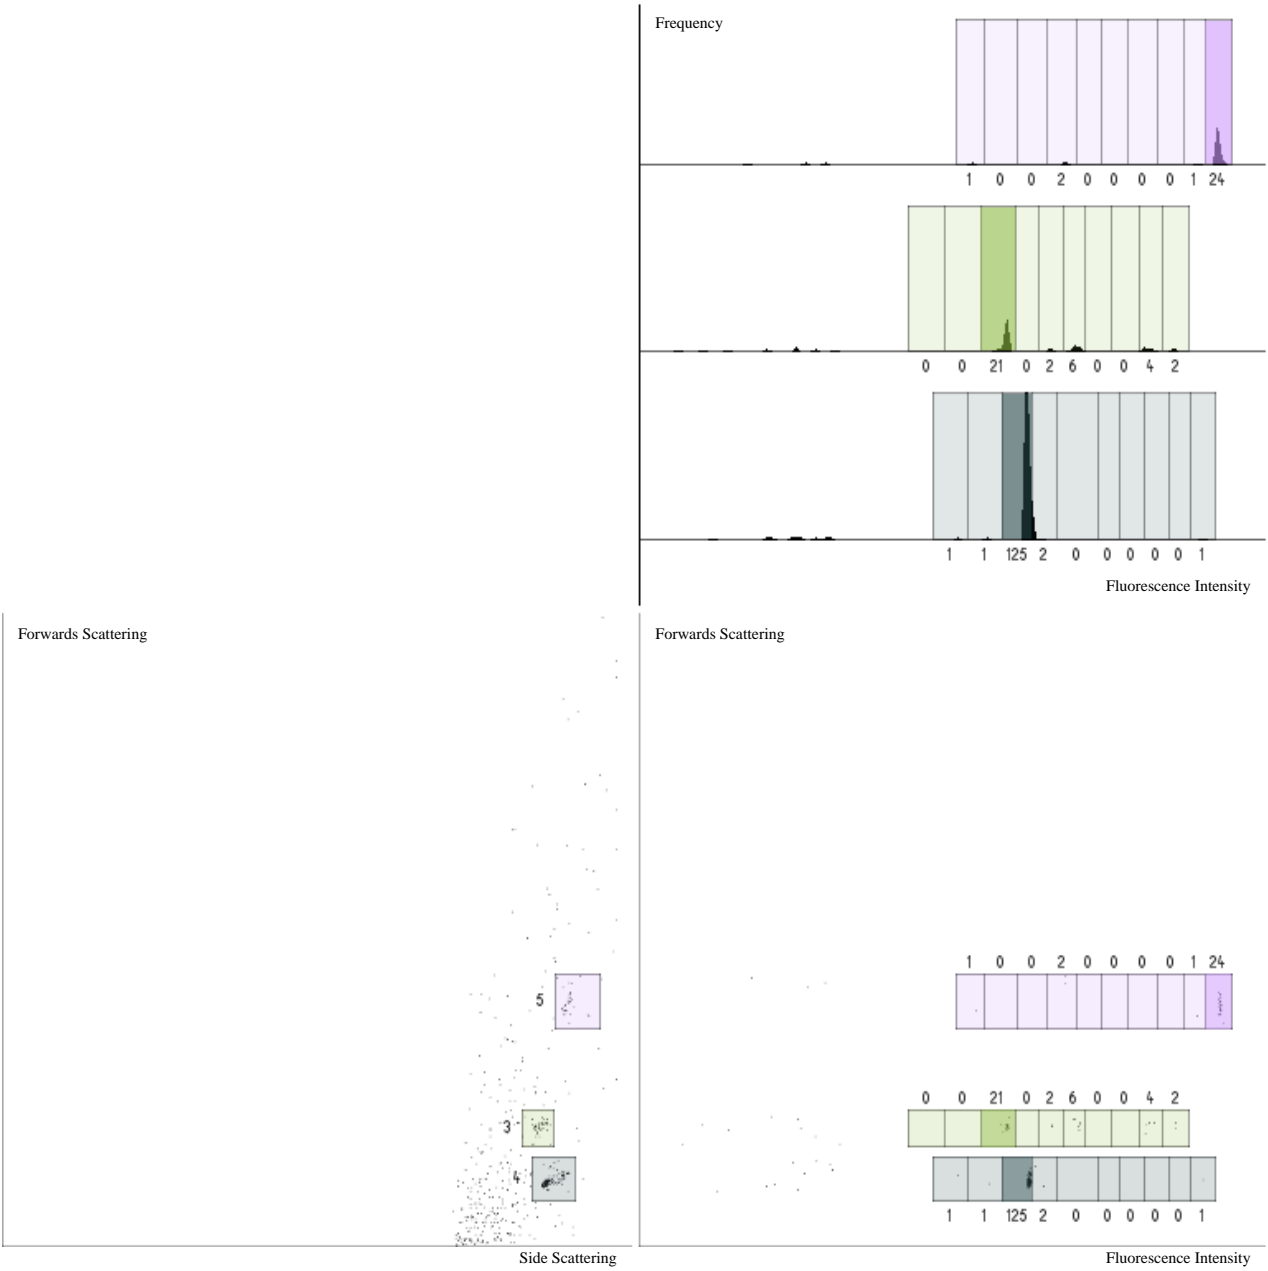



ANNEX 3: TAG DECONVOLUTION - BEAD 495

Passes flow sorting criteria: Yes  
Passes tag deconvolution criteria: Yes  
Included in protocol analysis: Yes  
Protocol: 8, 7, 4, 9  
Filename: Bin9\_plateA0\_F10.fcs  
Split 1: Petrol shading  
Split 2: Green shading  
Split 3: Violet shading

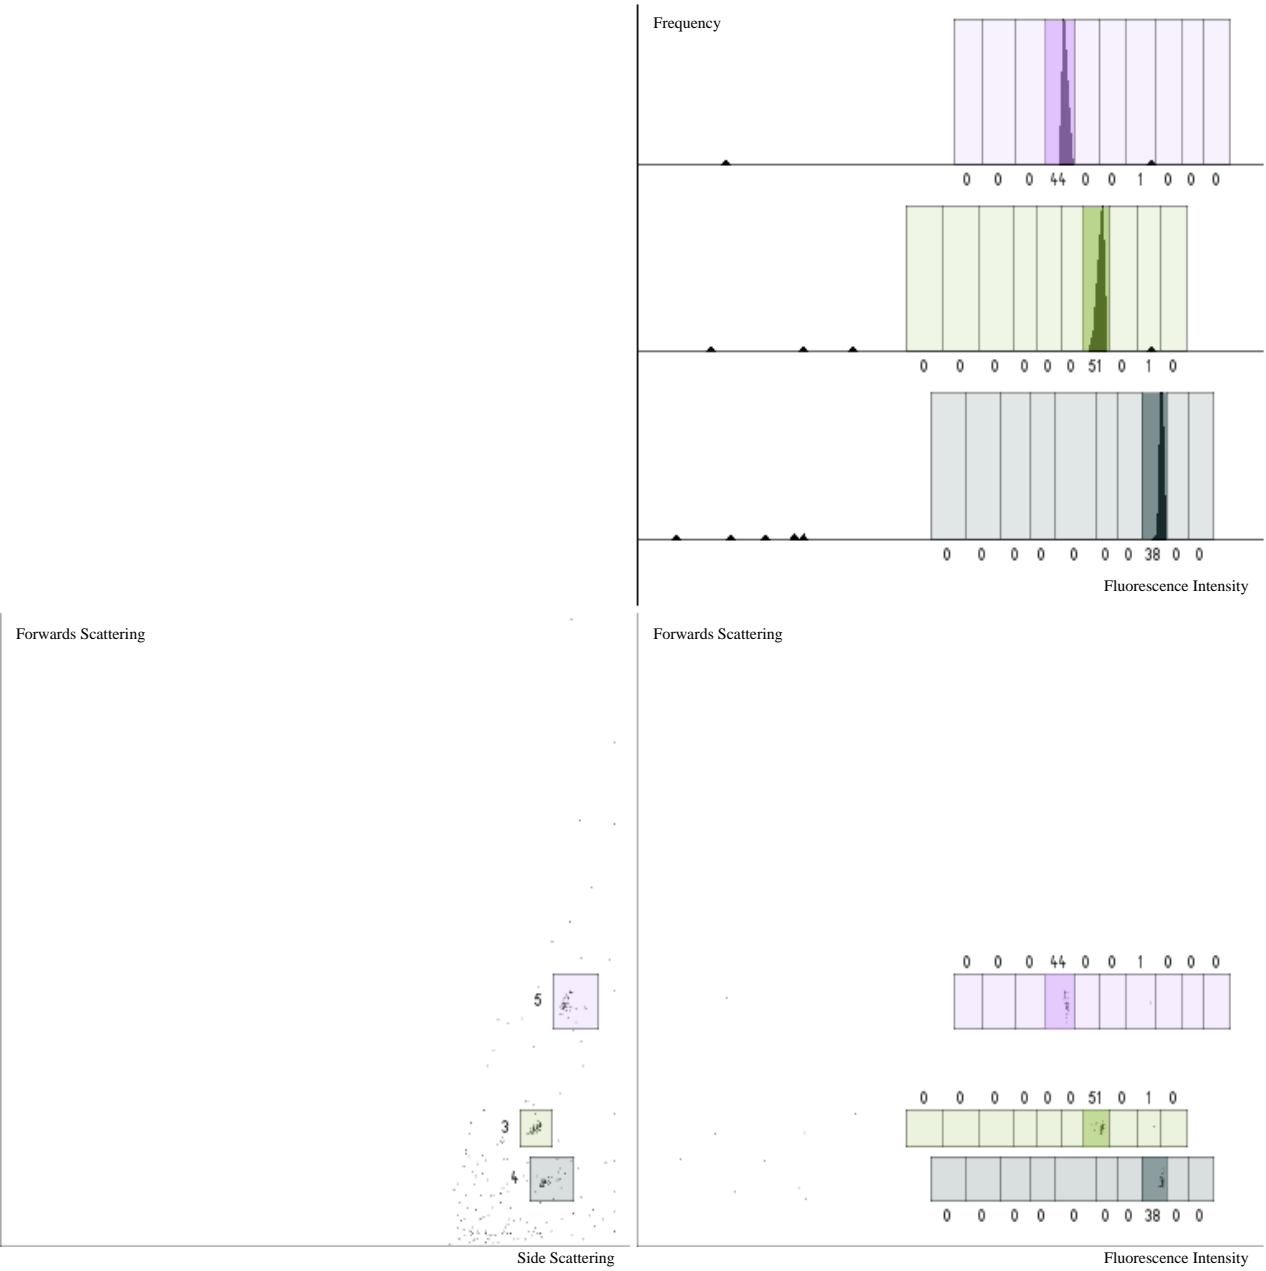

ANNEX 3: TAG DECONVOLUTION - BEAD 496

Passes flow sorting criteria: Yes  
Passes tag deconvolution criteria: Yes  
Included in protocol analysis: Yes  
Protocol: 8, 7, 7, 9  
Filename: Bin9\_plateA0\_F11.fcs  
Split 1: Petrol shading  
Split 2: Green shading  
Split 3: Violet shading

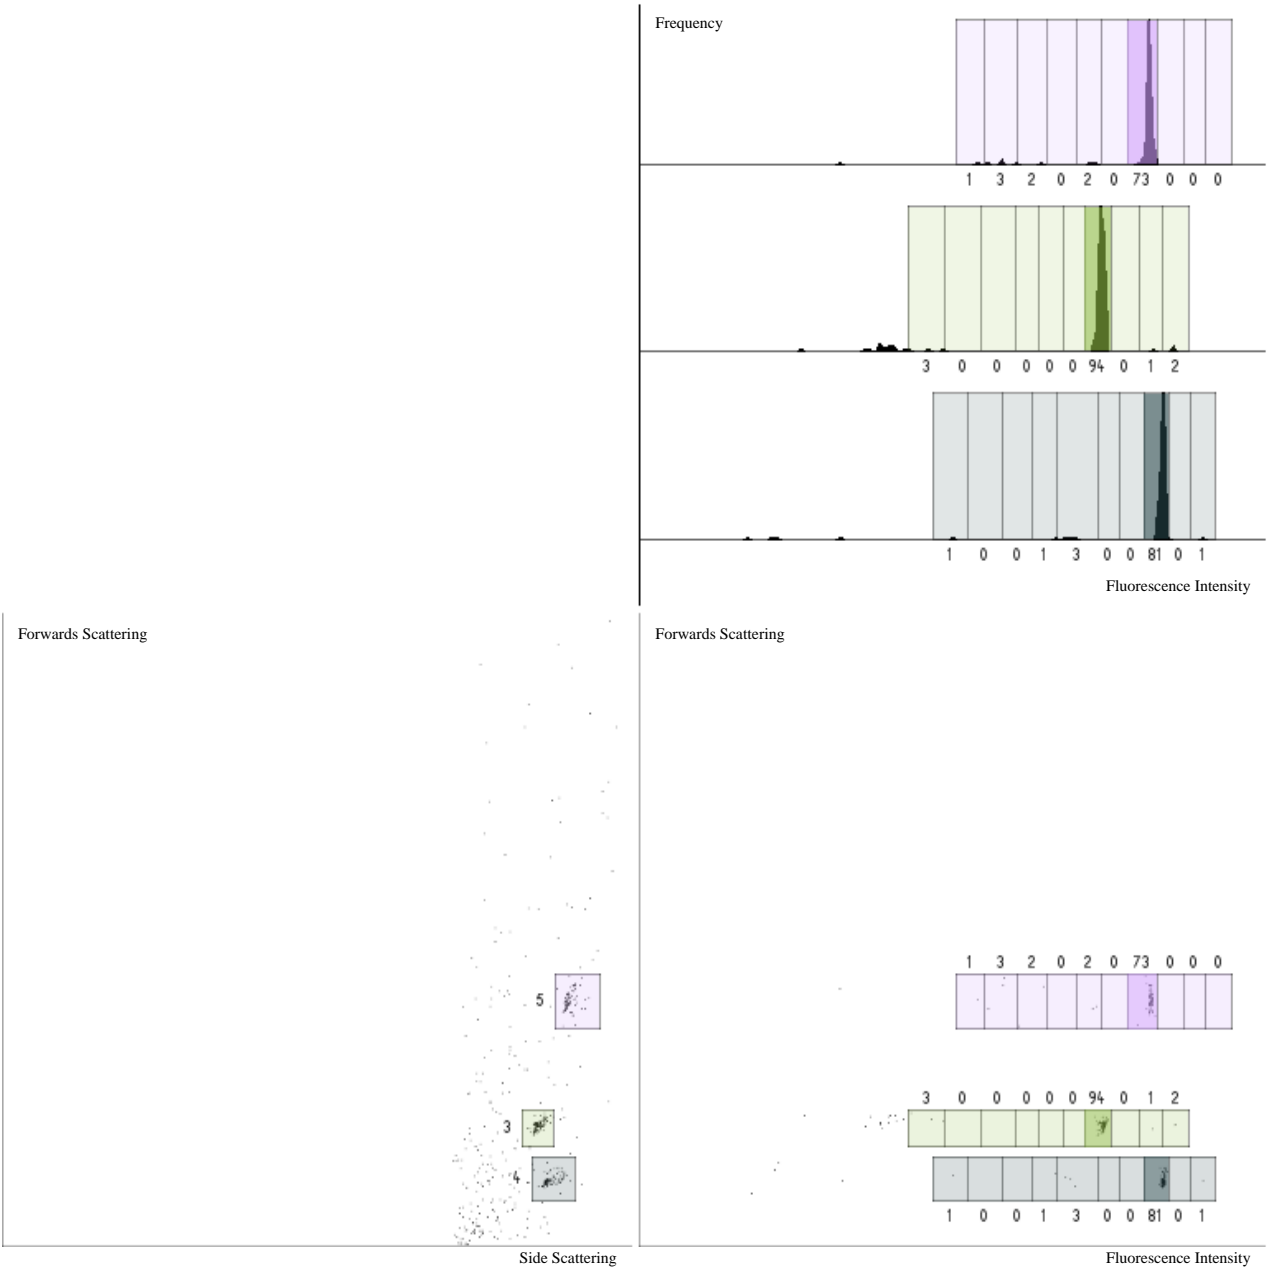

ANNEX 3: TAG DECONVOLUTION - BEAD 497

Passes flow sorting criteria: Yes  
Passes tag deconvolution criteria: Yes  
Included in protocol analysis: Yes  
Protocol: 3, 9, 2, 9  
Filename: Bin9\_plateA0\_F12.fcs  
Split 1: Petrol shading  
Split 2: Green shading  
Split 3: Violet shading

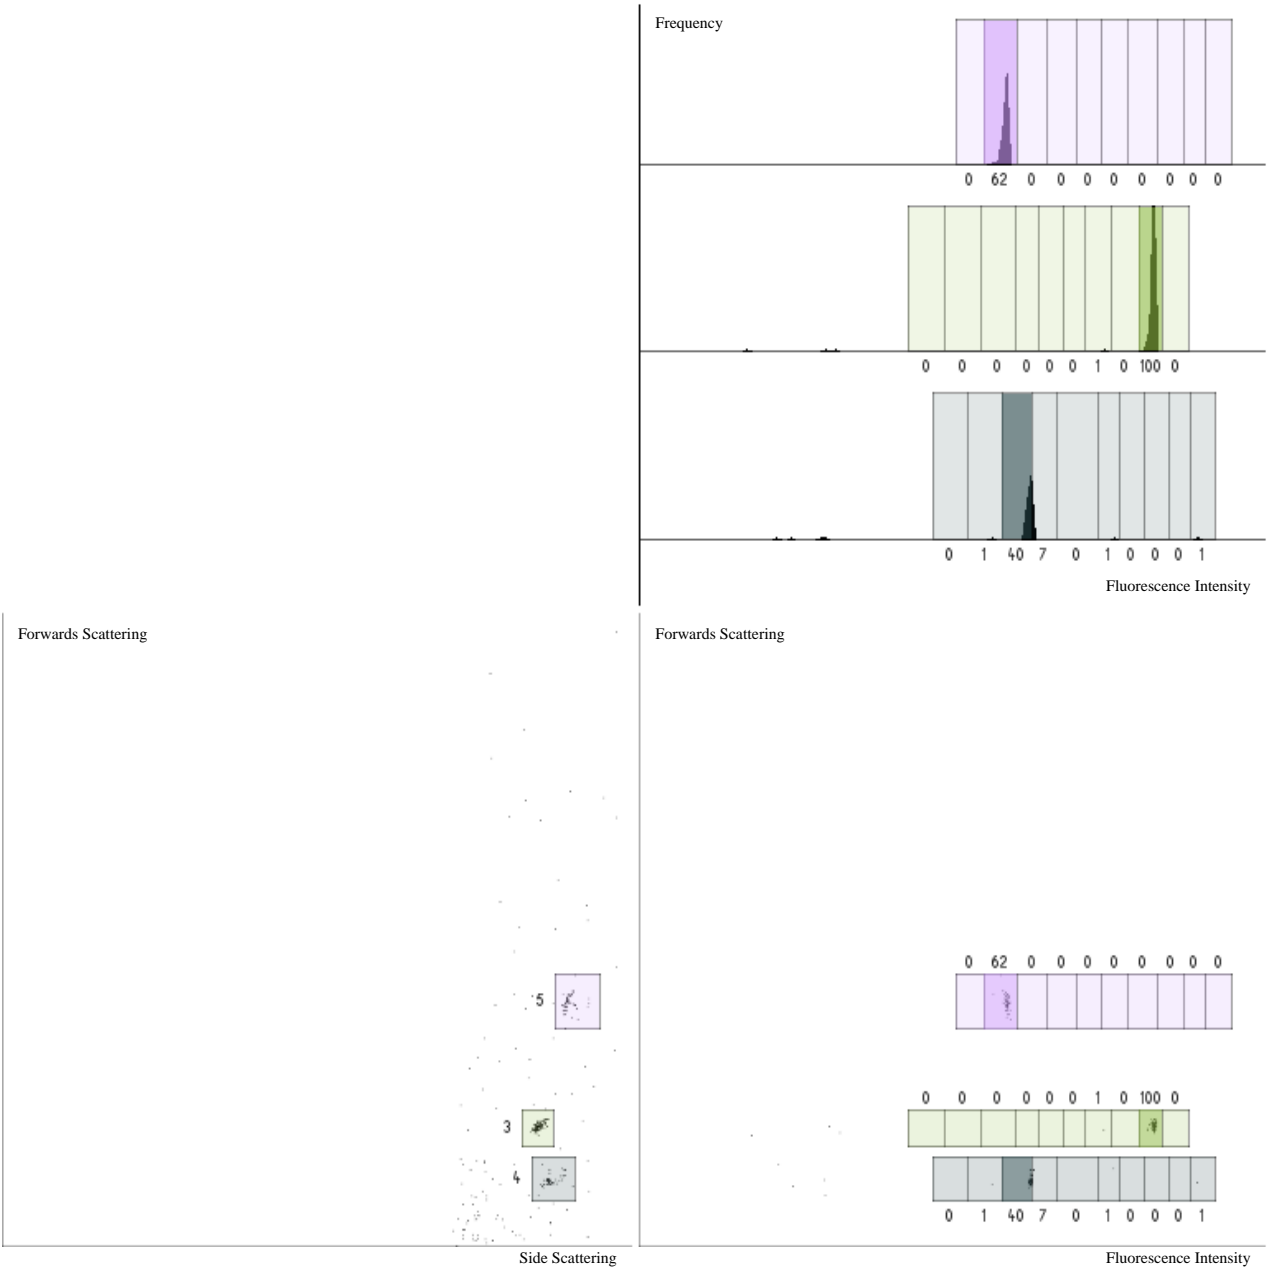

ANNEX 3: TAG DECONVOLUTION - BEAD 498

Passes flow sorting criteria: Yes  
Passes tag deconvolution criteria: Yes  
Included in protocol analysis: Yes  
Protocol: 3, 7, 5, 9  
Filename: Bin9\_plateA0\_G1.fcs  
Split 1: Petrol shading  
Split 2: Green shading  
Split 3: Violet shading

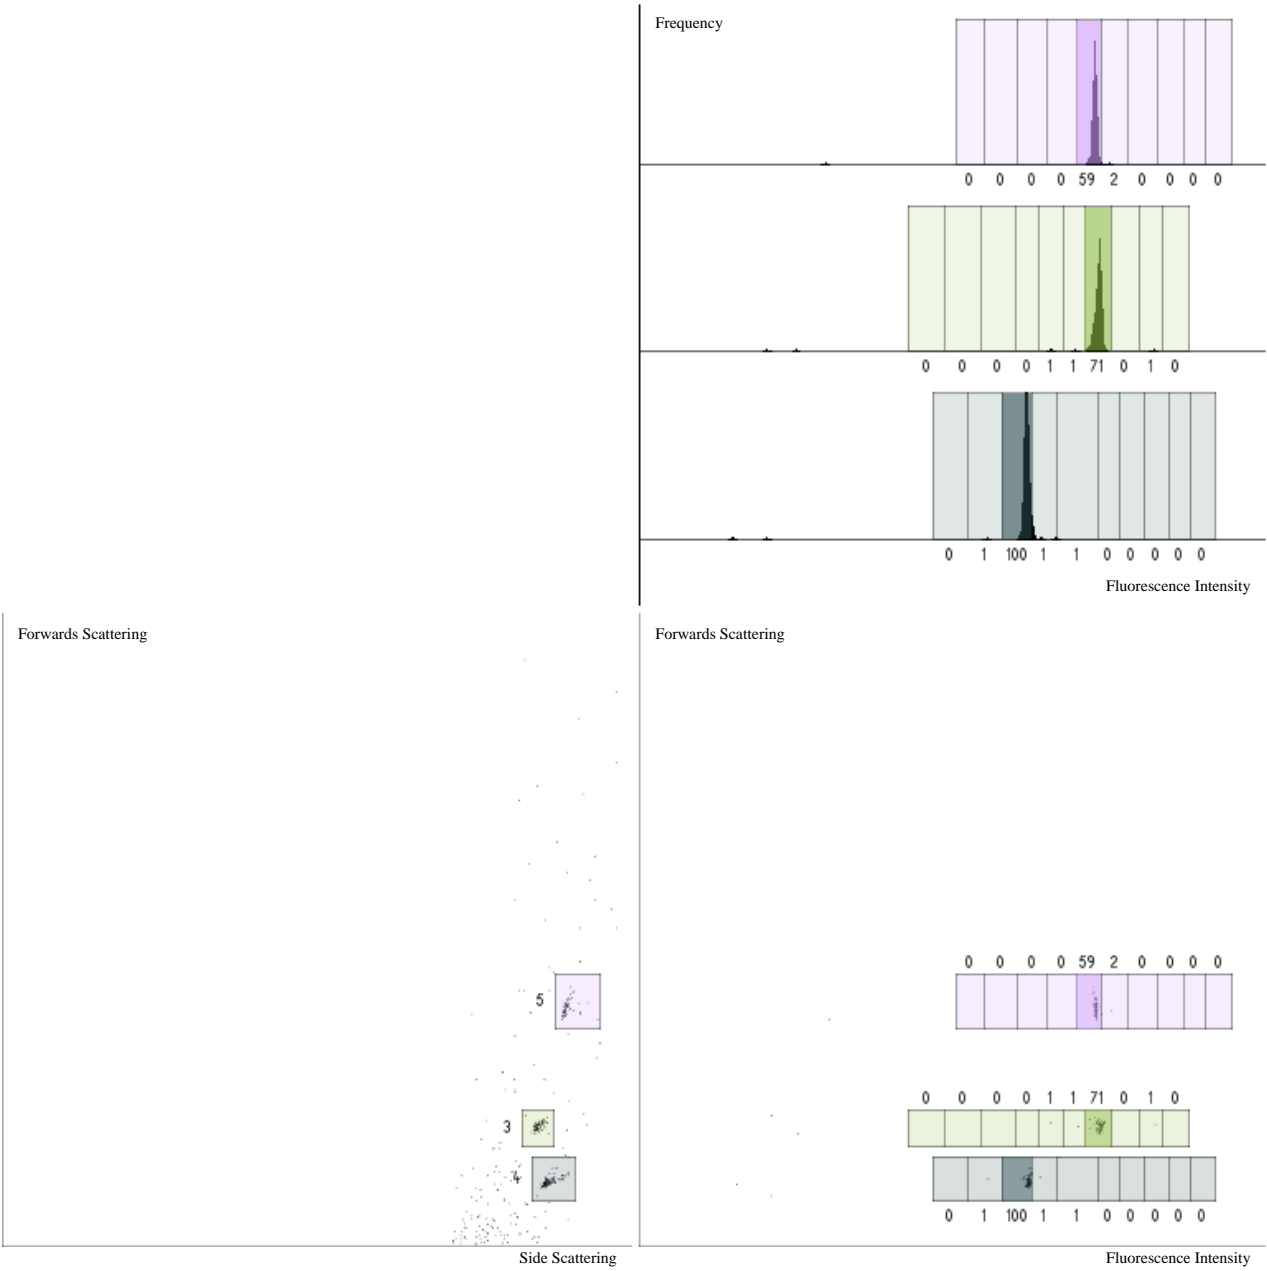

ANNEX 3: TAG DECONVOLUTION - BEAD 499

Passes flow sorting criteria: Yes  
Passes tag deconvolution criteria: Yes  
Included in protocol analysis: Yes  
Protocol: 3, 5, 9, 9  
Filename: Bin9\_plateA0\_G2.fcs  
Split 1: Petrol shading  
Split 2: Green shading  
Split 3: Violet shading

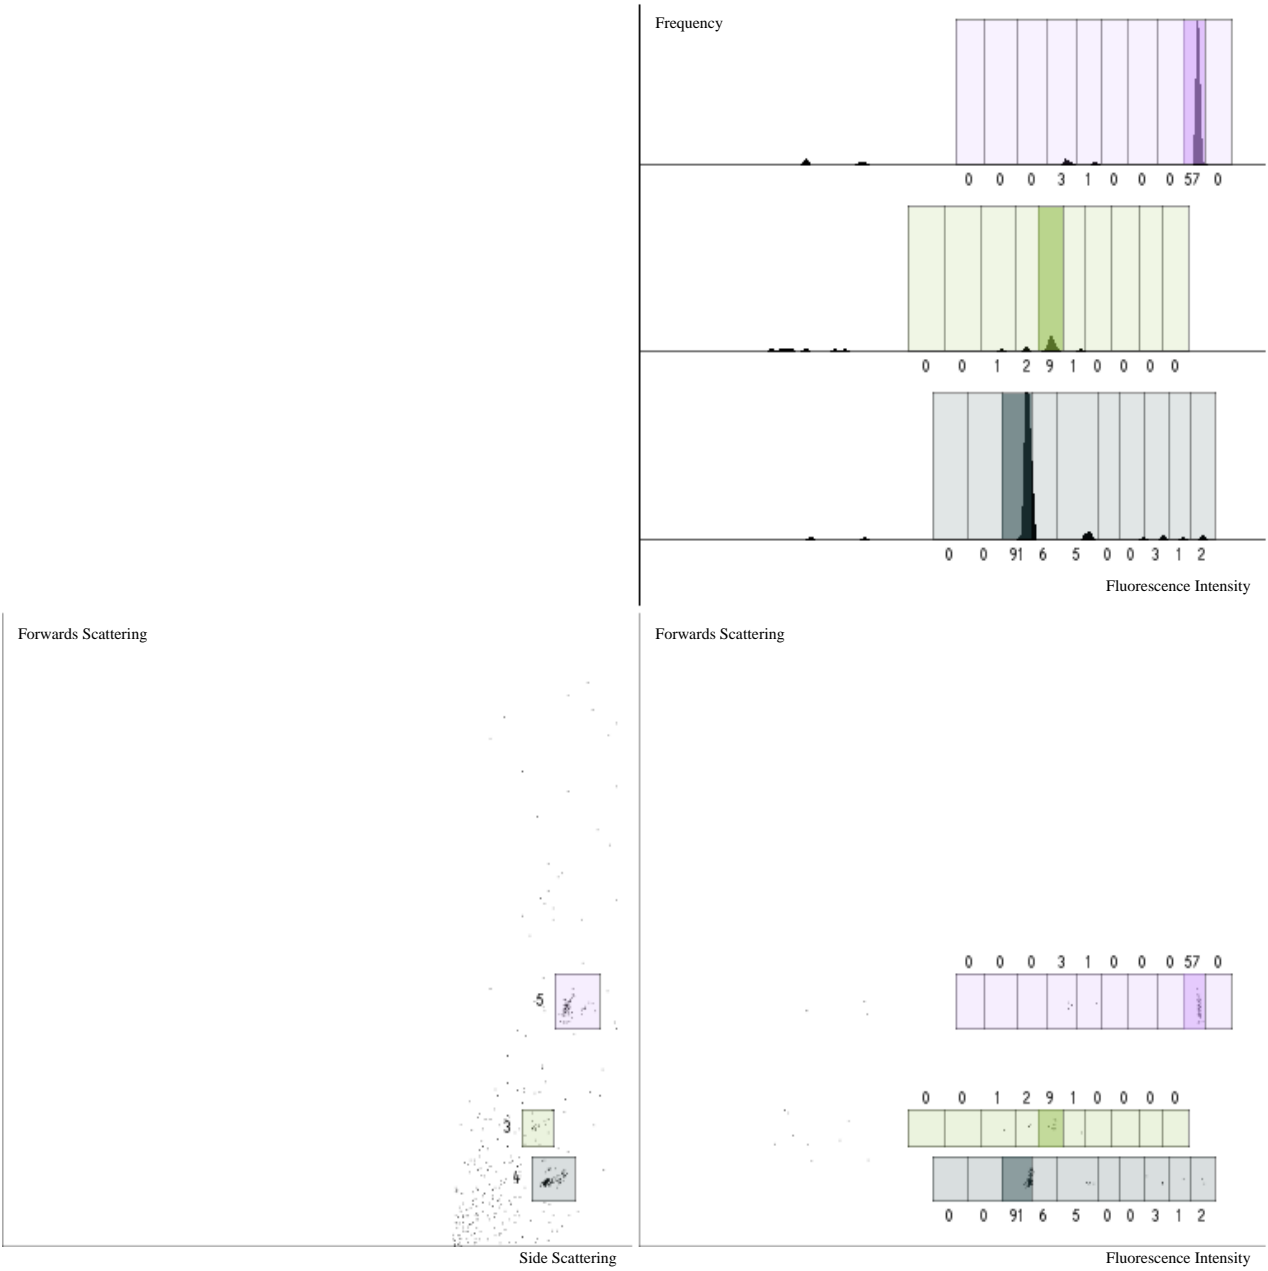

ANNEX 3: TAG DECONVOLUTION - BEAD 500

Passes flow sorting criteria: Yes  
Passes tag deconvolution criteria: Yes  
Included in protocol analysis: Yes  
Protocol: 9, 1, 1, 9  
Filename: Bin9\_plateA0\_G3.fcs  
Split 1: Petrol shading  
Split 2: Green shading  
Split 3: Violet shading

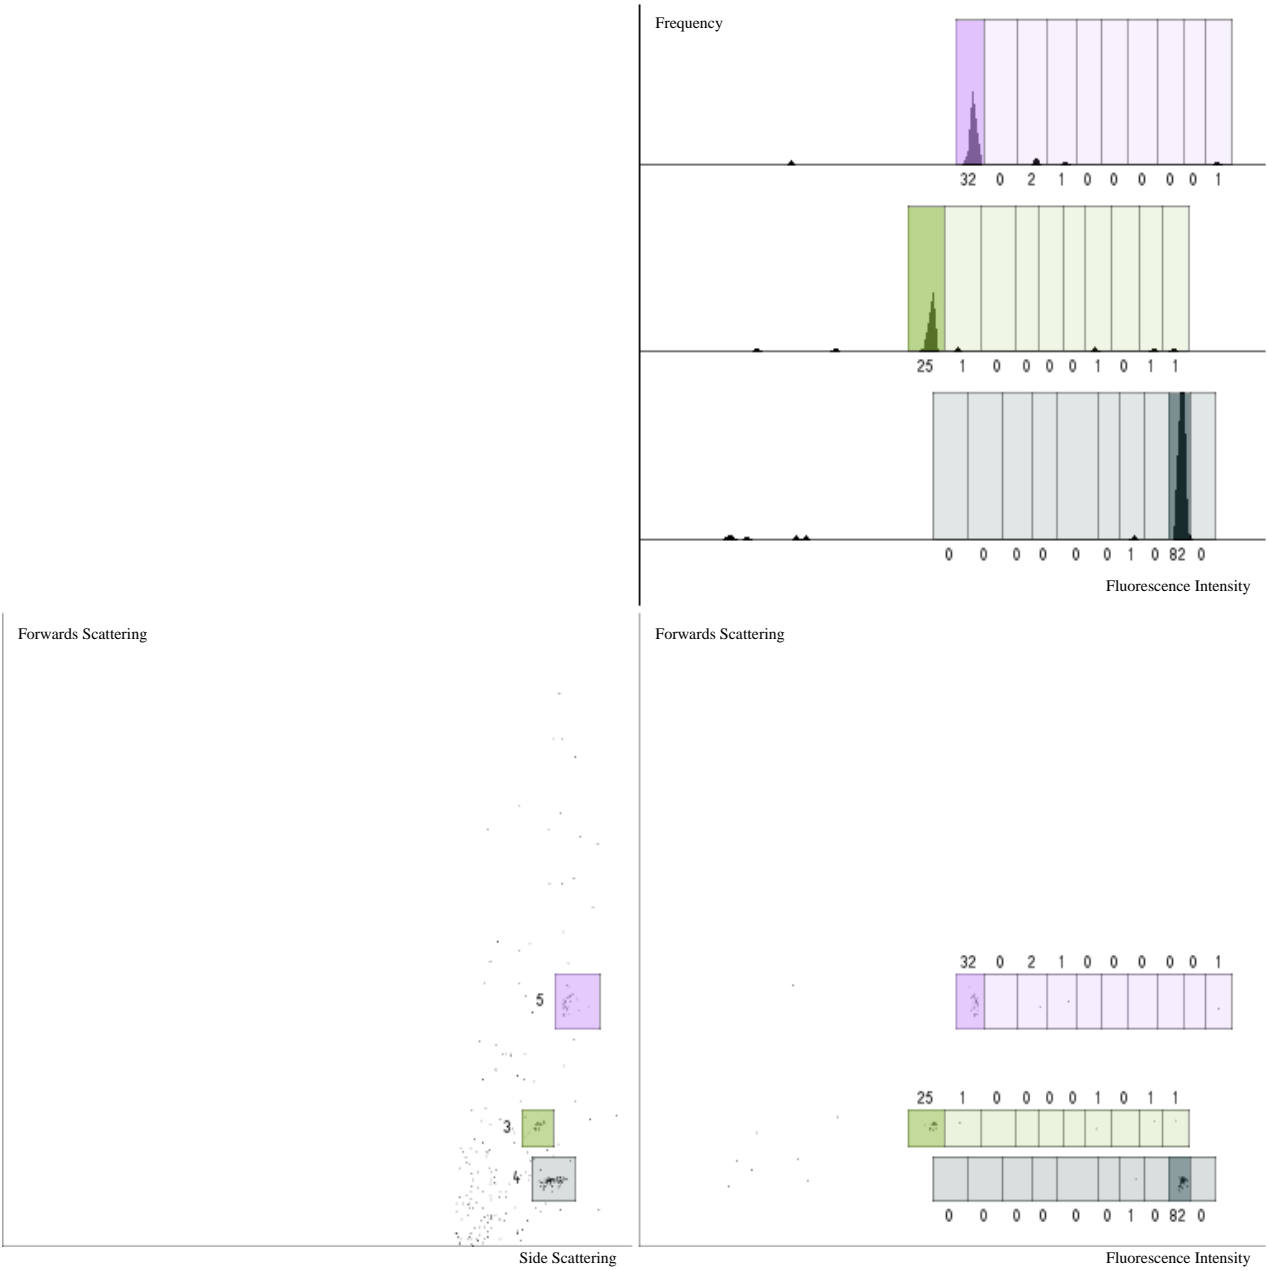

ANNEX 3: TAG DECONVOLUTION - BEAD 501

Passes flow sorting criteria: Yes  
Passes tag deconvolution criteria: Yes  
Included in protocol analysis: Yes  
Protocol: 7, 9, 1, 9  
Filename: Bin9\_plateA0\_G4.fcs  
Split 1: Petrol shading  
Split 2: Green shading  
Split 3: Violet shading

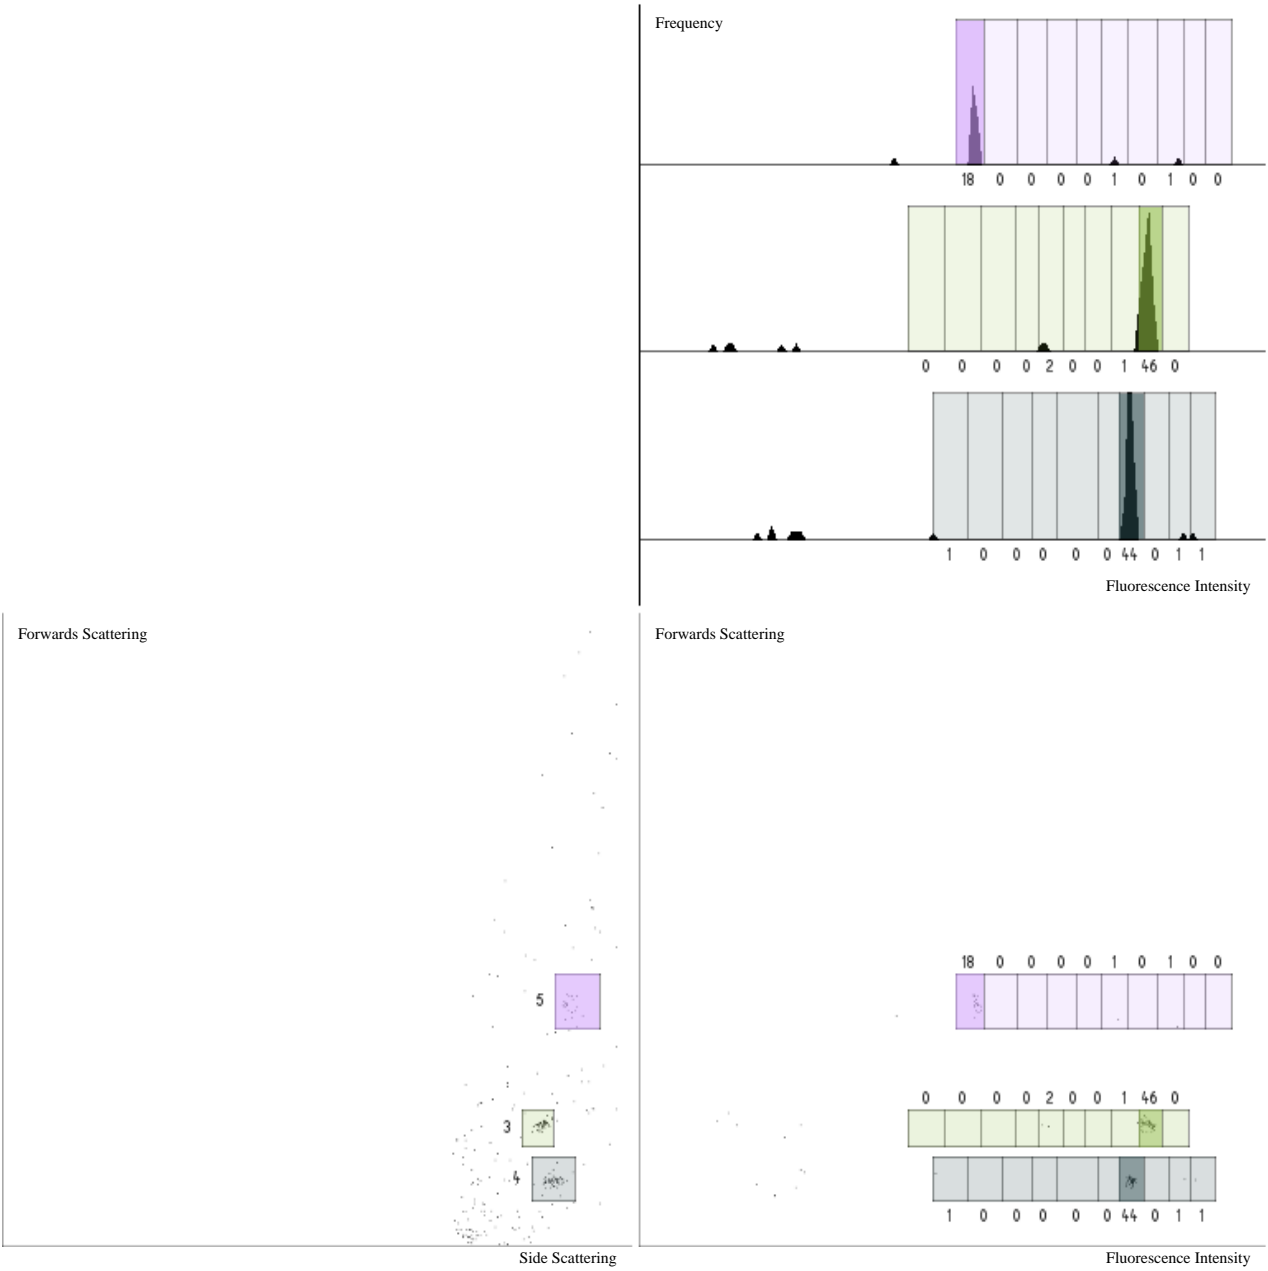

ANNEX 3: TAG DECONVOLUTION - BEAD 502

Passes flow sorting criteria: Yes  
Passes tag deconvolution criteria: Yes  
Included in protocol analysis: Yes  
Protocol: 2, 6, 9, 9  
Filename: Bin9\_plateA0\_G6.fcs  
Split 1: Petrol shading  
Split 2: Green shading  
Split 3: Violet shading

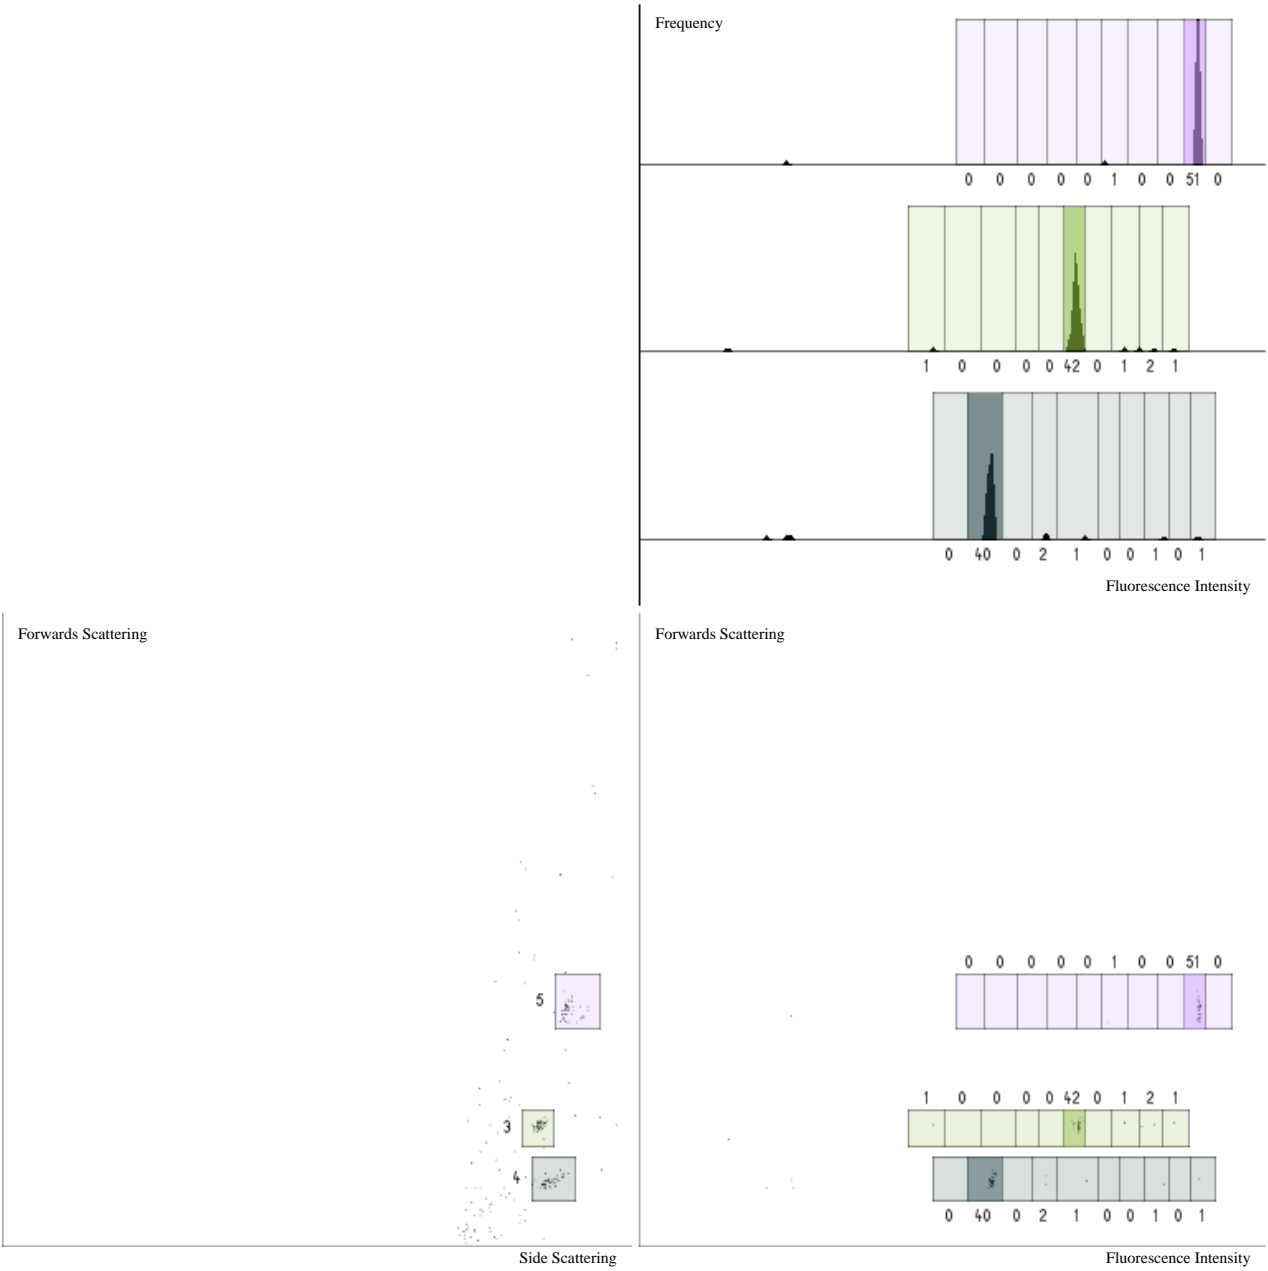



ANNEX 3: TAG DECONVOLUTION - BEAD 503

Passes flow sorting criteria: Yes  
Passes tag deconvolution criteria: Yes  
Included in protocol analysis: Yes  
Protocol: 3, 5, 5, 9  
Filename: Bin9\_plateA0\_G7.fcs  
Split 1: Petrol shading  
Split 2: Green shading  
Split 3: Violet shading

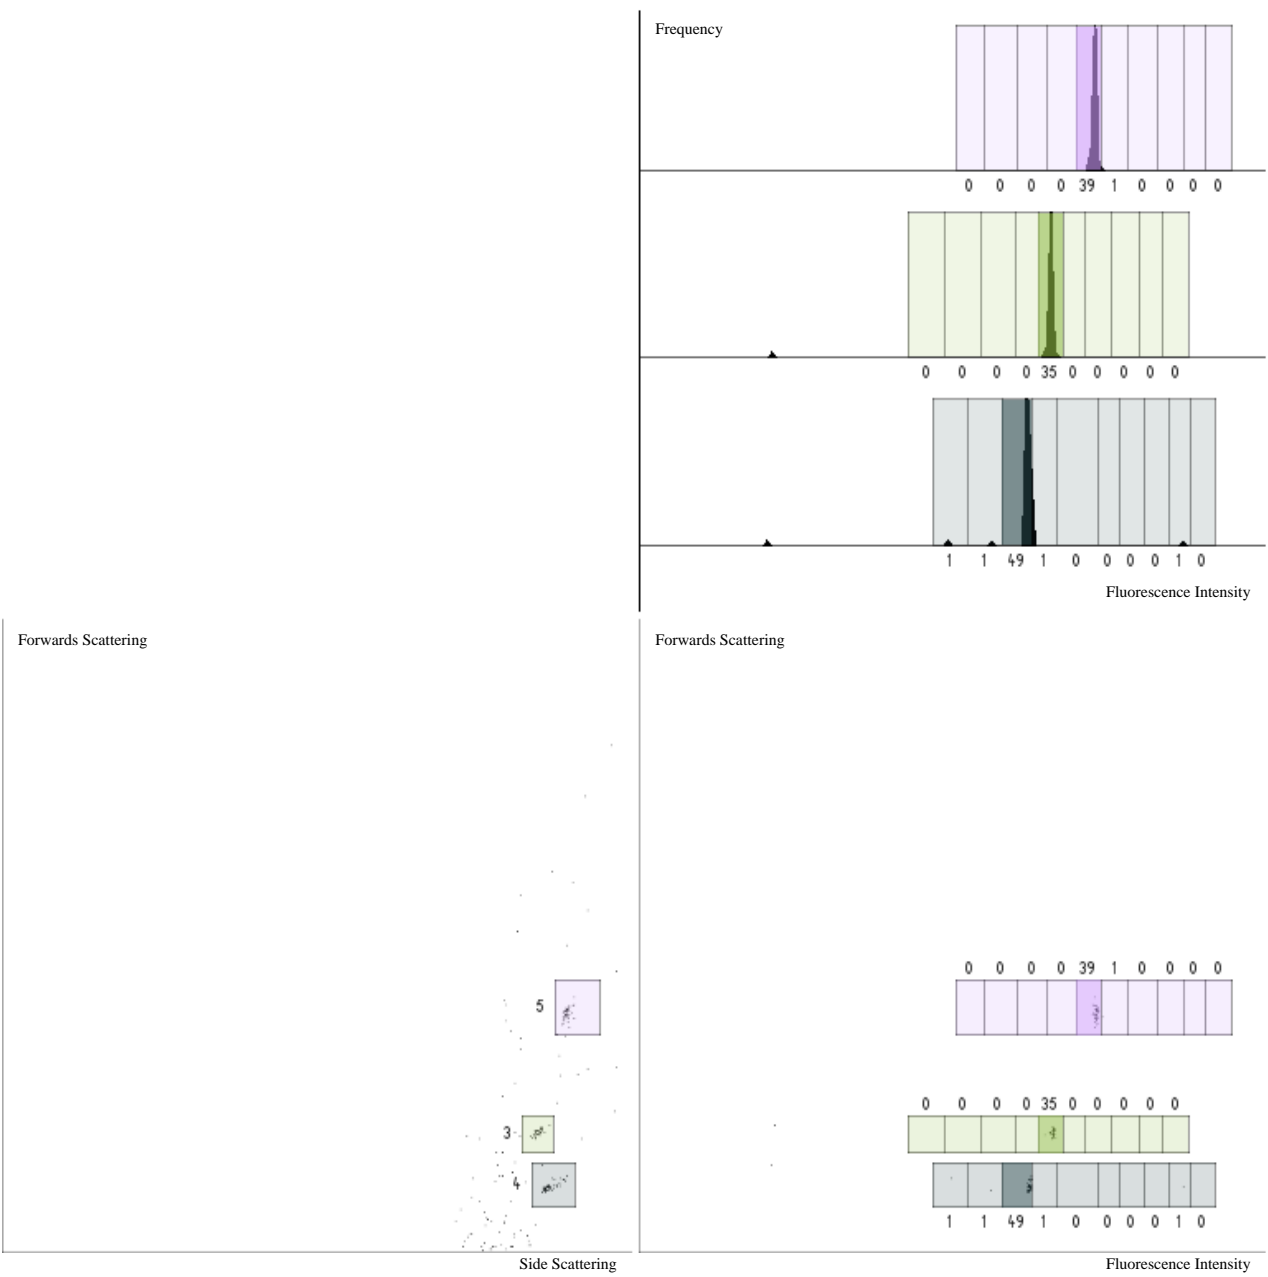

ANNEX 3: TAG DECONVOLUTION - BEAD 504

Passes flow sorting criteria: Yes  
Passes tag deconvolution criteria: No  
Included in protocol analysis: No  
Protocol: N/A  
Filename: Bin9\_plateA0\_G8.fcs  
Split 1: Petrol shading  
Split 2: Green shading  
Split 3: Violet shading

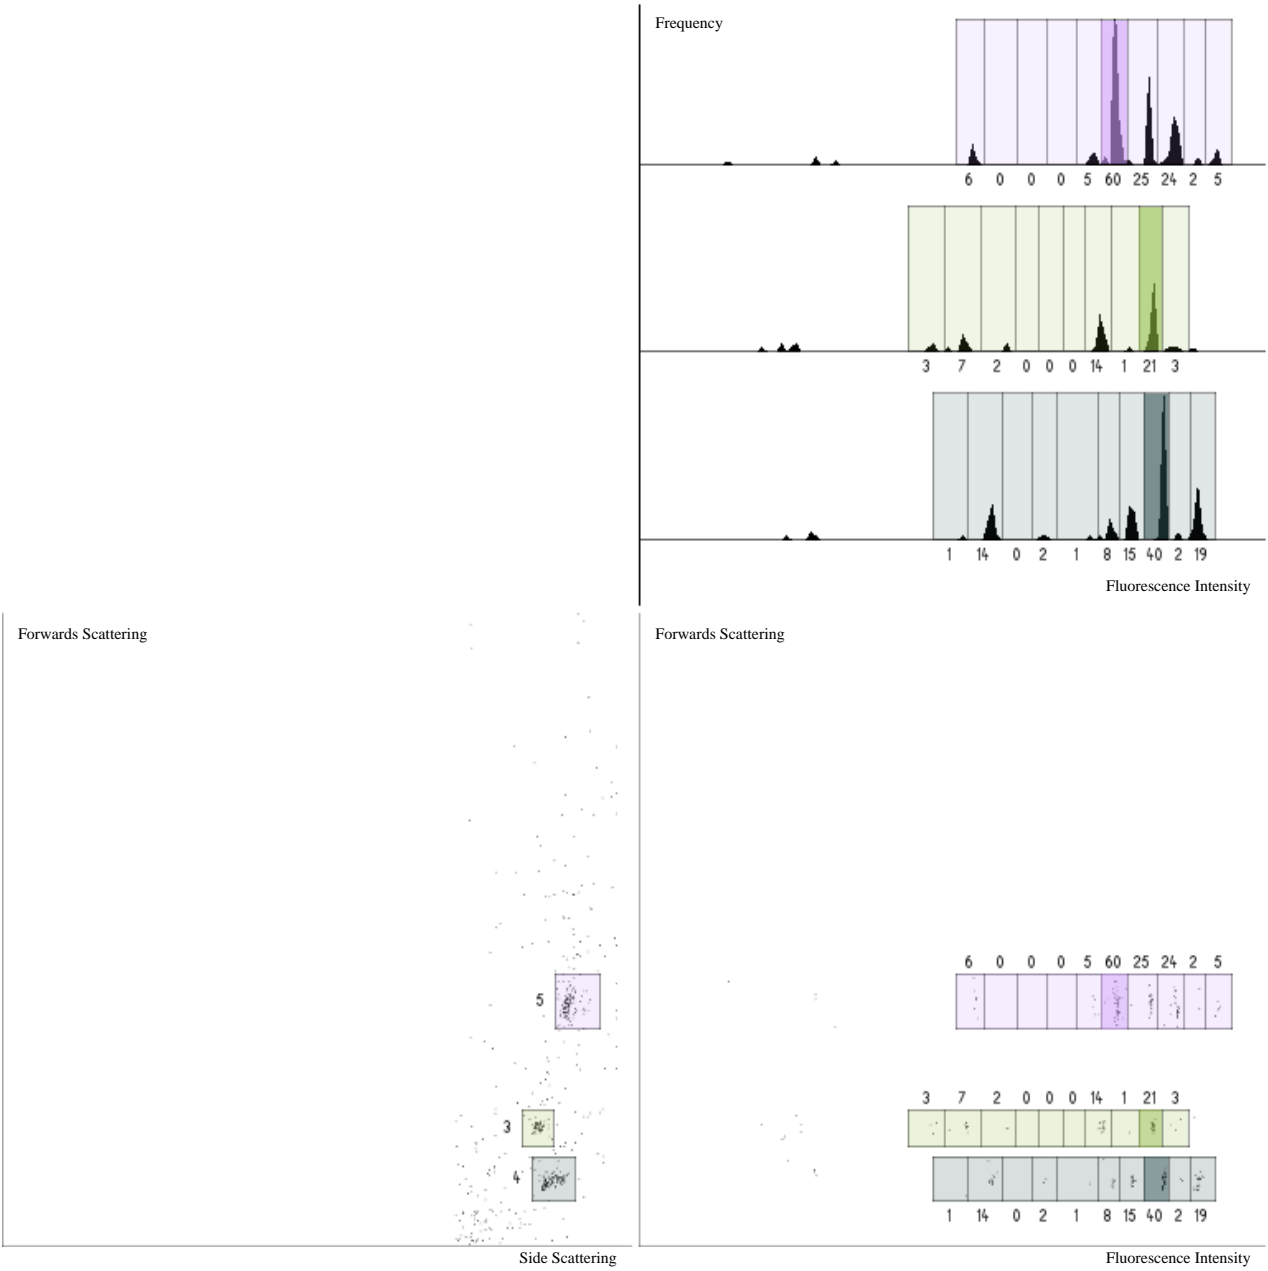

ANNEX 3: TAG DECONVOLUTION - BEAD 505

Passes flow sorting criteria: Yes  
Passes tag deconvolution criteria: Yes  
Included in protocol analysis: Yes  
Protocol: 2, 9, 3, 9  
Filename: Bin9\_plateA0\_G9.fcs  
Split 1: Petrol shading  
Split 2: Green shading  
Split 3: Violet shading

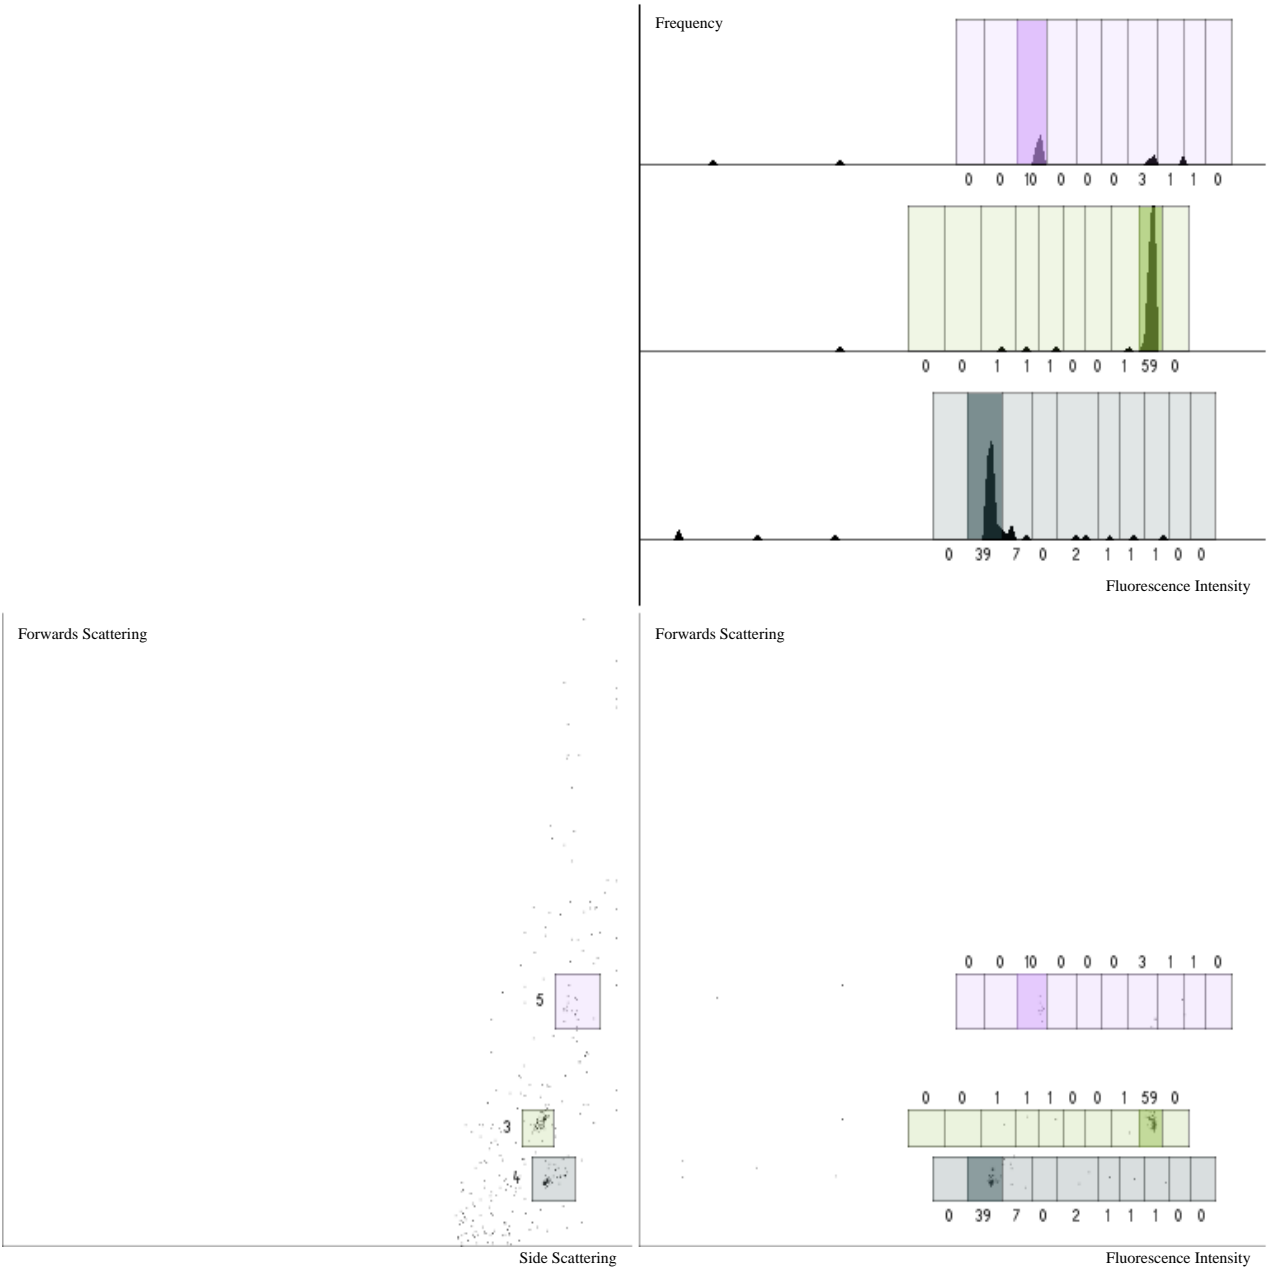

ANNEX 3: TAG DECONVOLUTION - BEAD 506

Passes flow sorting criteria: Yes  
Passes tag deconvolution criteria: No  
Included in protocol analysis: No  
Protocol: N/A  
Filename: Bin9\_plateA0\_G10.fcs  
Split 1: Petrol shading  
Split 2: Green shading  
Split 3: Violet shading

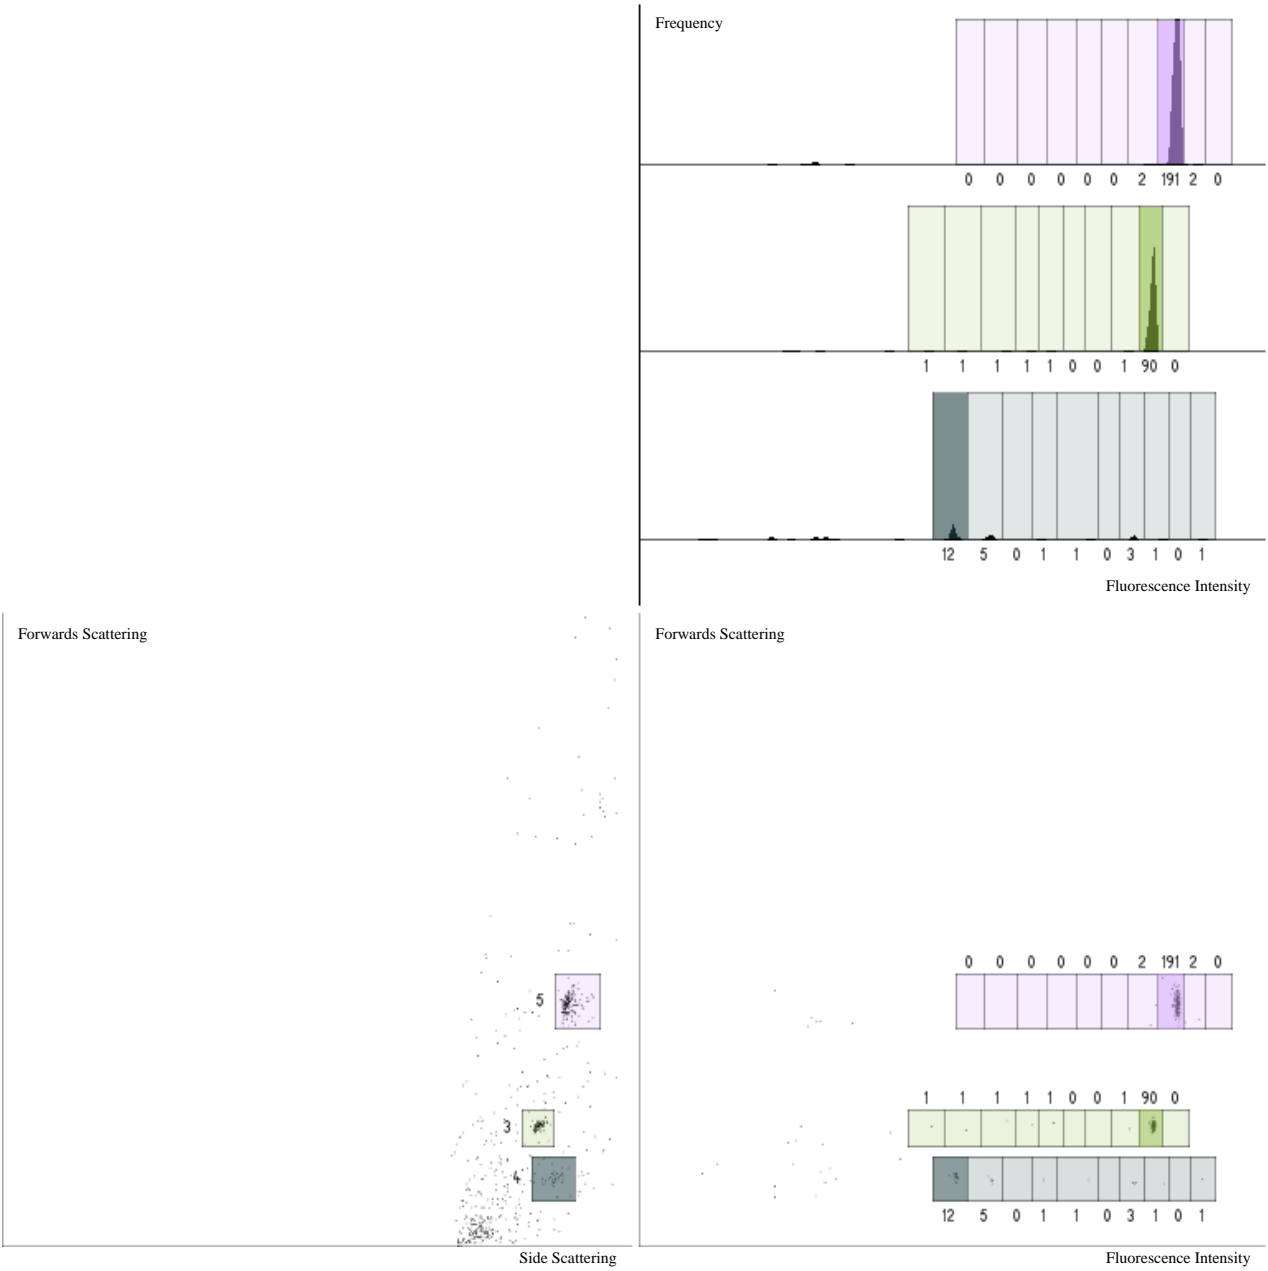

ANNEX 3: TAG DECONVOLUTION - BEAD 507

Passes flow sorting criteria: Yes  
Passes tag deconvolution criteria: No  
Included in protocol analysis: No  
Protocol: N/A  
Filename: Bin9\_plateA0\_G11.fcs  
Split 1: Petrol shading  
Split 2: Green shading  
Split 3: Violet shading

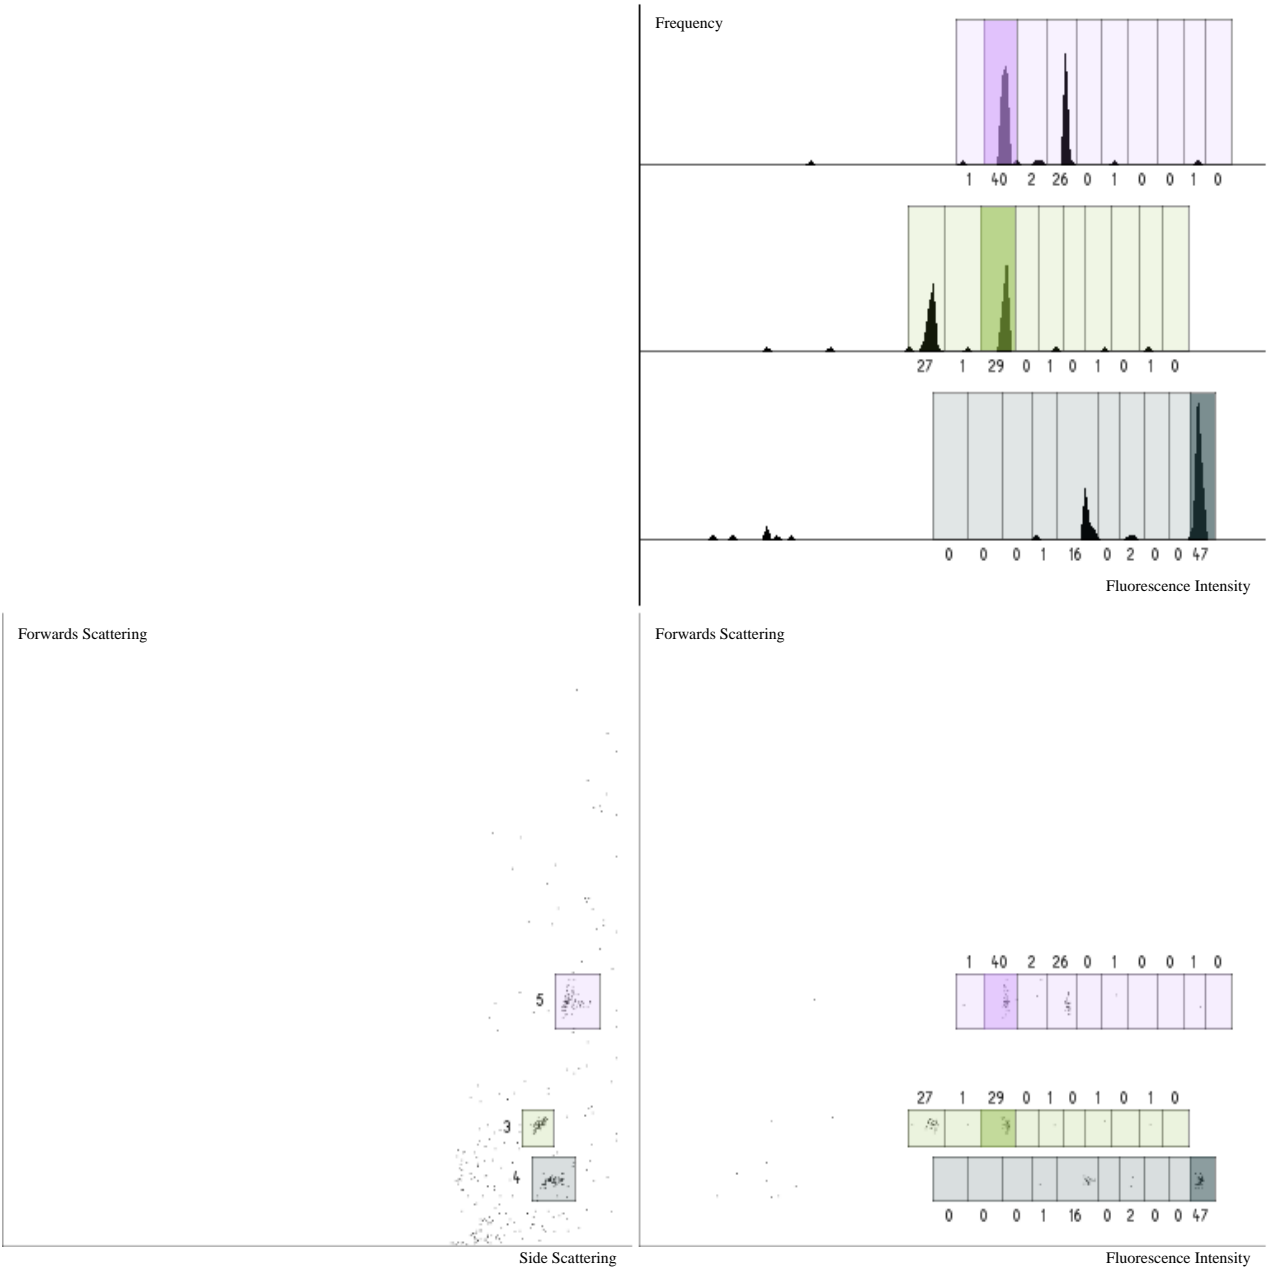

ANNEX 3: TAG DECONVOLUTION - BEAD 508

Passes flow sorting criteria: Yes  
Passes tag deconvolution criteria: Yes  
Included in protocol analysis: Yes  
Protocol: 5, 10, 9, 9  
Filename: Bin9\_plateA0\_G12.fcs  
Split 1: Petrol shading  
Split 2: Green shading  
Split 3: Violet shading

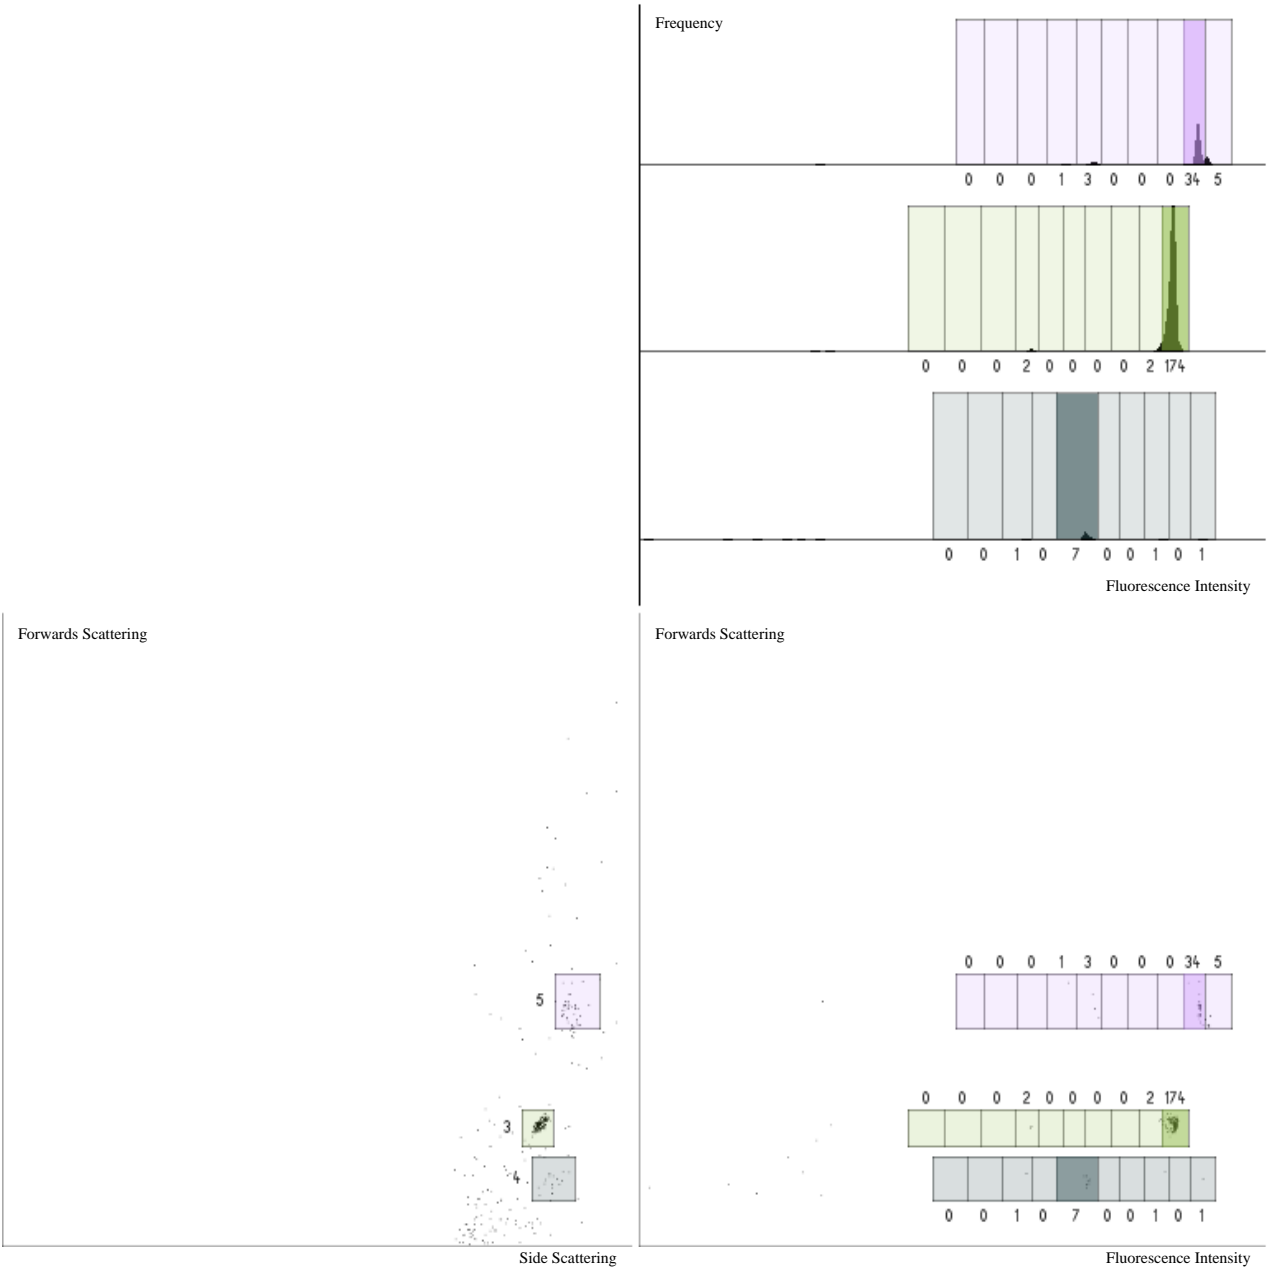

ANNEX 3: TAG DECONVOLUTION - BEAD 509

Passes flow sorting criteria: Yes  
Passes tag deconvolution criteria: Yes  
Included in protocol analysis: Yes  
Protocol: 2, 3, 8, 9  
Filename: Bin9\_plateA0\_H1.fcs  
Split 1: Petrol shading  
Split 2: Green shading  
Split 3: Violet shading

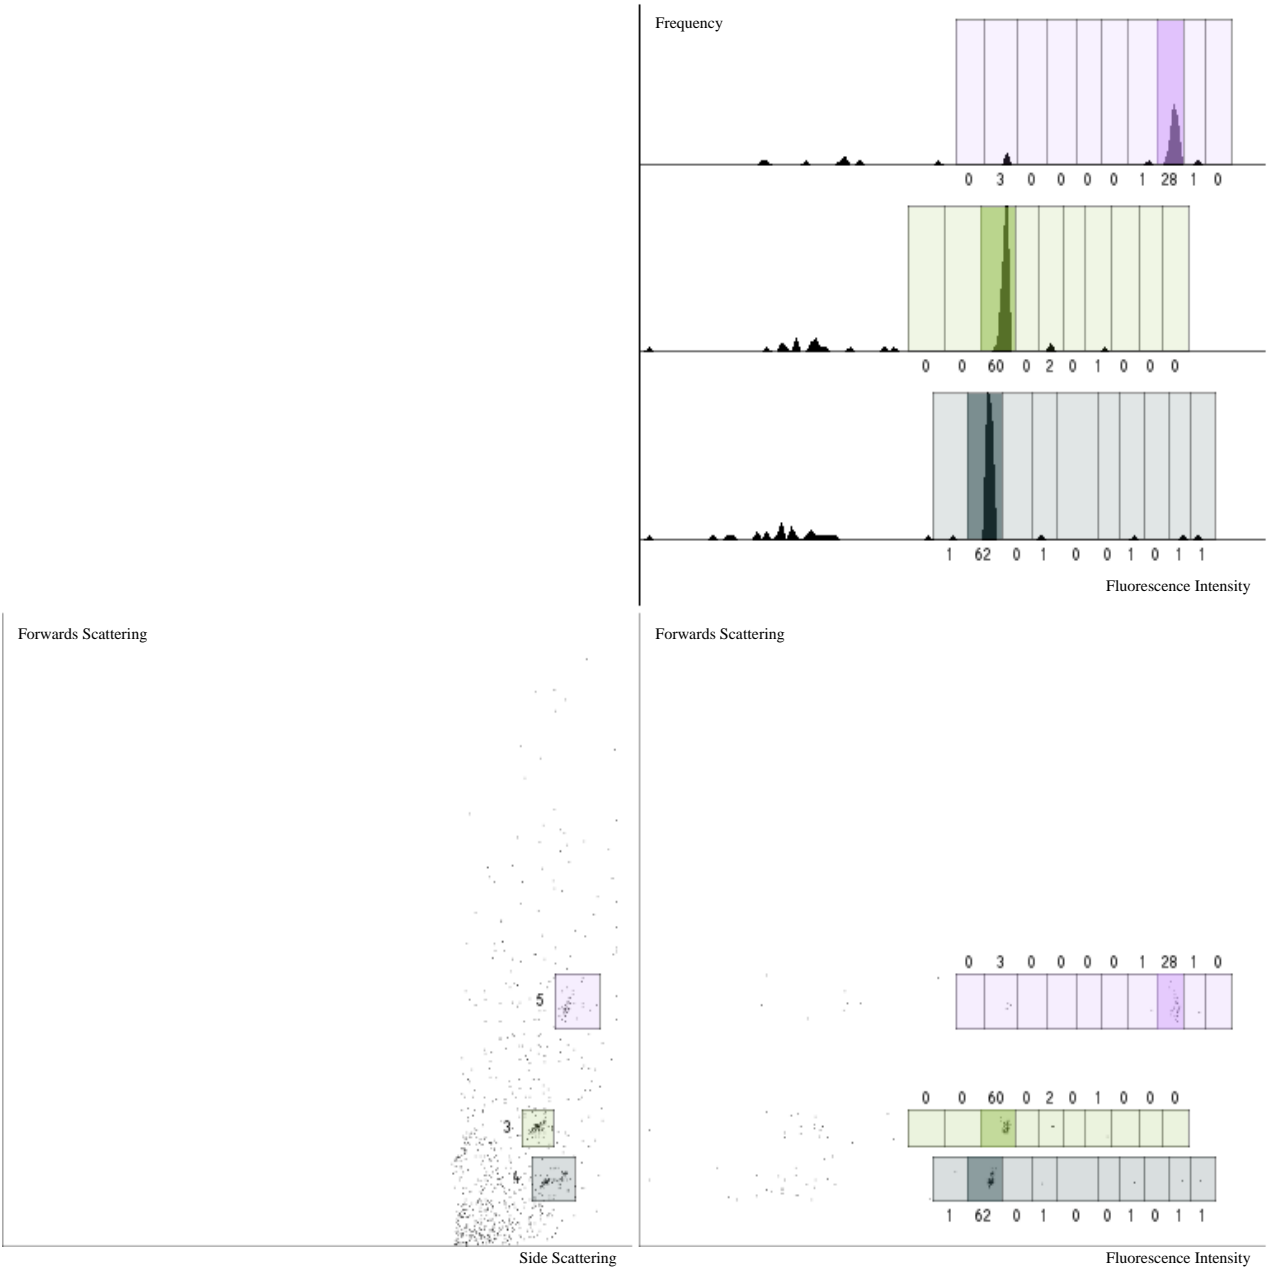

ANNEX 3: TAG DECONVOLUTION - BEAD 510

Passes flow sorting criteria: Yes  
Passes tag deconvolution criteria: Yes  
Included in protocol analysis: Yes  
Protocol: 6, 10, 1, 9  
Filename: Bin9\_plateA0\_H2.fcs  
Split 1: Petrol shading  
Split 2: Green shading  
Split 3: Violet shading

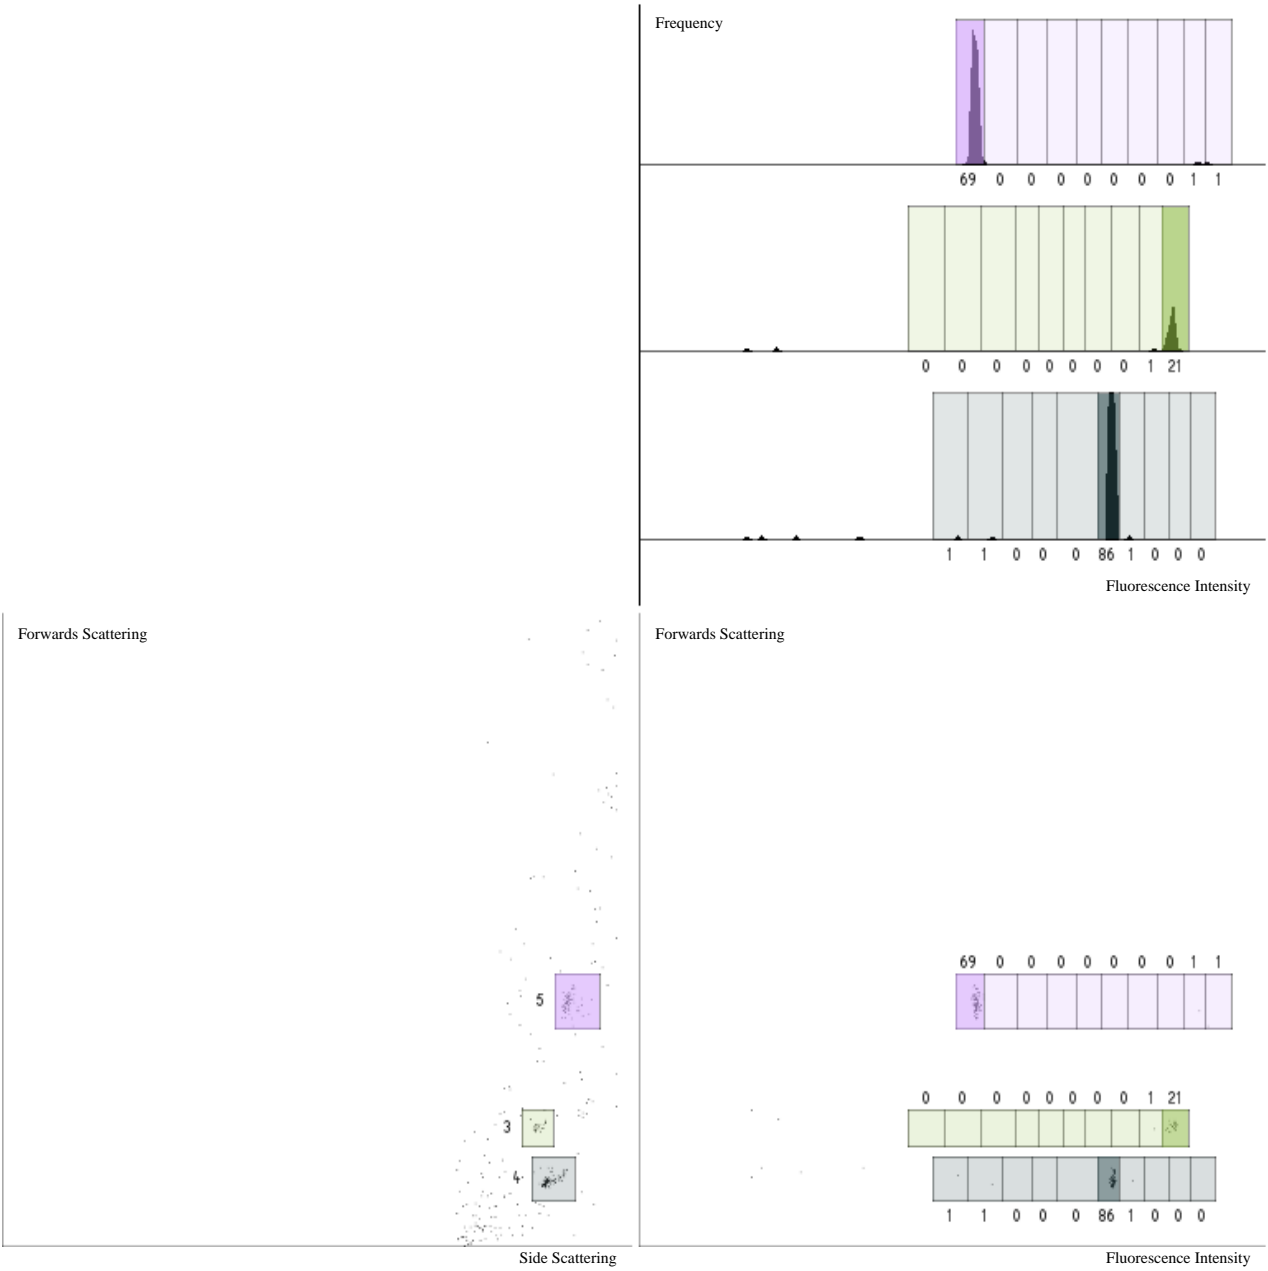



ANNEX 3: TAG DECONVOLUTION - BEAD 511

Passes flow sorting criteria: Yes  
Passes tag deconvolution criteria: Yes  
Included in protocol analysis: Yes  
Protocol: 1, 9, 9, 9  
Filename: Bin9\_plateA0\_H3.fcs  
Split 1: Petrol shading  
Split 2: Green shading  
Split 3: Violet shading

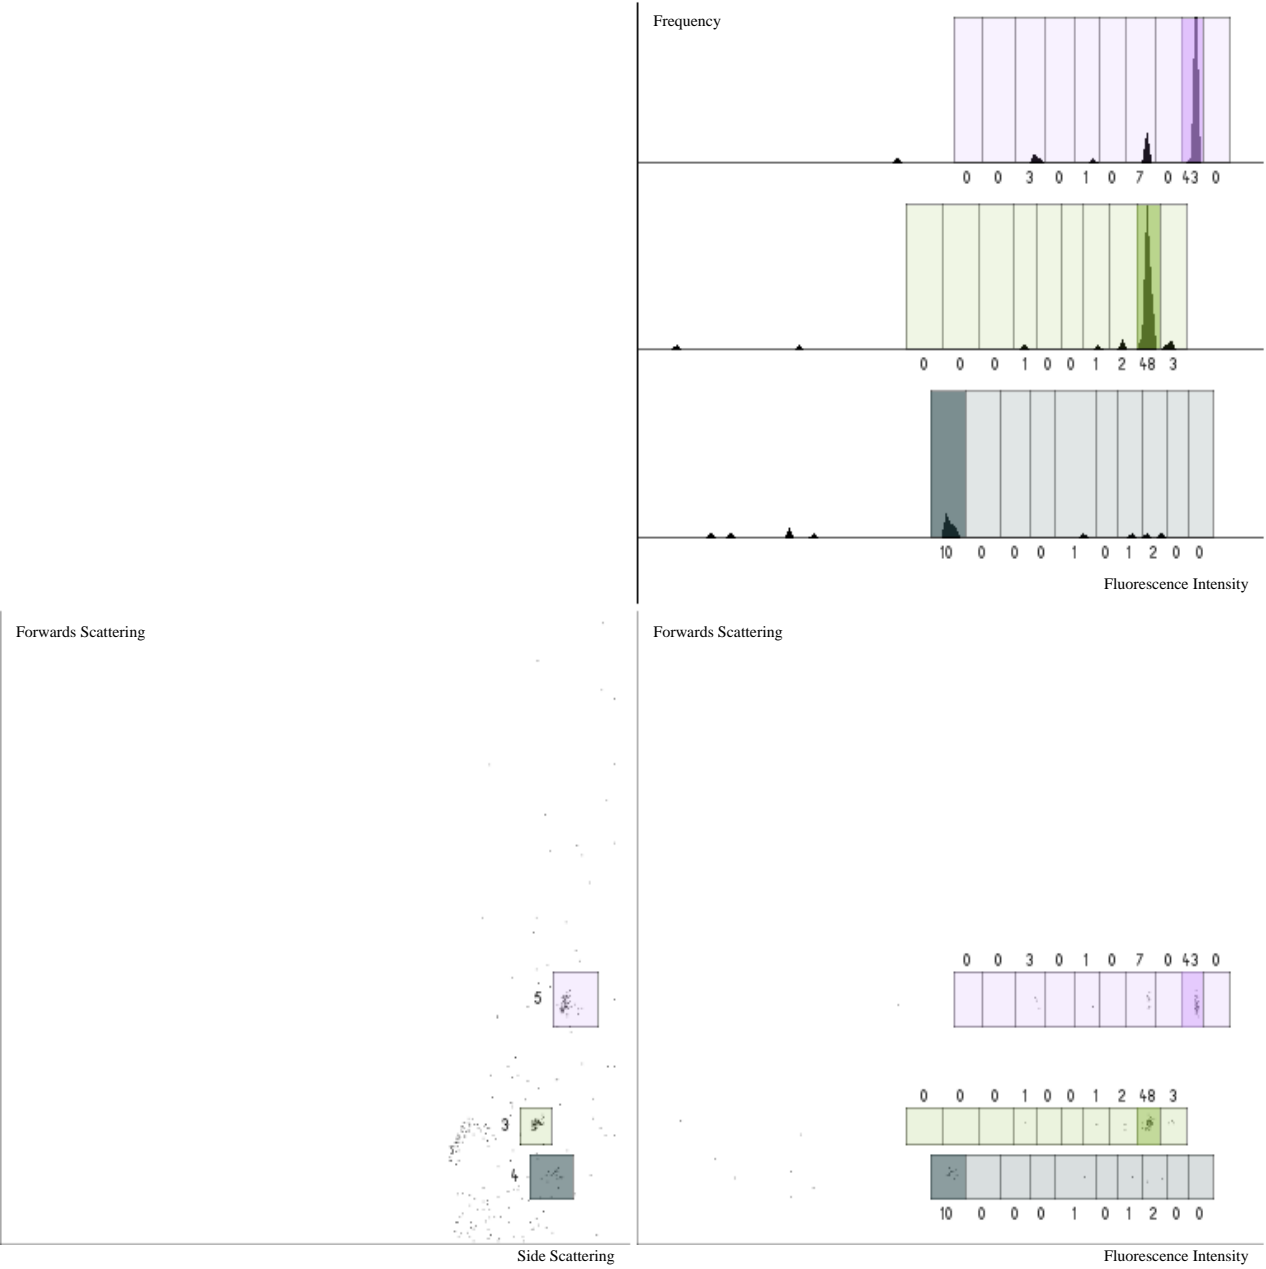

ANNEX 3: TAG DECONVOLUTION - BEAD 512

Passes flow sorting criteria: Yes  
Passes tag deconvolution criteria: Yes  
Included in protocol analysis: Yes  
Protocol: 9, 5, 4, 9  
Filename: Bin9\_plateA0\_H4.fcs  
Split 1: Petrol shading  
Split 2: Green shading  
Split 3: Violet shading

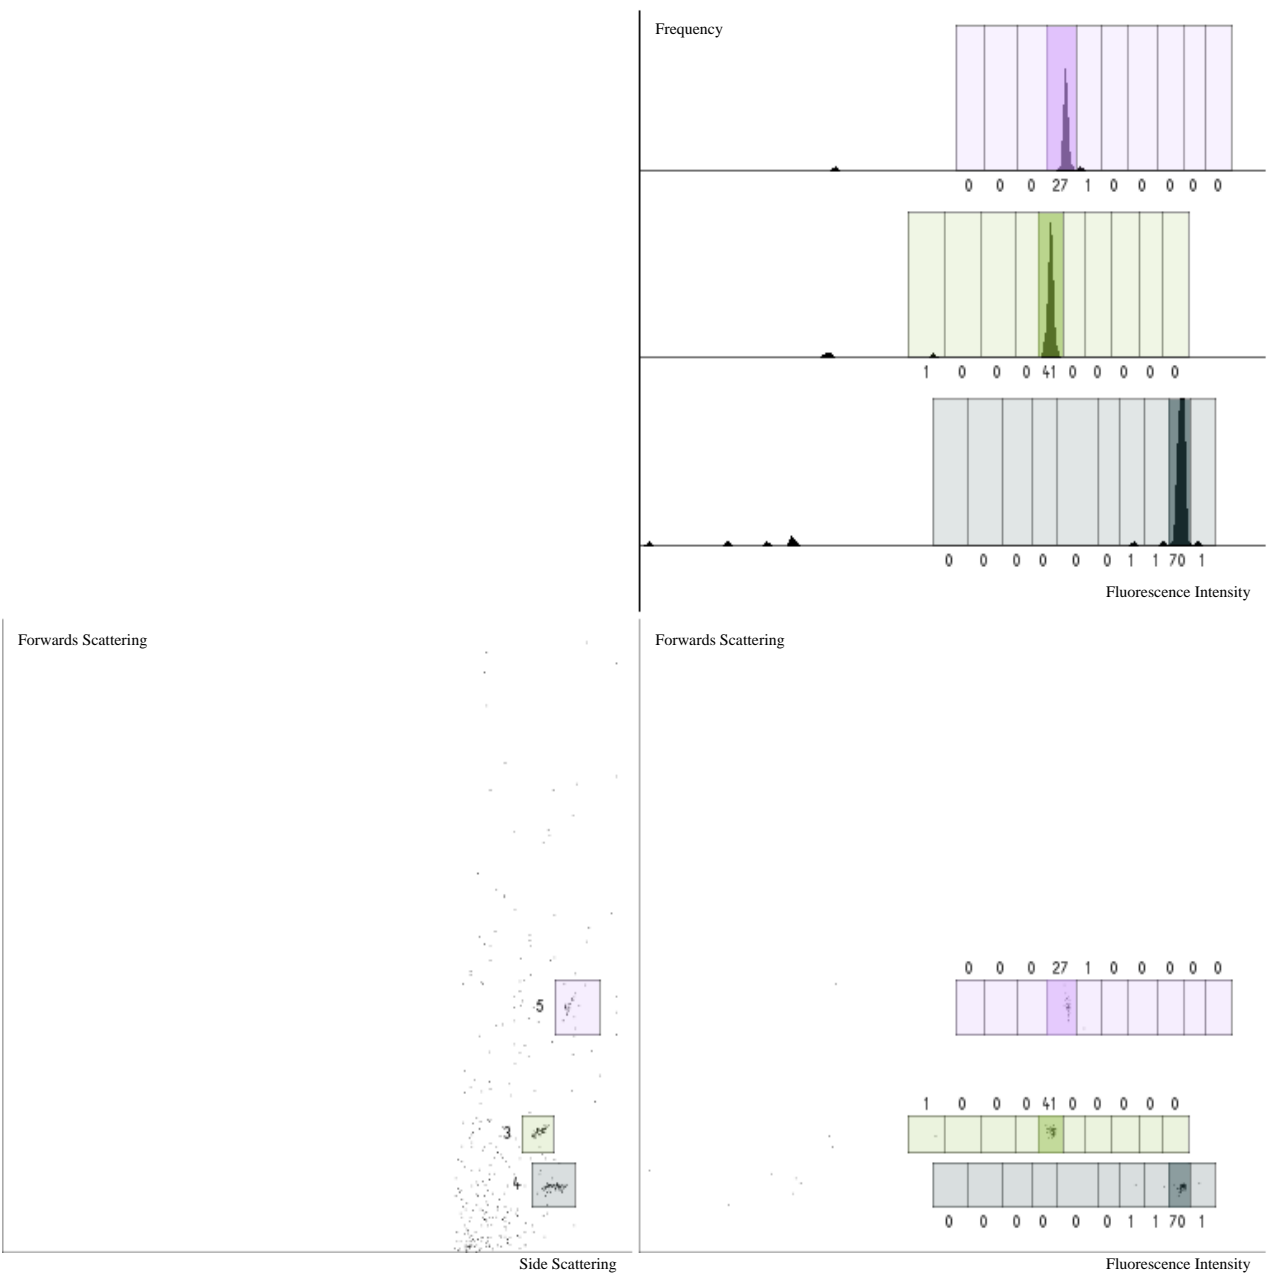

ANNEX 3: TAG DECONVOLUTION - BEAD 513

Passes flow sorting criteria: Yes  
Passes tag deconvolution criteria: Yes  
Included in protocol analysis: Yes  
Protocol: 1, 10, 1, 9  
Filename: Bin9\_plateA0\_H5.fcs  
Split 1: Petrol shading  
Split 2: Green shading  
Split 3: Violet shading

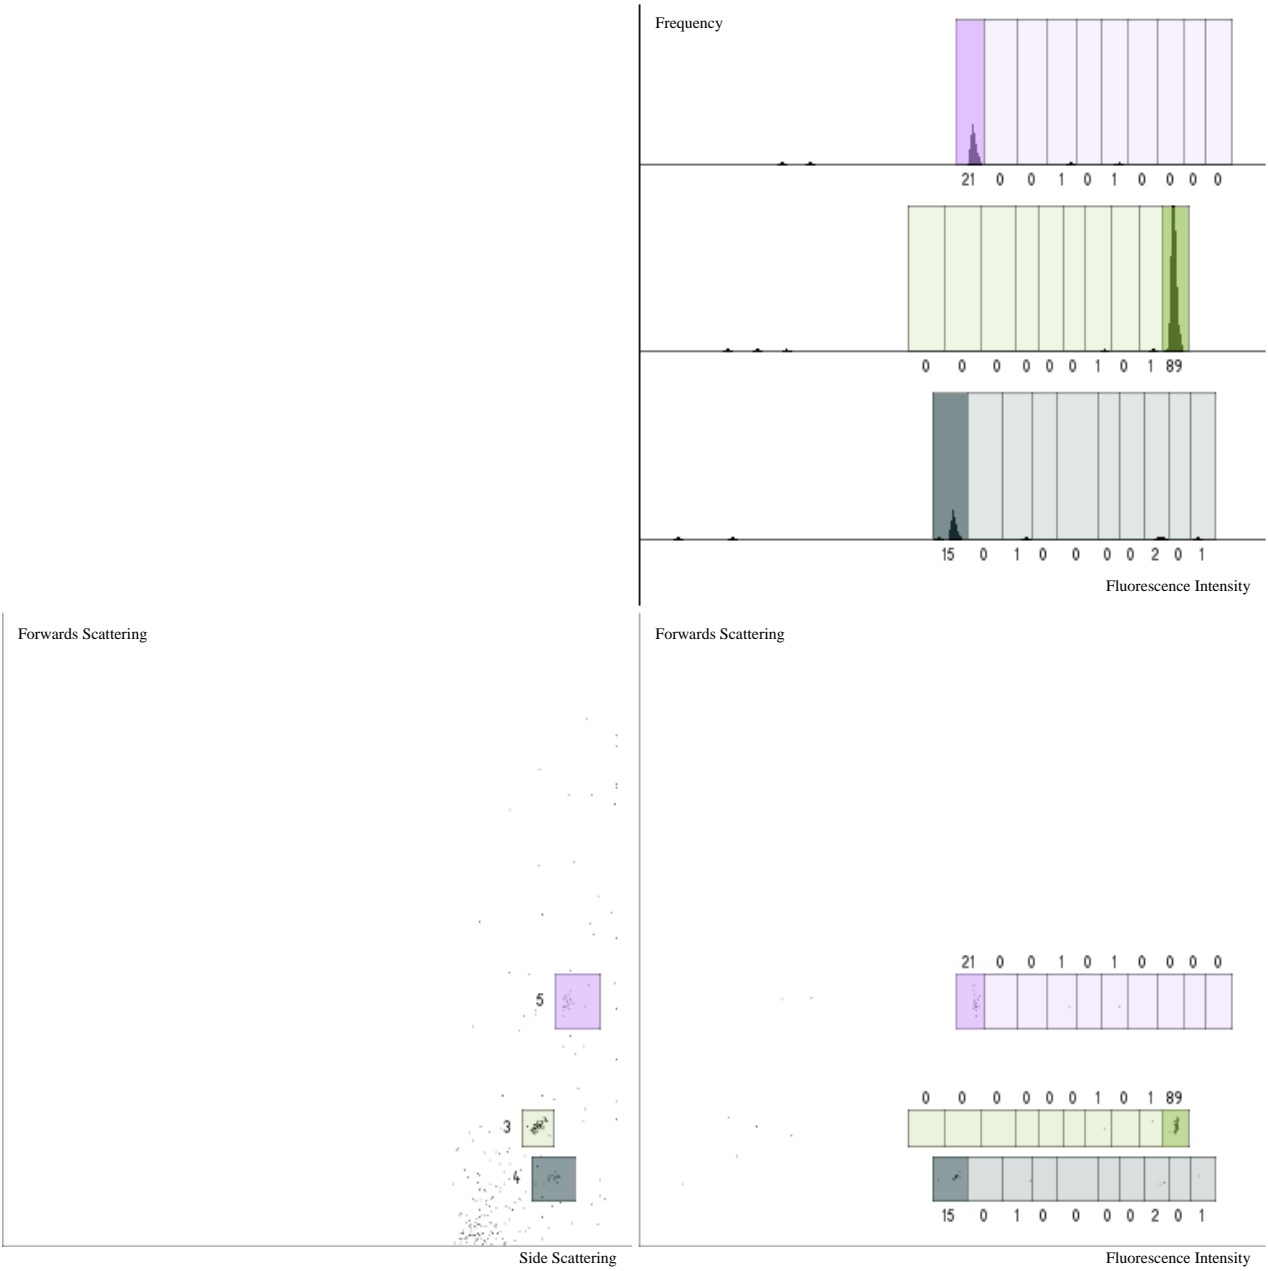

Passes flow sorting criteria: Yes  
 Passes tag deconvolution criteria: Yes  
 Included in protocol analysis: Yes  
 Protocol: 8, 8, 3, 9  
 Filename: Bin9\_plateA0\_H6.fcs  
 Split 1: Petrol shading  
 Split 2: Green shading  
 Split 3: Violet shading

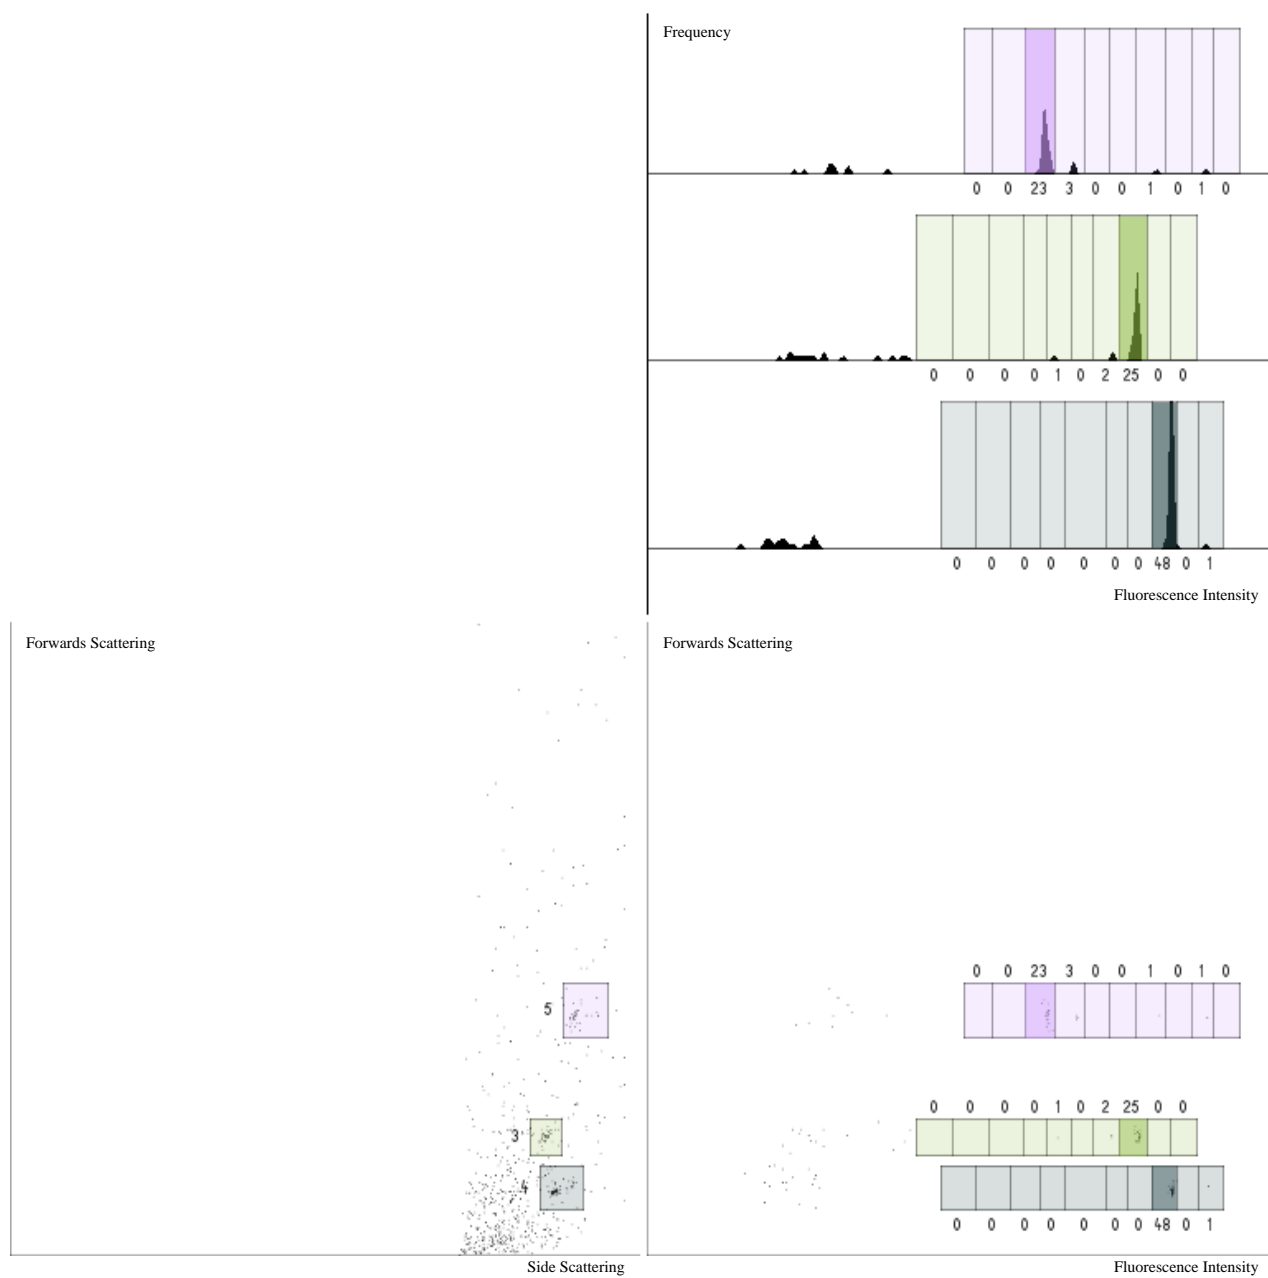

ANNEX 3: TAG DECONVOLUTION - BEAD 515

Passes flow sorting criteria: Yes  
Passes tag deconvolution criteria: No  
Included in protocol analysis: No  
Protocol: N/A  
Filename: Bin9\_plateA0\_H7.fcs  
Split 1: Petrol shading  
Split 2: Green shading  
Split 3: Violet shading

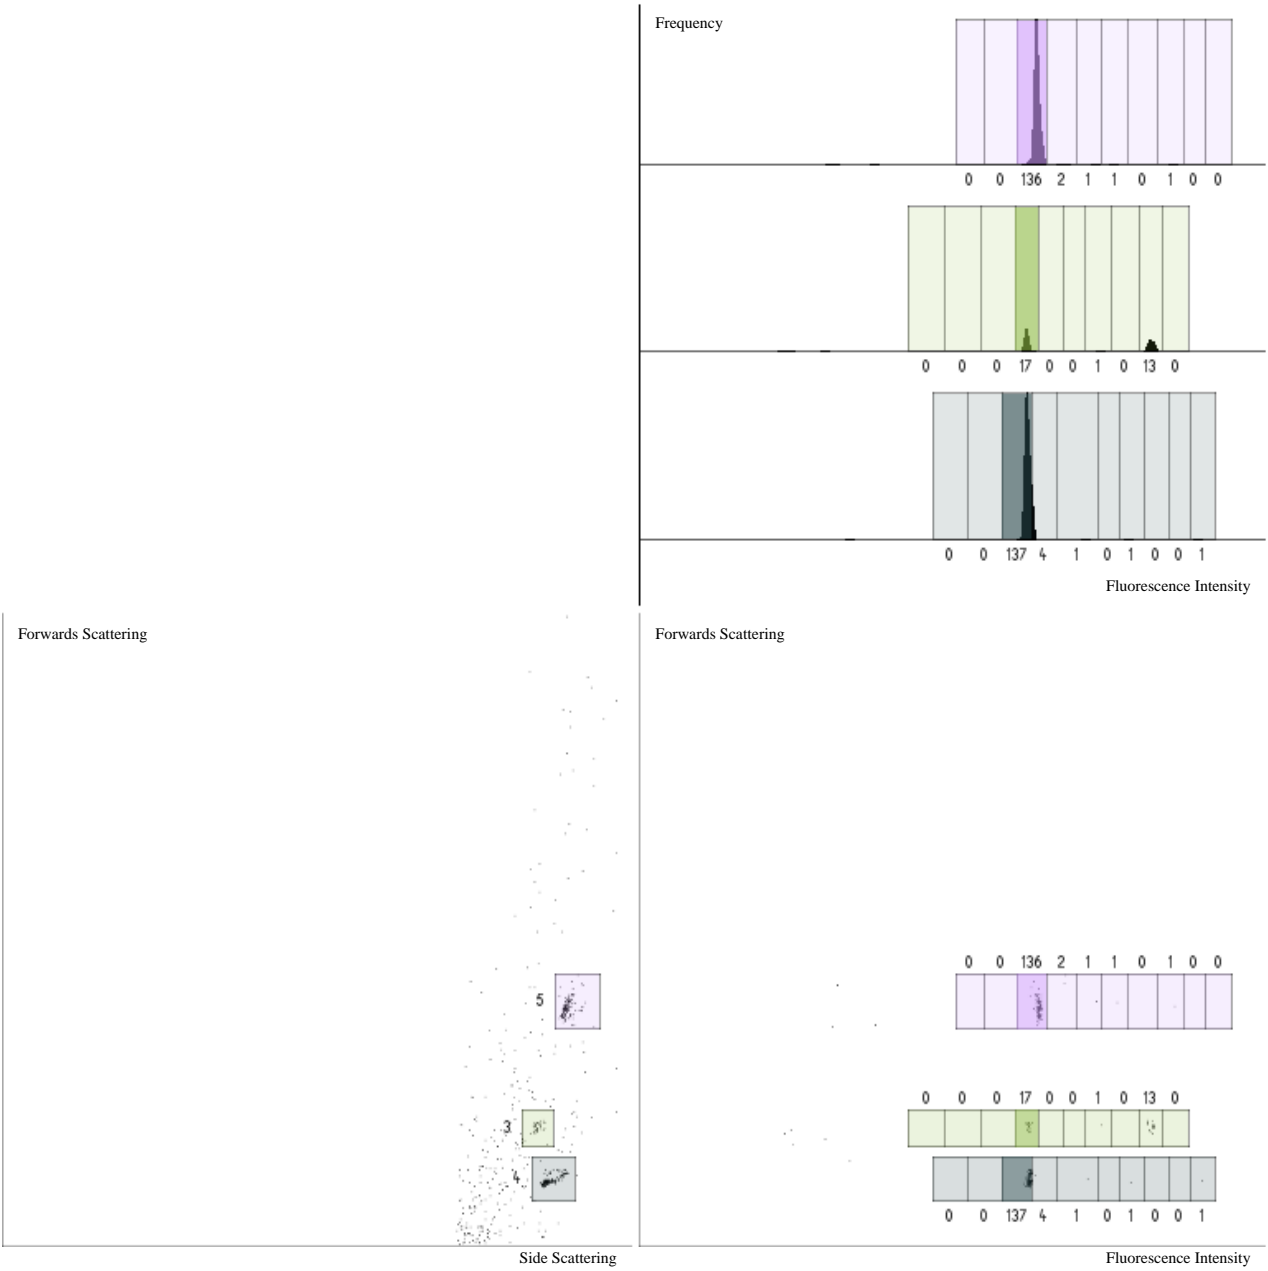

ANNEX 3: TAG DECONVOLUTION - BEAD 516

Passes flow sorting criteria: Yes  
Passes tag deconvolution criteria: No  
Included in protocol analysis: No  
Protocol: N/A  
Filename: Bin9\_plateA0\_H8.fcs  
Split 1: Petrol shading  
Split 2: Green shading  
Split 3: Violet shading

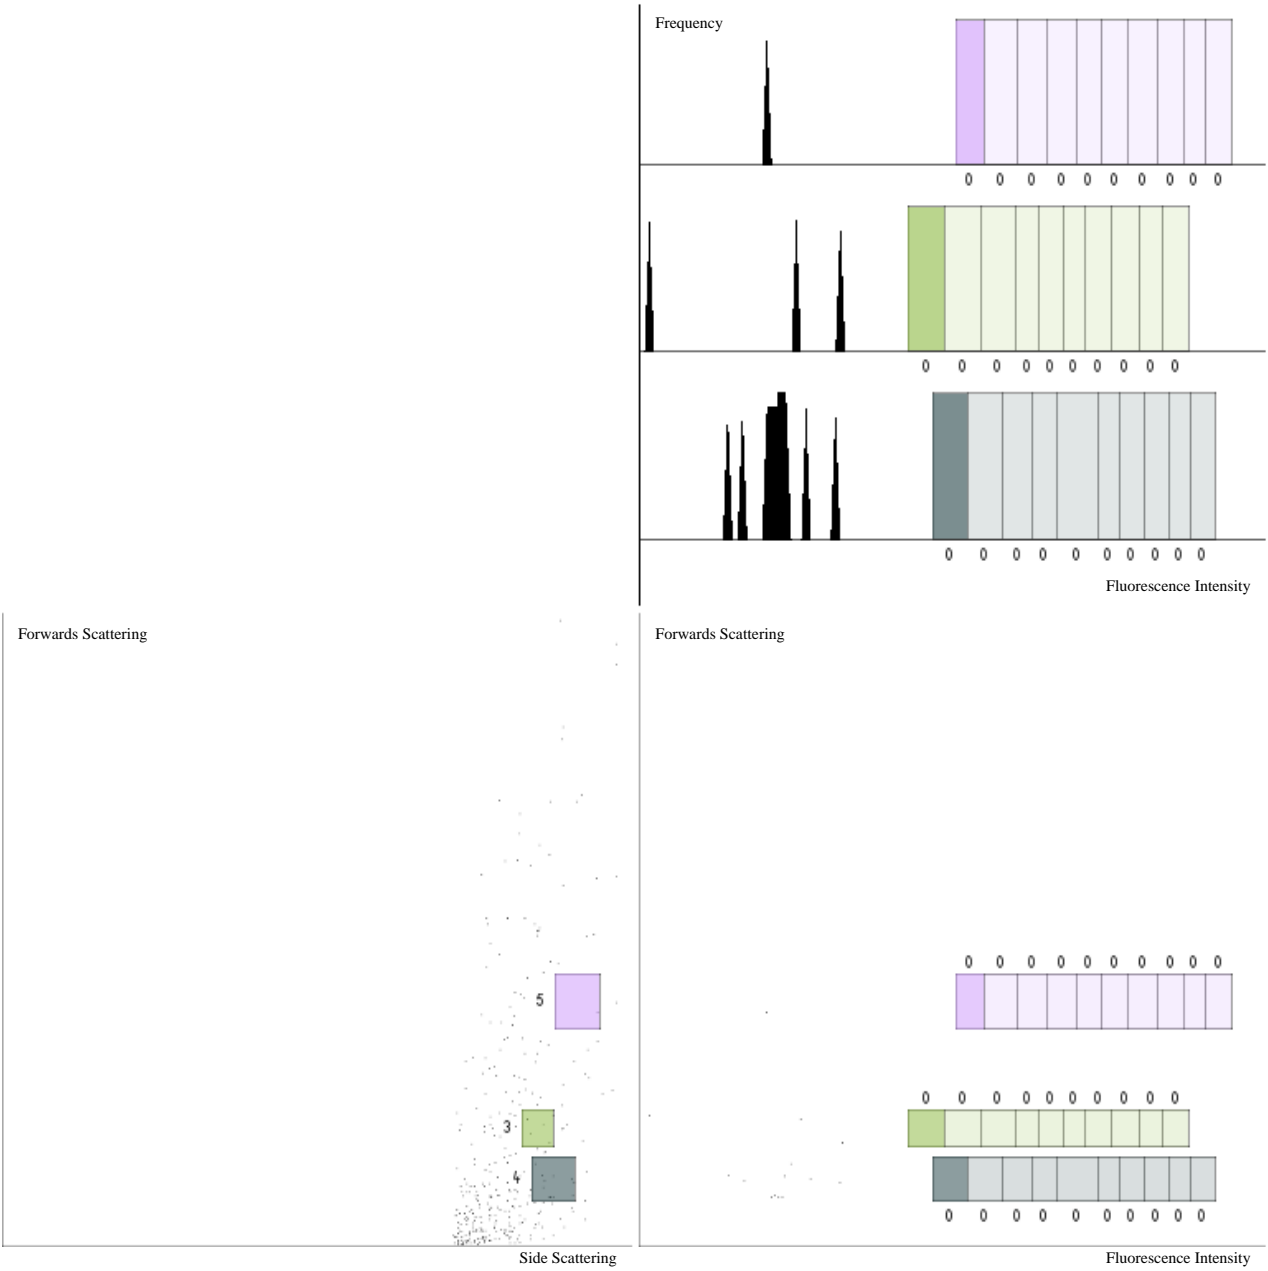

ANNEX 3: TAG DECONVOLUTION - BEAD 517

Passes flow sorting criteria: Yes  
Passes tag deconvolution criteria: Yes  
Included in protocol analysis: Yes  
Protocol: 7, 9, 2, 9  
Filename: Bin9\_plateA0\_H9.fcs  
Split 1: Petrol shading  
Split 2: Green shading  
Split 3: Violet shading

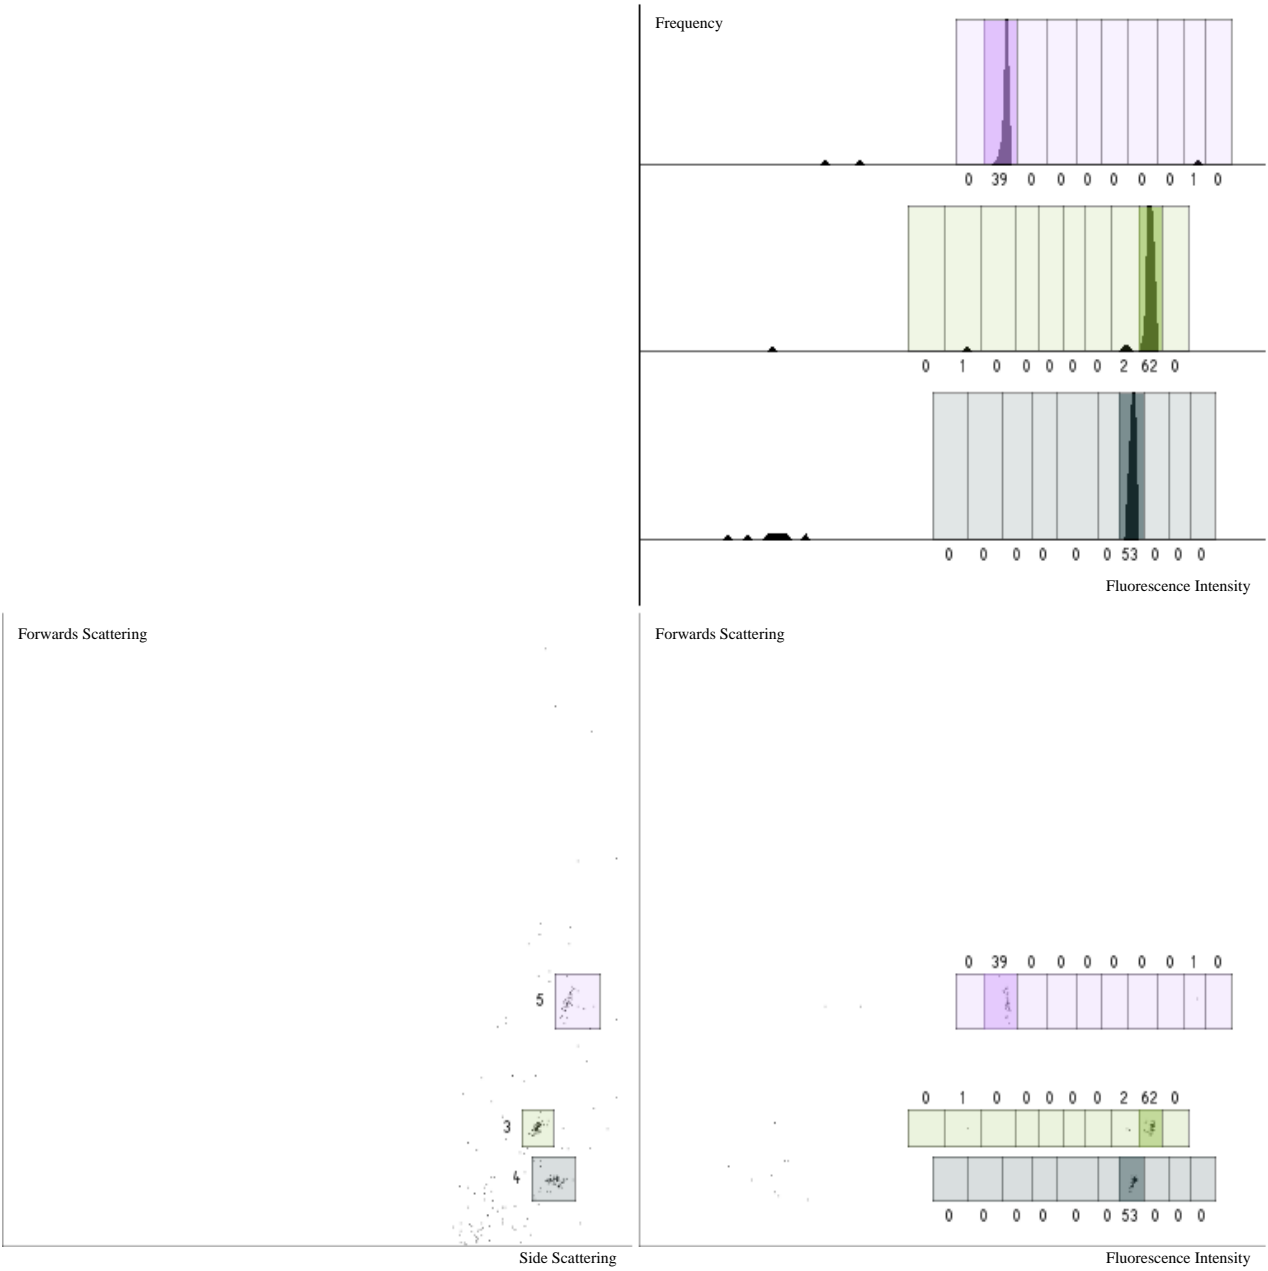

ANNEX 3: TAG DECONVOLUTION - BEAD 518

Passes flow sorting criteria: Yes  
Passes tag deconvolution criteria: Yes  
Included in protocol analysis: Yes  
Protocol: 3, 7, 2, 9  
Filename: Bin9\_plateA0\_H10.fcs  
Split 1: Petrol shading  
Split 2: Green shading  
Split 3: Violet shading

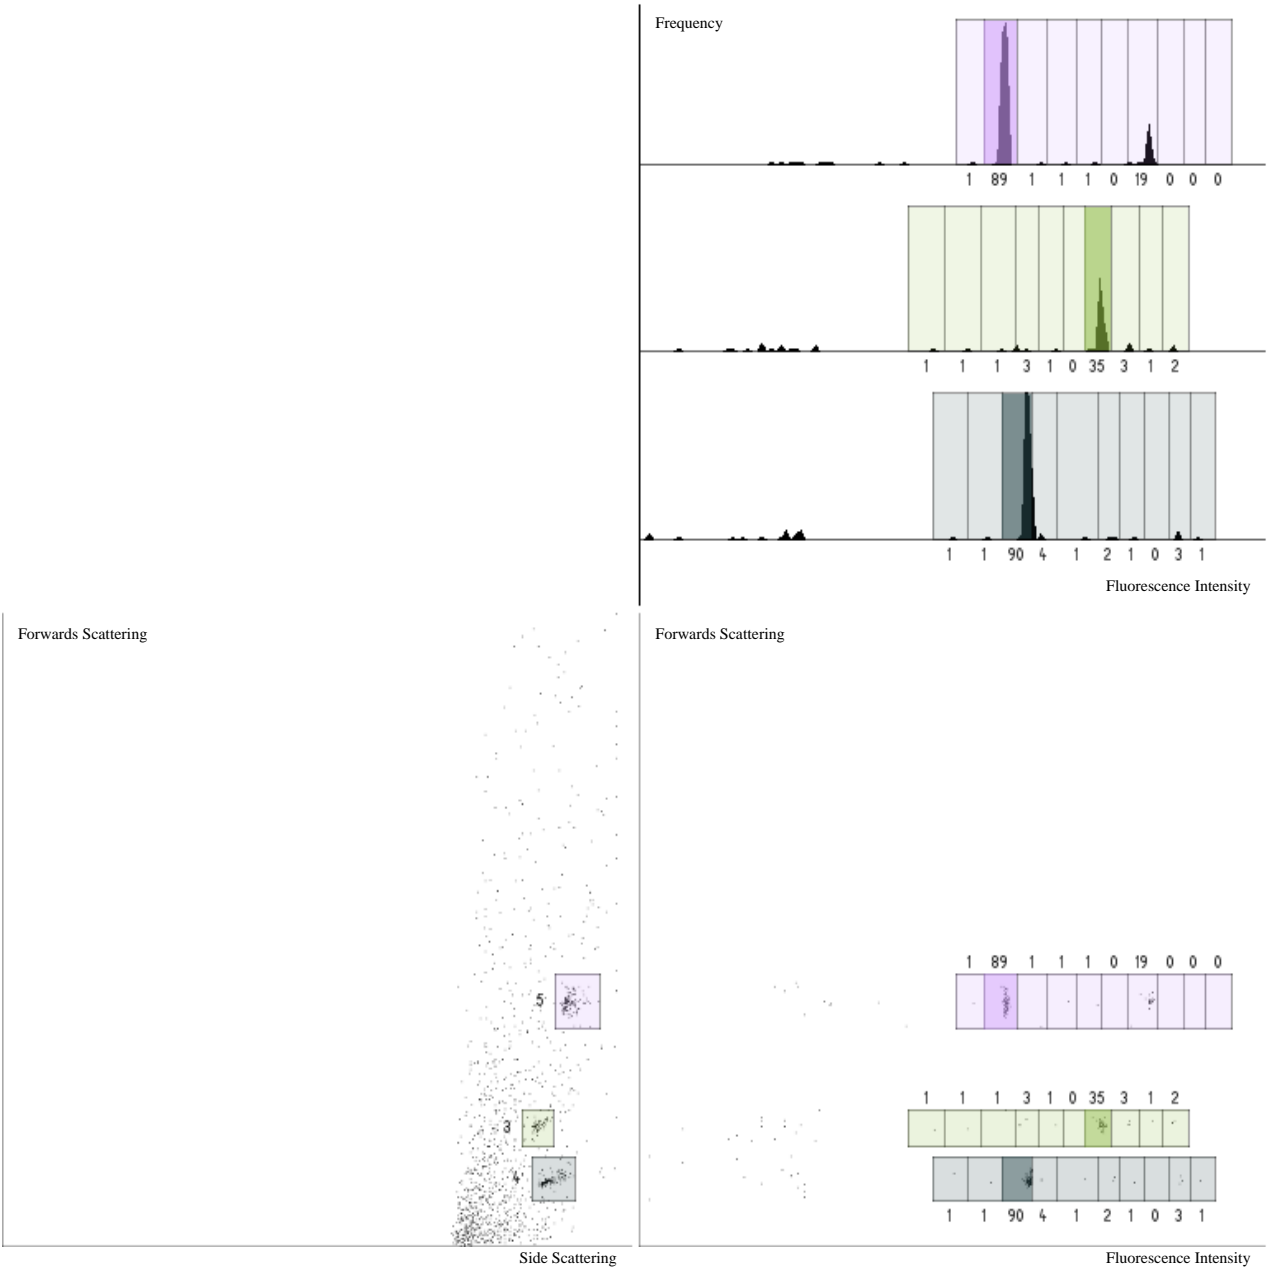



ANNEX 3: TAG DECONVOLUTION - BEAD 519

Passes flow sorting criteria: Yes  
Passes tag deconvolution criteria: No  
Included in protocol analysis: No  
Protocol: N/A  
Filename: Bin9\_plateA0\_H11.fcs  
Split 1: Petrol shading  
Split 2: Green shading  
Split 3: Violet shading

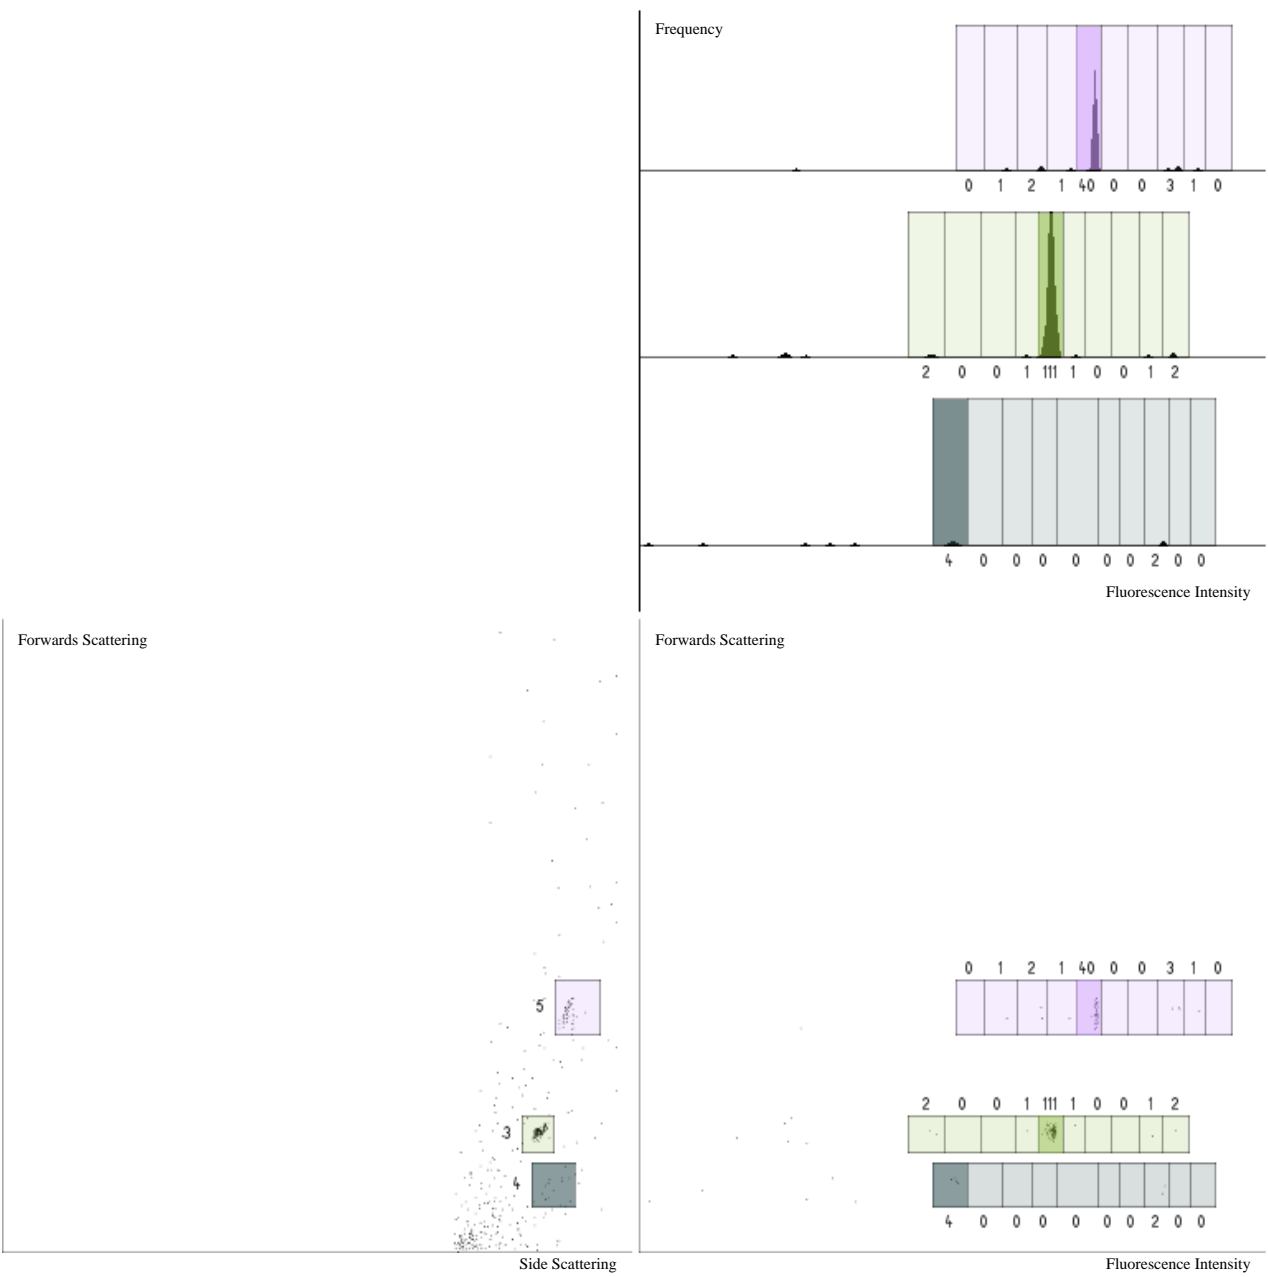

ANNEX 3: TAG DECONVOLUTION - BEAD 520

Passes flow sorting criteria: Yes  
Passes tag deconvolution criteria: Yes  
Included in protocol analysis: Yes  
Protocol: 3, 9, 2, 10  
Filename: Bin10\_plateA1\_D12.fcs  
Split 1: Petrol shading  
Split 2: Green shading  
Split 3: Violet shading

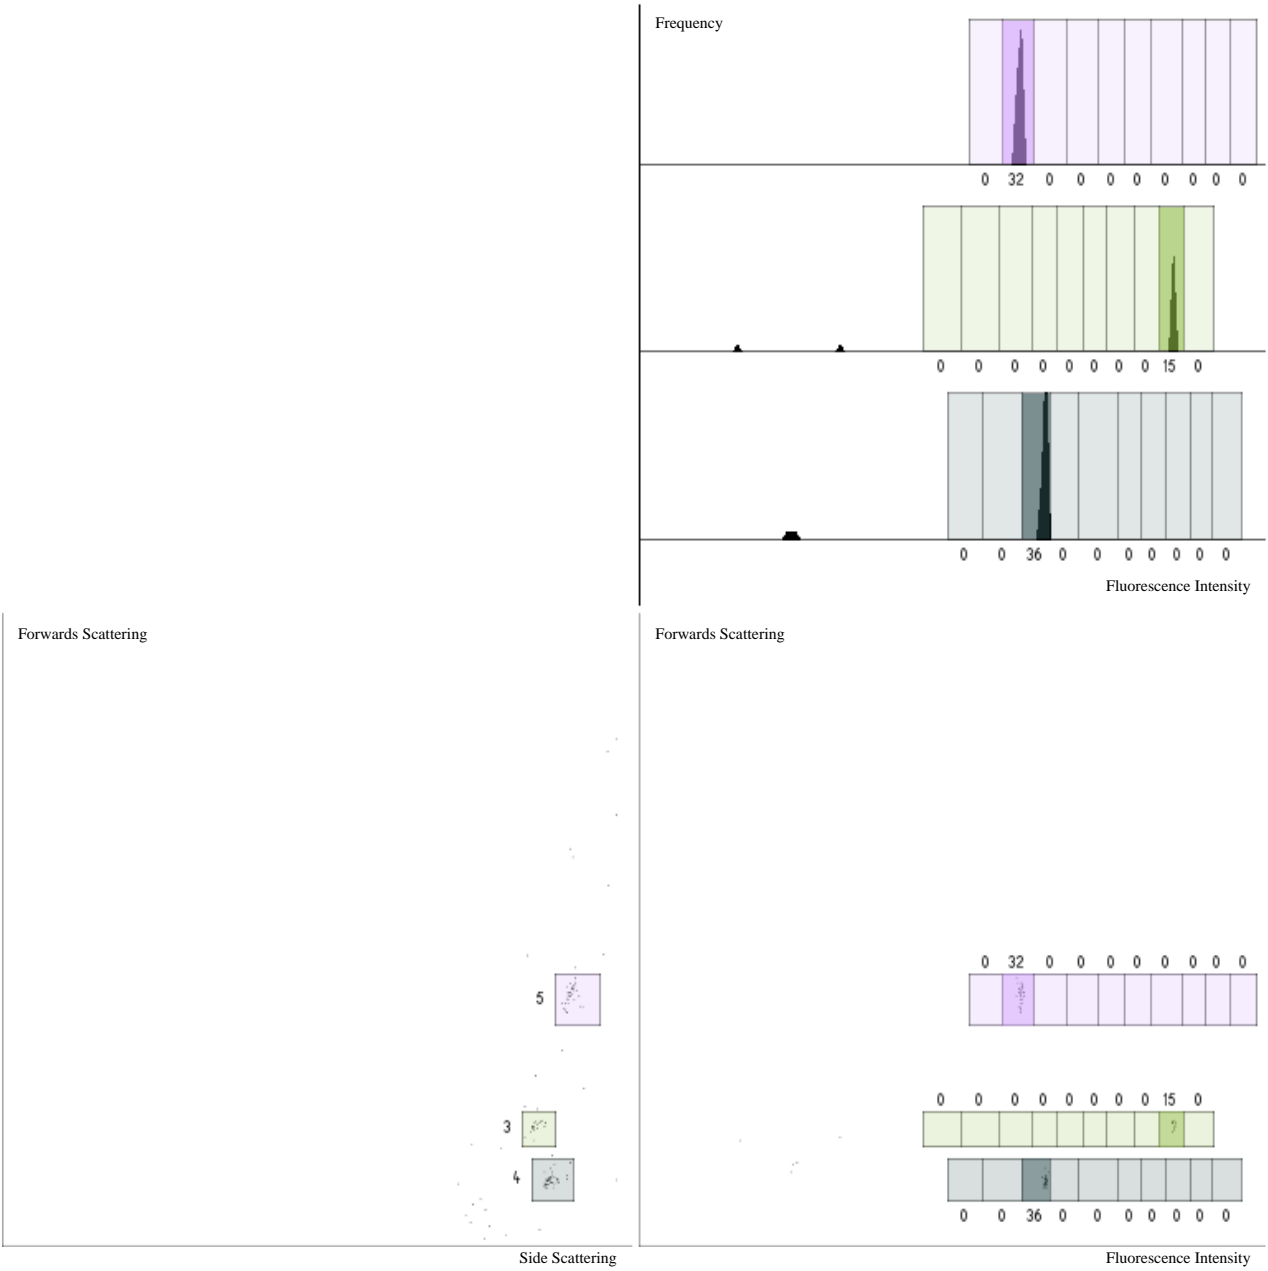

ANNEX 3: TAG DECONVOLUTION - BEAD 521

Passes flow sorting criteria: Yes  
Passes tag deconvolution criteria: Yes  
Included in protocol analysis: Yes  
Protocol: 1, 1, 10, 9  
Filename: Bin9\_plateB1\_A1.fcs  
Split 1: Petrol shading  
Split 2: Green shading  
Split 3: Violet shading

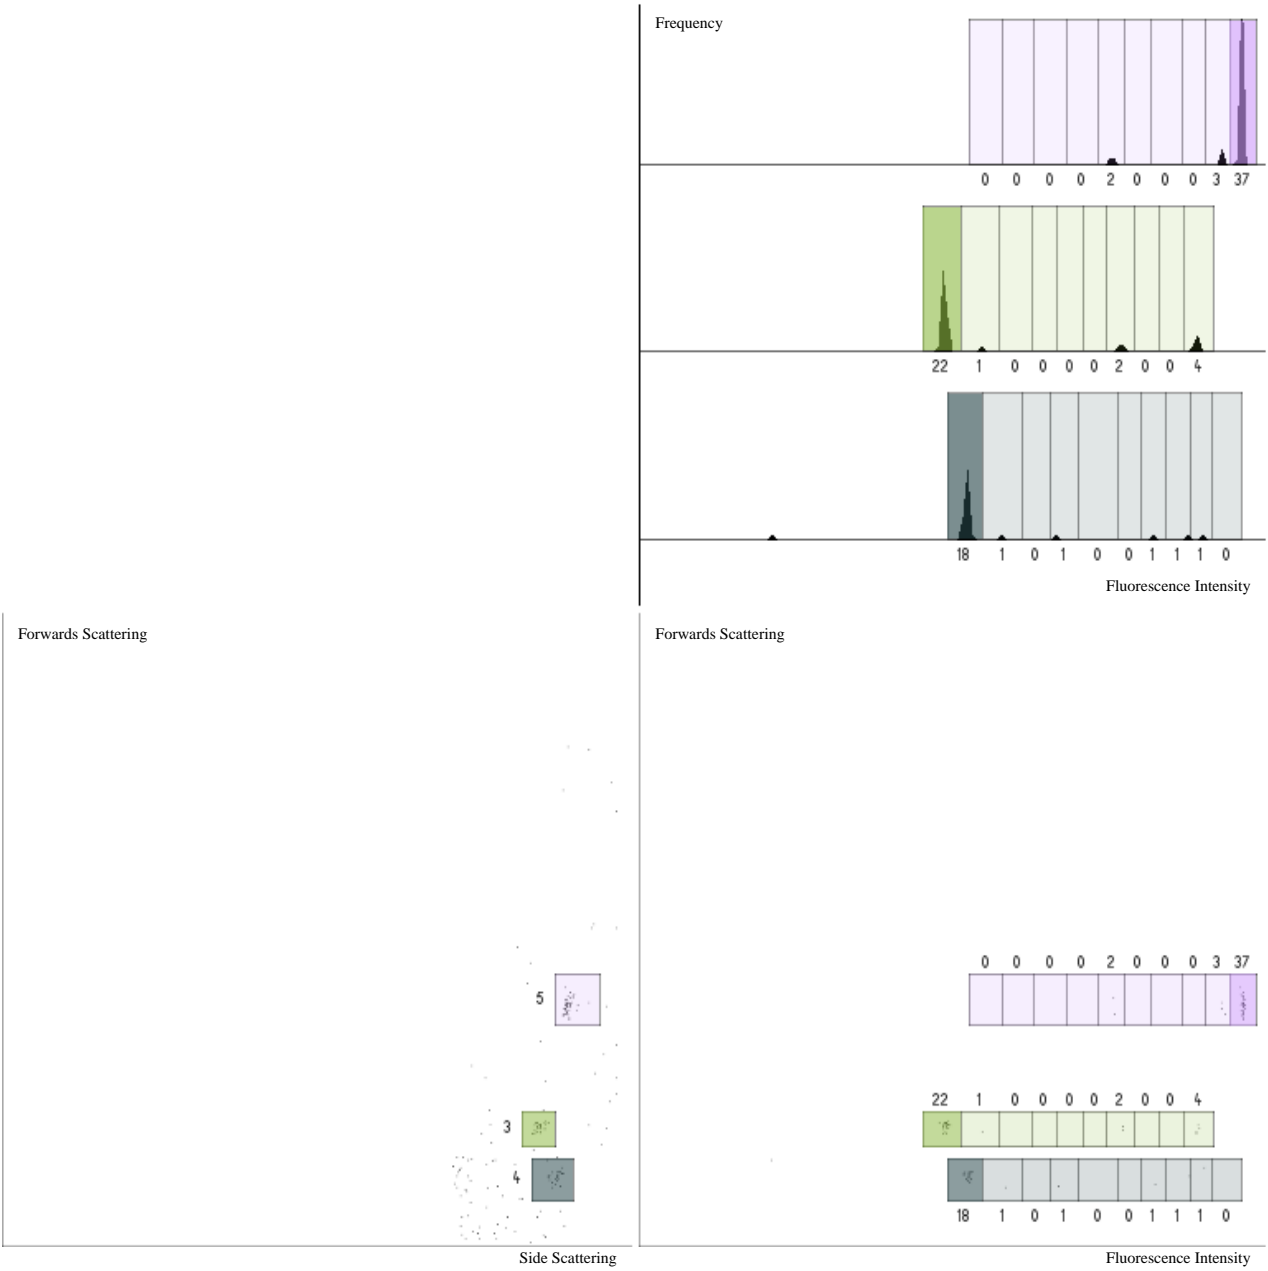

ANNEX 3: TAG DECONVOLUTION - BEAD 522

Passes flow sorting criteria: Yes  
Passes tag deconvolution criteria: No  
Included in protocol analysis: No  
Protocol: N/A  
Filename: Bin9\_plateB1\_A2.fcs  
Split 1: Petrol shading  
Split 2: Green shading  
Split 3: Violet shading

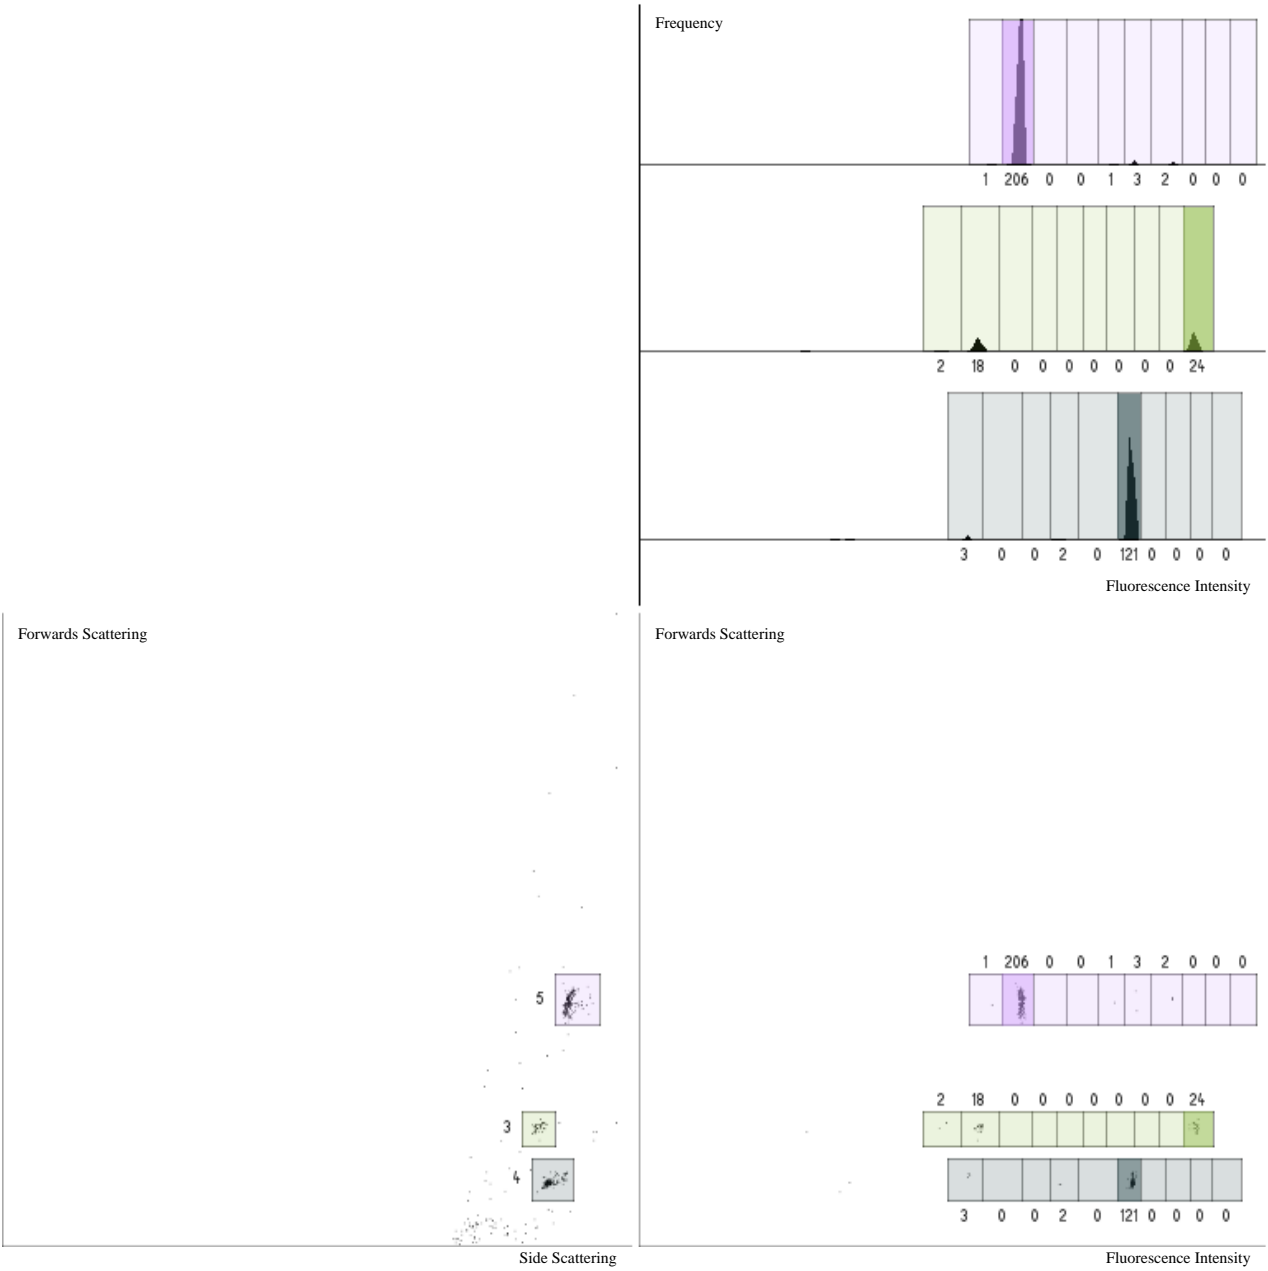

ANNEX 3: TAG DECONVOLUTION - BEAD 523

Passes flow sorting criteria: Yes  
Passes tag deconvolution criteria: Yes  
Included in protocol analysis: Yes  
Protocol: 4, 6, 4, 9  
Filename: Bin9\_plateB1\_A6.fcs  
Split 1: Petrol shading  
Split 2: Green shading  
Split 3: Violet shading

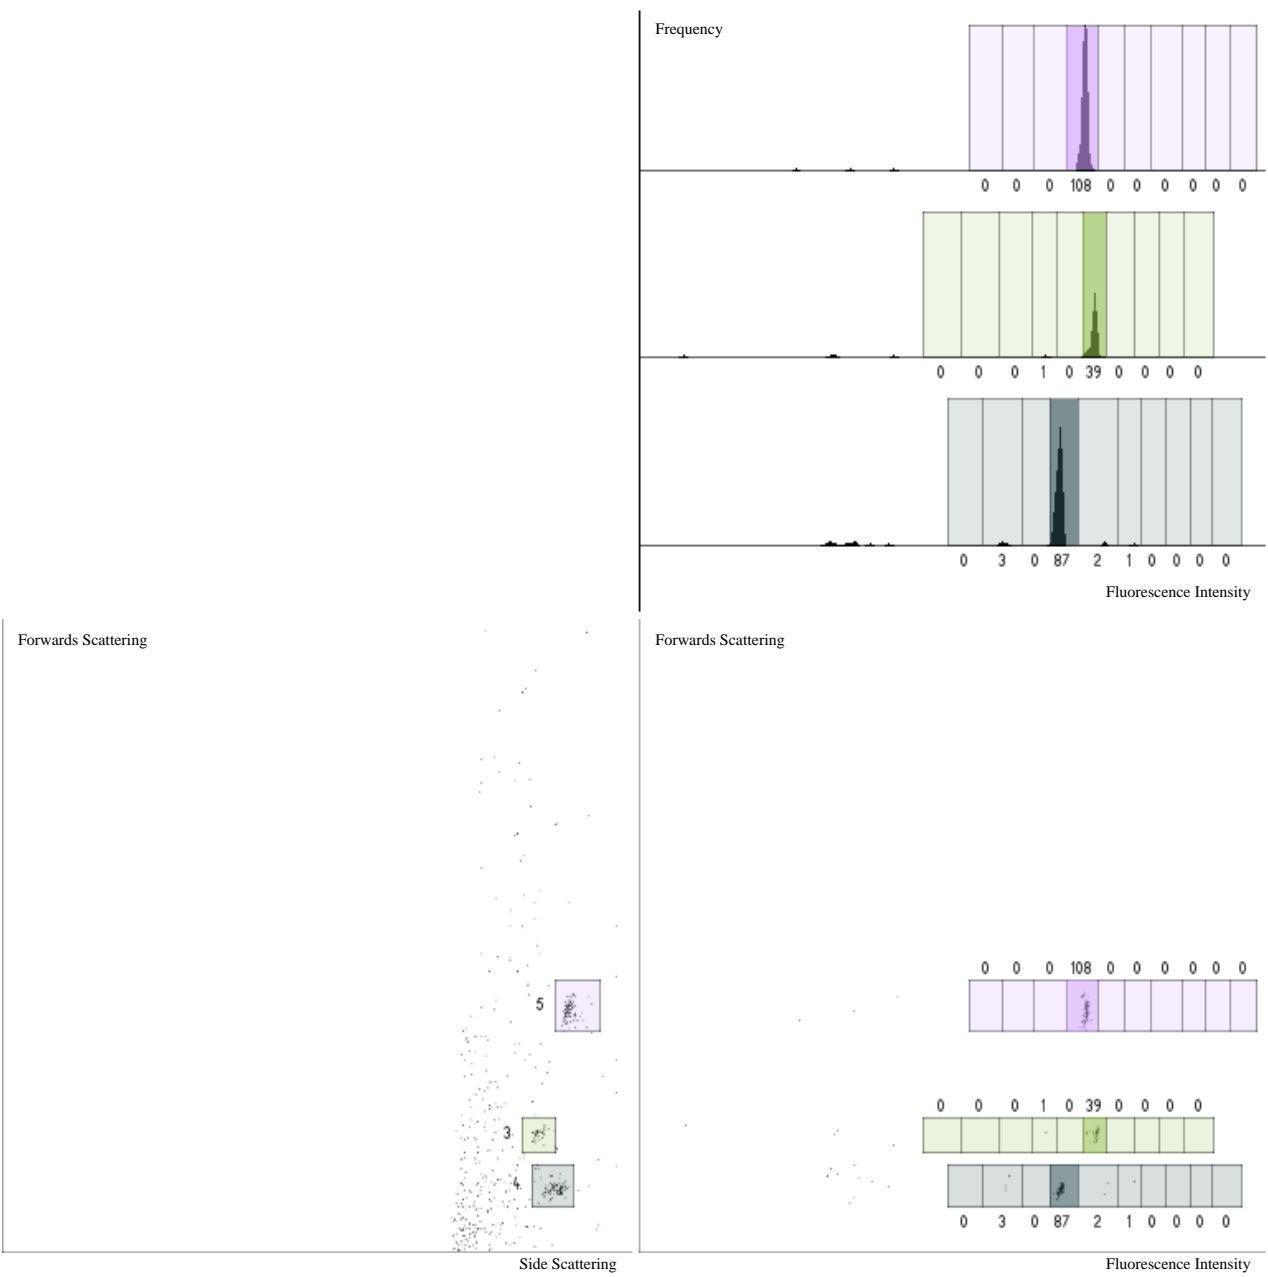

ANNEX 3: TAG DECONVOLUTION - BEAD 524

Passes flow sorting criteria: Yes  
Passes tag deconvolution criteria: Yes  
Included in protocol analysis: Yes  
Protocol: 8, 10, 3, 9  
Filename: Bin9\_plateB1\_A7.fcs  
Split 1: Petrol shading  
Split 2: Green shading  
Split 3: Violet shading

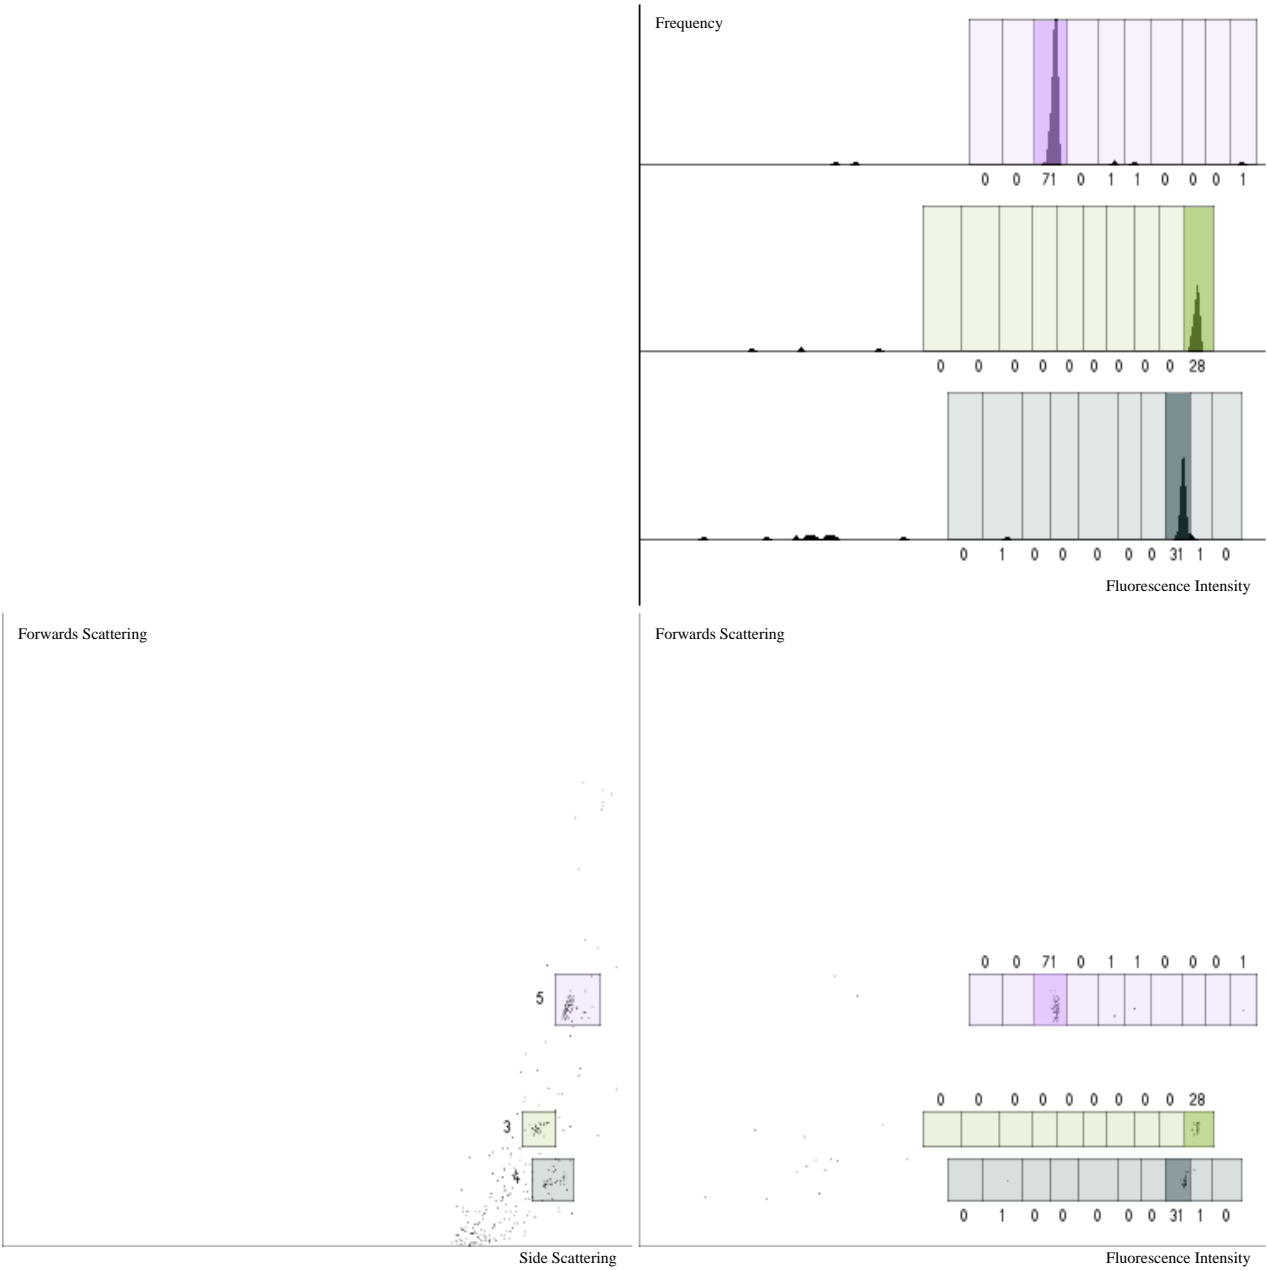

ANNEX 3: TAG DECONVOLUTION - BEAD 525

Passes flow sorting criteria: Yes  
Passes tag deconvolution criteria: No  
Included in protocol analysis: No  
Protocol: N/A  
Filename: Bin9\_plateB1\_A8.fcs  
Split 1: Petrol shading  
Split 2: Green shading  
Split 3: Violet shading

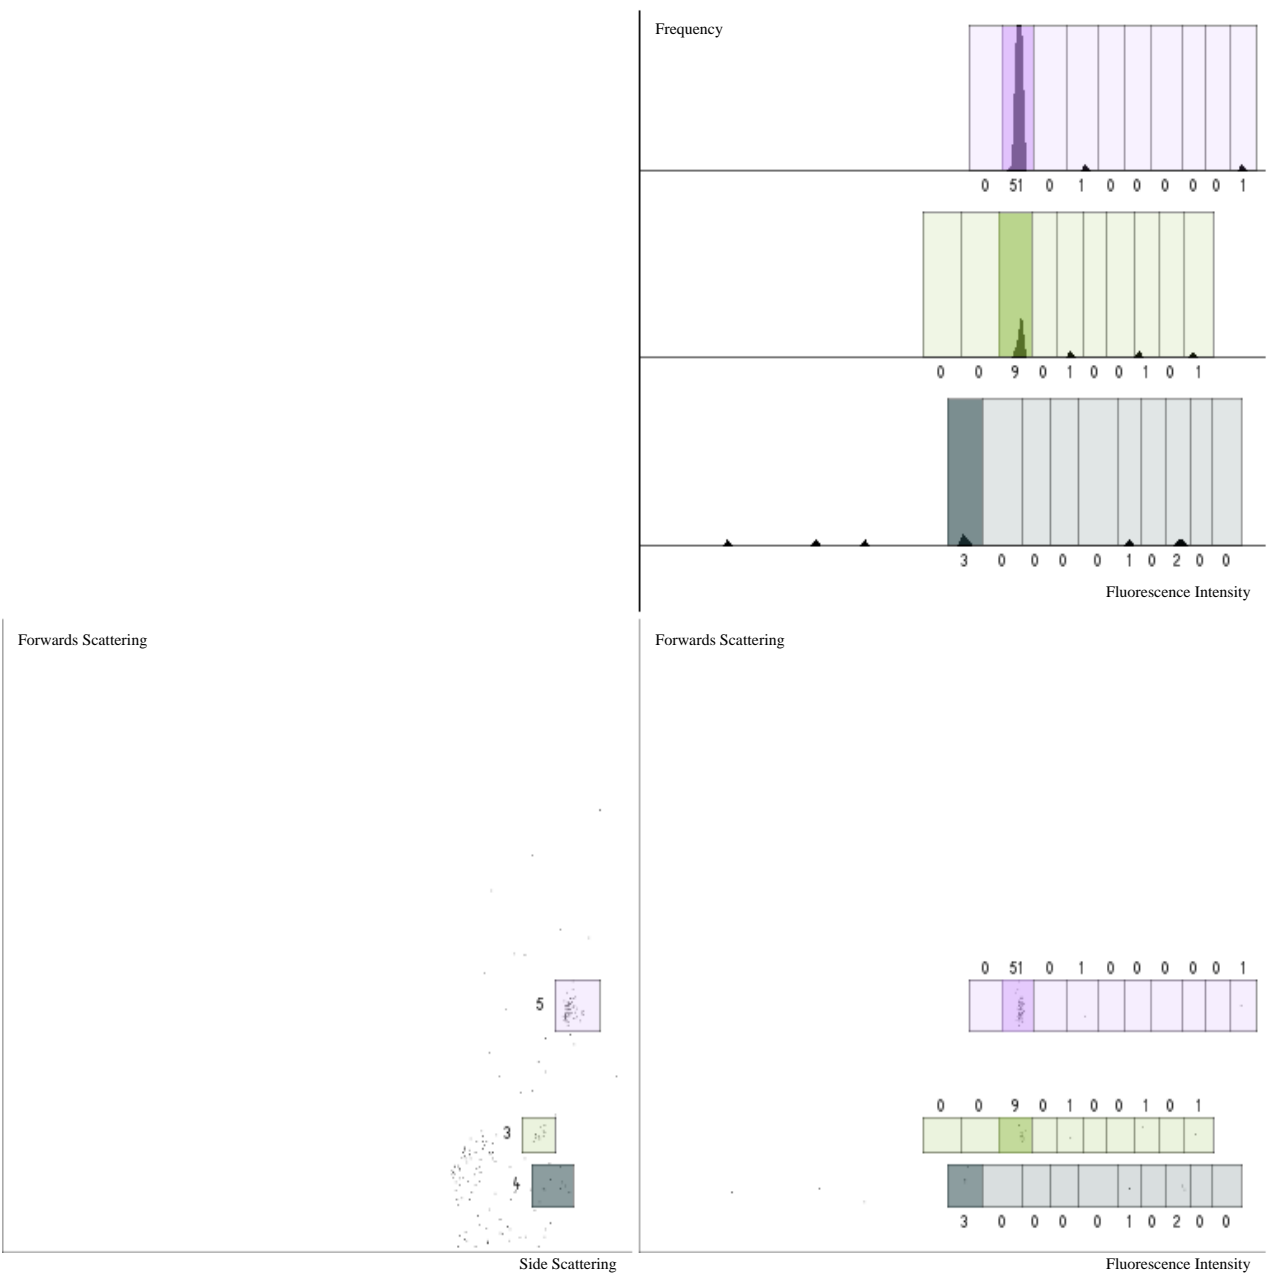

ANNEX 3: TAG DECONVOLUTION - BEAD 526

Passes flow sorting criteria: Yes  
Passes tag deconvolution criteria: No  
Included in protocol analysis: No  
Protocol: N/A  
Filename: Bin10\_plateA1\_C1.fcs  
Split 1: Petrol shading  
Split 2: Green shading  
Split 3: Violet shading

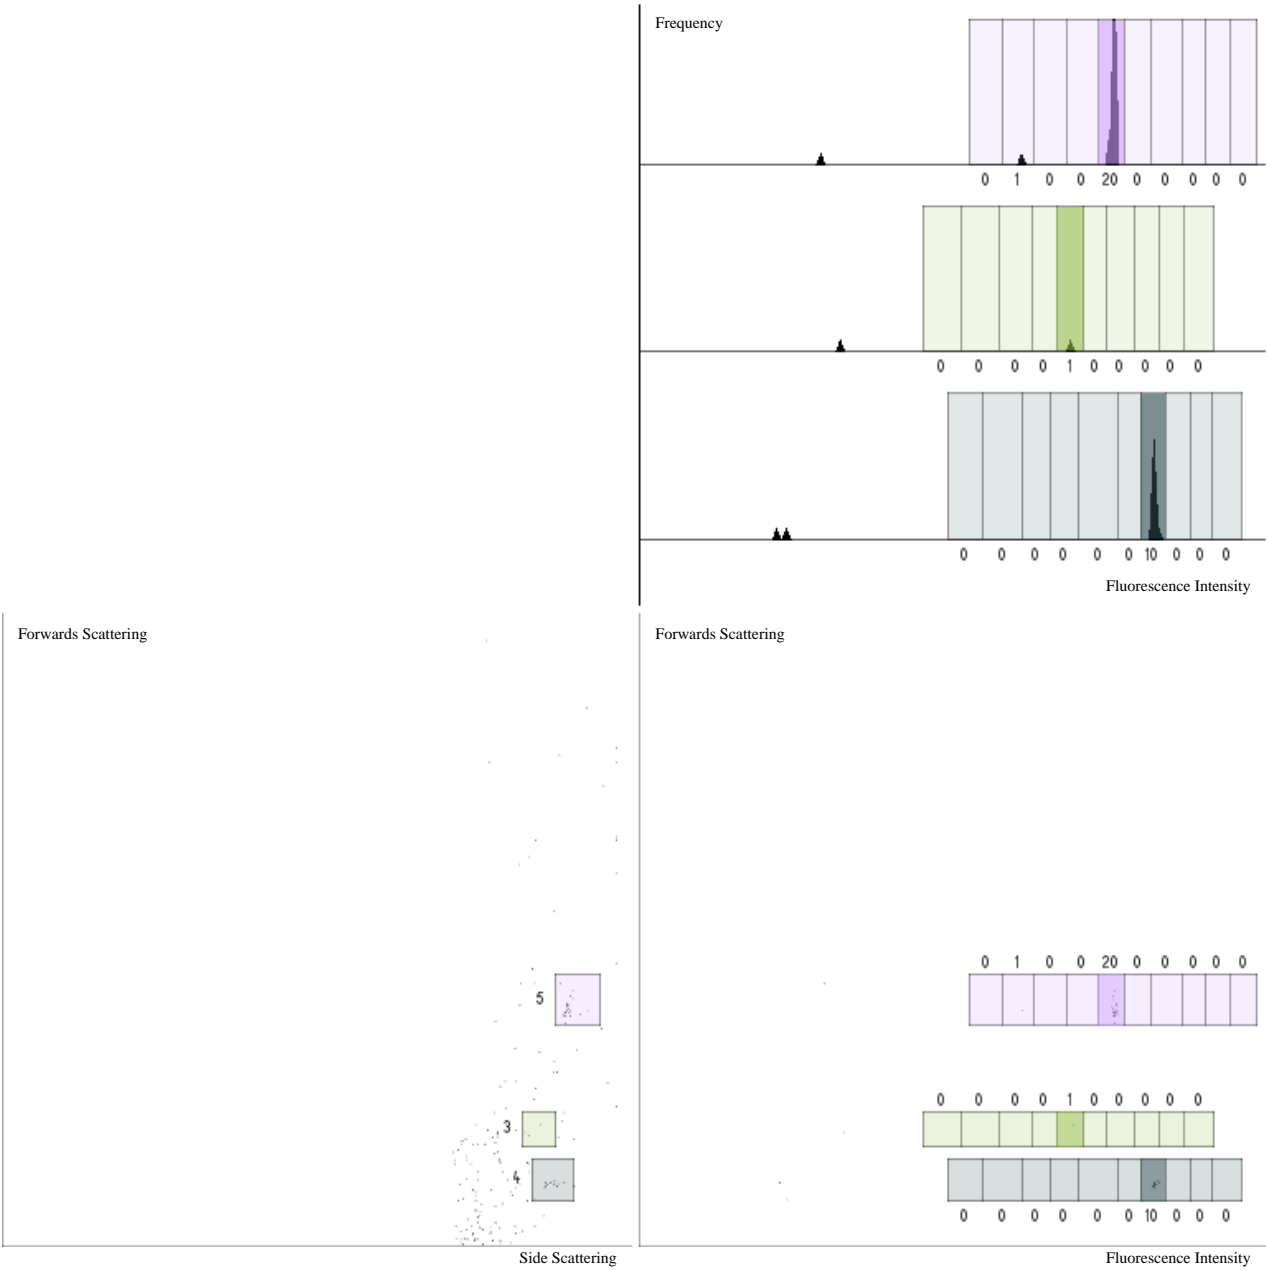



ANNEX 3: TAG DECONVOLUTION - BEAD 527

Passes flow sorting criteria: Yes  
Passes tag deconvolution criteria: Yes  
Included in protocol analysis: Yes  
Protocol: 3, 1, 8, 10  
Filename: Bin10\_plateA1\_C2.fcs  
Split 1: Petrol shading  
Split 2: Green shading  
Split 3: Violet shading

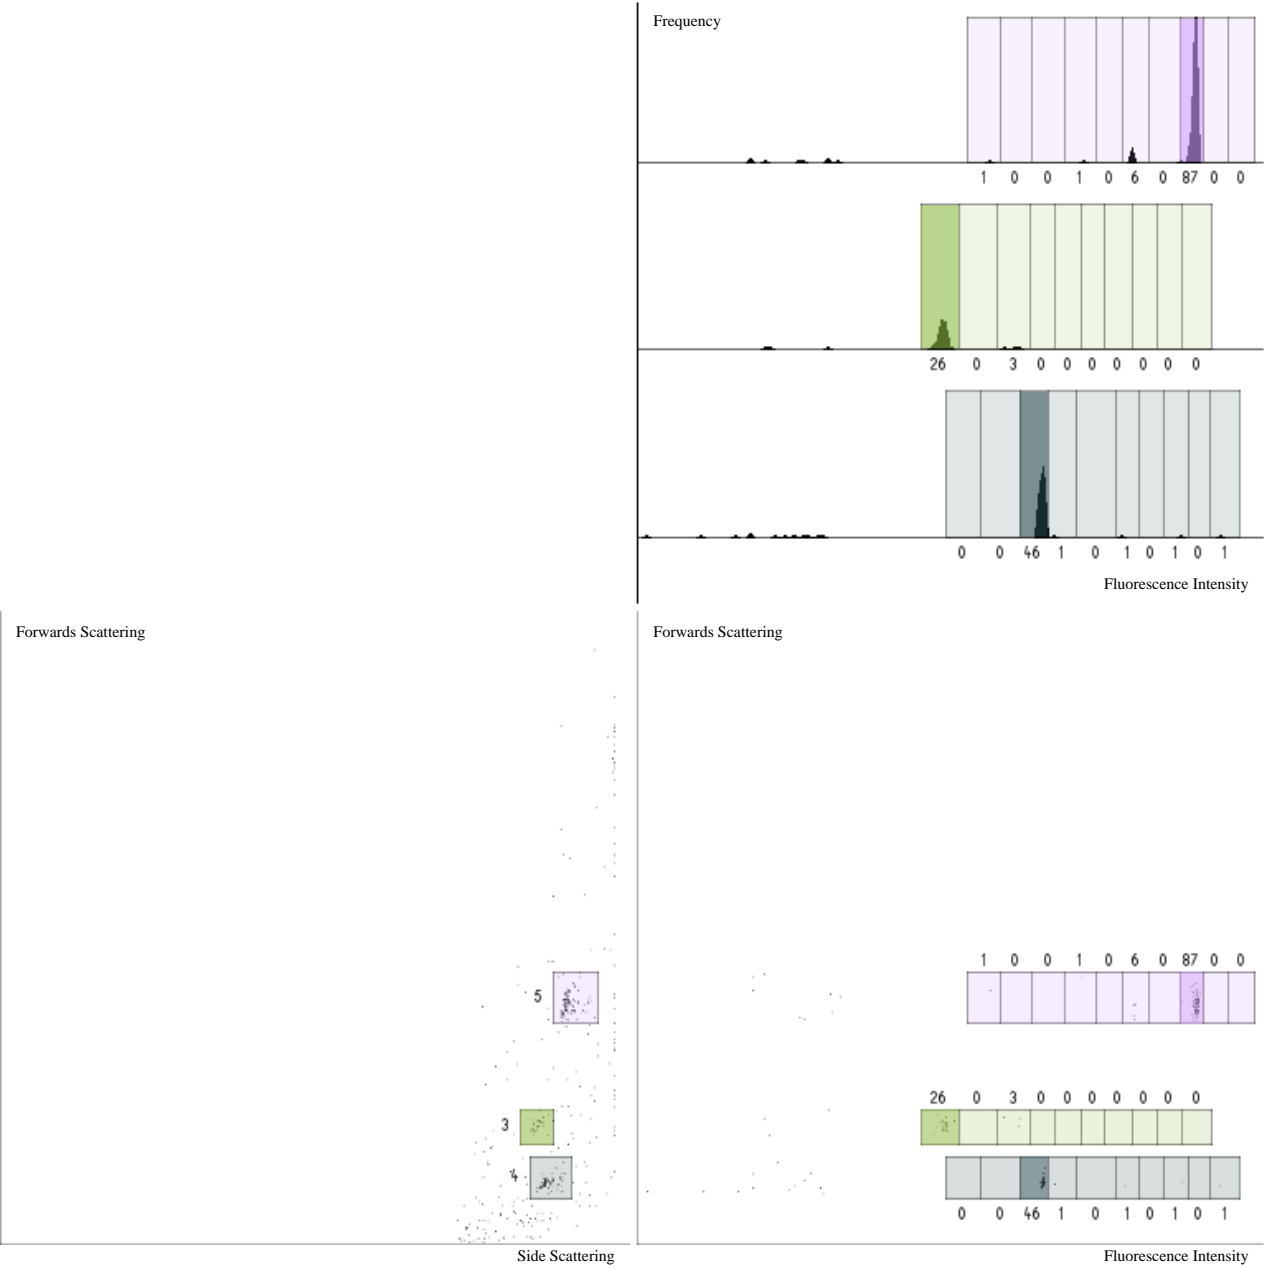

ANNEX 3: TAG DECONVOLUTION - BEAD 528

Passes flow sorting criteria: Yes  
Passes tag deconvolution criteria: Yes  
Included in protocol analysis: Yes  
Protocol: 10, 9, 1, 10  
Filename: Bin10\_plateA1\_C3.fcs  
Split 1: Petrol shading  
Split 2: Green shading  
Split 3: Violet shading

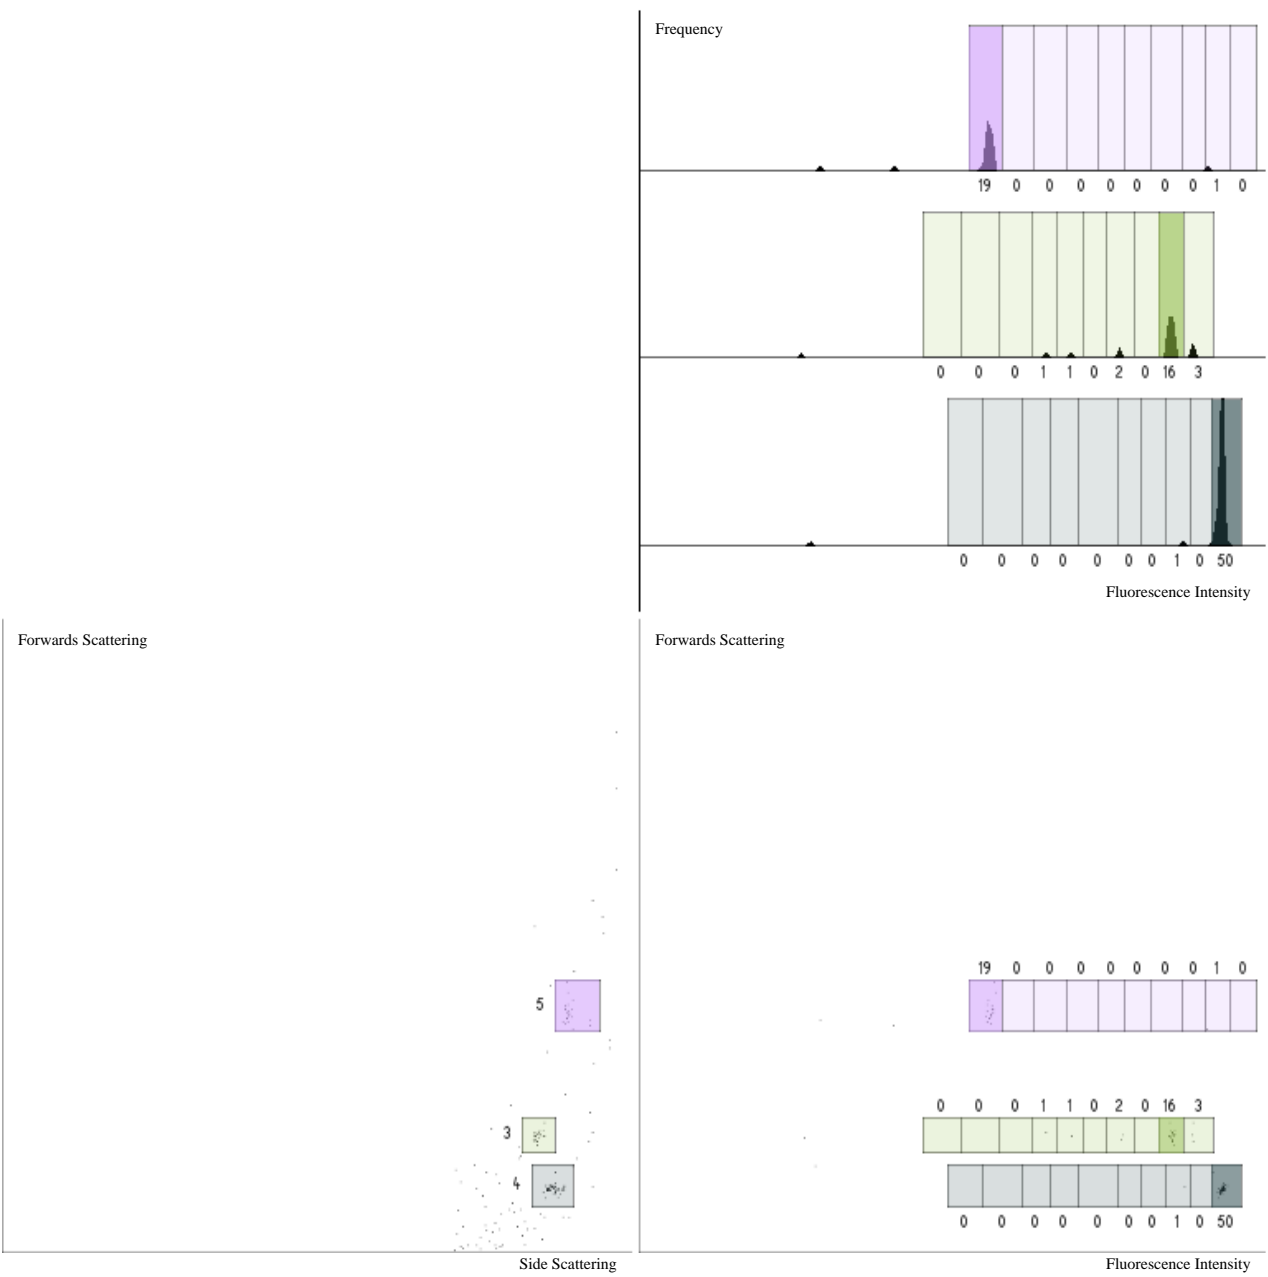

ANNEX 3: TAG DECONVOLUTION - BEAD 529

Passes flow sorting criteria: Yes  
Passes tag deconvolution criteria: Yes  
Included in protocol analysis: Yes  
Protocol: 1, 7, 7, 10  
Filename: Bin10\_plateA1\_C4.fcs  
Split 1: Petrol shading  
Split 2: Green shading  
Split 3: Violet shading

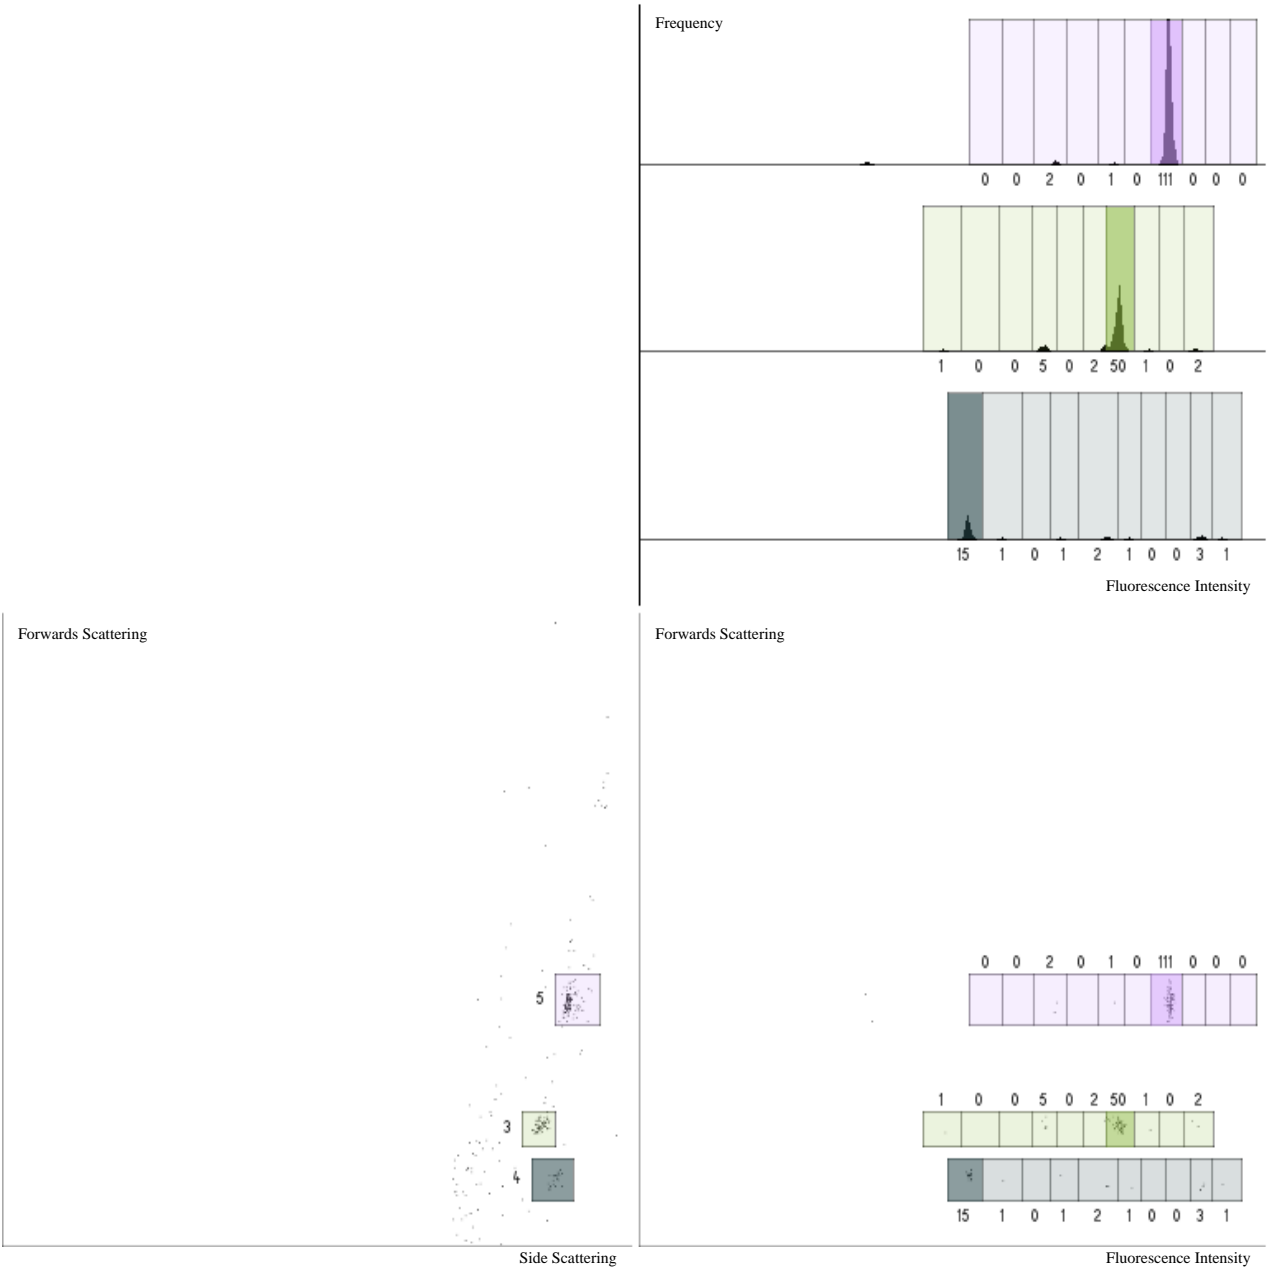

ANNEX 3: TAG DECONVOLUTION - BEAD 530

Passes flow sorting criteria: Yes  
Passes tag deconvolution criteria: Yes  
Included in protocol analysis: Yes  
Protocol: 2, 8, 4, 10  
Filename: Bin10\_plateA1\_C5.fcs  
Split 1: Petrol shading  
Split 2: Green shading  
Split 3: Violet shading

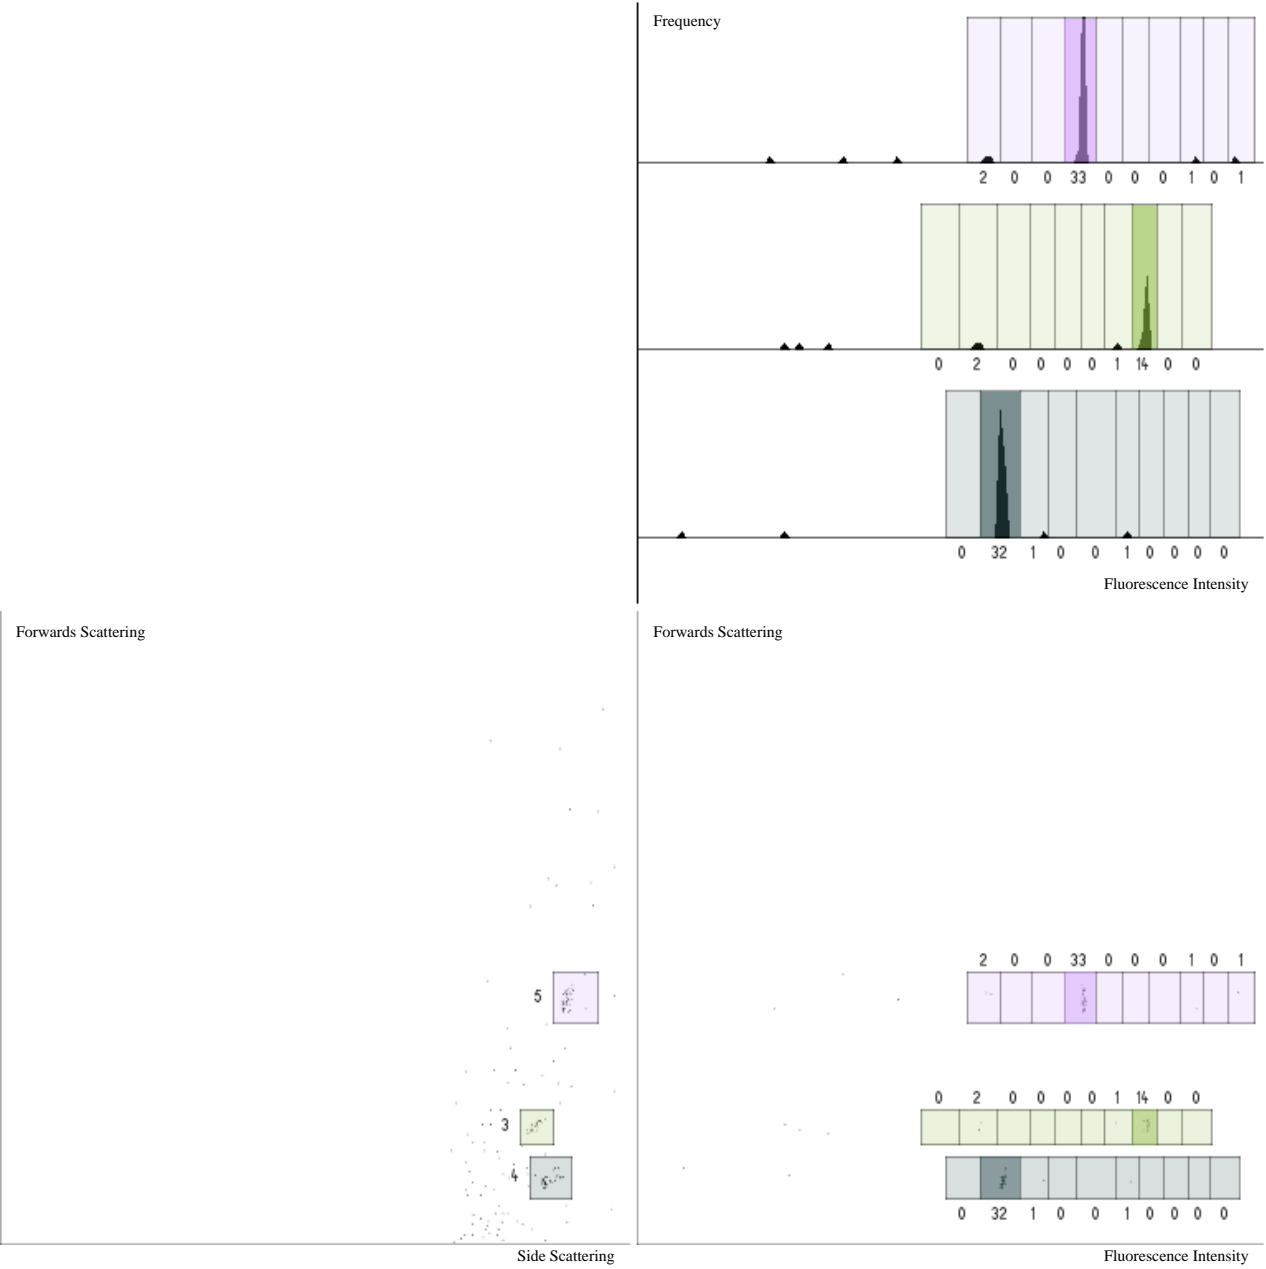

ANNEX 3: TAG DECONVOLUTION - BEAD 531

Passes flow sorting criteria: Yes  
Passes tag deconvolution criteria: No  
Included in protocol analysis: No  
Protocol: N/A  
Filename: Bin10\_plateA1\_C6.fcs  
Split 1: Petrol shading  
Split 2: Green shading  
Split 3: Violet shading

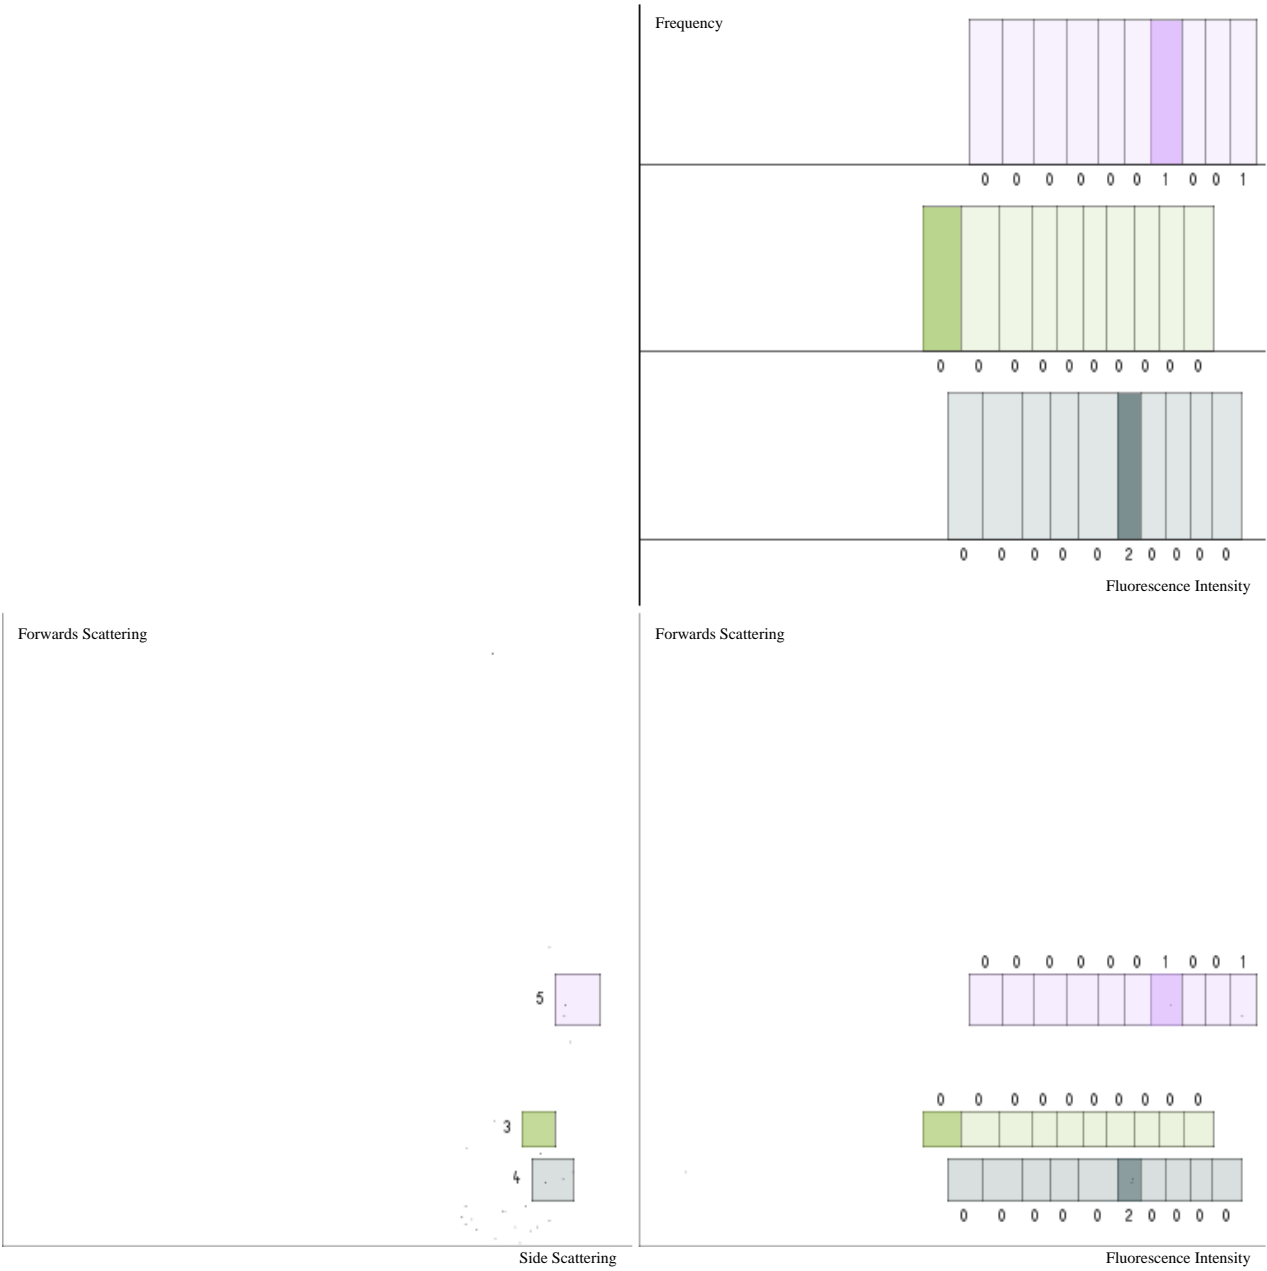

ANNEX 3: TAG DECONVOLUTION - BEAD 532

Passes flow sorting criteria: Yes  
Passes tag deconvolution criteria: Yes  
Included in protocol analysis: Yes  
Protocol: 9, 2, 8, 10  
Filename: Bin10\_plateA1\_C7.fcs  
Split 1: Petrol shading  
Split 2: Green shading  
Split 3: Violet shading

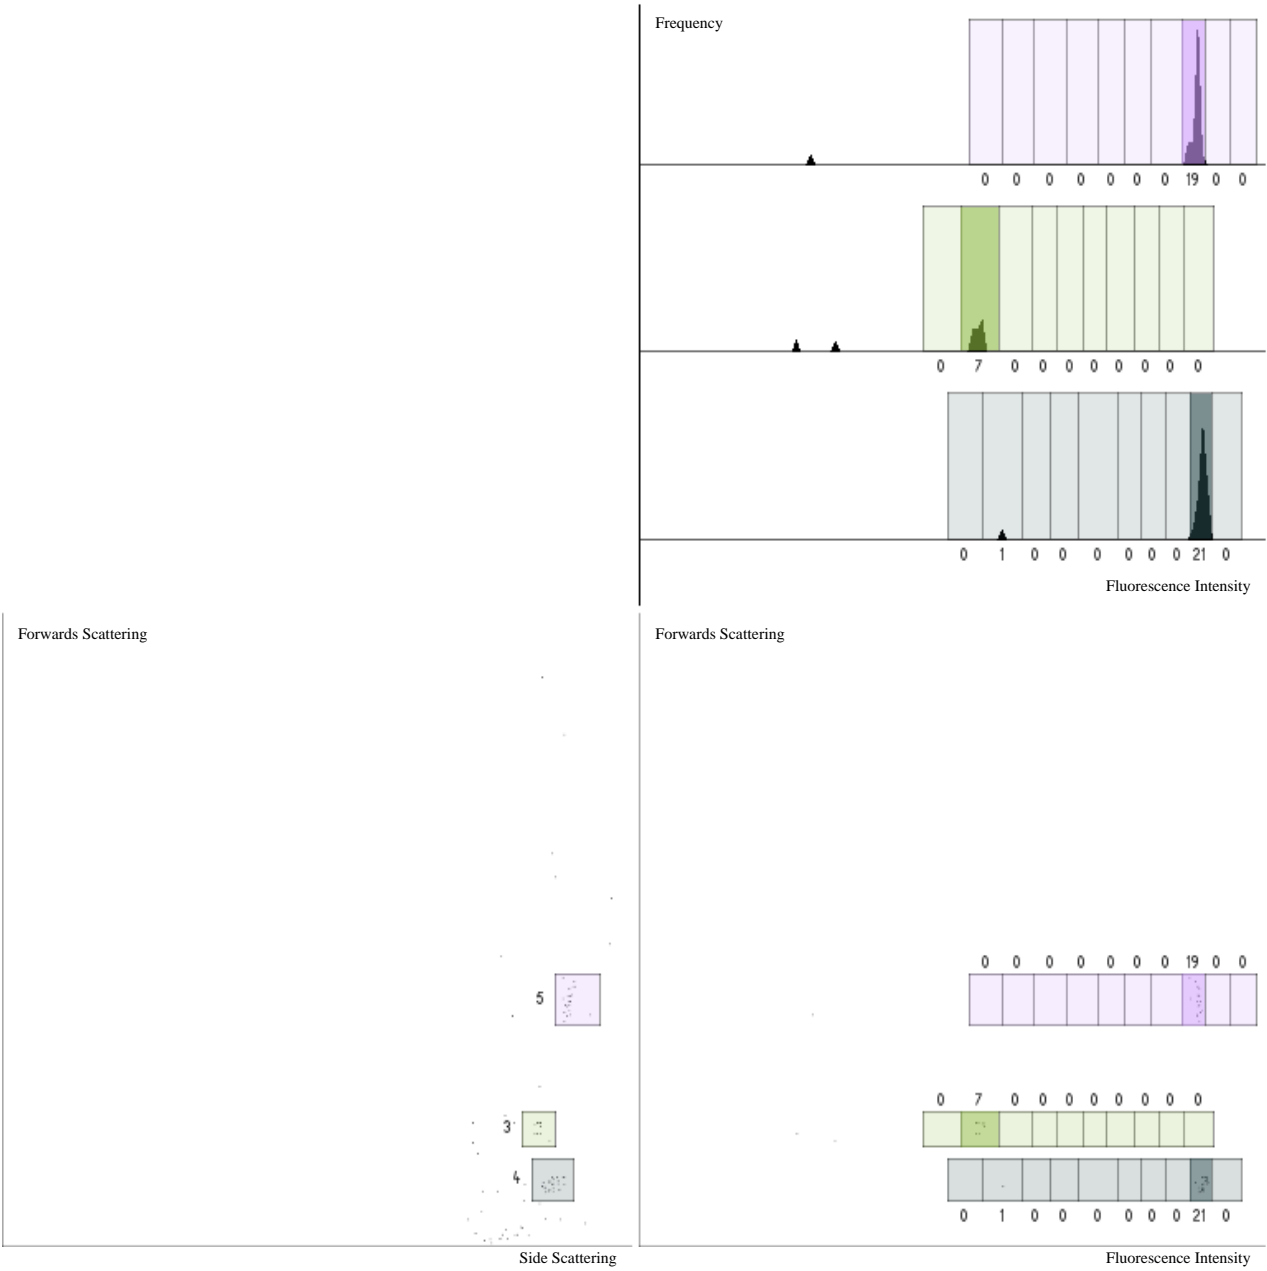

ANNEX 3: TAG DECONVOLUTION - BEAD 533

Passes flow sorting criteria: Yes  
Passes tag deconvolution criteria: No  
Included in protocol analysis: No  
Protocol: N/A  
Filename: Bin10\_plateA1\_C8.fcs  
Split 1: Petrol shading  
Split 2: Green shading  
Split 3: Violet shading

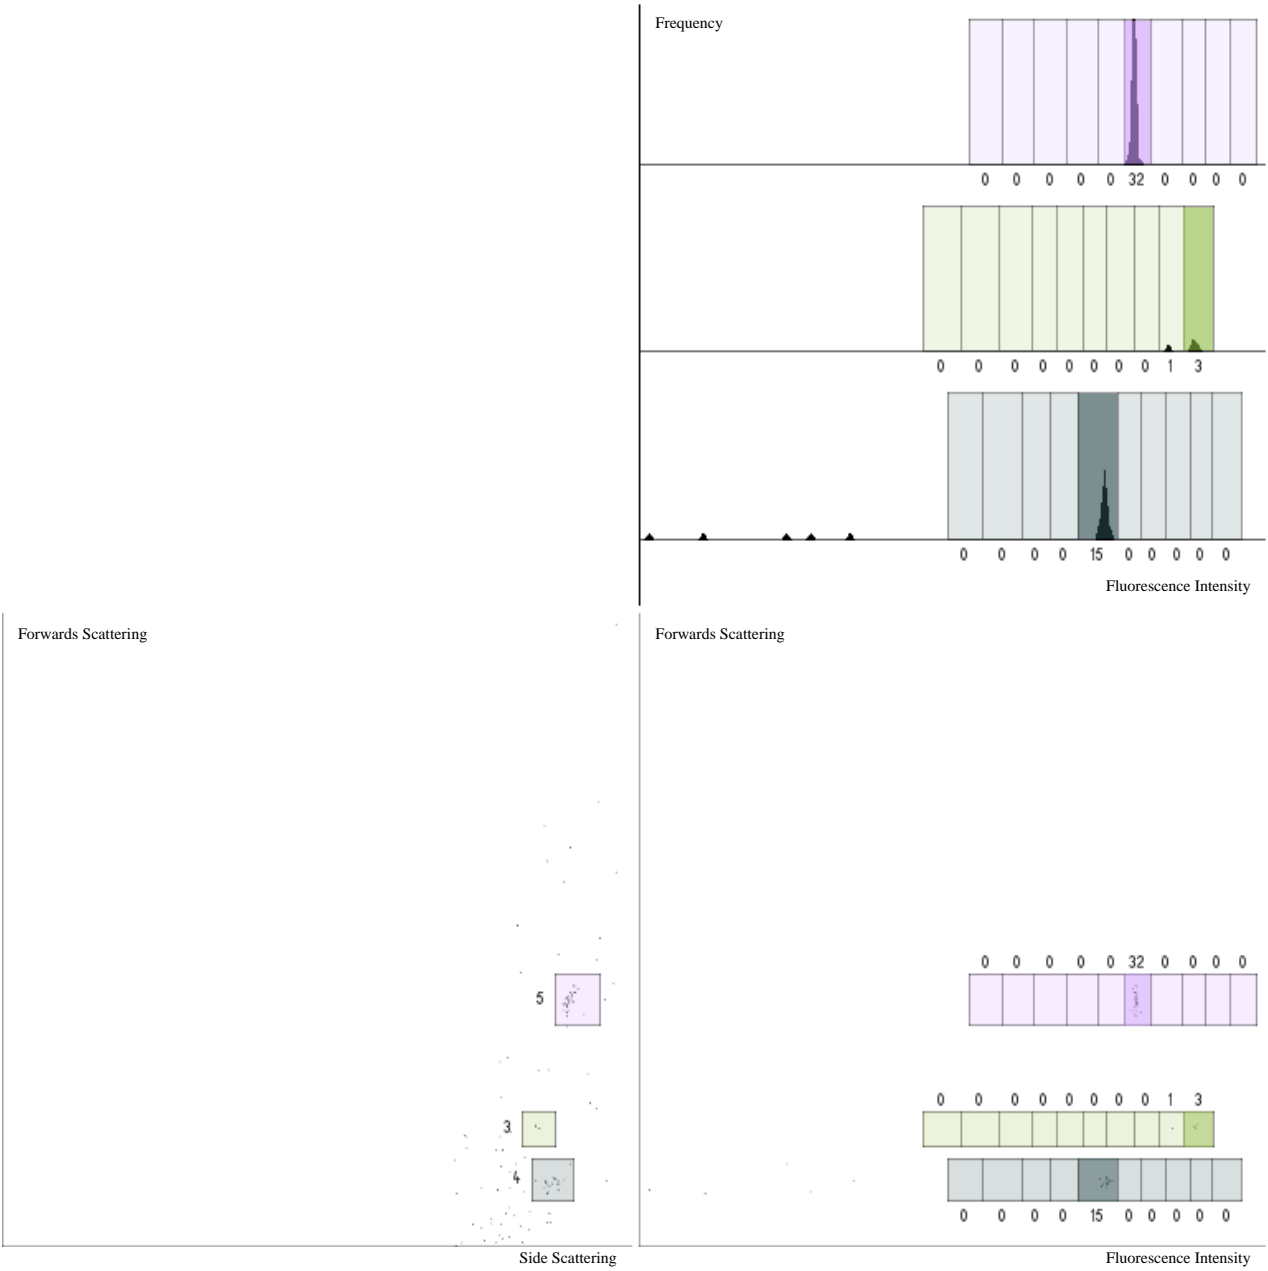

ANNEX 3: TAG DECONVOLUTION - BEAD 534

Passes flow sorting criteria: Yes  
Passes tag deconvolution criteria: No  
Included in protocol analysis: No  
Protocol: N/A  
Filename: Bin10\_plateA1\_C9.fcs  
Split 1: Petrol shading  
Split 2: Green shading  
Split 3: Violet shading

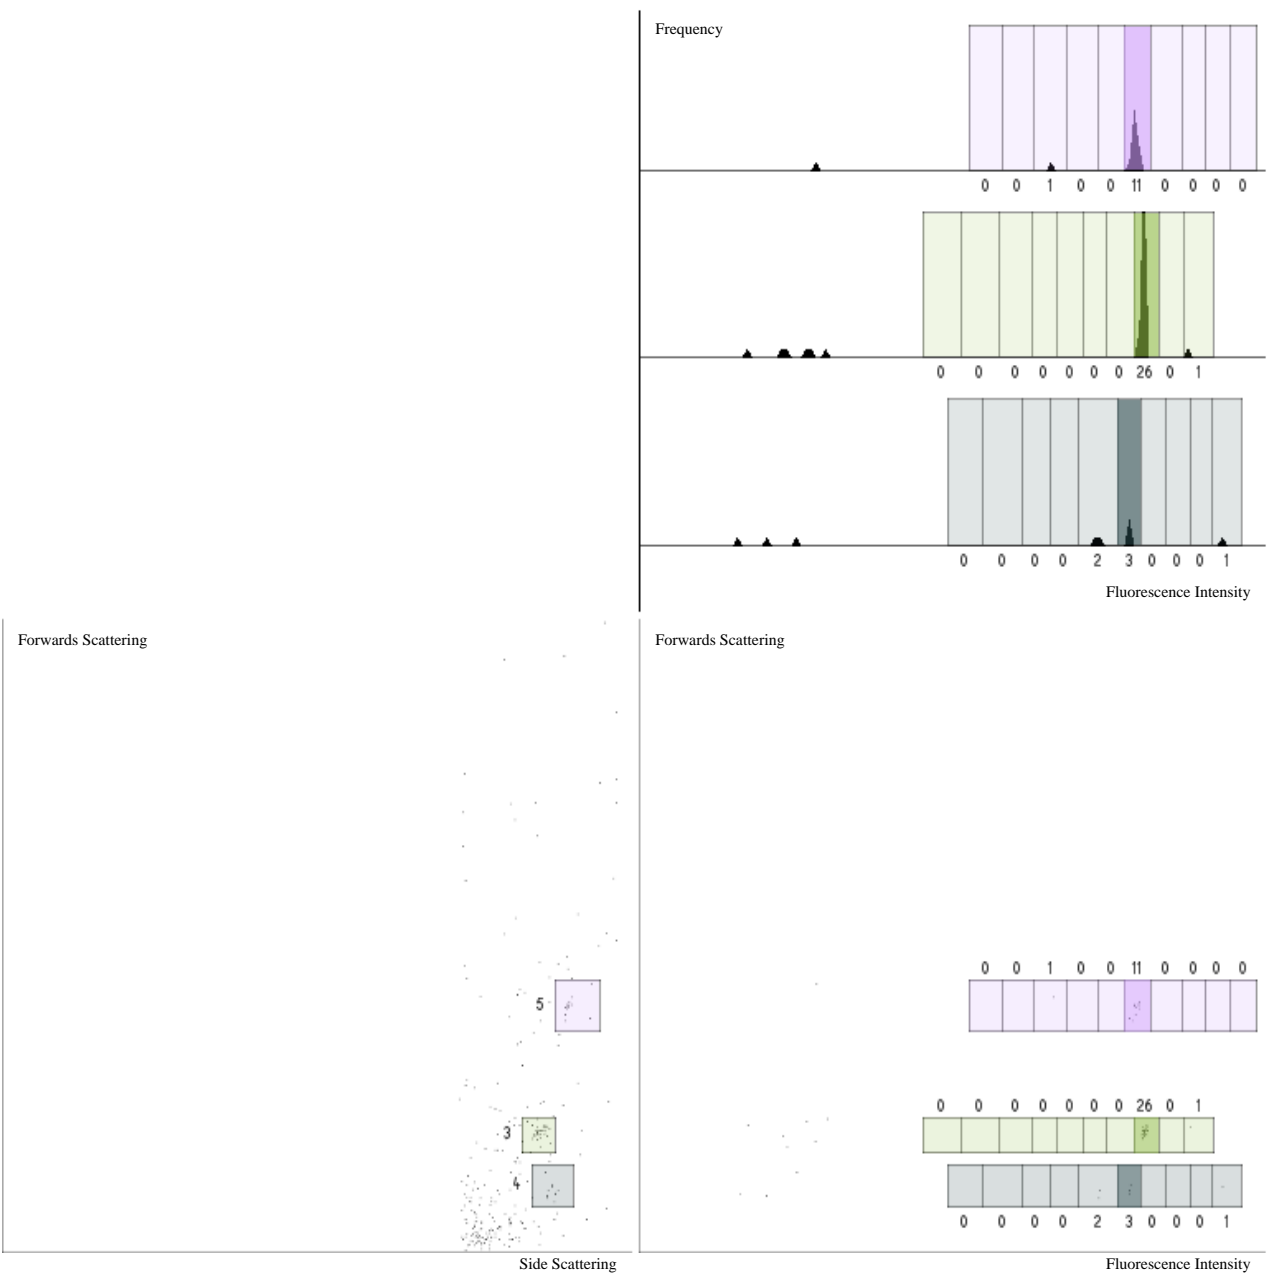



ANNEX 3: TAG DECONVOLUTION - BEAD 535

Passes flow sorting criteria: Yes  
Passes tag deconvolution criteria: No  
Included in protocol analysis: No  
Protocol: N/A  
Filename: Bin10\_plateA1\_C10.fcs  
Split 1: Petrol shading  
Split 2: Green shading  
Split 3: Violet shading

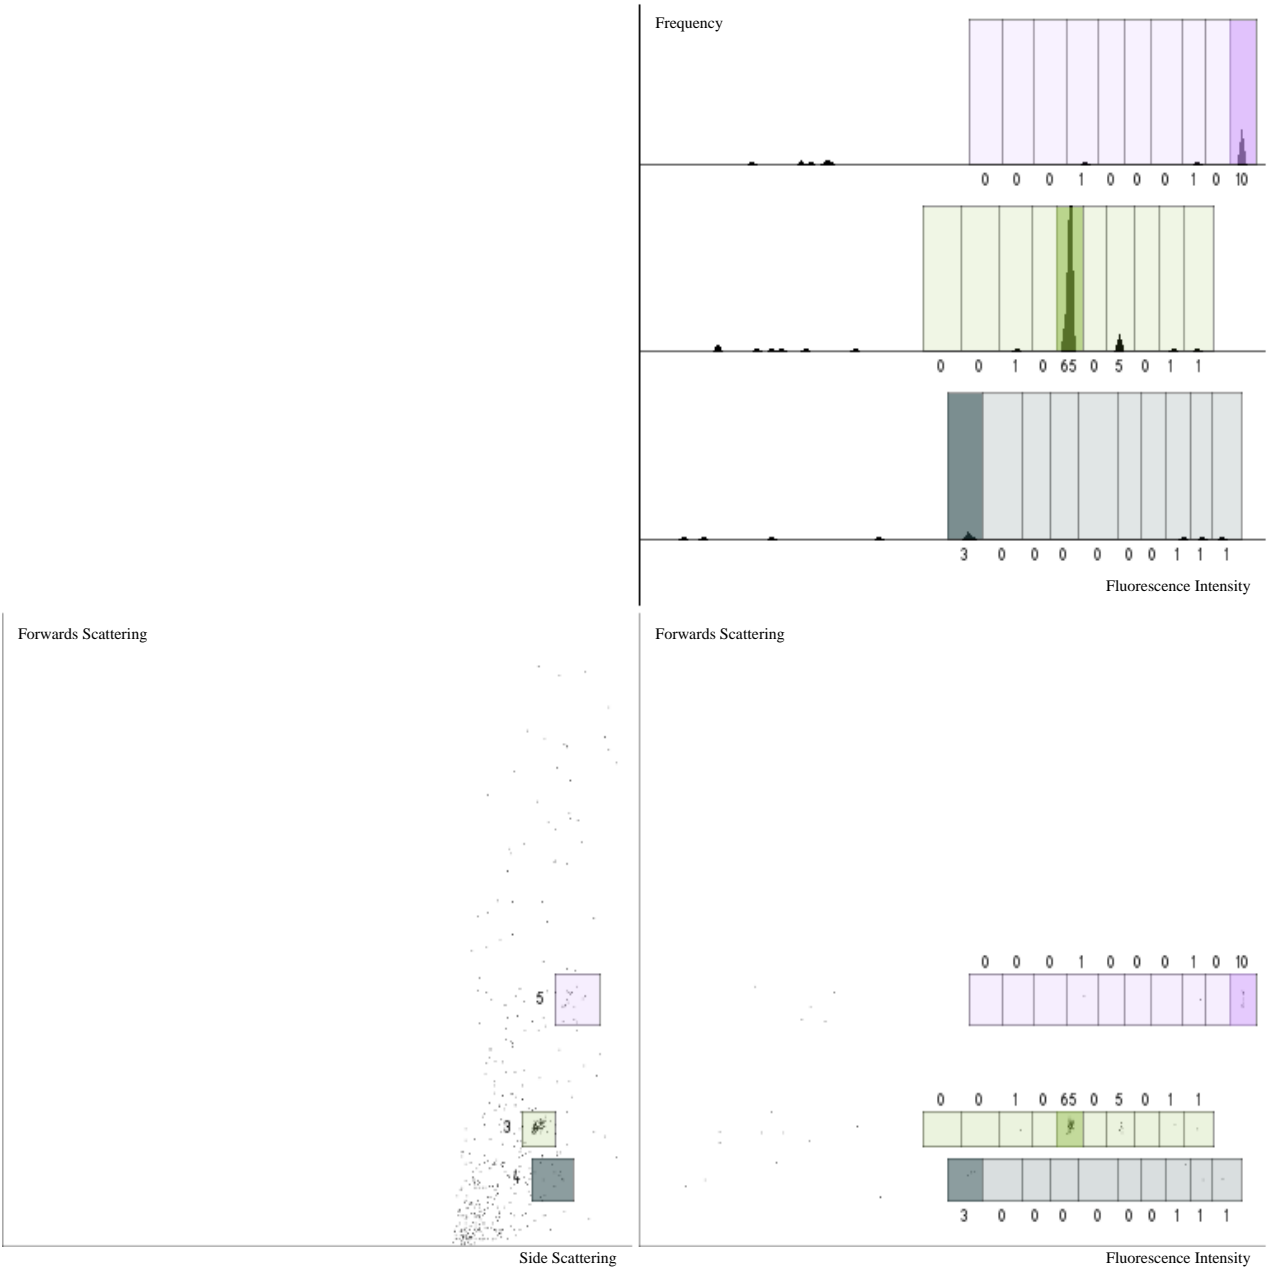

ANNEX 3: TAG DECONVOLUTION - BEAD 536

Passes flow sorting criteria: Yes  
Passes tag deconvolution criteria: Yes  
Included in protocol analysis: Yes  
Protocol: 4, 7, 9, 10  
Filename: Bin10\_plateA1\_D8.fcs  
Split 1: Petrol shading  
Split 2: Green shading  
Split 3: Violet shading

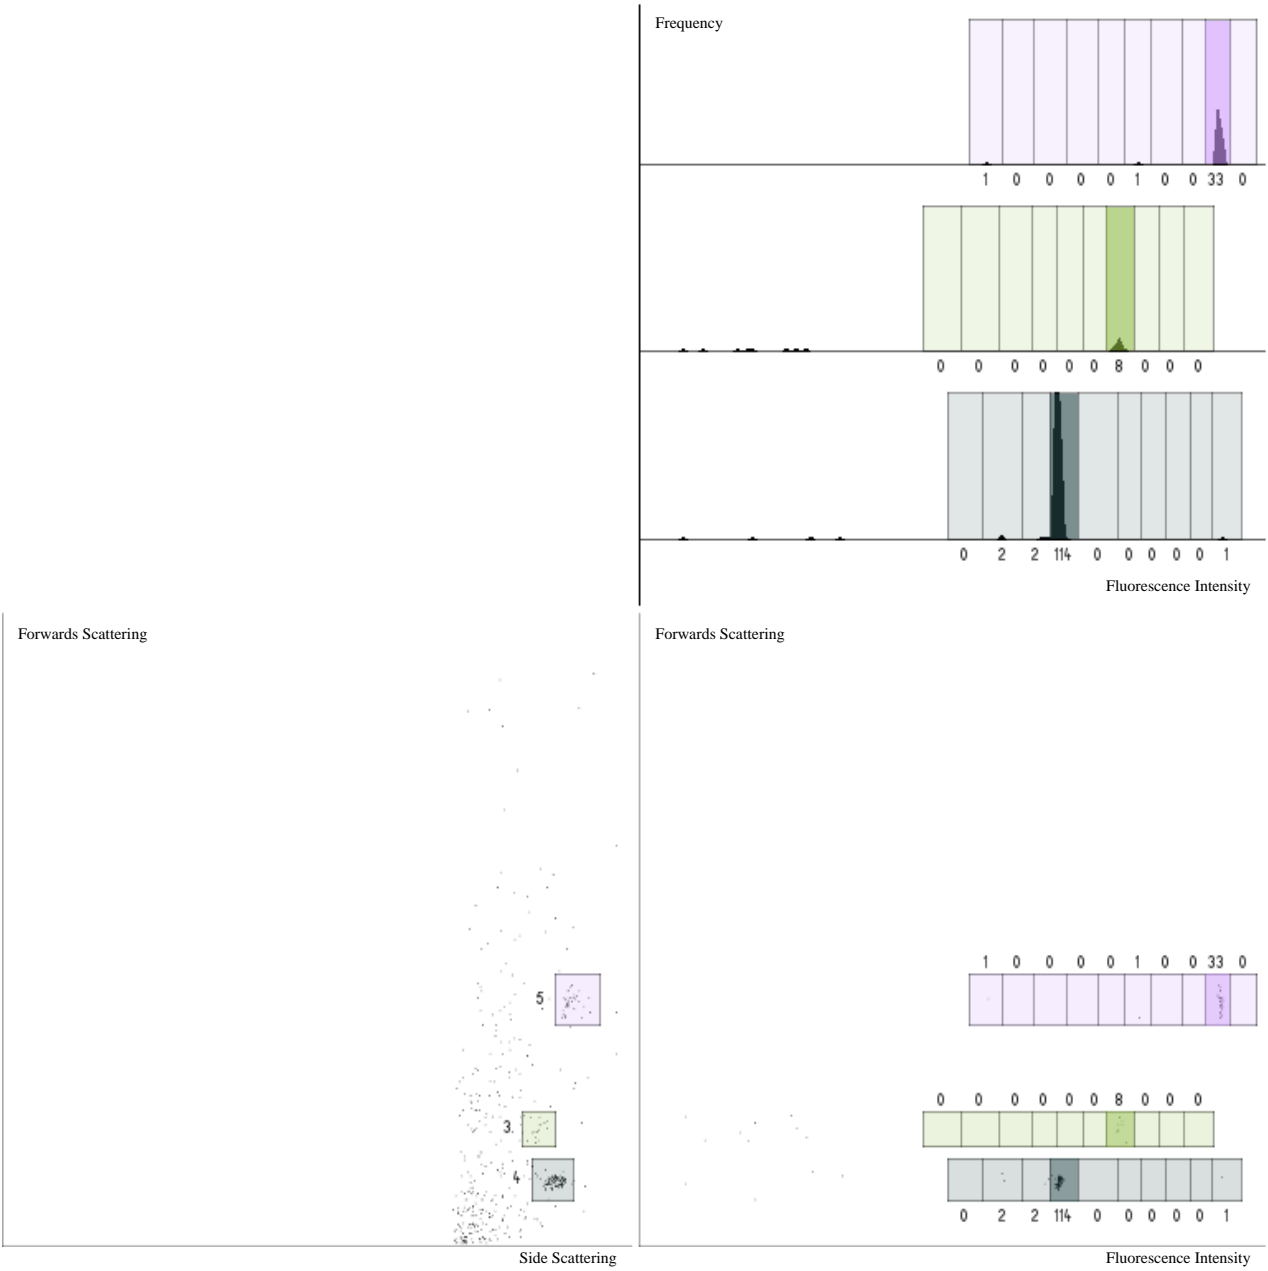

ANNEX 3: TAG DECONVOLUTION - BEAD 537

Passes flow sorting criteria: Yes  
Passes tag deconvolution criteria: Yes  
Included in protocol analysis: Yes  
Protocol: 4, 1, 3, 10  
Filename: Bin10\_plateA1\_D9.fcs  
Split 1: Petrol shading  
Split 2: Green shading  
Split 3: Violet shading

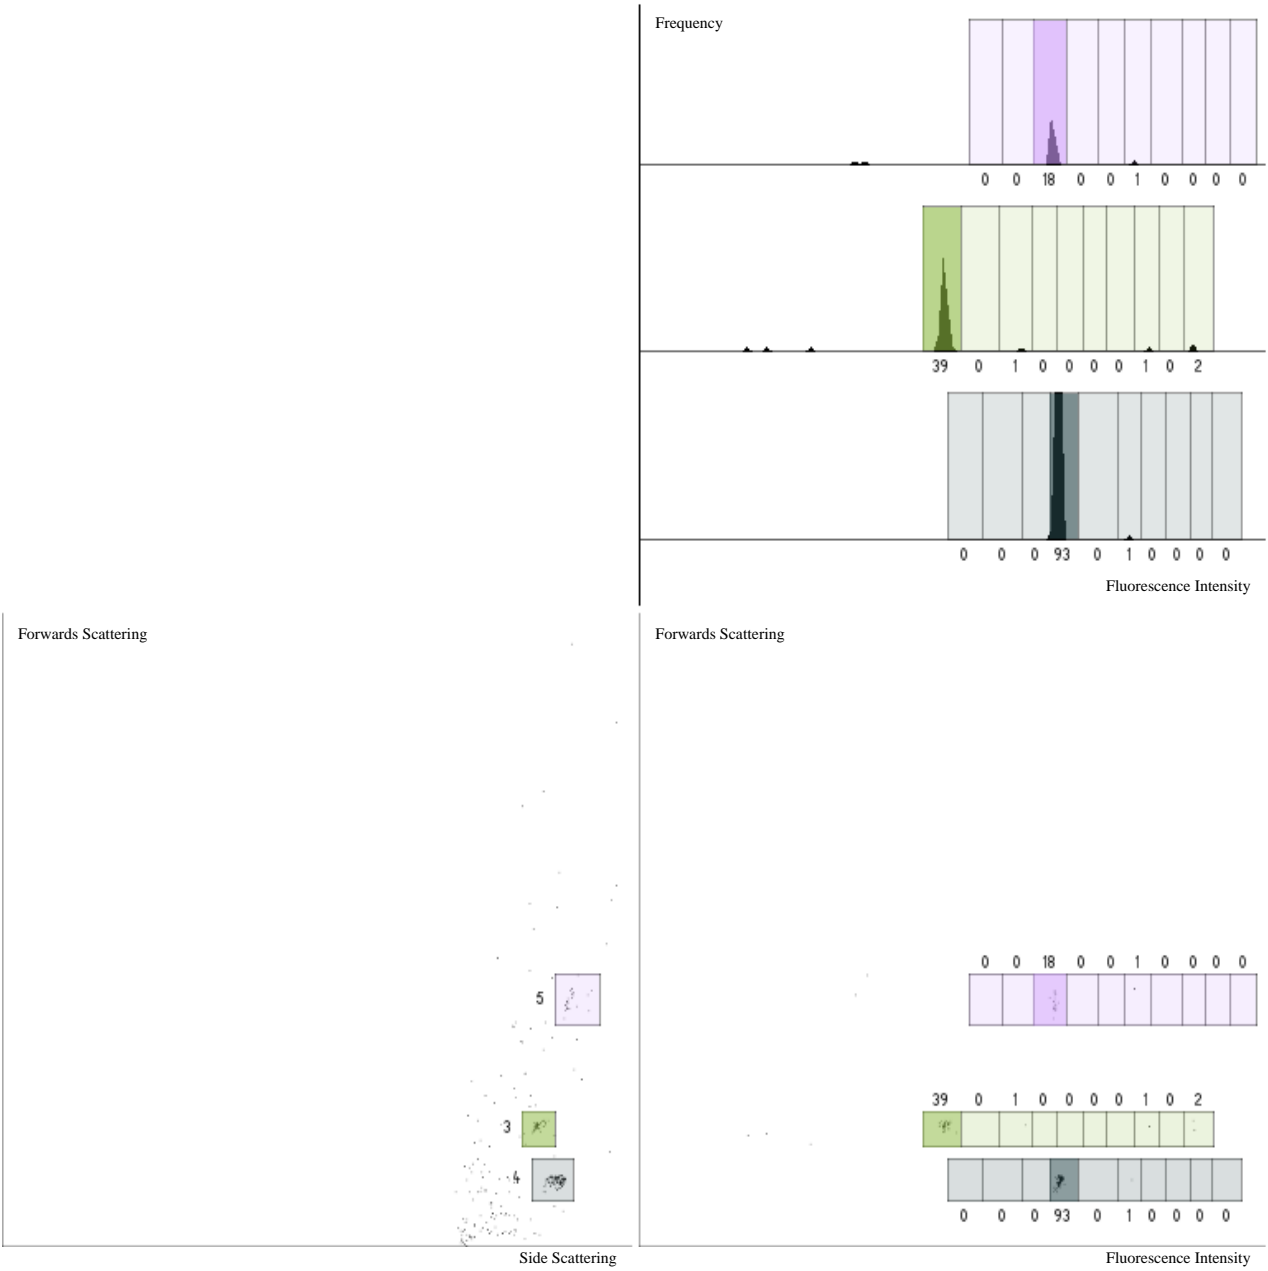

ANNEX 3: TAG DECONVOLUTION - BEAD 538

Passes flow sorting criteria: Yes  
Passes tag deconvolution criteria: Yes  
Included in protocol analysis: Yes  
Protocol: 6, 5, 9, 10  
Filename: Bin10\_plateA1\_D10.fcs  
Split 1: Petrol shading  
Split 2: Green shading  
Split 3: Violet shading

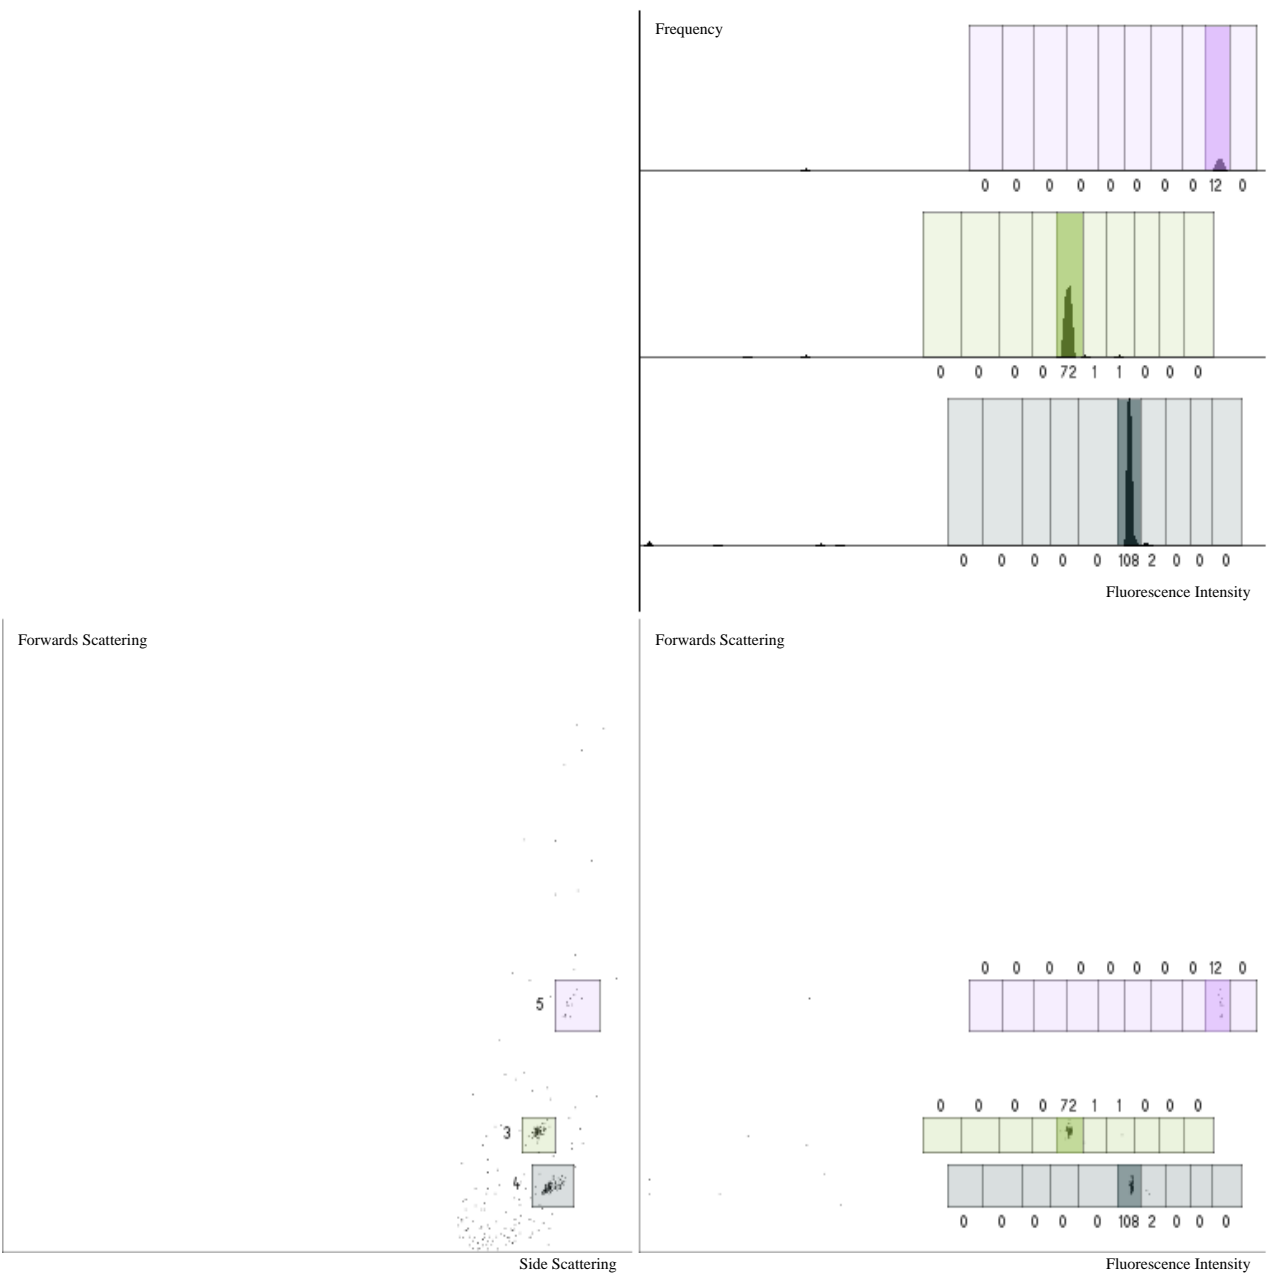

ANNEX 3: TAG DECONVOLUTION - BEAD 539

Passes flow sorting criteria: Yes  
Passes tag deconvolution criteria: Yes  
Included in protocol analysis: Yes  
Protocol: 8, 9, 1, 10  
Filename: Bin10\_plateA1\_D11.fcs  
Split 1: Petrol shading  
Split 2: Green shading  
Split 3: Violet shading

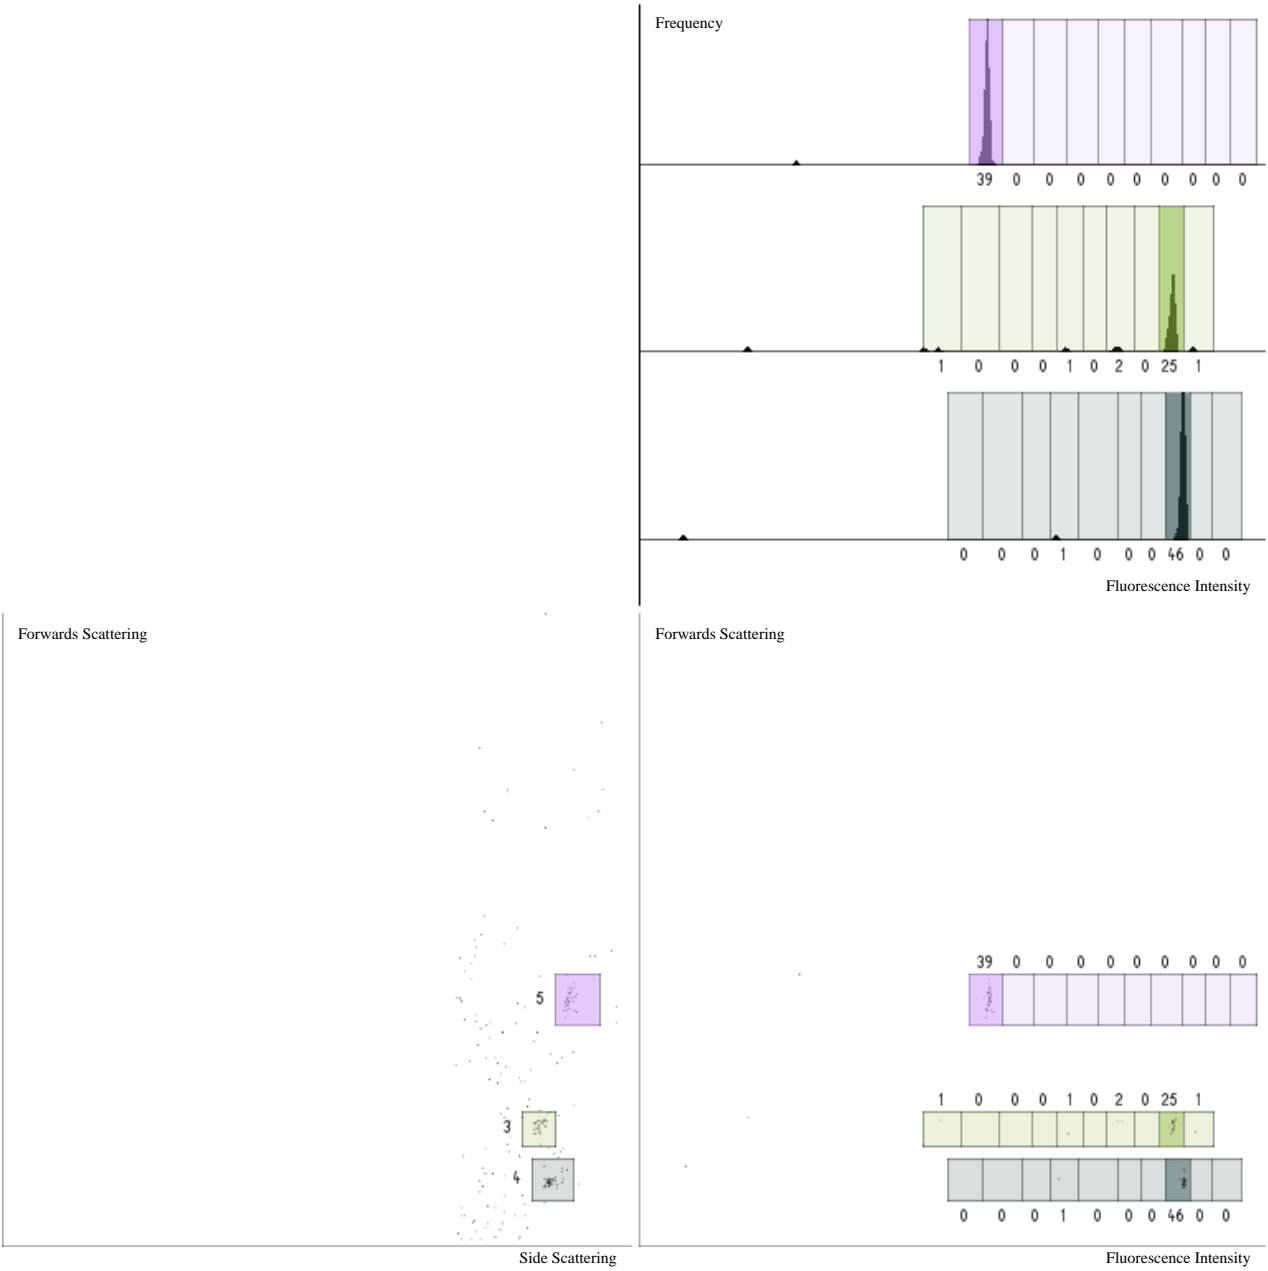

Supplement: S18 (10.1371/journal.pone.0104301.s018) [file journal.pone.0104301.s018]
